# Supplementary material for: Proteomic Profiling of Hematopoietic Stem/Progenitor Cells after a Whole Body Exposure of CBA/CaJ Mice to Titanium (48Ti) Ions
Source: Proteomes. 2015 Jul 21;3(3):132–58. doi: 10.3390/proteomes3030132 (PMC5217378; doi:10.3390/proteomes3030132)
Supplement: Supplementary File 1 [file proteomes-03-00132-s001.xlsx]

## Sheet: Quantification_All_Proteins_Bri
Entry Q#	Protein ID	Protein Entry	Gene Name	Protein Name	Protein Probability	Protein Coverage (%)	# of Identified Peptides	mean Control	mean 1wk 0.1Gy	mean 1wk 0.25Gy	mean 1wk 0.5Gy	SEM Control	SEM 1wk 0.1Gy	SEM 1wk 0.25Gy	SEM 1wk 0.5Gy	CV(%) Control	CV(%) 1wk 0.1Gy	CV(%) 1wk 0.25Gy	CV(%) 1wk 0.5Gy	FC 1wk 0.1Gy Control	Multiple_Comparison_p 1wk 0.1Gy Control	FC 1wk 0.25Gy Control	Multiple_Comparison_p 1wk 0.25Gy Control	FC 1wk 0.5Gy Control	Multiple_Comparison_p 1wk 0.5Gy Control	FC 1wk 0.25Gy 1wk 0.1Gy	Multiple_Comparison_p 1wk 0.25Gy 1wk 0.1Gy	FC 1wk 0.5Gy 1wk 0.1Gy	Multiple_Comparison_p 1wk 0.5Gy 1wk 0.1Gy	FC 1wk 0.5Gy 1wk 0.25Gy	Multiple_Comparison_p 1wk 0.5Gy 1wk 0.25Gy	ANOVA_p_value
Q$1029	P32020	NLTP_MOUSE	Scp2	Non-specific lipid-transfer protein	1	20.48	12	1075251090	976225024	1052871866	1000957868	39033820	30782376	61707752	55314887	8.1	7.1	13.1	12.4	-1.1	0.4	-1	0.9	-1.1	0.8	1.1	0.8	1	0.9	-1.1	0.9	0.5
Q$1030	P32020-2	NLTP_MOUSE	Scp	Isoform SCP2 of Non-specific lipid-transfer protein	1	55.94	10	1064665816	967713925	1043399847	991964637	39234124	30673775	61808602	55671636	8.2	7.1	13.2	12.5	-1.1	0.4	-1	0.9	-1.1	0.8	1.1	0.8	1	0.9	-1.1	0.9	0.5
Q$882	P09103	PDIA1_MOUSE	P4hb	Protein disulfide-isomerase	1	72.5	49	1027171996	907766250	1028020815	969996847	24710671	48009108	63091122	33380752	5.4	11.8	13.7	7.7	-1.1	0.3	1	1	-1.1	0.6	1.1	0.6	1.1	0.7	-1.1	0.7	0.2
Q$1217	P62962	PROF1_MOUSE	Pfn1	Profilin-1	1	77.86	16	877082190	691104602	836480647	821462651	79340681	45016272	60412443	79757059	20.2	14.6	16.1	21.7	-1.3	0.4	-1	1	-1.1	1	1.2	0.4	1.2	0.6	-1	1	0.3
Q$1829	Q9CPQ1	COX6C_MOUSE	Cox6c	Cytochrome c oxidase subunit 6C	1	44.74	4	858998672	609916369	856267679	773393446	102503595	11435542	60802771	75625876	26.7	4.2	15.9	21.9	-1.4	0.3	-1	1	-1.1	0.8	1.4	0.08	1.3	0.3	-1.1	0.8	0.08
Q$519	P54310-2	LIPS_MOUSE	Lip	Isoform 2 of Hormone-sensitive lipase	0.9976	1.37	2	836232200	820413367	824974900	798371333	28932885	45473483	30361931	24977099	7.7	12.4	8.2	7	-1	1	-1	1	-1	0.9	1	1	-1	1	-1	1	0.9
Q$1115	P51881	ADT2_MOUSE	Slc25a5	ADP/ATP translocase 2	1	65.1	22	613492116	540168302	609316207	584994644	13712863	27555334	22435461	25222776	5	11.4	8.2	9.6	-1.1	0.2	-1	0.9	-1	0.7	1.1	0.4	1.1	0.7	-1	0.7	0.1
Q$969	P20152	VIME_MOUSE	Vim	Vimentin	1	77.68	65	593273963	337774589	539745668	495063695	36398423	17485612	73260661	39426884	13.7	11.6	30.4	17.8	-1.8	0.001	-1.1	0.8	-1.2	0.3	1.6	0.2	1.5	0.03	-1.1	0.8	0.008
Q$1242	P68033	ACTC_MOUSE	Actc1	Actin, alpha cardiac muscle 1	1	50.93	27	575886349	220281625	530014986	462569608	36682172	18471403	73416275	67387365	14.2	18.8	31	32.6	-2.6	0.0001	-1.1	0.8	-1.2	0.4	2.4	0.06	2.1	0.08	-1.1	0.8	0.001
Q$1047	P35700	PRDX1_MOUSE	Prdx1	Peroxiredoxin-1	1	90.95	33	556997630	401708630	548531813	489690679	24154313	11244904	35368044	34711613	9.7	6.3	14.4	15.9	-1.4	0.002	-1	0.8	-1.1	0.4	1.4	0.06	1.2	0.2	-1.1	0.5	0.004
Q$1547	Q6ZWN5	RS9_MOUSE	Rps9	40S ribosomal protein S9	1	26.29	8	551474799	522476425	550414781	551852000	21488709	13114845	24104689	23455594	8.7	5.6	9.8	9.5	-1.1	0.9	-1	1	1	1	1.1	0.9	1.1	0.9	1	1	0.7
Q$1245	P68134	ACTS_MOUSE	Acta1	Actin, alpha skeletal muscle	1	47.21	22	509351796	183853975	464383402	406479931	34904832	17328652	66804350	59722834	15.3	21.1	32.2	32.9	-2.8	0.0002	-1.1	0.8	-1.3	0.4	2.5	0.06	2.2	0.07	-1.1	0.8	0.001
Q$889	P10126	EF1A1_MOUSE	Eef1a1	Elongation factor 1-alpha 1	1	59.31	42	505724899	296021965	485575613	431896869	31994382	8914702	38383185	36029059	14.1	6.7	17.7	18.7	-1.7	0.01	-1	0.7	-1.2	0.4	1.6	0.03	1.5	0.07	-1.1	0.6	0.0009
Q$993	P26041	MOES_MOUSE	Msn	Moesin	1	42.63	27	486718081	408305254	500214671	517600838	33487807	25008005	39902236	74217536	15.4	13.7	17.8	32.1	-1.2	0.4	1	1	1.1	1	1.2	0.4	1.3	0.6	1	1	0.4
Q$841	P02089	HBB2_MOUSE	Hbb-b2	Hemoglobin subunit beta-2	1	49.66	8	462061517	418828096	446386715	448562230	9178234	17813896	15330998	13155568	4.4	9.5	7.7	6.6	-1.1	0.3	-1	0.8	-1	0.8	1.1	0.7	1.1	0.7	1	0.9	0.2
Q$1026	P31725	S10A9_MOUSE	S100a9	Protein S100-A9	1	68.14	18	458864148	176665836	433822119	395184261	18960362	18193127	51480837	60766508	9.2	23	26.5	34.4	-2.6	3e-05	-1.1	0.9	-1.2	0.7	2.5	0.008	2.2	0.08	-1.1	0.9	0.0008
Q$840	P02088	HBB1_MOUSE	Hbb-b1	Hemoglobin subunit beta-1	1	53.74	8	445547118	417701287	434333577	439091726	10412058	18912233	11818314	9100081	5.2	10.1	6.1	4.6	-1.1	0.8	-1	0.9	-1	0.9	1	0.9	1.1	0.9	1	0.9	0.5
Q$991	P26039	TLN1_MOUSE	Tln1	Talin-1	1	50.77	83	426904842	358979560	435469017	415488567	5484293	12156919	18442827	18174541	2.9	7.6	9.5	9.8	-1.2	0.006	1	0.8	-1	0.8	1.2	0.04	1.2	0.1	-1	0.8	0.008
Q$1587	Q8BFZ3	ACTBL_MOUSE	Actbl2	Beta-actin-like protein 2	1	26.06	6	416624814	192911573	401819501	350636600	18577543	20750423	48372342	43187002	10	24.1	26.9	27.5	-2.2	0.0003	-1	0.8	-1.2	0.5	2.1	0.02	1.8	0.04	-1.1	0.7	0.001
Q$1225	P63038	CH60_MOUSE	Hspd1	60 kDa heat shock protein, mitochondrial	1	80.1	61	411558795	262256952	431258072	413354119	32386017	10481315	18248154	35384781	17.6	8.9	9.5	19.1	-1.6	0.01	1	0.9	1	1	1.6	0.0003	1.6	0.04	-1	0.9	0.001
Q$1221	P63017	HSP7C_MOUSE	Hspa8	Heat shock cognate 71 kDa protein	1	70.12	51	410528760	221236742	393636280	357038388	21772236	14315496	37524529	32835085	11.9	14.5	21.3	20.6	-1.9	0.0005	-1	0.7	-1.1	0.5	1.8	0.01	1.6	0.02	-1.1	0.7	0.0008
Q$1199	P62806	H4_MOUSE	Hist1h4a	Histone H4	1	62.14	17	398055641	195104045	675349140	434874954	74506197	27104846	49952222	20538150	41.9	31.1	16.5	10.6	-2	0.07	1.7	0.04	1.1	0.7	3.5	0.0002	2.2	0.0005	-1.6	0.009	3e-05
Q$951	P17742	PPIA_MOUSE	Ppia	Peptidyl-prolyl cis-trans isomerase A	1	65.24	14	395060554	163113556	362690647	316168265	22635071	15395846	44733778	42563169	12.8	21.1	27.6	30.1	-2.4	0.0002	-1.1	0.7	-1.2	0.4	2.2	0.01	1.9	0.04	-1.1	0.7	0.0009
Q$965	P20029	GRP78_MOUSE	Hspa5	78 kDa glucose-regulated protein	1	58.02	47	373494973	186189923	349240612	322299685	19673385	14420436	29005390	20978664	11.8	17.3	18.6	14.6	-2	0.0004	-1.1	0.7	-1.2	0.3	1.9	0.004	1.7	0.003	-1.1	0.7	7e-05
Q$942	P17182	ENOA_MOUSE	Eno1	Alpha-enolase	1	71.89	36	361446674	144795598	284210779	245417740	19085219	12523391	33027541	31820004	11.8	19.3	26	29	-2.5	8e-05	-1.3	0.1	-1.5	0.06	2	0.02	1.7	0.06	-1.2	0.4	0.0002
Q$875	P08249	MDHM_MOUSE	Mdh2	Malate dehydrogenase, mitochondrial	1	78.4	25	338653590	246633723	348102204	324399151	14239910	7123703	10009767	22582110	9.4	6.5	6.4	15.6	-1.4	0.002	1	0.8	-1	0.8	1.4	0.0002	1.3	0.09	-1.1	0.7	0.0006
Q$1318	Q03265	ATPA_MOUSE	Atp5a1	ATP synthase subunit alpha, mitochondrial	1	63.83	45	321935735	160067160	332761384	310828216	24709046	6831373	19540937	22672447	17.2	9.5	13.1	16.3	-2	0.009	1	0.9	-1	0.9	2.1	0.0002	1.9	0.009	-1.1	0.9	3e-05
Q$1117	P52480	KPYM_MOUSE	Pkm	Pyruvate kinase PKM	1	74.95	47	317038634	139730504	264665701	215620683	22170879	4433109	29341438	25103312	15.6	7.1	24.8	26	-2.3	0.006	-1.2	0.3	-1.5	0.06	1.9	0.06	1.5	0.1	-1.2	0.3	0.0003
Q$901	P11247	PERM_MOUSE	Mpo	Myeloperoxidase	1	48.05	40	297830311	178360786	275381020	247107135	8628227	8824657	12831197	24312162	6.5	11.1	10.4	22	-1.7	6e-05	-1.1	0.3	-1.2	0.2	1.5	0.001	1.4	0.1	-1.1	0.3	0.0002
Q$1714	Q8VDD5	MYH9_MOUSE	Myh9	Myosin-9	1	44.18	93	278537825	133930618	260063629	230645602	20944828	10400352	25094870	27584481	16.8	17.4	21.6	26.7	-2.1	0.002	-1.1	0.7	-1.2	0.5	1.9	0.008	1.7	0.04	-1.1	0.7	0.001
Q$940	P16858	G3P_MOUSE	Gapdh	Glyceraldehyde-3-phosphate dehydrogenase	1	78.98	31	276294620	132401541	244485013	204615924	13674978	8930576	27043845	21472876	11.1	15.1	24.7	23.5	-2.1	0.0001	-1.1	0.5	-1.4	0.07	1.8	0.02	1.5	0.06	-1.2	0.5	0.0004
Q$1769	Q922Q8	LRC59_MOUSE	Lrrc59	Leucine-rich repeat-containing protein 59	1	38.76	11	268284778	226322690	189746421	212759568	20868181	23122682	8103158	14876462	17.4	22.8	9.5	15.6	-1.2	0.5	-1.4	0.05	-1.3	0.3	-1.2	0.5	-1.1	0.6	1.1	0.5	0.04
Q$1138	P56480	ATPB_MOUSE	Atp5b	ATP synthase subunit beta, mitochondrial	1	72.21	39	254076469	129838288	255828975	242765558	18674523	6880943	14909380	15642035	16.4	11.9	13	14.4	-2	0.001	1	0.9	-1	0.9	2	0.0004	1.9	0.0008	-1.1	0.9	3e-05
Q$922	P14211	CALR_MOUSE	Calr	Calreticulin	1	73.32	32	252825277	114653992	201907765	187962317	19750557	3415629	15834238	19459484	17.5	6.7	17.5	23.1	-2.2	0.01	-1.3	0.2	-1.3	0.1	1.8	0.02	1.6	0.07	-1.1	0.6	0.0002
Q$1763	Q922D8	C1TC_MOUSE	Mthfd1	C-1-tetrahydrofolate synthase, cytoplasmic	1	32.62	19	224740825	209954676	239787274	227091717	11111373	9769126	11461600	17779422	11.1	10.4	10.7	17.5	-1.1	0.9	1.1	0.9	1	0.9	1.1	0.4	1.1	0.9	-1.1	0.9	0.5
Q$2118	P16858	G3P_MOUSE	Gapdh	Glyceraldehyde-3-phosphate dehydrogenase	1	73.87	23	215103626	108085182	190304754	158690914	8809892	8175055	19056206	13719415	9.2	16.9	22.4	19.3	-2	0.0001	-1.1	0.4	-1.4	0.03	1.8	0.02	1.5	0.04	-1.2	0.4	0.0002
Q$1141	P57780	ACTN4_MOUSE	Actn4	Alpha-actinin-4	1	32.79	20	197229181	180538264	192341500	182089847	2352226	4040409	9722627	8178514	2.7	5	11.3	10	-1.1	0.04	-1	0.9	-1.1	0.5	1.1	0.8	1	0.9	-1.1	0.8	0.3
Q$1080	P47738	ALDH2_MOUSE	Aldh2	Aldehyde dehydrogenase, mitochondrial	1	77.84	35	193644289	124032750	188270984	180075302	13956971	4262656	11093540	12619376	16.1	7.7	13.2	15.7	-1.6	0.02	-1	0.9	-1.1	0.9	1.5	0.004	1.5	0.01	-1	0.9	0.001
Q$915	P13020-2	GELS_MOUSE	Gs	Isoform 2 of Gelsolin	1	52.12	25	191808323	161519195	198792376	198167652	10974648	9420768	12668031	27326798	12.8	13	14.2	30.8	-1.2	0.3	1	1	1	1	1.2	0.2	1.2	0.7	-1	1	0.4
Q$905	P11499	HS90B_MOUSE	Hsp90ab1	Heat shock protein HSP 90-beta	1	54.01	46	189492334	85470168	175732592	151904496	10822772	5022287	18918838	15905811	12.8	13.1	24.1	23.4	-2.2	0.0001	-1.1	0.6	-1.2	0.2	2.1	0.04	1.8	0.05	-1.2	0.6	0.0003
Q$1662	Q8CGP4	Q8CGP4_MOUSE	Hist1h2aa	Histone H2A	1	31.01	2	186829779	137228004	333880229	222839514	36934611	28064876	32474484	6931573	44.2	45.7	21.7	7	-1.4	0.5	1.8	0.08	1.2	0.5	2.4	0.01	1.6	0.1	-1.5	0.1	0.001
Q$1007	P27773	PDIA3_MOUSE	Pdia3	Protein disulfide-isomerase A3	1	60.59	38	182620421	82245605	164091573	143549967	14669289	4404310	11972841	15428680	18	12	16.3	24	-2.2	0.008	-1.1	0.5	-1.3	0.3	2	0.001	1.7	0.06	-1.1	0.5	0.0002
Q$871	P08113	ENPL_MOUSE	Hsp90b1	Endoplasmin	1	53.12	47	182534961	83069803	160516531	142981690	13692124	3342251	13214342	13183848	16.8	9	18.4	20.6	-2.2	0.008	-1.1	0.5	-1.3	0.2	1.9	0.02	1.7	0.03	-1.1	0.5	0.0001
Q$2085	Q9WVA4	TAGL2_MOUSE	Tagln2	Transgelin-2	1	87.44	22	180221427	132046993	174064660	161058993	7544518	6392377	10297172	12338221	9.4	10.8	13.2	17.1	-1.4	0.007	-1	0.7	-1.1	0.5	1.3	0.04	1.2	0.3	-1.1	0.7	0.01
Q$1144	P58252	EF2_MOUSE	Eef2	Elongation factor 2	1	56.41	55	179055832	105072282	179855405	165520146	10383724	3198081	18421580	19308498	13	6.8	22.9	26.1	-1.7	0.008	1	1	-1.1	0.9	1.7	0.07	1.6	0.1	-1.1	0.9	0.006
Q$909	P11983	TCPA_MOUSE	Tcp1	T-complex protein 1 subunit alpha	1	43.71	16	174910047	156708335	180350539	166631186	5431593	6182871	4981948	8201395	6.9	8.8	6.2	11	-1.1	0.3	1	0.7	-1	0.7	1.2	0.1	1.1	0.7	-1.1	0.6	0.08
Q$1446	Q61233	PLSL_MOUSE	Lcp1	Plastin-2	1	63.48	43	166659924	74513505	141477362	124706114	12853134	4286205	16097512	14943630	17.2	12.9	25.4	26.8	-2.2	0.0008	-1.2	0.4	-1.3	0.2	1.9	0.06	1.7	0.1	-1.1	0.5	0.001
Q$884	P09411	PGK1_MOUSE	Pgk1	Phosphoglycerate kinase 1	1	78.42	30	160988966	74797068	135999964	119547083	11676527	5642250	16435635	16037729	16.2	16.9	27	30	-2.2	0.001	-1.2	0.4	-1.3	0.2	1.8	0.04	1.6	0.1	-1.1	0.5	0.002
Q$506	E9Q1Z0	E9Q1Z0_MOUSE	4732456N10Rik	Protein 4732456N10Rik	1	4.28	2	160876633	176059167	146188067	151380600	7154367	13041467	6877797	8242925	9.9	16.6	10.5	12.2	1.1	0.7	-1.1	0.6	-1.1	0.7	-1.2	0.4	-1.2	0.6	1	0.7	0.1
Q$888	P10107	ANXA1_MOUSE	Anxa1	Annexin A1	1	71.68	28	158692026	75964161	140175612	125330609	11235660	3077795	14736103	9099933	15.8	9.1	23.5	16.2	-2.1	0.006	-1.1	0.6	-1.3	0.1	1.8	0.04	1.6	0.005	-1.1	0.6	0.0003
Q$1969	Q9DBJ1	PGAM1_MOUSE	Pgam1	Phosphoglycerate mutase 1	1	71.26	24	156703765	68257382	121020677	105443429	9775101	2659024	12741889	8500963	13.9	8.7	23.5	18	-2.3	0.003	-1.3	0.1	-1.5	0.02	1.8	0.04	1.5	0.04	-1.1	0.3	5e-05
Q$1565	Q7TPV4	MBB1A_MOUSE	Mybbp1a	Myb-binding protein 1A	1	23.07	19	152090725	129852157	151913121	141339347	4165232	8657414	7936877	6202832	6.1	14.9	11.7	9.8	-1.2	0.3	-1	1	-1.1	0.6	1.2	0.4	1.1	0.7	-1.1	0.7	0.1
Q$855	P05064	ALDOA_MOUSE	Aldoa	Fructose-bisphosphate aldolase A	1	87.09	43	149021078	56285295	127165094	106116687	10586889	4158886	15824971	13460728	15.9	16.5	27.8	28.4	-2.6	0.0002	-1.2	0.5	-1.4	0.1	2.3	0.05	1.9	0.07	-1.2	0.5	0.0003
Q$1502	Q64433	CH10_MOUSE	Hspe1	10 kDa heat shock protein, mitochondrial	1	70.59	11	140784740	65748231	170641028	138284408	13274839	6631516	11127736	11102260	21.1	22.6	14.6	18	-2.1	0.004	1.2	0.2	-1	0.9	2.6	0.0002	2.1	0.003	-1.2	0.2	3e-05
Q$957	P18242	CATD_MOUSE	Ctsd	Cathepsin D	1	41.95	17	136472853	98229387	135197508	126490068	3573633	3295338	7760643	5553616	5.9	7.5	12.8	9.8	-1.4	0.0003	-1	0.9	-1.1	0.4	1.4	0.01	1.3	0.01	-1.1	0.6	0.0004
Q$1094	P49290	PERE_MOUSE	Epx	Eosinophil peroxidase	1	51.26	39	135429399	96077258	145192284	118529528	6727774	4591372	8143868	10996475	11.1	10.7	12.5	20.7	-1.4	0.006	1.1	0.4	-1.1	0.4	1.5	0.005	1.2	0.3	-1.2	0.3	0.003
Q$1303	P99024	TBB5_MOUSE	Tubb5	Tubulin beta-5 chain	1	56.53	23	135117209	64649894	128846420	112033950	3785730	7133422	15882684	12975223	6.3	24.7	27.6	25.9	-2.1	0.0001	-1	0.7	-1.2	0.4	2	0.03	1.7	0.05	-1.2	0.7	0.001
Q$98	A6ZI44	A6ZI44_MOUSE	Aldoa	Fructose-bisphosphate aldolase	1	68.42	32	129399090	50034547	111380725	93010198	8589422	3832721	13533159	11504586	14.8	17.1	27.2	27.7	-2.6	0.0002	-1.2	0.5	-1.4	0.1	2.2	0.04	1.9	0.04	-1.2	0.5	0.0003
Q$597	F6Y6L6	F6Y6L6_MOUSE	Ctsd	Cathepsin D (Fragment)	1	57.91	15	129115932	94912326	127702505	119754760	3099219	3031926	6859064	4922319	5.4	7.1	12	9.2	-1.4	0.0003	-1	0.9	-1.1	0.4	1.3	0.01	1.3	0.01	-1.1	0.6	0.0003
Q$1046	P35564	CALX_MOUSE	Canx	Calnexin	1	40.27	21	127697260	99514976	133398539	123956517	6296294	5205236	11680841	5352920	11	11.7	19.6	9.7	-1.3	0.05	1	0.9	-1	0.9	1.3	0.1	1.2	0.06	-1.1	0.9	0.03
Q$958	P18760	COF1_MOUSE	Cfl1	Cofilin-1	1	70.48	17	124731999	50407159	113634854	100343279	6275615	3904543	12528408	12701362	11.3	17.3	24.7	28.3	-2.5	5e-05	-1.1	0.7	-1.2	0.3	2.3	0.03	2	0.06	-1.1	0.7	0.0003
Q$867	P07901	HS90A_MOUSE	Hsp90aa1	Heat shock protein HSP 90-alpha	1	56.62	44	124040223	60833382	121803321	105712044	6947717	2222019	10281622	11119752	12.5	8.2	18.9	23.5	-2	0.002	-1	0.9	-1.2	0.5	2	0.02	1.7	0.06	-1.2	0.5	0.0002
Q$1312	Q01853	TERA_MOUSE	Vcp	Transitional endoplasmic reticulum ATPase	1	58.81	38	121578013	64074532	117948659	103042315	4882152	2879427	11849446	10748709	9	10	22.5	23.3	-1.9	5e-05	-1	0.8	-1.2	0.4	1.8	0.04	1.6	0.08	-1.1	0.6	0.0007
Q$839	P01942	HBA_MOUSE	Hba	Hemoglobin subunit alpha	1	83.8	16	116052633	71712963	139434509	130926192	9623612	6625461	21830873	11464093	18.5	20.7	35	19.6	-1.6	0.03	1.2	0.7	1.1	0.7	1.9	0.1	1.8	0.01	-1.1	0.7	0.01
Q$478	Q8BFQ1	Q8BFQ1_MOUSE	Psap	Prosaposin, isoform CRA_a	1	39.89	18	113691443	52385734	100273187	80875476	9863368	4430123	6815825	7998489	19.4	18.9	15.2	22.1	-2.2	0.002	-1.1	0.3	-1.4	0.09	1.9	0.002	1.5	0.06	-1.2	0.2	0.0002
Q$863	P07356	ANXA2_MOUSE	Anxa2	Annexin A2	1	66.08	30	110727653	51596986	98142652	87221639	8915035	2471684	9415727	1923463	18	10.7	21.5	4.9	-2.1	0.009	-1.1	0.5	-1.3	0.2	1.9	0.03	1.7	2e-05	-1.1	0.5	8e-05
Q$1732	Q91VB8	Q91VB8_MOUSE	Hba	Hemoglobin alpha 1	1	83.8	16	107903382	64290262	129057801	120471025	8879578	7114795	19861760	10652131	18.4	24.7	34.4	19.8	-1.7	0.02	1.2	0.7	1.1	0.7	2	0.06	1.9	0.01	-1.1	0.7	0.01
Q$883	P09405	NUCL_MOUSE	Ncl	Nucleolin	1	29.28	25	105264916	66111649	107073392	93705368	2984349	3501565	10424941	8168577	6.3	11.8	21.8	19.5	-1.6	0.0002	1	0.9	-1.1	0.5	1.6	0.03	1.4	0.06	-1.1	0.6	0.003
Q$1044	P35486	ODPA_MOUSE	Pdha1	Pyruvate dehydrogenase E1 component subunit alpha, somatic form, mitochondrial	1	34.36	7	103033185	89688962	99526647	97999139	2380604	4190638	4740557	4156761	5.2	10.4	10.7	9.5	-1.1	0.1	-1	0.8	-1.1	0.7	1.1	0.6	1.1	0.6	-1	0.8	0.1
Q$1713	Q9CQ43	Q9CQ43_MOUSE	Dut	Deoxyuridine triphosphatase	1	45.06	5	102650137	110333084	110811226	108871690	5578088	7649561	5456856	7122628	12.2	15.5	11	14.6	1.1	0.9	1.1	0.9	1.1	0.9	1	1	-1	1	-1	1	0.8
Q$935	Q8C253	Q8C253_MOUSE	Lgals3	Galectin	1	49.62	17	101265062	48203473	97699214	78884914	7403850	3176504	10818707	7310095	16.3	14.7	24.8	20.7	-2.1	0.001	-1	0.8	-1.3	0.2	2	0.03	1.6	0.02	-1.2	0.3	0.0006
Q$1903	Q9CZU6	CISY_MOUSE	Cs	Citrate synthase, mitochondrial	1	54.74	24	101101433	53060769	102427061	88824031	10566318	3386517	6688538	8148761	23.4	14.3	14.6	20.5	-1.9	0.03	1	0.9	-1.1	0.6	1.9	0.001	1.7	0.02	-1.2	0.5	0.001
Q$693	G5E8N5	G5E8N5_MOUSE	Ldha	L-lactate dehydrogenase	1	66.48	22	99187498	38591682	88612874	73461837	6272924	2968793	10206512	7804870	14.1	17.2	25.8	23.8	-2.6	0.0001	-1.1	0.5	-1.4	0.1	2.3	0.02	1.9	0.02	-1.2	0.5	0.0001
Q$1056	P38647	GRP75_MOUSE	Hspa9	Stress-70 protein, mitochondrial	1	54.93	35	98860849	62183630	102114266	99240333	7786511	2257051	6822897	7530958	17.6	8.1	14.9	17	-1.6	0.03	1	1	1	1	1.6	0.003	1.6	0.03	-1	1	0.001
Q$1247	P68372	TBB4B_MOUSE	Tubb4b	Tubulin beta-4B chain	1	56.4	24	98212692	48822945	95130232	82025684	3061748	4411569	10913805	7755002	7	20.2	25.7	21.1	-2	9e-05	-1	0.8	-1.2	0.2	1.9	0.02	1.7	0.02	-1.2	0.6	0.0007
Q$1672	Q8JZR0	ACSL5_MOUSE	Acsl5	Long-chain-fatty-acid--CoA ligase 5	1	5.42	3	97386180	37981850	86188120	72404250	5307115	3689895	10266966	9578154	12.2	21.7	26.6	29.6	-2.6	0.0001	-1.1	0.6	-1.3	0.1	2.3	0.01	1.9	0.04	-1.2	0.6	0.0003
Q$1569	Q80UM7	MOGS_MOUSE	Mogs	Mannosyl-oligosaccharide glucosidase	1	9.71	4	96534607	68836722	169850949	114539217	19028400	14412458	16417618	4311048	44.1	46.8	21.6	8.4	-1.4	0.5	1.8	0.09	1.2	0.5	2.5	0.01	1.7	0.1	-1.5	0.1	0.001
Q$1127	P54320	ELN_MOUSE	Eln	Elastin	1	50.35	11	93738255	99307212	105052180	107394680	3787789	7718715	4542192	4584950	9	17.4	9.7	9.5	1.1	0.9	1.1	0.4	1.1	0.3	1.1	0.9	1.1	0.9	1	0.9	0.3
Q$1901	Q9CZN7	Q9CZN7_MOUSE	Shmt2	Serine hydroxymethyltransferase	1	64.48	30	89562062	51509514	90655648	81317286	6926434	1558565	5381436	8000119	17.3	6.8	13.3	22	-1.7	0.02	1	0.9	-1.1	0.7	1.8	0.007	1.6	0.07	-1.1	0.7	0.0008
Q$1503	Q64444	CAH4_MOUSE	Ca4	Carbonic anhydrase 4	0.9996	11.8	3	88933730	69347236	88452750	82160150	2320933	4005706	6565403	4467054	5.8	12.9	16.6	12.2	-1.3	0.02	-1	0.9	-1.1	0.5	1.3	0.2	1.2	0.2	-1.1	0.7	0.03
Q$1059	P40142	TKT_MOUSE	Tkt	Transketolase	1	60.83	34	87172680	45429679	82718987	74350545	4613934	2820405	9006181	7567299	11.8	13.9	24.3	22.8	-1.9	0.0003	-1.1	0.7	-1.2	0.5	1.8	0.05	1.6	0.04	-1.1	0.7	0.001
Q$850	P04187	GRAB_MOUSE	Gzmb	Granzyme B(G,H)	1	46.56	15	86529545	70238193	88942617	79011269	2230230	6624485	5284559	5541929	5.8	21.1	13.3	15.7	-1.2	0.3	1	0.7	-1.1	0.6	1.3	0.3	1.1	0.6	-1.1	0.6	0.08
Q$1792	Q99KI0	ACON_MOUSE	Aco2	Aconitate hydratase, mitochondrial	1	41.92	28	83098922	42680653	81877671	74000298	6238549	2564596	4446332	4732028	16.8	13.4	12.1	14.3	-1.9	0.002	-1	0.9	-1.1	0.6	1.9	0.0004	1.7	0.002	-1.1	0.6	4e-05
Q$1280	P84228	H32_MOUSE	Hist1h3b	Histone H3.2	1	43.38	6	83010847	72586809	111233380	88991891	7870610	7715682	8296926	8126691	21.2	23.8	16.7	20.4	-1.1	0.6	1.3	0.2	1.1	0.6	1.5	0.05	1.2	0.5	-1.2	0.3	0.02
Q$1031	P32037	GTR3_MOUSE	Slc2a3	Solute carrier family 2, facilitated glucose transporter member 3	1	9.13	5	82680982	45832987	129755892	88883267	10243571	6903770	10040488	6145605	27.7	33.7	17.3	15.5	-1.8	0.03	1.6	0.03	1.1	0.6	2.8	0.0008	1.9	0.008	-1.5	0.03	4e-05
Q$1963	Q9DB20	ATPO_MOUSE	Atp5o	ATP synthase subunit O, mitochondrial	1	54.46	11	82556320	36927482	81558710	72552987	4804654	4387624	7512333	6235858	13	26.6	20.6	19.2	-2.2	0.0007	-1	0.9	-1.1	0.6	2.2	0.004	2	0.006	-1.1	0.6	0.0001
Q$2067	Q9WTP6-2	KAD2_MOUSE	Ak	Isoform 2 of Adenylate kinase 2, mitochondrial	1	72.41	15	81701662	82051319	87089981	85521618	2843308	4866736	4360663	5668301	7.8	13.3	11.2	14.8	1	1	1.1	0.9	1	1	1.1	1	1	1	-1	1	0.8
Q$1069	P43277	H13_MOUSE	Hist1h1d	Histone H1.3	1	22.62	13	81482025	49871289	114131945	84318617	5541442	1163510	11361047	5083967	15.2	5.2	22.3	13.5	-1.6	0.02	1.4	0.09	1	0.7	2.3	0.02	1.7	0.01	-1.4	0.09	7e-05
Q$1407	Q5SXR6	Q5SXR6_MOUSE	Cltc	Clathrin heavy chain	1	43.36	47	80582300	37142448	71267249	61823099	4924490	2151710	6942242	6584774	13.7	13	21.8	23.8	-2.2	0.0002	-1.1	0.5	-1.3	0.1	1.9	0.03	1.7	0.03	-1.2	0.5	0.0003
Q$1728	Q8VIJ6	SFPQ_MOUSE	Sfpq	Splicing factor, proline- and glutamine-rich	1	36.77	19	80572791	31240127	70084062	60667087	2409215	2400792	9679903	7119708	6.7	17.2	30.9	26.2	-2.6	3e-06	-1.1	0.6	-1.3	0.09	2.2	0.06	1.9	0.02	-1.2	0.6	0.0003
Q$2011	Q9JHJ0	TMOD3_MOUSE	Tmod3	Tropomodulin-3	1	12.78	4	80301568	66866838	79809419	76762915	1792766	3620236	5340218	3848610	5	12.1	15	11.2	-1.2	0.06	-1	0.9	-1	0.8	1.2	0.3	1.1	0.3	-1	0.9	0.09
Q$1696	Q8R180	ERO1A_MOUSE	Ero1l	ERO1-like protein alpha	1	38.58	15	78275371	31673068	59583764	51347132	4637760	1826934	6613389	5980880	13.2	12.9	24.8	26	-2.5	8e-05	-1.3	0.1	-1.5	0.04	1.9	0.04	1.6	0.08	-1.2	0.4	9e-05
Q$1411	Q60604	ADSV_MOUSE	Scin	Adseverin	1	45.31	18	78095084	62724384	77421653	72835061	3157344	3517678	4992406	4579802	9	12.5	14.4	14.1	-1.2	0.07	-1	0.9	-1.1	0.8	1.2	0.2	1.2	0.4	-1.1	0.8	0.06
Q$1230	P63101	1433Z_MOUSE	Ywhaz	14-3-3 protein zeta/delta	1	54.69	15	78024225	41429187	67897917	61209316	4988418	1848317	5833634	5527701	14.3	10	19.2	20.2	-1.9	0.0008	-1.1	0.4	-1.3	0.2	1.6	0.04	1.5	0.04	-1.1	0.4	0.0005
Q$903	P11352	GPX1_MOUSE	Gpx1	Glutathione peroxidase 1	1	66.17	13	77286377	55496580	74750359	67883993	2784508	3973683	6526546	4331361	8.1	16	19.5	14.3	-1.4	0.01	-1	0.7	-1.1	0.3	1.3	0.2	1.2	0.2	-1.1	0.6	0.02
Q$1776	Q93092	TALDO_MOUSE	Taldo1	Transaldolase	1	54.3	18	74438118	30943891	68889828	57939113	3838394	3635209	8138232	6712653	11.5	26.3	26.4	25.9	-2.4	0.0002	-1.1	0.6	-1.3	0.2	2.2	0.01	1.9	0.03	-1.2	0.6	0.0004
Q$185	D3YWH9	D3YWH9_MOUSE	Rps9	40S ribosomal protein S9	1	24.26	6	72720799	70731265	77754092	72714090	5124749	6097942	7191686	6972362	15.8	19.3	20.7	21.4	-1	1	1.1	1	-1	1	1.1	1	1	1	-1.1	1	0.9
Q$1066	P43274	H14_MOUSE	Hist1h1e	Histone H1.4	1	22.37	13	72718372	34745172	101625481	67583077	7488373	1021868	9679030	3753086	23	6.6	21.3	12.4	-2.1	0.03	1.4	0.09	-1.1	0.6	2.9	0.01	1.9	0.003	-1.5	0.03	2e-05
Q$892	P10605	CATB_MOUSE	Ctsb	Cathepsin B	1	36.58	10	72187325	34419796	72537991	57013393	2162907	3131878	7862520	4913002	6.7	20.3	24.2	19.3	-2.1	5e-05	1	1	-1.3	0.07	2.1	0.01	1.7	0.02	-1.3	0.2	0.0002
Q$1942	Q9D6R2	IDH3A_MOUSE	Idh3a	Isocitrate dehydrogenase [NAD] subunit alpha, mitochondrial	1	39.34	15	70519070	52785264	69554902	66097006	3297804	1396493	2532299	2513470	10.5	5.9	8.1	8.5	-1.3	0.006	-1	0.8	-1.1	0.7	1.3	0.002	1.3	0.007	-1.1	0.7	0.0005
Q$136	P56567	CYTA_MOUSE	Csta	Cystatin-A	1	73.2	9	70418857	15766220	47810605	41295660	6229311	913030	8462284	9502478	19.8	12.9	39.6	51.5	-4.5	0.005	-1.5	0.2	-1.7	0.1	3	0.09	2.6	0.2	-1.2	0.6	0.0006
Q$963	P19783	COX41_MOUSE	Cox4i1	Cytochrome c oxidase subunit 4 isoform 1, mitochondrial	1	28.99	5	70366961	31697873	63586346	53501596	4901396	3678266	2824902	4377730	15.6	25.9	9.9	18.3	-2.2	0.001	-1.1	0.3	-1.3	0.1	2	0.0008	1.7	0.02	-1.2	0.2	3e-05
Q$1365	Q3U7R1	ESYT1_MOUSE	Esyt1	Extended synaptotagmin-1	1	34.34	24	70302734	37226871	70209790	62250652	6204721	1332812	4059290	5002361	19.7	8	12.9	18	-1.9	0.03	-1	1	-1.1	0.6	1.9	0.0003	1.7	0.03	-1.1	0.6	0.0002
Q$1246	P68368	TBA4A_MOUSE	Tuba4a	Tubulin alpha-4A chain	1	62.05	27	69300486	34234097	64722891	54040582	2397226	1578246	6528760	4979540	7.7	10.3	22.6	20.6	-2	1e-05	-1.1	0.5	-1.3	0.07	1.9	0.04	1.6	0.05	-1.2	0.4	0.0002
Q$1628	Q8BT60	CPNE3_MOUSE	Cpne3	Copine-3	0.9996	8.26	3	68978916	63009504	71540347	66458231	1734612	2443462	5048724	4454828	5.6	8.7	15.8	15	-1.1	0.4	1	0.9	-1	0.9	1.1	0.6	1.1	0.9	-1.1	0.9	0.4
Q$1482	Q62351	TFR1_MOUSE	Tfrc	Transferrin receptor protein 1	1	30.14	16	68962474	57665005	68554848	66591637	4517794	4981675	7863569	5664170	14.6	19.3	25.6	19	-1.2	0.6	-1	1	-1	1	1.2	0.8	1.2	0.8	-1	1	0.5
Q$1749	Q91YQ5	RPN1_MOUSE	Rpn1	Dolichyl-diphosphooligosaccharide--protein glycosyltransferase subunit 1	1	49.51	24	68544497	28877370	57129797	51639049	4385209	1690048	6076209	4426462	14.3	13.1	23.8	19.2	-2.4	0.0002	-1.2	0.3	-1.3	0.08	2	0.03	1.8	0.007	-1.1	0.5	9e-05
Q$1092	P48962	ADT1_MOUSE	Slc25a4	ADP/ATP translocase 1	1	39.26	13	65899765	27814498	64073877	60582425	4738025	2498524	4800832	6126349	16.1	20.1	16.8	22.6	-2.4	0.0006	-1	0.9	-1.1	0.9	2.3	0.0008	2.2	0.004	-1.1	0.9	8e-05
Q$856	P05202	AATM_MOUSE	Got2	Aspartate aminotransferase, mitochondrial	1	56.74	18	64788845	33803573	70798641	58292383	4836964	1355436	1839615	4810183	16.7	9	5.8	18.5	-1.9	0.01	1.1	0.5	-1.1	0.5	2.1	1e-06	1.7	0.02	-1.2	0.1	1e-05
Q$1202	P62827	RAN_MOUSE	Ran	GTP-binding nuclear protein Ran	1	36.57	10	64416145	33603915	61463173	56584179	1753853	7145429	7360396	1971168	6.1	47.5	26.8	7.8	-1.9	0.06	-1	0.8	-1.1	0.09	1.8	0.1	1.7	0.1	-1.1	0.8	0.003
Q$934	P16045	LEG1_MOUSE	Lgals1	Galectin-1	1	73.33	9	63474740	24056400	50073892	43636805	5956982	1851995	6643981	5455139	21	17.2	29.7	28	-2.6	0.01	-1.3	0.3	-1.5	0.1	2.1	0.06	1.8	0.05	-1.1	0.5	0.0008
Q$1391	Q3V3R1	C1TM_MOUSE	Mthfd1l	Monofunctional C1-tetrahydrofolate synthase, mitochondrial	1	50.15	29	63151703	43380416	64297319	56759238	3426411	1189834	5067988	3121706	12.1	6.1	17.6	12.3	-1.5	0.004	1	0.9	-1.1	0.5	1.5	0.05	1.3	0.02	-1.1	0.5	0.002
Q$528	E9Q616	E9Q616_MOUSE	Ahnak	Protein Ahnak	1	7.97	26	62798047	44794757	64982021	60143450	3197692	3682918	4948394	2484671	11.4	18.4	17	9.2	-1.4	0.04	1	0.8	-1	0.8	1.5	0.04	1.3	0.04	-1.1	0.8	0.006
Q$1179	P62242	RS8_MOUSE	Rps8	40S ribosomal protein S8	1	46.15	10	61335151	41767661	64385321	58862811	2054031	1663963	5080864	5150756	7.5	8.9	17.6	19.6	-1.5	0.0005	1	0.8	-1	0.8	1.5	0.01	1.4	0.05	-1.1	0.8	0.003
Q$140	B7FAU9	B7FAU9_MOUSE	Flna	Filamin, alpha	1	37.63	69	61262939	38850032	65801520	57967459	2787647	1439825	5215549	3312957	10.2	8.3	17.7	12.8	-1.6	0.0006	1.1	0.7	-1.1	0.7	1.7	0.02	1.5	0.004	-1.1	0.6	0.0003
Q$1248	P68373	TBA1C_MOUSE	Tuba1c	Tubulin alpha-1C chain	1	67.93	26	61140971	27462935	56153841	45517935	1740623	2505063	6232930	4109963	6.4	20.4	24.8	20.2	-2.2	2e-05	-1.1	0.5	-1.3	0.02	2	0.01	1.7	0.02	-1.2	0.3	0.0001
Q$870	P08071	TRFL_MOUSE	Ltf	Lactotransferrin	1	39.18	22	60993981	29816424	56386988	49601052	3072990	2227430	5227586	5212609	11.3	16.7	20.7	23.5	-2	0.0002	-1.1	0.6	-1.2	0.3	1.9	0.008	1.7	0.03	-1.1	0.6	0.0004
Q$1085	P47911	RL6_MOUSE	Rpl6	60S ribosomal protein L6	1	27.36	9	60457000	35774573	65306891	57534136	2999763	4399876	6428776	5825587	11.1	27.5	22	22.6	-1.7	0.01	1.1	0.8	-1.1	0.8	1.8	0.03	1.6	0.07	-1.1	0.8	0.004
Q$1376	Q3UHQ6-2	DOP2_MOUSE	Dopey	Isoform 2 of Protein dopey-2	0.9731	1.52	1	59790350	22347184	60951200	54143950	1897066	6539100	9536038	8302017	7.1	65.4	35	34.3	-2.7	0.02	1	0.9	-1.1	0.9	2.7	0.05	2.4	0.07	-1.1	0.9	0.005
Q$1043	P35441	TSP1_MOUSE	Thbs1	Thrombospondin-1	1	34.53	31	59520923	39371078	65308589	68205179	1982957	1562477	3633060	4881145	7.4	8.9	12.4	16	-1.5	0.0003	1.1	0.4	1.1	0.4	1.7	0.0009	1.7	0.01	1	0.6	5e-05
Q$1264	P70677	CASP3_MOUSE	Casp3	Caspase-3	1	17.33	5	59507691	49592485	60638833	57206465	2466494	1076683	1953683	4941485	9.3	4.9	7.2	19.3	-1.2	0.03	1	0.9	-1	0.9	1.2	0.007	1.2	0.6	-1.1	0.9	0.07
Q$1053	P36552	HEM6_MOUSE	Cpox	Coproporphyrinogen-III oxidase, mitochondrial	1	54.18	27	59341724	35949294	76567551	68929235	2615589	2522193	4551384	5858277	9.9	15.7	13.3	19	-1.7	0.001	1.3	0.03	1.2	0.3	2.1	0.0003	1.9	0.003	-1.1	0.3	2e-05
Q$913	P12787	COX5A_MOUSE	Cox5a	Cytochrome c oxidase subunit 5A, mitochondrial	1	48.63	10	58762221	37921150	60496396	53456132	2227116	2504446	1977857	3344017	8.5	14.8	7.3	14	-1.5	0.001	1	0.6	-1.1	0.4	1.6	0.0006	1.4	0.02	-1.1	0.3	4e-05
Q$1462	Q61765	K1H1_MOUSE	Krt31	Keratin, type I cuticular Ha1	1	37.5	18	58379999	95982518	63601337	80590920	1787771	26827144	4861273	20223369	6.8	62.5	17.1	56.1	1.6	0.8	1.1	0.8	1.4	0.8	-1.5	0.8	-1.2	0.8	1.3	0.8	0.4
Q$1455	Q61599	GDIR2_MOUSE	Arhgdib	Rho GDP-dissociation inhibitor 2	1	70	12	58316769	23042709	54182535	49458130	4604888	1788529	6793720	7271023	17.7	17.4	28	32.9	-2.5	0.0006	-1.1	0.9	-1.2	0.7	2.4	0.04	2.1	0.08	-1.1	0.9	0.002
Q$1314	Q02053	UBA1_MOUSE	Uba1	Ubiquitin-like modifier-activating enzyme 1	1	37.81	27	57386725	25988773	56992784	48062360	3380395	1125825	4266503	3726198	13.2	9.7	16.7	17.3	-2.2	0.0001	-1	0.9	-1.2	0.3	2.2	0.007	1.8	0.01	-1.2	0.3	1e-05
Q$1785	Q99JY9	ARP3_MOUSE	Actr3	Actin-related protein 3	1	60.29	19	57329665	30337517	51138952	46874202	3502524	1796767	4257815	3417553	13.7	13.2	18.6	16.3	-1.9	0.0008	-1.1	0.5	-1.2	0.2	1.7	0.01	1.5	0.01	-1.1	0.5	0.0003
Q$952	P17751	TPIS_MOUSE	Tpi1	Triosephosphate isomerase	1	59.53	20	56132567	25336039	48724666	39380914	7473721	2178986	5968421	5061075	29.8	19.2	27.4	28.7	-2.2	0.06	-1.2	0.5	-1.4	0.3	1.9	0.04	1.6	0.1	-1.2	0.5	0.007
Q$1155	P60843	IF4A1_MOUSE	Eif4a1	Eukaryotic initiation factor 4A-I	1	58.87	18	55473207	27022960	52916491	45364097	3392942	940261	6107330	5991331	13.7	7.8	25.8	29.5	-2.1	0.004	-1	0.7	-1.2	0.4	2	0.06	1.7	0.1	-1.2	0.6	0.002
Q$99	A6ZI46	A6ZI46_MOUSE	Aldoart1	Fructose-bisphosphate aldolase	1	41.05	20	55099311	20076201	46323335	38935715	4145646	1369962	5869440	5226879	16.8	15.3	28.3	30	-2.7	0.0003	-1.2	0.4	-1.4	0.1	2.3	0.05	1.9	0.08	-1.2	0.4	0.0004
Q$1125	P54071	IDHP_MOUSE	Idh2	Isocitrate dehydrogenase [NADP], mitochondrial	1	39.82	14	55064453	22074073	47048637	60068714	4324499	2627401	6152232	23397433	17.6	26.6	29.2	87.1	-2.5	0.001	-1.2	0.7	1.1	0.9	2.1	0.03	2.7	0.5	1.3	0.9	0.2
Q$1770	Q922R8	PDIA6_MOUSE	Pdia6	Protein disulfide-isomerase A6	1	42.73	18	54958541	29996648	52107794	46103504	2982506	2526957	4959306	2765042	12.1	18.8	21.3	13.4	-1.8	0.001	-1.1	0.6	-1.2	0.2	1.7	0.02	1.5	0.01	-1.1	0.5	0.0005
Q$742	P13864-2	DNMT1_MOUSE	Dnmt	Isoform 2 of DNA (cytosine-5)-methyltransferase 1	0.9804	1.8	2	54728870	54067113	53848965	52799379	3464828	5202027	4588030	3347233	14.2	21.5	19.1	14.2	-1	1	-1	1	-1	1	-1	1	-1	1	-1	1	1
Q$1070	P43430	MCPT8_MOUSE	Mcpt8	Mast cell protease 8	1	29.96	9	54479623	23854374	43993788	45708816	4260988	2624142	6050985	5936456	17.5	24.6	30.8	29	-2.3	0.002	-1.2	0.5	-1.2	0.5	1.8	0.06	1.9	0.05	1	0.8	0.003
Q$959	P19096	FAS_MOUSE	Fasn	Fatty acid synthase	1	24.36	35	54114801	30673447	51384112	50702437	3171301	808223	4717307	5570826	13.1	5.9	20.5	24.6	-1.8	0.007	-1.1	0.9	-1.1	0.9	1.7	0.05	1.7	0.09	-1	0.9	0.003
Q$1019	P29758	OAT_MOUSE	Oat	Ornithine aminotransferase, mitochondrial	1	57.63	19	52447019	33490195	49494058	42311989	2545753	1759695	4104618	2574860	10.9	11.7	18.5	13.6	-1.6	0.002	-1.1	0.6	-1.2	0.09	1.5	0.04	1.3	0.09	-1.2	0.3	0.001
Q$1152	P60335	PCBP1_MOUSE	Pcbp1	Poly(rC)-binding protein 1	1	53.93	13	52302103	34662233	47961633	45673706	2179696	1851446	3962445	4058935	9.3	11.9	18.5	19.9	-1.5	0.002	-1.1	0.6	-1.1	0.5	1.4	0.08	1.3	0.1	-1.1	0.7	0.008
Q$1193	P62702	RS4X_MOUSE	Rps4x	40S ribosomal protein S4, X isoform	1	47.53	16	52113895	29447315	56543611	48590824	4075911	534942	5333696	5130320	17.5	4.1	21.1	23.6	-1.8	0.03	1.1	0.8	-1.1	0.8	1.9	0.03	1.7	0.08	-1.2	0.7	0.002
Q$1109	P51150	RAB7A_MOUSE	Rab7a	Ras-related protein Rab-7a	1	41.55	8	51880752	26069661	84942964	53688841	9569618	5876743	10609581	6559447	41.2	50.4	27.9	27.3	-2	0.1	1.6	0.1	1	0.9	3.3	0.008	2.1	0.07	-1.6	0.1	0.002
Q$760	O08807	PRDX4_MOUSE	Prdx4	Peroxiredoxin-4	1	23.36	4	50283195	45761410	50970277	47682553	2939742	3896401	4396620	2766742	13.1	19	19.3	13	-1.1	0.9	1	1	-1.1	1	1.1	0.9	1	1	-1.1	1	0.7
Q$1949	Q9D883	U2AF1_MOUSE	U2af1	Splicing factor U2AF 35 kDa subunit	1	31.8	4	50178529	23002959	48093595	42553644	2815250	1672416	5731095	4123418	12.5	16.3	26.6	21.7	-2.2	0.0002	-1	0.8	-1.2	0.4	2.1	0.04	1.8	0.01	-1.1	0.7	0.0006
Q$955	P17918	PCNA_MOUSE	Pcna	Proliferating cell nuclear antigen	1	86.97	17	49802858	37058037	49269552	45911030	1178099	1077625	2890610	2185476	5.3	6.5	13.1	10.6	-1.3	0.0003	-1	0.9	-1.1	0.4	1.3	0.02	1.2	0.03	-1.1	0.6	0.001
Q$879	P08905	LYZ2_MOUSE	Lyz2	Lysozyme C-2	1	49.32	10	49497072	23054544	44445439	37610636	4900879	424152	3883888	3905167	22.1	4.1	19.5	23.2	-2.1	0.03	-1.1	0.4	-1.3	0.3	1.9	0.03	1.6	0.08	-1.2	0.4	0.0007
Q$1068	P43276	H15_MOUSE	Hist1h1b	Histone H1.5	1	24.66	12	49370650	27841527	72743048	50489900	4104083	1860523	4894202	4218380	18.6	14.9	15	18.7	-1.8	0.006	1.5	0.02	1	0.9	2.6	0.0002	1.8	0.006	-1.4	0.02	7e-06
Q$859	P06745	G6PI_MOUSE	Gpi	Glucose-6-phosphate isomerase	1	39.78	19	49206931	18491230	37171412	31639482	4258879	1040669	4775726	4623432	19.4	12.6	28.7	32.7	-2.7	0.009	-1.3	0.2	-1.6	0.09	2	0.08	1.7	0.1	-1.2	0.4	0.0005
Q$772	O35129	PHB2_MOUSE	Phb2	Prohibitin-2	1	37.79	11	49203122	27829793	50782433	47121005	3310627	2021874	4937225	4243850	15	16.2	21.7	20.1	-1.8	0.003	1	0.9	-1	0.9	1.8	0.01	1.7	0.01	-1.1	0.9	0.002
Q$1089	P48036	ANXA5_MOUSE	Anxa5	Annexin A5	1	63.64	18	49085703	23525665	46961008	42833183	4051345	1527739	3993796	2096638	18.5	14.5	19	10.9	-2.1	0.002	-1	0.7	-1.1	0.5	2	0.002	1.8	0.0004	-1.1	0.6	0.0001
Q$1400	Q5SQB0	Q5SQB0_MOUSE	Npm1	Nucleophosmin	1	38.26	13	48866546	23429612	48560374	43322023	1962813	2827632	6180580	4903336	9	27	28.5	25.3	-2.1	0.0005	-1	1	-1.1	0.7	2.1	0.03	1.8	0.03	-1.1	0.8	0.002
Q$1920	Q9D1A2	CNDP2_MOUSE	Cndp2	Cytosolic non-specific dipeptidase	1	57.47	20	48791539	23285619	47750317	39654749	1551940	2063069	5544502	4735006	7.1	19.8	26	26.7	-2.1	6e-05	-1	0.9	-1.2	0.3	2.1	0.02	1.7	0.05	-1.2	0.5	0.0009
Q$1968	Q9DBH5	LMAN2_MOUSE	Lman2	Vesicular integral-membrane protein VIP36	1	20.11	4	48654432	15671170	43976598	41323819	3880866	1282062	7312269	6227551	17.8	18.3	37.2	33.7	-3.1	0.0002	-1.1	0.8	-1.2	0.7	2.8	0.07	2.6	0.06	-1.1	0.8	0.002
Q$1392	Q497I4	KRT35_MOUSE	Krt35	Keratin, type I cuticular Ha5	1	34.73	16	48534429	40095580	43305110	44079148	1604581	6971595	5886208	6832258	7.4	38.9	30.4	34.7	-1.2	0.9	-1.1	0.9	-1.1	1	1.1	1	1.1	1	1	1	0.8
Q$1636	Q8BWT1	THIM_MOUSE	Acaa2	3-ketoacyl-CoA thiolase, mitochondrial	1	68.77	21	48480943	25222390	50792460	45687805	2987792	1775857	4424667	3145019	13.8	15.7	19.5	15.4	-1.9	0.0009	1	0.8	-1.1	0.8	2	0.003	1.8	0.002	-1.1	0.8	0.0001
Q$2108	Q9Z2T6	KRT85_MOUSE	Krt85	Keratin, type II cuticular Hb5	1	38.86	30	48416189	143660945	48378870	81649794	1991305	51354674	2755800	36674980	9.2	79.9	12.7	100.4	3	0.6	-1	1	1.7	0.8	-3	0.6	-1.8	0.8	1.7	0.8	0.2
Q$1691	Q8QZT1	THIL_MOUSE	Acat1	Acetyl-CoA acetyltransferase, mitochondrial	1	39.39	11	47548243	25423855	50642494	46698757	3685890	1200458	2469962	4292435	17.3	10.6	10.9	20.6	-1.9	0.002	1.1	0.8	-1	0.9	2	0.0001	1.8	0.02	-1.1	0.8	0.0001
Q$1270	P80318	TCPG_MOUSE	Cct3	T-complex protein 1 subunit gamma	1	41.1	18	47526704	44671498	48647516	43536518	1092284	2250874	1360148	2067706	5.1	11.3	6.3	10.6	-1.1	0.6	1	0.8	-1.1	0.5	1.1	0.5	-1	0.8	-1.1	0.4	0.2
Q$2005	Q9ESP1	SDF2L_MOUSE	Sdf2l1	Stromal cell-derived factor 2-like protein 1	1	51.58	5	47434257	27840546	48793731	44586330	2770457	1063579	2413833	3114142	13.1	8.5	11.1	15.6	-1.7	0.0008	1	0.8	-1.1	0.8	1.8	0.0003	1.6	0.004	-1.1	0.7	5e-05
Q$1213	P62908	RS3_MOUSE	Rps3	40S ribosomal protein S3	1	47.74	14	47093010	18703577	43897827	36980672	3891996	1376180	5202419	5481824	18.5	16.5	26.5	33.1	-2.5	0.0008	-1.1	0.6	-1.3	0.4	2.3	0.03	2	0.1	-1.2	0.6	0.001
Q$502	E9Q1T9	E9Q1T9_MOUSE	Cse1l	Exportin-2	0.9554	2.51	2	47047488	20677266	81758442	50776121	8415060	2173853	4012986	5096366	40	23.5	11	22.4	-2.3	0.06	1.7	0.02	1.1	0.7	4	6e-06	2.5	0.003	-1.6	0.006	8e-06
Q$815	O88342	WDR1_MOUSE	Wdr1	WD repeat-containing protein 1	1	22.77	11	46829259	20436597	41787515	35733433	3780555	1076262	4688643	4262361	18.1	11.8	25.1	26.7	-2.3	0.009	-1.1	0.6	-1.3	0.2	2	0.04	1.7	0.08	-1.2	0.6	0.0008
Q$820	O88569	ROA2_MOUSE	Hnrnpa2b1	Heterogeneous nuclear ribonucleoproteins A2/B1	1	51.27	19	46725657	26661105	47352863	44152774	1701099	1339342	4951509	4056963	8.1	11.2	23.4	20.5	-1.8	9e-05	1	0.9	-1.1	0.9	1.8	0.05	1.7	0.02	-1.1	0.9	0.001
Q$497	E9Q133	E9Q133_MOUSE	Cct3	T-complex protein 1 subunit gamma	1	40.63	15	46628928	44063829	47864718	42745662	1120414	2255222	1340229	1949335	5.4	11.4	6.3	10.2	-1.1	0.7	1	0.7	-1.1	0.5	1.1	0.6	-1	0.7	-1.1	0.3	0.2
Q$1866	Q9CR57	RL14_MOUSE	Rpl14	60S ribosomal protein L14	1	25.35	7	45885893	23634877	48096150	40157261	2271708	2516380	4801870	1859242	11.1	23.8	22.3	10.4	-1.9	0.001	1	0.7	-1.1	0.2	2	0.008	1.7	0.004	-1.2	0.3	0.0002
Q$933	P15864	H12_MOUSE	Hist1h1c	Histone H1.2	1	16.04	6	45740444	31287250	60019126	50448715	3157961	1757545	8356075	4274131	15.4	12.6	31.1	18.9	-1.5	0.02	1.3	0.4	1.1	0.6	1.9	0.1	1.6	0.02	-1.2	0.6	0.008
Q$1788	Q99KC8	VMA5A_MOUSE	Vwa5a	von Willebrand factor A domain-containing protein 5A	1	21.56	8	45678947	17751139	35984895	30974467	2352981	1735035	3867803	4336746	11.5	21.9	24	31.3	-2.6	7e-05	-1.3	0.1	-1.5	0.07	2	0.01	1.7	0.07	-1.2	0.4	0.0002
Q$932	P15532	NDKA_MOUSE	Nme1	Nucleoside diphosphate kinase A	1	57.24	11	44764249	24828855	41726945	37956778	2436288	4749817	4923903	4663063	12.2	42.8	26.4	27.5	-1.8	0.03	-1.1	0.8	-1.2	0.5	1.7	0.2	1.5	0.3	-1.1	0.8	0.02
Q$1414	Q60605-2	MYL6_MOUSE	Myl	Isoform Smooth muscle of Myosin light polypeptide 6	1	65.56	9	44721149	20835802	40925402	35205002	2935468	1825895	4244812	4087900	14.7	19.6	23.2	26	-2.1	0.0007	-1.1	0.6	-1.3	0.3	2	0.01	1.7	0.05	-1.2	0.6	0.0008
Q$1897	Q9CZ13	QCR1_MOUSE	Uqcrc1	Cytochrome b-c1 complex subunit 1, mitochondrial	1	42.08	17	44293042	27439321	46515561	38930054	7763657	4338899	6337007	4580302	39.2	35.4	30.5	26.3	-1.6	0.4	1.1	0.8	-1.1	0.8	1.7	0.2	1.4	0.4	-1.2	0.7	0.1
Q$490	E9Q0F0	E9Q0F0_MOUSE	Krt78	Protein Krt78	1	2.43	4	43970365	23569341	38728229	39880200	22294923	12018457	15535810	17468067	113.4	114	89.7	97.9	-1.9	1	-1.1	1	-1.1	1	1.6	1	1.7	1	1	1	0.8
Q$1184	P62281	RS11_MOUSE	Rps11	40S ribosomal protein S11	1	25.32	3	43716845	21468701	78688373	50206864	9633389	5007396	9782840	5362684	49.3	52.2	27.8	23.9	-2	0.1	1.8	0.1	1.1	0.6	3.7	0.005	2.3	0.02	-1.6	0.1	0.0009
Q$1413	Q60605	MYL6_MOUSE	Myl6	Myosin light polypeptide 6	1	47.68	7	43485129	19437123	38957498	33623292	2879197	1906971	4557088	3852627	14.8	21.9	26.2	25.6	-2.2	0.0007	-1.1	0.6	-1.3	0.2	2	0.02	1.7	0.04	-1.2	0.6	0.0009
Q$1980	Q9DCD0	6PGD_MOUSE	Pgd	6-phosphogluconate dehydrogenase, decarboxylating	1	54.87	21	43379724	18164351	36937034	29347859	2474188	1468673	3597680	3772387	12.8	18.1	21.8	28.7	-2.4	0.0001	-1.2	0.3	-1.5	0.06	2	0.006	1.6	0.07	-1.3	0.3	0.0001
Q$1617	Q8BLF1	NCEH1_MOUSE	Nceh1	Neutral cholesterol ester hydrolase 1	1	16.91	3	43338107	17381085	38673920	31480148	2086113	1692936	4689895	3407187	10.8	21.8	27.1	24.2	-2.5	7e-05	-1.1	0.4	-1.4	0.05	2.2	0.01	1.8	0.02	-1.2	0.4	0.0002
Q$1528	Q6P4T2	U520_MOUSE	Snrnp200	U5 small nuclear ribonucleoprotein 200 kDa helicase	1	8.75	14	42751888	20923163	41506390	36169650	1865842	1724885	5951155	3731827	9.8	18.4	32.1	23.1	-2	0.0002	-1	0.8	-1.2	0.4	2	0.09	1.7	0.03	-1.1	0.7	0.003
Q$1240	P67778	PHB_MOUSE	Phb	Prohibitin	1	65.44	18	42741898	22810818	46586054	43338514	3529368	1121029	2722663	4659436	18.5	11	13.1	24	-1.9	0.02	1.1	0.8	1	0.9	2	0.0002	1.9	0.04	-1.1	0.8	0.0004
Q$1107	P50543	S10AB_MOUSE	S100a11	Protein S100-A11	1	77.55	9	42403925	23548573	39311751	33695603	3840761	711222	3440293	2199640	20.3	6.8	19.6	14.6	-1.8	0.04	-1.1	0.6	-1.3	0.2	1.7	0.04	1.4	0.01	-1.2	0.4	0.001
Q$894	P10649	GSTM1_MOUSE	Gstm1	Glutathione S-transferase Mu 1	1	55.05	13	42330403	31420425	42058274	39888435	3873874	918143	3260084	3715071	20.5	6.5	17.3	20.8	-1.3	0.2	-1	1	-1.1	1	1.3	0.2	1.3	0.3	-1.1	1	0.09
Q$997	P26443	DHE3_MOUSE	Glud1	Glutamate dehydrogenase 1, mitochondrial	1	42.47	20	42243274	22105135	38310580	35560505	3807865	320379	2980957	2887219	20.2	3.2	17.4	18.2	-1.9	0.03	-1.1	0.7	-1.2	0.5	1.7	0.03	1.6	0.04	-1.1	0.7	0.0007
Q$1910	Q9D0K2	SCOT1_MOUSE	Oxct1	Succinyl-CoA:3-ketoacid coenzyme A transferase 1, mitochondrial	1	33.65	12	41901827	26262949	37677855	33420300	1193369	611152	2664975	3167792	6.4	5.2	15.8	21.2	-1.6	2e-05	-1.1	0.3	-1.3	0.1	1.4	0.06	1.3	0.2	-1.1	0.3	0.0008
Q$908	Q542I8	Q542I8_MOUSE	Itgb2	Integrin beta	1	50.13	29	41714160	22390984	39099659	35414746	2675253	906877	3719652	2534141	14.3	9.1	21.3	16	-1.9	0.0008	-1.1	0.7	-1.2	0.3	1.7	0.04	1.6	0.006	-1.1	0.7	0.0005
Q$1268	P80316	TCPE_MOUSE	Cct5	T-complex protein 1 subunit epsilon	1	42.88	14	41593782	21775115	30114502	40856628	6639925	3150567	3132045	11461918	35.7	32.4	23.3	62.7	-1.9	0.2	-1.4	0.5	-1	1	1.4	0.4	1.9	0.5	1.4	0.7	0.2
Q$984	P24527	LKHA4_MOUSE	Lta4h	Leukotriene A-4 hydrolase	1	27.66	12	41541997	17705230	34456439	30938369	2664627	1036022	4129157	3878140	14.3	13.1	26.8	28	-2.3	0.0002	-1.2	0.3	-1.3	0.2	1.9	0.07	1.7	0.1	-1.1	0.6	0.0006
Q$982	P24270	CATA_MOUSE	Cat	Catalase	1	51.23	25	41412061	21814918	37137665	34096444	2169280	1385631	3298218	3251068	11.7	14.2	19.9	21.3	-1.9	0.0004	-1.1	0.5	-1.2	0.3	1.7	0.01	1.6	0.03	-1.1	0.5	0.0006
Q$1305	P99027	RLA2_MOUSE	Rplp2	60S acidic ribosomal protein P2	1	80.87	11	41230415	22696525	41973508	36551777	2499602	1071635	3919359	4528483	13.6	10.6	20.9	27.7	-1.8	0.0008	1	0.9	-1.1	0.8	1.8	0.03	1.6	0.1	-1.1	0.8	0.003
Q$1058	P40124	CAP1_MOUSE	Cap1	Adenylyl cyclase-associated protein 1	1	49.79	22	40877754	23724071	43831508	38044591	2874231	451185	3739805	4275218	15.7	4.3	19.1	25.1	-1.7	0.02	1.1	0.8	-1.1	0.8	1.8	0.03	1.6	0.1	-1.2	0.7	0.002
Q$1324	Q05816	FABP5_MOUSE	Fabp5	Fatty acid-binding protein, epidermal	1	77.78	12	40583010	16128606	38008534	30721270	5070990	1221268	4420694	4676327	27.9	16.9	26	34	-2.5	0.04	-1.1	0.7	-1.3	0.5	2.4	0.04	1.9	0.1	-1.2	0.5	0.003
Q$1771	Q922U2	K2C5_MOUSE	Krt5	Keratin, type II cytoskeletal 5	1	16.9	7	40133165	39644228	34714926	34650444	2648193	3503265	1083489	2223583	14.8	19.8	7	14.3	-1	1	-1.2	0.5	-1.2	0.6	-1.1	0.7	-1.1	0.7	-1	1	0.3
Q$830	O89053	COR1A_MOUSE	Coro1a	Coronin-1A	1	42.52	14	39814354	20137061	36500950	33720708	2442172	1497365	3121554	3619734	13.7	16.6	19.1	24	-2	0.0008	-1.1	0.7	-1.2	0.5	1.8	0.007	1.7	0.03	-1.1	0.7	0.0007
Q$1598	Q8BH61	F13A_MOUSE	F13a1	Coagulation factor XIII A chain	1	33.33	17	39394377	19390709	35399963	28351904	3788698	1078884	3222847	2826288	21.5	12.4	20.4	22.3	-2	0.02	-1.1	0.4	-1.4	0.1	1.8	0.009	1.5	0.07	-1.2	0.3	0.001
Q$1302	P97861	KRT86_MOUSE	Krt86	Keratin, type II cuticular Hb6	1	7.61	3	39250921	36438842	40227137	39457395	7772731	7217773	7298464	6445219	44.3	44.3	40.6	36.5	-1.1	1	1	1	1	1	1.1	1	1.1	1	-1	1	1
Q$1682	Q8K2B3	DHSA_MOUSE	Sdha	Succinate dehydrogenase [ubiquinone] flavoprotein subunit, mitochondrial	1	41.11	17	39080782	19916527	37557816	32177366	2854278	880848	2738521	2966419	16.3	9.9	16.3	20.6	-2	0.01	-1	0.7	-1.2	0.3	1.9	0.01	1.6	0.05	-1.2	0.4	0.0002
Q$1935	Q9D3D9	ATPD_MOUSE	Atp5d	ATP synthase subunit delta, mitochondrial	1	58.33	5	38825532	20846805	41964625	37734124	3285285	952876	3253389	2796879	18.9	10.2	17.3	16.6	-1.9	0.02	1.1	0.8	-1	0.8	2	0.01	1.8	0.003	-1.1	0.7	0.0002
Q$868	P08003	PDIA4_MOUSE	Pdia4	Protein disulfide-isomerase A4	1	54.7	25	38517716	17518681	32417480	28183699	2543763	1093461	2298317	3170660	14.8	14	15.9	25.2	-2.2	0.0004	-1.2	0.2	-1.4	0.1	1.9	0.002	1.6	0.05	-1.2	0.3	0.0001
Q$1954	Q9D8N0	EF1G_MOUSE	Eef1g	Elongation factor 1-gamma	1	30.66	11	38465133	24347997	37967227	34972088	1931426	800428	2652089	2766706	11.2	7.4	15.6	17.7	-1.6	0.0009	-1	0.9	-1.1	0.7	1.6	0.03	1.4	0.06	-1.1	0.7	0.001
Q$1804	Q99LB4	Q99LB4_MOUSE	Capg	Capping protein (Actin filament), gelsolin-like	1	50.43	11	38116200	15606332	33944579	28496928	3214501	815776	4111382	2874722	18.9	11.7	27.1	22.6	-2.4	0.009	-1.1	0.5	-1.3	0.2	2.2	0.04	1.8	0.04	-1.2	0.5	0.0004
Q$1510	Q64727	VINC_MOUSE	Vcl	Vinculin	1	21.2	13	38107986	18227104	34992144	28681694	1501681	2052988	3199229	2518844	8.8	25.2	20.4	19.6	-2.1	0.0003	-1.1	0.4	-1.3	0.05	1.9	0.01	1.6	0.05	-1.2	0.3	0.0001
Q$917	P14069	S10A6_MOUSE	S100a6	Protein S100-A6	1	47.19	4	37933740	17618340	32280280	27355590	3838460	1593625	4146037	3708970	22.6	20.2	28.7	30.3	-2.2	0.007	-1.2	0.6	-1.4	0.2	1.8	0.05	1.6	0.2	-1.2	0.6	0.006
Q$1623	Q8BMS1	ECHA_MOUSE	Hadha	Trifunctional enzyme subunit alpha, mitochondrial	1	42.33	22	37782690	25027482	43034407	37365469	2038524	932314	3710064	2542810	12.1	8.3	19.3	15.2	-1.5	0.003	1.1	0.6	-1	0.9	1.7	0.03	1.5	0.009	-1.2	0.6	0.0009
Q$2098	Q9Z1Q5	CLIC1_MOUSE	Clic1	Chloride intracellular channel protein 1	1	59.75	12	37679947	24228968	37259925	34634718	3441664	3362357	3296372	3622502	20.4	31	19.8	23.4	-1.6	0.1	-1	0.9	-1.1	0.9	1.5	0.1	1.4	0.2	-1.1	0.9	0.05
Q$1579	Q80YQ1	Q80YQ1_MOUSE	Thbs1	Thrombospondin 1	1	33.73	30	37634523	29827358	42821689	47556979	398170	213087	3181624	4221967	2.4	1.6	16.6	19.9	-1.3	8e-07	1.1	0.3	1.3	0.2	1.4	0.07	1.6	0.07	1.1	0.4	0.002
Q$1428	Q61001	LAMA5_MOUSE	Lama5	Laminin subunit alpha-5	0.901	0.38	1	37282600	14754910	32282700	27989200	1876286	1278807	4260194	3917847	11.3	19.4	29.5	31.3	-2.5	5e-05	-1.2	0.5	-1.3	0.2	2.2	0.06	1.9	0.06	-1.2	0.5	0.0007
Q$1806	Q99LC3	NDUAA_MOUSE	Ndufa10	NADH dehydrogenase [ubiquinone] 1 alpha subcomplex subunit 10, mitochondrial	1	26.76	6	37251633	44605409	41544934	39151961	2468399	3029228	3686836	1961385	14.8	15.2	19.8	11.2	1.2	0.5	1.1	0.8	1.1	0.9	-1.1	0.9	-1.1	0.6	-1.1	0.9	0.3
Q$1233	P63242	IF5A1_MOUSE	Eif5a	Eukaryotic translation initiation factor 5A-1	1	66.23	16	37227082	19015866	36425665	32732740	1599844	1073321	3597189	2726651	9.6	12.6	22.1	18.6	-2	8e-05	-1	0.8	-1.1	0.5	1.9	0.03	1.7	0.008	-1.1	0.7	0.0002
Q$1822	Q99P88	NU155_MOUSE	Nup155	Nuclear pore complex protein Nup155	0.9978	2.23	2	36893089	24517000	32251298	33810032	4666605	6276889	7025600	4757669	28.3	57.2	48.7	31.5	-1.5	0.6	-1.1	0.9	-1.1	0.9	1.3	0.9	1.4	0.8	1	0.9	0.5
Q$1307	Q00612	G6PD1_MOUSE	G6pdx	Glucose-6-phosphate 1-dehydrogenase X	1	29.32	11	36862126	17552854	39285041	34748288	2625271	2341437	4782000	3547173	15.9	29.8	27.2	22.8	-2.1	0.003	1.1	0.9	-1.1	0.9	2.2	0.02	2	0.02	-1.1	0.8	0.002
Q$444	E0CZ27	E0CZ27_MOUSE	H3f3a	Histone H3 (Fragment)	1	50.42	7	36421253	18809082	57178550	38612318	6295595	3278121	4587242	1517619	38.7	39	17.9	8.8	-1.9	0.08	1.6	0.08	1.1	0.8	3	0.0008	2.1	0.003	-1.5	0.02	0.0001
Q$1678	Q8K1B8	URP2_MOUSE	Fermt3	Fermitin family homolog 3	1	37.59	18	36273827	21643823	36086147	34656844	2131172	722166	3161295	3866995	13.1	7.5	19.6	24.9	-1.7	0.001	-1	1	-1	1	1.7	0.04	1.6	0.1	-1	1	0.004
Q$1266	P80313	TCPH_MOUSE	Cct7	T-complex protein 1 subunit eta	1	50.55	18	36083102	29479807	42452181	43839292	1908592	945650	2514750	3248131	11.8	7.2	13.2	16.6	-1.2	0.06	1.2	0.2	1.2	0.2	1.4	0.008	1.5	0.05	1	0.7	0.002
Q$983	P24369	PPIB_MOUSE	Ppib	Peptidyl-prolyl cis-trans isomerase B	1	51.85	11	36055830	15423847	32124672	28590261	1868243	1220086	3312791	2607366	11.6	17.7	23.1	20.4	-2.3	9e-05	-1.1	0.6	-1.3	0.1	2.1	0.007	1.9	0.007	-1.1	0.6	9e-05
Q$1181	P62259	1433E_MOUSE	Ywhae	14-3-3 protein epsilon	1	38.82	8	35943774	23510503	36557055	33763085	1008933	1991320	3608627	3573871	6.3	18.9	22.1	23.7	-1.5	0.003	1	0.9	-1.1	0.9	1.6	0.06	1.4	0.1	-1.1	0.9	0.01
Q$1165	P61358	RL27_MOUSE	Rpl27	60S ribosomal protein L27	1	24.26	5	35931516	25135456	38575497	33885867	1282464	1567465	3231544	2129219	8	13.9	18.7	14.1	-1.4	0.004	1.1	0.7	-1.1	0.7	1.5	0.03	1.3	0.04	-1.1	0.6	0.003
Q$2023	Q9JKF1	IQGA1_MOUSE	Iqgap1	Ras GTPase-activating-like protein IQGAP1	1	31.44	28	35311427	20927949	34258720	30950454	1790764	583400	2208201	3113216	11.3	6.2	14.4	22.5	-1.7	0.0004	-1	0.7	-1.1	0.6	1.6	0.01	1.5	0.1	-1.1	0.7	0.0008
Q$920	P14148	RL7_MOUSE	Rpl7	60S ribosomal protein L7	1	41.48	13	35187462	16524406	33685504	28410785	2799950	1029415	3444741	2547239	17.8	13.9	22.9	20	-2.1	0.001	-1	0.7	-1.2	0.3	2	0.02	1.7	0.01	-1.2	0.4	0.0005
Q$1784	Q99JY0	ECHB_MOUSE	Hadhb	Trifunctional enzyme subunit beta, mitochondrial	1	41.47	13	35119005	18523823	34078837	30549329	4009707	1758838	3932208	3259782	25.5	21.2	25.8	23.9	-1.9	0.03	-1	0.9	-1.1	0.8	1.8	0.03	1.6	0.05	-1.1	0.8	0.01
Q$1180	P62245	RS15A_MOUSE	Rps15a	40S ribosomal protein S15a	1	46.15	6	34671234	18177629	34011170	28299904	2521698	1304544	3684194	3669630	16.3	16	24.2	29	-1.9	0.002	-1	0.9	-1.2	0.5	1.9	0.02	1.6	0.1	-1.2	0.5	0.004
Q$1967	Q9DBG6	RPN2_MOUSE	Rpn2	Dolichyl-diphosphooligosaccharide--protein glycosyltransferase subunit 2	1	43.26	20	34216082	18468171	34083389	31500007	2354752	803681	2963914	2613856	15.4	9.7	19.4	18.6	-1.9	0.001	-1	1	-1.1	0.8	1.8	0.02	1.7	0.02	-1.1	0.8	0.0005
Q$1005	P27659	RL3_MOUSE	Rpl3	60S ribosomal protein L3	1	21.84	9	33965896	15823087	42935487	34799125	2970016	1220330	5231514	3171370	19.6	17.2	27.2	20.4	-2.1	0.003	1.3	0.4	1	0.9	2.7	0.02	2.2	0.003	-1.2	0.4	0.0004
Q$2030	Q9QUM0	ITA2B_MOUSE	Itga2b	Integrin alpha-IIb	1	34.37	21	33846930	24466246	38288993	36081600	1560528	1744724	2826929	3261276	10.3	15.9	16.5	20.2	-1.4	0.02	1.1	0.5	1.1	0.8	1.6	0.02	1.5	0.05	-1.1	0.8	0.006
Q$1008	P28293	CATG_MOUSE	Ctsg	Cathepsin G	1	56.32	15	33810476	17610400	30680014	27728217	2794197	1268836	2100810	3937404	18.5	16.1	15.3	31.8	-1.9	0.004	-1.1	0.6	-1.2	0.6	1.7	0.004	1.6	0.2	-1.1	0.6	0.004
Q$1022	P30681	HMGB2_MOUSE	Hmgb2	High mobility group protein B2	1	32.86	9	33785670	16063502	30126771	27515284	515420	1751508	3113340	2365387	3.4	24.4	23.1	19.2	-2.1	0.002	-1.1	0.5	-1.2	0.2	1.9	0.02	1.7	0.02	-1.1	0.5	0.0002
Q$1533	Q6PB66	LPPRC_MOUSE	Lrpprc	Leucine-rich PPR motif-containing protein, mitochondrial	1	10.99	12	33732665	19956020	53480036	35614129	4388519	3198197	3603293	4160701	29.1	35.8	15.1	26.1	-1.7	0.07	1.6	0.04	1.1	0.8	2.7	0.0007	1.8	0.05	-1.5	0.05	0.0002
Q$1223	P63028	TCTP_MOUSE	Tpt1	Translationally-controlled tumor protein	1	51.74	8	33558935	27132872	34330780	32201497	961383	856311	1599134	2350677	6.4	7.1	10.4	16.3	-1.2	0.006	1	0.9	-1	0.9	1.3	0.02	1.2	0.3	-1.1	0.9	0.02
Q$694	Q8R081	HNRPL_MOUSE	Hnrnpl	Heterogeneous nuclear ribonucleoprotein L	1	61.26	20	33512558	17642478	32656664	28256709	2102831	351967	2479907	3078510	14	4.5	17	24.4	-1.9	0.008	-1	0.8	-1.2	0.5	1.9	0.02	1.6	0.1	-1.2	0.5	0.0005
Q$2112	Q9Z2X1	HNRPF_MOUSE	Hnrnpf	Heterogeneous nuclear ribonucleoprotein F	1	40.72	14	33086660	15004890	30023141	25784894	2693266	858993	3952461	3044116	18.2	12.8	29.4	26.4	-2.2	0.01	-1.1	0.7	-1.3	0.3	2	0.08	1.7	0.08	-1.2	0.7	0.002
Q$1676	Q8K0Y2	KT33A_MOUSE	Krt33a	Keratin, type I cuticular Ha3-I	1	29.21	10	32837415	64439617	38607169	50539691	1742275	17028229	2357596	10984148	11.9	59.1	13.7	48.6	2	0.5	1.2	0.4	1.5	0.6	-1.7	0.6	-1.3	0.6	1.3	0.6	0.2
Q$1050	P35979	RL12_MOUSE	Rpl12	60S ribosomal protein L12	1	54.55	8	32736591	15857478	40714842	28247392	2622662	639252	2601163	3312507	17.9	9	14.3	26.2	-2.1	0.01	1.2	0.1	-1.2	0.3	2.6	0.003	1.8	0.07	-1.4	0.07	3e-05
Q$1244	P68040	GBLP_MOUSE	Gnb2l1	Guanine nucleotide-binding protein subunit beta-2-like 1	1	61.51	14	32381941	13367911	32129958	27112309	2784567	860949	3789109	2642528	19.2	14.4	26.4	21.8	-2.4	0.008	-1	1	-1.2	0.5	2.4	0.03	2	0.007	-1.2	0.5	0.0004
Q$1595	Q8BGZ7	K2C75_MOUSE	Krt75	Keratin, type II cytoskeletal 75	1	5.63	4	32377718	36337473	30189212	30955838	1463623	2773518	1803027	1971186	10.1	17.1	13.4	14.2	1.1	0.7	-1.1	0.8	-1	0.8	-1.2	0.5	-1.2	0.6	1	0.8	0.2
Q$1035	P34884	MIF_MOUSE	Mif	Macrophage migration inhibitory factor	1	83.48	5	32127471	13637125	26169301	22760994	3161137	1417974	3234259	3158306	22	23.3	27.6	31	-2.4	0.004	-1.2	0.4	-1.4	0.2	1.9	0.04	1.7	0.1	-1.1	0.5	0.003
Q$1563	Q7TMM9	TBB2A_MOUSE	Tubb2a	Tubulin beta-2A chain	1	18.2	8	31999012	16045532	32766341	26894733	1294488	1665407	4184318	2652392	9	23.2	28.6	22.1	-2	0.0004	1	0.9	-1.2	0.3	2	0.03	1.7	0.03	-1.2	0.5	0.002
Q$849	P04104	K2C1_MOUSE	Krt1	Keratin, type II cytoskeletal 1	1	3.77	3	31830101	18481316	25314566	25493577	8955974	5837308	6156831	8353013	62.9	70.6	54.4	73.3	-1.7	0.8	-1.3	0.9	-1.2	0.9	1.4	0.9	1.4	0.9	1	1	0.7
Q$1735	Q91VI7	RINI_MOUSE	Rnh1	Ribonuclease inhibitor	1	65.35	25	31819655	17089302	30647425	26015121	2029216	813523	3076231	3344168	14.3	10.6	22.4	28.7	-1.9	0.0009	-1	0.8	-1.2	0.4	1.8	0.05	1.5	0.2	-1.2	0.6	0.003
Q$1422	Q60864	STIP1_MOUSE	Stip1	Stress-induced-phosphoprotein 1	1	30.76	13	31768210	18230932	29124763	27064181	1124620	1532163	1692345	2404546	7.9	18.8	13	19.9	-1.7	0.0006	-1.1	0.4	-1.2	0.3	1.6	0.007	1.5	0.06	-1.1	0.5	0.0003
Q$106	B0V2N7	B0V2N7_MOUSE	Anxa2	Annexin (Fragment)	1	75.51	12	31689689	12497264	26229632	22888444	3131299	598625	2837115	1362958	22.1	10.7	24.2	13.3	-2.5	0.02	-1.2	0.4	-1.4	0.1	2.1	0.03	1.8	0.0007	-1.1	0.4	0.0001
Q$1067	P43275	H11_MOUSE	Hist1h1a	Histone H1.1	1	16.9	7	31659914	15336978	46587444	37373602	1955936	1003025	5150259	2845175	13.8	14.6	24.7	17	-2.1	0.0004	1.5	0.08	1.2	0.3	3	0.01	2.4	0.0004	-1.2	0.3	3e-05
Q$1518	Q6IFX2	K1C42_MOUSE	Krt42	Keratin, type I cytoskeletal 42	1	13.27	7	31623146	21731540	30371905	29063411	1842662	3293395	3408999	2034208	13	33.9	25.1	15.7	-1.5	0.2	-1	0.9	-1.1	0.8	1.4	0.4	1.3	0.4	-1	0.9	0.09
Q$1010	P28798	GRN_MOUSE	Grn	Granulins	1	16.98	6	31442396	11687276	30007515	26974099	2919235	1364131	3708006	3836314	20.8	26.1	27.6	31.8	-2.7	0.002	-1	0.8	-1.2	0.8	2.6	0.008	2.3	0.02	-1.1	0.8	0.001
Q$2029	Q9QUI0	RHOA_MOUSE	Rhoa	Transforming protein RhoA	1	60.1	10	31358128	16715621	30663921	27468494	2168556	682649	1914378	2821619	15.5	9.1	14	23	-1.9	0.008	-1	0.8	-1.1	0.7	1.8	0.0008	1.6	0.07	-1.1	0.7	0.0004
Q$1854	Q9CQN1	TRAP1_MOUSE	Trap1	Heat shock protein 75 kDa, mitochondrial	1	26.35	10	31082880	22924194	31638529	28962703	3549760	1458030	3180288	3303588	25.5	14.2	22.5	25.5	-1.4	0.3	1	0.9	-1.1	0.9	1.4	0.2	1.3	0.4	-1.1	0.9	0.2
Q$1670	Q8JZQ2	AFG32_MOUSE	Afg3l2	AFG3-like protein 2	0.9932	6.48	3	30856596	20102393	15301007	10674972	5137777	3817446	3082639	2532365	37.2	42.5	45	53	-1.5	0.3	-2	0.1	-2.9	0.05	-1.3	0.5	-1.9	0.3	-1.4	0.5	0.01
Q$972	P21107-2	TPM3_MOUSE	Tpm	Isoform 2 of Tropomyosin alpha-3 chain	1	56.45	20	30838217	16609755	32004394	29179099	2889243	796121	3769566	3125507	20.9	10.7	26.3	24	-1.9	0.04	1	0.9	-1.1	0.9	1.9	0.07	1.8	0.07	-1.1	0.9	0.005
Q$1722	Q8VDW0	DX39A_MOUSE	Ddx39a	ATP-dependent RNA helicase DDX39A	1	43.56	14	30703043	14075563	29730541	25705270	1263425	1312657	3713207	2483407	9.2	20.9	27.9	21.6	-2.2	0.0001	-1	0.8	-1.2	0.3	2.1	0.02	1.8	0.02	-1.2	0.6	0.0006
Q$1215	P62918	RL8_MOUSE	Rpl8	60S ribosomal protein L8	1	40.08	12	30685981	16793774	31455945	27472440	2134776	1407990	3178346	4107973	15.6	18.7	22.6	33.4	-1.8	0.004	1	0.8	-1.1	0.8	1.9	0.01	1.6	0.1	-1.1	0.8	0.009
Q$985	P24547	IMDH2_MOUSE	Impdh2	Inosine-5'-monophosphate dehydrogenase 2	1	25.1	8	30677438	15677620	33252789	28639688	1846986	1142260	2339940	2407272	13.5	16.3	15.7	18.8	-2	0.0007	1.1	0.7	-1.1	0.7	2.1	0.0007	1.8	0.005	-1.2	0.5	6e-05
Q$1267	P80314	TCPB_MOUSE	Cct2	T-complex protein 1 subunit beta	1	51.4	18	30510187	15465175	30847743	28196432	3603882	1809443	3437064	2589355	26.4	26.2	24.9	20.5	-2	0.02	1	0.9	-1.1	0.9	2	0.02	1.8	0.02	-1.1	0.9	0.006
Q$1383	Q3UP87	ELNE_MOUSE	Elane	Neutrophil elastase	1	34.34	10	30509317	15004698	27546856	22927874	2418050	1066859	2687552	2581122	17.7	15.9	21.8	25.2	-2	0.002	-1.1	0.4	-1.3	0.2	1.8	0.01	1.5	0.08	-1.2	0.4	0.001
Q$1316	Q02819	NUCB1_MOUSE	Nucb1	Nucleobindin-1	1	26.14	10	30488521	14929987	29334165	25846002	2587760	2305612	3726098	1884262	19	34.5	28.4	16.3	-2	0.01	-1	0.8	-1.2	0.5	2	0.04	1.7	0.03	-1.1	0.7	0.004
Q$968	P20108	PRDX3_MOUSE	Prdx3	Thioredoxin-dependent peroxide reductase, mitochondrial	1	33.46	10	30447836	12548680	32282330	27610824	3503385	1066279	3648523	2462930	25.7	19	25.3	19.9	-2.4	0.02	1.1	0.8	-1.1	0.8	2.6	0.02	2.2	0.003	-1.2	0.7	0.0006
Q$1249	P68433	H31_MOUSE	Hist1h3a	Histone H3.1	1	35.29	4	30106170	17381327	46738830	32410037	4450059	2642625	4798722	1789478	33.1	34	23	12.3	-1.7	0.1	1.6	0.1	1.1	0.6	2.7	0.004	1.9	0.008	-1.4	0.09	0.0004
Q$1185	P62301	RS13_MOUSE	Rps13	40S ribosomal protein S13	1	31.79	5	29843062	21246660	30988875	25974144	1049645	1301052	2903944	2056631	7.9	13.7	21	17.7	-1.4	0.005	1	0.7	-1.1	0.3	1.5	0.08	1.2	0.3	-1.2	0.4	0.01
Q$2017	Q9JIK5	DDX21_MOUSE	Ddx21	Nucleolar RNA helicase 2	1	20.8	14	29828507	22083472	29979840	29052503	1514638	646363	1497047	2490124	11.4	6.5	11.2	19.2	-1.4	0.008	1	1	-1	1	1.4	0.008	1.3	0.2	-1	1	0.01
Q$977	P22437	PGH1_MOUSE	Ptgs1	Prostaglandin G/H synthase 1	1	16.78	6	29798025	15450545	28606592	26724847	1607086	1351418	2847428	2731069	12.1	19.6	22.3	22.9	-1.9	0.0008	-1	0.9	-1.1	0.7	1.9	0.02	1.7	0.02	-1.1	0.9	0.001
Q$1624	Q8BN21-2	VRK2_MOUSE	Vrk	Isoform 2 of Serine/threonine-protein kinase VRK2	0.9964	2.86	1	29330050	33277300	28773450	28597200	3468745	3800235	3356744	2971627	26.4	25.5	26.1	23.2	1.1	0.9	-1	1	-1	1	-1.2	0.9	-1.2	0.9	-1	1	0.7
Q$1330	Q07797	LG3BP_MOUSE	Lgals3bp	Galectin-3-binding protein	1	17.33	6	29254927	11705259	19658518	18653046	1672192	5008506	6379752	4230113	12.8	95.7	72.6	50.7	-2.5	0.06	-1.5	0.6	-1.6	0.2	1.7	0.7	1.6	0.7	-1.1	0.9	0.1
Q$1052	P36423	THAS_MOUSE	Tbxas1	Thromboxane-A synthase	1	6.57	3	29138603	28210291	28794025	27635436	711446	2058809	1583416	865047	5.5	16.3	12.3	7	-1	1	-1	1	-1.1	0.8	1	1	-1	1	-1	1	0.9
Q$904	P11438	LAMP1_MOUSE	Lamp1	Lysosome-associated membrane glycoprotein 1	1	8.37	3	29084625	12644499	24554527	20983132	1261818	1335525	2471100	2170740	9.7	23.6	22.5	23.1	-2.3	0.0001	-1.2	0.3	-1.4	0.04	1.9	0.01	1.7	0.04	-1.2	0.3	0.0001
Q$1326	Q06185	ATP5I_MOUSE	Atp5i	ATP synthase subunit e, mitochondrial	1	42.25	3	29055425	12569941	30215006	26329411	2708460	1358457	2638652	682860	20.8	24.2	19.5	5.8	-2.3	0.002	1	0.8	-1.1	0.6	2.4	0.002	2.1	0.0001	-1.1	0.5	5e-05
Q$1384	Q3UV11	Q3UV11_MOUSE	Krt6b	Keratin, type II cytoskeletal 6B	1	2.17	2	28680642	31680009	25746574	26544560	1322427	2433132	1345967	1720502	10.3	17.2	11.7	14.5	1.1	0.7	-1.1	0.5	-1.1	0.7	-1.2	0.3	-1.2	0.5	1	0.7	0.1
Q$1490	Q62465	VAT1_MOUSE	Vat1	Synaptic vesicle membrane protein VAT-1 homolog	1	27.34	8	28471432	12284992	25681730	21632045	1059126	1091495	3286748	2168217	8.3	19.9	28.6	22.4	-2.3	3e-05	-1.1	0.6	-1.3	0.06	2.1	0.02	1.8	0.02	-1.2	0.6	0.0003
Q$261	P56542	DNS2A_MOUSE	Dnase2	Deoxyribonuclease-2-alpha	0.9924	9.35	2	28364735	20673335	23066140	20943070	1043568	2968680	640843	856029	8.2	32.1	6.2	9.1	-1.4	0.2	-1.2	0.01	-1.4	0.003	1.1	0.7	1	0.9	-1.1	0.2	0.02
Q$784	O35639	ANXA3_MOUSE	Anxa3	Annexin A3	1	39.32	9	28194951	23080549	26188244	26792740	1293488	932912	1806745	1083943	10.3	9	15.4	9	-1.2	0.07	-1.1	0.8	-1.1	0.8	1.1	0.5	1.2	0.1	1	0.8	0.08
Q$1824	Q99PT1	GDIR1_MOUSE	Arhgdia	Rho GDP-dissociation inhibitor 1	1	29.9	6	28099309	11226524	26004788	22111281	2047381	964924	3015393	3056099	16.3	19.2	25.9	30.9	-2.5	0.0004	-1.1	0.6	-1.3	0.4	2.3	0.03	2	0.08	-1.2	0.6	0.0007
Q$1090	P48678	LMNA_MOUSE	Lmna	Prelamin-A/C	1	29.17	17	27956110	13222160	29013495	25663667	2680717	701612	2604081	3424522	21.4	11.9	20.1	29.8	-2.1	0.02	1	0.8	-1.1	0.8	2.2	0.02	1.9	0.08	-1.1	0.8	0.002
Q$2024	Q9JKR6	HYOU1_MOUSE	Hyou1	Hypoxia up-regulated protein 1	1	22.62	16	27809538	13743218	22505263	22138387	2642330	791807	2872293	3327589	21.2	12.9	28.5	33.6	-2	0.03	-1.2	0.5	-1.3	0.5	1.6	0.2	1.6	0.2	-1	0.9	0.01
Q$1003	P27005	S10A8_MOUSE	S100a8	Protein S100-A8	1	82.02	6	27745254	10640597	23276218	23180220	1805578	591195	3027656	3400298	14.6	12.4	29.1	32.8	-2.6	0.0001	-1.2	0.6	-1.2	0.6	2.2	0.06	2.2	0.08	-1	1	0.001
Q$1156	P60867	RS20_MOUSE	Rps20	40S ribosomal protein S20	1	28.57	5	27617063	16041902	29429132	26802104	1361065	1558595	2283361	3668563	11	21.7	17.3	30.6	-1.7	0.003	1.1	0.9	-1	0.9	1.8	0.006	1.7	0.1	-1.1	0.9	0.005
Q$1086	P47955	RLA1_MOUSE	Rplp1	60S acidic ribosomal protein P1	1	51.75	4	27599605	29343158	32847044	32724662	2265773	3651586	1353334	1761553	18.4	27.8	9.2	12	1.1	0.9	1.2	0.4	1.2	0.4	1.1	0.9	1.1	0.9	-1	1	0.4
Q$834	P00405	COX2_MOUSE	Mtco2	Cytochrome c oxidase subunit 2	1	32.16	4	27504136	13461337	26904208	25718380	2176165	902759	1637964	2142080	17.7	15	13.6	18.6	-2	0.002	-1	0.9	-1.1	0.9	2	0.0006	1.9	0.003	-1	0.9	0.0001
Q$992	P26040	EZRI_MOUSE	Ezr	Ezrin	1	32.42	15	27240569	11472056	25585370	21222615	1804948	635595	3099761	2784717	14.8	12.4	27.1	29.3	-2.4	0.0002	-1.1	0.7	-1.3	0.3	2.2	0.05	1.8	0.09	-1.2	0.5	0.0008
Q$926	P14733	LMNB1_MOUSE	Lmnb1	Lamin-B1	1	27.38	15	27090828	16905681	32647527	26686149	1519352	422675	3228356	1347867	12.5	5.6	22.1	11.3	-1.6	0.009	1.2	0.3	-1	0.8	1.9	0.03	1.6	0.007	-1.2	0.3	0.0003
Q$661	G3UY38	G3UY38_MOUSE	Hnrnpl	Heterogeneous nuclear ribonucleoprotein L	1	64.91	16	26898118	13066068	25698819	22158158	1908001	327528	2084601	2463917	15.9	5.6	18.1	24.9	-2.1	0.01	-1	0.7	-1.2	0.4	2	0.02	1.7	0.08	-1.2	0.5	0.0004
Q$748	M0QWA7	M0QWA7_MOUSE	Itgb2	Integrin beta	1	54.17	19	26854076	11660670	24223304	22090908	2381647	391320	2795450	2176308	19.8	7.5	25.8	22	-2.3	0.02	-1.1	0.7	-1.2	0.4	2.1	0.04	1.9	0.04	-1.1	0.7	0.0007
Q$141	B7FAV1	B7FAV1_MOUSE	Flna	Filamin, alpha (Fragment)	1	28.22	45	26785875	15303896	26420583	23422770	1919435	411020	2385712	2287282	16	6	20.2	21.8	-1.8	0.02	-1	0.9	-1.1	0.6	1.7	0.04	1.5	0.09	-1.1	0.6	0.002
Q$1301	P97855	G3BP1_MOUSE	G3bp1	Ras GTPase-activating protein-binding protein 1	1	21.08	8	26732608	10398498	19962308	16506995	1259760	723508	2340145	1511173	10.5	15.6	26.2	20.5	-2.6	2e-05	-1.3	0.07	-1.6	0.004	1.9	0.04	1.6	0.03	-1.2	0.2	2e-05
Q$1322	Q05144	RAC2_MOUSE	Rac2	Ras-related C3 botulinum toxin substrate 2	1	28.13	7	26685526	10732877	24382541	21741065	2021204	402398	2423887	2377120	16.9	8.4	22.2	24.4	-2.5	0.007	-1.1	0.7	-1.2	0.4	2.3	0.02	2	0.04	-1.1	0.7	0.0002
Q$919	P14131	RS16_MOUSE	Rps16	40S ribosomal protein S16	1	42.47	8	26217564	12237593	27557648	21962819	1461578	706116	3006918	2358997	12.5	12.9	24.4	24	-2.1	0.0002	1.1	0.7	-1.2	0.4	2.3	0.03	1.8	0.05	-1.3	0.4	0.0003
Q$1789	Q99KE1	MAOM_MOUSE	Me2	NAD-dependent malic enzyme, mitochondrial	1	39.73	16	25996109	19793281	26250049	22628725	800701	1197607	1383244	1613599	6.9	13.5	11.8	15.9	-1.3	0.02	1	0.9	-1.1	0.3	1.3	0.04	1.1	0.4	-1.2	0.3	0.008
Q$1072	P45952	ACADM_MOUSE	Acadm	Medium-chain specific acyl-CoA dehydrogenase, mitochondrial	1	20.19	5	25818833	11951931	22791684	20426128	604552	1361069	1716991	2172890	5.2	25.5	16.8	23.8	-2.2	9e-05	-1.1	0.3	-1.3	0.2	1.9	0.006	1.7	0.04	-1.1	0.4	8e-05
Q$1855	Q9CQQ7	AT5F1_MOUSE	Atp5f1	ATP synthase F(0) complex subunit B1, mitochondrial	1	26.17	6	25793574	14000243	23427996	20872031	1838001	960967	1810607	2957964	15.9	15.3	17.3	31.7	-1.8	0.003	-1.1	0.6	-1.2	0.5	1.7	0.009	1.5	0.2	-1.1	0.6	0.005
Q$2034	Q9QWL7	K1C17_MOUSE	Krt17	Keratin, type I cytoskeletal 17	1	26.79	11	25704440	16540503	27097989	19570492	5217272	3050039	4527148	2068249	45.4	41.2	37.4	23.6	-1.6	0.6	1.1	0.8	-1.3	0.7	1.6	0.4	1.2	0.7	-1.4	0.6	0.2
Q$1380	Q3UJQ9	Q3UJQ9_MOUSE	Oxct1	Succinyl-CoA:3-ketoacid-coenzyme A transferase	1	27.37	9	25263845	19362630	24460807	22498911	1107885	214745	1490231	1822937	9.8	2.5	13.6	18.1	-1.3	0.03	-1	0.7	-1.1	0.5	1.3	0.1	1.2	0.5	-1.1	0.7	0.03
Q$1953	Q9D8E6	RL4_MOUSE	Rpl4	60S ribosomal protein L4	1	36.04	17	25019618	12346576	25225429	22742811	2846351	650862	3018179	3013692	25.4	11.8	26.8	29.6	-2	0.06	1	1	-1.1	0.9	2	0.06	1.8	0.09	-1.1	0.9	0.008
Q$1467	Q61878	PRG2_MOUSE	Prg2	Bone marrow proteoglycan	1	39.01	7	24977209	20745288	27185397	24396644	1659298	951266	2828408	2731611	14.9	10.3	23.3	25	-1.2	0.3	1.1	0.9	-1	0.9	1.3	0.3	1.2	0.7	-1.1	0.9	0.3
Q$604	P62270	RS18_MOUSE	Rps18	40S ribosomal protein S18	1	44.08	9	24766861	19041255	24966043	22488536	853034	1110782	1805242	1159809	7.7	13	16.2	11.5	-1.3	0.02	1	0.9	-1.1	0.4	1.3	0.1	1.2	0.2	-1.1	0.5	0.02
Q$1087	P47962	RL5_MOUSE	Rpl5	60S ribosomal protein L5	1	23.91	10	24602970	12620602	26570657	22523255	1629556	2122980	3008292	1984813	14.8	37.6	25.3	19.7	-1.9	0.01	1.1	0.7	-1.1	0.7	2.1	0.03	1.8	0.04	-1.2	0.6	0.002
Q$685	G3XA10	G3XA10_MOUSE	Hnrnpu	Heterogeneous nuclear ribonucleoprotein U	1	25.6	17	24561497	17764674	25607466	24094525	626495	568855	1570856	2191215	5.7	7.2	13.7	20.3	-1.4	0.0003	1	0.9	-1	0.9	1.4	0.008	1.4	0.2	-1.1	0.9	0.005
Q$1786	Q99K48	NONO_MOUSE	Nono	Non-POU domain-containing octamer-binding protein	1	39.11	13	24505686	15133933	23417194	22462851	1831532	548204	1845062	2233570	16.7	8.1	17.6	22.2	-1.6	0.03	-1	0.9	-1.1	0.9	1.5	0.04	1.5	0.1	-1	0.9	0.006
Q$1734	Q91VD9	NDUS1_MOUSE	Ndufs1	NADH-ubiquinone oxidoreductase 75 kDa subunit, mitochondrial	1	30.81	15	24410820	11488189	23454586	20874856	2805405	521045	2159758	2361172	25.7	10.1	20.6	25.3	-2.1	0.04	-1	0.8	-1.2	0.7	2	0.02	1.8	0.06	-1.1	0.7	0.002
Q$793	O54734	OST48_MOUSE	Ddost	Dolichyl-diphosphooligosaccharide--protein glycosyltransferase 48 kDa subunit	1	36.05	10	24350048	12284796	23115150	22507707	1708172	655065	1586318	928358	15.7	11.9	15.3	9.2	-2	0.0009	-1.1	0.8	-1.1	0.8	1.9	0.0009	1.8	0.0001	-1	0.8	2e-05
Q$1878	Q9CWJ9	PUR9_MOUSE	Atic	Bifunctional purine biosynthesis protein PURH	1	39.36	14	24169987	14885139	22517022	22992601	2461284	1800990	2838817	2240824	22.8	27.1	28.2	21.8	-1.6	0.09	-1.1	1	-1.1	1	1.5	0.2	1.5	0.1	1	1	0.05
Q$2117	S4R1N6	S4R1N6_MOUSE	Rps18	40S ribosomal protein S18	1	52.34	8	24159554	18560413	23868538	21410172	813604	1082086	1771506	1034673	7.5	13	16.6	10.8	-1.3	0.02	-1	0.9	-1.1	0.3	1.3	0.2	1.2	0.3	-1.1	0.5	0.02
Q$1701	Q8R2S8	CD177_MOUSE	Cd177	CD177 antigen	1	28.27	14	23509576	11948840	19327068	19003408	599812	625433	1779374	1960481	5.7	11.7	20.6	23.1	-2	6e-06	-1.2	0.2	-1.2	0.2	1.6	0.02	1.6	0.08	-1	0.9	0.0002
Q$1200	P62814	VATB2_MOUSE	Atp6v1b2	V-type proton ATPase subunit B, brain isoform	1	63.6	22	23398818	11557936	21168057	19597673	1444798	281226	2553905	2431469	13.8	5.4	27	27.7	-2	0.006	-1.1	0.7	-1.2	0.5	1.8	0.09	1.7	0.1	-1.1	0.7	0.003
Q$2079	Q9WUU7	CATZ_MOUSE	Ctsz	Cathepsin Z	1	39.87	7	23243694	10802450	21004115	17206247	2072977	1341681	2746618	1740098	19.9	27.8	29.2	22.6	-2.2	0.006	-1.1	0.5	-1.4	0.2	1.9	0.05	1.6	0.08	-1.2	0.5	0.003
Q$869	P08030	APT_MOUSE	Aprt	Adenine phosphoribosyltransferase	1	48.33	5	23206760	17642509	20329060	18974653	937930	841028	1459874	1108597	9	10.7	16.1	13.1	-1.3	0.01	-1.1	0.4	-1.2	0.09	1.2	0.4	1.1	0.6	-1.1	0.6	0.02
Q$1197	P62754	RS6_MOUSE	Rps6	40S ribosomal protein S6	1	19.28	6	23201484	11041464	22551689	18687103	2007706	617098	1000926	2003108	19.3	12.5	9.9	24	-2.1	0.01	-1	0.8	-1.2	0.3	2	6e-05	1.7	0.06	-1.2	0.3	0.0001
Q$821	O88569-2	ROA2_MOUSE	Hnrnpa2b	Isoform 2 of Heterogeneous nuclear ribonucleoproteins A2/B1	1	50.44	17	23200250	13386628	23451548	21093832	631088	532436	2736511	2180617	6.1	8.9	26.1	23.1	-1.7	1e-05	1	0.9	-1.1	0.8	1.8	0.1	1.6	0.1	-1.1	0.8	0.003
Q$552	E9QAZ2	E9QAZ2_MOUSE	Gm10020	Ribosomal protein L15	1	27.45	6	23075088	13744439	21252652	19133881	834009	892610	1524828	1627898	8.1	14.5	16	19	-1.7	0.0004	-1.1	0.5	-1.2	0.2	1.5	0.01	1.4	0.08	-1.1	0.5	0.0006
Q$756	O08709	PRDX6_MOUSE	Prdx6	Peroxiredoxin-6	1	80.36	16	23028662	11179923	21870792	18675919	981640	725229	1838227	2016899	9.5	14.5	18.8	24.1	-2.1	6e-05	-1.1	0.6	-1.2	0.2	2	0.003	1.7	0.03	-1.2	0.5	0.0002
Q$1524	Q6NXH9	K2C73_MOUSE	Krt73	Keratin, type II cytoskeletal 73	1	2.04	1	22944633	22137167	21564467	22146600	1259904	1285119	1164922	1070357	12.3	13	12.1	10.8	-1	1	-1.1	1	-1	1	-1	1	1	1	1	1	0.9
Q$918	P14115	RL27A_MOUSE	Rpl27a	60S ribosomal protein L27a	1	29.05	5	22930052	15849515	22704929	20405011	798989	818299	1399223	1319107	7.8	11.5	13.8	14.5	-1.4	0.002	-1	0.9	-1.1	0.4	1.4	0.01	1.3	0.07	-1.1	0.5	0.001
Q$1661	Q8CGK3	LONM_MOUSE	Lonp1	Lon protease homolog, mitochondrial	1	26.87	13	22922625	13818443	21284407	20597958	1954695	538125	1561918	1699438	19.1	8.7	16.4	18.4	-1.7	0.04	-1.1	0.8	-1.1	0.8	1.5	0.01	1.5	0.05	-1	0.8	0.004
Q$806	O70251	EF1B_MOUSE	Eef1b	Elongation factor 1-beta	1	58.67	8	22769915	13272437	22464173	19530564	2118627	704299	2071481	2575370	20.8	11.9	20.6	29.5	-1.7	0.02	-1	0.9	-1.2	0.7	1.7	0.02	1.5	0.3	-1.2	0.7	0.01
Q$1012	P29341	PABP1_MOUSE	Pabpc1	Polyadenylate-binding protein 1	1	27.67	16	22556695	14135375	23621720	20354971	1345819	484829	1670247	1507428	13.3	7.7	15.8	16.6	-1.6	0.002	1	0.6	-1.1	0.5	1.7	0.02	1.4	0.05	-1.2	0.5	0.0006
Q$1907	Q9D0E1-2	HNRPM_MOUSE	Hnrnp	Isoform 2 of Heterogeneous nuclear ribonucleoprotein M	1	29.86	18	22498679	12343776	21539855	20513484	1725206	1164102	3081279	3488949	17.1	21.1	32	38	-1.8	0.007	-1	1	-1.1	0.9	1.7	0.1	1.7	0.2	-1.1	1	0.05
Q$1596	Q8BH04	PCKGM_MOUSE	Pck2	Phosphoenolpyruvate carboxykinase [GTP], mitochondrial	1	35.63	15	22397186	17122464	22985960	20334918	1078987	867371	1287096	1270440	10.8	11.3	12.5	14	-1.3	0.03	1	0.7	-1.1	0.5	1.3	0.03	1.2	0.3	-1.1	0.5	0.009
Q$1979	Q9DCC5	Q9DCC5_MOUSE	Cbx3	Cbx3 protein	1	46.99	10	22383827	11846232	21826823	19773456	1199084	659053	1713792	1297243	12	12.4	17.6	14.7	-1.9	0.0003	-1	0.8	-1.1	0.4	1.8	0.003	1.7	0.003	-1.1	0.6	8e-05
Q$1333	Q61820	RANT_MOUSE	Rasl2-9	GTP-binding nuclear protein Ran, testis-specific isoform	1	26.39	6	22380216	8520674	20842624	18085305	1358145	748165	2656504	2708080	13.6	19.6	28.5	33.5	-2.6	0.0001	-1.1	0.7	-1.2	0.5	2.4	0.04	2.1	0.08	-1.2	0.7	0.0009
Q$1673	Q8JZU2	Q8JZU2_MOUSE	Slc25a1	Protein Slc25a1	1	20.58	5	22312899	12496825	18301992	15485115	6048576	1505265	2454906	771967	60.6	26.9	30	11.1	-1.8	0.6	-1.2	0.7	-1.4	0.7	1.5	0.4	1.2	0.5	-1.2	0.7	0.2
Q$1965	Q9DB77	QCR2_MOUSE	Uqcrc2	Cytochrome b-c1 complex subunit 2, mitochondrial	1	45.7	13	22140177	14195151	20117513	20929571	2389149	1538654	1997626	2961724	24.1	24.2	22.2	31.6	-1.6	0.1	-1.1	0.9	-1.1	0.9	1.4	0.2	1.5	0.3	1	0.9	0.1
Q$1306	P99029-2	PRDX5_MOUSE	Prdx	Isoform Cytoplasmic+peroxisomal of Peroxiredoxin-5, mitochondrial	1	73.46	16	22121895	10062791	18235689	15553217	1340663	679496	1639569	1035439	13.6	15.1	20.1	14.9	-2.2	0.0003	-1.2	0.2	-1.4	0.01	1.8	0.009	1.5	0.009	-1.2	0.2	3e-05
Q$1959	Q9D964	GATM_MOUSE	Gatm	Glycine amidinotransferase, mitochondrial	1	34.28	12	22076863	10476959	20925059	17823158	1590392	470080	1960520	2103001	16.1	10	21	26.4	-2.1	0.007	-1.1	0.7	-1.2	0.4	2	0.02	1.7	0.09	-1.2	0.5	0.0006
Q$1807	Q99LC5	ETFA_MOUSE	Etfa	Electron transfer flavoprotein subunit alpha, mitochondrial	1	42.94	10	22034967	12484709	20924455	18454624	2189586	624599	1941833	1864396	22.2	11.2	20.8	22.6	-1.8	0.06	-1.1	0.7	-1.2	0.6	1.7	0.06	1.5	0.06	-1.1	0.6	0.007
Q$1780	Q99JI6	RAP1B_MOUSE	Rap1b	Ras-related protein Rap-1b	1	76.09	17	22026801	14452548	25287091	24130485	1081010	1367737	2120740	3043792	11	21.2	18.8	28.2	-1.5	0.01	1.1	0.5	1.1	0.8	1.7	0.01	1.7	0.08	-1	0.8	0.008
Q$1556	Q78PY7	SND1_MOUSE	Snd1	Staphylococcal nuclease domain-containing protein 1	1	31.43	20	21962056	15060707	23595587	21286132	1286881	836171	1663069	1271221	13.1	12.4	15.8	13.4	-1.5	0.01	1.1	0.7	-1	0.7	1.6	0.01	1.4	0.01	-1.1	0.7	0.001
Q$803	O70145	NCF2_MOUSE	Ncf2	Neutrophil cytosol factor 2	1	11.62	5	21920882	17329445	20947740	23638111	818680	1360134	1058430	3510160	8.4	17.6	11.3	33.2	-1.3	0.1	-1	0.9	1.1	0.9	1.2	0.3	1.4	0.4	1.1	0.9	0.2
Q$159	P14206	RSSA_MOUSE	Rpsa	40S ribosomal protein SA	1	34.92	10	21865618	11157796	22302829	19018729	863382	994379	2340094	1656535	8.8	19.9	23.5	19.5	-2	0.0002	1	0.9	-1.1	0.4	2	0.01	1.7	0.01	-1.2	0.5	0.0004
Q$1075	P46460	NSF_MOUSE	Nsf	Vesicle-fusing ATPase	1	18.55	8	21860837	12248986	19796570	18541862	1149865	492110	1536994	1379343	11.8	9	17.4	16.6	-1.8	0.0003	-1.1	0.5	-1.2	0.3	1.6	0.02	1.5	0.01	-1.1	0.6	0.0003
Q$481	E9PZF0	E9PZF0_MOUSE	Gm20390	Nucleoside diphosphate kinase	1	32.96	8	21668576	10253793	20945042	18330024	811629	1275104	2543291	1917214	8.4	27.8	27.2	23.4	-2.1	0.0004	-1	0.8	-1.2	0.4	2	0.03	1.8	0.03	-1.1	0.7	0.001
Q$1269	P80317	TCPZ_MOUSE	Cct6a	T-complex protein 1 subunit zeta	1	33.33	15	21611570	10311894	20986733	18299129	1452305	844447	2074172	1798792	15	18.3	22.1	22	-2.1	0.0009	-1	0.8	-1.2	0.5	2	0.007	1.8	0.02	-1.1	0.6	0.0005
Q$465	E9PX41	E9PX41_MOUSE	Zswim6	Zinc finger SWIM domain-containing protein 6	0.9337	4.14	1	21548100	12993910	41555300	25293800	2635746	1226996	3495204	1773922	27.4	21.1	18.8	15.7	-1.7	0.04	1.9	0.007	1.2	0.3	3.2	0.0003	1.9	0.002	-1.6	0.01	4e-06
Q$2095	Q9Z183	PADI4_MOUSE	Padi4	Protein-arginine deiminase type-4	1	19.97	7	21526286	9916295	22760795	21397100	1512174	1231520	2320449	1389733	15.7	27.8	22.8	14.5	-2.2	0.002	1.1	0.9	-1	1	2.3	0.005	2.2	0.002	-1.1	0.9	0.0001
Q$896	Q8CGP2-2	H2B1P_MOUSE	Hist1h2b	Isoform 2 of Histone H2B type 1-P	1	32.61	6	21251359	9659513	37342474	23366004	3833722	1232501	1989201	1344169	40.3	28.5	11.9	12.9	-2.2	0.07	1.8	0.02	1.1	0.6	3.9	1e-05	2.4	0.0003	-1.6	0.002	4e-06
Q$1207	P62852	RS25_MOUSE	Rps25	40S ribosomal protein S25	1	15.2	2	21207290	10680380	22560020	19163300	868465	1857112	2536824	889988	9.2	38.9	25.1	10.4	-2	0.005	1.1	0.6	-1.1	0.4	2.1	0.02	1.8	0.02	-1.2	0.4	0.0006
Q$2016	Q9JII6	AK1A1_MOUSE	Akr1a1	Alcohol dehydrogenase [NADP(+)]	1	39.38	10	21132453	10917124	19843743	17594368	1056884	396787	2288195	1781183	11.2	8.1	25.8	22.6	-1.9	0.0001	-1.1	0.7	-1.2	0.3	1.8	0.08	1.6	0.08	-1.1	0.7	0.001
Q$2026	Q9JM76	ARPC3_MOUSE	Arpc3	Actin-related protein 2/3 complex subunit 3	1	17.42	4	21073038	11514478	20604590	14430393	4615596	2535142	3667723	2003621	49	49.2	39.8	31	-1.8	0.4	-1	0.9	-1.5	0.5	1.8	0.4	1.3	0.6	-1.4	0.5	0.2
Q$3	A2A4Q0	A2A4Q0_MOUSE	Rpl27	60S ribosomal protein L27 (Fragment)	1	10.34	1	21044900	18805450	22071900	20337000	1055303	1361404	1857972	1304309	11.2	16.2	18.8	14.3	-1.1	0.7	1	0.9	-1	0.9	1.2	0.7	1.1	0.9	-1.1	0.9	0.5
Q$878	P08752	GNAI2_MOUSE	Gnai2	Guanine nucleotide-binding protein G(i) subunit alpha-2	1	49.3	15	21036730	11175348	19595193	18669898	2262463	854389	2307523	2199408	24	17.1	26.3	26.3	-1.9	0.02	-1.1	0.9	-1.1	0.9	1.8	0.04	1.7	0.05	-1	0.9	0.01
Q$152	B8JK32	B8JK32_MOUSE	Hnrnpm	Heterogeneous nuclear ribonucleoprotein M	1	27.98	16	20824563	11425004	19674250	18472794	1482060	1183598	2896597	3195901	15.9	23.2	32.9	38.7	-1.8	0.007	-1.1	0.9	-1.1	0.9	1.7	0.1	1.6	0.3	-1.1	0.9	0.05
Q$1162	P61161	ARP2_MOUSE	Actr2	Actin-related protein 2	1	45.43	12	20563755	11618072	20791459	17421633	816773	566655	2046310	1652846	8.9	10.9	22	21.2	-1.8	0.0001	1	0.9	-1.2	0.3	1.8	0.04	1.5	0.04	-1.2	0.4	0.0009
Q$1372	Q9ET01	PYGL_MOUSE	Pygl	Glycogen phosphorylase, liver form	1	17.18	12	20413082	9610979	18139122	16230559	1809828	776387	1774730	2219026	19.8	18.1	21.9	30.6	-2.1	0.003	-1.1	0.6	-1.3	0.5	1.9	0.01	1.7	0.09	-1.1	0.6	0.003
Q$857	P05213	TBA1B_MOUSE	Tuba1b	Tubulin alpha-1B chain	1	24.61	8	20397398	9021876	18099432	14633787	709664	1287654	2367513	1356292	7.8	31.9	29.2	20.7	-2.3	0.0003	-1.1	0.4	-1.4	0.03	2	0.04	1.6	0.05	-1.2	0.4	0.0005
Q$664	G3UYU0	G3UYU0_MOUSE	Mex3a	Protein Mex3a	0.9772	6.92	1	20338600	24128900	22256300	22375000	530028	1523990	293962	791211	5.8	14.1	3	7.9	1.2	0.2	1.1	0.08	1.1	0.2	-1.1	0.6	-1.1	0.6	1	0.9	0.07
Q$1550	Q6ZWV7	RL35_MOUSE	Rpl35	60S ribosomal protein L35	0.9989	18.7	3	20334147	7604698	18037420	14598829	424695	1365544	2752387	1703663	4.7	40.2	34.1	26.1	-2.7	0.002	-1.1	0.5	-1.4	0.08	2.4	0.05	1.9	0.05	-1.2	0.5	0.0006
Q$1367	Q3U9G9	LBR_MOUSE	Lbr	Lamin-B receptor	1	12.3	9	20265652	8097378	20113488	18197104	1187502	400895	1847216	1737869	13.1	11.1	20.5	21.4	-2.5	6e-05	-1	0.9	-1.1	0.7	2.5	0.01	2.2	0.01	-1.1	0.7	3e-05
Q$755	O08692	O08692_MOUSE	Ngp	Myeloid bactenecin (F1)	1	35.33	6	20213591	10553679	18872472	16875741	804084	508848	614722	991704	8.9	10.8	7.3	13.1	-1.9	4e-05	-1.1	0.2	-1.2	0.09	1.8	4e-05	1.6	0.002	-1.1	0.2	5e-07
Q$1826	Q99PV0	PRP8_MOUSE	Prpf8	Pre-mRNA-processing-splicing factor 8	1	8.09	12	20121331	9698863	19850508	17068898	1024946	707865	1960317	2032447	11.4	16.3	22.1	26.6	-2.1	0.0002	-1	0.9	-1.2	0.5	2	0.006	1.8	0.04	-1.2	0.6	0.0006
Q$630	F8WI35	F8WI35_MOUSE	H3f3a	Histone H3	1	11.85	2	19987400	10485067	33908550	22161417	4018794	2430247	4228703	1412733	45	51.8	27.9	14.3	-1.9	0.1	1.7	0.1	1.1	0.6	3.2	0.008	2.1	0.02	-1.5	0.1	0.001
Q$1445	Q61206	PA1B2_MOUSE	Pafah1b2	Platelet-activating factor acetylhydrolase IB subunit beta	0.9674	3.93	1	19940300	23767800	19909400	18717500	1754286	1846419	1418491	1811876	19.7	17.4	15.9	21.6	1.2	0.5	-1	1	-1.1	0.9	-1.2	0.5	-1.3	0.4	-1.1	0.9	0.2
Q$1761	Q921M3-2	SF3B3_MOUSE	Sf3b	Isoform 2 of Splicing factor 3B subunit 3	1	9.71	7	19936392	16701683	19080989	18853763	907766	281743	1009361	996327	10.2	3.8	11.8	11.8	-1.2	0.1	-1	0.8	-1.1	0.8	1.1	0.3	1.1	0.3	-1	0.9	0.09
Q$1177	P62196	PRS8_MOUSE	Psmc5	26S protease regulatory subunit 8	1	20.94	5	19903782	18423563	22873040	20388049	1581938	1611280	1929485	1160517	17.8	19.6	18.9	12.7	-1.1	0.8	1.1	0.8	1	0.8	1.2	0.5	1.1	0.8	-1.1	0.8	0.3
Q$1359	Q3U0V1	FUBP2_MOUSE	Khsrp	Far upstream element-binding protein 2	1	22.73	11	19636673	9164511	18916913	16637073	792491	417453	1877737	1299185	9	10.2	22.2	17.5	-2.1	2e-05	-1	0.7	-1.2	0.2	2.1	0.02	1.8	0.02	-1.1	0.6	6e-05
Q$1568	Q80TA9	EPG5_MOUSE	Epg5	Ectopic P granules protein 5 homolog	0.9076	0.7	1	19613600	17548900	19038800	18442900	372116	764689	479165	768932	4.2	9.7	5.6	9.3	-1.1	0.2	-1	0.8	-1.1	0.6	1.1	0.5	1.1	0.8	-1	0.8	0.2
Q$704	H3BJQ7	H3BJQ7_MOUSE	Prdx5	Peroxiredoxin-6	1	47.89	13	19602639	8328684	16034201	13537963	1213372	586040	1555556	920006	13.8	15.7	21.7	15.2	-2.4	0.0002	-1.2	0.2	-1.4	0.01	1.9	0.007	1.6	0.007	-1.2	0.2	2e-05
Q$1457	Q8BTS0	Q8BTS0_MOUSE	Ddx5	DEAD (Asp-Glu-Ala-Asp) box polypeptide 5	1	32.52	17	19602453	10230791	18675458	17644242	1914096	1451073	1879927	2243350	21.8	31.7	22.5	28.4	-1.9	0.03	-1	0.9	-1.1	0.9	1.8	0.04	1.7	0.09	-1.1	0.9	0.01
Q$1796	Q99KP6	PRP19_MOUSE	Prpf19	Pre-mRNA-processing factor 19	1	33.93	8	19601238	8726437	18205523	16984624	1533200	747537	2292843	2363644	17.5	19.2	28.2	31.1	-2.2	0.001	-1.1	0.9	-1.2	0.8	2.1	0.02	1.9	0.09	-1.1	0.9	0.003
Q$1856	Q9CQR2	RS21_MOUSE	Rps21	40S ribosomal protein S21	1	40.96	5	19591994	7911005	18917338	17111375	1263374	743181	1863680	1147045	14.4	21	22	15	-2.5	0.0003	-1	0.8	-1.1	0.5	2.4	0.002	2.2	0.0007	-1.1	0.7	3e-05
Q$1999	Q9ERI2	RB27A_MOUSE	Rab27a	Ras-related protein Rab-27A	1	10.86	2	19470090	16707245	19308750	18994750	448892	1709548	1251713	1132800	5.2	22.9	14.5	13.3	-1.2	0.7	-1	1	-1	1	1.2	0.8	1.1	0.8	-1	1	0.4
Q$1635	Q8BW75	AOFB_MOUSE	Maob	Amine oxidase [flavin-containing] B	1	14.23	6	19468764	6015187	7012807	20943164	6655820	1478623	1312258	10472053	76.4	55	41.8	111.8	-3.2	0.5	-2.8	0.5	1.1	0.9	1.2	0.9	3.5	0.6	3	0.6	0.2
Q$1679	Q8K1K2	Q8K1K2_MOUSE	Psmc5	26S protease regulatory subunit 8	1	20.11	4	19444383	18180402	22425838	20026839	1574335	1616206	1893121	1127045	18.1	19.9	18.9	12.6	-1.1	0.8	1.2	0.8	1	0.8	1.2	0.6	1.1	0.8	-1.1	0.8	0.3
Q$1472	Q62029	Q62029_MOUSE	Pabpc2	Poly A binding protein, cytoplasmic 2	1	4.78	1	19427900	9196470	18679000	16218560	810490	771837	2215685	2063919	9.3	18.8	26.5	28.5	-2.1	0.0001	-1	0.8	-1.2	0.5	2	0.02	1.8	0.05	-1.2	0.7	0.001
Q$1906	Q9D051	ODPB_MOUSE	Pdhb	Pyruvate dehydrogenase E1 component subunit beta, mitochondrial	1	27.86	7	19381416	9575027	18853634	16811924	1418034	530410	2187708	1614511	16.4	12.4	25.9	21.5	-2	0.001	-1	0.8	-1.2	0.6	2	0.05	1.8	0.01	-1.1	0.7	0.001
Q$794	O54890	ITB3_MOUSE	Itgb3	Integrin beta-3	1	23	14	19339911	11870302	22387895	24247675	1385612	516527	1668305	3236952	16	9.7	16.7	29.9	-1.6	0.006	1.2	0.5	1.3	0.5	1.9	0.01	2	0.07	1.1	0.6	0.002
Q$1064	P42932	TCPQ_MOUSE	Cct8	T-complex protein 1 subunit theta	1	29.93	13	19337437	8072062	17898424	17220006	2075702	448459	1736766	2688866	24	12.4	21.7	34.9	-2.4	0.02	-1.1	0.9	-1.1	0.9	2.2	0.02	2.1	0.1	-1	0.9	0.003
Q$1182	P62264	RS14_MOUSE	Rps14	40S ribosomal protein S14	1	26.49	6	19286641	7942506	17640531	15244801	1149951	869956	1529830	1639606	13.3	24.5	19.4	24	-2.4	0.0003	-1.1	0.5	-1.3	0.2	2.2	0.003	1.9	0.02	-1.2	0.5	9e-05
Q$1554	Q76MZ3	2AAA_MOUSE	Ppp2r1a	Serine/threonine-protein phosphatase 2A 65 kDa regulatory subunit A alpha isoform	1	25.64	13	19231499	16255996	20291134	19753493	757146	1805297	1713852	1126792	8.8	24.8	18.9	12.8	-1.2	0.6	1.1	0.9	1	0.9	1.2	0.6	1.2	0.6	-1	0.9	0.2
Q$1485	Q62422	OSTF1_MOUSE	Ostf1	Osteoclast-stimulating factor 1	1	46.51	7	19157390	10185277	16884408	14858710	1013296	687003	1182702	1392350	11.8	15.1	15.7	21	-1.9	0.0005	-1.1	0.3	-1.3	0.1	1.7	0.006	1.5	0.07	-1.1	0.3	0.0002
Q$1730	Q91V41	RAB14_MOUSE	Rab14	Ras-related protein Rab-14	1	45.12	8	19134284	7333721	17166501	16014443	1544118	498404	2099923	2185356	18	15.2	27.4	30.5	-2.6	0.0005	-1.1	0.7	-1.2	0.6	2.3	0.04	2.2	0.06	-1.1	0.7	0.0009
Q$854	P05063	ALDOC_MOUSE	Aldoc	Fructose-bisphosphate aldolase C	1	27.27	7	18923447	7552814	16932677	14331392	1811498	385427	2237817	1638775	21.4	11.4	29.6	25.6	-2.5	0.02	-1.1	0.6	-1.3	0.3	2.2	0.06	1.9	0.06	-1.2	0.6	0.001
Q$817	O88456	CPNS1_MOUSE	Capns1	Calpain small subunit 1	1	27.14	4	18904185	9630665	21225032	17872824	1587057	449516	1050265	2791748	18.8	10.4	11.1	34.9	-2	0.02	1.1	0.6	-1.1	0.8	2.2	5e-05	1.9	0.2	-1.2	0.6	0.001
Q$689	G5E839	G5E839_MOUSE	Cct4	T-complex protein 1 subunit delta	1	39.88	12	18857913	7619725	16365998	14798482	1326987	375034	2239463	2357460	15.7	11	30.6	35.6	-2.5	0.004	-1.2	0.6	-1.3	0.4	2.1	0.08	1.9	0.1	-1.1	0.6	0.002
Q$1523	Q6NS46	RRP5_MOUSE	Pdcd11	Protein RRP5 homolog	0.9998	3.01	4	18783043	8010517	18923815	8559769	10386317	3356555	8885145	1101433	123.6	93.7	105	28.8	-2.3	0.9	1	1	-2.2	0.9	2.4	0.9	1.1	1	-2.2	0.9	0.5
Q$1725	Q8VED5	K2C79_MOUSE	Krt79	Keratin, type II cytoskeletal 79	1	8.66	5	18657508	9803429	13665722	13346197	9348347	4963110	4956041	4575497	112	113.2	81.1	76.7	-1.9	1	-1.4	1	-1.4	1	1.4	1	1.4	1	-1	1	0.8
Q$1257	P70349	HINT1_MOUSE	Hint1	Histidine triad nucleotide-binding protein 1	1	35.71	2	18642115	8596913	16055055	14149044	1006782	692784	1733192	1178827	12.1	18	24.1	18.6	-2.2	0.0002	-1.2	0.4	-1.3	0.06	1.9	0.02	1.6	0.02	-1.1	0.4	0.0002
Q$1385	Q3UV17	K22O_MOUSE	Krt76	Keratin, type II cytoskeletal 2 oral	1	4.21	3	18454806	22677613	30106861	24671530	9091560	7037533	6664531	6668291	110.2	69.4	49.5	60.4	1.2	1	1.6	0.9	1.3	1	1.3	1	1.1	1	-1.2	1	0.7
Q$1051	P35980	RL18_MOUSE	Rpl18	60S ribosomal protein L18	1	25.53	5	18424404	8267786	19397565	16295373	1421829	926233	2135675	651245	17.3	25.1	24.6	8.9	-2.2	0.002	1.1	0.7	-1.1	0.5	2.3	0.006	2	0.0006	-1.2	0.5	0.0001
Q$1098	P49710	HCLS1_MOUSE	Hcls1	Hematopoietic lineage cell-specific protein	1	17.7	6	18421833	12886500	17727395	16778136	1370156	641108	1846114	1176559	16.6	11.1	23.3	15.7	-1.4	0.04	-1	0.9	-1.1	0.8	1.4	0.1	1.3	0.09	-1.1	0.9	0.04
Q$1323	Q05306	COAA1_MOUSE	Col10a1	Collagen alpha-1(X) chain	0.9848	10.44	2	18379470	17245995	19310900	17890537	1533056	1750587	2294042	2540096	18.7	22.7	26.6	31.7	-1.1	1	1.1	1	-1	1	1.1	1	1	1	-1.1	1	0.9
Q$874	P08228	SODC_MOUSE	Sod1	Superoxide dismutase [Cu-Zn]	1	46.1	7	18204438	6655608	19005358	15936224	1947980	431493	1766094	2490791	23.9	14.5	20.8	34.9	-2.7	0.02	1	0.8	-1.1	0.7	2.9	0.01	2.4	0.07	-1.2	0.7	0.0007
Q$670	G3UZK4	G3UZK4_MOUSE	Rpl18	60S ribosomal protein L18	1	26.47	4	18108938	7990944	19050483	15971975	1414780	939704	2136933	631919	17.5	26.3	25.1	8.8	-2.3	0.002	1.1	0.7	-1.1	0.5	2.4	0.006	2	0.0006	-1.2	0.5	0.0002
Q$1439	Q61096	PRTN3_MOUSE	Prtn3	Myeloblastin	1	44.49	6	18088859	12720199	19717380	19513781	1264307	676739	1152401	2004533	15.6	11.9	13.1	23	-1.4	0.03	1.1	0.7	1.1	0.8	1.6	0.005	1.5	0.05	-1	0.9	0.007
Q$681	Q9DCX2	ATP5H_MOUSE	Atp5h	ATP synthase subunit d, mitochondrial	1	77.02	13	17922966	9719670	17751547	17343292	1651724	310272	1153156	2076637	20.6	7.1	14.5	26.8	-1.8	0.03	-1	1	-1	1	1.8	0.009	1.8	0.08	-1	1	0.002
Q$1103	P50247	SAHH_MOUSE	Ahcy	Adenosylhomocysteinase	1	15.28	5	17896346	7239294	15757547	14060251	2168082	773509	1955899	1370128	27.1	23.9	27.8	21.8	-2.5	0.01	-1.1	0.7	-1.3	0.4	2.2	0.01	1.9	0.01	-1.1	0.7	0.002
Q$1021	P30416	FKBP4_MOUSE	Fkbp4	Peptidyl-prolyl cis-trans isomerase FKBP4	1	25.11	8	17855743	10353875	17355223	15592481	868316	520191	1464718	746175	10.9	11.2	18.9	10.7	-1.7	0.0005	-1	0.8	-1.1	0.2	1.7	0.008	1.5	0.002	-1.1	0.5	0.0002
Q$2006	Q9EST5-2	AN32B_MOUSE	Anp32	Isoform 2 of Acidic leucine-rich nuclear phosphoprotein 32 family member B	1	30.7	9	17833031	13485772	16377716	15056907	1404858	1795636	955719	1158805	17.6	29.8	13	17.2	-1.3	0.4	-1.1	0.8	-1.2	0.6	1.2	0.6	1.1	0.8	-1.1	0.8	0.2
Q$836	P00920	CAH2_MOUSE	Ca2	Carbonic anhydrase 2	1	58.08	9	17812448	11707160	23140490	19056660	2241121	1045432	1992969	2605444	28.1	20	19.3	30.6	-1.5	0.1	1.3	0.3	1.1	0.7	2	0.006	1.6	0.1	-1.2	0.4	0.01
Q$1809	Q99LP6	GRPE1_MOUSE	Grpel1	GrpE protein homolog 1, mitochondrial	1	35.94	8	17769803	8013132	19555549	18445939	1380468	713592	2124996	1875145	17.4	19.9	24.3	22.7	-2.2	0.001	1.1	0.9	1	0.9	2.4	0.004	2.3	0.004	-1.1	0.9	0.0004
Q$595	F6XI62	F6XI62_MOUSE	Rpl7	60S ribosomal protein L7 (Fragment)	1	29.03	9	17733241	7823598	17985407	15050066	785174	938598	1896935	1436888	9.9	26.8	23.6	21.3	-2.3	0.0002	1	0.9	-1.2	0.4	2.3	0.007	1.9	0.01	-1.2	0.4	0.0002
Q$1660	Q8CGC7	SYEP_MOUSE	Eprs	Bifunctional glutamate/proline--tRNA ligase	1	6.61	7	17636752	9969564	15099972	14045445	1764935	754764	1497540	1189367	22.4	16.9	22.2	18.9	-1.8	0.02	-1.2	0.5	-1.3	0.3	1.5	0.08	1.4	0.08	-1.1	0.6	0.008
Q$1781	Q99JR1	SFXN1_MOUSE	Sfxn1	Sideroflexin-1	1	53.42	14	17563427	10651111	19116577	17848236	1292409	425202	1089407	1219978	16.5	8.9	12.7	15.3	-1.6	0.004	1.1	0.8	1	0.9	1.8	0.0005	1.7	0.003	-1.1	0.8	0.0002
Q$1564	Q7TNV0	DEK_MOUSE	Dek	Protein DEK	1	12.89	4	17457301	7997312	18142085	16962845	1454305	1081877	2013937	1958857	18.6	30.2	24.8	25.8	-2.2	0.005	1	1	-1	1	2.3	0.01	2.1	0.02	-1.1	1	0.002
Q$131	P61979-2	HNRPK_MOUSE	Hnrnp	Isoform 2 of Heterogeneous nuclear ribonucleoprotein K	1	43.53	21	17391218	9390866	16127737	14498452	580898	716055	1622919	1263083	7.5	17.1	22.5	19.5	-1.9	0.0001	-1.1	0.7	-1.2	0.2	1.7	0.03	1.5	0.03	-1.1	0.7	0.0007
Q$893	P10639	THIO_MOUSE	Txn	Thioredoxin	1	54.29	6	17215680	7505826	16132100	14814844	1557933	560501	1529121	1871686	20.2	16.7	21.2	28.3	-2.3	0.002	-1.1	0.8	-1.2	0.7	2.1	0.004	2	0.06	-1.1	0.8	0.001
Q$268	P97351	RS3A_MOUSE	Rps3a	40S ribosomal protein S3a	1	42.42	12	17211958	9649742	18834623	16764915	719304	994882	1718396	1315790	9.3	23.1	20.4	17.5	-1.8	0.002	1.1	0.7	-1	0.8	2	0.008	1.7	0.01	-1.1	0.7	0.0004
Q$1212	P62900	RL31_MOUSE	Rpl31	60S ribosomal protein L31	0.9999	16	2	17148140	7950610	18671760	15227580	1406976	670050	1698925	1292098	18.3	18.8	20.3	19	-2.2	0.002	1.1	0.6	-1.1	0.6	2.3	0.002	1.9	0.004	-1.2	0.4	0.0002
Q$1989	Q9DCW4	ETFB_MOUSE	Etfb	Electron transfer flavoprotein subunit beta	1	50.2	12	16935039	11384444	16577927	16140569	1662384	258818	1071339	1348272	21.9	5.1	14.5	18.7	-1.5	0.1	-1	1	-1	1	1.5	0.04	1.4	0.1	-1	1	0.02
Q$1850	Q9CQI6	COTL1_MOUSE	Cotl1	Coactosin-like protein	1	47.18	6	16903577	6299312	13547498	11438539	1406857	506969	1813074	1552732	18.6	18	29.9	30.4	-2.7	0.0006	-1.2	0.3	-1.5	0.09	2.2	0.07	1.8	0.07	-1.2	0.4	0.0006
Q$1601	Q8BH95	ECHM_MOUSE	Echs1	Enoyl-CoA hydratase, mitochondrial	1	20.34	5	16903364	8892172	21319089	16297413	1948768	910503	3204038	2351429	25.8	22.9	33.6	32.3	-1.9	0.03	1.3	0.6	-1	0.8	2.4	0.08	1.8	0.08	-1.3	0.6	0.01
Q$1171	P61982	1433G_MOUSE	Ywhag	14-3-3 protein gamma	1	54.66	12	16890901	8961131	17422442	14696195	902449	266354	1641881	1221902	11.9	6.6	21.1	18.6	-1.9	0.003	1	0.8	-1.1	0.5	1.9	0.03	1.6	0.03	-1.2	0.5	0.0002
Q$1136	P56391	CX6B1_MOUSE	Cox6b1	Cytochrome c oxidase subunit 6B1	1	40.7	3	16726633	8285915	18924420	13399690	2695147	2833413	3064493	1634509	36	76.5	36.2	27.3	-2	0.3	1.1	0.6	-1.2	0.5	2.3	0.2	1.6	0.5	-1.4	0.5	0.05
Q$1096	P49312	ROA1_MOUSE	Hnrnpa1	Heterogeneous nuclear ribonucleoprotein A1	1	39.38	14	16664749	10777217	16420242	14663207	667958	1723208	1856866	1632236	9	35.8	25.3	24.9	-1.5	0.07	-1	0.9	-1.1	0.6	1.5	0.3	1.4	0.5	-1.1	0.7	0.06
Q$1235	P63276	RS17_MOUSE	Rps17	40S ribosomal protein S17	1	56.3	9	16600454	8862649	17749758	15868920	468026	993719	2252376	1519205	6.3	25.1	28.4	21.4	-1.9	0.0006	1.1	0.9	-1	0.9	2	0.03	1.8	0.02	-1.1	0.9	0.002
Q$1231	P63158	HMGB1_MOUSE	Hmgb1	High mobility group protein B1	1	35.81	8	16595149	7425506	13337934	11902878	1213965	1130053	1475129	1463370	16.4	34	24.7	27.5	-2.2	0.003	-1.2	0.2	-1.4	0.1	1.8	0.06	1.6	0.1	-1.1	0.5	0.002
Q$635	F8WIX8	F8WIX8_MOUSE	Hist1h2al	Histone H2A	1	49.6	7	16522540	10340753	24443187	17144308	2358465	1331661	1956851	774311	31.9	28.8	17.9	10.1	-1.6	0.1	1.5	0.09	1	0.8	2.4	0.002	1.7	0.01	-1.4	0.03	0.0003
Q$978	Q8R1M2	H2AJ_MOUSE	H2afj	Histone H2A.J	1	51.16	8	16516816	9590388	27135327	18249585	2579665	1244943	2213281	1166010	34.9	29	18.2	14.3	-1.7	0.08	1.6	0.04	1.1	0.6	2.8	0.0007	1.9	0.005	-1.5	0.03	8e-05
Q$48	Q8BG05-2	ROA3_MOUSE	Hnrnpa	Isoform 2 of Heterogeneous nuclear ribonucleoprotein A3	1	36.69	20	16377130	7459984	15058474	13001629	568158	833511	1637363	1473965	7.8	25	24.3	25.3	-2.2	0.0001	-1.1	0.6	-1.3	0.2	2	0.02	1.7	0.04	-1.2	0.6	0.0005
Q$921	P14152	MDHC_MOUSE	Mdh1	Malate dehydrogenase, cytoplasmic	1	19.46	5	16334786	9708465	15883175	13244756	1911290	1326446	1069125	685763	26.2	30.6	15.1	11.6	-1.7	0.1	-1	0.8	-1.2	0.3	1.6	0.04	1.4	0.2	-1.2	0.2	0.01
Q$752	O08553	DPYL2_MOUSE	Dpysl2	Dihydropyrimidinase-related protein 2	1	28.32	11	16302838	9737585	16039998	12365738	841648	406067	1665822	1007040	11.5	9.3	23.2	18.2	-1.7	0.0007	-1	0.9	-1.3	0.08	1.6	0.08	1.3	0.1	-1.3	0.2	0.001
Q$28	A2AE89	A2AE89_MOUSE	Gstm1	Glutathione S-transferase Mu 1 (Fragment)	1	48.26	9	16285596	12169088	15608445	15217349	646439	213852	719026	897518	8.9	3.9	10.3	13.2	-1.3	0.002	-1	0.8	-1.1	0.7	1.3	0.03	1.3	0.1	-1	0.8	0.002
Q$1140	P57759	ERP29_MOUSE	Erp29	Endoplasmic reticulum resident protein 29	1	54.2	11	16241407	8331076	13821730	12401563	999834	557693	1192276	476669	13.8	15	19.3	8.6	-1.9	0.0007	-1.2	0.3	-1.3	0.03	1.7	0.01	1.5	0.003	-1.1	0.3	7e-05
Q$880	P09055	ITB1_MOUSE	Itgb1	Integrin beta-1	1	17.04	9	16226970	9860145	15893922	14876395	1804424	766582	1503637	2008740	24.9	17.4	21.2	30.2	-1.6	0.06	-1	0.9	-1.1	0.9	1.6	0.04	1.5	0.2	-1.1	0.9	0.04
Q$1178	P62204	CALM_MOUSE	Calm1	Calmodulin	1	45.64	7	16176352	8270288	14372901	11735784	297868	733246	911276	1015744	4.1	19.8	14.2	19.4	-2	5e-05	-1.1	0.2	-1.4	0.04	1.7	0.004	1.4	0.07	-1.2	0.2	2e-05
Q$1505	Q64511	TOP2B_MOUSE	Top2b	DNA topoisomerase 2-beta	1	4.96	7	16172026	14680648	15572467	15670604	669539	953937	738961	175785	9.3	14.5	10.6	2.5	-1.1	0.8	-1	0.9	-1	0.9	1.1	0.9	1.1	0.9	1	0.9	0.5
Q$2078	Q9WUP7-2	UCHL5_MOUSE	Uchl	Isoform 2 of Ubiquitin carboxyl-terminal hydrolase isozyme L5	0.9668	3.35	1	16164650	5706215	14865450	12880750	1519362	397959	1800338	2114691	21	15.6	27.1	36.7	-2.8	0.01	-1.1	0.7	-1.3	0.6	2.6	0.03	2.3	0.1	-1.2	0.7	0.001
Q$1552	Q6ZWZ6	Q6ZWZ6_MOUSE	Rps12	40S ribosomal protein S12	1	48.48	7	15877809	9652503	15872212	14797100	1614875	750351	866839	1223980	22.7	17.4	12.2	18.5	-1.6	0.04	-1	1	-1.1	0.9	1.6	0.004	1.5	0.04	-1.1	0.9	0.004
Q$1801	Q99L04	DHRS1_MOUSE	Dhrs1	Dehydrogenase/reductase SDR family member 1	1	49.84	9	15749626	7064169	15097963	13030835	2486684	321248	1081133	1788543	35.3	10.2	16	30.7	-2.2	0.1	-1	0.8	-1.2	0.7	2.1	0.007	1.8	0.1	-1.2	0.7	0.007
Q$110	B1AR09	B1AR09_MOUSE	Mllt6	Protein Mllt6	0.9697	7.6	2	15726322	17193010	17479777	17645154	214312	980079	694571	946403	3	12.7	8.9	12	1.1	0.6	1.1	0.3	1.1	0.4	1	1	1	1	1	1	0.3
Q$1204	P62835	RAP1A_MOUSE	Rap1a	Ras-related protein Rap-1A	1	61.96	9	15597871	8938558	18080226	16343435	799904	941579	2272895	2705390	11.5	23.6	28.1	37	-1.7	0.004	1.2	0.7	1	0.9	2	0.03	1.8	0.1	-1.1	0.9	0.02
Q$1362	Q3U367	Q3U367_MOUSE	Aldh9a1	4-trimethylaminobutyraldehyde dehydrogenase	1	26.06	7	15511050	5952360	12710491	12316857	917709	266645	1592897	1184496	13.2	10	28	21.5	-2.6	0.001	-1.2	0.3	-1.3	0.2	2.1	0.05	2.1	0.02	-1	0.8	0.0001
Q$1720	Q8VDN2	AT1A1_MOUSE	Atp1a1	Sodium/potassium-transporting ATPase subunit alpha-1	1	12.51	9	15503227	9078479	13829633	12849344	1262174	544201	1227144	1437494	18.2	13.4	19.8	25	-1.7	0.01	-1.1	0.6	-1.2	0.5	1.5	0.04	1.4	0.1	-1.1	0.6	0.009
Q$801	O55222	ILK_MOUSE	Ilk	Integrin-linked protein kinase	1	15.93	5	15427003	13547232	17010896	15763284	835719	457977	723966	723448	12.1	7.6	9.5	10.3	-1.1	0.3	1.1	0.5	1	0.8	1.3	0.02	1.2	0.2	-1.1	0.5	0.02
Q$2062	Q9R1P4	PSA1_MOUSE	Psma1	Proteasome subunit alpha type-1	1	40.68	10	15408455	9247880	15129084	13820434	966464	811143	1889979	2132162	14	19.6	27.9	34.5	-1.7	0.007	-1	0.9	-1.1	0.9	1.6	0.1	1.5	0.3	-1.1	0.9	0.05
Q$961	P19253	RL13A_MOUSE	Rpl13a	60S ribosomal protein L13a	1	24.63	5	15369052	5850234	16335402	13355761	1593226	473064	1223642	1800872	23.2	18.1	16.7	30.2	-2.6	0.01	1.1	0.7	-1.2	0.7	2.8	0.0003	2.3	0.05	-1.2	0.5	0.0002
Q$1831	Q9CPQ8	ATP5L_MOUSE	Atp5l	ATP synthase subunit g, mitochondrial	1	71.84	6	15319034	8854393	17317162	13898917	574881	894116	1996479	1444945	8.4	22.6	25.8	23.2	-1.7	0.002	1.1	0.6	-1.1	0.6	2	0.02	1.6	0.07	-1.2	0.5	0.003
Q$1551	Q6ZWX6	IF2A_MOUSE	Eif2s1	Eukaryotic translation initiation factor 2 subunit 1	1	25.08	6	15197656	6721415	12637541	9978411	649921	498363	634455	1143891	9.6	16.6	11.2	25.6	-2.3	4e-05	-1.2	0.07	-1.5	0.02	1.9	0.0004	1.5	0.07	-1.3	0.08	6e-06
Q$1191	P62320	SMD3_MOUSE	Snrpd3	Small nuclear ribonucleoprotein Sm D3	1	47.62	4	14992234	9185197	15515606	13970244	554975	625624	1388414	1103319	8.3	15.2	20	17.7	-1.6	0.0007	1	0.8	-1.1	0.8	1.7	0.02	1.5	0.02	-1.1	0.8	0.001
Q$2046	Q9QZD9	EIF3I_MOUSE	Eif3i	Eukaryotic translation initiation factor 3 subunit I	1	21.85	4	14929111	11247838	14184881	14831651	2223903	2307412	2205294	1497818	33.3	45.9	34.8	22.6	-1.3	0.8	-1.1	1	-1	1	1.3	0.9	1.3	0.8	1	1	0.6
Q$1195	P62717	RL18A_MOUSE	Rpl18a	60S ribosomal protein L18a	1	36.36	7	14915853	9430558	13772693	11614922	634999	749915	974792	1090439	9.5	17.8	15.8	21	-1.6	0.003	-1.1	0.4	-1.3	0.1	1.5	0.04	1.2	0.4	-1.2	0.4	0.002
Q$927	P14869	RLA0_MOUSE	Rplp0	60S acidic ribosomal protein P0	1	54.26	11	14780951	8632478	14804033	13291265	1566042	513013	1386168	1496693	23.7	13.3	20.9	25.2	-1.7	0.03	1	1	-1.1	0.9	1.7	0.02	1.5	0.07	-1.1	0.9	0.01
Q$1442	Q61171	PRDX2_MOUSE	Prdx2	Peroxiredoxin-2	1	38.89	9	14734198	10927018	16142766	14813061	578571	551896	1311388	1440421	8.8	11.3	18.2	21.7	-1.3	0.009	1.1	0.7	1	1	1.5	0.03	1.4	0.1	-1.1	0.8	0.02
Q$1108	P50580	PA2G4_MOUSE	Pa2g4	Proliferation-associated protein 2G4	1	38.58	13	14702148	6293875	17339272	14202268	1992497	585306	2916779	1722630	30.3	20.8	37.6	27.1	-2.3	0.05	1.2	0.8	-1	0.9	2.8	0.07	2.3	0.01	-1.2	0.8	0.007
Q$572	F6SVV1	F6SVV1_MOUSE	Gm9493	Protein Gm9493	1	28.65	7	14697230	7468199	14256664	12114352	527126	589433	1144078	1142939	8	17.6	17.9	21.1	-2	0.0001	-1	0.7	-1.2	0.2	1.9	0.004	1.6	0.03	-1.2	0.4	0.0001
Q$715	H3BL49	H3BL49_MOUSE	Cct8	T-complex protein 1 subunit theta	1	30.06	11	14677912	6229043	13574178	13783027	1856569	431211	1386706	2335219	28.3	15.5	22.8	37.9	-2.4	0.04	-1.1	1	-1.1	1	2.2	0.03	2.2	0.1	1	1	0.008
Q$1254	P70296	PEBP1_MOUSE	Pebp1	Phosphatidylethanolamine-binding protein 1	1	68.98	7	14615123	7915436	14106394	12630848	1072445	392021	1363225	1673744	16.4	11.1	21.6	29.6	-1.8	0.002	-1	0.8	-1.2	0.7	1.8	0.04	1.6	0.2	-1.1	0.8	0.005
Q$510	E9Q3P9	E9Q3P9_MOUSE	Rab11a	Ras-related protein Rab-11A	1	26.8	4	14572350	13434621	12978083	13905839	1197389	989806	2080096	1059671	18.4	16.5	35.8	17	-1.1	1	-1.1	1	-1	1	-1	1	1	1	1.1	1	0.9
Q$2012	Q9JHU4	DYHC1_MOUSE	Dync1h1	Cytoplasmic dynein 1 heavy chain 1	1	4.48	12	14490893	7766181	12344169	11358794	2562841	657806	1288679	1322360	39.5	18.9	23.3	26	-1.9	0.2	-1.2	0.7	-1.3	0.7	1.6	0.08	1.5	0.2	-1.1	0.7	0.06
Q$1924	Q9D1G1	RAB1B_MOUSE	Rab1b	Ras-related protein Rab-1B	1	38.81	6	14471046	6383679	13543020	12860369	880396	530535	1480419	1644969	13.6	18.6	24.4	28.6	-2.3	0.0003	-1.1	0.8	-1.1	0.8	2.1	0.009	2	0.06	-1.1	0.8	0.001
Q$180	D3YVN7	D3YVN7_MOUSE	Gm9755	Elongation factor Tu	1	31.19	11	14461895	5811478	12336904	9374652	5142151	1053004	732052	408391	79.5	40.5	13.3	9.7	-2.5	0.4	-1.2	0.7	-1.5	0.6	2.1	0.006	1.6	0.05	-1.3	0.04	0.2
Q$1082	P47754	CAZA2_MOUSE	Capza2	F-actin-capping protein subunit alpha-2	1	25.17	4	14461598	6840147	14612747	12776992	1354104	493245	1155261	1080164	20.9	16.1	17.7	18.9	-2.1	0.004	1	0.9	-1.1	0.6	2.1	0.002	1.9	0.004	-1.1	0.6	0.0003
Q$2081	Q9WV55	VAPA_MOUSE	Vapa	Vesicle-associated membrane protein-associated protein A	1	34.94	7	14195844	6408302	13981731	14523141	1708377	1151956	2489780	1657980	26.9	40.2	39.8	25.5	-2.2	0.03	-1	1	1	1	2.2	0.1	2.3	0.02	1	1	0.02
Q$587	F6WHQ7	F6WHQ7_MOUSE	Gstm1	Glutathione S-transferase Mu 1 (Fragment)	1	11.86	2	14178918	10651471	13584304	13402215	635241	232790	720119	786931	10	4.9	11.9	13.1	-1.3	0.005	-1	0.8	-1.1	0.8	1.3	0.02	1.3	0.09	-1	0.9	0.005
Q$2097	Q9Z1N5	DX39B_MOUSE	Ddx39b	Spliceosome RNA helicase Ddx39b	1	40.65	13	14148233	6344846	12905669	11263804	754158	239426	1402614	1411227	11.9	8.4	24.3	28	-2.2	0.001	-1.1	0.7	-1.3	0.3	2	0.04	1.8	0.09	-1.1	0.7	0.0005
Q$2092	Q9Z110-2	P5CS_MOUSE	Aldh18a	Isoform Short of Delta-1-pyrroline-5-carboxylate synthase	1	21.06	11	14133355	6761951	12897341	10861697	1108955	240975	1184682	1306836	17.5	8	20.5	26.9	-2.1	0.01	-1.1	0.5	-1.3	0.3	1.9	0.03	1.6	0.1	-1.2	0.5	0.0008
Q$633	F8WIT2	F8WIT2_MOUSE	Anxa6	Annexin	1	21.29	10	14109507	8630024	12146015	11244562	1294753	196479	922582	918212	20.5	5.1	17	18.3	-1.6	0.07	-1.2	0.4	-1.3	0.3	1.4	0.08	1.3	0.2	-1.1	0.5	0.006
Q$1468	Q61881	MCM7_MOUSE	Mcm7	DNA replication licensing factor MCM7	1	12.52	6	14099710	6563053	12577574	12212561	1811511	326464	1207912	2190755	28.7	11.1	21.5	40.1	-2.1	0.06	-1.1	0.9	-1.2	0.9	1.9	0.04	1.9	0.2	-1	0.9	0.02
Q$1938	Q9D646	KRT34_MOUSE	Krt34	Keratin, type I cuticular Ha4	1	17.35	5	14018215	22223190	15326262	16849736	1100131	4861249	1788861	2653326	17.5	48.9	26.1	35.2	1.6	0.7	1.1	0.8	1.2	0.8	-1.5	0.7	-1.3	0.8	1.1	0.8	0.3
Q$1319	Q04447	KCRB_MOUSE	Ckb	Creatine kinase B-type	0.9999	19.95	5	14015952	12671472	15989845	13843047	1726638	2116367	3465707	1873738	27.5	37.3	48.5	30.3	-1.1	1	1.1	1	-1	1	1.3	1	1.1	1	-1.2	1	0.8
Q$1361	Q61316	HSP74_MOUSE	Hspa4	Heat shock 70 kDa protein 4	1	31.51	15	13875332	10869642	13987204	13205166	452528	330998	963315	593551	7.3	6.8	15.4	10.1	-1.3	0.004	1	0.9	-1.1	0.8	1.3	0.06	1.2	0.04	-1.1	0.8	0.01
Q$1726	Q8VEM8	MPCP_MOUSE	Slc25a3	Phosphate carrier protein, mitochondrial	1	23.81	8	13723371	6619278	13900805	12893258	1337760	411867	1402165	863445	21.8	13.9	22.6	15	-2.1	0.02	1	0.9	-1.1	0.9	2.1	0.02	1.9	0.001	-1.1	0.9	0.0005
Q$230	Q62189	SNRPA_MOUSE	Snrpa	U1 small nuclear ribonucleoprotein A	0.9996	16.38	3	13717861	5272545	10682646	8896332	835420	540913	882279	1127164	13.6	22.9	18.5	28.3	-2.6	0.0002	-1.3	0.07	-1.5	0.04	2	0.004	1.7	0.06	-1.2	0.2	4e-05
Q$1188	P62309	RUXG_MOUSE	Snrpg	Small nuclear ribonucleoprotein G	1	57.89	2	13699260	8441690	14458470	13409080	723666	829391	1619457	1135071	11.8	22	25	18.9	-1.6	0.008	1.1	0.9	-1	0.9	1.7	0.04	1.6	0.04	-1.1	0.9	0.007
Q$1618	Q8BLN5	ERG7_MOUSE	Lss	Lanosterol synthase	1	14.6	7	13654214	7836651	9858694	10212375	2585913	1157840	1223050	1610635	42.3	33	27.7	35.3	-1.7	0.4	-1.4	0.7	-1.3	0.7	1.3	0.7	1.3	0.7	1	0.9	0.2
Q$1931	Q9D2G2	ODO2_MOUSE	Dlst	Dihydrolipoyllysine-residue succinyltransferase component of 2-oxoglutarate dehydrogenase complex, mitochondrial	1	21.37	8	13592092	9699032	13479779	12673037	818721	442197	833879	1077603	13.5	10.2	13.8	19	-1.4	0.02	-1	0.9	-1.1	0.9	1.4	0.02	1.3	0.1	-1.1	0.9	0.01
Q$504	E9Q1X1	E9Q1X1_MOUSE	Gm8420	Ribosomal protein L15	1	14.71	3	13540233	8758273	12539787	11663257	582715	442225	750208	979791	9.6	11.3	13.4	18.8	-1.5	0.001	-1.1	0.5	-1.2	0.4	1.4	0.01	1.3	0.1	-1.1	0.5	0.002
Q$1471	Q61990-2	PCBP2_MOUSE	Pcbp	Isoform 2 of Poly(rC)-binding protein 2	1	50.45	10	13347310	8539479	13830794	12835988	680894	725743	1363933	1166401	11.4	19	22.1	20.3	-1.6	0.008	1	0.9	-1	0.9	1.6	0.04	1.5	0.06	-1.1	0.9	0.008
Q$1853	Q9CQM9	GLRX3_MOUSE	Glrx3	Glutaredoxin-3	1	19.88	3	13273773	7802290	8719256	7558547	1370878	1369068	1063758	1249613	23.1	39.2	27.3	37	-1.7	0.1	-1.5	0.1	-1.8	0.09	1.1	0.9	-1	0.9	-1.2	0.9	0.02
Q$1470	Q61990-3	PCBP2_MOUSE	Pcbp	Isoform 3 of Poly(rC)-binding protein 2	1	39.26	9	13257566	8457291	13725527	12740194	675430	726395	1358249	1166829	11.4	19.2	22.1	20.5	-1.6	0.008	1	0.9	-1	0.9	1.6	0.04	1.5	0.06	-1.1	0.9	0.008
Q$1486	Q62425	NDUA4_MOUSE	Ndufa4	NADH dehydrogenase [ubiquinone] 1 alpha subcomplex subunit 4	1	37.8	4	13238954	6134142	12347959	11278226	712735	349728	1233600	1512501	12	12.7	22.3	30	-2.2	0.0001	-1.1	0.8	-1.2	0.6	2	0.03	1.8	0.1	-1.1	0.8	0.0009
Q$1597	Q8BH59	CMC1_MOUSE	Slc25a12	Calcium-binding mitochondrial carrier protein Aralar1	1	24.96	12	13234269	7739968	13079947	12445821	289296	519196	1377898	1819337	4.9	15	23.6	32.7	-1.7	9e-05	-1	1	-1.1	1	1.7	0.03	1.6	0.2	-1.1	1	0.01
Q$1300	P97821	CATC_MOUSE	Ctsc	Dipeptidyl peptidase 1	1	20.13	8	13227163	5972640	12443617	11200908	698947	57890	1015068	443413	11.8	2.2	18.2	8.9	-2.2	0.002	-1.1	0.5	-1.2	0.1	2.1	0.01	1.9	0.002	-1.1	0.5	3e-06
Q$788	O35690	PHX2B_MOUSE	Phox2b	Paired mesoderm homeobox protein 2B	0.9805	20.7	1	13216280	18392400	21654500	24034700	1379278	1939807	2391003	1624283	23.3	23.6	24.7	15.1	1.4	0.2	1.6	0.08	1.8	0.006	1.2	0.5	1.3	0.2	1.1	0.5	0.005
Q$137	Q8BG05	ROA3_MOUSE	Hnrnpa3	Isoform 2 of Heterogeneous nuclear ribonucleoprotein A3	1	27.07	13	13204530	5598430	11802675	9799922	489915	775444	1370419	1104747	8.3	31	26	25.2	-2.4	0.0002	-1.1	0.5	-1.3	0.07	2.1	0.02	1.8	0.06	-1.2	0.5	0.0003
Q$960	P19157	GSTP1_MOUSE	Gstp1	Glutathione S-transferase P 1	1	67.14	7	13183047	10638366	13997508	12928844	728800	1500811	717077	640582	12.4	31.5	11.5	11.1	-1.2	0.6	1.1	0.7	-1	0.8	1.3	0.4	1.2	0.6	-1.1	0.7	0.1
Q$1189	P62315	SMD1_MOUSE	Snrpd1	Small nuclear ribonucleoprotein Sm D1	1	54.62	6	12974055	8525557	14380476	13060127	647657	398665	1147680	1237064	11.2	10.5	17.8	21.2	-1.5	0.002	1.1	0.7	1	1	1.7	0.007	1.5	0.07	-1.1	0.7	0.002
Q$1190	P62317	SMD2_MOUSE	Snrpd2	Small nuclear ribonucleoprotein Sm D2	1	55.93	7	12957810	6149615	14757659	12782466	1151050	696727	1625973	957839	19.9	25.3	24.6	16.8	-2.1	0.005	1.1	0.7	-1	0.9	2.4	0.005	2.1	0.003	-1.2	0.7	0.0004
Q$1915	Q9D0T1	NH2L1_MOUSE	Nhp2l1	NHP2-like protein 1	1	37.5	3	12950740	8125393	12935192	12782770	1010129	757500	1566043	995290	17.4	20.8	27.1	17.4	-1.6	0.03	-1	1	-1	1	1.6	0.09	1.6	0.03	-1	1	0.02
Q$1073	P46061	RAGP1_MOUSE	Rangap1	Ran GTPase-activating protein 1	1	21.05	7	12738313	6298618	13539607	10580696	1192683	464609	2081852	1212723	20.9	16.5	34.4	25.6	-2	0.006	1.1	0.7	-1.2	0.6	2.1	0.09	1.7	0.05	-1.3	0.6	0.008
Q$719	H3BLL4	H3BLL4_MOUSE	Hnrnpk	Heterogeneous nuclear ribonucleoprotein K	1	41.12	14	12644510	7467035	11997879	10887829	368503	584226	1201727	827854	6.5	17.5	22.4	17	-1.7	0.0004	-1.1	0.7	-1.2	0.2	1.6	0.05	1.5	0.05	-1.1	0.7	0.002
Q$211	Q91V55	Q91V55_MOUSE	Rps5	40S ribosomal protein S5	1	50.49	9	12639804	8595146	14409084	12548104	282669	609026	1103630	870996	5	15.8	17.1	15.5	-1.5	0.002	1.1	0.5	-1	0.9	1.7	0.009	1.5	0.02	-1.1	0.5	0.0006
Q$1571	Q80UU9	PGRC2_MOUSE	Pgrmc2	Membrane-associated progesterone receptor component 2	1	21.66	3	12630820	12396285	13247729	12206002	477298	930184	806558	586971	8.4	16.8	13.6	10.8	-1	1	1	1	-1	1	1.1	1	-1	1	-1.1	0.9	0.8
Q$1764	Q922F4	TBB6_MOUSE	Tubb6	Tubulin beta-6 chain	1	15.44	6	12619848	7559557	13123153	12266597	984096	655185	827628	926665	17.4	19.4	14.1	16.9	-1.7	0.01	1	0.9	-1	0.9	1.7	0.005	1.6	0.01	-1.1	0.9	0.001
Q$1420	Q60749	KHDR1_MOUSE	Khdrbs1	KH domain-containing, RNA-binding, signal transduction-associated protein 1	0.9998	12.19	3	12520248	6704867	12901407	12698602	693877	524813	738621	859076	12.4	17.5	12.8	15.1	-1.9	0.0008	1	1	1	1	1.9	0.0008	1.9	0.001	-1	1	2e-05
Q$1308	Q00PI9	HNRL2_MOUSE	Hnrnpul2	Heterogeneous nuclear ribonucleoprotein U-like protein 2	1	13.96	6	12410686	5050608	10883585	8799788	424332	277048	1168058	934706	7.6	12.3	24	23.8	-2.5	3e-06	-1.1	0.4	-1.4	0.03	2.2	0.03	1.7	0.04	-1.2	0.4	4e-05
Q$253	D3Z4A4	D3Z4A4_MOUSE	Prdx2	Peroxiredoxin-2 (Fragment)	1	44.9	4	12401375	9328384	12841816	11821127	411707	555572	1100205	1207010	7.4	13.3	19.2	22.8	-1.3	0.01	1	0.9	-1	0.9	1.4	0.1	1.3	0.3	-1.1	0.9	0.05
Q$1355	Q3TW96	UAP1L_MOUSE	Uap1l1	UDP-N-acetylhexosamine pyrophosphorylase-like protein 1	1	11.05	4	12352894	4604078	5755790	10326445	2872443	989291	1095121	3964245	52	48	42.5	85.8	-2.7	0.2	-2.1	0.3	-1.2	0.7	1.3	0.7	2.2	0.6	1.8	0.7	0.1
Q$653	Q60930	VDAC2_MOUSE	Vdac2	Voltage-dependent anion-selective channel protein 2	1	40.68	10	12321956	6247067	12262089	11862787	915232	383894	1374814	1146230	16.6	13.7	25.1	21.6	-2	0.002	-1	1	-1	1	2	0.04	1.9	0.008	-1	1	0.001
Q$2045	Q9QZ82	CP11A_MOUSE	Cyp11a1	Cholesterol side-chain cleavage enzyme, mitochondrial	1	10.27	4	12184952	7314552	7939458	5534617	3032233	1487797	1741642	423451	55.6	45.5	49.1	17.1	-1.7	0.6	-1.5	0.7	-2.2	0.4	1.1	0.8	-1.3	0.7	-1.4	0.7	0.1
Q$1187	P62307	RUXF_MOUSE	Snrpf	Small nuclear ribonucleoprotein F	1	65.12	3	12169142	7678924	11677292	10333699	1371628	679227	1011870	837095	25.2	19.8	19.4	18.1	-1.6	0.09	-1	0.8	-1.2	0.6	1.5	0.07	1.3	0.1	-1.1	0.6	0.03
Q$1834	Q9CPU0	LGUL_MOUSE	Glo1	Lactoylglutathione lyase	1	24.46	3	12151210	5790117	12637630	9892590	670425	805533	744752	488553	12.3	31.1	13.2	11	-2.1	0.001	1	0.6	-1.2	0.05	2.2	0.001	1.7	0.01	-1.3	0.04	1e-05
Q$488	P14869	RLA0_MOUSE	Rplp0	60S acidic ribosomal protein P0	1	43.22	11	12075810	6225238	12578351	10676997	1139711	269721	1357594	1236255	21.1	9.7	24.1	25.9	-1.9	0.03	1	0.8	-1.1	0.7	2	0.04	1.7	0.08	-1.2	0.7	0.003
Q$1315	Q02257	PLAK_MOUSE	Jup	Junction plakoglobin	1	11.01	5	12069119	6588900	10213492	9666433	937212	390170	1027646	625099	17.4	13.2	22.5	14.5	-1.8	0.004	-1.2	0.4	-1.2	0.2	1.6	0.04	1.5	0.02	-1.1	0.7	0.001
Q$1708	Q8R5L1	Q8R5L1_MOUSE	C1qbp	Complement component 1 Q subcomponent-binding protein, mitochondrial	1	46.95	8	12060619	10636219	11737835	14809436	433643	328660	609780	1478775	8	6.9	11.6	22.3	-1.1	0.2	-1	0.7	1.2	0.4	1.1	0.4	1.4	0.2	1.3	0.3	0.02
Q$644	G3UWA6	G3UWA6_MOUSE	Slc3a2	4F2 cell-surface antigen heavy chain	1	23.89	9	12014384	8273918	11894383	11481765	1056269	171537	1139831	1399794	19.7	4.6	21.4	27.3	-1.5	0.1	-1	1	-1	1	1.4	0.2	1.4	0.3	-1	1	0.07
Q$191	P47963	RL13_MOUSE	Rpl13	60S ribosomal protein L13	1	13.27	3	12003625	5515350	12095870	10773110	1117690	479280	1356779	1121327	20.8	19.4	25.1	23.3	-2.2	0.004	1	1	-1.1	0.8	2.2	0.009	2	0.01	-1.1	0.8	0.001
Q$1241	P67984	RL22_MOUSE	Rpl22	60S ribosomal protein L22	1	51.56	6	11847253	5635587	12436904	10322064	726114	850672	1805146	986244	13.7	33.8	32.5	21.4	-2.1	0.003	1	0.8	-1.1	0.6	2.2	0.04	1.8	0.03	-1.2	0.6	0.003
Q$588	P61082	UBC12_MOUSE	Ube2m	NEDD8-conjugating enzyme Ubc12	0.9999	13.11	2	11844966	4823858	13983473	11973015	2737968	1386552	996591	1970863	51.7	64.3	15.9	36.8	-2.5	0.2	1.2	0.8	1	1	2.9	0.004	2.5	0.09	-1.2	0.8	0.02
Q$1208	P62855	RS26_MOUSE	Rps26	40S ribosomal protein S26	1	7.83	1	11815330	3272350	10187480	6827020	381380	682767	1846028	342178	7.2	46.7	40.5	11.2	-3.6	3e-05	-1.2	0.4	-1.7	5e-05	3.1	0.02	2.1	0.007	-1.5	0.3	0.0001
Q$1986	Q9DCN2-2	NB5R3_MOUSE	Cyb5r	Isoform 2 of NADH-cytochrome b5 reductase 3	1	53.6	10	11807373	4675119	10726801	9428950	586281	433241	1132892	896852	11.1	20.7	23.6	21.3	-2.5	6e-05	-1.1	0.6	-1.3	0.2	2.3	0.005	2	0.006	-1.1	0.6	6e-05
Q$1689	Q8K557	ONEC3_MOUSE	Onecut3	One cut domain family member 3	1	27.55	5	11670910	17804694	14973946	13752853	2139386	4013824	3770752	2762360	41	50.4	56.3	44.9	1.5	0.8	1.3	0.9	1.2	0.9	-1.2	0.9	-1.3	0.9	-1.1	0.9	0.6
Q$1130	P54823	DDX6_MOUSE	Ddx6	Probable ATP-dependent RNA helicase DDX6	0.9999	11.8	3	11634471	5113016	11329371	10848004	597027	718672	1224739	1677177	11.5	31.4	24.2	34.6	-2.3	0.0007	-1	1	-1.1	1	2.2	0.01	2.1	0.05	-1	1	0.003
Q$1424	Q60932-2	VDAC1_MOUSE	Vdac	Isoform Mt-VDAC1 of Voltage-dependent anion-selective channel protein 1	1	58.66	13	11541333	7091791	11835061	11368120	607267	287253	849854	836919	11.8	9.1	16.1	16.5	-1.6	0.001	1	1	-1	1	1.7	0.004	1.6	0.005	-1	1	0.0004
Q$1295	P97450	ATP5J_MOUSE	Atp5j	ATP synthase-coupling factor 6, mitochondrial	1	43.52	4	11504829	5577822	9878098	9232496	1285243	288172	519232	1220204	25	11.6	11.8	29.6	-2.1	0.04	-1.2	0.6	-1.2	0.6	1.8	0.0005	1.7	0.1	-1.1	0.6	0.003
Q$1516	Q6GQT9	NOMO1_MOUSE	Nomo1	Nodal modulator 1	1	6.84	5	11503573	6878217	11742416	11542274	803672	371677	697480	842740	15.6	12.1	13.3	16.3	-1.7	0.004	1	1	1	1	1.7	0.002	1.7	0.004	-1	1	0.0003
Q$1692	Q8QZY9	SF3B4_MOUSE	Sf3b4	Splicing factor 3B subunit 4	1	10.61	3	11430951	6436711	11064367	9047563	728991	332920	796502	810677	14.3	11.6	16.1	20	-1.8	0.002	-1	0.7	-1.3	0.2	1.7	0.003	1.4	0.07	-1.2	0.2	0.0004
Q$1453	Q61598	GDIB_MOUSE	Gdi2	Rab GDP dissociation inhibitor beta	1	40.67	14	11381807	6349798	11558335	10208094	657568	539604	1176121	651616	12.9	19	22.8	14.3	-1.8	0.002	1	0.9	-1.1	0.6	1.8	0.02	1.6	0.009	-1.1	0.6	0.0009
Q$1034	P34022	RANG_MOUSE	Ranbp1	Ran-specific GTPase-activating protein	1	42.36	8	11372576	4763567	9297372	8439275	1128205	220294	1120739	875384	22.2	10.3	27	23.2	-2.4	0.02	-1.2	0.4	-1.3	0.2	2	0.06	1.8	0.06	-1.1	0.6	0.0009
Q$1860	Q9CQV8-2	1433B_MOUSE	Ywha	Isoform Short of 14-3-3 protein beta/alpha	1	52.46	11	11243404	6862120	11574394	10327712	770479	180234	1307543	1122010	15.3	5.9	25.3	24.3	-1.6	0.02	1	0.9	-1.1	0.9	1.7	0.1	1.5	0.1	-1.1	0.9	0.01
Q$1529	Q6P5E4	UGGG1_MOUSE	Uggt1	UDP-glucose:glycoprotein glucosyltransferase 1	1	11.48	9	11227157	7718631	12931529	10597325	1305356	507693	1381458	1326717	26	14.7	23.9	28	-1.5	0.2	1.2	0.6	-1.1	0.7	1.7	0.04	1.4	0.3	-1.2	0.6	0.05
Q$1203	P62830	RL23_MOUSE	Rpl23	60S ribosomal protein L23	1	35.71	5	11195242	7310891	13885340	10704821	580146	1634736	2218138	967644	11.6	50	35.7	20.2	-1.5	0.2	1.2	0.5	-1	0.7	1.9	0.2	1.5	0.4	-1.3	0.5	0.05
Q$886	P09671	SODM_MOUSE	Sod2	Superoxide dismutase [Mn], mitochondrial	1	39.64	5	11175537	7353031	11317751	10039455	630093	788088	861794	1285782	12.6	24	17	28.6	-1.5	0.03	1	0.9	-1.1	0.8	1.5	0.05	1.4	0.4	-1.1	0.8	0.03
Q$1671	Q8JZQ9	EIF3B_MOUSE	Eif3b	Eukaryotic translation initiation factor 3 subunit B	1	19.55	8	11111515	6127379	11451502	10538971	908517	436858	1372301	1226761	18.3	15.9	26.8	26	-1.8	0.007	1	1	-1.1	1	1.9	0.06	1.7	0.05	-1.1	1	0.008
Q$786	O35658	C1QBP_MOUSE	C1qbp	Complement component 1 Q subcomponent-binding protein, mitochondrial	1	39.93	7	11063743	9775654	10713655	13844292	420635	343504	566738	1477312	8.5	7.9	11.8	23.9	-1.1	0.2	-1	0.6	1.3	0.4	1.1	0.4	1.4	0.2	1.3	0.3	0.02
Q$1461	Q61753	SERA_MOUSE	Phgdh	D-3-phosphoglycerate dehydrogenase	1	25.14	9	11012692	5429955	10962503	9938865	1139837	583464	972628	1273961	23.1	24	19.8	28.7	-2	0.01	-1	1	-1.1	0.9	2	0.007	1.8	0.05	-1.1	0.9	0.004
Q$1196	P62746	RHOB_MOUSE	Rhob	Rho-related GTP-binding protein RhoB	1	16.84	3	10972790	7588870	12649120	11284380	878462	813439	1474488	705291	17.9	24	26.1	14	-1.4	0.09	1.2	0.7	1	0.8	1.7	0.08	1.5	0.05	-1.1	0.7	0.02
Q$1176	P62192	PRS4_MOUSE	Psmc1	26S protease regulatory subunit 4	1	25.68	8	10971917	5593285	10683849	9724524	1213319	578562	1261959	872361	24.7	23.1	26.4	20.1	-2	0.02	-1	0.9	-1.1	0.8	1.9	0.03	1.7	0.02	-1.1	0.8	0.006
Q$891	P10518	HEM2_MOUSE	Alad	Delta-aminolevulinic acid dehydratase	1	45.45	9	10958228	5022521	13257463	11547023	1563942	260874	1446873	1481781	31.9	11.6	24.4	28.7	-2.2	0.07	1.2	0.7	1.1	0.8	2.6	0.02	2.3	0.05	-1.1	0.7	0.002
Q$1667	Q8CIN4	PAK2_MOUSE	Pak2	Serine/threonine-protein kinase PAK 2	1	31.87	8	10927807	6310433	11185055	10249604	667150	305884	1257840	1325815	13.7	10.8	25.1	28.9	-1.7	0.001	1	0.9	-1.1	0.9	1.8	0.08	1.6	0.1	-1.1	0.9	0.01
Q$1353	Q3TTY5	K22E_MOUSE	Krt2	Keratin, type II cytoskeletal 2 epidermal	1	5.09	4	10887365	5103739	8073864	8350636	4520017	1601964	2483111	3019937	92.8	70.2	68.8	80.9	-2.1	0.8	-1.3	0.9	-1.3	0.9	1.6	0.9	1.6	0.9	1	0.9	0.6
Q$2077	Q9WUM5	SUCA_MOUSE	Suclg1	Succinyl-CoA ligase [ADP/GDP-forming] subunit alpha, mitochondrial	1	19.36	5	10857286	6196845	11883222	11359017	687862	489088	676284	955674	14.2	17.6	12.7	18.8	-1.8	0.003	1.1	0.7	1	0.9	1.9	0.0008	1.8	0.005	-1	0.9	0.0001
Q$1480	Q62318	TIF1B_MOUSE	Trim28	Transcription intermediary factor 1-beta	1	14.99	8	10851447	6709572	10280381	8866200	861288	433036	600744	807029	17.7	14.4	13.1	20.4	-1.6	0.01	-1.1	0.6	-1.2	0.3	1.5	0.008	1.3	0.2	-1.2	0.4	0.003
Q$807	O70252	HMOX2_MOUSE	Hmox2	Heme oxygenase 2	1	36.83	10	10841799	4517740	9134991	7581546	1112640	353860	1434619	1119639	22.9	17.5	35.1	33	-2.4	0.02	-1.2	0.6	-1.4	0.2	2	0.1	1.7	0.2	-1.2	0.6	0.005
Q$1664	Q8CI43	MYL6B_MOUSE	Myl6b	Myosin light chain 6B	1	10.14	2	10820050	4257887	8965380	7709530	864664	821510	1187901	1104539	17.9	43.1	29.6	32	-2.5	0.003	-1.2	0.4	-1.4	0.2	2.1	0.06	1.8	0.1	-1.2	0.5	0.002
Q$1237	P63323	RS12_MOUSE	Rps12	40S ribosomal protein S12	1	36.36	4	10759042	7508034	11207514	10278962	1228288	716533	538041	879312	25.5	21.3	10.7	19.1	-1.4	0.2	1	0.9	-1	0.9	1.5	0.02	1.4	0.2	-1.1	0.8	0.04
Q$1251	P70168	IMB1_MOUSE	Kpnb1	Importin subunit beta-1	1	14.27	8	10724805	6364874	11714621	10327344	467469	456316	856006	1220361	9.7	16	16.3	26.4	-1.7	0.0009	1.1	0.7	-1	0.8	1.8	0.003	1.6	0.06	-1.1	0.7	0.001
Q$1971	Q9DBP5	KCY_MOUSE	Cmpk1	UMP-CMP kinase	1	43.37	6	10684141	9080317	9620900	10243953	1059500	860481	461187	1397030	22.2	21.2	10.7	30.5	-1.2	0.9	-1.1	0.9	-1	0.9	1.1	0.9	1.1	0.9	1.1	0.9	0.7
Q$1762	Q922B2	SYDC_MOUSE	Dars	Aspartate--tRNA ligase, cytoplasmic	1	19.16	8	10629155	5320652	10533267	8417322	757428	280616	1313464	662598	15.9	11.8	27.9	17.6	-2	0.001	-1	1	-1.3	0.2	2	0.06	1.6	0.01	-1.3	0.3	0.001
Q$1757	Q920E5	FPPS_MOUSE	Fdps	Farnesyl pyrophosphate synthase	1	25.21	6	10610188	5168384	10362450	9078244	778145	428746	825491	987266	16.4	18.5	17.8	24.3	-2.1	0.002	-1	0.8	-1.2	0.6	2	0.003	1.8	0.03	-1.1	0.6	0.0005
Q$1321	Q04750	TOP1_MOUSE	Top1	DNA topoisomerase 1	1	16.04	9	10591914	5858631	10346658	9244322	1260508	217307	1150341	1200725	26.6	8.3	24.9	29	-1.8	0.09	-1	0.9	-1.1	0.8	1.8	0.09	1.6	0.2	-1.1	0.8	0.02
Q$1299	P97807-2	FUMH_MOUSE	F	Isoform Cytoplasmic of Fumarate hydratase, mitochondrial	1	50.32	13	10511568	5507608	11175367	10044017	750823	108409	755189	1052928	16	4.4	15.1	23.4	-1.9	0.01	1.1	0.8	-1	0.8	2	0.009	1.8	0.05	-1.1	0.8	0.0003
Q$1004	P27048	RSMB_MOUSE	Snrpb	Small nuclear ribonucleoprotein-associated protein B	1	19.48	5	10505047	6947622	11259744	9851184	489727	465993	880208	700521	10.4	15	17.5	15.9	-1.5	0.005	1.1	0.7	-1.1	0.7	1.6	0.01	1.4	0.03	-1.1	0.6	0.002
Q$2010	Q9JHI5	IVD_MOUSE	Ivd	Isovaleryl-CoA dehydrogenase, mitochondrial	1	16.75	4	10436127	7161033	15023895	10731432	1314672	915287	1922900	240601	28.2	28.6	28.6	5	-1.5	0.3	1.4	0.3	1	0.8	2.1	0.04	1.5	0.07	-1.4	0.3	0.004
Q$285	D3Z7W7	D3Z7W7_MOUSE	Rps3a3	40S ribosomal protein S3a	1	30.68	8	10374388	5719113	11071065	9689752	407629	570561	1109852	747820	8.8	22.3	22.4	17.3	-1.8	0.001	1.1	0.7	-1.1	0.7	1.9	0.01	1.7	0.01	-1.1	0.7	0.0006
Q$1811	Q99LX0	PARK7_MOUSE	Park7	Protein DJ-1	1	47.09	9	10305026	6695965	10948650	9116165	740554	353412	1044798	787230	16.1	11.8	21.3	19.3	-1.5	0.01	1.1	0.6	-1.1	0.5	1.6	0.02	1.4	0.09	-1.2	0.5	0.007
Q$1466	Q61830	MRC1_MOUSE	Mrc1	Macrophage mannose receptor 1	0.9974	3.85	4	10228887	4435039	10122862	8665869	550643	419750	1528225	1081374	12	21.2	33.8	27.9	-2.3	0.0002	-1	0.9	-1.2	0.6	2.3	0.07	2	0.03	-1.2	0.7	0.003
Q$1410	Q60597-2	ODO1_MOUSE	Ogd	Isoform 2 of 2-oxoglutarate dehydrogenase, mitochondrial	1	21.13	14	10227313	5186546	9672654	8120756	516785	363044	1021457	762080	11.3	15.7	23.6	21	-2	0.0003	-1.1	0.6	-1.3	0.1	1.9	0.02	1.6	0.03	-1.2	0.4	0.0006
Q$1996	Q9EQP2	EHD4_MOUSE	Ehd4	EH domain-containing protein 4	1	10.91	5	10224282	7118518	16989931	12091861	651769	648167	667247	530458	14.3	20.4	8.8	9.8	-1.4	0.02	1.7	0.0004	1.2	0.06	2.4	3e-05	1.7	0.001	-1.4	0.001	6e-08
Q$1408	Q5XJF6	Q5XJF6_MOUSE	Rpl10a	Ribosomal protein	1	34.56	6	10198326	4458361	10705668	9577755	852099	411509	1228311	1397668	18.7	20.6	25.7	32.6	-2.3	0.002	1	0.9	-1.1	0.9	2.4	0.007	2.1	0.07	-1.1	0.9	0.002
Q$202	D3YXU1	D3YXU1_MOUSE	Hadhb	Trifunctional enzyme subunit beta, mitochondrial (Fragment)	1	20.81	3	10166614	6740405	8988941	8178987	1280278	1885910	2128042	1549289	28.2	62.6	52.9	42.4	-1.5	0.7	-1.1	0.9	-1.2	0.9	1.3	0.9	1.2	0.9	-1.1	0.9	0.6
Q$787	O35685	NUDC_MOUSE	Nudc	Nuclear migration protein nudC	1	6.02	2	10155480	2997655	8301200	6873510	1026083	460212	765849	661147	22.6	34.3	20.6	21.5	-3.4	0.001	-1.2	0.3	-1.5	0.08	2.8	0.002	2.3	0.005	-1.2	0.3	4e-05
Q$980	P23116	EIF3A_MOUSE	Eif3a	Eukaryotic translation initiation factor 3 subunit A	1	6.18	6	10155428	5306053	8380388	8337810	302578	711319	1367735	1206739	6.7	30	36.5	32.4	-1.9	0.001	-1.2	0.5	-1.2	0.5	1.6	0.3	1.6	0.3	-1	1	0.02
Q$1962	Q9DB15	RM12_MOUSE	Mrpl12	39S ribosomal protein L12, mitochondrial	1	31.34	5	10124253	7530695	12328561	11861454	266293	535644	1325051	879758	5.9	15.9	24	16.6	-1.3	0.01	1.2	0.3	1.2	0.3	1.6	0.04	1.6	0.01	-1	0.8	0.004
Q$1423	Q60865	CAPR1_MOUSE	Caprin1	Caprin-1	1	14.71	7	10069860	6502826	10719629	9787301	724395	379729	950831	991521	16.1	13.1	19.8	22.7	-1.5	0.01	1.1	0.9	-1	0.9	1.6	0.02	1.5	0.06	-1.1	0.9	0.008
Q$2099	Q9Z1Q9	SYVC_MOUSE	Vars	Valine--tRNA ligase	1	14.65	10	10021409	5821073	13554426	10185092	1510793	977132	1829358	467058	33.7	37.5	30.2	10.3	-1.7	0.2	1.4	0.4	1	0.9	2.3	0.03	1.7	0.02	-1.3	0.4	0.007
Q$709	H3BKH6	H3BKH6_MOUSE	Esd	S-formylglutathione hydrolase	1	51.19	13	9977297	4773018	11204540	8641017	628934	407116	1035784	497374	14.1	19.1	20.7	12.9	-2.1	0.0007	1.1	0.3	-1.2	0.3	2.3	0.002	1.8	0.002	-1.3	0.2	4e-05
Q$2113	Q9Z2X1-2	HNRPF_MOUSE	Hnrnp	Isoform 2 of Heterogeneous nuclear ribonucleoprotein F	1	33.16	8	9968792	5418443	9497142	8171290	792750	198296	802245	675874	17.8	8.2	18.9	18.5	-1.8	0.02	-1	0.7	-1.2	0.3	1.8	0.03	1.5	0.05	-1.2	0.4	0.0008
Q$505	E9Q1Y9	E9Q1Y9_MOUSE	5430421N21Rik	Protein 5430421N21Rik	1	21.09	16	9939921	47356139	9955360	21084952	353687	20080468	839737	12123750	8	94.8	18.9	128.6	4.8	0.6	1	1	2.1	0.8	-4.8	0.6	-2.2	0.8	2.1	0.8	0.1
Q$1120	P53026	RL10A_MOUSE	Rpl10a	60S ribosomal protein L10a	1	27.19	5	9921440	4180702	10336004	9087211	826488	406321	1199651	1373954	18.6	21.7	26	33.8	-2.4	0.002	1	0.9	-1.1	0.9	2.5	0.006	2.2	0.08	-1.1	0.9	0.002
Q$1126	P54116	STOM_MOUSE	Stom	Erythrocyte band 7 integral membrane protein	0.9999	14.08	3	9861923	4652805	11103848	9720642	244019	624836	1072101	647088	5.5	30	21.6	14.9	-2.1	0.0003	1.1	0.7	-1	0.8	2.4	0.003	2.1	0.002	-1.1	0.7	4e-05
Q$1802	Q99L13	3HIDH_MOUSE	Hibadh	3-hydroxyisobutyrate dehydrogenase, mitochondrial	1	18.51	4	9839883	3667945	9951250	8373638	798241	478498	2024341	1594436	18.1	29.2	45.5	42.6	-2.7	0.001	1	1	-1.2	0.8	2.7	0.2	2.3	0.2	-1.2	0.8	0.02
Q$1364	Q3U741	Q3U741_MOUSE	Ddx17	DEAD (Asp-Glu-Ala-Asp) box polypeptide 17, isoform CRA_a	1	19.48	11	9835423	4383592	8119397	8605751	1736122	1063243	1014601	1661636	39.5	54.2	27.9	43.2	-2.2	0.2	-1.2	0.8	-1.1	0.9	1.9	0.2	2	0.2	1.1	0.9	0.07
Q$2050	Q9QZQ8	H2AY_MOUSE	H2afy	Core histone macro-H2A.1	1	35.75	7	9802129	4941376	10311713	9600807	638446	367977	931643	811637	14.6	16.7	20.2	18.9	-2	0.001	1.1	0.9	-1	0.9	2.1	0.003	1.9	0.003	-1.1	0.9	0.0002
Q$2054	Q9R0P5	DEST_MOUSE	Dstn	Destrin	1	36.97	5	9797208	4435299	8694630	7749751	368233	244085	862377	835616	8.4	12.3	22.2	24.1	-2.2	1e-05	-1.1	0.5	-1.3	0.2	2	0.03	1.7	0.06	-1.1	0.5	0.0001
Q$790	O35744	CHIL3_MOUSE	Chi3l3	Chitinase-3-like protein 3	1	19.85	6	9792955	4437199	9633686	7243409	958103	385322	710732	773707	21.9	19.4	16.5	23.9	-2.2	0.004	-1	0.9	-1.4	0.1	2.2	0.001	1.6	0.05	-1.3	0.1	0.0003
Q$1614	Q8BKC5	IPO5_MOUSE	Ipo5	Importin-5	1	11.39	8	9771468	5948215	10638300	9857941	614214	432135	963535	879703	14.1	16.2	20.3	20	-1.6	0.006	1.1	0.9	1	0.9	1.8	0.01	1.7	0.02	-1.1	0.9	0.002
Q$1620	Q8BMF4	ODP2_MOUSE	Dlat	Dihydrolipoyllysine-residue acetyltransferase component of pyruvate dehydrogenase complex, mitochondrial	1	16.04	7	9742559	4926997	9309378	8687371	768152	336174	1001929	730488	17.6	15.3	24.1	18.8	-2	0.003	-1	0.9	-1.1	0.7	1.9	0.01	1.8	0.008	-1.1	0.9	0.001
Q$1593	Q8BGJ5	Q8BGJ5_MOUSE	Ptbp1	MCG13402, isoform CRA_a	1	43.86	16	9734467	5893163	10220538	9782640	657608	322361	1460624	1330945	15.1	12.2	32	30.4	-1.7	0.005	1	1	1	1	1.7	0.2	1.7	0.2	-1	1	0.03
Q$1454	Q61598-2	GDIB_MOUSE	Gdi	Isoform 2 of Rab GDP dissociation inhibitor beta	1	37.9	13	9722413	5579508	9033635	8025544	532649	497680	1019983	599459	12.3	19.9	25.2	16.7	-1.7	0.003	-1.1	0.7	-1.2	0.2	1.6	0.07	1.4	0.07	-1.1	0.7	0.004
Q$1112	P51660	DHB4_MOUSE	Hsd17b4	Peroxisomal multifunctional enzyme type 2	1	17.82	9	9706613	5668046	9171880	9010443	1111315	342184	767285	692047	25.6	13.5	18.7	17.2	-1.7	0.08	-1.1	0.9	-1.1	0.9	1.6	0.02	1.6	0.01	-1	0.9	0.008
Q$767	O09061	PSB1_MOUSE	Psmb1	Proteasome subunit beta type-1	1	35	6	9675396	5988839	8956722	8294313	517269	350896	334085	449443	12	13.1	8.3	12.1	-1.6	0.002	-1.1	0.5	-1.2	0.2	1.5	0.002	1.4	0.01	-1.1	0.5	8e-05
Q$27	A2AE38	A2AE38_MOUSE	Amigo1	Amphoterin-induced protein 1 (Fragment)	0.9018	2.4	1	9675030	11945610	9412790	9142090	792664	974509	764095	677656	18.3	18.2	18.2	16.6	1.2	0.4	-1	1	-1.1	0.9	-1.3	0.3	-1.3	0.2	-1	1	0.09
Q$1016	Q9CPX4	Q9CPX4_MOUSE	Ftl1	Ferritin	1	52.46	9	9663718	5582368	8041238	7991780	1622559	425661	1078203	1096148	37.5	17.1	30	30.7	-1.7	0.3	-1.2	0.8	-1.2	0.8	1.4	0.3	1.4	0.3	-1	1	0.1
Q$1758	Q921F2	TADBP_MOUSE	Tardbp	TAR DNA-binding protein 43	1	39.37	9	9656424	4148132	8840238	7738314	794665	334496	999241	998666	18.4	18	25.3	28.9	-2.3	0.001	-1.1	0.7	-1.2	0.4	2.1	0.01	1.9	0.04	-1.1	0.7	0.001
Q$825	O88696	CLPP_MOUSE	Clpp	Putative ATP-dependent Clp protease proteolytic subunit, mitochondrial	1	16.54	3	9645974	5751637	12042784	10983253	856993	660029	1587319	931834	19.9	25.7	29.5	19	-1.7	0.03	1.2	0.5	1.1	0.5	2.1	0.03	1.9	0.01	-1.1	0.6	0.004
Q$1006	P27661	H2AX_MOUSE	H2afx	Histone H2AX	1	55.94	11	9601454	7221055	15452325	11278085	1064208	1117320	1472880	207065	24.8	34.6	21.3	4.1	-1.3	0.3	1.6	0.06	1.2	0.3	2.1	0.01	1.6	0.08	-1.4	0.1	0.0005
Q$1350	Q3TML0	Q3TML0_MOUSE	Pdia6	Protein disulfide-isomerase A6	1	22.02	5	9566703	4569763	8708115	7841526	841449	225700	757334	911995	19.7	11	19.4	26	-2.1	0.02	-1.1	0.7	-1.2	0.5	1.9	0.02	1.7	0.08	-1.1	0.7	0.001
Q$1487	Q62426	CYTB_MOUSE	Cstb	Cystatin-B	1	21.43	2	9487117	3546908	7217289	5676669	572319	315629	800564	850935	13.5	19.9	24.8	33.5	-2.7	0.0001	-1.3	0.1	-1.7	0.02	2	0.01	1.6	0.1	-1.3	0.2	0.0001
Q$1883	Q9CX86	ROA0_MOUSE	Hnrnpa0	Heterogeneous nuclear ribonucleoprotein A0	1	29.51	6	9475100	6068994	9157712	8517540	386028	538847	575952	621001	9.1	19.9	14.1	16.3	-1.6	0.005	-1	0.7	-1.1	0.5	1.5	0.02	1.4	0.07	-1.1	0.7	0.002
Q$514	Q9EQK5	MVP_MOUSE	Mvp	Major vault protein	1	22.3	11	9414432	5580043	8731204	8004774	683880	161262	416164	612638	16.2	6.5	10.7	17.1	-1.7	0.02	-1.1	0.6	-1.2	0.4	1.6	0.0006	1.4	0.06	-1.1	0.6	0.0004
Q$1904	Q9CZW5	TOM70_MOUSE	Tomm70a	Mitochondrial import receptor subunit TOM70	1	4.26	2	9413454	10379544	9365441	9571567	939903	958298	1091024	690319	22.3	20.6	26	16.1	1.1	1	-1	1	1	1	-1.1	1	-1.1	1	1	1	0.9
Q$988	P25206	MCM3_MOUSE	Mcm3	DNA replication licensing factor MCM3	1	11.45	7	9388907	4948542	9560877	8493968	1102438	376752	826689	1017428	26.3	17	19.3	26.8	-1.9	0.03	1	0.9	-1.1	0.8	1.9	0.006	1.7	0.04	-1.1	0.8	0.006
Q$1622	Q8BMK4	CKAP4_MOUSE	Ckap4	Cytoskeleton-associated protein 4	1	25.39	11	9253301	5332533	8541104	7828066	785282	125453	727185	851297	19	5.3	19	24.3	-1.7	0.04	-1.1	0.8	-1.2	0.6	1.6	0.05	1.5	0.2	-1.1	0.8	0.005
Q$1095	P49312-2	ROA1_MOUSE	Hnrnpa	Isoform Short of Heterogeneous nuclear ribonucleoprotein A1	1	39.93	11	9243590	4456781	9161132	8381606	340108	238387	947633	873959	8.2	12	23.1	23.3	-2.1	2e-05	-1	0.9	-1.1	0.8	2.1	0.03	1.9	0.04	-1.1	0.8	0.0003
Q$989	P25444	RS2_MOUSE	Rps2	40S ribosomal protein S2	1	39.25	8	9239742	6252634	10372780	8704036	503275	795956	1009169	544981	12.2	28.5	21.8	14	-1.5	0.07	1.1	0.6	-1.1	0.6	1.7	0.07	1.4	0.1	-1.2	0.5	0.009
Q$864	P07724	ALBU_MOUSE	Alb	Serum albumin	1	6.91	3	9223210	8697926	13662709	12119550	520155	781194	1010073	1185525	12.6	20.1	16.5	21.9	-1.1	0.6	1.5	0.03	1.3	0.2	1.6	0.03	1.4	0.2	-1.1	0.6	0.004
Q$887	Q3THW5	H2AV_MOUSE	H2afv	Histone H2A.V	1	46.88	6	9202215	6437779	11171498	8960577	421382	335018	984393	472765	10.2	11.6	19.7	11.8	-1.4	0.005	1.2	0.2	-1	0.7	1.7	0.009	1.4	0.01	-1.2	0.2	0.0005
Q$1255	P70315	WASP_MOUSE	Was	Wiskott-Aldrich syndrome protein homolog	1	18.08	4	9144929	4385955	9018658	7906043	752024	274370	845652	1066358	18.4	14	21	30.2	-2.1	0.002	-1	0.9	-1.2	0.8	2.1	0.004	1.8	0.1	-1.1	0.8	0.002
Q$1859	Q9CQU0	TXD12_MOUSE	Txndc12	Thioredoxin domain-containing protein 12	1	40	5	9105770	3526785	7932824	6605748	629281	260737	767848	734358	15.5	16.5	21.6	24.9	-2.6	0.0002	-1.1	0.4	-1.4	0.09	2.2	0.003	1.9	0.02	-1.2	0.4	8e-05
Q$1739	Q91VW3	SH3L3_MOUSE	Sh3bgrl3	SH3 domain-binding glutamic acid-rich-like protein 3	1	67.74	5	9056809	5189654	7589744	7375631	556563	102999	917717	1195933	13.7	4.4	27	36.3	-1.7	0.01	-1.2	0.5	-1.2	0.5	1.5	0.3	1.4	0.5	-1	0.9	0.03
Q$1401	Q5STT6	FA71B_MOUSE	Fam71b	Protein FAM71B	1	7.97	2	9052034	2536988	8842981	6919622	460746	329864	1455545	922309	11.4	29.1	36.8	29.8	-3.6	2e-05	-1	0.9	-1.3	0.2	3.5	0.04	2.7	0.01	-1.3	0.5	0.0003
Q$1759	Q921H8	THIKA_MOUSE	Acaa1a	3-ketoacyl-CoA thiolase A, peroxisomal	1	38.44	12	9048581	6658214	8682037	8034158	304784	158250	527768	524410	7.5	5.3	13.6	14.6	-1.4	0.0007	-1	0.7	-1.1	0.3	1.3	0.08	1.2	0.2	-1.1	0.7	0.004
Q$23	A2ACG7	A2ACG7_MOUSE	Rpn2	Dolichyl-diphosphooligosaccharide--protein glycosyltransferase subunit 2	1	32.68	13	9032878	4174594	8069996	7205325	754748	341299	528686	662281	18.7	18.3	14.6	20.6	-2.2	0.002	-1.1	0.5	-1.3	0.3	1.9	0.002	1.7	0.01	-1.1	0.5	0.0002
Q$2009	Q9JHF5	Q9JHF5_MOUSE	Tcirg1	A3 subunit of vacuolar-adenosine triphosphatase	0.9999	9.59	4	9009201	5791811	8926660	8549366	1007056	401635	627152	1037189	25	15.5	15.7	27.1	-1.6	0.09	-1	1	-1.1	1	1.5	0.02	1.5	0.1	-1	1	0.04
Q$962	P19536	COX5B_MOUSE	Cox5b	Cytochrome c oxidase subunit 5B, mitochondrial	1	48.44	4	8980521	4222002	9669068	9083956	715114	305752	795597	947952	17.8	16.2	18.4	23.3	-2.1	0.001	1.1	0.9	1	0.9	2.3	0.001	2.2	0.02	-1.1	0.9	0.0002
Q$776	O35286	DHX15_MOUSE	Dhx15	Putative pre-mRNA-splicing factor ATP-dependent RNA helicase DHX15	1	14.59	8	8974928	5453708	9097055	8373316	811640	135399	577935	680358	20.2	5.6	14.2	18.2	-1.6	0.06	1	0.9	-1.1	0.8	1.7	0.02	1.5	0.06	-1.1	0.8	0.002
Q$267	D3Z659	D3Z659_MOUSE	Rps2-ps6	Uncharacterized protein	1	42.08	7	8943783	5885831	9996393	8353300	505312	809035	991186	545637	12.6	30.7	22.2	14.6	-1.5	0.07	1.1	0.6	-1.1	0.6	1.7	0.07	1.4	0.1	-1.2	0.5	0.008
Q$1625	Q8BP47	SYNC_MOUSE	Nars	Asparagine--tRNA ligase, cytoplasmic	1	9.12	4	8862198	8026990	10499956	10780348	917496	654522	1139149	945874	23.1	18.2	24.3	19.6	-1.1	0.7	1.2	0.7	1.2	0.6	1.3	0.4	1.3	0.2	1	0.9	0.2
Q$1541	Q8R0B4	Q8R0B4_MOUSE	Tardbp	MCG16669, isoform CRA_a	1	49.15	7	8840013	3612576	8107860	6982006	786937	351495	983558	974186	19.9	21.8	27.1	31.2	-2.4	0.002	-1.1	0.7	-1.3	0.4	2.2	0.01	1.9	0.05	-1.2	0.7	0.002
Q$38	A2AFS1	A2AFS1_MOUSE	Sars	Serine--tRNA ligase, cytoplasmic (Fragment)	0.9119	4.28	1	8769950	10243700	8758350	8504575	453490	571771	790573	342758	11.6	12.5	20.2	9	1.2	0.3	-1	1	-1	1	-1.2	0.5	-1.2	0.2	-1	1	0.2
Q$1091	P48678-2	LMNA_MOUSE	Lmn	Isoform C of Prelamin-A/C	1	27.7	13	8732145	4531342	9042418	8367758	757897	250625	847237	577140	19.4	12.4	21	15.4	-1.9	0.004	1	0.9	-1	0.9	2	0.02	1.8	0.002	-1.1	0.9	0.0005
Q$2043	Q9QYJ0	DNJA2_MOUSE	Dnaja2	DnaJ homolog subfamily A member 2	1	26.21	5	8728029	5286750	7058560	7144880	974417	398451	514229	823808	25	16.9	16.3	25.8	-1.7	0.07	-1.2	0.4	-1.2	0.4	1.3	0.1	1.4	0.3	1	0.9	0.03
Q$1930	Q9D1R9	RL34_MOUSE	Rpl34	60S ribosomal protein L34	1	14.53	2	8697089	4329448	9216856	7386454	155912	413637	1252612	689443	4	21.4	30.4	20.9	-2	6e-05	1.1	0.7	-1.2	0.3	2.1	0.03	1.7	0.03	-1.2	0.4	0.001
Q$1974	Q9DC51	GNAI3_MOUSE	Gnai3	Guanine nucleotide-binding protein G(k) subunit alpha	1	14.69	5	8630133	4435600	7674329	6623432	800333	205991	896303	897961	20.7	10.4	26.1	30.3	-1.9	0.03	-1.1	0.7	-1.3	0.4	1.7	0.1	1.5	0.3	-1.2	0.7	0.008
Q$476	Q9CXW4	RL11_MOUSE	Rpl11	60S ribosomal protein L11	1	48.31	8	8618818	5004151	8110983	7668491	850964	204816	864526	1223151	22.1	9.2	23.8	35.7	-1.7	0.07	-1.1	0.9	-1.1	0.9	1.6	0.1	1.5	0.3	-1.1	0.9	0.04
Q$1101	P49722	PSA2_MOUSE	Psma2	Proteasome subunit alpha type-2	1	58.12	8	8618734	5609476	7831997	8043783	769658	272595	539882	479016	20	10.9	15.4	13.3	-1.5	0.03	-1.1	0.8	-1.1	0.8	1.4	0.03	1.4	0.01	1	0.8	0.007
Q$1645	Q8C2Q8	Q8C2Q8_MOUSE	Atp5c1	ATP synthase subunit gamma	1	39.05	10	8607929	3932792	10990056	9027885	1070054	89020	1052821	1226260	27.8	5.1	21.4	30.4	-2.2	0.06	1.3	0.4	1	0.8	2.8	0.01	2.3	0.06	-1.2	0.5	0.0008
Q$1463	Q61781	K1C14_MOUSE	Krt14	Keratin, type I cytoskeletal 14	1	32.02	8	8600097	4186901	7497925	6504359	1197611	313581	434225	791193	31.1	16.7	12.9	27.2	-2.1	0.09	-1.1	0.5	-1.3	0.5	1.8	0.002	1.6	0.1	-1.2	0.5	0.006
Q$930	P15119	MCPT2_MOUSE	Mcpt2	Mast cell protease 2	1	40.98	8	8582564	5882547	10724851	8550926	556938	251403	1712724	892945	14.5	9.6	35.7	23.4	-1.5	0.01	1.2	0.6	-1	1	1.8	0.2	1.5	0.2	-1.3	0.6	0.03
Q$1154	P60766	CDC42_MOUSE	Cdc42	Cell division control protein 42 homolog	1	33.51	4	8536275	3815369	8306709	7501450	609074	378436	824397	888400	16	22.2	22.2	26.5	-2.2	0.001	-1	0.8	-1.1	0.7	2.2	0.006	2	0.02	-1.1	0.8	0.0007
Q$120	B1AU25	B1AU25_MOUSE	Aifm1	Apoptosis-inducing factor 1, mitochondrial	1	27.96	12	8536079	4617361	8314099	7572843	425948	231416	741127	733413	11.2	11.2	19.9	21.7	-1.8	0.0002	-1	0.8	-1.1	0.6	1.8	0.03	1.6	0.05	-1.1	0.7	0.0006
Q$1545	Q6ZQM8	UD17C_MOUSE	Ugt1a7c	UDP-glucuronosyltransferase 1-7C	1	15.07	7	8532042	3315324	7802033	5575164	846492	799171	1524857	323908	22.2	53.9	43.7	13	-2.6	0.01	-1.1	0.7	-1.5	0.06	2.4	0.1	1.7	0.1	-1.4	0.4	0.007
Q$1560	Q7TMA2-2	ZN503_MOUSE	Znf50	Isoform 2 of Zinc finger protein 503	0.9952	15.76	2	8502960	66184900	38205250	29793270	400766	31344099	18759491	17953547	10.5	105.9	109.8	134.7	7.8	0.6	4.5	0.6	3.5	0.8	-1.7	0.8	-2.2	0.8	-1.3	0.8	0.3
Q$1869	Q9CR68	UCRI_MOUSE	Uqcrfs1	Cytochrome b-c1 complex subunit Rieske, mitochondrial	1	36.86	7	8487435	3811142	8747850	8544443	688026	289261	659374	1093278	18.1	17	16.9	28.6	-2.2	0.001	1	1	1	1	2.3	0.0008	2.2	0.04	-1	1	0.0005
Q$1937	Q9D554	SF3A3_MOUSE	Sf3a3	Splicing factor 3A subunit 3	1	19.16	5	8486157	6555337	9766183	8348300	308870	245448	816612	689178	8.1	8.4	18.7	18.5	-1.3	0.007	1.2	0.5	-1	0.9	1.5	0.07	1.3	0.2	-1.2	0.5	0.009
Q$660	P97371	PSME1_MOUSE	Psme1	Proteasome activator complex subunit 1	1	29.72	5	8419490	3749286	7546979	7144931	467724	467847	779388	661233	12.4	27.9	23.1	20.7	-2.2	0.0006	-1.1	0.6	-1.2	0.4	2	0.02	1.9	0.02	-1.1	0.7	0.0003
Q$943	P17183	ENOG_MOUSE	Eno2	Gamma-enolase	1	6.91	1	8417990	2661820	6249630	5436550	780561	243093	1109353	863092	20.7	20.4	39.7	35.5	-3.2	0.006	-1.3	0.3	-1.5	0.1	2.3	0.1	2	0.1	-1.1	0.6	0.001
Q$1426	Q60972	RBBP4_MOUSE	Rbbp4	Histone-binding protein RBBP4	1	32	7	8368131	6610384	8504957	7830375	642369	380899	522859	441549	17.2	12.9	13.7	12.6	-1.3	0.2	1	0.9	-1.1	0.8	1.3	0.1	1.2	0.3	-1.1	0.7	0.07
Q$1389	Q3V086	Q3V086_MOUSE	Ddx4	DEAD box polypeptide 4	1	2.2	1	8298600	3755650	7305735	6735345	635167	213300	644066	620256	17.1	12.7	19.7	20.6	-2.2	0.0008	-1.1	0.5	-1.2	0.3	1.9	0.004	1.8	0.008	-1.1	0.5	0.0002
Q$1357	Q3TWW8	Q3TWW8_MOUSE	Srsf6	Protein Srsf6	1	7.37	3	8257532	5419155	8738655	7714163	404330	697585	814024	517669	10.9	28.8	20.8	15	-1.5	0.05	1.1	0.7	-1.1	0.7	1.6	0.07	1.4	0.1	-1.1	0.7	0.009
Q$1752	Q91YR9	PTGR1_MOUSE	Ptgr1	Prostaglandin reductase 1	1	22.8	4	8242586	4461377	6832268	7015481	616073	233678	1139996	867132	16.7	11.7	37.3	27.6	-1.8	0.003	-1.2	0.6	-1.2	0.6	1.5	0.4	1.6	0.2	1	0.9	0.03
Q$1887	Q9CY02	AHSP_MOUSE	Ahsp	Alpha-hemoglobin-stabilizing protein	1	33.33	3	8238154	8839045	12221198	12767086	1743016	2208666	3034765	2849582	47.3	55.9	55.5	49.9	1.1	1	1.5	0.8	1.5	0.8	1.4	0.8	1.4	0.8	1	1	0.5
Q$1113	P51859	HDGF_MOUSE	Hdgf	Hepatoma-derived growth factor	1	21.94	4	8231280	3000466	7524662	6506481	324343	262060	804923	693087	8.8	19.5	23.9	23.8	-2.7	9e-06	-1.1	0.6	-1.3	0.2	2.5	0.003	2.2	0.006	-1.2	0.6	4e-05
Q$188	P62751	RL23A_MOUSE	Rpl23a	60S ribosomal protein L23a	1	24.36	5	8228080	5667599	9653773	5564969	4278325	2298407	4112566	1126887	116.3	90.7	95.3	45.3	-1.5	1	1.2	1	-1.5	1	1.7	0.9	-1	1	-1.7	0.9	0.8
Q$944	P17225	PTBP1_MOUSE	Ptbp1	Polypyrimidine tract-binding protein 1	1	40.42	13	8198471	5181416	8973879	8720804	475294	357749	1346279	1198709	13	15.4	33.5	30.7	-1.6	0.006	1.1	0.9	1.1	0.9	1.7	0.2	1.7	0.2	-1	0.9	0.04
Q$1281	P85094	ISC2A_MOUSE	Isoc2a	Isochorismatase domain-containing protein 2A, mitochondrial	1	30.1	4	8193836	3399360	4368482	4291064	2331823	977276	263194	387064	63.6	64.3	13.5	20.2	-2.4	0.4	-1.9	0.6	-1.9	0.6	1.3	0.8	1.3	0.8	-1	0.9	0.08
Q$155	D3YTQ3	D3YTQ3_MOUSE	Hnrnpdl	Heterogeneous nuclear ribonucleoprotein D-like	1	3.81	2	8178669	5831031	8204704	7757308	284140	1037502	826360	1018352	7.8	39.8	22.5	29.4	-1.4	0.4	1	1	-1.1	1	1.4	0.4	1.3	0.6	-1.1	1	0.2
Q$2093	Q9Z126	PLF4_MOUSE	Pf4	Platelet factor 4	1	38.1	4	8159780	6678157	18238418	20348891	1078543	812503	2027075	3986158	29.6	27.2	24.9	43.8	-1.2	0.5	2.2	0.01	2.5	0.1	2.7	0.004	3	0.1	1.1	0.6	0.001
Q$1334	Q20BD0	Q20BD0_MOUSE	Hnrnpab	Heterogeneous nuclear ribonucleoprotein A/B	1	26.2	8	8150967	4305831	8255643	7623616	537008	381942	968756	787559	14.7	19.8	26.2	23.1	-1.9	0.002	1	0.9	-1.1	0.9	1.9	0.03	1.8	0.03	-1.1	0.9	0.003
Q$1252	P70195	PSB7_MOUSE	Psmb7	Proteasome subunit beta type-7	1	20.58	3	8115322	3044226	7219864	6630092	1078754	315171	865958	1269934	29.7	23.2	26.8	42.8	-2.7	0.04	-1.1	0.8	-1.2	0.8	2.4	0.01	2.2	0.2	-1.1	0.8	0.009
Q$1276	P84078	ARF1_MOUSE	Arf1	ADP-ribosylation factor 1	1	57.46	6	8092814	3935808	6799732	6095065	281775	545637	900333	679418	7.8	31	29.6	24.9	-2.1	0.0009	-1.2	0.4	-1.3	0.1	1.7	0.1	1.5	0.1	-1.1	0.5	0.003
Q$827	O88844	IDHC_MOUSE	Idh1	Isocitrate dehydrogenase [NADP] cytoplasmic	1	30.68	8	8052574	4571439	7045567	6109708	793599	148514	773309	601207	22	7.3	24.5	22	-1.8	0.06	-1.1	0.6	-1.3	0.2	1.5	0.1	1.3	0.2	-1.2	0.6	0.009
Q$2003	Q9ERU9	RBP2_MOUSE	Ranbp2	E3 SUMO-protein ligase RanBP2	0.9989	0.75	2	8028829	3261523	8419451	5877578	1142186	205724	648808	820839	31.8	14.1	17.2	31.2	-2.5	0.06	1	0.8	-1.4	0.3	2.6	0.005	1.8	0.1	-1.4	0.1	0.0009
Q$1842	Q9CQ54	NDUC2_MOUSE	Ndufc2	NADH dehydrogenase [ubiquinone] 1 subunit C2	0.9741	15.83	1	8022350	5433650	10772880	9651580	440074	339161	938895	961815	12.3	14	19.5	22.3	-1.5	0.008	1.3	0.08	1.2	0.3	2	0.004	1.8	0.01	-1.1	0.4	0.0005
Q$916	P13634	CAH1_MOUSE	Ca1	Carbonic anhydrase 1	1	47.51	7	7996981	5885575	11069991	7561205	536598	216732	1130084	543494	15	8.2	22.8	16.1	-1.4	0.04	1.4	0.08	-1.1	0.6	1.9	0.04	1.3	0.08	-1.5	0.08	0.0007
Q$1161	P61089	UBE2N_MOUSE	Ube2n	Ubiquitin-conjugating enzyme E2 N	1	36.84	4	7939224	3634722	6759309	6246369	573032	373079	746115	800351	16.1	23	24.7	28.7	-2.2	0.001	-1.2	0.4	-1.3	0.3	1.9	0.03	1.7	0.07	-1.1	0.7	0.002
Q$747	L7N240	L7N240_MOUSE	Gm6139	Protein Gm6139	1	27.6	5	7933323	5146810	8924906	7496679	500306	803441	967564	507561	14.1	34.9	24.2	15.1	-1.5	0.1	1.1	0.6	-1.1	0.6	1.7	0.1	1.5	0.1	-1.2	0.5	0.01
Q$1926	Q9D1K2	VATF_MOUSE	Atp6v1f	V-type proton ATPase subunit F	1	20.17	2	7914370	5428710	9056460	8317330	394350	744367	1220586	1020738	11.1	30.7	30.1	27.4	-1.5	0.1	1.1	0.8	1.1	0.9	1.7	0.2	1.5	0.2	-1.1	0.9	0.06
Q$1105	P50516	VATA_MOUSE	Atp6v1a	V-type proton ATPase catalytic subunit A	1	26.09	15	7890061	5596478	8037885	7745357	536154	273192	634406	632718	15.2	10.9	17.6	18.3	-1.4	0.03	1	1	-1	1	1.4	0.04	1.4	0.06	-1	1	0.02
Q$458	E9PW66	E9PW66_MOUSE	Nap1l1	Nucleosome assembly protein 1-like 1	1	40.43	9	7885035	4520104	7660961	6988244	489929	200572	484878	544963	13.9	9.9	14.2	17.4	-1.7	0.001	-1	0.8	-1.1	0.6	1.7	0.002	1.5	0.01	-1.1	0.6	0.0003
Q$1443	Q61176	ARGI1_MOUSE	Arg1	Arginase-1	1	20.74	5	7873340	4644403	7419799	5921217	482274	573590	603844	304670	13.7	27.6	18.2	11.5	-1.7	0.02	-1.1	0.6	-1.3	0.04	1.6	0.04	1.3	0.2	-1.3	0.2	0.001
Q$1952	P56567	CYTA_MOUSE	Csta	Cystatin-A	1	31.96	3	7869990	1863678	5233915	4236703	401268	387137	674217	739608	11.4	46.4	28.8	39	-4.2	3e-05	-1.5	0.03	-1.9	0.01	2.8	0.01	2.3	0.04	-1.2	0.3	2e-05
Q$236	D3Z1D6	D3Z1D6_MOUSE	Gm10335	Protein Gm10335	1	12.82	4	7858796	5337159	9321628	5256019	4254699	2300356	4127511	1106985	121.1	96.4	99	47.1	-1.5	1	1.2	1	-1.5	1	1.7	0.9	-1	1	-1.8	0.9	0.8
Q$1908	Q9D0I9	SYRC_MOUSE	Rars	Arginine--tRNA ligase, cytoplasmic	0.9998	7.73	4	7855270	3634301	6880870	6442133	634463	168870	321376	743871	18.1	10.4	10.4	25.8	-2.2	0.009	-1.1	0.5	-1.2	0.5	1.9	0.0001	1.8	0.07	-1.1	0.6	0.0002
Q$1282	P97310	MCM2_MOUSE	Mcm2	DNA replication licensing factor MCM2	1	16.04	10	7838233	4388875	8326846	6698622	746566	182254	1013999	778435	21.3	9.3	27.2	26	-1.8	0.05	1.1	0.7	-1.2	0.6	1.9	0.08	1.5	0.1	-1.2	0.6	0.008
Q$2080	Q9WV32	ARC1B_MOUSE	Arpc1b	Actin-related protein 2/3 complex subunit 1B	1	17.47	6	7818461	3474216	6757575	5751017	727405	164888	644385	818379	20.8	10.6	21.3	31.8	-2.3	0.02	-1.2	0.5	-1.4	0.3	1.9	0.03	1.7	0.2	-1.2	0.5	0.001
Q$1651	Q8C872	Q8C872_MOUSE	Tfrc	Transferrin receptor protein 1	1	23.11	9	7803365	4510517	7965026	7256185	259738	429088	547379	516402	7.4	21.3	15.4	15.9	-1.7	0.001	1	0.8	-1.1	0.8	1.8	0.005	1.6	0.01	-1.1	0.8	0.0002
Q$2028	Q9QUH0	GLRX1_MOUSE	Glrx	Glutaredoxin-1	1	70.09	5	7774083	5882304	8387110	7419094	446557	333646	924323	644672	12.8	12.7	24.6	19.4	-1.3	0.06	1.1	0.8	-1	0.8	1.4	0.2	1.3	0.2	-1.1	0.8	0.07
Q$743	J3QQ26	J3QQ26_MOUSE	Pcna-ps2	Proliferating cell nuclear antigen	1	55.17	13	7754698	4420179	7334712	6595879	573799	332223	617508	666424	16.5	16.8	18.8	22.6	-1.8	0.006	-1.1	0.7	-1.2	0.5	1.7	0.02	1.5	0.07	-1.1	0.7	0.003
Q$1014	P29351-2	PTN6_MOUSE	Ptpn	Isoform 2 of Tyrosine-protein phosphatase non-receptor type 6	1	27.64	11	7751200	4008525	7344993	6597070	755113	319477	662893	662385	21.8	17.8	20.2	22.5	-1.9	0.01	-1.1	0.7	-1.2	0.6	1.8	0.01	1.6	0.03	-1.1	0.7	0.003
Q$46	A2AKU9	A2AKU9_MOUSE	Atp5c1	ATP synthase subunit gamma	1	36.03	9	7732309	3659724	10256178	8366191	925170	73341	942357	1065570	26.8	4.5	20.5	28.5	-2.1	0.06	1.3	0.3	1.1	0.7	2.8	0.01	2.3	0.06	-1.2	0.4	0.0004
Q$459	E9PW69	E9PW69_MOUSE	Psma4	Proteasome subunit alpha type (Fragment)	1	38.57	4	7703980	4689618	8671975	7592794	455587	459688	1104992	439162	13.2	21.9	28.5	12.9	-1.6	0.01	1.1	0.8	-1	0.9	1.8	0.04	1.6	0.01	-1.1	0.8	0.005
Q$107	B1AQ75	KRT36_MOUSE	Krt36	Keratin, type I cuticular Ha6	1	10.57	4	7687593	6771901	8614179	7265664	520314	1091790	1003978	615913	15.1	36.1	26.1	19	-1.1	0.9	1.1	0.9	-1.1	0.9	1.3	0.8	1.1	0.9	-1.2	0.8	0.5
Q$1164	P61205	ARF3_MOUSE	Arf3	ADP-ribosylation factor 3	1	41.44	5	7680546	3540673	5886212	5486900	271715	542450	793408	654554	7.9	34.3	30.1	26.7	-2.2	0.0008	-1.3	0.2	-1.4	0.07	1.7	0.2	1.5	0.2	-1.1	0.7	0.002
Q$43	O08810	U5S1_MOUSE	Eftud2	116 kDa U5 small nuclear ribonucleoprotein component	1	16.89	12	7667485	4792546	8554664	7398119	367494	499855	560320	389379	10.7	23.3	14.6	11.8	-1.6	0.008	1.1	0.4	-1	0.6	1.8	0.006	1.5	0.01	-1.2	0.3	0.0002
Q$1652	Q8CAG6	Q8CAG6_MOUSE	Plek	Pleckstrin	1	37.61	6	7660012	3277142	7416436	5453739	673548	282468	418752	472426	19.7	19.3	12.6	19.4	-2.3	0.002	-1	0.8	-1.4	0.05	2.3	0.0002	1.7	0.02	-1.4	0.04	2e-05
Q$688	G3XA48	G3XA48_MOUSE	Idi1	Isopentenyl-diphosphate Delta-isomerase 1	1	37.1	9	7658012	3843724	9509702	8439439	459222	261968	780189	927062	13.4	15.2	18.3	24.6	-2	0.0005	1.2	0.2	1.1	0.6	2.5	0.0006	2.2	0.02	-1.1	0.6	0.0001
Q$1982	Q9DCH4	EIF3F_MOUSE	Eif3f	Eukaryotic translation initiation factor 3 subunit F	1	22.16	4	7650010	5779472	9960123	8525205	355574	494979	899033	560631	10.4	19.2	20.2	14.7	-1.3	0.06	1.3	0.1	1.1	0.4	1.7	0.02	1.5	0.03	-1.2	0.4	0.002
Q$757	O08749	DLDH_MOUSE	Dld	Dihydrolipoyl dehydrogenase, mitochondrial	1	22.4	7	7633064	4550445	7641980	7283002	404931	385970	485862	910287	11.9	19	14.2	27.9	-1.7	0.003	1	1	-1	1	1.7	0.005	1.6	0.09	-1	1	0.004
Q$615	Q8VHM5	Q8VHM5_MOUSE	Hnrnpr	Heterogeneous nuclear ribonucleoprotein R	1	9.02	5	7616460	3928245	6579649	3679272	3544418	2007938	3150535	727667	104.1	114.3	107.1	44.2	-1.9	0.9	-1.2	1	-2.1	0.9	1.7	0.9	-1.1	1	-1.8	0.9	0.6
Q$1577	Q80XR6	Q80XR6_MOUSE	Hnrnpab	Heterogeneous nuclear ribonucleoprotein A/B	1	22.19	7	7615869	4047277	7799357	7176694	431767	391938	889556	730564	12.7	21.7	25.5	22.8	-1.9	0.002	1	0.9	-1.1	0.9	1.9	0.02	1.8	0.02	-1.1	0.9	0.002
Q$1339	Q9R233-2	TPSN_MOUSE	Tapb	Isoform Short of Tapasin	1	20	6	7596849	7055463	8237503	8542956	291405	281338	594935	987305	8.6	8.9	16.1	25.8	-1.1	0.7	1.1	0.7	1.1	0.7	1.2	0.5	1.2	0.7	1	0.8	0.3
Q$603	F6YTZ4	F6YTZ4_MOUSE	Gm6576	Uncharacterized protein	1	28.1	6	7552349	4881541	8086337	6858476	392986	615132	881039	456409	11.6	28.2	24.4	14.9	-1.5	0.04	1.1	0.6	-1.1	0.6	1.7	0.08	1.4	0.1	-1.2	0.6	0.01
Q$1111	P51437	CRAMP_MOUSE	Camp	Cathelin-related antimicrobial peptide	1	35.84	4	7523048	4755910	7412595	6371568	1101396	572405	1367630	966482	32.7	26.9	41.3	33.9	-1.6	0.3	-1	1	-1.2	0.8	1.6	0.4	1.3	0.6	-1.2	0.8	0.2
Q$1139	Q8CFQ9	Q8CFQ9_MOUSE	Fus	Fusion, derived from t(1216) malignant liposarcoma (Human)	1	23.21	11	7499946	4073294	6987702	6368914	328890	212835	655308	664547	9.8	11.7	21	23.3	-1.8	0.0001	-1.1	0.8	-1.2	0.4	1.7	0.01	1.6	0.09	-1.1	0.8	0.001
Q$591	F6WR04	F6WR04_MOUSE	Ctss	Cathepsin S	1	50.15	12	7499538	5072549	7242746	6477999	599405	168630	583850	572712	17.9	7.4	18	19.8	-1.5	0.08	-1	0.8	-1.2	0.6	1.4	0.09	1.3	0.2	-1.1	0.6	0.02
Q$677	G3X8T3	G3X8T3_MOUSE	Ctsa	Lysosomal protective protein	1	21.75	6	7498354	4693471	10433349	7212963	445215	131364	1115657	297155	13.3	6.3	23.9	9.2	-1.6	0.01	1.4	0.1	-1	0.6	2.2	0.03	1.5	0.0003	-1.4	0.1	9e-05
Q$710	H3BKL5	H3BKL5_MOUSE	Acaa1a	3-ketoacyl-CoA thiolase A, peroxisomal	1	35.66	9	7463707	5102611	7027135	6428944	276453	167858	424076	447016	8.3	7.4	13.5	15.5	-1.5	0.0005	-1.1	0.6	-1.2	0.2	1.4	0.01	1.3	0.09	-1.1	0.6	0.001
Q$2039	Q9QY81	PO210_MOUSE	Nup210	Nuclear pore membrane glycoprotein 210	1	9.17	10	7456564	4079424	6829768	5630895	464513	84552	594118	435253	13.9	4.6	19.5	17.3	-1.8	0.009	-1.1	0.4	-1.3	0.08	1.7	0.05	1.4	0.08	-1.2	0.3	0.0003
Q$76	A2AVJ7	A2AVJ7_MOUSE	Rrbp1	Ribosome-binding protein 1	1	7.31	8	7368061	3637519	6972238	6219525	498190	173130	526829	678105	15.1	10.6	16.9	24.4	-2	0.0006	-1.1	0.6	-1.2	0.5	1.9	0.002	1.7	0.07	-1.1	0.6	0.0004
Q$1800	Q99KV1	DJB11_MOUSE	Dnajb11	DnaJ homolog subfamily B member 11	1	16.2	4	7321362	3744848	6699048	5089980	609907	220143	560680	321399	18.6	13.1	18.7	14.1	-2	0.003	-1.1	0.5	-1.4	0.04	1.8	0.006	1.4	0.03	-1.3	0.07	0.0002
Q$718	H3BLK8	H3BLK8_MOUSE	Zfhx4	Zinc finger homeobox protein 4	0.971	1.41	1	7321140	8324040	7728450	8199760	413338	489599	585855	701203	12.6	13.2	17	19.1	1.1	0.6	1.1	0.9	1.1	0.8	-1.1	0.9	-1	0.9	1.1	0.9	0.6
Q$2082	Q9WV80	SNX1_MOUSE	Snx1	Sorting nexin-1	1	16.67	4	7319868	3354015	3971732	4327857	326858	445076	746759	813528	10	29.7	42	42	-2.2	0.0006	-1.8	0.02	-1.7	0.04	1.2	0.7	1.3	0.7	1.1	0.8	0.002
Q$2051	Q9QZQ8-2	H2AY_MOUSE	H2af	Isoform 1 of Core histone macro-H2A.1	1	22.76	5	7317569	3499992	6969864	6497508	381529	406320	857190	690017	11.7	26	27.5	23.7	-2.1	0.0008	-1	0.9	-1.1	0.7	2	0.03	1.9	0.03	-1.1	0.9	0.002
Q$1397	Q5ISE2	Z36L3_MOUSE	Zfp36l3	Zinc finger protein 36, C3H1 type-like 3	0.9862	11.17	2	7306594	9432550	8462250	7017169	586253	2539742	2310564	2245861	17.9	60.2	61.1	71.6	1.3	1	1.2	1	-1	1	-1.1	1	-1.3	1	-1.2	1	0.8
Q$1293	P97429	ANXA4_MOUSE	Anxa4	Annexin A4	1	43.57	10	7275775	2739696	6211274	5045160	474307	204368	397391	508123	14.6	16.7	14.3	22.5	-2.7	0.0001	-1.2	0.2	-1.4	0.04	2.3	0.0003	1.8	0.01	-1.2	0.2	6e-06
Q$2037	Q9QXT0	CNPY2_MOUSE	Cnpy2	Protein canopy homolog 2	0.9666	24.73	3	7269064	6956653	8242707	8278836	318241	684535	1221065	735491	9.8	22	33.1	19.9	-1	0.9	1.1	0.9	1.1	0.8	1.2	0.9	1.2	0.8	1	1	0.6
Q$2044	Q9QZ23	NFU1_MOUSE	Nfu1	NFU1 iron-sulfur cluster scaffold homolog, mitochondrial	0.9999	5.88	1	7258320	3925780	8021120	7279720	463965	1063754	1022751	855508	14.3	60.6	28.5	26.3	-1.8	0.1	1.1	0.9	1	1	2	0.1	1.9	0.1	-1.1	0.9	0.02
Q$632	F8WIN2	F8WIN2_MOUSE	Arid3b	AT-rich interactive domain-containing protein 3B	0.9321	9.89	1	7214200	5708995	6408430	5003145	1007185	649359	944003	236628	31.2	25.4	32.9	10.6	-1.3	0.7	-1.1	0.8	-1.4	0.4	1.1	0.8	-1.1	0.7	-1.3	0.7	0.3
Q$1697	Q8R1B4	EIF3C_MOUSE	Eif3c	Eukaryotic translation initiation factor 3 subunit C	1	5.82	4	7200250	3818950	7088711	6668680	582485	304427	645052	839566	18.1	17.8	20.3	28.2	-1.9	0.005	-1	0.9	-1.1	0.9	1.9	0.009	1.7	0.05	-1.1	0.9	0.004
Q$1888	Q9CY50	SSRA_MOUSE	Ssr1	Translocon-associated protein subunit alpha	1	21.68	5	7173585	4355097	8952107	7302431	569513	182712	867233	289842	17.8	9.4	21.7	8.9	-1.6	0.03	1.2	0.3	1	0.8	2.1	0.03	1.7	0.0002	-1.2	0.3	0.0002
Q$1733	Q91VC3	IF4A3_MOUSE	Eif4a3	Eukaryotic initiation factor 4A-III	1	6.33	3	7156834	3305252	7492940	6381332	202250	463224	709030	888451	6.3	31.3	21.2	31.1	-2.2	0.0004	1	0.7	-1.1	0.7	2.3	0.006	1.9	0.06	-1.2	0.7	0.0008
Q$1205	P62843	RS15_MOUSE	Rps15	40S ribosomal protein S15	1	46.9	4	7153987	4746247	5538025	6811367	1464595	457640	466923	1304126	45.8	21.6	18.9	42.8	-1.5	0.7	-1.3	0.7	-1.1	0.9	1.2	0.7	1.4	0.7	1.2	0.7	0.4
Q$1172	P62075	TIM13_MOUSE	Timm13	Mitochondrial import inner membrane translocase subunit Tim13	1	33.68	3	7125708	3472547	6541901	5800286	426112	235939	552336	729434	13.4	15.2	18.9	28.1	-2.1	0.0004	-1.1	0.7	-1.2	0.4	1.9	0.005	1.7	0.06	-1.1	0.7	0.0007
Q$877	P08730-2	K1C13_MOUSE	Krt1	Isoform 2 of Keratin, type I cytoskeletal 13	1	2.89	2	7117308	4944082	8626753	4474807	4414239	2351517	4273254	1140567	138.7	106.4	110.8	57	-1.4	1	1.2	1	-1.6	1	1.7	1	-1.1	1	-1.9	1	0.8
Q$1054	P37040	NCPR_MOUSE	Por	NADPH--cytochrome P450 reductase	1	22.71	10	7112533	3304232	6429576	5689830	544124	162814	567410	467308	17.1	11	19.7	18.4	-2.2	0.008	-1.1	0.6	-1.3	0.2	1.9	0.02	1.7	0.008	-1.1	0.6	0.0002
Q$705	H3BJZ9	H3BJZ9_MOUSE	Acaa1a	3-ketoacyl-CoA thiolase A, peroxisomal	1	38.07	9	7106023	5219338	7030528	6353554	246888	189888	437858	402636	7.8	8.1	13.9	14.2	-1.4	0.002	-1	0.9	-1.1	0.4	1.3	0.03	1.2	0.1	-1.1	0.5	0.004
Q$2107	Q9Z2P8	VAMP5_MOUSE	Vamp5	Vesicle-associated membrane protein 5	0.9984	12.75	1	7095160	3411960	8671750	7990820	934939	784361	1528544	724428	29.5	51.4	39.4	20.3	-2.1	0.08	1.2	0.8	1.1	0.8	2.5	0.08	2.3	0.02	-1.1	0.8	0.01
Q$1214	P62911	RL32_MOUSE	Rpl32	60S ribosomal protein L32	1	28.15	4	7070227	3979603	6636362	6040374	801346	370687	633008	735854	25.3	20.8	21.3	27.2	-1.8	0.04	-1.1	0.8	-1.2	0.8	1.7	0.04	1.5	0.1	-1.1	0.8	0.02
Q$741	J3QNR5	J3QNR5_MOUSE	Tubb4b-ps1	Uncharacterized protein	1	20.95	5	7068140	4010793	8156800	7239376	191285	439568	941247	473882	6.1	24.5	25.8	14.6	-1.8	0.001	1.2	0.7	1	0.7	2	0.02	1.8	0.005	-1.1	0.7	0.0007
Q$938	P16460	ASSY_MOUSE	Ass1	Argininosuccinate synthase	1	20.87	7	7067858	3778587	7399859	6469039	815113	109445	870908	905028	25.8	6.5	26.3	31.3	-1.9	0.08	1	0.9	-1.1	0.9	2	0.08	1.7	0.2	-1.1	0.9	0.01
Q$1183	P62267	RS23_MOUSE	Rps23	40S ribosomal protein S23	1	35.66	7	7049898	4315957	7544316	6356174	649095	205295	733136	441554	20.6	10.6	21.7	15.5	-1.6	0.05	1.1	0.6	-1.1	0.6	1.7	0.05	1.5	0.02	-1.2	0.5	0.004
Q$168	D3Z722	D3Z722_MOUSE	Rps19	40S ribosomal protein S19	1	19.34	6	7001371	4512509	6340812	5646766	310249	1160949	570809	592727	9.9	57.5	20.1	23.5	-1.6	0.4	-1.1	0.7	-1.2	0.4	1.4	0.6	1.3	0.7	-1.1	0.7	0.1
Q$1985	Q9DCM0	ETHE1_MOUSE	Ethe1	Persulfide dioxygenase ETHE1, mitochondrial	1	39.76	6	6968563	4313245	6922440	7629922	305209	205947	693939	1488923	9.8	10.7	22.4	43.6	-1.6	0.0005	-1	1	1.1	1	1.6	0.08	1.8	0.3	1.1	1	0.06
Q$606	Q7M739	Q7M739_MOUSE	Tpr	Nuclear pore complex-associated intranuclear coiled-coil protein TPR	1	4.03	8	6955032	3486879	5447788	5411685	325789	407780	542708	604255	10.5	26.2	22.3	25	-2	0.001	-1.3	0.1	-1.3	0.1	1.6	0.1	1.6	0.1	-1	1	0.001
Q$789	O35737	HNRH1_MOUSE	Hnrnph1	Heterogeneous nuclear ribonucleoprotein H	1	28.51	10	6944720	4552265	6537640	5933923	481915	154647	496398	689066	15.5	7.6	17	26	-1.5	0.03	-1.1	0.7	-1.2	0.6	1.4	0.07	1.3	0.4	-1.1	0.7	0.02
Q$2038	Q9QXX4	CMC2_MOUSE	Slc25a13	Calcium-binding mitochondrial carrier protein Aralar2	1	11.54	5	6931096	4755698	6589826	6588847	929297	199470	593976	660065	30	9.4	20.2	22.4	-1.5	0.3	-1.1	1	-1.1	1	1.4	0.1	1.4	0.2	-1	1	0.1
Q$1724	Q8VEB4	PAG15_MOUSE	Pla2g15	Group XV phospholipase A2	0.981	9.71	3	6914466	3468766	8062684	6238932	535268	127578	1250131	698939	17.3	8.2	34.7	25.1	-2	0.01	1.2	0.7	-1.1	0.7	2.3	0.08	1.8	0.08	-1.3	0.6	0.004
Q$1575	Q80X72	LRC15_MOUSE	Lrrc15	Leucine-rich repeat-containing protein 15	0.9967	2.76	2	6905629	4638452	8397922	7334510	703045	467720	1216678	574825	22.8	22.5	32.4	17.5	-1.5	0.1	1.2	0.7	1.1	0.7	1.8	0.1	1.6	0.04	-1.1	0.7	0.03
Q$1390	Q3V117	Q3V117_MOUSE	Acly	ATP-citrate synthase	1	15.08	11	6881480	5256995	7057693	6864820	443722	128654	776095	647222	14.4	5.5	24.6	21.1	-1.3	0.1	1	1	-1	1	1.3	0.3	1.3	0.3	-1	1	0.1
Q$1045	P35550	FBRL_MOUSE	Fbl	rRNA 2'-O-methyltransferase fibrillarin	1	29.36	6	6880517	3484478	7319824	7079984	329612	175235	476300	831594	10.7	11.2	14.6	26.3	-2	0.0001	1.1	0.9	1	1	2.1	0.0003	2	0.04	-1	1	0.0002
Q$249	D3Z3K1	D3Z3K1_MOUSE	Gm10288	MCG11809	1	25.84	5	6878980	3932891	6510293	6274333	840292	244735	840401	1099872	27.3	13.9	28.9	39.2	-1.7	0.1	-1.1	1	-1.1	1	1.7	0.2	1.6	0.3	-1	1	0.08
Q$1474	Q62093	SRSF2_MOUSE	Srsf2	Serine/arginine-rich splicing factor 2	1	11.31	2	6864301	3741119	6897155	6155107	298141	272161	692879	426357	9.7	16.3	22.5	15.5	-1.8	0.0003	1	1	-1.1	0.5	1.8	0.01	1.6	0.007	-1.1	0.6	0.0004
Q$2053	Q9R0N0	GALK1_MOUSE	Galk1	Galactokinase	0.9999	22.45	4	6863641	4760003	7346505	7729991	487874	315370	493191	913441	15.9	14.8	15	26.4	-1.4	0.03	1.1	0.8	1.1	0.8	1.5	0.01	1.6	0.06	1.1	0.8	0.01
Q$1659	Q8CG48	SMC2_MOUSE	Smc2	Structural maintenance of chromosomes protein 2	1	4.87	5	6844491	5160669	8762378	8133062	933256	777434	1029207	1227934	30.5	33.7	26.3	33.8	-1.3	0.6	1.3	0.6	1.2	0.7	1.7	0.1	1.6	0.3	-1.1	0.7	0.1
Q$101	B0F2B4	NLGN4_MOUSE	Nlgn4l	Neuroligin 4-like	0.9809	6.88	2	6840605	22301651	16487314	14326380	1122987	8272481	7886076	7043587	36.7	82.9	107	109.9	3.3	0.6	2.4	0.8	2.1	0.8	-1.4	0.9	-1.6	0.9	-1.2	0.9	0.5
Q$2021	Q9JJZ2	TBA8_MOUSE	Tuba8	Tubulin alpha-8 chain	1	8.69	4	6796709	2736191	5626612	4610042	705163	212431	691492	393479	23.2	17.4	27.5	19.1	-2.5	0.02	-1.2	0.4	-1.5	0.08	2.1	0.05	1.7	0.02	-1.2	0.4	0.0006
Q$593	P31786	ACBP_MOUSE	Dbi	Acyl-CoA-binding protein	1	52.87	5	6791224	2564478	5735357	4873745	536967	263551	679388	705574	17.7	23	26.5	32.4	-2.6	0.0006	-1.2	0.4	-1.4	0.2	2.2	0.01	1.9	0.06	-1.2	0.4	0.0007
Q$1104	P50446	K2C6A_MOUSE	Krt6a	Keratin, type II cytoskeletal 6A	1	8.32	7	6786683	6475360	6818590	6797095	411741	456838	446698	528551	13.6	15.8	14.6	17.4	-1	1	1	1	1	1	1.1	1	1	1	-1	1	0.9
Q$1304	P99026	PSB4_MOUSE	Psmb4	Proteasome subunit beta type-4	1	25	3	6779706	2443800	2986567	2448756	3505621	770625	477611	332527	115.6	70.5	35.8	30.4	-2.8	0.9	-2.3	0.9	-2.8	0.9	1.2	0.9	1	1	-1.2	0.9	0.3
Q$865	P07742	RIR1_MOUSE	Rrm1	Ribonucleoside-diphosphate reductase large subunit	0.9987	4.8	2	6758893	3642528	6765018	5971701	237823	320101	775291	733631	7.9	19.7	25.6	27.5	-1.9	0.0003	1	1	-1.1	0.7	1.9	0.03	1.6	0.08	-1.1	0.7	0.004
Q$781	O35459	ECH1_MOUSE	Ech1	Delta(3,5)-Delta(2,4)-dienoyl-CoA isomerase, mitochondrial	1	25.99	6	6749271	2944089	5849989	5089591	467852	225443	682772	686381	15.5	17.1	26.1	30.2	-2.3	0.0005	-1.2	0.5	-1.3	0.2	2	0.02	1.7	0.07	-1.1	0.5	0.001
Q$609	F6ZK01	F6ZK01_MOUSE	Prtn3	Myeloblastin (Fragment)	1	29.37	2	6632576	6038099	6773408	6915308	448802	515967	588666	579192	15.1	19.1	19.4	18.7	-1.1	0.9	1	1	1	1	1.1	0.9	1.1	0.9	1	1	0.7
Q$1250	P68510	1433F_MOUSE	Ywhah	14-3-3 protein eta	1	41.46	6	6624871	4756407	6485693	6415063	573291	137654	346138	349729	19.4	6.5	11.9	12.2	-1.4	0.1	-1	1	-1	1	1.4	0.01	1.3	0.01	-1	1	0.01
Q$929	P15089	CBPA3_MOUSE	Cpa3	Mast cell carboxypeptidase A	1	17.51	5	6605018	3435933	6632768	5435259	547859	165199	545250	413571	18.5	10.8	18.4	17	-1.9	0.01	1	1	-1.2	0.3	1.9	0.01	1.6	0.01	-1.2	0.3	0.0003
Q$1848	Q9CQE8	CN166_MOUSE	2700060E02Rik	UPF0568 protein C14orf166 homolog	1	18.85	3	6590208	3916497	6646547	5969278	463074	395280	316301	510539	15.7	22.6	10.6	19.1	-1.7	0.01	1	0.9	-1.1	0.6	1.7	0.004	1.5	0.05	-1.1	0.6	0.001
Q$1279	P84104-2	SRSF3_MOUSE	Srsf	Isoform Short of Serine/arginine-rich splicing factor 3	1	30.65	4	6588123	3398431	6944955	6005075	277716	517984	876283	337122	9.4	34.1	28.2	12.6	-1.9	0.004	1.1	0.7	-1.1	0.5	2	0.03	1.8	0.01	-1.2	0.6	0.001
Q$1812	Q99LX8	OST4_MOUSE	Ost4	Dolichyl-diphosphooligosaccharide--protein glycosyltransferase subunit 4	0.9767	100	1	6559030	4340630	7070560	7066150	305843	200846	749379	487746	10.4	10.3	23.7	15.4	-1.5	0.002	1.1	0.8	1.1	0.8	1.6	0.08	1.6	0.004	-1	1	0.003
Q$1576	Q80X90	FLNB_MOUSE	Flnb	Filamin-B	1	5.23	10	6556996	4267304	6996670	6074662	353481	73709	751205	802957	12.1	3.9	24	29.6	-1.5	0.01	1.1	0.8	-1.1	0.8	1.6	0.1	1.4	0.3	-1.2	0.8	0.02
Q$731	J3QM94	J3QM94_MOUSE	Gm5070	Uncharacterized protein	1	16.25	4	6541890	4142520	7014849	6001856	371772	609593	840716	426317	12.7	32.9	26.8	15.9	-1.6	0.06	1.1	0.7	-1.1	0.7	1.7	0.1	1.4	0.1	-1.2	0.7	0.02
Q$2020	Q9JJU8	SH3L1_MOUSE	Sh3bgrl	SH3 domain-binding glutamic acid-rich-like protein	1	58.77	4	6541532	5229764	6008344	5713506	335483	322743	446790	390569	11.5	13.8	16.6	15.3	-1.3	0.1	-1.1	0.7	-1.1	0.5	1.1	0.6	1.1	0.7	-1.1	0.7	0.1
Q$536	E9Q7Q3	E9Q7Q3_MOUSE	Tpm3	Tropomyosin alpha-3 chain	1	33.47	13	6446754	3521707	6987150	6688170	671249	177985	791531	640557	23.3	11.3	25.3	21.4	-1.8	0.05	1.1	0.9	1	1	2	0.05	1.9	0.04	-1	1	0.004
Q$1310	Q01320	TOP2A_MOUSE	Top2a	DNA topoisomerase 2-alpha	1	5.82	7	6416612	3786397	6008073	5701805	272403	210329	404879	550234	9.5	12.4	15.1	21.6	-1.7	0.0004	-1.1	0.7	-1.1	0.6	1.6	0.006	1.5	0.05	-1.1	0.7	0.0009
Q$662	G3UY93	G3UY93_MOUSE	Vars	Valine--tRNA ligase (Fragment)	1	8.37	6	6366967	3441865	10140584	6940729	1521170	834206	1647277	453003	53.4	54.2	36.3	14.6	-1.8	0.4	1.6	0.4	1.1	0.7	2.9	0.04	2	0.04	-1.5	0.4	0.01
Q$722	Q6PDM2	SRSF1_MOUSE	Srsf1	Serine/arginine-rich splicing factor 1	1	29.44	7	6339267	2344753	5714909	4536302	540799	151008	535465	762861	19.1	14.4	21	37.6	-2.7	0.007	-1.1	0.4	-1.4	0.2	2.4	0.01	1.9	0.2	-1.3	0.4	0.0005
Q$1688	Q8K4Z5	SF3A1_MOUSE	Sf3a1	Splicing factor 3A subunit 1	1	8.34	4	6324576	2689939	5284959	4822698	322846	117348	466536	810392	11.4	9.8	19.7	37.6	-2.4	3e-05	-1.2	0.3	-1.3	0.3	2	0.02	1.8	0.2	-1.1	0.6	0.0008
Q$862	P07310	KCRM_MOUSE	Ckm	Creatine kinase M-type	1	14.7	3	6315959	4311670	6123611	5201774	196258	393603	770199	518519	6.9	20.4	28.1	22.3	-1.5	0.01	-1	0.8	-1.2	0.3	1.4	0.3	1.2	0.5	-1.2	0.6	0.05
Q$1790	Q99KF1	TMED9_MOUSE	Tmed9	Transmembrane emp24 domain-containing protein 9	1	14.47	3	6294631	4260555	6169483	5504129	631567	906763	1206652	328769	22.4	47.6	43.7	13.4	-1.5	0.5	-1	0.9	-1.1	0.7	1.4	0.7	1.3	0.7	-1.1	0.9	0.3
Q$2101	Q9Z204-3	HNRPC_MOUSE	Hnrnp	Isoform 3 of Heterogeneous nuclear ribonucleoproteins C1/C2	1	23.21	7	6284237	3292105	6141640	5666920	297374	266228	651713	700393	10.6	18.1	23.7	27.6	-1.9	0.0004	-1	0.9	-1.1	0.8	1.9	0.02	1.7	0.05	-1.1	0.9	0.003
Q$1839	Q9CQ19	MYL9_MOUSE	Myl9	Myosin regulatory light polypeptide 9	1	11.63	1	6267160	2871140	7386700	6995310	666606	461339	1011203	409360	23.8	35.9	30.6	13.1	-2.2	0.02	1.2	0.8	1.1	0.8	2.6	0.02	2.4	0.0009	-1.1	0.8	0.0009
Q$1133	P55302	AMRP_MOUSE	Lrpap1	Alpha-2-macroglobulin receptor-associated protein	1	15.83	5	6252142	2689423	5157082	4850840	886664	151301	683854	536837	31.7	12.6	29.7	24.7	-2.3	0.08	-1.2	0.6	-1.3	0.5	1.9	0.08	1.8	0.08	-1.1	0.7	0.008
Q$646	P62897	CYC_MOUSE	Cycs	Cytochrome c, somatic	1	34.29	3	6244371	5044136	6065370	5819749	454729	673550	466234	285437	16.3	29.9	17.2	11	-1.2	0.7	-1	0.9	-1.1	0.8	1.2	0.8	1.2	0.8	-1	0.9	0.4
Q$1118	P52825	CPT2_MOUSE	Cpt2	Carnitine O-palmitoyltransferase 2, mitochondrial	0.9988	6.84	3	6232237	2113720	6162085	4704408	826491	247398	672812	571048	29.7	26.2	24.4	27.1	-2.9	0.02	-1	0.9	-1.3	0.4	2.9	0.003	2.2	0.02	-1.3	0.4	0.0007
Q$1263	Q60817	NACA_MOUSE	Naca	Nascent polypeptide-associated complex subunit alpha	1	33.95	8	6220507	3380637	6815518	5832348	442119	128593	649748	538497	15.9	8.5	21.3	20.6	-1.8	0.01	1.1	0.7	-1.1	0.7	2	0.03	1.7	0.04	-1.2	0.6	0.0006
Q$707	H3BKA1	H3BKA1_MOUSE	Acaa1a	3-ketoacyl-CoA thiolase A, peroxisomal (Fragment)	1	48.24	7	6213789	4295659	6077881	5401438	234511	208480	360345	363687	8.4	10.9	13.3	15.1	-1.4	0.002	-1	0.8	-1.2	0.3	1.4	0.01	1.3	0.1	-1.1	0.4	0.001
Q$56	P47757-2	CAPZB_MOUSE	Capz	Isoform 2 of F-actin-capping protein subunit beta	1	30.15	6	6204584	4414914	6333282	5947782	796388	461295	701542	802764	28.7	23.4	24.8	30.2	-1.4	0.4	1	1	-1	1	1.4	0.3	1.3	0.4	-1.1	1	0.2
Q$1469	Q61897	KT33B_MOUSE	Krt33b	Keratin, type I cuticular Ha3-II	1	14.11	6	6186306	29581746	6359970	15645563	310642	11950354	300984	9447931	11.2	90.3	10.6	135	4.8	0.5	1	0.8	2.5	0.8	-4.7	0.5	-1.9	0.8	2.5	0.8	0.1
Q$770	O09167	RL21_MOUSE	Rpl21	60S ribosomal protein L21	0.9998	18.75	4	6182714	2328830	6678326	5031333	709144	269888	889348	636072	25.6	25.9	29.8	28.3	-2.7	0.006	1.1	0.7	-1.2	0.5	2.9	0.02	2.2	0.02	-1.3	0.4	0.001
Q$765	O09043	NAPSA_MOUSE	Napsa	Napsin-A	1	24.11	4	6164331	2735141	5687627	4883993	695685	122620	434821	495492	25.2	10	17.1	22.7	-2.3	0.04	-1.1	0.6	-1.3	0.4	2.1	0.01	1.8	0.04	-1.2	0.4	0.0006
Q$1990	Q9DD03	RAB13_MOUSE	Rab13	Ras-related protein Rab-13	1	6.93	1	6163830	4659590	6310860	7610870	380107	206818	228098	1379550	13.8	9.9	8.1	40.5	-1.3	0.04	1	0.7	1.2	0.7	1.4	0.004	1.6	0.3	1.2	0.7	0.08
Q$242	D3Z220	D3Z220_MOUSE	Ctsc	Dipeptidyl peptidase 1 (Fragment)	1	4.72	1	6152595	1966005	5854540	5374320	703484	55830	730485	518487	25.6	6.3	27.9	21.6	-3.1	0.02	-1.1	0.8	-1.1	0.8	3	0.02	2.7	0.02	-1.1	0.8	0.0003
Q$1288	P97369	NCF4_MOUSE	Ncf4	Neutrophil cytosol factor 4	1	29.5	7	6145478	4592905	6282486	5322347	258932	712107	461229	280548	9.4	34.7	16.4	11.8	-1.3	0.3	1	0.8	-1.2	0.3	1.4	0.3	1.2	0.6	-1.2	0.3	0.07
Q$737	J3QNG0	J3QNG0_MOUSE	Gm5424	MCG15755	1	16.26	6	6134176	3040478	6445749	5581102	761077	95936	844868	840610	27.7	7.1	29.3	33.7	-2	0.09	1.1	0.9	-1.1	0.9	2.1	0.09	1.8	0.1	-1.2	0.9	0.01
Q$1028	P31996-2	CD68_MOUSE	Cd6	Isoform Short of Macrosialin	0.9999	11.01	3	6130002	2957046	5679803	4923291	438047	231115	844877	192205	16	17.5	33.3	8.7	-2.1	0.001	-1.1	0.7	-1.2	0.1	1.9	0.1	1.7	0.001	-1.2	0.7	0.002
Q$2109	Q9Z2U0	PSA7_MOUSE	Psma7	Proteasome subunit alpha type-7	1	23.79	4	6124068	3394661	5899118	5179471	338160	178626	575616	552398	12.3	11.8	21.8	23.8	-1.8	0.0006	-1	0.7	-1.2	0.5	1.7	0.05	1.5	0.06	-1.1	0.6	0.002
Q$783	O35593	PSDE_MOUSE	Psmd14	26S proteasome non-ATPase regulatory subunit 14	1	23.55	3	6116612	3600168	6594693	5419751	426900	206310	991974	560373	15.6	12.8	33.6	23.1	-1.7	0.004	1.1	0.7	-1.1	0.7	1.8	0.1	1.5	0.08	-1.2	0.7	0.02
Q$640	P17710-3	HXK1_MOUSE	Hk	Isoform HK1 of Hexokinase-1	1	35.51	23	6112775	3235919	5654980	5225315	547320	133719	477156	567577	20	9.2	18.9	24.3	-1.9	0.03	-1.1	0.8	-1.2	0.6	1.7	0.03	1.6	0.09	-1.1	0.8	0.002
Q$1584	Q8BFR4	GNS_MOUSE	Gns	N-acetylglucosamine-6-sulfatase	1	15.99	6	6087902	2773237	6086820	4696502	611142	164599	592485	241630	22.4	13.3	21.8	11.5	-2.2	0.02	-1	1	-1.3	0.2	2.2	0.02	1.7	0.001	-1.3	0.2	0.0002
Q$1450	Q61425	HCDH_MOUSE	Hadh	Hydroxyacyl-coenzyme A dehydrogenase, mitochondrial	1	37.58	4	6047539	4759012	5811951	5729183	693555	406720	525068	463769	25.6	19.1	20.2	18.1	-1.3	0.6	-1	1	-1.1	1	1.2	0.6	1.2	0.6	-1	1	0.4
Q$1149	P59999	ARPC4_MOUSE	Arpc4	Actin-related protein 2/3 complex subunit 4	0.9959	24.4	3	6040593	1794134	5440513	5429599	779695	242396	683703	754345	28.9	30.2	28.1	31.1	-3.4	0.02	-1.1	0.9	-1.1	0.9	3	0.006	3	0.03	-1	1	0.001
Q$24	Q5PR09	Q5PR09_MOUSE	Rpl32	Ribosomal protein L32	1	22.22	3	6036451	3590991	5578577	5076205	488818	327120	386418	486577	18.1	20.4	15.5	21.4	-1.7	0.02	-1.1	0.7	-1.2	0.5	1.6	0.02	1.4	0.1	-1.1	0.7	0.006
Q$1912	Q9D0R2	SYTC_MOUSE	Tars	Threonine--tRNA ligase, cytoplasmic	1	12.74	7	6023161	3686900	6373331	6118774	366365	160184	407431	691603	13.6	9.7	14.3	25.3	-1.6	0.002	1.1	0.9	1	0.9	1.7	0.002	1.7	0.09	-1	0.9	0.002
Q$1877	Q9CWF2	TBB2B_MOUSE	Tubb2b	Tubulin beta-2B chain	1	12.13	7	6002712	4349162	6777641	5764733	302902	323429	505418	312451	11.3	16.6	16.7	12.1	-1.4	0.03	1.1	0.4	-1	0.6	1.6	0.02	1.3	0.05	-1.2	0.3	0.002
Q$1698	Q8R1F1	NIBL1_MOUSE	Fam129b	Niban-like protein 1	1	11.21	5	5984277	2129496	4966818	4254074	920006	122358	491707	546809	34.4	12.8	22.1	28.7	-2.8	0.06	-1.2	0.6	-1.4	0.4	2.3	0.02	2	0.06	-1.2	0.6	0.002
Q$1515	Q6DFW4	NOP58_MOUSE	Nop58	Nucleolar protein 58	1	29.48	12	5961508	3566806	6730047	5843743	392015	113775	508800	479340	14.7	7.1	16.9	18.3	-1.7	0.02	1.1	0.6	-1	0.9	1.9	0.02	1.6	0.03	-1.2	0.6	0.0003
Q$1946	Q9D7N9	APMAP_MOUSE	Apmap	Adipocyte plasma membrane-associated protein	1	10.12	2	5957485	6903915	5179922	6158317	134527	4522698	754253	1257199	5	146.5	32.6	45.6	1.2	1	-1.2	0.9	1	1	-1.3	1	-1.1	1	1.2	1	1
Q$727	J3QJZ3	J3QJZ3_MOUSE	Gm6472	MCG116065	1	24.23	6	5949080	3741999	5540329	4741347	93764	282251	173808	395403	3.5	16.9	7	18.6	-1.6	0.0004	-1.1	0.2	-1.3	0.1	1.5	0.003	1.3	0.2	-1.2	0.2	0.0001
Q$1258	P70372	ELAV1_MOUSE	Elavl1	ELAV-like protein 1	1	17.48	5	5918672	2928995	5374254	4657541	333092	227050	607406	592917	12.6	17.3	25.3	28.5	-2	0.0004	-1.1	0.7	-1.3	0.3	1.8	0.03	1.6	0.1	-1.2	0.7	0.002
Q$914	P12970	RL7A_MOUSE	Rpl7a	60S ribosomal protein L7a	1	33.46	9	5887399	2266366	6132508	4661598	437154	135402	1011029	829286	16.6	13.4	36.9	39.8	-2.6	0.004	1	0.8	-1.3	0.5	2.7	0.09	2.1	0.2	-1.3	0.5	0.004
Q$173	S4R223	S4R223_MOUSE	Rps19	40S ribosomal protein S19	1	44.44	5	5865646	3732774	4775117	4654173	293289	1307885	818528	760453	11.2	78.3	38.3	36.5	-1.6	0.7	-1.2	0.7	-1.3	0.7	1.3	0.9	1.2	0.9	-1	0.9	0.4
Q$911	P12265	BGLR_MOUSE	Gusb	Beta-glucuronidase	1	10.03	4	5839749	2951675	5645598	4841376	571872	184546	564222	510414	21.9	14	22.3	23.6	-2	0.008	-1	0.8	-1.2	0.5	1.9	0.009	1.6	0.03	-1.2	0.5	0.003
Q$1548	Q6ZWQ9	Q6ZWQ9_MOUSE	Myl12a	MCG5400	1	41.28	6	5833142	5367903	5619294	5142989	396593	585424	463860	346260	15.2	24.4	18.5	15.1	-1.1	1	-1	1	-1.1	0.8	1	1	-1	1	-1.1	0.9	0.7
Q$1836	Q9CPW4	ARPC5_MOUSE	Arpc5	Actin-related protein 2/3 complex subunit 5	1	56.95	4	5830589	3289348	5249178	4772695	300163	270505	610431	439842	11.5	18.4	26	20.6	-1.8	0.001	-1.1	0.7	-1.2	0.2	1.6	0.09	1.5	0.09	-1.1	0.7	0.004
Q$690	G5E850	G5E850_MOUSE	Cyb5	Cytochrome b-5, isoform CRA_a	1	65.31	6	5814923	3531152	5660048	5749954	347289	417651	511027	316532	13.4	26.4	20.2	12.3	-1.6	0.02	-1	1	-1	1	1.6	0.05	1.6	0.02	1	1	0.002
Q$241	D3Z5N2	D3Z5N2_MOUSE	Stmn1	Stathmin	1	14.97	2	5812011	2207422	5456636	4946588	513346	126951	755790	824882	19.8	12.9	31	37.3	-2.6	0.009	-1.1	0.9	-1.2	0.8	2.5	0.06	2.2	0.1	-1.1	0.9	0.003
Q$1243	P68037	UB2L3_MOUSE	Ube2l3	Ubiquitin-conjugating enzyme E2 L3	1	48.7	5	5801160	2859787	5843700	4605512	195532	436312	432999	353645	7.5	34.1	16.6	17.2	-2	0.002	1	0.9	-1.3	0.06	2	0.006	1.6	0.06	-1.3	0.1	8e-05
Q$1731	Q91VA7	Q91VA7_MOUSE	Idh3b	Isocitrate dehydrogenase 3 (NAD+) beta	1	23.7	6	5788120	2968271	4973696	5065060	494905	147399	579123	683722	19.1	11.1	26	30.2	-1.9	0.02	-1.2	0.7	-1.1	0.7	1.7	0.1	1.7	0.1	1	0.9	0.009
Q$1129	P54775	PRS6B_MOUSE	Psmc4	26S protease regulatory subunit 6B	0.9998	12.44	3	5769827	3686707	6232284	5616145	348987	257507	743576	998544	13.5	15.6	26.7	39.8	-1.6	0.008	1.1	0.9	-1	0.9	1.7	0.06	1.5	0.4	-1.1	0.9	0.07
Q$835	P00493	HPRT_MOUSE	Hprt1	Hypoxanthine-guanine phosphoribosyltransferase	1	38.07	4	5768831	5155156	6715311	6052595	128161	174533	379238	313462	5	7.6	12.6	11.6	-1.1	0.1	1.2	0.1	1	0.4	1.3	0.03	1.2	0.1	-1.1	0.4	0.007
Q$1685	Q8K411-2	PREP_MOUSE	Pitrm	Isoform 2 of Presequence protease, mitochondrial	1	15.85	9	5757281	4101179	6065911	5549197	379932	184454	312452	367608	14.8	10.1	11.5	14.8	-1.4	0.02	1.1	0.8	-1	0.8	1.5	0.004	1.4	0.03	-1.1	0.7	0.003
Q$457	E9PW15	E9PW15_MOUSE	Suz12	Polycomb protein Suz12	0.9875	8.36	1	5757275	4701565	5125655	4204730	768830	436348	820633	255855	29.9	20.8	35.8	13.6	-1.2	0.8	-1.1	0.8	-1.4	0.4	1.1	0.8	-1.1	0.8	-1.2	0.8	0.4
Q$624	F8WGX5	F8WGX5_MOUSE	Dmxl1	DmX-like protein 1	0.9551	0.5	1	5747450	2715195	5490325	4711090	336822	373569	754996	487745	13.1	30.8	30.7	23.2	-2.1	0.002	-1	0.8	-1.2	0.3	2	0.05	1.7	0.05	-1.2	0.7	0.003
Q$1476	Q62167	DDX3X_MOUSE	Ddx3x	ATP-dependent RNA helicase DDX3X	1	21.6	11	5715616	3027675	5086872	4544657	448985	140279	475607	446910	17.6	10.4	20.9	22	-1.9	0.02	-1.1	0.6	-1.3	0.3	1.7	0.05	1.5	0.09	-1.1	0.6	0.002
Q$1481	Q62318-2	TIF1B_MOUSE	Trim2	Isoform 2 of Transcription intermediary factor 1-beta	1	10.2	3	5682869	2738767	5292165	4492285	730884	133543	431912	515871	28.8	10.9	18.2	25.7	-2.1	0.07	-1.1	0.7	-1.3	0.5	1.9	0.02	1.6	0.1	-1.2	0.5	0.004
Q$1158	P61027	RAB10_MOUSE	Rab10	Ras-related protein Rab-10	1	17	3	5668883	2794468	5096914	5659124	353013	182798	444959	946668	13.9	14.6	19.5	37.4	-2	0.0005	-1.1	0.7	-1	1	1.8	0.007	2	0.1	1.1	0.8	0.006
Q$1992	Q9EPB4	ASC_MOUSE	Pycard	Apoptosis-associated speck-like protein containing a CARD	1	8.81	2	5667182	2600094	5215653	4969333	420159	308705	462057	250730	16.6	26.5	19.8	11.3	-2.2	0.002	-1.1	0.7	-1.1	0.5	2	0.006	1.9	0.002	-1	0.7	0.0001
Q$1588	Q8BFZ9	ERLN2_MOUSE	Erlin2	Erlin-2	0.9999	14.71	3	5642791	2457541	5637212	4598077	505670	158915	736943	696111	20	14.5	29.2	33.9	-2.3	0.01	-1	1	-1.2	0.6	2.3	0.05	1.9	0.1	-1.2	0.6	0.003
Q$979	P22907-2	HEM3_MOUSE	Hmb	Isoform 2 of Porphobilinogen deaminase	1	20.06	5	5640185	3400191	6096768	5116128	384632	227986	556958	326484	15.2	15	20.4	14.3	-1.7	0.006	1.1	0.6	-1.1	0.6	1.8	0.01	1.5	0.01	-1.2	0.4	0.001
Q$1799	Q99KR7	PPIF_MOUSE	Ppif	Peptidyl-prolyl cis-trans isomerase F, mitochondrial	1	15.05	2	5620060	2516164	6371110	5431850	362980	279435	383033	734738	14.4	24.8	13.4	30.2	-2.2	0.0007	1.1	0.5	-1	0.8	2.5	0.0002	2.2	0.02	-1.2	0.5	0.0002
Q$1427	Q60973	RBBP7_MOUSE	Rbbp7	Histone-binding protein RBBP7	1	37.88	10	5614313	3241550	5556057	4905153	274393	248194	542502	295730	10.9	17.1	21.8	13.5	-1.7	0.001	-1	0.9	-1.1	0.3	1.7	0.02	1.5	0.01	-1.1	0.5	0.0008
Q$1987	Q9DCS9	NDUBA_MOUSE	Ndufb10	NADH dehydrogenase [ubiquinone] 1 beta subcomplex subunit 10	1	42.05	5	5603266	4920111	5848956	5457874	106286	364366	283821	232401	4.2	16.6	10.9	9.5	-1.1	0.5	1	0.7	-1	0.7	1.2	0.4	1.1	0.7	-1.1	0.7	0.1
Q$258	Q9Z2I4-2	ROBO3_MOUSE	Robo	Isoform 2 of Roundabout homolog 3	0.9746	7.96	2	5602063	7357937	6810374	6767941	216879	561325	317996	159974	8.7	17.1	10.4	5.3	1.3	0.08	1.2	0.07	1.2	0.02	-1.1	0.7	-1.1	0.7	-1	0.9	0.02
Q$1226	P63073	IF4E_MOUSE	Eif4e	Eukaryotic translation initiation factor 4E	1	11.52	2	5595792	2685880	7260740	7161504	796164	413405	1220773	506150	31.8	34.4	37.6	15.8	-2.1	0.05	1.3	0.5	1.3	0.4	2.7	0.04	2.7	0.0008	-1	0.9	0.003
Q$1914	Q9D0S9	HINT2_MOUSE	Hint2	Histidine triad nucleotide-binding protein 2, mitochondrial	0.9166	12.27	1	5580030	2582131	6191740	5169650	400890	321655	711750	918296	16.1	27.9	25.7	39.7	-2.2	0.002	1.1	0.8	-1.1	0.8	2.4	0.009	2	0.1	-1.2	0.8	0.005
Q$1538	Q6PFB2	Q6PFB2_MOUSE	Rcc1	Rcc1 protein	1	28.11	6	5555403	2242396	5818801	4712167	493803	129763	596443	556461	19.9	12.9	22.9	26.4	-2.5	0.01	1	0.7	-1.2	0.5	2.6	0.02	2.1	0.04	-1.2	0.5	0.0003
Q$221	D3YZZ5	D3YZZ5_MOUSE	Tmed7	Protein Tmed7	0.9945	13.84	2	5537281	2335509	5197865	4837444	424581	273573	432926	342996	17.1	26.2	18.6	15.9	-2.4	0.001	-1.1	0.8	-1.1	0.6	2.2	0.002	2.1	0.002	-1.1	0.8	6e-05
Q$763	O08997	ATOX1_MOUSE	Atox1	Copper transport protein ATOX1	1	47.06	4	5517321	3716772	5714359	5174333	405315	209260	622896	311493	16.4	12.6	24.4	13.5	-1.5	0.03	1	0.8	-1.1	0.8	1.5	0.06	1.4	0.03	-1.1	0.8	0.02
Q$1042	P35293	RAB18_MOUSE	Rab18	Ras-related protein Rab-18	1	27.18	4	5440389	4121129	4469620	4918440	292960	694584	522937	418790	12	37.7	26.2	19	-1.3	0.5	-1.2	0.5	-1.1	0.8	1.1	0.8	1.2	0.8	1.1	0.8	0.3
Q$575	F6THG2	F6THG2_MOUSE	Arpc1b	Actin-related protein 2/3 complex subunit 1B (Fragment)	1	30.48	4	5437570	2102371	4353237	3557804	513806	175250	462144	511393	21.1	18.6	23.7	32.1	-2.6	0.002	-1.2	0.3	-1.5	0.1	2.1	0.009	1.7	0.1	-1.2	0.3	0.0005
Q$2114	Q9Z2Y8	PROSC_MOUSE	Prosc	Proline synthase co-transcribed bacterial homolog protein	1	37.59	5	5436425	2468329	5298334	4294590	405484	294925	565871	564567	16.7	26.7	23.9	29.4	-2.2	0.002	-1	0.8	-1.3	0.4	2.1	0.01	1.7	0.08	-1.2	0.4	0.001
Q$1940	Q9D6J6	NDUV2_MOUSE	Ndufv2	NADH dehydrogenase [ubiquinone] flavoprotein 2, mitochondrial	1	21.77	4	5433967	2980277	5567108	5033502	290409	276015	365890	195844	12	20.7	14.7	8.7	-1.8	0.002	1	0.8	-1.1	0.6	1.9	0.002	1.7	0.002	-1.1	0.6	3e-05
Q$1884	Q9CXE7	TMED5_MOUSE	Tmed5	Transmembrane emp24 domain-containing protein 5	0.9996	21.4	3	5429971	3686807	6710070	6321421	593298	345210	822678	558524	24.4	20.9	27.4	19.8	-1.5	0.1	1.2	0.6	1.2	0.6	1.8	0.05	1.7	0.02	-1.1	0.7	0.01
Q$1291	P97425	ECP2_MOUSE	Ear2	Eosinophil cationic protein 2	1	44.87	4	5428893	3727554	7432715	6359963	601335	532802	505640	1545242	24.8	32	15.2	54.3	-1.5	0.2	1.4	0.2	1.2	0.8	2	0.006	1.7	0.4	-1.2	0.8	0.06
Q$838	P01887	B2MG_MOUSE	B2m	Beta-2-microglobulin	0.9999	26.89	2	5423322	3138520	6487007	5624318	629958	523412	797550	561050	26	37.3	27.5	22.3	-1.7	0.09	1.2	0.7	1	0.8	2.1	0.05	1.8	0.06	-1.2	0.7	0.01
Q$928	P14901	HMOX1_MOUSE	Hmox1	Heme oxygenase 1	1	20.76	5	5418466	2423842	5461095	5224571	438632	268329	681811	452081	18.1	24.8	27.9	19.3	-2.2	0.002	1	1	-1	1	2.3	0.01	2.2	0.004	-1	1	0.0008
Q$1943	Q9D6R2-2	IDH3A_MOUSE	Idh3	Isoform 2 of Isocitrate dehydrogenase [NAD] subunit alpha, mitochondrial	1	22.92	5	5415734	2833247	5336865	5028311	639429	277118	631748	432696	26.4	21.9	26.5	19.2	-1.9	0.03	-1	0.9	-1.1	0.9	1.9	0.03	1.8	0.02	-1.1	0.9	0.008
Q$1808	Q99LF4	RTCB_MOUSE	Rtcb	tRNA-splicing ligase RtcB homolog	0.9989	13.07	3	5410222	2357872	5680530	4903925	423240	157951	552906	421943	17.5	15	21.8	19.2	-2.3	0.0009	1	0.7	-1.1	0.7	2.4	0.01	2.1	0.002	-1.2	0.7	0.0001
Q$1262	P70460	VASP_MOUSE	Vasp	Vasodilator-stimulated phosphoprotein	1	17.07	2	5390376	2787557	5237823	4791786	579795	263518	339001	640170	24.1	21.1	14.5	29.9	-1.9	0.02	-1	0.9	-1.1	0.9	1.9	0.003	1.7	0.08	-1.1	0.9	0.005
Q$923	P14426	HA13_MOUSE	H2-D1	H-2 class I histocompatibility antigen, D-K alpha chain	1	16.57	5	5360429	3904371	5361762	5283995	203379	149496	206083	317715	8.5	8.6	8.6	13.4	-1.4	0.003	1	1	-1	1	1.4	0.003	1.4	0.02	-1	1	0.0006
Q$508	E9Q390	E9Q390_MOUSE	Myof	Myoferlin	1	6.54	10	5333999	3212210	5298933	5359919	247116	302135	838725	886539	10.4	21	35.4	37	-1.7	0.004	-1	1	1	1	1.6	0.2	1.7	0.2	1	1	0.08
Q$1553	Q6ZWZ7	Q6ZWZ7_MOUSE	Rpl17	60S ribosomal protein L17	1	28.26	6	5331643	2911623	5948015	5494581	603931	252237	789366	601319	25.3	19.4	29.7	24.5	-1.8	0.03	1.1	0.9	1	0.9	2	0.06	1.9	0.02	-1.1	0.9	0.01
Q$837	P01027	CO3_MOUSE	C3	Complement C3	0.9992	2.53	2	5304264	4521894	5488207	6143333	418245	712781	463912	1088147	17.6	35.2	18.9	39.6	-1.2	0.8	1	0.9	1.2	0.9	1.2	0.8	1.4	0.8	1.1	0.9	0.5
Q$1840	Q9CQ22	LTOR1_MOUSE	Lamtor1	Ragulator complex protein LAMTOR1	0.9522	8.07	1	5291860	5162230	5708690	5289480	210921	329039	479649	366171	8.9	14.3	18.8	15.5	-1	1	1.1	0.9	-1	1	1.1	0.9	1	1	-1.1	0.9	0.7
Q$547	E9QAP7	E9QAP7_MOUSE	Taf4a	Protein Taf4a	0.9774	10.27	2	5283548	2805682	6729621	5598373	875807	467643	823293	396539	37.1	37.3	27.4	15.8	-1.9	0.1	1.3	0.6	1.1	0.8	2.4	0.02	2	0.01	-1.2	0.6	0.006
Q$1437	Q61081	CDC37_MOUSE	Cdc37	Hsp90 co-chaperone Cdc37	1	18.47	5	5257281	2882263	4931726	4263168	384691	104488	416522	464105	16.4	8.1	18.9	24.3	-1.8	0.02	-1.1	0.6	-1.2	0.4	1.7	0.03	1.5	0.1	-1.2	0.5	0.002
Q$1309	Q01149	CO1A2_MOUSE	Col1a2	Collagen alpha-2(I) chain	0.9555	1.9	1	5246870	2118070	3976210	3251950	224715	137281	230429	316426	9.6	14.5	13	21.8	-2.5	1e-05	-1.3	0.01	-1.6	0.004	1.9	0.0006	1.5	0.02	-1.2	0.1	7e-07
Q$1945	Q9D6Z1	NOP56_MOUSE	Nop56	Nucleolar protein 56	1	26.38	11	5244602	3836090	6552171	4971408	278749	921974	853369	605632	11.9	53.7	29.1	27.2	-1.4	0.6	1.2	0.6	-1.1	0.7	1.7	0.3	1.3	0.6	-1.3	0.6	0.1
Q$1898	Q9CZ30	OLA1_MOUSE	Ola1	Obg-like ATPase 1	1	14.39	5	5215572	2828705	4869863	4202463	377941	222786	389091	440442	16.2	17.6	17.9	23.4	-1.8	0.004	-1.1	0.5	-1.2	0.3	1.7	0.009	1.5	0.09	-1.2	0.5	0.002
Q$1846	Q9CQB4	Q9CQB4_MOUSE	Uqcrb	Cytochrome b-c1 complex subunit 7	1	49.55	6	5200761	2959779	5884103	6153973	297919	325077	403443	614006	12.8	24.6	15.3	22.3	-1.8	0.005	1.1	0.5	1.2	0.5	2	0.003	2.1	0.007	1	0.7	0.0003
Q$1311	Q01730	RSU1_MOUSE	Rsu1	Ras suppressor protein 1	1	26.35	5	5179851	3018242	4840709	3907374	481542	269263	421125	405018	20.8	19.9	19.5	23.2	-1.7	0.03	-1.1	0.6	-1.3	0.3	1.6	0.03	1.3	0.3	-1.2	0.3	0.007
Q$1777	Q99J77	Q99J77_MOUSE	Nans	N-acetylneuraminic acid synthase (Sialic acid synthase)	1	21.45	4	5172074	2988415	5227110	4707635	116617	306011	525743	299228	5	22.9	22.5	14.2	-1.7	0.0009	1	0.9	-1.1	0.5	1.7	0.02	1.6	0.02	-1.1	0.7	0.0008
Q$1278	P84096	RHOG_MOUSE	Rhog	Rho-related GTP-binding protein RhoG	1	29.84	3	5167067	2481560	5468812	4200445	304634	275486	903786	542491	13.2	24.8	37	28.9	-2.1	0.001	1.1	0.8	-1.2	0.4	2.2	0.1	1.7	0.1	-1.3	0.5	0.008
Q$194	D3YX79	D3YX79_MOUSE	Gm8394	Proteasome subunit alpha type	1	12.86	2	5156560	4990235	4898450	4761280	227933	308649	120143	311706	9.9	13.8	5.5	14.6	-1	1	-1.1	0.9	-1.1	0.9	-1	1	-1	1	-1	1	0.7
Q$1071	P45376	ALDR_MOUSE	Akr1b1	Aldose reductase	1	26.58	6	5146951	3251407	6843163	4543148	424033	210878	774384	561436	18.4	14.5	25.3	27.6	-1.6	0.02	1.3	0.2	-1.1	0.4	2.1	0.04	1.4	0.2	-1.5	0.2	0.002
Q$1379	Q3UJB0	Q3UJB0_MOUSE	Sf3b2	Protein Sf3b2	1	9.79	7	5117239	3367110	5100597	4857749	448707	101992	496676	347655	19.6	6.8	21.8	16	-1.5	0.08	-1	1	-1.1	1	1.5	0.09	1.4	0.06	-1	1	0.01
Q$34	A2AFJ1	A2AFJ1_MOUSE	Rbbp7	Histone-binding protein RBBP7	1	31.25	9	5114224	2867908	5078164	4438156	250130	258508	520417	233199	10.9	20.2	22.9	11.7	-1.8	0.001	-1	1	-1.2	0.2	1.8	0.02	1.5	0.01	-1.1	0.5	0.0007
Q$244	D3Z2H9	D3Z2H9_MOUSE	Tpm3-rs7	Uncharacterized protein	1	27.02	7	5093088	3999112	5151436	4644632	477630	101332	281958	531066	21	5.7	12.2	25.6	-1.3	0.4	1	0.9	-1.1	0.8	1.3	0.03	1.2	0.8	-1.1	0.8	0.2
Q$1352	Q3TRH2	Q3TRH2_MOUSE	Psmd12	26S proteasome non-ATPase regulatory subunit 12	1	9.81	3	5080074	1731589	4296284	3367264	509906	160397	647529	434340	22.4	20.7	33.7	28.8	-2.9	0.01	-1.2	0.5	-1.5	0.1	2.5	0.06	1.9	0.04	-1.3	0.5	0.0009
Q$1654	Q8CB58	Q8CB58_MOUSE	Ptbp1	MCG13402, isoform CRA_d	1	31.7	9	5068400	3398668	5128282	4874264	256261	344593	672575	489150	11.3	22.7	29.3	22.4	-1.5	0.03	1	1	-1	1	1.5	0.2	1.4	0.2	-1.1	1	0.06
Q$2064	Q9R257	HEBP1_MOUSE	Hebp1	Heme-binding protein 1	1	41.05	5	5046711	2780947	4726869	4066636	282829	179076	300999	373175	12.5	14.4	14.2	20.5	-1.8	0.0009	-1.1	0.5	-1.2	0.2	1.7	0.003	1.5	0.06	-1.2	0.4	0.0003
Q$890	P10404	ENV1_MOUSE		MLV-related proviral Env polyprotein	0.9862	3.28	1	5011430	3351760	4773700	4296880	376280	273352	481602	310958	16.8	18.2	22.6	16.2	-1.5	0.04	-1	0.7	-1.2	0.5	1.4	0.2	1.3	0.2	-1.1	0.7	0.03
Q$1973	Q9DBZ5	EIF3K_MOUSE	Eif3k	Eukaryotic translation initiation factor 3 subunit K	1	15.6	2	5006924	1818936	4534637	3342864	163521	178616	335786	391100	7.3	22	16.6	26.2	-2.8	6e-06	-1.1	0.2	-1.5	0.02	2.5	0.0005	1.8	0.02	-1.4	0.1	3e-06
Q$949	P17563	SBP1_MOUSE	Selenbp1	Selenium-binding protein 1	1	15.89	5	4999483	2860286	5077773	4506438	595074	88783	503570	476532	26.6	6.9	22.2	23.6	-1.7	0.1	1	0.9	-1.1	0.8	1.8	0.06	1.6	0.1	-1.1	0.8	0.01
Q$1192	P62334	PRS10_MOUSE	Psmc6	26S protease regulatory subunit 10B	1	21.34	5	4991447	3381160	4936451	4497544	110078	655498	534071	446281	4.9	43.4	24.2	22.2	-1.5	0.3	-1	0.9	-1.1	0.7	1.5	0.4	1.3	0.6	-1.1	0.8	0.1
Q$1219	P63001	RAC1_MOUSE	Rac1	Ras-related C3 botulinum toxin substrate 1	1	27.6	4	4967833	3369748	4997981	5048445	276129	191812	391220	532260	12.4	12.7	17.5	23.6	-1.5	0.009	1	1	1	1	1.5	0.03	1.5	0.07	1	1	0.01
Q$725	O55143-2	AT2A2_MOUSE	Atp2a	Isoform SERCA2A of Sarcoplasmic/endoplasmic reticulum calcium ATPase 2	1	19.94	15	4967687	3230733	5199825	4854745	363418	235089	249446	275197	16.4	16.3	10.7	12.7	-1.5	0.02	1	0.9	-1	0.9	1.6	0.003	1.5	0.01	-1.1	0.8	0.0006
Q$1677	Q8K135-2	K319L_MOUSE	Kiaa0319	Isoform 2 of Dyslexia-associated protein KIAA0319-like protein	0.9052	0.74	1	4965800	2855947	4912300	3991310	560501	1312725	533660	491402	25.2	102.8	24.3	27.5	-1.7	0.7	-1	0.9	-1.2	0.7	1.7	0.7	1.4	0.7	-1.2	0.7	0.2
Q$1958	Q9D8W5	PSD12_MOUSE	Psmd12	26S proteasome non-ATPase regulatory subunit 12	1	5.7	2	4964586	1674694	4143821	3239237	492907	156014	631942	424732	22.2	20.8	34.1	29.3	-3	0.01	-1.2	0.5	-1.5	0.09	2.5	0.06	1.9	0.04	-1.3	0.5	0.0008
Q$898	P11031	TCP4_MOUSE	Sub1	Activated RNA polymerase II transcriptional coactivator p15	1	18.9	3	4945554	1749835	4348667	3274991	345544	131673	372329	601169	15.6	16.8	19.1	41	-2.8	0.0001	-1.1	0.3	-1.5	0.2	2.5	0.0009	1.9	0.2	-1.3	0.3	0.0002
Q$1260	P70404	IDHG1_MOUSE	Idh3g	Isocitrate dehydrogenase [NAD] subunit gamma 1, mitochondrial	1	27.99	6	4942951	3314716	5571026	4518537	215481	104243	434714	419857	9.7	7	17.4	20.8	-1.5	0.0008	1.1	0.4	-1.1	0.4	1.7	0.03	1.4	0.2	-1.2	0.3	0.001
Q$1368	Q3UA72	Q3UA72_MOUSE	Arpc5	Actin-related protein 2/3 complex subunit 5	1	72.83	3	4888633	2408999	4350639	3830672	291082	247365	567319	400723	13.3	23	29.2	23.4	-2	0.001	-1.1	0.7	-1.3	0.2	1.8	0.07	1.6	0.07	-1.1	0.7	0.003
Q$265	D3Z5N9	D3Z5N9_MOUSE	Gm5449	MCG49198	1	23.73	4	4886748	2310958	5296889	4831423	282560	138358	521425	252496	12.9	13.4	22	11.7	-2.1	0.0002	1.1	0.8	-1	0.9	2.3	0.01	2.1	0.0001	-1.1	0.8	3e-05
Q$1354	Q3TUE1	Q3TUE1_MOUSE	Fubp1	Far upstream element-binding protein 1	1	20.4	8	4883135	3008567	4585423	4905141	278064	139505	373839	1020569	12.7	10.4	18.2	46.5	-1.6	0.002	-1.1	0.9	1	1	1.5	0.02	1.6	0.4	1.1	0.9	0.09
Q$287	D6RCW7	D6RCW7_MOUSE	Capza2	F-actin-capping protein subunit alpha-2	1	26.44	3	4877618	1917007	4645017	3813532	512113	180706	556251	571427	23.5	21.1	26.8	33.5	-2.5	0.004	-1.1	0.8	-1.3	0.5	2.4	0.008	2	0.1	-1.2	0.5	0.002
Q$1099	P49717	MCM4_MOUSE	Mcm4	DNA replication licensing factor MCM4	1	9.4	6	4873862	2859080	4777689	4230753	576277	135654	721823	622208	26.4	10.6	33.8	32.9	-1.7	0.1	-1	0.9	-1.2	0.9	1.7	0.2	1.5	0.3	-1.1	0.9	0.08
Q$1449	Q61335	BAP31_MOUSE	Bcap31	B-cell receptor-associated protein 31	1	16.73	4	4862928	2053370	4580330	4434629	502747	72348	541183	540091	23.1	7.9	26.4	27.2	-2.4	0.03	-1.1	0.9	-1.1	0.9	2.2	0.04	2.2	0.04	-1	0.9	0.002
Q$114	B1AT36	B1AT36_MOUSE	Psmd12	26S proteasome non-ATPase regulatory subunit 12	1	2.98	1	4849767	1584563	4019927	3122283	482789	158668	618579	415145	22.3	22.4	34.4	29.7	-3.1	0.001	-1.2	0.5	-1.6	0.08	2.5	0.06	2	0.04	-1.3	0.5	0.0007
Q$1018	P29595	NEDD8_MOUSE	Nedd8	NEDD8	1	34.57	3	4832479	1447387	4453001	3915636	864151	181627	572273	613605	40	28.1	28.7	35	-3.3	0.07	-1.1	0.8	-1.2	0.8	3.1	0.03	2.7	0.07	-1.1	0.8	0.005
Q$1966	Q9DBG5	PLIN3_MOUSE	Plin3	Perilipin-3	1	19.45	6	4821555	2334091	4017894	3640003	630476	152555	403606	412668	29.2	14.6	22.5	25.4	-2.1	0.07	-1.2	0.5	-1.3	0.4	1.7	0.03	1.6	0.07	-1.1	0.5	0.007
Q$987	P24668	MPRD_MOUSE	M6pr	Cation-dependent mannose-6-phosphate receptor	1	19.06	5	4816289	2827085	4968832	4691663	439118	111969	515918	508668	20.4	8.9	23.2	24.2	-1.7	0.05	1	1	-1	1	1.8	0.06	1.7	0.08	-1.1	1	0.008
Q$1702	Q8R2Y8	PTH2_MOUSE	Ptrh2	Peptidyl-tRNA hydrolase 2, mitochondrial	1	19.34	2	4815954	1825806	4754129	4060038	545211	212690	525749	331582	25.3	26	24.7	18.3	-2.6	0.004	-1	0.9	-1.2	0.6	2.6	0.004	2.2	0.003	-1.2	0.6	0.0004
Q$1039	P35278	RAB5C_MOUSE	Rab5c	Ras-related protein Rab-5C	1	37.96	5	4812420	2378559	4960248	4389313	275209	66757	415114	346496	12.8	6.3	18.7	17.7	-2	0.004	1	0.8	-1.1	0.7	2.1	0.02	1.8	0.02	-1.1	0.7	6e-05
Q$126	B1AWH6	B1AWH6_MOUSE	Smc2	Structural maintenance of chromosomes protein 2 (Fragment)	1	4.67	2	4800500	3801038	6594095	6470085	790605	665531	915840	1180221	36.8	39.2	31.1	40.8	-1.3	0.6	1.4	0.5	1.3	0.6	1.7	0.2	1.7	0.4	-1	0.9	0.1
Q$751	O08547	SC22B_MOUSE	Sec22b	Vesicle-trafficking protein SEC22b	1	24.65	4	4782995	1610013	4149575	3500686	356680	210487	1160718	618898	16.7	29.2	62.5	39.5	-3	0.0004	-1.2	0.9	-1.4	0.3	2.6	0.3	2.2	0.1	-1.2	0.9	0.03
Q$1065	Q9DCW5	Q9DCW5_MOUSE	Cox6a1	Cytochrome c oxidase subunit 6A, mitochondrial	1	34.82	3	4772875	3680267	5427189	5331032	587167	331483	752220	872109	27.5	20.1	31	36.6	-1.3	0.5	1.1	0.9	1.1	0.9	1.5	0.3	1.4	0.5	-1	0.9	0.3
Q$2059	Q9R1J0	NSDHL_MOUSE	Nsdhl	Sterol-4-alpha-carboxylate 3-dehydrogenase, decarboxylating	1	14.09	4	4766322	3146486	5020325	5040086	333841	249652	485302	578158	15.7	17.7	21.6	25.7	-1.5	0.03	1.1	1	1.1	1	1.6	0.04	1.6	0.07	1	1	0.02
Q$785	O35643	AP1B1_MOUSE	Ap1b1	AP-1 complex subunit beta-1	1	15.48	9	4738648	2537754	4674099	4360053	322307	95966	260868	565446	15.2	8.5	12.5	29	-1.9	0.008	-1	0.9	-1.1	0.9	1.8	0.0003	1.7	0.1	-1.1	0.9	0.001
Q$1123	P53994	RAB2A_MOUSE	Rab2a	Ras-related protein Rab-2A	1	25.94	4	4737477	3648655	5123283	4408237	367260	281450	558969	307021	17.3	17.2	24.4	15.6	-1.3	0.2	1.1	0.8	-1.1	0.8	1.4	0.2	1.2	0.4	-1.2	0.6	0.09
Q$1885	Q9CXT8	MPPB_MOUSE	Pmpcb	Mitochondrial-processing peptidase subunit beta	1	16.97	5	4728716	3500236	5167030	5585681	384636	213881	554332	1082634	18.2	13.7	24	43.3	-1.4	0.1	1.1	0.9	1.2	0.9	1.5	0.1	1.6	0.4	1.1	0.9	0.2
Q$1851	Q9CQJ8	NDUB9_MOUSE	Ndufb9	NADH dehydrogenase [ubiquinone] 1 beta subcomplex subunit 9	0.9998	11.73	1	4722440	2248617	4933230	4419630	644620	333234	685561	899332	30.5	33.1	31.1	45.5	-2.1	0.05	1	1	-1.1	1	2.2	0.05	2	0.2	-1.1	1	0.04
Q$1041	P35282	RAB21_MOUSE	Rab21	Ras-related protein Rab-21	0.9366	4.5	1	4714320	3350840	4504680	4781220	359872	139694	396076	309888	17.1	9.3	19.7	14.5	-1.4	0.04	-1	0.9	1	0.9	1.3	0.1	1.4	0.02	1.1	0.9	0.02
Q$844	P02535-3	K1C10_MOUSE	Krt1	Isoform 3 of Keratin, type I cytoskeletal 10	1	19.48	6	4712423	2786468	6961651	3781726	2101020	1311283	2905690	688157	99.7	105.2	93.3	40.7	-1.7	0.9	1.5	0.9	-1.2	0.9	2.5	0.8	1.4	0.9	-1.8	0.9	0.5
Q$1327	Q07076	ANXA7_MOUSE	Anxa7	Annexin A7	1	5.18	2	4676180	2665643	4775609	3941262	517214	220924	751218	447188	24.7	18.5	35.2	25.4	-1.8	0.04	1	0.9	-1.2	0.7	1.8	0.2	1.5	0.2	-1.2	0.7	0.04
Q$626	F8WHL2	F8WHL2_MOUSE	Copa	Coatomer subunit alpha	1	8.43	7	4670352	2126984	4362322	3762942	425836	75436	603299	449333	20.4	7.9	30.9	26.7	-2.2	0.02	-1.1	0.7	-1.2	0.5	2.1	0.1	1.8	0.1	-1.2	0.7	0.004
Q$2103	Q9Z2I0	LETM1_MOUSE	Letm1	LETM1 and EF-hand domain-containing protein 1, mitochondrial	1	15.99	7	4626966	3218490	4968486	4645006	280917	159783	320008	295035	13.6	11.1	14.4	14.2	-1.4	0.01	1.1	0.8	1	1	1.5	0.007	1.4	0.01	-1.1	0.8	0.001
Q$2089	Q9Z0N1	IF2G_MOUSE	Eif2s3x	Eukaryotic translation initiation factor 2 subunit 3, X-linked	1	25.85	8	4621044	3249695	5403529	4410920	458675	450588	393095	461210	22.2	31	16.3	23.4	-1.4	0.3	1.2	0.4	-1	0.8	1.7	0.04	1.4	0.4	-1.2	0.4	0.03
Q$613	F7ANV6	F7ANV6_MOUSE	Anxa4	Annexin (Fragment)	1	34.42	6	4612935	1521034	3506583	2739484	256232	244331	185492	379966	12.4	35.9	11.8	31	-3	0.0001	-1.3	0.02	-1.7	0.01	2.3	0.001	1.8	0.05	-1.3	0.1	6e-06
Q$687	G3XA45	G3XA45_MOUSE	Vmn2r69	MCG59833	0.9394	2.35	1	4580570	2482300	4501170	4734620	317622	179736	382241	242199	15.5	16.2	19	11.4	-1.8	0.002	-1	0.9	1	0.9	1.8	0.006	1.9	0.0004	1.1	0.9	0.0001
Q$1055	P38060	HMGCL_MOUSE	Hmgcl	Hydroxymethylglutaryl-CoA lyase, mitochondrial	1	32.31	7	4556711	2601532	4439138	4211744	290399	94075	410194	303387	14.3	8.1	20.7	16.1	-1.8	0.001	-1	0.9	-1.1	0.8	1.7	0.04	1.6	0.02	-1.1	0.9	0.0008
Q$1325	Q05DV1	Q05DV1_MOUSE	Por	NADPH--cytochrome P450 reductase	1	16.8	8	4553410	2117250	4039651	3548162	369690	85038	280328	364514	18.2	9	15.5	23	-2.2	0.01	-1.1	0.5	-1.3	0.2	1.9	0.009	1.7	0.06	-1.1	0.5	0.0002
Q$2002	Q9ERS2	NDUAD_MOUSE	Ndufa13	NADH dehydrogenase [ubiquinone] 1 alpha subcomplex subunit 13	1	41.67	5	4550244	2546498	4032622	4316461	202923	204018	296023	487021	10	17.9	16.4	25.2	-1.8	0.0007	-1.1	0.5	-1.1	0.9	1.6	0.02	1.7	0.04	1.1	0.9	0.002
Q$1845	Q9CQA3	DHSB_MOUSE	Sdhb	Succinate dehydrogenase [ubiquinone] iron-sulfur subunit, mitochondrial	1	20.57	5	4539715	2495234	4841898	4368072	515656	279486	487556	485219	25.4	25	22.5	24.8	-1.8	0.04	1.1	0.9	-1	0.9	1.9	0.02	1.8	0.04	-1.1	0.9	0.008
Q$2019	Q9JJI8	RL38_MOUSE	Rpl38	60S ribosomal protein L38	0.9961	18.57	1	4536040	2309670	5248470	4683680	271072	313775	785526	659330	13.4	30.4	33.5	31.5	-2	0.004	1.2	0.8	1	0.8	2.3	0.04	2	0.05	-1.1	0.8	0.009
Q$1239	P63330	PP2AA_MOUSE	Ppp2ca	Serine/threonine-protein phosphatase 2A catalytic subunit alpha isoform	1	23.95	5	4523838	3107793	5245138	4782500	542021	223326	477683	387857	26.8	16.1	20.4	18.1	-1.5	0.2	1.2	0.7	1.1	0.7	1.7	0.02	1.5	0.03	-1.1	0.7	0.02
Q$1941	Q9D6J6-2	NDUV2_MOUSE	Ndufv	Isoform 2 of NADH dehydrogenase [ubiquinone] flavoprotein 2, mitochondrial	1	22.37	3	4520996	2149457	4618359	4158971	295579	253612	377982	191335	14.6	26.4	18.3	10.3	-2.1	0.001	1	0.8	-1.1	0.7	2.1	0.003	1.9	0.001	-1.1	0.7	4e-05
Q$1558	Q78ZA7	NP1L4_MOUSE	Nap1l4	Nucleosome assembly protein 1-like 4	1	29.33	6	4512834	1936558	4540844	3906380	222064	191608	444718	370601	11	22.1	21.9	21.2	-2.3	0.0001	1	1	-1.2	0.5	2.3	0.003	2	0.006	-1.2	0.5	9e-05
Q$759	O08795-2	GLU2B_MOUSE	Prkcs	Isoform 2 of Glucosidase 2 subunit beta	1	9.28	5	4510245	1883211	3835845	3072863	401727	294406	586549	409002	19.9	35	34.2	29.8	-2.4	0.004	-1.2	0.5	-1.5	0.1	2	0.09	1.6	0.1	-1.2	0.5	0.004
Q$207	D3Z7M9	D3Z7M9_MOUSE	Anp32a	Acidic leucine-rich nuclear phosphoprotein 32 family member A	1	38.63	9	4508781	2649597	4659902	4030027	316169	56280	546194	369465	15.7	4.7	26.2	20.5	-1.7	0.02	1	0.8	-1.1	0.7	1.8	0.09	1.5	0.09	-1.2	0.7	0.005
Q$1496	Q64152-2	BTF3_MOUSE	Btf	Isoform 2 of Transcription factor BTF3	1	61.73	6	4507795	2097213	4638393	4077290	185524	251443	567185	426762	9.2	26.8	27.3	23.4	-2.1	0.0003	1	0.8	-1.1	0.8	2.2	0.02	1.9	0.02	-1.1	0.8	0.0009
Q$799	O55029	COPB2_MOUSE	Copb2	Coatomer subunit beta'	1	6.3	4	4484261	2223831	4152926	3655036	1251073	455374	828395	516444	62.4	45.8	44.6	31.6	-2	0.4	-1.1	0.9	-1.2	0.9	1.9	0.4	1.6	0.4	-1.1	0.9	0.3
Q$1198	P62774	MTPN_MOUSE	Mtpn	Myotrophin	1	58.47	5	4478897	2310442	4480367	3672756	363921	176896	490882	419203	18.2	17.1	24.5	25.5	-1.9	0.004	1	1	-1.2	0.5	1.9	0.02	1.6	0.07	-1.2	0.5	0.003
Q$843	P02535	K1C10_MOUSE	Krt10	Keratin, type I cytoskeletal 10	1	20	6	4465810	2584079	5874835	3420275	2206372	1292790	2251326	661159	110.5	111.9	85.7	43.2	-1.7	0.9	1.3	0.9	-1.3	0.9	2.3	0.8	1.3	0.9	-1.7	0.9	0.6
Q$559	O70133-2	DHX9_MOUSE	Dhx	Isoform 2 of ATP-dependent RNA helicase A	1	10.28	12	4451272	2662443	4589179	4357911	475780	366019	504712	566736	23.9	30.7	24.6	29.1	-1.7	0.09	1	1	-1	1	1.7	0.09	1.6	0.1	-1.1	1	0.04
Q$1403	Q5SUR0	PUR4_MOUSE	Pfas	Phosphoribosylformylglycinamidine synthase	0.9988	1.05	1	4442090	2111290	3945180	3359830	496785	239090	532958	376908	25	25.3	30.2	25.1	-2.1	0.02	-1.1	0.6	-1.3	0.3	1.9	0.07	1.6	0.09	-1.2	0.6	0.008
Q$1874	Q9CU62	SMC1A_MOUSE	Smc1a	Structural maintenance of chromosomes protein 1A	0.9991	4.06	4	4428826	1904648	3960200	4129881	444554	37596	661107	563736	22.4	4.4	37.3	30.5	-2.3	0.03	-1.1	0.9	-1.1	0.9	2.1	0.1	2.2	0.08	1	0.9	0.008
Q$562	F2Z452	F2Z452_MOUSE	Atp5l-ps1	Uncharacterized protein	1	43.69	3	4414989	3338049	5948638	4923936	491055	499199	275215	255492	24.9	33.4	10.3	11.6	-1.3	0.3	1.3	0.1	1.1	0.4	1.8	0.01	1.5	0.1	-1.2	0.1	0.002
Q$1604	Q8BHN3-2	GANAB_MOUSE	Gana	Isoform 2 of Neutral alpha-glucosidase AB	1	18.32	13	4405655	2513609	4226299	3791225	390781	105035	226910	354244	19.8	9.3	12	20.9	-1.8	0.03	-1	0.7	-1.2	0.6	1.7	0.0008	1.5	0.08	-1.1	0.6	0.001
Q$190	D3YX47	D3YX47_MOUSE	Rpl21-ps6	MCG20932	0.9998	14.84	3	4393654	1286880	3763621	3194078	679594	157698	494477	557881	34.6	27.4	29.4	39.1	-3.4	0.04	-1.2	0.7	-1.4	0.5	2.9	0.03	2.5	0.09	-1.2	0.7	0.003
Q$810	Q8BH40	Q8BH40_MOUSE	Stx7	Syntaxin 7	1	24.9	4	4388911	1848418	4561607	3679793	536415	130471	433849	402572	27.3	15.8	21.3	24.5	-2.4	0.03	1	0.8	-1.2	0.5	2.5	0.01	2	0.01	-1.2	0.4	0.0008
Q$967	P20065-2	TYB4_MOUSE	Tmsb4	Isoform Short of Thymosin beta-4	1	43.18	3	4366891	1007971	3092024	2501524	132374	203794	348525	421395	6.8	45.2	25.2	37.7	-4.3	4e-06	-1.4	0.04	-1.7	0.04	3.1	0.004	2.5	0.04	-1.2	0.3	7e-06
Q$720	H7BWZ3	H7BWZ3_MOUSE	Arpc3	Actin-related protein 2/3 complex subunit 3	1	6.47	1	4360610	1526180	4084065	3141090	268092	94215	518698	609704	13.7	13.8	28.4	43.4	-2.9	5e-05	-1.1	0.6	-1.4	0.3	2.7	0.03	2.1	0.2	-1.3	0.5	0.001
Q$1972	Q9DBS1	TMM43_MOUSE	Tmem43	Transmembrane protein 43	1	13.25	3	4356333	2771787	3976459	3821022	340622	371292	344447	186273	17.5	30	19.4	10.9	-1.6	0.08	-1.1	0.7	-1.1	0.5	1.4	0.2	1.4	0.2	-1	0.7	0.02
Q$1074	P46425	GSTP2_MOUSE	Gstp2	Glutathione S-transferase P 2	1	54.29	5	4355397	3553908	3949990	4040514	313812	122139	353518	333447	16.1	7.7	20	18.5	-1.2	0.2	-1.1	0.8	-1.1	0.8	1.1	0.8	1.1	0.7	1	0.9	0.3
Q$1110	P51174	ACADL_MOUSE	Acadl	Long-chain specific acyl-CoA dehydrogenase, mitochondrial	1	9.07	2	4314864	4303306	5328576	4710565	279621	342355	479301	374235	14.5	17.8	20.1	17.8	-1	1	1.2	0.5	1.1	0.8	1.2	0.5	1.1	0.8	-1.1	0.8	0.2
Q$1526	Q6P069-2	SORCN_MOUSE	Sr	Isoform 2 of Sorcin	1	23.5	3	4308183	1911264	3561221	2900191	224773	219446	275365	197262	11.7	25.7	17.3	15.2	-2.3	0.0004	-1.2	0.1	-1.5	0.008	1.9	0.008	1.5	0.03	-1.2	0.1	1e-05
Q$541	E9Q8T1	E9Q8T1_MOUSE	Tacc2	Transforming acidic coiled-coil-containing protein 2	0.9873	7.43	4	4279060	6063439	5240034	5783033	432987	1137210	974060	1330376	22.6	41.9	41.6	51.4	1.4	0.7	1.2	0.9	1.4	0.8	-1.2	0.9	-1	0.9	1.1	0.9	0.6
Q$1160	P62838	UB2D2_MOUSE	Ube2d2	Ubiquitin-conjugating enzyme E2 D2	0.9999	28.57	2	4264680	1860073	4046845	3670285	173358	212604	481818	519596	9.1	25.6	26.6	31.7	-2.3	0.0001	-1.1	0.8	-1.2	0.7	2.2	0.02	2	0.05	-1.1	0.8	0.001
Q$1150	P60122	RUVB1_MOUSE	Ruvbl1	RuvB-like 1	1	15.35	4	4247785	1848216	4005933	3272160	723656	181906	484435	394834	38.1	22	27	27	-2.3	0.1	-1.1	0.8	-1.3	0.6	2.2	0.02	1.8	0.06	-1.2	0.6	0.01
Q$277	D3Z7C8	D3Z7C8_MOUSE	Bcat2	Branched-chain-amino-acid aminotransferase	1	17.78	5	4247455	2700505	4029589	3753327	285196	195618	354197	120045	15	16.2	19.7	7.2	-1.6	0.01	-1.1	0.7	-1.1	0.4	1.5	0.04	1.4	0.01	-1.1	0.7	0.003
Q$234	Q8BML9	Q8BML9_MOUSE	Qars	Glutaminyl-tRNA synthetase	0.9994	5.94	3	4241698	4134840	5574788	4990309	400594	675939	607737	618708	21.1	36.6	24.4	27.7	-1	0.9	1.3	0.5	1.2	0.8	1.3	0.6	1.2	0.8	-1.1	0.8	0.3
Q$1648	Q8C605	Q8C605_MOUSE	Pfkp	6-phosphofructokinase	1	13.52	5	4229821	1935341	3779805	3257412	761971	289986	523488	299481	40.3	33.5	31	20.6	-2.2	0.09	-1.1	0.7	-1.3	0.6	2	0.08	1.7	0.08	-1.2	0.7	0.03
Q$1174	P62137	PP1A_MOUSE	Ppp1ca	Serine/threonine-protein phosphatase PP1-alpha catalytic subunit	1	23.94	6	4214888	2770105	5219007	4365289	167976	227681	444187	574694	8.9	18.4	19	29.4	-1.5	0.006	1.2	0.2	1	0.8	1.9	0.006	1.6	0.1	-1.2	0.5	0.004
Q$1549	Q6ZWU9	RS27_MOUSE	Rps27	40S ribosomal protein S27	1	30.95	5	4201896	2023814	4641872	4299919	396189	118904	462091	399345	21.1	13.1	22.3	20.8	-2.1	0.02	1.1	0.9	1	0.9	2.3	0.02	2.1	0.02	-1.1	0.9	0.0005
Q$1543	Q6ZQ38	CAND1_MOUSE	Cand1	Cullin-associated NEDD8-dissociated protein 1	0.9683	1.54	1	4201800	1810300	3784070	3560220	353702	160867	258711	317734	18.8	19.9	15.3	20	-2.3	0.001	-1.1	0.6	-1.2	0.5	2.1	0.001	2	0.005	-1.1	0.6	0.0001
Q$1038	P35276	RAB3D_MOUSE	Rab3d	Ras-related protein Rab-3D	1	6.85	1	4180340	5623330	3687870	3533220	283731	2511325	373404	477178	15.2	99.9	22.6	30.2	1.3	0.9	-1.1	0.9	-1.2	0.9	-1.5	0.9	-1.6	0.9	-1	0.9	0.7
Q$33	A2AFI9	A2AFI9_MOUSE	Rbbp7	Histone-binding protein RBBP7	1	34.72	8	4167466	2240484	4165534	3604486	213090	143462	409093	174040	11.4	14.3	22	10.8	-1.9	0.0004	-1	1	-1.2	0.2	1.9	0.009	1.6	0.002	-1.2	0.4	0.0002
Q$1741	Q91WJ8-2	FUBP1_MOUSE	Fubp	Isoform 2 of Far upstream element-binding protein 1	1	15.92	7	4158593	2893822	4373835	3697976	87412	143463	340897	253899	4.7	11.1	17.4	15.4	-1.4	0.0004	1.1	0.6	-1.1	0.3	1.5	0.02	1.3	0.1	-1.2	0.3	0.002
Q$1078	P46664	PURA2_MOUSE	Adss	Adenylosuccinate synthetase isozyme 2	0.9999	11.62	3	4156726	2500023	3764149	3270697	196233	213910	377245	148193	10.6	19.1	22.4	10.1	-1.7	0.003	-1.1	0.4	-1.3	0.03	1.5	0.07	1.3	0.07	-1.2	0.4	0.002
Q$1441	Q61166	MARE1_MOUSE	Mapre1	Microtubule-associated protein RP/EB family member 1	1	27.24	4	4146508	2384200	4265390	3618434	326041	199328	536568	552591	17.6	18.7	28.1	34.1	-1.7	0.01	1	0.9	-1.1	0.8	1.8	0.05	1.5	0.2	-1.2	0.8	0.03
Q$1456	Q61646	HPT_MOUSE	Hp	Haptoglobin	0.9926	2.31	1	4144560	1831711	4275970	3921300	521394	296170	642833	752592	28.1	36.2	33.6	42.9	-2.3	0.03	1	1	-1.1	1	2.3	0.04	2.1	0.1	-1.1	1	0.03
Q$42	A2AH25	A2AH25_MOUSE	Arhgap1	Rho GTPase-activating protein 1	0.9991	3.76	1	4130090	1001870	2118320	1854425	322552	132357	247112	354605	17.5	29.5	26.1	42.8	-4.1	0.0001	-1.9	0.006	-2.2	0.006	2.1	0.01	1.9	0.1	-1.1	0.6	5e-06
Q$1093	P48999	LOX5_MOUSE	Alox5	Arachidonate 5-lipoxygenase	1	16.77	7	4122920	3469889	4879731	4764271	229650	509961	359141	484392	12.5	32.9	16.5	22.7	-1.2	0.6	1.2	0.4	1.2	0.6	1.4	0.3	1.4	0.4	-1	0.9	0.1
Q$1976	Q9DC69	NDUA9_MOUSE	Ndufa9	NADH dehydrogenase [ubiquinone] 1 alpha subcomplex subunit 9, mitochondrial	1	18.83	5	4120612	2411981	3965824	3854362	295323	229689	458642	372004	16	21.3	25.9	21.6	-1.7	0.01	-1	1	-1.1	0.9	1.6	0.06	1.6	0.05	-1	1	0.01
Q$1256	P70333	HNRH2_MOUSE	Hnrnph2	Heterogeneous nuclear ribonucleoprotein H2	1	21.16	8	4108745	2685686	4345492	3782900	205950	106013	369401	316834	11.2	8.8	19	18.7	-1.5	0.002	1.1	0.7	-1.1	0.7	1.6	0.04	1.4	0.04	-1.1	0.6	0.002
Q$263	D3Z563	D3Z563_MOUSE	Dbi	Acyl-CoA-binding protein	1	44.44	2	4101995	1556962	3347782	2797840	281189	193503	387602	387415	15.3	27.8	25.9	31	-2.6	0.0004	-1.2	0.3	-1.5	0.08	2.2	0.02	1.8	0.08	-1.2	0.3	0.0004
Q$736	Q9CQE8	CN166_MOUSE	Gm10704	UPF0568 protein C14orf166 homolog	1	14.75	2	4095258	1660844	3800747	3390478	358201	195383	487134	546487	19.6	26.3	28.7	36	-2.5	0.002	-1.1	0.8	-1.2	0.7	2.3	0.02	2	0.07	-1.1	0.8	0.004
Q$808	O70404	VAMP8_MOUSE	Vamp8	Vesicle-associated membrane protein 8	1	44.55	3	4093270	2035006	3682477	3522973	113871	234036	372764	376687	6.2	25.7	22.6	23.9	-2	0.0003	-1.1	0.6	-1.2	0.5	1.8	0.03	1.7	0.04	-1	0.8	0.0009
Q$1186	P62305	RUXE_MOUSE	Snrpe	Small nuclear ribonucleoprotein E	1	69.57	5	4071648	2891869	4088858	3620962	284552	55618	495326	441604	15.6	4.3	27.1	27.3	-1.4	0.08	1	1	-1.1	0.8	1.4	0.3	1.3	0.5	-1.1	0.8	0.1
Q$1346	Q3THK7	GUAA_MOUSE	Gmps	GMP synthase [glutamine-hydrolyzing]	1	9.81	4	4064360	2757079	4990914	3677824	308791	201025	520668	419695	17	16.3	23.3	25.5	-1.5	0.04	1.2	0.3	-1.1	0.5	1.8	0.02	1.3	0.3	-1.4	0.3	0.007
Q$1775	Q925I1-2	ATAD3_MOUSE	Atad	Isoform 2 of ATPase family AAA domain-containing protein 3	0.9814	5.47	2	4053080	2358585	4088685	3638700	252949	140498	232072	284384	14	13.3	12.7	17.5	-1.7	0.002	1	0.9	-1.1	0.6	1.7	0.001	1.5	0.01	-1.1	0.6	0.0002
Q$910	P11983-2	TCPA_MOUSE	Tcp	Isoform 2 of T-complex protein 1 subunit alpha	1	17.16	5	4039715	2601580	4287471	3747141	196000	158568	399217	349088	10.8	13.6	20.8	20.8	-1.6	0.003	1.1	0.7	-1.1	0.7	1.6	0.02	1.4	0.07	-1.1	0.7	0.005
Q$1922	Q9D1D4	TMEDA_MOUSE	Tmed10	Transmembrane emp24 domain-containing protein 10	1	17.35	4	4035399	3129602	4017411	4035155	200562	430430	341233	176498	11.1	30.8	19	9.8	-1.3	0.4	-1	1	-1	1	1.3	0.5	1.3	0.4	1	1	0.1
Q$108	B1AQ77	B1AQ77_MOUSE	Krt15	Keratin 15, isoform CRA_a	1	1.97	2	4026581	2434402	4039123	2388180	1799245	963614	1401898	406956	99.9	88.5	77.6	38.1	-1.7	0.9	1	1	-1.7	0.9	1.7	0.9	-1	1	-1.7	0.9	0.7
Q$1063	P42125	ECI1_MOUSE	Eci1	Enoyl-CoA delta isomerase 1, mitochondrial	1	11.76	2	4019390	3066745	5432395	4952124	260578	240846	720497	604886	14.5	17.6	29.7	27.3	-1.3	0.1	1.4	0.3	1.2	0.4	1.8	0.08	1.6	0.1	-1.1	0.6	0.02
Q$2075	Q9WUM3	COR1B_MOUSE	Coro1b	Coronin-1B	1	17.77	4	3996706	2240711	4627372	3541754	323298	238087	638082	387459	18.1	23.8	30.8	24.5	-1.8	0.01	1.2	0.6	-1.1	0.6	2.1	0.04	1.6	0.08	-1.3	0.5	0.008
Q$876	P08399	PHXR5_MOUSE	Phxr5	Putative per-hexamer repeat protein 5	0.997	16.52	2	3989627	2894941	5198994	5270888	383890	352301	568771	678551	21.5	27.2	24.5	28.8	-1.4	0.2	1.3	0.3	1.3	0.3	1.8	0.05	1.8	0.07	1	0.9	0.01
Q$35	A2AFK7	A2AFK7_MOUSE	Eif4a3	Eukaryotic initiation factor 4A-III (Fragment)	1	5.35	2	3984229	1612625	3940805	3372217	525697	123276	738590	728129	29.5	17.1	41.9	48.3	-2.5	0.05	-1	1	-1.2	0.9	2.4	0.2	2.1	0.3	-1.2	0.9	0.04
Q$2074	Q9WUK2-2	IF4H_MOUSE	Eif4	Isoform Short of Eukaryotic translation initiation factor 4H	1	25.88	4	3983002	2521113	4181707	3709551	290471	271657	577717	377328	16.3	24.1	30.9	22.7	-1.6	0.04	1	0.9	-1.1	0.9	1.7	0.1	1.5	0.1	-1.1	0.9	0.04
Q$1594	Q8BGQ7	SYAC_MOUSE	Aars	Alanine--tRNA ligase, cytoplasmic	1	10.64	6	3963359	4627707	4547391	4256074	246168	303540	300554	249713	13.9	14.7	14.8	13.1	1.2	0.6	1.1	0.6	1.1	0.8	-1	0.9	-1.1	0.8	-1.1	0.8	0.3
Q$1956	Q9D8U8	SNX5_MOUSE	Snx5	Sorting nexin-5	0.9994	11.39	4	3956626	2392541	3262761	3470661	333550	274461	234112	476046	18.9	25.7	16	30.7	-1.7	0.04	-1.2	0.3	-1.1	0.7	1.4	0.2	1.5	0.3	1.1	0.7	0.04
Q$1562	Q7TMK9-2	HNRPQ_MOUSE	Syncri	Isoform 2 of Heterogeneous nuclear ribonucleoprotein Q	1	28.83	10	3950548	1827078	3967982	3242306	300970	133350	538577	466109	17	16.3	30.4	32.1	-2.2	0.001	1	1	-1.2	0.6	2.2	0.07	1.8	0.1	-1.2	0.6	0.004
Q$1911	Q9D0M3-2	CY1_MOUSE	Cyc	Isoform 2 of Cytochrome c1, heme protein, mitochondrial	1	33.83	5	3948366	2548372	4220900	3643438	312481	447938	396915	388810	17.7	39.3	21	23.9	-1.5	0.2	1.1	0.8	-1.1	0.8	1.7	0.1	1.4	0.3	-1.2	0.7	0.04
Q$814	O88207	CO5A1_MOUSE	Col5a1	Collagen alpha-1(V) chain	0.9933	5.71	2	3946500	1437444	2424486	1768863	421562	527043	620415	376768	23.9	82	57.2	47.6	-2.7	0.03	-1.6	0.3	-2.2	0.03	1.7	0.6	1.2	0.6	-1.4	0.6	0.01
Q$1861	Q9CQW9	IFM3_MOUSE	Ifitm3	Interferon-induced transmembrane protein 3	1	20.44	3	3945317	2432624	3802000	3979739	269023	215650	348777	382796	15.2	19.8	20.5	21.5	-1.6	0.01	-1	1	1	1	1.6	0.04	1.6	0.04	1	1	0.008
Q$706	H3BK79	H3BK79_MOUSE	Nucb1	Nucleobindin-1 (Fragment)	1	20.66	5	3941844	2056243	4433970	3841700	261629	142468	505258	262831	14.8	15.5	25.5	15.3	-1.9	0.001	1.1	0.7	-1	0.8	2.2	0.03	1.9	0.002	-1.2	0.7	0.0005
Q$1960	Q9DAW6	PRP4_MOUSE	Prpf4	U4/U6 small nuclear ribonucleoprotein Prp4	0.9992	2.3	1	3919030	1769330	4105320	3239920	376850	109892	398735	352996	21.5	13.9	21.7	24.4	-2.2	0.02	1	0.7	-1.2	0.4	2.3	0.02	1.8	0.05	-1.3	0.4	0.0005
Q$1737	Q91VM5	RMXL1_MOUSE	Rbmxl1	RNA binding motif protein, X-linked-like-1	1	15.21	5	3913581	2112406	3470721	2861667	215541	141208	333696	437847	12.3	14.9	21.5	34.2	-1.9	0.0007	-1.1	0.5	-1.4	0.2	1.6	0.03	1.4	0.4	-1.2	0.5	0.004
Q$468	E9PY39	E9PY39_MOUSE	Gm20431	Protein Gm20431	1	11.59	4	3911308	2301414	3442274	4181713	352457	901996	458363	1477148	20.1	87.6	29.8	79	-1.7	0.6	-1.1	0.8	1.1	0.9	1.5	0.8	1.8	0.8	1.2	0.9	0.5
Q$554	E9QJW9	E9QJW9_MOUSE	Tpsb2	Tryptase beta-2	1	27.54	6	3907136	2304130	4001973	3241538	299336	163728	450372	149507	17.1	15.9	25.2	10.3	-1.7	0.009	1	0.9	-1.2	0.2	1.7	0.03	1.4	0.01	-1.2	0.3	0.003
Q$1153	P60764	RAC3_MOUSE	Rac3	Ras-related C3 botulinum toxin substrate 3	1	4.69	1	3906033	11758157	3884040	7622303	391493	6563309	295413	4138394	22.4	124.8	17	121.4	3	0.9	-1	1	2	0.9	-3	0.9	-1.5	0.9	2	0.9	0.4
Q$1417	Q60648	SAP3_MOUSE	Gm2a	Ganglioside GM2 activator	1	40.41	4	3904419	1818353	4102556	3770713	463385	234732	495533	724389	26.5	28.9	27	43	-2.1	0.02	1.1	1	-1	1	2.3	0.02	2.1	0.1	-1.1	1	0.02
Q$2088	Q9Z0J0	NPC2_MOUSE	Npc2	Epididymal secretory protein E1	1	28.19	3	3901176	1811841	3933769	3601366	615885	179217	470370	426268	35.3	22.1	26.7	26.5	-2.2	0.1	1	1	-1.1	0.9	2.2	0.02	2	0.02	-1.1	0.9	0.01
Q$1227	P63085	MK01_MOUSE	Mapk1	Mitogen-activated protein kinase 1	0.98	2.51	1	3888290	1538295	1755270	2205479	1475728	847604	237021	722434	84.9	123.2	30.2	73.2	-2.5	0.7	-2.2	0.7	-1.8	0.8	1.1	0.9	1.4	0.9	1.3	0.9	0.3
Q$143	B7ZBY7	B7ZBY7_MOUSE	Ube2v1	Ubiquitin-conjugating enzyme E2 variant 1	1	18.5	3	3875044	2274686	3418134	4161157	352871	904062	458392	1477791	20.4	88.9	30	79.4	-1.7	0.6	-1.1	0.8	1.1	0.9	1.5	0.8	1.8	0.8	1.2	0.9	0.5
Q$1567	Q7TSV4	PGM2_MOUSE	Pgm2	Phosphoglucomutase-2	0.9998	12.1	3	3873126	3795013	5301949	5335933	220835	513358	411842	395967	12.7	30.2	17.4	16.6	-1	1	1.4	0.08	1.4	0.07	1.4	0.2	1.4	0.2	1	1	0.02
Q$1521	Q6IRU2	TPM4_MOUSE	Tpm4	Tropomyosin alpha-4 chain	0.9999	22.18	3	3870292	2658318	4409215	4306953	442955	248218	697278	192004	25.6	20.9	35.4	10	-1.5	0.2	1.1	0.8	1.1	0.8	1.7	0.2	1.6	0.005	-1	0.9	0.05
Q$6	P84099	RL19_MOUSE	Rpl19	60S ribosomal protein L19	1	13.27	4	3855319	1869056	3623075	2953509	176774	173868	273086	420265	10.3	20.8	16.9	31.8	-2.1	0.0003	-1.1	0.5	-1.3	0.2	1.9	0.003	1.6	0.2	-1.2	0.4	0.0006
Q$578	F6UFG6	F6UFG6_MOUSE	Anp32a	Acidic leucine-rich nuclear phosphoprotein 32 family member A (Fragment)	1	60.14	8	3848067	2432659	4056260	3588187	241982	45568	454906	313088	14.1	4.2	25.1	19.5	-1.6	0.02	1.1	0.8	-1.1	0.8	1.7	0.1	1.5	0.1	-1.1	0.8	0.007
Q$1491	Q62523	ZYX_MOUSE	Zyx	Zyxin	0.9999	14.54	5	3845952	1573222	4001143	3638807	313383	134691	470681	646527	18.2	19.1	26.3	39.7	-2.4	0.001	1	1	-1.1	1	2.5	0.03	2.3	0.1	-1.1	1	0.004
Q$1151	P60229	EIF3E_MOUSE	Eif3e	Eukaryotic translation initiation factor 3 subunit E	1	13.03	4	3842305	2149415	4053606	3610772	382538	51030	515035	430700	22.3	5.3	28.4	26.7	-1.8	0.06	1.1	0.9	-1.1	0.9	1.9	0.1	1.7	0.1	-1.1	0.9	0.01
Q$586	F6VYK1	F6VYK1_MOUSE	Pkd1l1	Polycystic kidney disease protein 1-like 1 (Fragment)	0.9749	3.37	2	3836454	1812163	3910714	3653395	609590	468976	766672	448130	35.5	57.9	43.8	27.4	-2.1	0.1	1	1	-1.1	1	2.2	0.2	2	0.1	-1.1	1	0.07
Q$769	O09159	MA2B1_MOUSE	Man2b1	Lysosomal alpha-mannosidase	1	6.02	4	3834783	1535341	3300379	3224475	279358	130389	449962	440527	16.3	19	30.5	30.5	-2.5	0.0004	-1.2	0.6	-1.2	0.6	2.1	0.07	2.1	0.07	-1	0.9	0.002
Q$792	O35972	RM23_MOUSE	Mrpl23	39S ribosomal protein L23, mitochondrial	0.9207	8.9	1	3825310	2590040	3950910	3629620	232022	294091	389635	119201	13.6	25.4	22.1	7.3	-1.5	0.06	1	0.8	-1.1	0.8	1.5	0.09	1.4	0.06	-1.1	0.8	0.01
Q$1819	Q99N15	Q99N15_MOUSE	Hsd17b10	17beta-hydroxysteroid dehydrogenase type 10/short chain L-3-hydroxyacyl-CoA dehydrogenase	1	47.13	7	3823825	2296301	3396140	3133375	773167	212213	347190	284142	45.2	20.7	22.9	20.3	-1.7	0.4	-1.1	0.8	-1.2	0.8	1.5	0.2	1.4	0.2	-1.1	0.8	0.2
Q$87	Q9CQI7	RU2B_MOUSE	Snrpb2	U2 small nuclear ribonucleoprotein B''	0.9999	14.22	2	3813860	3376390	4318610	3904540	162839	326794	280979	373307	9.5	21.6	14.5	21.4	-1.1	0.7	1.1	0.6	1	0.8	1.3	0.3	1.2	0.7	-1.1	0.7	0.2
Q$1378	Q6PDG5-2	SMRC2_MOUSE	Smarcc	Isoform 2 of SWI/SNF complex subunit SMARCC2	0.9759	0.73	1	3805267	2159450	3790163	3401937	585474	328964	406733	308898	34.4	34.1	24	20.3	-1.8	0.2	-1	1	-1.1	0.9	1.8	0.08	1.6	0.1	-1.1	0.9	0.04
Q$2014	Q9JIF7	COPB_MOUSE	Copb1	Coatomer subunit beta	1	5.04	3	3802950	2849888	4168539	3486949	153020	241794	389563	480112	9	19	20.9	30.8	-1.3	0.06	1.1	0.7	-1.1	0.7	1.5	0.1	1.2	0.7	-1.2	0.7	0.08
Q$1955	Q9D8T2	GSDMD_MOUSE	Gsdmdc1	Gasdermin-D	0.959	2.46	1	3793660	999717	2722410	1886668	346046	367034	333227	120085	20.4	82.1	27.4	14.2	-3.8	0.003	-1.4	0.1	-2	0.004	2.7	0.03	1.9	0.1	-1.4	0.1	7e-05
Q$470	Q9QXS1-6	PLEC_MOUSE	Ple	Isoform PLEC-0,1C of Plectin	1	16.47	53	3792367	1993707	3909210	3438960	295942	87380	373691	304065	17.4	9.8	21.4	19.8	-1.9	0.02	1	0.8	-1.1	0.7	2	0.03	1.7	0.03	-1.1	0.7	0.0008
Q$5	P02535-2	K1C10_MOUSE	Krt1	Isoform 2 of Keratin, type I cytoskeletal 10	1	12.83	5	3786313	2356892	5152468	2756570	2115670	1302795	2212261	613560	124.9	123.6	96	49.8	-1.6	1	1.4	1	-1.4	1	2.2	0.9	1.2	1	-1.9	0.9	0.7
Q$1993	Q9EQH3	VPS35_MOUSE	Vps35	Vacuolar protein sorting-associated protein 35	1	6.78	4	3773314	1449001	3175832	2529201	340175	86078	481896	358546	20.2	13.3	33.9	31.7	-2.6	0.01	-1.2	0.5	-1.5	0.1	2.2	0.1	1.7	0.1	-1.3	0.5	0.002
Q$58	P70290	EM55_MOUSE	Mpp1	55 kDa erythrocyte membrane protein	0.9985	4.51	2	3751578	1369128	3703920	3218966	289465	72307	418727	438374	17.3	11.8	25.3	30.5	-2.7	0.005	-1	0.9	-1.2	0.7	2.7	0.02	2.4	0.05	-1.2	0.7	0.0004
Q$1778	Q99JB2	STML2_MOUSE	Stoml2	Stomatin-like protein 2, mitochondrial	1	30.59	7	3747288	1804365	4050774	4142770	407607	84795	242666	630417	24.3	10.5	13.4	34	-2.1	0.04	1.1	0.9	1.1	0.9	2.2	0.0001	2.3	0.08	1	0.9	0.002
Q$526	G5E8F1	G5E8F1_MOUSE	Itgam	Integrin alpha M, isoform CRA_a	1	19.95	15	3716471	2402265	3600482	3450734	192867	84785	209642	218427	11.6	7.9	13	14.2	-1.5	0.001	-1	0.9	-1.1	0.8	1.5	0.004	1.4	0.008	-1	0.9	0.0004
Q$485	E9PZW0	E9PZW0_MOUSE	Dsp	Desmoplakin	1	2.32	3	3706115	1518398	4359997	3892071	432613	208909	692473	642859	26.1	30.8	35.5	36.9	-2.4	0.01	1.2	0.8	1.1	0.9	2.9	0.05	2.6	0.04	-1.1	0.9	0.008
Q$950	P17710-2	HXK1_MOUSE	Hk	Isoform HK1-SB of Hexokinase-1	1	27.2	15	3696963	2048620	3217905	3161792	372332	65037	259687	349326	22.5	7.1	18	24.7	-1.8	0.05	-1.1	0.7	-1.2	0.7	1.6	0.05	1.5	0.1	-1	0.9	0.007
Q$1923	Q9D1D4-2	TMEDA_MOUSE	Tmed1	Isoform 2 of Transmembrane emp24 domain-containing protein 10	1	27.66	3	3695805	2878082	3701793	3748530	196065	426698	338571	156627	11.9	33.2	20.5	9.3	-1.3	0.5	1	1	1	1	1.3	0.5	1.3	0.4	1	1	0.2
Q$1585	Q8BFR5-2	EFTU_MOUSE	Tuf	Isoform 2 of Elongation factor Tu, mitochondrial	1	22.99	8	3695491	1702134	3443036	2966061	259417	75882	264244	276945	15.7	10	17.2	20.9	-2.2	0.006	-1.1	0.5	-1.2	0.2	2	0.009	1.7	0.03	-1.2	0.4	9e-05
Q$109	O08573-2	LEG9_MOUSE	Lgals	Isoform Short of Galectin-9	1	21.74	5	3687171	2411482	3820854	3782653	179962	256232	167711	133190	10.9	23.8	9.8	7.9	-1.5	0.01	1	0.9	1	0.9	1.6	0.009	1.6	0.009	-1	0.9	0.0002
Q$1135	P56382	ATP5E_MOUSE	Atp5e	ATP synthase subunit epsilon, mitochondrial	0.981	13.46	1	3664190	1842710	3635220	3490340	343561	86964	258893	406074	21	10.6	15.9	26	-2	0.02	-1	1	-1	1	2	0.001	1.9	0.05	-1	1	0.001
Q$1431	Q61029-3	LAP2B_MOUSE	Tmp	Isoform Epsilon of Lamina-associated polypeptide 2, isoforms beta/delta/epsilon/gamma	1	28.64	8	3651526	1559482	2875958	2865183	228815	91560	273974	317361	14	13.1	21.3	24.8	-2.3	0.0002	-1.3	0.2	-1.3	0.2	1.8	0.009	1.8	0.05	-1	1	0.0002
Q$1114	P51863	VA0D1_MOUSE	Atp6v0d1	V-type proton ATPase subunit d 1	0.9992	3.13	1	3644920	1812463	3204770	2979660	384781	264393	400068	476495	23.6	32.6	27.9	35.8	-2	0.03	-1.1	0.7	-1.2	0.7	1.8	0.1	1.6	0.2	-1.1	0.7	0.03
Q$122	B1AUX2	B1AUX2_MOUSE	Hcfc1	Host cell factor 1	1	3.44	4	3637662	1208216	3118851	2747128	414143	108509	372843	451882	25.5	20.1	26.7	36.8	-3	0.02	-1.2	0.6	-1.3	0.5	2.6	0.03	2.3	0.1	-1.1	0.6	0.001
Q$1998	Q9ERE2	KRT81_MOUSE	Krt81	Keratin, type II cuticular Hb1	1	17.05	10	3636243	32108796	3634281	11764303	241323	14615552	264838	8768819	14.8	101.8	16.3	166.7	8.8	0.5	-1	1	3.2	0.8	-8.8	0.5	-2.7	0.7	3.2	0.8	0.1
Q$1519	Q6IFZ6	K2C1B_MOUSE	Krt77	Keratin, type II cytoskeletal 1b	1	8.04	3	3629910	1792379	2933246	2602106	572069	382268	280665	338534	35.2	47.7	21.4	29.1	-2	0.2	-1.2	0.5	-1.4	0.5	1.6	0.2	1.5	0.5	-1.1	0.5	0.04
Q$1572	Q80VF6-2	F181B_MOUSE	Fam181	Isoform 2 of Protein FAM181B	0.9982	21.54	2	3627943	3965346	3837797	3841743	89979	214804	133343	191940	5.5	12.1	7.8	11.2	1.1	0.7	1.1	0.7	1.1	0.8	-1	0.9	-1	0.9	1	1	0.6
Q$1137	Q3U4W8	Q3U4W8_MOUSE	Usp5	Ubiquitin carboxyl-terminal hydrolase	1	16.41	6	3610200	1919985	4229447	3707576	335966	111401	390073	421703	20.8	13	20.6	25.4	-1.9	0.008	1.2	0.6	1	0.9	2.2	0.01	1.9	0.04	-1.1	0.6	0.001
Q$676	G3X8R0	G3X8R0_MOUSE	Reep5	Receptor accessory protein 5, isoform CRA_a	1	11.11	2	3596286	1339749	3656540	3201260	329401	45045	301558	300403	20.5	7.5	18.4	21	-2.7	0.01	1	0.9	-1.1	0.7	2.7	0.008	2.4	0.01	-1.1	0.7	4e-05
Q$667	G3UZ48	G3UZ48_MOUSE	Syncrip	Heterogeneous nuclear ribonucleoprotein Q	1	25.65	8	3588316	1538348	3528401	2897240	250716	135584	516434	439515	15.6	19.7	32.7	33.9	-2.3	0.0006	-1	0.9	-1.2	0.5	2.3	0.08	1.9	0.1	-1.2	0.6	0.004
Q$623	Q64324	STXB2_MOUSE	Stxbp2	Syntaxin-binding protein 2	0.9997	11.64	4	3585275	1927722	3600670	3624169	468226	268838	529410	440556	29.2	31.2	32.9	27.2	-1.9	0.07	1	1	1	1	1.9	0.09	1.9	0.06	1	1	0.03
Q$750	M0QWP9	M0QWP9_MOUSE	Ndufv2	NADH dehydrogenase [ubiquinone] flavoprotein 2, mitochondrial (Fragment)	1	40.68	2	3579876	1633417	3698814	3340756	259450	214198	397127	157451	16.2	29.3	24	10.5	-2.2	0.002	1	0.8	-1.1	0.8	2.3	0.007	2	0.001	-1.1	0.8	0.0002
Q$1858	Q9CQS8	SC61B_MOUSE	Sec61b	Protein transport protein Sec61 subunit beta	1	11.46	1	3578570	10214249	3534590	7576420	442257	6043483	191475	3996276	27.6	132.3	12.1	117.9	2.9	0.9	-1	0.9	2.1	0.9	-2.9	0.9	-1.3	0.9	2.1	0.9	0.5
Q$1313	Q02013	AQP1_MOUSE	Aqp1	Aquaporin-1	0.9532	3.35	1	3578350	2486457	6737930	6467120	778285	338279	1197770	399533	48.6	30.4	39.7	13.8	-1.4	0.4	1.9	0.2	1.8	0.05	2.7	0.08	2.6	0.0004	-1	0.8	0.002
Q$1753	Q91Z50	Q91Z50_MOUSE	Fen1	Flap endonuclease 1	1	20.53	5	3577888	2814553	4961278	4350097	124376	251464	614648	190729	7.8	20	27.7	9.8	-1.3	0.08	1.4	0.2	1.2	0.05	1.8	0.05	1.5	0.007	-1.1	0.4	0.003
Q$669	G3UZI2	G3UZI2_MOUSE	Syncrip	Heterogeneous nuclear ribonucleoprotein Q	1	21.63	8	3562082	1518414	3496540	2871958	254655	137239	515488	443666	16	20.2	33	34.5	-2.3	0.0006	-1	0.9	-1.2	0.5	2.3	0.08	1.9	0.1	-1.2	0.6	0.004
Q$1438	Q61093	CY24B_MOUSE	Cybb	Cytochrome b-245 heavy chain	1	13.51	4	3542104	3221672	3852683	4031035	262170	320157	417994	609355	16.6	22.2	24.3	33.8	-1.1	0.9	1.1	0.9	1.1	0.9	1.2	0.8	1.3	0.8	1	0.9	0.6
Q$1345	Q3THE2	ML12B_MOUSE	Myl12b	Myosin regulatory light chain 12B	1	36.05	6	3540778	3014736	3740082	2903213	539809	601265	466743	295437	34.1	44.6	27.9	22.8	-1.2	0.9	1.1	1	-1.2	0.9	1.2	0.9	-1	1	-1.3	0.7	0.6
Q$897	P10922	H10_MOUSE	H1f0	Histone H1.0	1	11.34	2	3527196	6344099	2859866	3658266	417432	2691363	510560	1044740	26.5	94.9	39.9	63.9	1.8	0.9	-1.2	0.9	1	0.9	-2.2	0.8	-1.7	0.9	1.3	0.9	0.4
Q$1382	Q3UN88	Q3UN88_MOUSE	Mcpt4	Mast cell protease 4	1	14.23	3	3527127	1686817	4282946	3557096	384238	159054	546801	466528	24.4	21.1	28.5	29.3	-2.1	0.01	1.2	0.6	1	1	2.5	0.03	2.1	0.03	-1.2	0.6	0.003
Q$585	P68254-2	1433T_MOUSE	Ywha	Isoform 2 of 14-3-3 protein theta	1	47.33	6	3516029	2763027	5015352	3478248	280127	255305	670584	216767	17.8	20.7	29.9	13.9	-1.3	0.3	1.4	0.3	-1	0.9	1.8	0.08	1.3	0.3	-1.4	0.3	0.008
Q$1386	Q3UW66	Q3UW66_MOUSE	Mpst	3-mercaptopyruvate sulfurtransferase	1	22.9	4	3511427	1733039	5166803	3396036	302298	32577	231059	281244	19.3	4.2	10	18.5	-2	0.01	1.5	0.01	-1	0.8	3	0.0006	2	0.01	-1.5	0.006	3e-07
Q$1918	Q9D154	ILEUA_MOUSE	Serpinb1a	Leukocyte elastase inhibitor A	0.9999	10.55	3	3495135	1167852	3482295	3170461	498069	161634	624989	325494	31.9	30.9	40.1	23	-3	0.01	-1	1	-1.1	0.9	3	0.07	2.7	0.003	-1.1	0.9	0.004
Q$733	D3YWJ3	D3YWJ3_MOUSE	Rps2	40S ribosomal protein S2	1	22.53	4	3488326	2138621	3948840	3236100	169674	138792	387194	278226	10.9	14.5	21.9	19.2	-1.6	0.002	1.1	0.5	-1.1	0.5	1.8	0.01	1.5	0.03	-1.2	0.4	0.001
Q$239	D3Z1V4	D3Z1V4_MOUSE	Pebp1	Phosphatidylethanolamine-binding protein 1	1	27.75	3	3479721	2462038	3135381	3006024	125594	211273	267957	371234	8.1	19.2	19.1	27.6	-1.4	0.02	-1.1	0.7	-1.2	0.7	1.3	0.4	1.2	0.7	-1	0.8	0.08
Q$47	A2AKV1	A2AKV1_MOUSE	Atp5c1	ATP synthase subunit gamma, mitochondrial (Fragment)	1	22.08	3	3478777	1455174	6019427	4738822	670463	40160	627233	786867	43.1	6.2	23.3	37.1	-2.4	0.1	1.7	0.09	1.4	0.4	4.1	0.01	3.3	0.07	-1.3	0.4	0.0005
Q$192	D3YX62	D3YX62_MOUSE	Hmox2	Heme oxygenase 2 (Fragment)	1	34.65	5	3471783	1795074	3141850	2708212	321172	51431	320350	194954	20.7	6.4	22.8	16.1	-1.9	0.03	-1.1	0.5	-1.3	0.2	1.8	0.05	1.5	0.04	-1.2	0.5	0.001
Q$1297	P97461	RS5_MOUSE	Rps5	40S ribosomal protein S5	1	36.76	4	3459539	2803160	3915400	3484192	110516	102756	223713	164488	7.1	8.2	12.8	10.6	-1.2	0.01	1.1	0.3	1	0.9	1.4	0.01	1.2	0.03	-1.1	0.3	0.001
Q$1216	P62960	YBOX1_MOUSE	Ybx1	Nuclease-sensitive element-binding protein 1	1	15.84	4	3446772	2407428	4377999	3655945	203704	205661	519610	360155	13.2	19.1	26.5	22	-1.4	0.04	1.3	0.4	1.1	0.6	1.8	0.04	1.5	0.07	-1.2	0.5	0.009
Q$2032	Q9QUM9	PSA6_MOUSE	Psma6	Proteasome subunit alpha type-6	1	32.52	4	3419423	1503100	2995247	2719797	524093	125068	436783	389778	34.3	18.6	32.6	32	-2.3	0.1	-1.1	0.8	-1.3	0.7	2	0.1	1.8	0.1	-1.1	0.8	0.02
Q$1507	Q64522	H2A2B_MOUSE	Hist2h2ab	Histone H2A type 2-B	1	22.31	3	3417360	2911888	4692735	3492488	337068	389962	457332	130520	22.1	29.9	21.8	8.4	-1.2	0.6	1.4	0.2	1	0.8	1.6	0.1	1.2	0.5	-1.3	0.2	0.02
Q$121	B1AU75	B1AU75_MOUSE	Nasp	Nuclear autoantigenic sperm protein	1	18.89	7	3411242	1839687	3357986	3180306	238202	68262	322865	396158	15.6	8.3	21.5	27.9	-1.9	0.01	-1	0.9	-1.1	0.9	1.8	0.04	1.7	0.1	-1.1	0.9	0.003
Q$1429	Q61024	ASNS_MOUSE	Asns	Asparagine synthetase [glutamine-hydrolyzing]	1	5.17	2	3409382	2666722	2681496	2094442	559264	397278	293575	182746	36.7	33.3	24.5	19.5	-1.3	0.6	-1.3	0.6	-1.6	0.3	1	1	-1.3	0.6	-1.3	0.5	0.2
Q$1699	Q8R1V9	Q8R1V9_MOUSE	Qars	Protein Qars	0.9994	5.61	2	3399017	3787790	4346490	4249004	429982	650691	620643	690143	28.3	38.4	31.9	36.3	1.1	1	1.3	0.8	1.3	0.9	1.1	1	1.1	1	-1	1	0.7
Q$529	E9Q6H6	E9Q6H6_MOUSE	Alox5	Arachidonate 5-lipoxygenase	1	13.24	5	3392693	2840124	3810833	3566238	181880	519888	258193	490239	12	40.9	15.1	30.7	-1.2	0.8	1.1	0.7	1.1	0.9	1.3	0.6	1.3	0.8	-1.1	0.9	0.4
Q$165	D3YVE6	D3YVE6_MOUSE	Rpl7a-ps10	MCG18601	1	25.19	6	3389607	1345943	4295812	2957387	353499	134119	995544	377503	23.3	22.3	51.8	28.5	-2.5	0.004	1.3	0.7	-1.1	0.7	3.2	0.2	2.2	0.02	-1.5	0.6	0.01
Q$1100	P49718	MCM5_MOUSE	Mcm5	DNA replication licensing factor MCM5	1	13.37	6	3377436	2394147	3253948	3336959	86209	123950	162322	305375	5.7	11.6	11.2	20.5	-1.4	0.001	-1	0.9	-1	1	1.4	0.01	1.4	0.08	1	1	0.006
Q$36	A2AFQ2	A2AFQ2_MOUSE	Hsd17b10	3-hydroxyacyl-CoA dehydrogenase type-2	1	40.22	6	3369970	2108328	2888072	2665067	790762	198644	261556	213055	52.5	21.1	20.3	17.9	-1.6	0.6	-1.2	0.8	-1.3	0.8	1.4	0.2	1.3	0.4	-1.1	0.8	0.3
Q$1995	Q9EQI8	RM46_MOUSE	Mrpl46	39S ribosomal protein L46, mitochondrial	1	12.01	2	3362428	2385602	3198285	3487378	350090	246548	244591	357172	23.3	23.1	17.1	22.9	-1.4	0.2	-1.1	0.9	1	0.9	1.3	0.2	1.5	0.2	1.1	0.9	0.08
Q$1218	P62983	RS27A_MOUSE	Rps27a	Ubiquitin-40S ribosomal protein S27a	1	32.69	4	3356762	2405688	3251474	2940808	147211	232490	219175	117471	9.8	21.6	15.1	8.9	-1.4	0.05	-1	0.7	-1.1	0.2	1.4	0.1	1.2	0.2	-1.1	0.4	0.01
Q$1097	P49615	CDK5_MOUSE	Cdk5	Cyclin-dependent kinase 5	0.9872	6.85	1	3340610	1049215	3396620	3097500	334783	225542	254858	296631	22.4	48.1	16.8	21.4	-3.2	0.002	1	0.9	-1.1	0.8	3.2	0.0007	3	0.002	-1.1	0.8	5e-05
Q$177	D3YWJ3	D3YWJ3_MOUSE	Rps2	40S ribosomal protein S2	1	25.17	5	3336202	2247668	3779893	3029621	103664	106184	331177	171648	6.9	10.6	19.6	12.7	-1.5	0.0005	1.1	0.3	-1.1	0.3	1.7	0.03	1.3	0.02	-1.2	0.2	0.0005
Q$1983	Q9DCJ5	NDUA8_MOUSE	Ndufa8	NADH dehydrogenase [ubiquinone] 1 alpha subcomplex subunit 8	1	32.56	4	3331063	3506447	4085778	3795245	649804	606174	392453	463752	43.6	38.7	21.5	27.3	1.1	1	1.2	0.9	1.1	1	1.2	0.9	1.1	1	-1.1	1	0.8
Q$1238	P63325	RS10_MOUSE	Rps10	40S ribosomal protein S10	1	18.18	2	3327459	2888006	3291171	2863614	236037	155713	198024	273256	15.9	12.1	13.5	21.3	-1.2	0.6	-1	1	-1.2	0.7	1.1	0.6	-1	1	-1.1	0.7	0.3
Q$1815	Q99M87-2	DNJA3_MOUSE	Dnaja	Isoform 2 of DnaJ homolog subfamily A member 3, mitochondrial	0.9626	2.65	1	3319867	3157303	3732400	3441010	72157	348752	687880	568288	4.9	24.7	41.2	36.9	-1.1	1	1.1	1	1	1	1.2	1	1.1	1	-1.1	1	0.9
Q$1512	Q69ZN7	MYOF_MOUSE	Myof	Myoferlin	1	6.01	9	3309419	1687092	3101363	2585919	317763	90797	362672	213384	21.5	12	26.1	18.5	-2	0.03	-1.1	0.7	-1.3	0.3	1.8	0.06	1.5	0.03	-1.2	0.4	0.003
Q$74	A2AUR7	A2AUR7_MOUSE	Rsu1	Ras suppressor protein 1	1	13.46	3	3308332	1632554	2625342	1860566	403834	359844	252803	142633	27.3	49.3	21.5	17.1	-2	0.07	-1.3	0.3	-1.8	0.06	1.6	0.2	1.1	0.6	-1.4	0.1	0.005
Q$1591	Q8BGD9	IF4B_MOUSE	Eif4b	Eukaryotic translation initiation factor 4B	0.9992	6.71	2	3304958	2674590	3085704	2816573	461372	278884	489358	441078	31.2	23.3	35.5	35	-1.2	0.9	-1.1	1	-1.2	1	1.2	1	1.1	1	-1.1	1	0.7
Q$1695	Q8R0W0	EPIPL_MOUSE	Eppk1	Epiplakin	1	0.29	1	3291440	1652249	2305640	2077867	201598	189658	434926	329684	13.7	25.7	42.2	35.5	-2	0.002	-1.4	0.3	-1.6	0.07	1.4	0.5	1.3	0.5	-1.1	0.7	0.01
Q$1615	Q8BKC5-2	IPO5_MOUSE	Ipo	Isoform 2 of Importin-5	1	10.03	6	3286559	2258344	3518208	3496513	314667	109851	421619	307753	21.4	10.9	26.8	19.7	-1.5	0.07	1.1	1	1.1	1	1.6	0.1	1.5	0.03	-1	1	0.03
Q$639	G3UVV3	G3UVV3_MOUSE	Zfp407	MCG1556, isoform CRA_b	0.9468	1.56	1	3280620	1538090	3010960	2696590	130262	162026	374977	337241	8.9	23.6	27.8	28	-2.1	0.0002	-1.1	0.8	-1.2	0.4	2	0.03	1.8	0.06	-1.1	0.8	0.002
Q$1932	Q9D2G2-2	ODO2_MOUSE	Dls	Isoform 2 of Dihydrolipoyllysine-residue succinyltransferase component of 2-oxoglutarate dehydrogenase complex, mitochondrial	1	14.43	2	3280505	2794449	3446199	3035372	181751	60388	514647	322701	12.4	4.8	33.4	23.8	-1.2	0.2	1.1	0.9	-1.1	0.9	1.2	0.8	1.1	0.9	-1.1	0.9	0.5
Q$138	B2RY56	RBM25_MOUSE	Rbm25	RNA-binding protein 25	0.9999	4.06	2	3277008	1257484	3934328	2560789	515922	166468	962129	517155	35.2	29.6	54.7	45.2	-2.6	0.08	1.2	0.6	-1.3	0.6	3.1	0.2	2	0.2	-1.5	0.6	0.04
Q$1546	Q6ZWM4	NAA38_MOUSE	Naa38	N-alpha-acetyltransferase 38, NatC auxiliary subunit	0.9998	61.46	3	3275499	1805243	3069340	2938408	233804	148854	369622	148757	16	18.4	26.9	11.3	-1.8	0.004	-1.1	0.9	-1.1	0.6	1.7	0.05	1.6	0.004	-1	0.9	0.003
Q$133	B7ZN27	B7ZN27_MOUSE	Cad	Cad protein	1	6.5	9	3274390	2051109	3513620	3049972	142870	40523	271598	203630	9.8	4.4	17.3	14.9	-1.6	0.004	1.1	0.6	-1.1	0.6	1.7	0.03	1.5	0.03	-1.2	0.5	0.0002
Q$2040	Q9QYA2	TOM40_MOUSE	Tomm40	Mitochondrial import receptor subunit TOM40 homolog	1	19.94	4	3254166	2503168	3227846	3204827	212517	72794	218815	204135	14.6	6.5	15.2	14.2	-1.3	0.06	-1	1	-1	1	1.3	0.06	1.3	0.06	-1	1	0.03
Q$1387	Q3UZ39	LRRF1_MOUSE	Lrrfip1	Leucine-rich repeat flightless-interacting protein 1	0.9989	6.04	2	3252765	1243819	3121454	2562279	395168	130614	528243	447691	27.2	23.5	37.8	39.1	-2.6	0.008	-1	0.8	-1.3	0.6	2.5	0.1	2.1	0.1	-1.2	0.7	0.01
Q$556	E9QMV2	E9QMV2_MOUSE	Abracl	Costars family protein ABRACL	1	27.16	3	3229738	1210565	2555010	2190250	119325	155257	312087	362383	8.3	28.7	27.3	37	-2.7	4e-05	-1.3	0.2	-1.5	0.1	2.1	0.02	1.8	0.1	-1.2	0.5	0.0004
Q$1745	Q91X78	ERLN1_MOUSE	Erlin1	Erlin-1	0.9999	9.25	2	3228047	3583390	2849424	2920776	235353	375706	220814	282672	16.3	23.4	17.3	21.6	1.1	0.8	-1.1	0.7	-1.1	0.8	-1.3	0.6	-1.2	0.7	1	0.8	0.3
Q$1501	Q64337-2	SQSTM_MOUSE	Sqstm	Isoform 2 of Sequestosome-1	1	15.35	4	3227916	1952173	3397789	2975705	237267	77258	450390	437187	16.4	8.8	29.6	32.9	-1.7	0.005	1.1	0.9	-1.1	0.9	1.7	0.1	1.5	0.3	-1.1	0.9	0.03
Q$1500	Q64310	SURF4_MOUSE	Surf4	Surfeit locus protein 4	1	10.41	2	3216507	1109463	2734632	2616632	271498	94969	359976	216566	18.9	19.1	29.4	18.5	-2.9	0.0005	-1.2	0.5	-1.2	0.3	2.5	0.04	2.4	0.001	-1	0.8	0.0002
Q$1921	Q9D1B9	RM28_MOUSE	Mrpl28	39S ribosomal protein L28, mitochondrial	0.9342	6.61	1	3213110	2650430	3388460	3599920	307163	262946	334468	503064	21.4	22.2	22.1	31.2	-1.2	0.6	1.1	0.9	1.1	0.9	1.3	0.5	1.4	0.5	1.1	0.9	0.3
Q$684	G3X9V0	G3X9V0_MOUSE	Psme2	MCG22048, isoform CRA_a	0.9999	30.3	5	3209261	2181892	3402313	3148688	315673	77849	264172	270283	22	8	17.4	19.2	-1.5	0.1	1.1	0.9	-1	0.9	1.6	0.05	1.4	0.1	-1.1	0.9	0.01
Q$2036	Q9QXS1-15	PLEC_MOUSE	Ple	Isoform PLEC-1H of Plectin	1	16.25	51	3209033	1831997	3246153	2928414	192076	80551	213862	211219	13.4	9.8	14.7	16.1	-1.8	0.001	1	0.9	-1.1	0.7	1.8	0.001	1.6	0.005	-1.1	0.7	0.0001
Q$1837	Q9CPY7-2	AMPL_MOUSE	Lap	Isoform 2 of Cytosol aminopeptidase	1	23.77	7	3207039	1694854	3082237	2781906	289266	71641	265248	201045	20.2	9.5	19.2	16.2	-1.9	0.02	-1	0.8	-1.2	0.6	1.8	0.02	1.6	0.006	-1.1	0.6	0.0008
Q$971	P20491	FCERG_MOUSE	Fcer1g	High affinity immunoglobulin epsilon receptor subunit gamma	1	30.23	3	3196476	1220363	2462095	2553325	315230	66757	308817	223663	22.1	12.2	28	19.6	-2.6	0.02	-1.3	0.4	-1.3	0.4	2	0.06	2.1	0.02	1	0.8	0.0004
Q$1658	Q8CDN6	TXNL1_MOUSE	Txnl1	Thioredoxin-like protein 1	1	18.69	3	3191455	2088534	3329504	3207986	201693	88196	244246	232466	14.1	9.4	16.4	16.2	-1.5	0.006	1	1	1	1	1.6	0.007	1.5	0.008	-1	1	0.001
Q$1332	Q8R050-2	ERF3A_MOUSE	Gspt	Isoform 2 of Eukaryotic peptide chain release factor GTP-binding subunit ERF3A	0.996	5.35	2	3190893	1839220	3579578	1552162	1964480	1111814	1879382	371221	137.7	135.2	117.4	53.5	-1.7	0.9	1.1	1	-2.1	0.9	1.9	0.9	-1.2	1	-2.3	0.9	0.7
Q$809	O70435	PSA3_MOUSE	Psma3	Proteasome subunit alpha type-3	0.9922	3.53	1	3183390	1246994	3442700	3102647	438129	266646	601281	711998	30.8	47.8	39.1	51.3	-2.6	0.03	1.1	1	-1	1	2.8	0.05	2.5	0.2	-1.1	1	0.04
Q$179	D3YVH7	D3YVH7_MOUSE	Pa2g4	Proliferation-associated protein 2G4 (Fragment)	1	37.45	8	3182673	1859300	3463618	3080256	209141	158380	251565	345901	14.7	19	16.2	25.1	-1.7	0.005	1.1	0.8	-1	0.8	1.9	0.004	1.7	0.05	-1.1	0.8	0.002
Q$513	E9Q3W4	E9Q3W4_MOUSE	Plec	Plectin	1	16.21	50	3181380	1814914	3214018	2898036	194337	79307	210178	206891	13.7	9.8	14.6	16	-1.8	0.001	1	0.9	-1.1	0.7	1.8	0.001	1.6	0.005	-1.1	0.7	0.0001
Q$1358	Q3TXS7	PSMD1_MOUSE	Psmd1	26S proteasome non-ATPase regulatory subunit 1	0.9998	2.41	2	3176649	2189508	3175912	2962167	226987	133270	286233	402397	16	13.6	20.2	30.4	-1.5	0.03	-1	1	-1.1	1	1.5	0.07	1.4	0.4	-1.1	1	0.07
Q$451	E9PV04	E9PV04_MOUSE	Gm8994	Protein Gm8994	1	2.43	1	3172605	1692628	3552135	3009115	340769	541088	629994	412736	24	71.5	39.7	30.7	-1.9	0.3	1.1	0.9	-1.1	0.9	2.1	0.3	1.8	0.3	-1.2	0.9	0.08
Q$1559	Q792Y8	Q792Y8_MOUSE	Gm10334	MCG15081	0.9996	4.07	1	3170550	3349633	3234700	3174733	64898	121148	46188	65829	4.6	8.1	3.2	4.6	1.1	0.8	1	0.9	1	1	-1	0.9	-1.1	0.8	-1	0.9	0.4
Q$1169	P61924	COPZ1_MOUSE	Copz1	Coatomer subunit zeta-1	1	18.64	1	3168780	2845460	3948820	3925210	373051	410877	230027	485518	26.3	32.3	13	27.7	-1.1	0.8	1.2	0.5	1.2	0.6	1.4	0.3	1.4	0.5	-1	1	0.1
Q$900	P11087-2	CO1A1_MOUSE	Col1a	Isoform 2 of Collagen alpha-1(I) chain	0.9984	14.04	4	3155856	27546109	16340350	13323355	222283	11897880	9976750	9076116	15.7	96.6	136.5	152.3	8.7	0.5	5.2	0.8	4.2	0.8	-1.7	0.8	-2.1	0.8	-1.2	0.8	0.3
Q$1432	Q61033	LAP2A_MOUSE	Tmpo	Lamina-associated polypeptide 2, isoforms alpha/zeta	1	15.15	7	3153202	1447548	2527096	2580647	271249	81453	215150	277964	19.2	12.6	19	24.1	-2.2	0.01	-1.2	0.3	-1.2	0.3	1.7	0.009	1.8	0.05	1	0.9	0.0006
Q$2100	Q9Z1Z2	STRAP_MOUSE	Strap	Serine-threonine kinase receptor-associated protein	1	14.57	3	3152012	1994726	3013447	2918915	123265	66631	354432	128183	8.7	7.5	26.3	9.8	-1.6	0.0002	-1	0.9	-1.1	0.5	1.5	0.2	1.5	0.001	-1	0.9	0.004
Q$489	Q99J93	IFM2_MOUSE	Ifitm2	Interferon-induced transmembrane protein 2	1	5.56	1	3139410	1868430	2998610	3345743	197096	206483	236525	372862	14	24.7	17.6	24.9	-1.7	0.01	-1	0.9	1.1	0.9	1.6	0.03	1.8	0.03	1.1	0.8	0.005
Q$1816	Q99MD9-2	NASP_MOUSE	Nas	Isoform 2 of Nuclear autoantigenic sperm protein	1	25.18	5	3133924	1639478	3119954	2975293	221314	63719	316366	373109	15.8	8.7	22.7	28	-1.9	0.01	-1	1	-1.1	1	1.9	0.04	1.8	0.09	-1	1	0.003
Q$1393	Q501J6-2	DDX17_MOUSE	Ddx1	Isoform 2 of Probable ATP-dependent RNA helicase DDX17	1	17.44	6	3129232	1276991	3036804	2685246	347759	20164	318868	399406	24.8	3.5	23.5	33.3	-2.5	0.03	-1	0.8	-1.2	0.8	2.4	0.03	2.1	0.09	-1.1	0.8	0.002
Q$1477	Q9D8L3	Q9D8L3_MOUSE	Ssr4	Signal sequence receptor, delta	1	30.64	4	3106399	1700523	3285680	2985240	266800	75395	394112	344468	19.2	9.9	26.8	25.8	-1.8	0.03	1.1	0.9	-1	0.9	1.9	0.07	1.8	0.07	-1.1	0.9	0.006
Q$1711	Q8VC28	AK1CD_MOUSE	Akr1c13	Aldo-keto reductase family 1 member C13	1	22.91	4	3104505	1869514	2836622	2972853	207713	94137	264395	281626	15	11.3	20.8	21.2	-1.7	0.004	-1.1	0.8	-1	0.9	1.5	0.03	1.6	0.03	1	0.9	0.005
Q$1772	Q923D2	BLVRB_MOUSE	Blvrb	Flavin reductase (NADPH)	1	63.59	8	3101210	1814771	4015221	3347998	228921	105427	450949	359165	16.5	13	25.1	24	-1.7	0.006	1.3	0.3	1.1	0.6	2.2	0.03	1.8	0.04	-1.2	0.5	0.001
Q$802	O70133-3	DHX9_MOUSE	Dhx	Isoform 3 of ATP-dependent RNA helicase A	1	10.4	10	3096165	1631851	2918325	2772834	265309	134298	320892	310342	19.2	18.4	24.6	25	-1.9	0.007	-1.1	0.9	-1.1	0.8	1.8	0.03	1.7	0.04	-1.1	0.9	0.006
Q$1893	Q9CYH6	RRS1_MOUSE	Rrs1	Ribosome biogenesis regulatory protein homolog	0.96	3.29	1	3091910	723679	2752120	3589580	243435	143158	432323	817199	17.6	44.2	35.1	50.9	-4.3	0.0002	-1.1	0.8	1.2	0.8	3.8	0.01	5	0.09	1.3	0.8	0.004
Q$2049	Q9QZM0	UBQL2_MOUSE	Ubqln2	Ubiquilin-2	0.9998	4.86	2	3084397	3114066	2622617	2389754	379958	1561738	299128	323250	27.5	112.1	25.5	30.2	1	1	-1.2	0.9	-1.3	0.7	-1.2	1	-1.3	1	-1.1	1	0.9
Q$276	D3Z7C6	D3Z7C6_MOUSE	Ptges3	Prostaglandin E synthase 3	1	24.62	3	3078674	1912884	3098946	3025693	217185	154676	323604	429869	15.8	18.1	23.3	31.8	-1.6	0.01	1	1	-1	1	1.6	0.05	1.6	0.2	-1	1	0.03
Q$81	Q9EQU5-2	SET_MOUSE	Se	Isoform 2 of Protein SET	1	24.91	6	3057352	1783385	3003475	2844484	334953	190978	346622	379626	24.5	23.9	25.8	29.8	-1.7	0.06	-1	1	-1.1	1	1.7	0.07	1.6	0.1	-1.1	1	0.04
Q$945	P17426-2	AP2A1_MOUSE	Ap2a	Isoform B of AP-2 complex subunit alpha-1	1	5.13	3	3053303	1077418	3224131	2612312	466698	132002	365537	475987	34.2	27.4	25.4	40.7	-2.8	0.05	1.1	0.8	-1.2	0.8	3	0.003	2.4	0.1	-1.2	0.7	0.005
Q$691	G5E866	G5E866_MOUSE	Sf3b1	Splicing factor 3B subunit 1	1	7.59	6	3041174	1714456	3342124	3257194	163627	172599	289307	495138	12	22.5	19.4	34	-1.8	0.003	1.1	0.8	1.1	0.9	1.9	0.006	1.9	0.07	-1	0.9	0.006
Q$500	P25444	RS2_MOUSE	Rps2	40S ribosomal protein S2	1	19.85	4	3040243	1880865	3403506	2678884	112971	112182	318839	167533	8.3	13.3	20.9	14	-1.6	0.0005	1.1	0.3	-1.1	0.2	1.8	0.01	1.4	0.02	-1.3	0.2	0.0004
Q$1862	Q9CQX2	CYB5B_MOUSE	Cyb5b	Cytochrome b5 type B	1	33.56	3	3034744	1721396	2849021	2616001	213892	304138	365045	249414	15.8	39.5	28.7	21.3	-1.8	0.05	-1.1	0.8	-1.2	0.6	1.7	0.2	1.5	0.2	-1.1	0.8	0.03
Q$2066	Q9WTM5	RUVB2_MOUSE	Ruvbl2	RuvB-like 2	0.9998	4.54	2	3023703	1385937	2737159	2228835	171235	72413	474412	175419	12.7	11.7	38.8	17.6	-2.2	0.0001	-1.1	0.6	-1.4	0.05	2	0.1	1.6	0.01	-1.2	0.6	0.003
Q$1517	Q6GT24	Q6GT24_MOUSE	Prdx6	Peroxiredoxin 6	1	35.71	5	3018511	1782330	3013052	2737375	162950	99102	202897	193582	12.1	12.4	15.1	15.8	-1.7	0.001	-1	1	-1.1	0.7	1.7	0.003	1.5	0.009	-1.1	0.7	0.0002
Q$730	P49312	ROA1_MOUSE	Hnrnpa1	Heterogeneous nuclear ribonucleoprotein A1	1	21.56	7	3010484	1591184	2395581	2055856	101459	100295	150595	209159	7.5	14.1	14.1	22.7	-1.9	5e-05	-1.3	0.03	-1.5	0.01	1.5	0.01	1.3	0.2	-1.2	0.2	4e-05
Q$990	P25911-2	LYN_MOUSE	Ly	Isoform 2 of Tyrosine-protein kinase Lyn	0.9998	11	4	3005886	1592493	3458626	2656233	150168	246425	300061	228073	11.2	34.6	19.4	19.2	-1.9	0.007	1.2	0.4	-1.1	0.4	2.2	0.007	1.7	0.05	-1.3	0.2	0.0003
Q$520	E9QNP0	E9QNP0_MOUSE	Kxd1	KxDL motif-containing protein 1	1	16.38	3	2995694	2170574	2877055	2581743	157473	230634	197389	99540	11.8	23.8	15.3	8.6	-1.4	0.1	-1	0.7	-1.2	0.2	1.3	0.2	1.2	0.4	-1.1	0.4	0.02
Q$682	G3X9Q0	G3X9Q0_MOUSE	Mbnl1	Muscleblind-like 1 (Drosophila), isoform CRA_a	0.9998	20.21	4	2995663	2482206	3060961	2714634	155789	37754	274797	190644	11.6	3.4	20.1	15.7	-1.2	0.2	1	0.8	-1.1	0.7	1.2	0.4	1.1	0.7	-1.1	0.7	0.1
Q$153	B9EJ86	B9EJ86_MOUSE	Osbpl8	Oxysterol-binding protein	1	9.79	6	2993560	1812034	3168017	3039874	245968	62070	368616	256681	18.4	7.7	26	18.9	-1.7	0.04	1.1	1	1	1	1.7	0.08	1.7	0.04	-1	1	0.006
Q$2111	Q9Z2W0	DNPEP_MOUSE	Dnpep	Aspartyl aminopeptidase	1	14.8	3	2980354	1606204	3396698	3019593	174312	218744	608808	461079	13.1	30.5	40.1	34.1	-1.9	0.007	1.1	0.9	1	0.9	2.1	0.1	1.9	0.1	-1.1	0.9	0.03
Q$937	P16381	DDX3L_MOUSE	D1Pas1	Putative ATP-dependent RNA helicase Pl10	1	15.91	8	2978639	1948566	2770050	2518447	211960	90898	178311	248583	15.9	10.4	14.4	22.1	-1.5	0.01	-1.1	0.7	-1.2	0.5	1.4	0.02	1.3	0.2	-1.1	0.7	0.009
Q$1895	Q9CYL5	GAPR1_MOUSE	Glipr2	Golgi-associated plant pathogenesis-related protein 1	1	31.17	3	2978239	1388775	3160738	2702440	338876	61519	413222	454835	25.4	9.9	29.2	37.6	-2.1	0.05	1.1	0.9	-1.1	0.9	2.3	0.06	1.9	0.2	-1.2	0.9	0.01
Q$665	P62858	RS28_MOUSE	Rps28	40S ribosomal protein S28	1	28.99	2	2954427	1244156	2910721	2761984	78177	124553	318829	244373	5.9	22.4	24.5	19.8	-2.4	2e-05	-1	0.9	-1.1	0.9	2.3	0.005	2.2	0.003	-1.1	0.9	7e-05
Q$2116	S4R1F2	S4R1F2_MOUSE	Anxa4	Annexin	1	48.98	6	2950961	1372200	3021875	2551972	275722	72798	228394	196858	20.9	11.9	16.9	17.2	-2.2	0.01	1	0.8	-1.2	0.5	2.2	0.006	1.9	0.003	-1.2	0.4	0.0001
Q$1683	Q8K310	MATR3_MOUSE	Matr3	Matrin-3	1	12.65	7	2945599	2141918	3174481	2805571	214276	68592	342864	231480	16.3	7.2	24.2	18.4	-1.4	0.1	1.1	0.8	-1	0.8	1.5	0.2	1.3	0.2	-1.1	0.8	0.04
Q$174	D3YUT9	D3YUT9_MOUSE	S100a4	Protein S100-A4	0.9997	41.58	1	2935080	2375335	3470580	2968085	327096	225277	202339	377224	24.9	21.2	13	28.4	-1.2	0.7	1.2	0.7	1	0.9	1.5	0.04	1.2	0.7	-1.2	0.7	0.1
Q$1458	Q61686	CBX5_MOUSE	Cbx5	Chromobox protein homolog 5	1	18.85	4	2930901	2068031	3656749	3191702	277205	575405	458042	416734	21.1	62.2	28	29.2	-1.4	0.6	1.2	0.6	1.1	0.7	1.8	0.3	1.5	0.6	-1.1	0.7	0.1
Q$1465	Q61820	RANT_MOUSE	Rasl2-9	GTP-binding nuclear protein Ran, testis-specific isoform	1	5.09	1	2918527	1059953	2189273	1850090	90342	134357	248402	236541	6.9	28.3	25.4	28.6	-2.8	2e-05	-1.3	0.06	-1.6	0.01	2.1	0.02	1.7	0.06	-1.2	0.4	4e-05
Q$711	Q1HFZ0-2	NSUN2_MOUSE	Nsun	Isoform 2 of tRNA (cytosine(34)-C(5))-methyltransferase	1	11.14	5	2907990	1498029	2781887	2472891	419349	58665	355490	248032	32.2	8.8	28.6	22.4	-1.9	0.1	-1	0.8	-1.2	0.8	1.9	0.1	1.7	0.09	-1.1	0.8	0.02
Q$1283	P97311	MCM6_MOUSE	Mcm6	DNA replication licensing factor MCM6	1	9.38	7	2907672	2252041	2944020	2674701	158287	51254	216265	136158	12.2	5.1	16.4	11.4	-1.3	0.03	1	0.9	-1.1	0.7	1.3	0.1	1.2	0.09	-1.1	0.7	0.02
Q$641	P51410	RL9_MOUSE	Rpl9	60S ribosomal protein L9	1	55.21	7	2901475	1519973	2856976	2654584	303377	136578	443539	203506	23.4	20.1	34.7	17.1	-1.9	0.02	-1	0.9	-1.1	0.9	1.9	0.1	1.7	0.01	-1.1	0.9	0.01
Q$778	Q9D8S5	Q9D8S5_MOUSE	Srsf5	MCG7614, isoform CRA_c	1	7.78	2	2893607	1772257	3217815	2889513	132373	182039	276898	263663	10.2	23	19.2	20.4	-1.6	0.006	1.1	0.7	-1	1	1.8	0.01	1.6	0.03	-1.1	0.7	0.002
Q$1870	Q9CR98	F136A_MOUSE	Fam136a	Protein FAM136A	0.9999	23.19	2	2886971	1705729	3296854	3040598	242539	149969	362538	313538	18.8	19.7	24.6	23.1	-1.7	0.02	1.1	0.8	1.1	0.8	1.9	0.02	1.8	0.02	-1.1	0.8	0.005
Q$1793	Q99KJ6	Q99KJ6_MOUSE	Gusb	Beta-glucuronidase	1	8.4	2	2884580	1279431	3052086	2566205	343833	56218	311256	354404	26.7	9.8	22.8	30.9	-2.3	0.04	1.1	0.8	-1.1	0.8	2.4	0.02	2	0.08	-1.2	0.7	0.002
Q$2068	Q9WTP7	KAD3_MOUSE	Ak3	GTP:AMP phosphotransferase AK3, mitochondrial	1	18.5	2	2880017	1586976	3452337	2970241	443335	186540	434414	298813	34.4	26.3	28.1	22.5	-1.8	0.1	1.2	0.8	1	0.9	2.2	0.03	1.9	0.03	-1.2	0.8	0.01
Q$1756	Q91ZW3	SMCA5_MOUSE	Smarca5	SWI/SNF-related matrix-associated actin-dependent regulator of chromatin subfamily A member 5	1	5.04	4	2878734	1530946	3026494	2518958	147183	95712	277670	188252	11.4	14	20.5	16.7	-1.9	0.0004	1.1	0.7	-1.1	0.4	2	0.005	1.6	0.006	-1.2	0.4	0.0002
Q$796	O54962	BAF_MOUSE	Banf1	Barrier-to-autointegration factor	1	44.94	3	2877928	1374264	2740896	2540400	277204	118803	391438	281962	21.5	19.3	31.9	24.8	-2.1	0.006	-1	0.9	-1.1	0.8	2	0.09	1.8	0.03	-1.1	0.9	0.007
Q$1875	Q9CVB6	ARPC2_MOUSE	Arpc2	Actin-related protein 2/3 complex subunit 2	1	24	6	2875816	1328423	2527773	2381036	252145	87792	197680	299371	19.6	14.8	17.5	28.1	-2.2	0.002	-1.1	0.6	-1.2	0.6	1.9	0.003	1.8	0.08	-1.1	0.7	0.001
Q$1608	Q8BJS4-2	SUN2_MOUSE	Sun	Isoform 2 of SUN domain-containing protein 2	1	13.31	7	2867537	1537551	2730445	2559016	164142	131312	337885	206298	12.8	19.1	27.7	18	-1.9	0.001	-1.1	0.9	-1.1	0.6	1.8	0.04	1.7	0.02	-1.1	0.9	0.003
Q$1627	Q8BSL7	ARF2_MOUSE	Arf2	ADP-ribosylation factor 2	1	12.15	2	2849413	977331	1856811	1565674	154038	62922	241260	216056	12.1	14.4	29.1	30.9	-2.9	2e-05	-1.5	0.03	-1.8	0.006	1.9	0.06	1.6	0.1	-1.2	0.4	2e-05
Q$1448	Q61263	SOAT1_MOUSE	Soat1	Sterol O-acyltransferase 1	0.9165	2.78	1	2822470	1385258	2347790	2328190	116569	116985	311153	264904	9.2	18.9	29.6	25.4	-2	0.0001	-1.2	0.3	-1.2	0.3	1.7	0.08	1.7	0.06	-1	1	0.002
Q$1607	Q8BJ71	NUP93_MOUSE	Nup93	Nuclear pore complex protein Nup93	0.9298	1.34	1	2818940	2264870	2798110	2743280	72610	169137	97347	115032	5.8	16.7	7.8	9.4	-1.2	0.1	-1	0.9	-1	0.9	1.2	0.1	1.2	0.2	-1	0.9	0.01
Q$981	P23492	PNPH_MOUSE	Pnp	Purine nucleoside phosphorylase	1	35.29	6	2815422	1575879	2696237	2309379	279446	85106	247795	231251	22.2	12.1	20.6	22.4	-1.8	0.05	-1	0.8	-1.2	0.5	1.7	0.02	1.5	0.07	-1.2	0.5	0.005
Q$1430	Q61029-2	LAP2B_MOUSE	Tmp	Isoform Delta of Lamina-associated polypeptide 2, isoforms beta/delta/epsilon/gamma	1	28.16	7	2805121	1376398	2325197	2401262	176405	84058	179697	216651	14.1	13.7	17.3	20.2	-2	0.0005	-1.2	0.3	-1.2	0.3	1.7	0.007	1.7	0.009	1	0.8	0.0002
Q$1747	Q91Y97	ALDOB_MOUSE	Aldob	Fructose-bisphosphate aldolase B	1	3.57	1	2801480	924094	3081060	2644300	547717	114306	505808	746614	43.7	27.7	36.7	63.1	-3	0.1	1.1	1	-1.1	1	3.3	0.07	2.9	0.3	-1.2	1	0.04
Q$291	D6RE43	D6RE43_MOUSE	Rpl10a	60S ribosomal protein L10a	1	36.21	2	2801165	1367435	2843784	3001071	242332	64683	312046	696106	19.3	10.6	24.5	51.9	-2	0.02	1	1	1.1	1	2.1	0.04	2.2	0.3	1.1	1	0.04
Q$740	J3QNN8	J3QNN8_MOUSE	Gm10263	MCG49140	1	13.04	1	2799743	1135207	2604763	2374290	63744	129176	255260	205979	5.1	25.4	21.9	19.4	-2.5	2e-05	-1.1	0.7	-1.2	0.3	2.3	0.004	2.1	0.004	-1.1	0.7	3e-05
Q$1	A1BN54	A1BN54_MOUSE	Actn1	Alpha actinin 1a	1	9.58	6	2792840	1627410	2665629	2317938	225236	113910	305462	209547	18	15.7	25.6	20.2	-1.7	0.01	-1	0.7	-1.2	0.4	1.6	0.06	1.4	0.08	-1.2	0.6	0.009
Q$1690	Q8QZS1	HIBCH_MOUSE	Hibch	3-hydroxyisobutyryl-CoA hydrolase, mitochondrial	0.9997	11.69	3	2786325	1862909	2854827	2531208	324558	111803	344670	255802	26	13.4	27	22.6	-1.5	0.1	1	0.9	-1.1	0.9	1.5	0.1	1.4	0.2	-1.1	0.9	0.08
Q$1351	Q3TMX5	Q3TMX5_MOUSE	Manf	Arginine-rich, mutated in early stage tumors, isoform CRA_b	1	32.4	6	2783904	603993	1974415	1488723	364796	76259	312405	353949	29.3	28.2	35.4	53.2	-4.6	0.02	-1.4	0.2	-1.9	0.1	3.3	0.05	2.5	0.2	-1.3	0.3	0.0009
Q$1317	Q02844	TRYB1_MOUSE	Tpsab1	Tryptase	1	15.75	2	2766736	1736196	2499098	2043863	192590	241983	271733	113509	15.6	31.2	24.3	12.4	-1.6	0.06	-1.1	0.5	-1.4	0.06	1.4	0.2	1.2	0.5	-1.2	0.4	0.02
Q$51	A2AL85	A2AL85_MOUSE	Asph	Aspartyl/asparaginyl beta-hydroxylase	1	15.03	5	2764190	1277640	2589972	2164546	79280	125897	274893	259334	6.4	22	23.7	26.8	-2.2	5e-05	-1.1	0.6	-1.3	0.2	2	0.01	1.7	0.06	-1.2	0.5	0.0004
Q$848	P03991	HA1W_MOUSE	H2-K1	H-2 class I histocompatibility antigen, K-W28 alpha chain	1	10.05	3	2752487	1440268	2593031	2207752	208189	97766	92464	288012	16.9	15.2	8	29.2	-1.9	0.002	-1.1	0.5	-1.2	0.4	1.8	0.0002	1.5	0.1	-1.2	0.5	0.0008
Q$1642	Q8C181-2	MBNL2_MOUSE	Mbnl	Isoform 2 of Muscleblind-like protein 2	0.9998	12.39	3	2750396	2294589	2744441	2463934	114147	43250	225317	185313	9.3	4.2	18.4	16.8	-1.2	0.03	-1	1	-1.1	0.6	1.2	0.5	1.1	0.7	-1.1	0.7	0.2
Q$447	E9PUM4	E9PUM4_MOUSE	Tln2	Talin-2	1	1.61	4	2739805	1291859	2569837	1878852	643956	594355	576077	289444	52.6	102.9	50.1	34.4	-2.1	0.6	-1.1	0.8	-1.5	0.7	2	0.6	1.5	0.7	-1.4	0.7	0.3
Q$445	E0CZ90	E0CZ90_MOUSE	Psme2	Proteasome activator complex subunit 2 (Fragment)	0.9999	32.73	4	2734345	1998318	2945804	2738856	293555	80385	263811	281347	24	9	20	23	-1.4	0.3	1.1	0.9	1	1	1.5	0.1	1.4	0.3	-1.1	0.9	0.07
Q$899	P11087	CO1A1_MOUSE	Col1a1	Collagen alpha-1(I) chain	0.9883	5.99	2	2732850	1440935	2592983	2300423	232544	193884	379907	254073	19	30.1	32.8	24.7	-1.9	0.02	-1.1	0.8	-1.2	0.6	1.8	0.1	1.6	0.1	-1.1	0.8	0.02
Q$1929	Q9D1Q6	ERP44_MOUSE	Erp44	Endoplasmic reticulum resident protein 44	1	13.79	3	2731501	2097029	2734564	2640501	142288	61273	212166	176815	11.6	6.5	17.3	15	-1.3	0.02	1	1	-1	1	1.3	0.1	1.3	0.09	-1	1	0.03
Q$1988	Q9DCT2	NDUS3_MOUSE	Ndufs3	NADH dehydrogenase [ubiquinone] iron-sulfur protein 3, mitochondrial	1	16.35	3	2726090	1800322	2856881	2267739	144566	97645	244996	109610	11.9	12.1	19.2	10.8	-1.5	0.004	1	0.7	-1.2	0.1	1.6	0.02	1.3	0.05	-1.3	0.1	0.001
Q$1864	Q9CR16	PPID_MOUSE	Ppid	Peptidyl-prolyl cis-trans isomerase D	1	15.14	3	2718553	2732368	3443593	3270693	159836	596061	371935	334182	13.1	48.8	24.2	22.8	1	1	1.3	0.5	1.2	0.6	1.3	0.8	1.2	0.8	-1.1	0.9	0.5
Q$996	Q3KQM4	Q3KQM4_MOUSE	U2af2	Splicing factor U2AF 65 kDa subunit	1	28.01	5	2711611	1983490	2582937	2785720	125834	74512	258611	281338	10.4	8.4	22.4	22.6	-1.4	0.006	-1	0.9	1	0.9	1.3	0.3	1.4	0.2	1.1	0.9	0.05
Q$816	O88374	O88374_MOUSE	Bcat2	Branched-chain-amino-acid aminotransferase	1	13.88	3	2711552	2083110	2720316	2455567	100575	195643	222829	78582	8.3	21	18.3	7.2	-1.3	0.1	1	1	-1.1	0.3	1.3	0.3	1.2	0.3	-1.1	0.5	0.04
Q$1902	Q9CZR8	EFTS_MOUSE	Tsfm	Elongation factor Ts, mitochondrial	1	15.12	2	2707421	1301886	2621457	2614270	252291	76516	198015	320631	20.8	13.1	16.9	27.4	-2.1	0.02	-1	1	-1	1	2	0.002	2	0.05	-1	1	0.001
Q$1534	Q6PDM2-2	SRSF1_MOUSE	Srsf	Isoform 2 of Serine/arginine-rich splicing factor 1	1	31.34	5	2666837	1053316	2697968	1998503	358820	172559	305644	376636	30.1	36.6	25.3	42.1	-2.5	0.02	1	0.9	-1.3	0.5	2.6	0.009	1.9	0.2	-1.3	0.5	0.006
Q$1939	Q9D6J5	NDUB8_MOUSE	Ndufb8	NADH dehydrogenase [ubiquinone] 1 beta subcomplex subunit 8, mitochondrial	0.9975	14.52	2	2666619	1737761	2819503	2682573	140592	85850	109036	214771	11.8	11	8.6	17.9	-1.5	0.002	1.1	0.8	1	1	1.6	0.0003	1.5	0.01	-1.1	0.8	0.0003
Q$534	E9Q7G0	E9Q7G0_MOUSE	Numa1	Protein Numa1	0.997	1.72	3	2639413	1721812	2045469	1942228	202977	153155	96966	139508	17.2	19.9	10.6	16.1	-1.5	0.04	-1.3	0.1	-1.4	0.1	1.2	0.3	1.1	0.5	-1.1	0.6	0.004
Q$912	P12382	K6PL_MOUSE	Pfkl	6-phosphofructokinase, liver type	1	5.77	3	2630872	1604974	2414870	2080735	294547	146360	274130	280003	25	20.4	25.4	30.1	-1.6	0.08	-1.1	0.7	-1.3	0.5	1.5	0.1	1.3	0.5	-1.2	0.7	0.06
Q$1057	P39749	FEN1_MOUSE	Fen1	Flap endonuclease 1	1	14.55	3	2626347	2125357	3878640	3273571	92414	224275	509852	193820	7.9	23.6	29.4	13.2	-1.2	0.2	1.5	0.2	1.2	0.07	1.8	0.07	1.5	0.03	-1.2	0.3	0.004
Q$21	A2AAW9	A2AAW9_MOUSE	Eif2s3x	Eukaryotic translation initiation factor 2 subunit 3, X-linked	1	12.79	3	2619760	1096613	2640917	2238015	179159	69853	330677	280753	15.3	14.2	28	28.1	-2.4	0.0003	1	1	-1.2	0.6	2.4	0.04	2	0.05	-1.2	0.6	0.0008
Q$643	G3UW85	G3UW85_MOUSE	Erh	ATP-dependent RNA helicase DDX3X	1	39.02	3	2618491	1762845	2817836	2647281	184470	65935	323575	143900	15.8	8.4	25.7	12.2	-1.5	0.01	1.1	0.9	1	0.9	1.6	0.1	1.5	0.003	-1.1	0.9	0.009
Q$1081	Q5RKN9	Q5RKN9_MOUSE	Capza1	Capping protein (Actin filament) muscle Z-line, alpha 1	1	31.47	4	2617501	1290671	2590865	2148769	312446	128092	227613	279427	26.7	22.2	19.6	29.1	-2	0.02	-1	0.9	-1.2	0.6	2	0.006	1.7	0.09	-1.2	0.6	0.005
Q$1224	P63037	DNJA1_MOUSE	Dnaja1	DnaJ homolog subfamily A member 1	1	6.55	2	2613514	1671033	2899001	2592718	337504	189935	360670	363725	28.9	25.4	27.8	31.4	-1.6	0.2	1.1	0.9	-1	1	1.7	0.1	1.6	0.2	-1.1	0.9	0.08
Q$805	O70194	EIF3D_MOUSE	Eif3d	Eukaryotic translation initiation factor 3 subunit D	1	6.2	2	2609822	1064848	2405330	2251712	217262	140428	307515	313087	18.6	29.5	28.6	31.1	-2.5	0.002	-1.1	0.8	-1.2	0.8	2.3	0.02	2.1	0.03	-1.1	0.8	0.002
Q$1459	Q61696	HS71A_MOUSE	Hspa1a	Heat shock 70 kDa protein 1A	1	6.08	2	2607801	942364	2587782	2071592	386245	114160	302539	351648	33.1	27.1	26.1	38	-2.8	0.05	-1	1	-1.3	0.7	2.7	0.006	2.2	0.06	-1.2	0.7	0.005
Q$169	D3YUK4	D3YUK4_MOUSE	Ndufb10	NADH dehydrogenase [ubiquinone] 1 beta subcomplex subunit 10 (Fragment)	1	9.4	1	2606650	2640770	2412430	2233380	255526	239625	321570	253697	21.9	20.3	29.8	25.4	1	1	-1.1	1	-1.2	0.9	-1.1	1	-1.2	0.9	-1.1	1	0.7
Q$1433	Q61033-2	LAP2A_MOUSE	Tmp	Isoform Zeta of Lamina-associated polypeptide 2, isoforms alpha/zeta	1	41.78	6	2596838	1236035	2106995	2189490	200864	72121	157058	224804	17.3	13	16.7	23	-2.1	0.001	-1.2	0.2	-1.2	0.4	1.7	0.005	1.8	0.04	1	0.8	0.0004
Q$2083	Q9WVA2	TIM8A_MOUSE	Timm8a1	Mitochondrial import inner membrane translocase subunit Tim8 A	0.9989	26.8	2	2594815	1379162	3033694	2580483	298692	186407	343349	318083	25.7	30.2	25.3	27.6	-1.9	0.04	1.2	0.7	-1	1	2.2	0.02	1.9	0.05	-1.2	0.7	0.007
Q$2013	Q9JHU9	INO1_MOUSE	Isyna1	Inositol-3-phosphate synthase 1	1	4.13	2	2590371	1129233	2163653	2035909	179943	308128	527594	350707	15.5	61	54.5	38.5	-2.3	0.02	-1.2	0.7	-1.3	0.5	1.9	0.4	1.8	0.4	-1.1	0.8	0.07
Q$2047	Q9QZE5	COPG1_MOUSE	Copg1	Coatomer subunit gamma-1	1	7.89	4	2587136	1421968	2941985	2321991	210411	63257	504752	401200	18.2	9.9	38.4	38.6	-1.8	0.02	1.1	0.8	-1.1	0.8	2.1	0.2	1.6	0.3	-1.3	0.7	0.04
Q$112	P61255	RL26_MOUSE	Rpl26	60S ribosomal protein L26	0.9975	5.52	1	2584760	1036149	2608615	2353735	160371	76513	292606	299027	13.9	16.5	25.1	28.4	-2.5	0.0001	1	0.9	-1.1	0.9	2.5	0.02	2.3	0.04	-1.1	0.9	0.0004
Q$1570	Q80UR4	Q80UR4_MOUSE	Prss34	Mast cell protease-11	0.9999	8.49	2	2583298	2674102	3791723	1966599	249375	496770	922429	488475	21.6	41.5	54.4	55.5	1	0.9	1.5	0.8	-1.3	0.8	1.4	0.8	-1.4	0.8	-1.9	0.5	0.2
Q$1504	Q64445	COX8A_MOUSE	Cox8a	Cytochrome c oxidase subunit 8A, mitochondrial	0.986	49.28	1	2580250	2314650	2917530	2819800	110934	297877	272243	330348	9.6	28.8	20.9	26.2	-1.1	0.8	1.1	0.8	1.1	0.8	1.3	0.7	1.2	0.8	-1	0.8	0.4
Q$1681	Q8K297	GT251_MOUSE	Colgalt1	Procollagen galactosyltransferase 1	0.9925	3.08	2	2573155	1105467	2425713	2119093	166687	132808	217262	118933	14.5	26.9	20	12.5	-2.3	0.0008	-1.1	0.6	-1.2	0.2	2.2	0.003	1.9	0.002	-1.1	0.4	4e-05
Q$2096	Q9Z1G3	VATC1_MOUSE	Atp6v1c1	V-type proton ATPase subunit C 1	0.9995	11.26	2	2560751	755810	2736402	2286857	398677	81003	396068	238480	34.8	24	32.4	23.3	-3.4	0.04	1.1	0.8	-1.1	0.8	3.6	0.03	3	0.002	-1.2	0.7	0.001
Q$1475	Q62095	DDX3Y_MOUSE	Ddx3y	ATP-dependent RNA helicase DDX3Y	1	13.83	7	2549646	1593869	2354836	2132448	188949	101338	180745	218605	16.6	14.2	17.2	22.9	-1.6	0.01	-1.1	0.7	-1.2	0.5	1.5	0.03	1.3	0.2	-1.1	0.7	0.009
Q$1947	Q9D819	IPYR_MOUSE	Ppa1	Inorganic pyrophosphatase	1	13.15	4	2544503	1538195	2613264	2369127	214169	127796	226591	296525	18.8	18.6	19.4	28	-1.7	0.02	1	0.9	-1.1	0.9	1.7	0.02	1.5	0.1	-1.1	0.9	0.01
Q$1644	Q8C266	Q8C266_MOUSE	Rab5c	Ras-related protein Rab-5C	1	16.67	3	2523988	1285672	2348430	2077389	119770	48126	181670	99964	10.6	8.4	17.3	10.8	-2	7e-05	-1.1	0.4	-1.2	0.06	1.8	0.01	1.6	0.0005	-1.1	0.4	1e-05
Q$1116	P52293	IMA1_MOUSE	Kpna2	Importin subunit alpha-1	1	10.4	4	2509982	1534051	2642239	2602256	149584	159031	379291	325045	13.3	23.2	32.1	27.9	-1.6	0.01	1.1	1	1	1	1.7	0.1	1.7	0.09	-1	1	0.03
Q$1750	Q91YR7	PRP6_MOUSE	Prpf6	Pre-mRNA-processing factor 6	1	5.42	4	2507196	1342706	3286094	2584231	272079	230553	390452	97037	24.3	38.4	26.6	8.4	-1.9	0.04	1.3	0.4	1	0.8	2.4	0.01	1.9	0.007	-1.3	0.4	0.001
Q$1621	Q8BMJ2	SYLC_MOUSE	Lars	Leucine--tRNA ligase, cytoplasmic	0.9983	6.62	4	2506586	1239234	2715407	2371399	160284	58182	353878	120035	14.3	10.5	29.1	11.3	-2	0.0004	1.1	0.8	-1.1	0.8	2.2	0.05	1.9	0.0002	-1.1	0.8	0.0005
Q$269	D3Z6I8	D3Z6I8_MOUSE	Tpm3	Tropomyosin alpha-3 chain	1	28.34	10	2506514	1458241	2814749	2581115	218072	55951	334590	275684	19.5	8.6	26.6	23.9	-1.7	0.04	1.1	0.8	1	0.8	1.9	0.07	1.8	0.07	-1.1	0.8	0.006
Q$1436	Q61074	PPM1G_MOUSE	Ppm1g	Protein phosphatase 1G	1	4.8	2	2498588	1449592	2485104	2133713	104661	152569	291645	366795	9.4	23.5	26.2	38.4	-1.7	0.003	-1	1	-1.2	0.8	1.7	0.07	1.5	0.4	-1.2	0.8	0.03
Q$50	A2AL50	A2AL50_MOUSE	Agps	Alkyldihydroxyacetonephosphate synthase, peroxisomal	1	14.61	6	2492539	1396025	2924450	2886520	245043	90818	346815	237764	22	14.5	26.5	18.4	-1.8	0.01	1.2	0.6	1.2	0.6	2.1	0.04	2.1	0.002	-1	0.9	0.001
Q$1978	Q9DCB8	ISCA2_MOUSE	Isca2	Iron-sulfur cluster assembly 2 homolog, mitochondrial	0.999	15.58	2	2484335	1492354	2809783	2550191	230413	38995	388807	202157	20.7	5.8	30.9	17.7	-1.7	0.06	1.1	0.9	1	0.9	1.9	0.1	1.7	0.03	-1.1	0.9	0.009
Q$2071	Q9WU78-3	PDC6I_MOUSE	Pdcd6i	Isoform 3 of Programmed cell death 6-interacting protein	1	14.87	8	2483600	1967347	2496684	2423554	100449	56017	249604	152490	9	6.4	22.4	14.1	-1.3	0.01	1	1	-1	1	1.3	0.3	1.2	0.1	-1	1	0.09
Q$183	D3YW68	D3YW68_MOUSE	Rpl23a-ps1	MCG1031564	1	12.9	3	2483503	1517799	2769478	1812376	977350	455083	914191	234953	88	67	73.8	29	-1.6	0.9	1.1	0.9	-1.4	0.9	1.8	0.8	1.2	0.9	-1.5	0.9	0.6
Q$222	D3Z041	D3Z041_MOUSE	Acsl1	Long-chain-fatty-acid--CoA ligase 1	1	10.73	6	2483445	3036296	2980480	2909657	113446	382071	340265	367697	10.2	28.1	25.5	28.3	1.2	0.7	1.2	0.7	1.2	0.8	-1	1	-1	1	-1	1	0.6
Q$1961	Q9DB05	SNAA_MOUSE	Napa	Alpha-soluble NSF attachment protein	1	12.2	3	2479565	1900677	2717745	2397485	207201	270487	455813	257325	18.7	31.8	37.5	24	-1.3	0.6	1.1	0.9	-1	0.9	1.4	0.6	1.3	0.6	-1.1	0.9	0.3
Q$1398	Q5ND04	HSF5_MOUSE	Hsf5	Heat shock factor protein 5	0.9858	8.97	2	2472513	2712882	3811294	4097888	439244	589547	700033	1070562	39.7	48.6	41.1	58.4	1.1	0.9	1.5	0.6	1.7	0.7	1.4	0.7	1.5	0.7	1.1	0.9	0.3
Q$1843	Q9CQ60	6PGL_MOUSE	Pgls	6-phosphogluconolactonase	1	29.57	3	2471662	1872061	2655761	2392777	148815	129437	130820	241556	13.5	15.5	11	22.6	-1.3	0.08	1.1	0.7	-1	0.8	1.4	0.02	1.3	0.3	-1.1	0.7	0.03
Q$1719	Q8VDM6-2	HNRL1_MOUSE	Hnrnpul	Isoform 2 of Heterogeneous nuclear ribonucleoprotein U-like protein 1	0.9999	9.49	4	2470025	1195557	2393151	2016210	145951	90463	230899	221348	13.2	16.9	21.6	24.5	-2.1	0.0004	-1	0.8	-1.2	0.3	2	0.007	1.7	0.04	-1.2	0.5	0.0005
Q$1292	P97426	ECP1_MOUSE	Ear1	Eosinophil cationic protein 1	1	30.32	3	2469308	1456566	2735778	2299089	249157	120925	91067	309807	22.6	18.6	7.4	30.1	-1.7	0.03	1.1	0.6	-1.1	0.7	1.9	0.0002	1.6	0.1	-1.2	0.6	0.004
Q$1265	P70697	DCUP_MOUSE	Urod	Uroporphyrinogen decarboxylase	0.9998	6.27	2	2456368	2384366	2859902	2531862	369994	331988	323558	496283	33.7	31.1	25.3	43.8	-1	1	1.2	0.9	1	1	1.2	0.9	1.1	1	-1.1	1	0.8
Q$147	B7ZCP4	B7ZCP4_MOUSE	Cpne1	Copine-1	0.9996	6.04	3	2452493	1791851	2849361	2651879	390008	140582	320205	287089	35.6	17.5	25.1	24.2	-1.4	0.5	1.2	0.8	1.1	0.9	1.6	0.09	1.5	0.1	-1.1	0.9	0.1
Q$223	Q3U108-2	ARI5A_MOUSE	Arid5	Isoform 2 of AT-rich interactive domain-containing protein 5A	0.9269	1.78	1	2448890	936750	2609918	1514320	909671	398771	813245	224007	83.1	95.2	69.7	33.1	-2.6	0.6	1.1	0.9	-1.6	0.7	2.8	0.5	1.6	0.7	-1.7	0.7	0.3
Q$1803	Q99L45	IF2B_MOUSE	Eif2s2	Eukaryotic translation initiation factor 2 subunit 2	0.9972	3.02	1	2440670	1999010	2700240	2838160	324902	129304	292681	265135	29.8	14.5	24.2	20.9	-1.2	0.7	1.1	0.8	1.2	0.8	1.4	0.3	1.4	0.1	1.1	0.8	0.2
Q$1146	P59017	B2L13_MOUSE	Bcl2l13	Bcl-2-like protein 13	0.9993	8.99	2	2438419	927394	2539916	2150576	279684	76500	321670	167923	25.6	18.4	28.3	17.5	-2.6	0.02	1	0.8	-1.1	0.7	2.7	0.02	2.3	0.001	-1.2	0.7	0.0005
Q$811	O70456	1433S_MOUSE	Sfn	14-3-3 protein sigma	1	23.39	4	2434459	774407	2037249	1839064	441921	60615	277965	128176	40.6	17.5	30.5	15.6	-3.1	0.07	-1.2	0.7	-1.3	0.6	2.6	0.05	2.4	0.0004	-1.1	0.7	0.003
Q$1612	Q8BK64	AHSA1_MOUSE	Ahsa1	Activator of 90 kDa heat shock protein ATPase homolog 1	0.9978	10.06	2	2433083	1217607	2466536	2035384	123758	69511	277042	258945	11.4	12.8	25.1	28.4	-2	0.0002	1	0.9	-1.2	0.5	2	0.04	1.7	0.1	-1.2	0.5	0.002
Q$1795	Q99KK7	DPP3_MOUSE	Dpp3	Dipeptidyl peptidase 3	0.9999	9.08	3	2432796	2036746	2858569	2357198	114734	210604	401923	194581	10.5	23.1	31.4	18.5	-1.2	0.5	1.2	0.8	-1	0.8	1.4	0.5	1.2	0.8	-1.2	0.8	0.2
Q$1489	Q62446	FKBP3_MOUSE	Fkbp3	Peptidyl-prolyl cis-trans isomerase FKBP3	0.9936	4.91	1	2424990	1444905	4141520	3361620	288358	133084	926265	355817	26.6	20.6	50	23.7	-1.7	0.07	1.7	0.3	1.4	0.2	2.9	0.2	2.3	0.006	-1.2	0.5	0.01
Q$280	D3Z7P3-2	GLSK_MOUSE	Gl	Isoform 2 of Glutaminase kidney isoform, mitochondrial	0.9995	7.13	2	2405300	1283573	2230048	1847546	185892	99085	308678	138335	17.3	17.3	31	16.7	-1.9	0.004	-1.1	0.6	-1.3	0.1	1.7	0.1	1.4	0.05	-1.2	0.5	0.005
Q$939	P16627	HS71L_MOUSE	Hspa1l	Heat shock 70 kDa protein 1-like	1	1.87	1	2404493	823703	2431563	1898680	381814	115326	297041	342635	35.5	31.3	27.3	40.4	-2.9	0.06	1	1	-1.3	0.6	3	0.006	2.3	0.07	-1.3	0.6	0.005
Q$2073	Q9WUA3-2	K6PP_MOUSE	Pfk	Isoform 2 of 6-phosphofructokinase type C	1	19.76	4	2400616	1112605	2418875	2324725	241804	40732	256158	150523	22.5	8.2	23.7	14.5	-2.2	0.03	1	1	-1	1	2.2	0.03	2.1	0.005	-1	1	0.0004
Q$1668	Q8JZK9	HMCS1_MOUSE	Hmgcs1	Hydroxymethylglutaryl-CoA synthase, cytoplasmic	0.9999	10	2	2399608	941898	1902057	1958851	483874	38002	199237	105433	45.1	9	23.4	12	-2.5	0.1	-1.3	0.7	-1.2	0.7	2	0.04	2.1	0.0001	1	0.8	0.01
Q$2086	Q9WVE8	PACN2_MOUSE	Pacsin2	Protein kinase C and casein kinase substrate in neurons protein 2	0.972	2.26	1	2395410	1132472	2122590	1905819	221464	123084	324839	186215	20.7	24.3	34.2	21.8	-2.1	0.006	-1.1	0.8	-1.3	0.3	1.9	0.08	1.7	0.04	-1.1	0.8	0.007
Q$1520	Q6IMF0	KRT83_MOUSE	Krt83	Keratin, type II cuticular Hb3	1	15.76	7	2390452	7487896	2733823	3960080	172874	3945811	301935	1100457	16.2	117.8	24.7	62.1	3.1	0.8	1.1	0.8	1.7	0.8	-2.7	0.8	-1.9	0.8	1.4	0.8	0.3
Q$1511	Q64737	PUR2_MOUSE	Gart	Trifunctional purine biosynthetic protein adenosine-3	1	5.45	3	2388706	1314643	2126527	1788121	92105	139267	315332	210401	8.6	23.7	33.2	26.3	-1.8	0.001	-1.1	0.6	-1.3	0.1	1.6	0.2	1.4	0.3	-1.2	0.6	0.01
Q$1211	P62889	RL30_MOUSE	Rpl30	60S ribosomal protein L30	1	37.39	4	2382345	1875463	2322808	2195726	74889	107131	96921	94650	7	12.8	9.3	9.6	-1.3	0.03	-1	0.6	-1.1	0.4	1.2	0.07	1.2	0.2	-1.1	0.6	0.007
Q$78	A2AW41	A2AW41_MOUSE	Hnrnpr	Protein Hnrnpr (Fragment)	1	16.3	4	2368750	933612	2074378	1745552	108212	132320	306659	302773	10.2	31.7	33.1	38.8	-2.5	0.0002	-1.1	0.6	-1.4	0.2	2.2	0.04	1.9	0.1	-1.2	0.6	0.003
Q$1170	P61971	NTF2_MOUSE	Nutf2	Nuclear transport factor 2	0.9998	23.62	2	2368466	1225898	2045137	1905280	81940	80875	114409	210303	7.7	14.8	12.5	24.7	-1.9	5e-05	-1.2	0.1	-1.2	0.1	1.7	0.002	1.6	0.07	-1.1	0.6	0.0001
Q$480	E9PZC3	E9PZC3_MOUSE	Blvrb	Flavin reductase (NADPH)	1	38.46	6	2366366	1266086	3369573	2679918	175281	67088	396636	328960	16.6	11.8	26.3	27.4	-1.9	0.002	1.4	0.1	1.1	0.4	2.7	0.03	2.1	0.05	-1.3	0.4	0.0005
Q$620	F7CAZ6	F7CAZ6_MOUSE	Capzb	F-actin-capping protein subunit beta (Fragment)	1	35.29	5	2366084	1337747	2381110	2086072	197547	61107	237478	178731	18.7	10.2	22.3	19.2	-1.8	0.02	1	1	-1.1	0.7	1.8	0.04	1.6	0.02	-1.1	0.7	0.003
Q$231	D3Z0Y2	D3Z0Y2_MOUSE	Prdx6	Peroxiredoxin-6	1	24.5	3	2350526	1138750	2336390	2011974	97342	106177	194001	177629	9.3	20.8	18.6	19.7	-2.1	0.0002	-1	0.9	-1.2	0.3	2.1	0.003	1.8	0.01	-1.2	0.4	8e-05
Q$65	Q8C570	RAE1L_MOUSE	Rae1	mRNA export factor	1	14.13	3	2349027	1238803	2234212	2184329	103124	97376	320551	114998	9.8	17.6	32.1	11.8	-1.9	0.0003	-1.1	0.9	-1.1	0.7	1.8	0.1	1.8	0.001	-1	0.9	0.002
Q$537	Q8CAQ8-2	IMMT_MOUSE	Imm	Isoform 2 of Mitochondrial inner membrane protein	1	14.08	7	2348163	1018570	1118421	1095207	1113160	271092	81479	88380	106	59.5	16.3	18	-2.3	0.9	-2.1	0.9	-2.1	0.9	1.1	1	1.1	1	-1	1	0.3
Q$1852	Q9CQM5	TXD17_MOUSE	Txndc17	Thioredoxin domain-containing protein 17	0.9998	18.7	2	2342946	1207119	2213911	1916215	56073	49939	201700	199717	5.4	9.3	20.4	23.3	-1.9	2e-06	-1.1	0.6	-1.2	0.3	1.8	0.03	1.6	0.08	-1.2	0.5	0.0002
Q$1286	P97352	S10AD_MOUSE	S100a13	Protein S100-A13	0.9797	11.22	1	2336420	1285102	2040350	1861260	127493	303947	243955	218309	12.2	52.9	26.7	26.2	-1.8	0.07	-1.1	0.5	-1.3	0.4	1.6	0.4	1.4	0.4	-1.1	0.6	0.04
Q$225	D3Z0B9	D3Z0B9_MOUSE	Aldh16a1	Aldehyde dehydrogenase family 16 member A1	0.9779	2.52	1	2323950	945785	2032615	1799515	211780	52572	199135	144049	20.4	12.4	21.9	17.9	-2.5	0.01	-1.1	0.6	-1.3	0.2	2.1	0.02	1.9	0.003	-1.1	0.6	0.0001
Q$823	O88593	PGRP1_MOUSE	Pglyrp1	Peptidoglycan recognition protein 1	0.9992	19.78	2	2323362	1248867	2331455	1853542	82667	64505	153987	189078	8	11.5	14.8	22.8	-1.9	4e-05	1	1	-1.3	0.1	1.9	0.001	1.5	0.06	-1.3	0.2	7e-05
Q$1653	Q8CAQ8-5	IMMT_MOUSE	Imm	Isoform 5 of Mitochondrial inner membrane protein	1	10.38	6	2313224	991993	1078319	1056582	1117199	273120	79236	85159	108	61.6	16.4	18	-2.3	0.9	-2.1	0.9	-2.2	0.9	1.1	1	1.1	1	-1	1	0.3
Q$479	E9PZ69	E9PZ69_MOUSE	Tm9sf2	Transmembrane 9 superfamily member 2	0.9554	6.64	1	2310735	2151265	2660280	2302800	84203	251369	294596	245184	8.1	26.1	24.8	23.8	-1.1	0.9	1.2	0.8	-1	1	1.2	0.8	1.1	0.9	-1.2	0.9	0.5
Q$1847	Q9CQC7	NDUB4_MOUSE	Ndufb4	NADH dehydrogenase [ubiquinone] 1 beta subcomplex subunit 4	0.9892	19.38	1	2299060	907551	1883410	1530603	78027	79542	250787	235395	7.6	19.6	29.8	34.4	-2.5	9e-06	-1.2	0.3	-1.5	0.07	2.1	0.07	1.7	0.1	-1.2	0.3	0.0004
Q$645	G3UWD7	G3UWD7_MOUSE	Gm10269	MCG123152	0.9989	10.57	2	2293047	1328898	2307380	2011009	164890	233888	267906	181390	16.1	39.4	26	20.2	-1.7	0.06	1	1	-1.1	0.6	1.7	0.1	1.5	0.2	-1.1	0.6	0.02
Q$1143	P57787	MOT4_MOUSE	Slc16a3	Monocarboxylate transporter 4	0.9999	2.77	2	2290104	867761	2116354	1856167	230247	60053	219524	263823	22.5	15.5	23.2	31.8	-2.6	0.02	-1.1	0.7	-1.2	0.6	2.4	0.02	2.1	0.07	-1.1	0.7	0.0009
Q$71	Q64012-2	RALY_MOUSE	Ral	Isoform 1 of RNA-binding protein Raly	1	25.34	5	2287965	836150	2234941	1886131	232628	138642	357920	278399	22.7	37.1	35.8	33	-2.7	0.004	-1	0.9	-1.2	0.7	2.7	0.03	2.3	0.04	-1.2	0.7	0.004
Q$217	D3YZS3	D3YZS3_MOUSE	Ube2l3	Ubiquitin-conjugating enzyme E2 L3	1	44.54	4	2283890	1143017	2188200	1934242	136172	84922	182609	205524	13.3	16.6	18.7	23.8	-2	0.0006	-1	0.7	-1.2	0.5	1.9	0.004	1.7	0.03	-1.1	0.6	0.0004
Q$832	Q8BG13	Q8BG13_MOUSE	Rbm3	Putative RNA-binding protein 3	1	38.96	5	2283018	1354506	1991797	1896037	157490	115188	172510	234583	15.4	19	19.4	27.7	-1.7	0.009	-1.1	0.5	-1.2	0.5	1.5	0.07	1.4	0.3	-1.1	0.8	0.01
Q$119	Q64518-2	AT2A3_MOUSE	Atp2a	Isoform SERCA3A of Sarcoplasmic/endoplasmic reticulum calcium ATPase 3	1	17.52	12	2274327	1356954	2346203	2296221	173526	110372	181237	194991	17.1	18.2	17.3	19	-1.7	0.01	1	1	1	1	1.7	0.01	1.7	0.01	-1	1	0.002
Q$1435	Q61036-2	PAK3_MOUSE	Pak	Isoform 2 of Serine/threonine-protein kinase PAK 3	1	6.99	2	2262248	1152594	2316313	2112547	194922	101917	332117	326311	19.3	19.8	32.1	34.5	-2	0.006	1	1	-1.1	1	2	0.1	1.8	0.1	-1.1	1	0.02
Q$2110	Q9Z2U1	PSA5_MOUSE	Psma5	Proteasome subunit alpha type-5	1	21.16	2	2259371	1051167	2236294	1888442	130333	90300	255967	212271	12.9	19.2	25.6	25.1	-2.1	0.0004	-1	0.9	-1.2	0.4	2.1	0.01	1.8	0.03	-1.2	0.5	0.0008
Q$2000	Q9ERL7	GMFG_MOUSE	Gmfg	Glia maturation factor gamma	1	32.39	3	2257705	962130	2247924	2390214	146449	168142	224217	147126	14.5	39.1	22.3	13.8	-2.3	0.002	-1	1	1.1	0.9	2.3	0.007	2.5	0.001	1.1	0.9	7e-05
Q$1210	P62874	GBB1_MOUSE	Gnb1	Guanine nucleotide-binding protein G(I)/G(S)/G(T) subunit beta-1	1	32.35	8	2255102	1622799	2328810	2061012	151702	256790	135563	123678	15	35.4	13	13.4	-1.4	0.3	1	0.7	-1.1	0.6	1.4	0.2	1.3	0.5	-1.1	0.5	0.05
Q$1814	Q99M74	KRT82_MOUSE	Krt82	Keratin, type II cuticular Hb2	1	6.2	3	2250014	52487763	1592160	19754586	285374	26282920	71497	18008964	28.4	112	10	203.8	23.3	0.5	-1.4	0.4	8.8	0.7	-33	0.5	-2.7	0.7	12.4	0.7	0.1
Q$196	D3YXG6	D3YXG6_MOUSE	Arpc2	Actin-related protein 2/3 complex subunit 2	1	22.18	5	2248471	870910	1964949	1841280	203378	92281	194807	244209	20.2	23.7	22.2	29.7	-2.6	0.002	-1.1	0.6	-1.2	0.6	2.3	0.005	2.1	0.02	-1.1	0.7	0.0007
Q$1613	Q8BK67	RCC2_MOUSE	Rcc2	Protein RCC2	0.9679	7.31	2	2243343	983137	1989322	2314793	805623	84769	361201	923885	80.3	19.3	40.6	89.2	-2.3	0.7	-1.1	1	1	1	2	0.3	2.4	0.7	1.2	1	0.5
Q$2052	Q9R0E1	PLOD3_MOUSE	Plod3	Procollagen-lysine,2-oxoglutarate 5-dioxygenase 3	0.9958	1.35	1	2242698	2328355	1872561	1726520	302835	1568916	350921	322114	30.2	150.7	41.9	41.7	1	1	-1.2	0.9	-1.3	0.9	-1.2	1	-1.3	1	-1.1	1	0.9
Q$1957	Q9D8V7	SC11C_MOUSE	Sec11c	Signal peptidase complex catalytic subunit SEC11C	0.9965	16.67	2	2237596	1431840	2229289	2090296	138035	107772	306065	204477	13.8	16.8	30.7	21.9	-1.6	0.01	-1	1	-1.1	0.9	1.6	0.1	1.5	0.1	-1.1	0.9	0.04
Q$1984	Q9DCL9	PUR6_MOUSE	Paics	Multifunctional protein ADE2	1	13.65	5	2236418	1732596	2156703	1938744	83245	86883	119944	123550	8.3	11.2	12.4	14.2	-1.3	0.02	-1	0.6	-1.2	0.3	1.2	0.1	1.1	0.5	-1.1	0.5	0.02
Q$2058	Q9R190	MTA2_MOUSE	Mta2	Metastasis-associated protein MTA2	0.9999	1.5	1	2233680	637888	2289330	1827680	203717	65239	357816	327758	20.4	22.9	34.9	40.1	-3.5	0.005	1	0.9	-1.2	0.7	3.6	0.04	2.9	0.08	-1.3	0.7	0.001
Q$1020	P30204-2	MSRE_MOUSE	Msr	Isoform II of Macrophage scavenger receptor types I and II	0.999	12.15	2	2223638	1319918	3098777	3110092	1199880	765025	1495188	1363036	120.7	129.6	107.9	98	-1.7	1	1.4	1	1.4	1	2.3	0.9	2.4	0.9	1	1	0.7
Q$170	D3YUM1	D3YUM1_MOUSE	Ndufv1	NADH dehydrogenase [ubiquinone] flavoprotein 1, mitochondrial	0.9999	25.93	6	2217217	1201855	1651278	1751190	59947	86080	246691	177631	6	16	33.4	22.7	-1.8	6e-05	-1.3	0.2	-1.3	0.1	1.4	0.2	1.5	0.1	1.1	0.8	0.004
Q$1415	Q60631	GRB2_MOUSE	Grb2	Growth factor receptor-bound protein 2	0.9997	33.18	4	2212504	1191106	2397269	1975121	168711	104188	205922	195752	17.1	19.6	19.2	22.2	-1.9	0.005	1.1	0.6	-1.1	0.6	2	0.005	1.7	0.03	-1.2	0.4	0.0008
Q$1742	Q91WK2	EIF3H_MOUSE	Eif3h	Eukaryotic translation initiation factor 3 subunit H	0.997	9.94	2	2210254	2384469	2076973	2310736	189574	168766	85923	113236	19.2	15.8	9.3	11	1.1	0.9	-1.1	0.9	1	0.9	-1.1	0.6	-1	0.9	1.1	0.6	0.5
Q$724	Q6ZWV3	RL10_MOUSE	Rpl10	60S ribosomal protein L10	1	19.63	5	2196652	1345863	1899309	1544797	628795	240101	406721	108214	64	39.9	47.9	15.7	-1.6	0.8	-1.2	0.8	-1.4	0.8	1.4	0.8	1.1	0.8	-1.2	0.8	0.5
Q$548	E9QAS4	E9QAS4_MOUSE	Chd4	Chromodomain-helicase-DNA-binding protein 4	1	4.47	5	2192511	786677	2113609	1761505	271242	117704	338590	253611	27.7	33.5	35.8	32.2	-2.8	0.009	-1	0.9	-1.2	0.6	2.7	0.03	2.2	0.03	-1.2	0.7	0.005
Q$1844	Q9CQ75	NDUA2_MOUSE	Ndufa2	NADH dehydrogenase [ubiquinone] 1 alpha subcomplex subunit 2	1	24.24	2	2189723	968278	2794848	2099829	466756	39635	383474	492411	47.7	9.2	30.7	52.4	-2.3	0.3	1.3	0.7	-1	0.9	2.9	0.05	2.2	0.3	-1.3	0.7	0.03
Q$1201	Q5SW88	Q5SW88_MOUSE	Rab1	Ras-related protein Rab-1A	1	40.1	5	2187074	1365396	2063852	1985248	139111	53206	219120	165042	14.2	8.7	23.7	18.6	-1.6	0.003	-1.1	0.9	-1.1	0.8	1.5	0.1	1.5	0.08	-1	0.9	0.009
Q$1641	Q8C129	LCAP_MOUSE	Lnpep	Leucyl-cystinyl aminopeptidase	0.9211	1.27	1	2182640	1441716	1683701	2384410	205785	180569	259752	315126	21.1	28	34.5	29.6	-1.5	0.2	-1.3	0.4	1.1	0.7	1.2	0.7	1.7	0.2	1.4	0.4	0.05
Q$800	O55135	IF6_MOUSE	Eif6	Eukaryotic translation initiation factor 6	0.9985	9.8	1	2174130	1060139	2518590	3089580	265802	110846	265175	467299	27.3	23.4	23.5	33.8	-2.1	0.02	1.2	0.5	1.4	0.3	2.4	0.006	2.9	0.04	1.2	0.5	0.002
Q$1418	Q60692	PSB6_MOUSE	Psmb6	Proteasome subunit beta type-6	1	39.08	4	2171121	1891461	2161243	1871720	163781	537235	246972	175826	16.9	63.5	25.6	21	-1.1	1	-1	1	-1.2	0.8	1.1	1	-1	1	-1.2	0.9	0.8
Q$1994	Q9EQI5	Q9EQI5_MOUSE	Ppbp	Chemokine (C-X-C motif) ligand 7, isoform CRA_b	1	41.59	3	2157631	1620529	5653136	6873395	415519	253627	859376	1465173	43.1	35	34	47.7	-1.3	0.5	2.6	0.04	3.2	0.09	3.5	0.04	4.2	0.08	1.2	0.5	0.001
Q$544	E9QA93	E9QA93_MOUSE	Alox5	Arachidonate 5-lipoxygenase	1	8.1	4	2150492	1587051	2744783	2859773	72408	101620	181466	314292	7.5	14.3	14.8	24.6	-1.4	0.01	1.3	0.05	1.3	0.2	1.7	0.003	1.8	0.02	1	0.8	0.0008
Q$178	Q64213-3	SF01_MOUSE	Sf	Isoform 3 of Splicing factor 1	1	12.21	5	2144642	996351	2304165	1905460	225682	76674	242397	174359	23.5	17.2	23.5	20.5	-2.2	0.008	1.1	0.7	-1.1	0.7	2.3	0.02	1.9	0.008	-1.2	0.5	0.0008
Q$210	O09106	HDAC1_MOUSE	Hdac1	Histone deacetylase 1	1	8.51	3	2143483	1156126	2452090	1928576	247872	82822	222362	158518	25.9	16	20.3	18.4	-1.9	0.02	1.1	0.6	-1.1	0.6	2.1	0.004	1.7	0.01	-1.3	0.3	0.001
Q$771	O09172	GSH0_MOUSE	Gclm	Glutamate--cysteine ligase regulatory subunit	1	16.06	3	2142345	1767925	2033587	1901871	115344	83783	142816	47430	12	10.6	15.7	5.6	-1.2	0.2	-1.1	0.6	-1.1	0.4	1.2	0.5	1.1	0.5	-1.1	0.6	0.1
Q$2090	Q9Z0N2	IF2H_MOUSE	Eif2s3y	Eukaryotic translation initiation factor 2 subunit 3, Y-linked	1	18.64	5	2141496	1365014	2225290	1833258	119053	45966	198184	211183	12.4	7.5	19.9	25.8	-1.6	0.002	1	0.7	-1.2	0.5	1.6	0.05	1.3	0.3	-1.2	0.5	0.006
Q$17	Q8VE97	SRSF4_MOUSE	Srsf4	Serine/arginine-rich splicing factor 4	1	1.84	1	2140712	1047542	2406635	2099103	115711	173733	280330	258130	12.1	37.1	26	27.5	-2	0.005	1.1	0.8	-1	0.9	2.3	0.02	2	0.04	-1.1	0.8	0.002
Q$182	D3YW48	D3YW48_MOUSE	Capns1	Calpain small subunit 1 (Fragment)	1	20.33	3	2135685	825185	2013532	1723984	195125	59083	275139	274853	20.4	16	30.6	35.6	-2.6	0.01	-1.1	0.7	-1.2	0.6	2.4	0.05	2.1	0.1	-1.2	0.7	0.003
Q$885	P09528	FRIH_MOUSE	Fth1	Ferritin heavy chain	0.9422	6.04	1	2131020	1150763	2440720	1910580	170700	86029	434524	282267	17.9	16.7	39.8	33	-1.9	0.005	1.1	0.8	-1.1	0.8	2.1	0.2	1.7	0.2	-1.3	0.7	0.03
Q$1374	Q3UGC7	EI3JA_MOUSE	Eif3j1	Eukaryotic translation initiation factor 3 subunit J-A	1	9.58	3	2122711	1261996	2149737	1864275	65243	25944	251723	164212	6.9	4.6	26.2	19.7	-1.7	1e-05	1	0.9	-1.1	0.5	1.7	0.1	1.5	0.1	-1.2	0.6	0.003
Q$622	F8VPY2	F8VPY2_MOUSE	Taf5	Transcription initiation factor TFIID subunit 5	0.9994	11.86	3	2122695	15436156	6527081	6868520	197134	5856662	2837246	3126728	20.8	84.8	97.2	101.8	7.3	0.4	3.1	0.7	3.2	0.7	-2.4	0.7	-2.2	0.7	1.1	0.9	0.1
Q$456	E9PVX6	E9PVX6_MOUSE	Mki67	Protein Mki67	1	0.66	2	2120976	1432182	1704069	1736345	372325	466041	193833	369641	39.3	72.8	25.4	47.6	-1.5	0.9	-1.2	0.9	-1.2	0.9	1.2	0.9	1.2	0.9	1	0.9	0.6
Q$123	B1AVK5	B1AVK5_MOUSE	Col4a6	Protein Col4a6	0.9905	2.48	1	2119520	934394	2313760	1823880	204515	182484	388532	101025	21.6	43.7	37.5	12.4	-2.3	0.02	1.1	0.7	-1.2	0.5	2.5	0.05	2	0.02	-1.3	0.5	0.005
Q$262	D3Z536	D3Z536_MOUSE	Gm8225	Protein Gm8225	1	8.56	2	2117703	1282464	2146479	1901588	178852	93891	252109	199261	18.9	16.4	26.3	23.4	-1.7	0.02	1	0.9	-1.1	0.8	1.7	0.06	1.5	0.09	-1.1	0.8	0.02
Q$198	D3YXQ8	D3YXQ8_MOUSE	Ruvbl2	RuvB-like 2 (Fragment)	0.9998	4.98	1	2107995	552607	1846630	1317630	153830	67227	387218	151224	16.3	27.2	46.9	25.7	-3.8	9e-05	-1.1	0.5	-1.6	0.03	3.3	0.08	2.4	0.008	-1.4	0.4	0.0008
Q$612	Q60668-2	HNRPD_MOUSE	Hnrnp	Isoform 2 of Heterogeneous nuclear ribonucleoprotein D0	1	20.83	5	2102075	1112448	1998051	1760865	137023	46784	158126	199381	14.6	9.4	17.7	25.3	-1.9	0.0008	-1.1	0.6	-1.2	0.5	1.8	0.02	1.6	0.1	-1.1	0.6	0.0009
Q$1909	Q9D0J8	PTMS_MOUSE	Ptms	Parathymosin	0.965	10.89	1	2098370	594945	1743187	1200296	377454	92841	338701	185688	40.2	34.9	43.4	34.6	-3.5	0.08	-1.2	0.5	-1.7	0.2	2.9	0.1	2	0.09	-1.5	0.4	0.007
Q$1464	Q61792	LASP1_MOUSE	Lasp1	LIM and SH3 domain protein 1	0.9999	15.97	3	2096011	2204529	2539004	2065068	167618	820347	506148	54219	17.9	83.2	44.6	5.9	1.1	1	1.2	1	-1	1	1.2	1	-1.1	1	-1.2	1	0.9
Q$701	H3BJB6	H3BJB6_MOUSE	Cct8	T-complex protein 1 subunit theta (Fragment)	1	15.48	3	2092502	942710	2631098	2012490	239737	107147	306774	174966	25.6	25.4	26.1	19.4	-2.2	0.009	1.3	0.4	-1	0.8	2.8	0.005	2.1	0.005	-1.3	0.3	0.0005
Q$637	F8WJK8	F8WJK8_MOUSE	St13	Hsc70-interacting protein	1	10.22	3	2089301	1654138	2164896	1821302	101443	124784	156899	172622	10.9	16.9	16.2	21.2	-1.3	0.2	1	0.7	-1.1	0.5	1.3	0.2	1.1	0.7	-1.2	0.5	0.07
Q$986	P24638	PPAL_MOUSE	Acp2	Lysosomal acid phosphatase	0.981	11.11	1	2081860	568642	2483405	1886240	225758	48753	450255	211537	24.2	19.2	40.5	25.1	-3.7	0.01	1.2	0.7	-1.1	0.7	4.4	0.05	3.3	0.01	-1.3	0.6	0.0009
Q$2008	Q9ET30	TM9S3_MOUSE	Tm9sf3	Transmembrane 9 superfamily member 3	0.9996	6.3	2	2080391	917142	2140323	2129741	251560	103743	289910	241840	27	25.3	30.3	25.4	-2.3	0.01	1	1	1	1	2.3	0.02	2.3	0.01	-1	1	0.004
Q$1447	Q61245-2	COBA1_MOUSE	Col11a	Isoform Short of Collagen alpha-1(XI) chain	0.9692	3.43	1	2076650	2612800	2706570	3124165	192960	410069	163863	219740	20.8	35.1	13.5	15.7	1.3	0.6	1.3	0.2	1.5	0.04	1	0.8	1.2	0.6	1.2	0.5	0.08
Q$1328	Q07417	ACADS_MOUSE	Acads	Short-chain specific acyl-CoA dehydrogenase, mitochondrial	1	20.87	6	2065835	1236465	1942485	1820427	130818	46492	156489	140161	14.2	8.4	18	17.2	-1.7	0.002	-1.1	0.8	-1.1	0.6	1.6	0.03	1.5	0.02	-1.1	0.8	0.001
Q$1048	P35762	CD81_MOUSE	Cd81	CD81 antigen	0.995	18.22	2	2057257	3925968	2202502	2122869	197362	2304929	253681	182406	21.5	131.3	25.8	19.2	1.9	1	1.1	1	1	1	-1.8	1	-1.8	1	-1	1	0.6
Q$260	D3Z4X1	D3Z4X1_MOUSE	Pgls	6-phosphogluconolactonase	1	34.48	2	2029517	1535730	2167597	2018404	102352	125882	123683	235237	11.3	18.3	12.8	26.1	-1.3	0.08	1.1	0.8	-1	1	1.4	0.04	1.3	0.4	-1.1	0.8	0.05
Q$1798	Q99KQ4	NAMPT_MOUSE	Nampt	Nicotinamide phosphoribosyltransferase	0.9991	8.35	2	2018617	1398783	2208504	1895897	253119	262670	401589	131067	28	42	40.7	15.5	-1.4	0.6	1.1	0.9	-1.1	0.9	1.6	0.6	1.4	0.6	-1.2	0.9	0.2
Q$2018	Q9JJ28	FLII_MOUSE	Flii	Protein flightless-1 homolog	0.9994	2.99	2	2014427	1560024	4218130	5203720	188278	200513	509024	922303	20.9	28.7	27	39.6	-1.3	0.3	2.1	0.02	2.6	0.07	2.7	0.008	3.3	0.06	1.2	0.4	0.0005
Q$1867	Q9CR61	NDUB7_MOUSE	Ndufb7	NADH dehydrogenase [ubiquinone] 1 beta subcomplex subunit 7	1	32.12	3	2013421	1649295	1884764	1851930	153264	15371	136807	96791	17	2.1	16.2	11.7	-1.2	0.4	-1.1	0.8	-1.1	0.8	1.1	0.5	1.1	0.4	-1	0.8	0.2
Q$1773	Q923D4	SF3B5_MOUSE	Sf3b5	Splicing factor 3B subunit 5	1	45.35	2	2012342	900367	2284661	2138299	151150	121238	268763	143357	16.8	30.1	26.3	15	-2.2	0.002	1.1	0.8	1.1	0.8	2.5	0.006	2.4	0.001	-1.1	0.8	0.0002
Q$26	Q9CQY5-2	MAGT1_MOUSE	Magt	Isoform 2 of Magnesium transporter protein 1	0.9997	6.54	2	2007592	2043156	2229665	2339204	111920	332447	124144	282841	12.5	36.4	12.5	27	1	0.9	1.1	0.8	1.2	0.8	1.1	0.9	1.1	0.9	1	0.9	0.7
Q$117	B1ATJ5	B1ATJ5_MOUSE	Krt32	Keratin, type I cuticular Ha2	1	8.39	4	2007045	1165830	1882358	1740899	111470	62839	195134	256418	12.4	12.1	23.2	32.9	-1.7	0.001	-1.1	0.8	-1.2	0.7	1.6	0.09	1.5	0.3	-1.1	0.8	0.02
Q$1639	Q8BXZ1	TMX3_MOUSE	Tmx3	Protein disulfide-isomerase TMX3	0.9999	6.58	2	2005769	1841558	2363280	2044445	131803	253439	236219	196961	14.7	30.8	22.4	21.5	-1.1	0.9	1.2	0.7	1	0.9	1.3	0.7	1.1	0.9	-1.2	0.8	0.4
Q$1542	Q6WVG3	KCD12_MOUSE	Kctd12	BTB/POZ domain-containing protein KCTD12	0.9985	7.34	2	1997765	1509136	3571981	2611037	196999	319239	773589	461680	22	47.3	48.4	39.5	-1.3	0.5	1.8	0.4	1.3	0.5	2.4	0.2	1.7	0.4	-1.4	0.5	0.05
Q$697	Q9DBG3-2	AP2B1_MOUSE	Ap2b	Isoform 2 of AP-2 complex subunit beta	1	3.68	3	1994972	1097341	2170866	1960264	210561	86087	108540	232227	23.6	17.5	11.2	26.5	-1.8	0.02	1.1	0.8	-1	0.9	2	0.0003	1.8	0.03	-1.1	0.8	0.002
Q$936	P16332	MUTA_MOUSE	Mut	Methylmalonyl-CoA mutase, mitochondrial	0.9776	1.47	1	1993510	799269	2032140	1677870	191055	72102	262145	138193	21.4	20.2	28.8	18.4	-2.5	0.002	1	0.9	-1.2	0.5	2.5	0.03	2.1	0.002	-1.2	0.5	0.0006
Q$1142	P57784	RU2A_MOUSE	Snrpa1	U2 small nuclear ribonucleoprotein A'	1	30.98	5	1983456	1587576	1921408	1804333	127800	53340	128916	116621	14.4	7.5	15	14.5	-1.2	0.1	-1	0.8	-1.1	0.7	1.2	0.2	1.1	0.4	-1.1	0.8	0.1
Q$1106	P50518	VATE1_MOUSE	Atp6v1e1	V-type proton ATPase subunit E 1	1	24.78	3	1981447	1659123	2575482	2100307	177738	156713	284806	63843	20.1	21.1	24.7	6.8	-1.2	0.4	1.3	0.4	1.1	0.5	1.6	0.1	1.3	0.1	-1.2	0.4	0.02
Q$1167	P61620	S61A1_MOUSE	Sec61a1	Protein transport protein Sec61 subunit alpha isoform 1	1	7.98	2	1981060	2137909	1782412	2016341	157270	120523	100753	138972	17.8	12.6	12.6	15.4	1.1	0.8	-1.1	0.8	1	0.9	-1.2	0.3	-1.1	0.8	1.1	0.7	0.3
Q$1779	Q99JI4	PSMD6_MOUSE	Psmd6	26S proteasome non-ATPase regulatory subunit 6	0.9994	7.97	2	1980208	1159346	2383967	1792424	197043	65632	366769	322230	22.3	12.7	34.4	40.2	-1.7	0.03	1.2	0.6	-1.1	0.6	2.1	0.1	1.5	0.4	-1.3	0.6	0.03
Q$636	F8WJG3	F8WJG3_MOUSE	Tra2b	Transformer-2 protein homolog beta	1	19.68	2	1979332	1992026	1997149	2192986	80393	130228	189951	84155	9.1	14.6	21.3	8.6	1	1	1	1	1.1	0.5	1	1	1.1	0.7	1.1	0.8	0.6
Q$956	P18155	MTDC_MOUSE	Mthfd2	Bifunctional methylenetetrahydrofolate dehydrogenase/cyclohydrolase, mitochondrial	1	14.29	2	1978437	1234123	2522633	2240003	84954	196177	304210	330136	9.6	35.5	27	33	-1.6	0.04	1.3	0.4	1.1	0.7	2	0.04	1.8	0.1	-1.1	0.7	0.01
Q$948	P17439	GLCM_MOUSE	Gba	Glucosylceramidase	0.9969	10.1	2	1974740	1201937	2313452	2101895	229916	120976	352472	262926	26	22.5	34.1	28	-1.6	0.08	1.2	0.8	1.1	0.9	1.9	0.08	1.7	0.08	-1.1	0.9	0.04
Q$1813	Q99M28	RNPS1_MOUSE	Rnps1	RNA-binding protein with serine-rich domain 1	1	16.07	3	1965104	1120454	2151720	1901104	196299	126445	192923	219278	22.3	25.2	20	25.8	-1.8	0.03	1.1	0.8	-1	0.8	1.9	0.01	1.7	0.06	-1.1	0.8	0.006
Q$551	E9QAY6	E9QAY6_MOUSE	Immt	Mitochondrial inner membrane protein	1	14.68	5	1957158	759409	810704	770659	1115830	248478	51920	67912	127.5	73.2	14.3	19.7	-2.6	0.9	-2.4	0.9	-2.5	0.9	1.1	1	1	1	-1.1	1	0.4
Q$1494	Q63850	NUP62_MOUSE	Nup62	Nuclear pore glycoprotein p62	0.9913	8.56	2	1953334	1189099	2037471	1854613	224216	77648	187825	238656	25.7	14.6	20.6	28.8	-1.6	0.06	1	0.9	-1.1	0.9	1.7	0.02	1.6	0.1	-1.1	0.9	0.03
Q$2120	S4R281	S4R281_MOUSE	Rpl13a	60S ribosomal protein L13a	1	15.54	2	1952450	1123082	1936349	1792528	89140	26032	165270	185161	10.2	5.2	19.1	23.1	-1.7	0.002	-1	0.9	-1.1	0.8	1.7	0.04	1.6	0.08	-1.1	0.8	0.001
Q$1890	Q9CY58-2	PAIRB_MOUSE	Serbp	Isoform 2 of Plasminogen activator inhibitor 1 RNA-binding protein	1	19.64	6	1949299	1099909	1919927	1737388	152206	93611	155231	164385	17.5	19	18.1	21.2	-1.8	0.009	-1	0.9	-1.1	0.8	1.7	0.01	1.6	0.04	-1.1	0.8	0.002
Q$1723	Q8VDW0-2	DX39A_MOUSE	Ddx39	Isoform 2 of ATP-dependent RNA helicase DDX39A	1	31.87	4	1947500	1182137	1934296	1667941	79698	44989	200124	182734	9.2	8.5	23.1	24.5	-1.6	0.0002	-1	1	-1.2	0.5	1.6	0.09	1.4	0.2	-1.2	0.6	0.005
Q$819	O88544	CSN4_MOUSE	Cops4	COP9 signalosome complex subunit 4	0.9949	8.37	3	1946815	1012288	1820897	1492528	180648	79210	240211	206896	20.7	17.5	29.5	31	-1.9	0.009	-1.1	0.7	-1.3	0.4	1.8	0.06	1.5	0.2	-1.2	0.6	0.01
Q$2027	Q9JMH6-2	TRXR1_MOUSE	Txnrd	Isoform 2 of Thioredoxin reductase 1, cytoplasmic	1	15.63	4	1946542	906207	1995225	1733744	138928	49817	348718	139491	16	12.3	39.1	18	-2.1	0.0006	1	0.9	-1.1	0.7	2.2	0.1	1.9	0.003	-1.2	0.8	0.005
Q$1409	Q5XJY5	COPD_MOUSE	Arcn1	Coatomer subunit delta	0.9997	4.89	2	1944537	893858	2195664	1653495	195630	97920	183210	251310	22.5	24.5	18.7	34	-2.2	0.007	1.1	0.6	-1.2	0.6	2.5	0.001	1.8	0.09	-1.3	0.3	0.001
Q$1592	Q8BGH2	SAM50_MOUSE	Samm50	Sorting and assembly machinery component 50 homolog	0.9949	2.35	1	1932021	1184558	2455570	2240997	151408	134851	548411	750366	17.5	25.5	49.9	74.9	-1.6	0.04	1.3	0.8	1.2	0.9	2.1	0.3	1.9	0.7	-1.1	0.9	0.3
Q$828	O89023	TPP1_MOUSE	Tpp1	Tripeptidyl-peptidase 1	1	6.23	2	1930491	1598941	2765624	2014103	203889	310195	791083	295178	23.6	43.4	64	32.8	-1.2	0.9	1.4	0.9	1	0.9	1.7	0.8	1.3	0.9	-1.4	0.9	0.4
Q$1633	Q8BVE3	VATH_MOUSE	Atp6v1h	V-type proton ATPase subunit H	1	11.8	3	1928204	1305330	1964256	1860698	37898	55241	182483	115310	4.4	9.5	20.8	13.9	-1.5	9e-05	1	0.9	-1	0.9	1.5	0.08	1.4	0.01	-1.1	0.9	0.002
Q$1002	P26955	IL3RB_MOUSE	Csf2rb	Cytokine receptor common subunit beta	1	2.46	2	1915232	1146598	1526121	1655280	134477	275862	220682	181193	15.7	53.8	32.3	24.5	-1.7	0.2	-1.3	0.6	-1.2	0.6	1.3	0.6	1.4	0.6	1.1	0.7	0.1
Q$1509	Q64674	SPEE_MOUSE	Srm	Spermidine synthase	0.9998	12.25	2	1911940	1694231	1759853	1751405	118834	63249	141439	144297	13.9	8.3	18	18.4	-1.1	0.6	-1.1	0.9	-1.1	0.9	1	1	1	1	-1	1	0.6
Q$475	E9PYL2	E9PYL2_MOUSE	Prr12	Protein Prr12	0.9673	1.57	1	1910910	583902	1563149	1515812	194425	78468	240888	264222	22.8	30	34.5	39	-3.3	0.001	-1.2	0.6	-1.3	0.6	2.7	0.02	2.6	0.08	-1	0.9	0.002
Q$1134	P55821	STMN2_MOUSE	Stmn2	Stathmin-2	1	10.61	2	1910523	1250570	1745649	1955907	242308	464874	353439	545276	28.4	83.1	45.3	62.3	-1.5	0.8	-1.1	1	1	1	1.4	0.9	1.6	0.9	1.1	1	0.6
Q$132	B2RPU8	B2RPU8_MOUSE	2410018M08Rik	MCG130675	1	6.75	3	1908201	1151217	1754418	1543220	275652	73985	237862	209766	32.3	14.4	30.3	30.4	-1.7	0.3	-1.1	0.8	-1.2	0.7	1.5	0.3	1.3	0.4	-1.1	0.8	0.1
Q$19	A2A8L1	A2A8L1_MOUSE	Chd5	Protein Chd5	1	2.11	3	1906095	569744	1775027	1447928	268845	112229	297899	232313	31.5	44	37.5	35.9	-3.3	0.01	-1.1	0.8	-1.3	0.5	3.1	0.03	2.5	0.04	-1.2	0.7	0.005
Q$1331	Q07813	BAX_MOUSE	Bax	Apoptosis regulator BAX	0.9828	6.77	1	1904378	986348	1702602	1624348	182431	129904	461236	175872	21.4	29.4	60.6	24.2	-1.9	0.02	-1.1	0.9	-1.2	0.7	1.7	0.6	1.6	0.09	-1	0.9	0.1
Q$1868	Q9CR62	M2OM_MOUSE	Slc25a11	Mitochondrial 2-oxoglutarate/malate carrier protein	1	13.06	3	1888207	1091593	1798700	1749529	96626	116612	164768	68446	11.4	23.9	20.5	8.7	-1.7	0.005	-1	0.9	-1.1	0.6	1.6	0.03	1.6	0.006	-1	0.9	0.0007
Q$831	O89079	COPE_MOUSE	Cope	Coatomer subunit epsilon	0.9999	17.53	3	1886387	893687	1804378	1416985	136716	82411	178411	344661	16.2	20.6	22.1	54.4	-2.1	0.002	-1	0.7	-1.3	0.6	2	0.008	1.6	0.6	-1.3	0.6	0.02
Q$941	P17047-2	LAMP2_MOUSE	Lamp	Isoform LAMP-2B of Lysosome-associated membrane glycoprotein 2	1	7.93	3	1884500	1076509	1468146	1369171	118457	29815	108674	137999	14.1	6.2	16.6	22.5	-1.8	0.01	-1.3	0.1	-1.4	0.1	1.4	0.1	1.3	0.2	-1.1	0.6	0.0007
Q$703	H3BJE0	H3BJE0_MOUSE	Grn	Granulins (Fragment)	1	5.26	1	1883623	1094654	1736687	1639833	139547	154917	113640	131991	16.6	31.6	14.6	18	-1.7	0.03	-1.1	0.7	-1.1	0.6	1.6	0.05	1.5	0.1	-1.1	0.7	0.005
Q$728	J3QK04	J3QK04_MOUSE	Gm7808	MCG67952	1	12.5	1	1877800	1616110	1864060	1683930	116622	159017	159619	72404	13.9	22	19.1	9.6	-1.2	0.7	-1	0.9	-1.1	0.7	1.2	0.8	1	0.9	-1.1	0.8	0.4
Q$496	E9Q132	E9Q132_MOUSE	Rpl24	60S ribosomal protein L24	1	15.79	2	1872160	1143046	1681776	1504463	96304	73480	91170	67810	11.5	14.4	12.1	10.1	-1.6	0.002	-1.1	0.3	-1.2	0.04	1.5	0.009	1.3	0.03	-1.1	0.3	0.0001
Q$721	H7BX22	H7BX22_MOUSE	Ranbp1	Ran-specific GTPase-activating protein	1	28.1	3	1867259	1024866	1681166	1552496	116439	64512	112414	137245	13.9	14.1	15	19.8	-1.8	0.001	-1.1	0.5	-1.2	0.3	1.6	0.005	1.5	0.03	-1.1	0.5	0.0004
Q$49	A2AL49	A2AL49_MOUSE	Agps	Alkyldihydroxyacetonephosphate synthase, peroxisomal	1	14.76	4	1863780	942880	2260471	2254584	181121	98017	339796	191321	21.7	23.2	33.6	19	-2	0.01	1.2	0.6	1.2	0.4	2.4	0.06	2.4	0.002	-1	1	0.002
Q$2057	Q9R112	SQRD_MOUSE	Sqrdl	Sulfide:quinone oxidoreductase, mitochondrial	1	11.11	4	1860815	1379626	1787443	1675596	54746	52165	107525	190044	6.6	8.5	13.5	25.4	-1.3	0.001	-1	0.8	-1.1	0.8	1.3	0.05	1.2	0.6	-1.1	0.8	0.05
Q$1166	P61514	RL37A_MOUSE	Rpl37a	60S ribosomal protein L37a	0.9956	32.61	2	1860774	1394107	1840764	1778843	542320	274807	239790	356775	65.2	44.1	29.1	44.8	-1.3	0.9	-1	1	-1	1	1.3	0.8	1.3	0.9	-1	1	0.8
Q$557	P57776-3	EF1D_MOUSE	Eef1	Isoform 3 of Elongation factor 1-delta	1	14.24	6	1860027	780140	1647975	1353658	91917	43731	168473	135015	11	12.5	22.9	22.3	-2.4	3e-05	-1.1	0.4	-1.4	0.04	2.1	0.02	1.7	0.02	-1.2	0.4	6e-05
Q$966	P20060	HEXB_MOUSE	Hexb	Beta-hexosaminidase subunit beta	0.9886	7.84	2	1844506	1600158	1453018	1535015	112778	694940	171761	154162	13.7	97.1	26.4	22.5	-1.2	1	-1.3	0.4	-1.2	0.5	-1.1	1	-1	1	1.1	1	0.9
Q$41	A2AGN7	A2AGN7_MOUSE	Psmc3	26S protease regulatory subunit 6A	1	28.25	7	1843585	1320645	2009739	1664181	76482	48170	123025	132196	9.3	8.2	13.7	17.8	-1.4	0.002	1.1	0.5	-1.1	0.5	1.5	0.004	1.3	0.2	-1.2	0.3	0.001
Q$1919	Q9D172	ES1_MOUSE	D10Jhu81e	ES1 protein homolog, mitochondrial	0.9994	15.04	2	1834714	1652687	1802338	1840766	83311	28861	109704	142105	10.2	3.9	13.6	17.3	-1.1	0.4	-1	1	1	1	1.1	0.8	1.1	0.8	1	1	0.5
Q$1017	P29416	HEXA_MOUSE	Hexa	Beta-hexosaminidase subunit alpha	0.9359	2.08	1	1834150	892772	1266734	1181481	232256	70115	210671	102828	28.3	17.6	37.2	19.5	-2.1	0.08	-1.4	0.3	-1.6	0.2	1.4	0.3	1.3	0.2	-1.1	0.7	0.009
Q$1544	Q6ZQI3	MLEC_MOUSE	Mlec	Malectin	1	16.49	3	1826969	930994	1761519	1700889	324324	110995	291906	235766	39.7	26.7	37.1	31	-2	0.1	-1	1	-1.1	1	1.9	0.1	1.8	0.1	-1	1	0.08
Q$39	A2AG39	A2AG39_MOUSE	Stoml2	Stomatin-like protein 2, mitochondrial (Fragment)	1	11.54	2	1821764	750352	1952072	2169194	262264	66041	136340	380772	32.2	19.7	15.6	39.3	-2.4	0.06	1.1	0.9	1.2	0.9	2.6	0.0003	2.9	0.07	1.1	0.9	0.004
Q$247	D3Z315	D3Z315_MOUSE	Cope	Coatomer subunit epsilon (Fragment)	0.9999	14.98	2	1815376	845003	1728852	1361121	134482	78124	182295	341002	16.6	20.7	23.6	56	-2.1	0.001	-1.1	0.7	-1.3	0.6	2	0.01	1.6	0.6	-1.3	0.6	0.02
Q$702	H3BJC1	H3BJC1_MOUSE	Acaa1a	3-ketoacyl-CoA thiolase A, peroxisomal (Fragment)	1	35.71	2	1810474	771088	1574236	1367411	80422	12616	133202	160208	9.9	3.7	18.9	26.2	-2.3	0.001	-1.2	0.3	-1.3	0.1	2	0.02	1.8	0.08	-1.2	0.3	5e-05
Q$2105	Q9Z2I9	SUCB1_MOUSE	Sucla2	Succinyl-CoA ligase [ADP-forming] subunit beta, mitochondrial	0.9996	4.75	2	1809828	950416	2379669	2041522	82271	147988	342748	256332	10.2	34.8	32.2	28.1	-1.9	0.006	1.3	0.4	1.1	0.7	2.5	0.02	2.1	0.02	-1.2	0.7	0.003
Q$208	D3YYF6	D3YYF6_MOUSE	Cnbp	Cellular nucleic acid-binding protein	1	19.42	2	1808292	1941890	1967480	1898955	470147	321182	384444	276327	58.1	37	43.7	32.5	1.1	1	1.1	1	1.1	1	1	1	-1	1	-1	1	1
Q$1375	Q3UHD9-2	AGAP2_MOUSE	Agap	Isoform 2 of Arf-GAP with GTPase, ANK repeat and PH domain-containing protein 2	0.9674	6.52	2	1798742	1149407	1343688	1648917	143893	158521	73769	125418	17.9	30.8	12.3	17	-1.6	0.09	-1.3	0.1	-1.1	0.5	1.2	0.5	1.4	0.1	1.2	0.2	0.01
Q$2076	Q9WUM4	COR1C_MOUSE	Coro1c	Coronin-1C	1	10.34	2	1795036	564348	1560437	1338403	199173	40898	205670	258774	24.8	16.2	29.5	43.2	-3.2	0.02	-1.2	0.7	-1.3	0.5	2.8	0.04	2.4	0.1	-1.2	0.7	0.002
Q$822	O88587-2	COMT_MOUSE	Com	Isoform Soluble of Catechol O-methyltransferase	0.9946	5.86	1	1782140	602212	1886375	1570765	88530	125819	326318	234781	11.1	46.7	38.7	33.4	-3	0.0004	1.1	0.8	-1.1	0.8	3.1	0.03	2.6	0.03	-1.2	0.8	0.002
Q$1294	P97449	AMPN_MOUSE	Anpep	Aminopeptidase N	1	5.59	4	1780739	1146295	1855820	1548293	115723	43341	220062	149425	14.5	8.5	26.5	21.6	-1.6	0.005	1	0.8	-1.2	0.6	1.6	0.1	1.4	0.2	-1.2	0.6	0.02
Q$1261	P70441	NHRF1_MOUSE	Slc9a3r1	Na(+)/H(+) exchange regulatory cofactor NHE-RF1	1	7.04	2	1775934	1340100	1662348	1637590	108217	128522	75096	92847	13.6	21.4	10.1	12.7	-1.3	0.2	-1.1	0.7	-1.1	0.7	1.2	0.3	1.2	0.3	-1	0.8	0.05
Q$1349	Q3TLP8	Q3TLP8_MOUSE	Rac1	RAS-related C3 botulinum substrate 1, isoform CRA_a	1	11.85	3	1768323	981438	1819511	1685735	73440	120158	150531	178440	9.3	27.4	18.5	23.7	-1.8	0.003	1	0.9	-1	0.9	1.9	0.01	1.7	0.04	-1.1	0.9	0.002
Q$494	E9Q0X0	E9Q0X0_MOUSE	Psma4	Proteasome subunit alpha type (Fragment)	1	23.02	2	1767381	1292167	1654179	1556882	165592	167729	244153	135804	21	29	33	19.5	-1.4	0.4	-1.1	0.9	-1.1	0.8	1.3	0.8	1.2	0.8	-1.1	0.9	0.3
Q$220	D3YZX3	D3YZX3_MOUSE	Gnb2	Guanine nucleotide-binding protein G(I)/G(S)/G(T) subunit beta-2	1	51.69	10	1767242	1016943	1596239	1411291	140709	59547	160330	138268	17.8	13.1	22.5	21.9	-1.7	0.007	-1.1	0.6	-1.3	0.3	1.6	0.05	1.4	0.1	-1.1	0.6	0.006
Q$200	D3YXT0	D3YXT0_MOUSE	Ndufs2	NADH dehydrogenase [ubiquinone] iron-sulfur protein 2, mitochondrial	1	16.93	5	1763267	2473239	3492597	2476780	154379	632567	1236490	637653	19.6	57.2	79.2	57.6	1.4	0.9	2	0.8	1.4	0.9	1.4	0.9	1	1	-1.4	0.9	0.5
Q$229	D3Z0S1	D3Z0S1_MOUSE	Anxa4	Annexin (Fragment)	1	44.88	8	1762350	910360	1782174	1513140	160545	58811	163722	113924	20.4	14.4	20.5	16.8	-1.9	0.006	1	0.9	-1.2	0.5	2	0.006	1.7	0.006	-1.2	0.5	0.0007
Q$592	F6WR45	F6WR45_MOUSE	Chd4	Chromodomain-helicase-DNA-binding protein 4 (Fragment)	1	7.21	2	1753208	536227	1576829	1305300	241673	109949	273486	217278	30.8	45.8	38.8	37.2	-3.3	0.01	-1.1	0.7	-1.3	0.5	2.9	0.04	2.4	0.05	-1.2	0.7	0.006
Q$1062	P41105	RL28_MOUSE	Rpl28	60S ribosomal protein L28	0.9986	14.6	2	1745372	751758	1778014	1453455	141337	121241	97352	228083	18.1	36.1	12.2	35.1	-2.3	0.003	1	0.9	-1.2	0.5	2.4	0.001	1.9	0.1	-1.2	0.5	0.0008
Q$1616	Q8BL97-2	SRSF7_MOUSE	Srsf	Isoform 2 of Serine/arginine-rich splicing factor 7	1	12.61	3	1742293	1315244	2313662	2195514	139217	134416	277109	185156	17.9	22.9	26.8	18.9	-1.3	0.2	1.3	0.2	1.3	0.2	1.8	0.06	1.7	0.03	-1.1	0.7	0.008
Q$1514	Q69ZN7-4	MYOF_MOUSE	Myo	Isoform 4 of Myoferlin	1	4.33	6	1741591	936794	1496591	1318712	224098	56291	233456	100604	28.8	13.4	34.9	17.1	-1.9	0.1	-1.2	0.7	-1.3	0.3	1.6	0.3	1.4	0.06	-1.1	0.7	0.03
Q$881	P09065	HME1_MOUSE	En1	Homeobox protein engrailed-1	0.9891	15.96	1	1733680	1615379	2176090	1801781	191979	390290	214927	287995	24.8	54	22.1	35.7	-1.1	1	1.3	0.7	1	1	1.3	0.8	1.1	1	-1.2	0.8	0.5
Q$437	E0CXZ0	E0CXZ0_MOUSE	Nop56	Nucleolar protein 56	1	24.14	3	1732609	860868	1868980	1584972	169897	47553	181370	204624	21.9	12.4	21.7	28.9	-2	0.03	1.1	0.8	-1.1	0.8	2.2	0.02	1.8	0.09	-1.2	0.7	0.002
Q$1406	Q5SX46	Q5SX46_MOUSE	Slc25a11	Mitochondrial 2-oxoglutarate/malate carrier protein (Fragment)	1	12.44	2	1723141	964175	1623718	1566946	94283	117608	157955	62626	12.2	27.3	21.8	8.9	-1.8	0.006	-1.1	0.8	-1.1	0.5	1.7	0.04	1.6	0.01	-1	0.8	0.0009
Q$1820	Q99P58	RB27B_MOUSE	Rab27b	Ras-related protein Rab-27B	1	10.55	3	1721240	842248	2475884	2763128	225404	89569	228713	375091	29.3	23.8	20.7	30.4	-2	0.03	1.4	0.1	1.6	0.1	2.9	0.001	3.3	0.03	1.1	0.5	0.0003
Q$1573	Q80WS3	FBLL1_MOUSE	Fbll1	rRNA/tRNA 2'-O-methyltransferase fibrillarin-like protein 1	1	3.5	1	1719570	954388	1620745	1680120	134318	150854	322932	254504	17.5	35.3	44.6	33.9	-1.8	0.03	-1.1	1	-1	1	1.7	0.3	1.8	0.2	1	1	0.1
Q$2041	Q9QYB1	CLIC4_MOUSE	Clic4	Chloride intracellular channel protein 4	1	9.88	2	1712938	1321366	1824210	1836108	107593	33119	133993	164476	14	5.6	16.4	20	-1.3	0.1	1.1	0.9	1.1	0.9	1.4	0.1	1.4	0.1	1	1	0.03
Q$197	D3YXK2	SAFB1_MOUSE	Safb	Scaffold attachment factor B1	0.9717	4.38	2	1711886	637343	1583935	1372532	173670	40181	202110	192638	22.7	14.1	28.5	31.4	-2.7	0.02	-1.1	0.7	-1.2	0.5	2.5	0.04	2.2	0.07	-1.2	0.7	0.001
Q$1369	Q3UE92	Q3UE92_MOUSE	Xpnpep1	X-prolyl aminopeptidase (Aminopeptidase P) 1, soluble, isoform CRA_b	1	8.71	4	1694062	931267	1613635	1561678	193724	51455	197128	298760	25.6	12.4	27.3	42.8	-1.8	0.09	-1	1	-1.1	1	1.7	0.1	1.7	0.4	-1	1	0.07
Q$135	B2RUF0	B2RUF0_MOUSE	Ybx2	Y box protein 2	1	22.84	2	1687547	738435	1452270	1280093	183344	55010	174072	148565	24.3	16.7	26.8	26	-2.3	0.03	-1.2	0.6	-1.3	0.3	2	0.05	1.7	0.04	-1.1	0.6	0.003
Q$1343	Q3TEA8-2	HP1B3_MOUSE	Hp1bp	Isoform 2 of Heterochromatin protein 1-binding protein 3	1	12.94	5	1684906	1004507	1904196	1747575	134861	120818	188405	171217	17.9	26.9	22.1	21.9	-1.7	0.03	1.1	0.8	1	0.8	1.9	0.02	1.7	0.03	-1.1	0.8	0.004
Q$1830	Q9CPQ3	TOM22_MOUSE	Tomm22	Mitochondrial import receptor subunit TOM22 homolog	1	25.35	2	1684638	1401169	1759759	1734102	82713	65531	141281	142359	11	10.5	18	18.4	-1.2	0.2	1	1	1	1	1.3	0.2	1.2	0.2	-1	1	0.1
Q$1253	P70288	HDAC2_MOUSE	Hdac2	Histone deacetylase 2	1	4.92	2	1683911	1028464	2167180	1716590	139293	83703	220099	124540	18.5	18.2	22.7	16.2	-1.6	0.01	1.3	0.3	1	0.9	2.1	0.008	1.7	0.009	-1.3	0.3	0.0007
Q$2060	Q9R1P1	PSB3_MOUSE	Psmb3	Proteasome subunit beta type-3	1	32.68	4	1677891	1453578	1660372	1593329	66167	41770	74813	94323	8.8	6.4	10.1	13.2	-1.2	0.1	-1	0.9	-1.1	0.9	1.1	0.2	1.1	0.6	-1	0.9	0.2
Q$1975	Q9DC61	MPPA_MOUSE	Pmpca	Mitochondrial-processing peptidase subunit alpha	1	15.27	3	1667027	740856	1513053	1390018	159459	58240	243795	207645	21.4	17.6	36	33.4	-2.3	0.004	-1.1	0.8	-1.2	0.7	2	0.1	1.9	0.1	-1.1	0.8	0.01
Q$1583	Q812F8	MGT4B_MOUSE	Mgat4b	Alpha-1,3-mannosyl-glycoprotein 4-beta-N-acetylglucosaminyltransferase B	0.9104	3.28	1	1665390	2462361	2679605	1653193	162236	972245	484702	190584	21.8	88.3	40.4	25.8	1.5	0.9	1.6	0.4	-1	1	1.1	1	-1.5	0.9	-1.6	0.4	0.5
Q$1488	Q62433	NDRG1_MOUSE	Ndrg1	Protein NDRG1	1	15.74	4	1664419	1371398	1656877	1604514	136826	80113	60561	88630	18.4	13.1	8.2	12.4	-1.2	0.4	-1	1	-1	1	1.2	0.1	1.2	0.4	-1	1	0.1
Q$2104	Q9Z2I8-2	SUCB2_MOUSE	Suclg	Isoform 2 of Succinyl-CoA ligase [GDP-forming] subunit beta, mitochondrial	1	9.38	3	1661327	953796	1673788	1612403	219810	64657	136740	239961	29.6	15.2	18.3	33.3	-1.7	0.1	1	1	-1	1	1.8	0.009	1.7	0.2	-1	1	0.03
Q$433	E0CXB1	E0CXB1_MOUSE	Psma6	Proteasome subunit alpha type-6	1	31.28	3	1659523	819994	1215428	1232477	402137	65662	128476	131843	54.2	17.9	23.6	23.9	-2	0.4	-1.4	0.7	-1.3	0.7	1.5	0.1	1.5	0.1	1	0.9	0.1
Q$1740	Q91W50	CSDE1_MOUSE	Csde1	Cold shock domain-containing protein E1	1	4.51	3	1659189	1286755	1627868	1523272	95365	63350	85229	109781	12.9	11	11.7	16.1	-1.3	0.07	-1	0.8	-1.1	0.8	1.3	0.07	1.2	0.3	-1.1	0.8	0.04
Q$524	E9Q5B6	E9Q5B6_MOUSE	Hnrnpd	Heterogeneous nuclear ribonucleoprotein D0 (Fragment)	1	47.66	4	1656144	911077	1578289	1404665	90835	33016	166497	168932	12.3	8.1	23.6	26.9	-1.8	0.0003	-1	0.7	-1.2	0.5	1.7	0.07	1.5	0.2	-1.1	0.7	0.004
Q$96	A4QPC5	A4QPC5_MOUSE	Cma1	Chymase	1	15	3	1651904	576232	1275998	1325894	233466	70022	246134	203729	31.6	27.2	43.1	34.4	-2.9	0.05	-1.3	0.7	-1.2	0.7	2.2	0.2	2.3	0.05	1	0.9	0.01
Q$833	O89110	CASP8_MOUSE	Casp8	Caspase-8	0.9455	2.5	1	1651645	622187	1809850	1548440	155460	72873	199326	260561	21	26.2	24.6	37.6	-2.7	0.002	1.1	0.8	-1.1	0.8	2.9	0.003	2.5	0.08	-1.2	0.8	0.001
Q$818	O88531	PPT1_MOUSE	Ppt1	Palmitoyl-protein thioesterase 1	1	10.78	2	1651079	1593850	1643553	1503981	45342	44435	96992	138076	6.1	6.2	13.2	20.5	-1	0.9	-1	0.9	-1.1	0.9	1	0.9	-1.1	0.9	-1.1	0.9	0.6
Q$1835	Q9CPV4-3	GLOD4_MOUSE	Glod	Isoform 3 of Glyoxalase domain-containing protein 4	1	23.66	5	1650292	1118609	1706012	1511257	90741	29013	167925	144556	12.3	5.8	22	21.4	-1.5	0.02	1	0.8	-1.1	0.8	1.5	0.1	1.4	0.2	-1.1	0.8	0.01
Q$430	E0CX19	E0CX19_MOUSE	Hibch	3-hydroxyisobutyryl-CoA hydrolase, mitochondrial	0.9947	11.58	2	1645101	1203622	1716236	1457416	257626	134277	270701	175725	35	24.9	35.3	27	-1.4	0.6	1	0.9	-1.1	0.8	1.4	0.6	1.2	0.7	-1.2	0.8	0.4
Q$1015	P29387	GBB4_MOUSE	Gnb4	Guanine nucleotide-binding protein subunit beta-4	1	3.53	1	1644650	1214034	1710760	1465441	128836	606839	144703	233342	17.5	111.8	18.9	35.6	-1.4	1	1	1	-1.1	1	1.4	1	1.2	1	-1.2	1	0.7
Q$111	P50544	ACADV_MOUSE	Acadvl	Very long-chain specific acyl-CoA dehydrogenase, mitochondrial	1	16.16	5	1629088	1030230	1605842	1464246	136133	21910	146712	88133	18.7	4.8	20.4	13.5	-1.6	0.05	-1	0.9	-1.1	0.7	1.6	0.06	1.4	0.04	-1.1	0.7	0.005
Q$998	P26516	PSMD7_MOUSE	Psmd7	26S proteasome non-ATPase regulatory subunit 7	1	15.26	3	1611219	1107952	1470798	1305220	226571	36573	223833	173034	31.4	7.4	34	29.6	-1.5	0.4	-1.1	0.8	-1.2	0.8	1.3	0.6	1.2	0.8	-1.1	0.8	0.3
Q$614	F7B227	F7B227_MOUSE	Ech1	Delta(3,5)-Delta(2,4)-dienoyl-CoA isomerase, mitochondrial (Fragment)	1	20.9	2	1606322	654371	1265322	1177482	125764	59197	116470	152915	17.5	20.2	20.6	29	-2.5	0.0008	-1.3	0.2	-1.4	0.2	1.9	0.008	1.8	0.05	-1.1	0.7	0.0004
Q$574	F6T930	F6T930_MOUSE	Echs1	Enoyl-CoA hydratase, mitochondrial (Fragment)	1	5.76	1	1601730	656289	1342540	1287640	215845	37277	63076	153352	30.1	12.7	10.5	26.6	-2.4	0.05	-1.2	0.6	-1.2	0.6	2	8e-05	2	0.05	-1	0.7	0.001
Q$1273	P83882	RL36A_MOUSE	Rpl36a	60S ribosomal protein L36a	0.9688	8.49	1	1592787	3656953	2092720	1590937	244683	2647054	295777	242696	34.4	161.9	31.6	34.1	2.3	0.9	1.3	0.8	-1	1	-1.7	0.9	-2.3	0.9	-1.3	0.8	0.7
Q$250	D3Z3X4	D3Z3X4_MOUSE	Cisd2	CDGSH iron-sulfur domain-containing protein 2	1	31.48	3	1592612	1157344	1473086	1581574	74568	53049	111263	48691	10.5	10.2	16.9	6.9	-1.4	0.007	-1.1	0.8	-1	0.9	1.3	0.1	1.4	0.002	1.1	0.8	0.003
Q$100	A8XU21	A8XU21_MOUSE	Ncf4	Neutrophil cytosol factor 4 (Fragment)	1	10	2	1589730	1327336	1654894	1522174	66832	47911	148964	99669	9.4	8.1	20.1	14.6	-1.2	0.07	1	0.9	-1	0.9	1.2	0.4	1.1	0.4	-1.1	0.9	0.1
Q$1290	P97384	ANX11_MOUSE	Anxa11	Annexin A11	1	5.37	2	1587057	919404	1410978	1245843	260248	59699	146576	122954	36.7	14.5	23.2	22.1	-1.7	0.2	-1.1	0.7	-1.3	0.6	1.5	0.08	1.4	0.2	-1.1	0.7	0.06
Q$1508	Q64669	NQO1_MOUSE	Nqo1	NAD(P)H dehydrogenase [quinone] 1	0.9999	7.66	3	1577401	916740	1815722	2318722	87666	77113	112578	313678	12.4	18.8	13.9	30.2	-1.7	0.002	1.2	0.2	1.5	0.2	2	0.001	2.5	0.04	1.3	0.2	0.0004
Q$530	E9Q6R3	E9Q6R3_MOUSE	Sec22b	Vesicle-trafficking protein SEC22b	1	26.51	3	1576815	708073	1749572	1686012	199958	75894	337411	259461	28.4	24	43.1	34.4	-2.2	0.02	1.1	1	1.1	1	2.5	0.1	2.4	0.08	-1	1	0.02
Q$782	O35465-2	FKBP8_MOUSE	Fkbp	Isoform 2 of Peptidyl-prolyl cis-trans isomerase FKBP8	1	14.39	4	1576224	1161278	1724708	1586256	88954	54061	111360	138921	12.6	10.4	14.4	19.6	-1.4	0.02	1.1	0.7	1	1	1.5	0.01	1.4	0.08	-1.1	0.7	0.008
Q$509	E9Q3E2	E9Q3E2_MOUSE	Synpo	Synaptopodin	0.9528	0.82	1	1572625	2122505	2056325	1464555	97301	407795	581968	402924	13.8	43	63.3	61.5	1.3	0.8	1.3	0.9	-1.1	1	-1	1	-1.4	0.8	-1.4	0.9	0.6
Q$1377	Q3UHX2	HAP28_MOUSE	Pdap1	28 kDa heat- and acid-stable phosphoprotein	0.9764	8.84	1	1563720	804640	1189368	1026245	85246	67770	146719	169536	12.2	18.8	27.6	36.9	-1.9	0.0007	-1.3	0.2	-1.5	0.1	1.5	0.2	1.3	0.5	-1.2	0.5	0.004
Q$1373	Q9JII5-2	DAZP1_MOUSE	Dazap	Isoform 2 of DAZ-associated protein 1	1	12.84	3	1563610	722201	1688744	1394021	142722	52031	175444	194413	20.4	16.1	23.2	31.2	-2.2	0.003	1.1	0.8	-1.1	0.8	2.3	0.02	1.9	0.09	-1.2	0.6	0.002
Q$139	B7FAU6	B7FAU6_MOUSE	Rpl10	60S ribosomal protein L10 (Fragment)	1	17.37	3	1553313	795116	1313096	954543	581694	245818	398282	91593	83.7	69.1	67.8	21.5	-2	0.8	-1.2	0.8	-1.6	0.8	1.7	0.8	1.2	0.8	-1.4	0.8	0.5
Q$156	D3YTQ8	D3YTQ8_MOUSE	Ndufa5	NADH dehydrogenase (Ubiquinone) 1 alpha subcomplex, 5, isoform CRA_a	1	33.77	2	1550457	1339203	1698610	1549302	162833	203721	195033	231415	23.5	34	25.7	33.4	-1.2	0.9	1.1	0.9	-1	1	1.3	0.8	1.2	0.9	-1.1	0.9	0.7
Q$924	P14576	SRP54_MOUSE	Srp54	Signal recognition particle 54 kDa protein	0.909	2.18	1	1539928	2000277	2272222	810967	430568	914132	1035411	124168	62.5	102.2	101.9	34.2	1.3	0.9	1.5	0.9	-1.9	0.7	1.1	0.9	-2.5	0.7	-2.8	0.7	0.5
Q$1600	Q8BH80	Q8BH80_MOUSE	Vapb	Vesicle-associated membrane protein, associated protein B and C	0.9887	4.94	1	1536615	417723	1291830	924678	255993	68348	215866	194963	37.3	36.6	37.4	47.1	-3.7	0.06	-1.2	0.5	-1.7	0.3	3.1	0.06	2.2	0.1	-1.4	0.4	0.006
Q$1927	Q9D1P4	CHRD1_MOUSE	Chordc1	Cysteine and histidine-rich domain-containing protein 1	0.9227	4.53	1	1519020	902603	1504640	1349362	144939	105514	199315	99325	21.3	26.1	29.6	16.5	-1.7	0.05	-1	1	-1.1	0.7	1.7	0.1	1.5	0.07	-1.1	0.8	0.03
Q$2056	Q9R111	GUAD_MOUSE	Gda	Guanine deaminase	1	11.67	3	1516902	1044733	1514373	1315315	93301	38044	118653	109983	13.8	8.1	17.5	18.7	-1.5	0.009	-1	1	-1.2	0.5	1.4	0.07	1.3	0.2	-1.2	0.5	0.009
Q$758	O08756	HCD2_MOUSE	Hsd17b10	3-hydroxyacyl-CoA dehydrogenase type-2	1	17.62	4	1514799	681883	1646226	1562378	168559	35812	279222	157980	24.9	11.7	37.9	22.6	-2.2	0.03	1.1	1	1	1	2.4	0.1	2.3	0.02	-1.1	1	0.006
Q$160	D3YU45	D3YU45_MOUSE	Gm3940	Protein Gm3940	1	6.29	1	1511073	960420	1775258	898040	957782	426420	889261	228138	141.7	99.3	112	56.8	-1.6	1	1.2	1	-1.7	1	1.8	0.9	-1.1	1	-2	0.9	0.8
Q$1905	Q9CZX9	EMC4_MOUSE	Emc4	ER membrane protein complex subunit 4	0.906	7.1	1	1507600	597520	1055095	944734	65691	40686	119897	98296	9.7	15.2	25.4	23.3	-2.5	1e-05	-1.4	0.03	-1.6	0.007	1.8	0.03	1.6	0.03	-1.1	0.5	2e-05
Q$80	A2BE92	A2BE92_MOUSE	Set	Protein SET (Fragment)	1	37.09	4	1505871	1200523	1577319	1658290	133882	174391	181189	171459	19.9	32.5	25.7	23.1	-1.3	0.6	1	0.9	1.1	0.9	1.3	0.6	1.4	0.5	1.1	0.9	0.3
Q$1760	Q921L3	TMCO1_MOUSE	Tmco1	Transmembrane and coiled-coil domain-containing protein 1	0.959	7.98	1	1503971	707121	1470764	1362108	105466	140243	198876	183457	15.7	44.3	30.2	30.1	-2.1	0.01	-1	0.9	-1.1	0.9	2.1	0.07	1.9	0.08	-1.1	0.9	0.009
Q$2025	Q9JLI2	Q9JLI2_MOUSE	Col5a3	Collagen type V alpha 3 chain	0.9984	3.74	2	1501637	2894021	1639274	1603944	76843	567566	248354	101086	11.4	43.9	33.9	14.1	1.9	0.4	1.1	0.9	1.1	0.8	-1.8	0.4	-1.8	0.4	-1	0.9	0.02
Q$1751	Q91YR7-2	PRP6_MOUSE	Prpf	Isoform 2 of Pre-mRNA-processing factor 6	1	6.84	3	1496491	867365	2408912	1756693	261040	153382	317171	123608	39	39.5	29.4	15.7	-1.7	0.2	1.6	0.2	1.2	0.4	2.8	0.01	2	0.01	-1.4	0.2	0.002
Q$1680	Q8K209	GPR56_MOUSE	Gpr56	G-protein coupled receptor 56	0.9996	3.49	2	1495778	775802	2086441	1351537	273593	26818	410316	346410	40.9	7.7	44	57.3	-1.9	0.3	1.4	0.5	-1.1	0.8	2.7	0.2	1.7	0.5	-1.5	0.5	0.05
Q$714	H3BKR2	H3BKR2_MOUSE	Gnb1	Guanine nucleotide-binding protein G(I)/G(S)/G(T) subunit beta-1 (Fragment)	1	15.33	3	1495061	744747	1382416	1291959	110329	36424	105039	85680	16.5	10.9	17	14.8	-2	0.001	-1.1	0.7	-1.2	0.5	1.9	0.002	1.7	0.002	-1.1	0.7	0.0001
Q$659	G3UXY0	G3UXY0_MOUSE	Psme1	Proteasome activator complex subunit 1	1	11.95	2	1487831	605965	630820	724455	108644	90758	89615	50883	16.3	33.5	31.8	15.7	-2.5	0.001	-2.4	0.001	-2.1	0.001	1	0.9	1.2	0.6	1.1	0.6	5e-06
Q$2087	Q9WVK4	EHD1_MOUSE	Ehd1	EH domain-containing protein 1	1	11.61	3	1476620	1170769	1937298	1661190	105178	69440	302134	150921	15.9	13.3	34.9	20.3	-1.3	0.2	1.3	0.5	1.1	0.6	1.7	0.2	1.4	0.1	-1.2	0.6	0.05
Q$1871	Q9CRC8	LRC40_MOUSE	Lrrc40	Leucine-rich repeat-containing protein 40	0.964	1.16	1	1474701	14167516	1535153	4737419	385775	6487846	402904	3730034	58.5	102.4	58.7	176.1	9.6	0.5	1	0.9	3.2	0.8	-9.2	0.5	-3	0.7	3.1	0.8	0.09
Q$1124	P53996-2	CNBP_MOUSE	Cnb	Isoform 2 of Cellular nucleic acid-binding protein	1	7.06	2	1472122	888875	1193646	1229607	453314	68691	140904	120303	68.9	17.3	26.4	21.9	-1.7	0.7	-1.2	0.9	-1.2	0.9	1.3	0.4	1.4	0.2	1	0.9	0.4
Q$1412	Q60604-2	ADSV_MOUSE	Sci	Isoform 2 of Adseverin	1	4.39	2	1470477	799448	1371116	1310304	197268	38024	123509	201706	30	10.6	20.1	34.4	-1.8	0.1	-1.1	0.9	-1.1	0.9	1.7	0.05	1.6	0.2	-1	0.9	0.03
Q$1083	P47791-2	GSHR_MOUSE	Gs	Isoform Cytoplasmic of Glutathione reductase, mitochondrial	0.9997	9.28	2	1469649	837962	1434494	1268489	111618	26678	91964	54285	17	7.1	14.3	9.6	-1.8	0.02	-1	0.8	-1.2	0.4	1.7	0.01	1.5	0.0006	-1.1	0.4	0.0001
Q$518	E9Q4F4	E9Q4F4_MOUSE	Snrpe	Small nuclear ribonucleoprotein E	1	52.75	3	1469580	1209904	1607209	1557082	162315	96513	234415	214911	24.7	17.8	32.6	30.9	-1.2	0.6	1.1	1	1.1	1	1.3	0.6	1.3	0.6	-1	1	0.5
Q$829	O89051	ITM2B_MOUSE	Itm2b	Integral membrane protein 2B	0.9997	4.51	2	1468369	730805	1417731	1188875	177163	71042	252168	344735	27	21.7	39.8	64.8	-2	0.03	-1	0.9	-1.2	0.9	1.9	0.2	1.6	0.7	-1.2	0.9	0.1
Q$1768	Q922W5	P5CR1_MOUSE	Pycr1	Pyrroline-5-carboxylate reductase 1, mitochondrial	1	11	3	1465595	848372	1647332	1380736	119866	30668	118491	110291	18.3	8.1	16.1	17.9	-1.7	0.03	1.1	0.5	-1.1	0.6	1.9	0.01	1.6	0.03	-1.2	0.4	0.0003
Q$193	Q8BX46-2	SKOR1_MOUSE	Skor	Isoform 2 of SKI family transcriptional corepressor 1	0.9795	9.72	2	1464504	1527535	1502472	1514051	105098	91416	61580	85437	16	13.4	9.2	12.6	1	1	1	1	1	1	-1	1	-1	1	1	1	1
Q$1444	Q923F1	Q923F1_MOUSE	Clns1a	Chloride channel, nucleotide-sensitive, 1A	0.9729	5.39	1	1460220	350315	1323836	1112951	234166	84886	359567	335604	35.9	54.2	60.7	67.4	-4.2	0.01	-1.1	0.9	-1.3	0.8	3.8	0.2	3.2	0.3	-1.2	0.9	0.05
Q$2121	S4R2M6	S4R2M6_MOUSE	Rbm3	MCG116386, isoform CRA_c	1	55.56	4	1450518	918070	1220644	1211290	104270	83389	119748	116126	16.1	20.3	21.9	21.4	-1.6	0.02	-1.2	0.4	-1.2	0.4	1.3	0.3	1.3	0.3	-1	1	0.02
Q$2072	Q9WUA2	SYFB_MOUSE	Farsb	Phenylalanine--tRNA ligase beta subunit	0.9343	1.87	1	1447523	2399028	2031589	2259997	110105	1144845	393364	842521	17	106.7	43.3	83.4	1.7	0.9	1.4	0.8	1.6	0.9	-1.2	1	-1.1	1	1.1	1	0.8
Q$678	G3X919	G3X919_MOUSE	Tbx18	T-box transcription factor TBX18	0.9259	1.79	1	1441949	583016	1220193	1345320	779009	98138	429802	634438	120.8	37.6	78.8	105.5	-2.5	0.8	-1.2	1	-1.1	1	2.1	0.8	2.3	0.8	1.1	1	0.7
Q$549	E9QAT6	E9QAT6_MOUSE	Cad	DNA fragmentation factor subunit beta	1	6.69	4	1432279	994563	1537715	1445018	83722	76371	133497	143953	13.1	17.2	19.4	22.3	-1.4	0.03	1.1	0.9	1	0.9	1.5	0.04	1.5	0.09	-1.1	0.9	0.02
Q$906	P11672	NGAL_MOUSE	Lcn2	Neutrophil gelatinase-associated lipocalin	0.9668	6.5	1	1427170	1137227	1491146	1376591	56796	139850	81892	101091	8.9	27.5	12.3	16.4	-1.3	0.4	1	0.8	-1	0.8	1.3	0.3	1.2	0.6	-1.1	0.8	0.1
Q$598	P05555	ITAM_MOUSE	Itgam	Integrin alpha-M	1	10.93	7	1421357	842972	1296915	1231775	98955	21518	90576	73275	15.6	5.7	15.6	13.3	-1.7	0.02	-1.1	0.6	-1.2	0.4	1.5	0.02	1.5	0.02	-1.1	0.6	0.0005
Q$1232	P63168	DYL1_MOUSE	Dynll1	Dynein light chain 1, cytoplasmic	0.9733	24.72	1	1406993	875507	1033730	842398	83260	46237	73458	109734	13.2	11.8	15.9	29.1	-1.6	0.003	-1.4	0.04	-1.7	0.02	1.2	0.3	-1	0.8	-1.2	0.3	0.0006
Q$54	A2AM65	A2AM65_MOUSE	Hp1bp3	Heterochromatin protein 1-binding protein 3 (Fragment)	1	20.55	4	1405998	894054	1631139	1515647	108293	123462	171065	167542	17.2	30.9	23.5	24.7	-1.6	0.07	1.2	0.7	1.1	0.8	1.8	0.05	1.7	0.07	-1.1	0.8	0.01
Q$1525	Q6NZD2	Q6NZD2_MOUSE	Snx1	Sorting nexin 1	1	7.68	3	1403238	654215	1207821	1080027	179755	38368	159427	131772	28.6	13.1	29.5	27.3	-2.1	0.07	-1.2	0.7	-1.3	0.5	1.8	0.1	1.7	0.1	-1.1	0.7	0.01
Q$492	Q61699	HS105_MOUSE	Hsph1	Heat shock protein 105 kDa	1	7.46	5	1400802	971203	1220311	1474698	305640	73782	102701	248879	48.8	17	18.8	37.7	-1.4	0.7	-1.1	0.8	1.1	0.9	1.3	0.4	1.5	0.5	1.2	0.8	0.4
Q$1743	Q91WK5	GCSH_MOUSE	Gcsh	Glycine cleavage system H protein, mitochondrial	0.9317	5.88	1	1399153	882764	1550270	1447920	163003	54706	115011	119530	26.1	13.9	16.6	18.5	-1.6	0.07	1.1	0.9	1	0.9	1.8	0.005	1.6	0.01	-1.1	0.9	0.005
Q$582	F6VBB8	F6VBB8_MOUSE	Gm4978	MCG5732	1	11.61	2	1395161	620034	2471631	1288478	205743	50751	987763	212815	33	18.3	89.4	36.9	-2.3	0.1	1.8	0.7	-1.1	0.7	4	0.4	2.1	0.2	-1.9	0.7	0.1
Q$656	G3UXJ6	G3UXJ6_MOUSE	Syncrip	Heterogeneous nuclear ribonucleoprotein Q	1	20.76	6	1389920	669091	1331380	1128036	75015	56703	181963	166458	12.1	18.9	30.6	33	-2.1	0.0004	-1	0.8	-1.2	0.5	2	0.09	1.7	0.1	-1.2	0.7	0.006
Q$1425	Q60963	PAFA_MOUSE	Pla2g7	Platelet-activating factor acetylhydrolase	0.9989	7.95	2	1386937	1168341	1452558	1430061	104306	65957	128206	158920	16.8	12.6	19.7	24.8	-1.2	0.5	1	1	1	1	1.2	0.4	1.2	0.5	-1	1	0.3
Q$2070	Q9WTX5	SKP1_MOUSE	Skp1	S-phase kinase-associated protein 1	1	28.22	2	1381417	756173	1281017	1271915	74316	45620	73107	126438	12	13.5	12.8	22.2	-1.8	0.0006	-1.1	0.7	-1.1	0.7	1.7	0.001	1.7	0.02	-1	1	0.0004
Q$1222	P63024	VAMP3_MOUSE	Vamp3	Vesicle-associated membrane protein 3	0.9999	38.83	2	1365803	1096051	1351824	1231929	59286	46526	56713	111519	9.7	9.5	9.4	20.2	-1.2	0.04	-1	0.9	-1.1	0.8	1.2	0.04	1.1	0.8	-1.1	0.8	0.06
Q$1950	Q9D892	ITPA_MOUSE	Itpa	Inosine triphosphate pyrophosphatase	0.9998	26.26	2	1363218	785599	1553171	1383377	122518	73804	180568	130657	20.1	21	26	21.1	-1.7	0.02	1.1	0.8	1	0.9	2	0.02	1.8	0.02	-1.1	0.8	0.005
Q$773	O35143	ATIF1_MOUSE	Atpif1	ATPase inhibitor, mitochondrial	1	15.09	3	1362446	700986	1053840	855005	85211	56083	54848	111143	14	17.9	11.6	29.1	-1.9	0.001	-1.3	0.05	-1.6	0.03	1.5	0.01	1.2	0.3	-1.2	0.3	0.0002
Q$1687	Q8K4Z3	NNRE_MOUSE	Apoa1bp	NAD(P)H-hydrate epimerase	0.9375	4.26	1	1359185	731705	1208151	1407708	260031	77244	117627	164401	42.8	23.6	21.8	26.1	-1.9	0.3	-1.1	0.8	1	0.9	1.7	0.05	1.9	0.03	1.2	0.7	0.05
Q$1338	Q9WUR2-2	ECI2_MOUSE	Eci	Isoform 2 of Enoyl-CoA delta isomerase 2, mitochondrial	1	15.08	5	1357996	792734	891218	580555	334843	132388	153518	131843	55.1	37.3	38.5	50.8	-1.7	0.6	-1.5	0.6	-2.3	0.3	1.1	0.6	-1.4	0.6	-1.5	0.6	0.09
Q$738	Q3UW83	Q3UW83_MOUSE	Rps10	40S ribosomal protein S10	1	16.23	2	1355786	2302770	1926374	1442726	303559	805082	231310	365686	50.1	78.2	26.8	56.7	1.7	0.8	1.4	0.7	1.1	0.9	-1.2	0.9	-1.6	0.8	-1.3	0.8	0.5
Q$270	D3Z6N3	D3Z6N3_MOUSE	Mcm7	DNA replication licensing factor MCM7	1	7.46	2	1354960	2482921	1417910	2775794	76016	1647341	143319	1165581	12.5	148.4	22.6	93.9	1.8	1	1	1	2	0.9	-1.8	1	1.1	1	2	0.9	0.7
Q$1416	Q60631-2	GRB2_MOUSE	Grb	Isoform 2 of Growth factor receptor-bound protein 2	0.9997	23.3	2	1353258	610663	1323092	1105979	84838	40030	108386	104358	14	14.7	18.3	21.1	-2.2	0.0003	-1	0.8	-1.2	0.3	2.2	0.001	1.8	0.009	-1.2	0.3	7e-05
Q$1755	Q91ZJ5-2	UGPA_MOUSE	Ugp	Isoform 2 of UTP--glucose-1-phosphate uridylyltransferase	0.9939	7.65	2	1352552	474448	1475507	1002421	285538	37435	342298	150798	47.2	17.6	51.9	33.6	-2.9	0.2	1.1	0.8	-1.3	0.6	3.1	0.2	2.1	0.1	-1.5	0.6	0.04
Q$1347	Q3THS6	METK2_MOUSE	Mat2a	S-adenosylmethionine synthase isoform type-2	1	6.08	2	1351365	1263533	1243178	1136508	59066	85199	99726	36487	9.8	15.1	17.9	7.2	-1.1	0.8	-1.1	0.8	-1.2	0.09	-1	0.9	-1.1	0.7	-1.1	0.8	0.3
Q$144	B7ZC27	B7ZC27_MOUSE	Prpf8	Pre-mRNA-processing-splicing factor 8 (Fragment)	1	5.56	3	1347939	747775	1627564	1156687	149297	36977	362457	134319	24.8	11.1	49.8	26	-1.8	0.08	1.2	0.6	-1.2	0.6	2.2	0.3	1.5	0.2	-1.4	0.6	0.05
Q$1849	Q9CQF3	CPSF5_MOUSE	Nudt21	Cleavage and polyadenylation specificity factor subunit 5	0.9721	3.96	1	1346768	1533393	1771278	1343986	267754	145835	431312	298554	44.5	21.3	54.4	49.7	1.1	1	1.3	1	-1	1	1.2	1	-1.1	1	-1.3	1	0.7
Q$946	P17427	AP2A2_MOUSE	Ap2a2	AP-2 complex subunit alpha-2	1	2.56	2	1346220	993851	1226202	1046915	136324	64346	100293	113044	22.6	14.5	18.3	24.1	-1.4	0.3	-1.1	0.7	-1.3	0.4	1.2	0.4	1.1	0.7	-1.2	0.6	0.1
Q$712	H3BKN2	H3BKN2_MOUSE	Agps	Alkyldihydroxyacetonephosphate synthase, peroxisomal	1	5.11	2	1344860	681986	1718883	1669399	156867	117634	288727	120904	26.1	38.6	37.6	16.2	-2	0.05	1.3	0.5	1.2	0.4	2.5	0.05	2.4	0.002	-1	0.9	0.004
Q$571	F6RSK3	F6RSK3_MOUSE	Gm17430	Protein Gm17430	1	5.1	1	1342537	681925	1234080	1061970	80186	57836	89290	82224	13.4	19	16.2	17.3	-2	0.0009	-1.1	0.4	-1.3	0.1	1.8	0.004	1.6	0.02	-1.2	0.4	0.0001
Q$540	E9Q8S8	E9Q8S8_MOUSE	Hk3	Hexokinase-3	1	5.25	3	1336843	1169087	1370282	1326039	482843	212777	226540	179105	80.8	40.7	37	30.2	-1.1	1	1	1	-1	1	1.2	1	1.1	1	-1	1	1
Q$286	Q64737-2	PUR2_MOUSE	Gar	Isoform Short of Trifunctional purine biosynthetic protein adenosine-3	1	9.01	2	1334255	425495	1048139	822450	81443	131421	248552	186607	13.6	69.1	53	50.7	-3.1	0.002	-1.3	0.5	-1.6	0.2	2.5	0.2	1.9	0.3	-1.3	0.5	0.01
Q$1341	Q3TDQ1	STT3B_MOUSE	Stt3b	Dolichyl-diphosphooligosaccharide--protein glycosyltransferase subunit STT3B	0.9998	3.16	2	1324675	1099768	1350056	1224058	66618	39266	80265	114409	11.2	8	13.3	20.9	-1.2	0.1	1	0.8	-1.1	0.8	1.2	0.1	1.1	0.8	-1.1	0.8	0.2
Q$925	P14685	PSMD3_MOUSE	Psmd3	26S proteasome non-ATPase regulatory subunit 3	1	10.19	4	1322051	1216239	1373896	1372585	85247	62612	75463	62859	14.4	11.5	12.3	10.2	-1.1	0.8	1	1	1	1	1.1	0.5	1.1	0.5	-1	1	0.4
Q$1896	Q9CYN2	SPCS2_MOUSE	Spcs2	Signal peptidase complex subunit 2	0.9996	8.41	1	1321699	815131	1119757	958517	220541	30052	87006	173477	37.3	8.2	17.4	40.5	-1.6	0.4	-1.2	0.8	-1.4	0.7	1.4	0.06	1.2	0.8	-1.2	0.8	0.1
Q$1810	Q99LT0	DPY30_MOUSE	Dpy30	Protein dpy-30 homolog	1	20.2	1	1317980	1467390	1519350	1230330	61069	50332	107390	57155	10.4	7.7	15.8	10.4	1.1	0.3	1.2	0.4	-1.1	0.5	1	0.7	-1.2	0.08	-1.2	0.2	0.04
Q$1602	Q8BXK9	CLIC5_MOUSE	Clic5	Chloride intracellular channel protein 5	1	9.96	2	1315288	1075839	1146291	1118260	34095	70991	43084	36595	5.8	14.8	8.4	7.3	-1.2	0.07	-1.1	0.07	-1.2	0.03	1.1	0.8	1	0.8	-1	0.8	0.02
Q$1632	Q8BU30	SYIC_MOUSE	Iars	Isoleucine--tRNA ligase, cytoplasmic	0.9983	1.82	2	1314077	1261227	2002719	1604757	120571	187211	471307	374125	20.5	33.2	52.6	52.1	-1	0.9	1.5	0.7	1.2	0.9	1.6	0.7	1.3	0.9	-1.2	0.9	0.4
Q$238	D3Z1M3	D3Z1M3_MOUSE	Mlec	Malectin	1	10.96	2	1310431	540989	1266730	1139738	244827	22096	212957	162662	41.8	9.1	37.6	31.9	-2.4	0.1	-1	0.9	-1.1	0.9	2.3	0.1	2.1	0.1	-1.1	0.9	0.03
Q$66	A2ASS6	TITIN_MOUSE	Ttn	Titin	0.9998	0.19	2	1308708	15163135	8992121	7971187	219791	6214093	5638912	5143555	37.6	91.6	140.2	144.3	11.6	0.4	6.9	0.8	6.1	0.8	-1.7	0.8	-1.9	0.8	-1.1	0.9	0.3
Q$1236	P63280	UBC9_MOUSE	Ube2i	SUMO-conjugating enzyme UBC9	1	27.85	2	1305677	495084	1237893	1258568	174478	45913	155620	213966	29.9	20.7	28.1	38	-2.6	0.04	-1.1	1	-1	1	2.5	0.04	2.5	0.08	1	1	0.007
Q$523	E9Q5B5	E9Q5B5_MOUSE	Hk2	Hexokinase-2	1	8.55	6	1305498	1012407	1264913	1193418	43446	30438	70106	75601	7.4	6.7	12.4	14.2	-1.3	0.003	-1	0.8	-1.1	0.6	1.2	0.05	1.2	0.2	-1.1	0.8	0.01
Q$1889	Q9CY58-4	PAIRB_MOUSE	Serbp	Isoform 4 of Plasminogen activator inhibitor 1 RNA-binding protein	1	23.83	4	1305340	550218	1329535	1138597	142213	83261	125474	127163	24.4	33.8	21.1	25	-2.4	0.009	1	0.9	-1.1	0.7	2.4	0.005	2.1	0.02	-1.2	0.7	0.001
Q$2061	Q9R1P3	PSB2_MOUSE	Psmb2	Proteasome subunit beta type-2	0.9986	17.91	2	1302984	811066	1209145	1084856	122603	23998	99416	110930	21	6.6	18.4	22.9	-1.6	0.08	-1.1	0.7	-1.2	0.5	1.5	0.08	1.3	0.2	-1.1	0.7	0.01
Q$753	O08583-2	THOC4_MOUSE	Alyre	Isoform 2 of THO complex subunit 4	1	38.65	3	1302597	976773	1330853	1194367	113317	30491	104586	111822	19.5	7	17.6	20.9	-1.3	0.2	1	0.9	-1.1	0.8	1.4	0.1	1.2	0.4	-1.1	0.8	0.08
Q$1970	Q9DBL1	ACDSB_MOUSE	Acadsb	Short/branched chain specific acyl-CoA dehydrogenase, mitochondrial	1	12.27	3	1293238	1030552	1302417	1228913	60669	23648	86479	75212	10.5	5.1	14.8	13.7	-1.3	0.02	1	0.9	-1.1	0.9	1.3	0.2	1.2	0.2	-1.1	0.9	0.03
Q$779	O35350	CAN1_MOUSE	Capn1	Calpain-1 catalytic subunit	0.9997	1.68	1	1292235	442643	1088388	835740	252682	31293	222710	139807	43.7	15.8	45.8	37.4	-2.9	0.2	-1.2	0.6	-1.5	0.4	2.5	0.2	1.9	0.2	-1.3	0.6	0.03
Q$953	P17809	GTR1_MOUSE	Slc2a1	Solute carrier family 2, facilitated glucose transporter member 1	0.9777	2.03	1	1289677	570944	1136226	963814	86448	15696	173421	123281	15	6.1	34.1	28.6	-2.3	0.006	-1.1	0.7	-1.3	0.2	2	0.1	1.7	0.1	-1.2	0.7	0.003
Q$860	P06797	CATL1_MOUSE	Ctsl	Cathepsin L1	1	14.37	2	1279677	943403	1202946	1099702	103530	49986	83507	128247	18.1	11.8	15.5	26.1	-1.4	0.1	-1.1	0.8	-1.2	0.7	1.3	0.1	1.2	0.7	-1.1	0.8	0.1
Q$79	A2BDX2	A2BDX2_MOUSE	Dpm1	Dolichol-phosphate mannosyltransferase	0.9998	17.31	2	1272914	600063	1075262	961209	48805	51229	76537	95060	8.6	19.1	15.9	22.1	-2.1	7e-05	-1.2	0.1	-1.3	0.06	1.8	0.004	1.6	0.04	-1.1	0.4	4e-05
Q$1787	Q99K85	SERC_MOUSE	Psat1	Phosphoserine aminotransferase	1	12.7	3	1271032	719597	1250340	1006046	155462	80085	177863	158801	27.3	24.9	31.8	35.3	-1.8	0.08	-1	0.9	-1.3	0.6	1.7	0.1	1.4	0.5	-1.2	0.6	0.06
Q$543	Q9JJG0-2	TACC2_MOUSE	Tacc	Isoform 2 of Transforming acidic coiled-coil-containing protein 2	0.9789	10.43	2	1262295	735678	1237262	1186044	75939	88747	152388	112007	13.5	27	27.5	21.1	-1.7	0.01	-1	1	-1.1	0.9	1.7	0.08	1.6	0.07	-1	1	0.01
Q$1121	P53395	ODB2_MOUSE	Dbt	Lipoamide acyltransferase component of branched-chain alpha-keto acid dehydrogenase complex, mitochondrial	0.9849	1.87	1	1261552	1417972	1144367	1105631	92120	143839	71408	106489	16.3	22.7	14	21.5	1.1	0.8	-1.1	0.8	-1.1	0.8	-1.2	0.5	-1.3	0.5	-1	0.8	0.2
Q$679	G3X956	G3X956_MOUSE	Supt16	FACT complex subunit SPT16	0.9999	3.63	3	1254976	1034371	1185395	1037726	53714	45280	46419	72556	9.6	9.8	8.8	15.6	-1.2	0.08	-1.1	0.6	-1.2	0.2	1.1	0.2	1	1	-1.1	0.3	0.03
Q$1452	Q61578	ADRO_MOUSE	Fdxr	NADPH:adrenodoxin oxidoreductase, mitochondrial	0.9001	2.83	1	1253482	493397	826724	975841	164517	122161	145922	207781	29.3	55.4	39.5	47.6	-2.5	0.04	-1.5	0.3	-1.3	0.5	1.7	0.3	2	0.3	1.2	0.6	0.03
Q$515	E9Q3Z4	E9Q3Z4_MOUSE	Hk3	Hexokinase-3	1	3.11	2	1251950	1119454	1287066	1256674	484593	212408	230548	175243	86.6	42.4	40.1	31.2	-1.1	1	1	1	1	1	1.1	1	1.1	1	-1	1	1
Q$2055	Q9R0Q6	ARC1A_MOUSE	Arpc1a	Actin-related protein 2/3 complex subunit 1A	1	3.78	1	1251272	3588690	1221336	2066956	76155	2447482	139898	1191958	13.6	152.5	25.6	128.9	2.9	0.9	-1	0.9	1.7	0.9	-2.9	0.9	-1.7	0.9	1.7	0.9	0.6
Q$1275	P83940	ELOC_MOUSE	Tceb1	Transcription elongation factor B polypeptide 1	1	30.36	2	1247844	1153668	1288939	1205016	112017	37051	64033	104179	20.1	7.2	11.1	19.3	-1.1	0.9	1	1	-1	1	1.1	0.5	1	1	-1.1	0.9	0.7
Q$491	E9Q0K6	E9Q0K6_MOUSE	Samhd1	Deoxynucleoside triphosphate triphosphohydrolase SAMHD1	1	11.21	5	1240155	725663	1346239	1241039	80107	33724	123472	77995	14.4	10.4	20.5	14.1	-1.7	0.002	1.1	0.9	1	1	1.9	0.02	1.7	0.002	-1.1	0.9	0.0004
Q$907	P11679	K2C8_MOUSE	Krt8	Keratin, type II cytoskeletal 8	1	4.29	2	1232633	2795392	1926720	1635275	136739	1049336	433780	265331	24.8	83.9	50.3	36.3	2.3	0.7	1.6	0.7	1.3	0.7	-1.5	0.7	-1.7	0.7	-1.2	0.7	0.3
Q$608	P57776-2	EF1D_MOUSE	Eef1	Isoform 2 of Elongation factor 1-delta	1	26.85	4	1230885	430293	1125033	934633	129604	17838	157320	159390	23.5	9.3	31.3	38.1	-2.9	0.02	-1.1	0.7	-1.3	0.5	2.6	0.05	2.2	0.1	-1.2	0.7	0.002
Q$105	B0R1E3	B0R1E3_MOUSE	Hint1	Histidine triad nucleotide-binding protein 1	1	16.81	1	1227615	524613	1066545	910334	92104	64580	135407	196573	16.8	27.5	28.4	48.3	-2.3	0.001	-1.2	0.6	-1.3	0.5	2	0.03	1.7	0.3	-1.2	0.6	0.01
Q$1879	Q9CWK8	SNX2_MOUSE	Snx2	Sorting nexin-2	0.9564	2.7	1	1224766	364978	881578	730498	269898	14423	190370	142317	49.3	8.8	48.3	43.6	-3.4	0.2	-1.4	0.5	-1.7	0.4	2.4	0.2	2	0.2	-1.2	0.5	0.03
Q$812	O70503	DHB12_MOUSE	Hsd17b12	Estradiol 17-beta-dehydrogenase 12	0.9998	9.29	2	1220481	1055701	1226970	1167945	26837	50100	106012	65752	4.9	10.6	19.3	12.6	-1.2	0.1	1	1	-1	0.9	1.2	0.6	1.1	0.6	-1.1	0.9	0.3
Q$1077	P46656	ADX_MOUSE	Fdx1	Adrenodoxin, mitochondrial	0.9841	4.79	1	1220026	608050	1149414	1101688	117694	37350	143149	136907	21.6	13.7	27.8	27.8	-2	0.03	-1.1	0.9	-1.1	0.9	1.9	0.08	1.8	0.08	-1	0.9	0.007
Q$647	G3UWM1	G3UWM1_MOUSE	Syncrip	Heterogeneous nuclear ribonucleoprotein Q (Fragment)	1	41.84	5	1216026	514651	1139948	975147	81834	57954	179519	154309	15	25.2	35.2	35.4	-2.4	0.0007	-1.1	0.8	-1.2	0.5	2.2	0.05	1.9	0.09	-1.2	0.8	0.006
Q$861	P06800-2	PTPRC_MOUSE	Ptpr	Isoform 2 of Receptor-type tyrosine-protein phosphatase C	1	6.01	5	1213723	763982	984478	713842	431876	209513	316066	92341	79.6	61.3	71.8	28.9	-1.6	0.9	-1.2	0.9	-1.7	0.9	1.3	0.9	-1.1	0.9	-1.4	0.9	0.6
Q$1825	Q99PU7	BAP1_MOUSE	Bap1	Ubiquitin carboxyl-terminal hydrolase BAP1	0.9777	1.24	1	1207077	677217	997701	920033	221174	220424	339950	286943	41	72.8	76.2	69.7	-1.8	0.6	-1.2	1	-1.3	1	1.5	1	1.4	1	-1.1	1	0.6
Q$1876	Q9CW03	SMC3_MOUSE	Smc3	Structural maintenance of chromosomes protein 3	0.9984	2.14	2	1205408	785459	1129178	952811	92734	49609	38578	67083	17.2	14.1	7.6	15.7	-1.5	0.02	-1.1	0.5	-1.3	0.2	1.4	0.004	1.2	0.2	-1.2	0.2	0.001
Q$2084	Q9WVA3	BUB3_MOUSE	Bub3	Mitotic checkpoint protein BUB3	1	12.27	3	1202456	625240	1006046	904258	366218	67360	70889	72248	68.1	24.1	15.8	17.9	-1.9	0.6	-1.2	0.7	-1.3	0.7	1.6	0.03	1.4	0.1	-1.1	0.7	0.2
Q$853	P04919-2	B3AT_MOUSE	Slc4a	Isoform Kidney of Band 3 anion transport protein	1	3.53	3	1196993	857384	1329174	1170564	60670	67688	136071	51509	11.3	17.7	22.9	9.8	-1.4	0.03	1.1	0.7	-1	0.7	1.6	0.06	1.4	0.03	-1.1	0.7	0.009
Q$32	Q9WV02-2	RBMX_MOUSE	Rbm	Isoform 2 of RNA-binding motif protein, X chromosome	1	17.65	4	1184971	524096	1006881	934877	86364	37971	107052	118367	16.3	16.2	23.8	28.3	-2.3	0.0007	-1.2	0.4	-1.3	0.3	1.9	0.01	1.8	0.09	-1.1	0.7	0.001
Q$1665	Q8CIH5	PLCG2_MOUSE	Plcg2	1-phosphatidylinositol 4,5-bisphosphate phosphodiesterase gamma-2	0.9057	1.11	1	1170687	680630	1466883	1387100	79189	124290	287114	232296	15.1	40.8	43.8	37.4	-1.7	0.06	1.3	0.7	1.2	0.7	2.2	0.1	2	0.1	-1.1	0.8	0.05
Q$2091	Q9Z0P5-2	TWF2_MOUSE	Twf	Isoform 2 of Twinfilin-2	0.9986	15.27	3	1160561	984816	1167161	974607	76649	40971	91943	95752	14.8	9.3	17.6	22	-1.2	0.4	1	1	-1.2	0.5	1.2	0.4	-1	1	-1.2	0.5	0.2
Q$37	P26638	SYSC_MOUSE	Sars	Serine--tRNA ligase, cytoplasmic	0.9937	6.45	3	1155543	560341	1133370	1005516	100207	54595	135715	114110	19.4	21.8	26.8	25.4	-2.1	0.005	-1	0.9	-1.1	0.7	2	0.02	1.8	0.03	-1.1	0.7	0.003
Q$145	B7ZCF1	B7ZCF1_MOUSE	Psmc3	26S protease regulatory subunit 6A	1	17.07	5	1154783	676318	1239112	1018621	45741	31733	120939	104538	8.9	10.5	21.8	22.9	-1.7	0.0002	1.1	0.5	-1.1	0.5	1.8	0.04	1.5	0.1	-1.2	0.5	0.001
Q$732	J3QMG3	J3QMG3_MOUSE	Vdac3	Voltage-dependent anion-selective channel protein 3	1	22.18	4	1151176	1027549	1141623	1081322	40108	27816	50852	67624	7.8	6.1	10	14	-1.1	0.2	-1	0.9	-1.1	0.9	1.1	0.4	1.1	0.9	-1.1	0.9	0.3
Q$1561	Q7TMF3	NDUAC_MOUSE	Ndufa12	NADH dehydrogenase [ubiquinone] 1 alpha subcomplex subunit 12	0.9999	20.69	2	1149283	422261	830625	716661	131596	49607	158584	135215	25.6	26.3	42.7	42.2	-2.7	0.005	-1.4	0.3	-1.6	0.2	2	0.2	1.7	0.2	-1.2	0.6	0.007
Q$975	P21995	EMB_MOUSE	Emb	Embigin	1	6.97	2	1149257	1050436	1133584	1030930	79752	45888	68819	83768	15.5	9.8	13.6	18.2	-1.1	0.9	-1	1	-1.1	0.9	1.1	0.9	-1	1	-1.1	0.9	0.6
Q$68	A2ATI6	A2ATI6_MOUSE	Gorasp2	Golgi reassembly stacking protein 2, isoform CRA_c	0.9971	8.26	2	1147301	643224	1207822	1208746	83001	54209	130345	99807	16.2	18.8	24.1	18.5	-1.8	0.006	1.1	1	1.1	1	1.9	0.02	1.9	0.006	1	1	0.002
Q$1586	Q8BFY6	PEF1_MOUSE	Pef1	Peflin	0.9251	4.73	1	1138934	960641	1263227	2221052	140340	270364	170047	782507	27.6	62.9	30.1	78.8	-1.2	0.8	1.1	0.8	2	0.7	1.3	0.8	2.3	0.7	1.8	0.7	0.2
Q$463	E9PWY9	E9PWY9_MOUSE	Farsa	Phenylalanine--tRNA ligase alpha subunit	0.9997	10.65	3	1135196	719470	1206725	1030521	83255	43486	107803	91742	16.4	13.5	20	19.9	-1.6	0.01	1.1	0.7	-1.1	0.7	1.7	0.02	1.4	0.06	-1.2	0.6	0.005
Q$282	D3Z7Q5	D3Z7Q5_MOUSE	Pdcd5	Programmed cell death protein 5	0.9945	6.34	1	1134190	492782	1009120	890450	114188	55328	112554	52291	22.5	25.1	24.9	13.1	-2.3	0.005	-1.1	0.6	-1.3	0.2	2	0.01	1.8	0.005	-1.1	0.6	0.0007
Q$1037	P35174-2	CYT2_MOUSE	Stfa	Isoform 2 of Stefin-2	1	37.86	2	1133240	401989	774839	766627	97608	24660	116045	106304	19.3	13.7	33.5	31	-2.8	0.007	-1.5	0.1	-1.5	0.1	1.9	0.1	1.9	0.1	-1	1	0.0005
Q$1707	Q8R5J9	PRAF3_MOUSE	Arl6ip5	PRA1 family protein 3	1	16.49	2	1130100	708703	917681	807160	84960	58994	39348	58361	16.8	18.6	9.6	16.2	-1.6	0.02	-1.2	0.2	-1.4	0.07	1.3	0.07	1.1	0.3	-1.1	0.3	0.001
Q$1791	Q99KH8	STK24_MOUSE	Stk24	Serine/threonine-protein kinase 24	1	12.53	3	1126596	573085	840762	834516	139044	45923	113329	52688	27.6	17.9	30.1	14.1	-2	0.03	-1.3	0.3	-1.3	0.2	1.5	0.2	1.5	0.03	-1	1	0.009
Q$487	E9Q039	E9Q039_MOUSE	Npepps	Puromycin-sensitive aminopeptidase	1	9.9	4	1122909	725917	992770	843466	82566	108108	104718	56499	16.4	33.3	23.6	15	-1.5	0.1	-1.1	0.6	-1.3	0.1	1.4	0.4	1.2	0.6	-1.2	0.6	0.03
Q$2094	Q9Z127	LAT1_MOUSE	Slc7a5	Large neutral amino acids transporter small subunit 1	1	5.86	2	1122343	523322	1087365	1085732	92076	30747	59899	94913	18.3	13.1	12.3	19.5	-2.1	0.001	-1	1	-1	1	2.1	0.0002	2.1	0.002	-1	1	6e-05
Q$1637	Q8BWY3	ERF1_MOUSE	Etf1	Eukaryotic peptide chain release factor subunit 1	0.981	2.97	1	1119224	931029	1012622	1071135	105951	76117	60077	280134	21.2	18.3	13.3	58.5	-1.2	0.7	-1.1	0.9	-1	1	1.1	0.9	1.2	1	1.1	1	0.8
Q$621	F7CHQ7	F7CHQ7_MOUSE	Nop56	Nucleolar protein 56 (Fragment)	1	26.13	5	1115744	786984	1104518	912328	116256	56501	103973	55501	23.3	16.1	21	13.6	-1.4	0.2	-1	0.9	-1.2	0.5	1.4	0.2	1.2	0.5	-1.2	0.5	0.05
Q$1001	P26954	IL3B2_MOUSE	Csf2rb2	Interleukin-3 receptor class 2 subunit beta	0.9996	1.94	1	1115505	769060	1647625	879749	120193	203216	430745	130973	24.1	59.1	58.5	33.3	-1.5	0.6	1.5	0.6	-1.3	0.6	2.1	0.5	1.1	0.7	-1.9	0.6	0.1
Q$150	E0CXA2	E0CXA2_MOUSE	Cmtm1	MCG21550, isoform CRA_b	0.9785	19.18	2	1109512	30295129	13548034	10379095	190822	16145952	8855094	8822275	38.5	119.2	146.2	190.1	27.3	0.6	12.2	0.7	9.4	0.8	-2.2	0.8	-2.9	0.8	-1.3	0.8	0.3
Q$568	F6RAZ3	F6RAZ3_MOUSE	Acads	Short-chain-specific acyl-CoA dehydrogenase, mitochondrial (Fragment)	1	18.54	4	1109384	666795	1174171	1062924	113842	20370	105228	89931	22.9	6.8	20	18.9	-1.7	0.06	1.1	0.9	-1	0.9	1.8	0.04	1.6	0.05	-1.1	0.8	0.005
Q$1145	Q9JKB1	UCHL3_MOUSE	Uchl3	Ubiquitin carboxyl-terminal hydrolase isozyme L3	1	12.61	2	1106855	432534	967528	779214	77996	43882	97476	102394	15.8	22.7	22.5	29.4	-2.6	0.0004	-1.1	0.4	-1.4	0.1	2.2	0.005	1.8	0.06	-1.2	0.4	0.0002
Q$594	A5JUZ1	A5JUZ1_MOUSE	Ubc	Ubiqutin subunit 1	1	7.14	1	1106248	546639	1004460	889240	80226	78405	98285	93928	16.2	32.1	21.9	23.6	-2	0.006	-1.1	0.7	-1.2	0.3	1.8	0.03	1.6	0.09	-1.1	0.7	0.002
Q$157	D3YTQ9	D3YTQ9_MOUSE	Rps15	40S ribosomal protein S15	1	38.98	2	1095500	1192989	1272358	1376343	49029	91821	83707	111813	10	17.2	14.7	18.2	1.1	0.8	1.2	0.4	1.3	0.3	1.1	0.8	1.2	0.7	1.1	0.8	0.2
Q$1061	P40336-2	VP26A_MOUSE	Vps26	Isoform 2 of Vacuolar protein sorting-associated protein 26A	0.9825	3.62	1	1092935	571936	986125	1240308	85033	36323	142675	492991	17.4	14.2	32.4	88.9	-1.9	0.003	-1.1	0.9	1.1	0.9	1.7	0.2	2.2	0.7	1.3	0.9	0.3
Q$973	P21812	MCPT4_MOUSE	Mcpt4	Mast cell protease 4	1	9.35	2	1091335	834208	1170076	1176966	167312	37970	178568	181860	34.3	10.2	34.1	34.6	-1.3	0.6	1.1	1	1.1	1	1.4	0.6	1.4	0.6	1	1	0.4
Q$1674	Q8K023-2	AKC1H_MOUSE	Akr1c1	Isoform 2 of Aldo-keto reductase family 1 member C18	0.9668	3.7	1	1088030	454717	946100	987925	63008	53109	94374	113902	12.9	26.1	22.3	25.8	-2.4	0.0003	-1.2	0.6	-1.1	0.7	2.1	0.009	2.2	0.01	1	0.8	0.0003
Q$1828	Q9CPP0	NPM3_MOUSE	Npm3	Nucleoplasmin-3	0.9902	12	1	1087955	2413537	1681832	1468432	82575	720527	611466	405938	17	66.8	81.3	61.8	2.2	0.6	1.5	0.9	1.3	0.9	-1.4	0.9	-1.6	0.8	-1.1	0.9	0.4
Q$842	P02463	CO4A1_MOUSE	Col4a1	Collagen alpha-1(IV) chain	0.9569	2.82	1	1087678	631087	1326456	1010953	246612	57862	282735	79540	50.7	20.5	47.7	17.6	-1.7	0.4	1.2	0.8	-1.1	0.8	2.1	0.3	1.6	0.03	-1.3	0.7	0.1
Q$125	B1AWE0	B1AWE0_MOUSE	Clta	Clathrin light chain A	1	12.96	2	1084404	522794	1131002	899389	179948	54429	123444	109744	37.1	23.3	24.4	27.3	-2.1	0.1	1	0.8	-1.2	0.6	2.2	0.01	1.7	0.07	-1.3	0.5	0.01
Q$780	O35405	PLD3_MOUSE	Pld3	Phospholipase D3	0.9988	6.15	2	1076781	558396	855493	925411	79832	45504	82797	125511	16.6	18.2	21.6	30.3	-1.9	0.003	-1.3	0.2	-1.2	0.6	1.5	0.07	1.7	0.1	1.1	0.7	0.006
Q$902	P11276	FINC_MOUSE	Fn1	Fibronectin	0.9798	0.57	1	1074167	525378	1118023	913831	117032	40077	276520	243682	24.4	17.1	55.3	59.6	-2	0.01	1	0.9	-1.2	0.9	2.1	0.4	1.7	0.6	-1.2	0.9	0.2
Q$994	P26043	RADI_MOUSE	Rdx	Radixin	1	2.23	1	1071250	449487	1074634	1055759	178742	40141	143547	225410	37.3	20	29.9	47.7	-2.4	0.1	1	1	-1	1	2.4	0.06	2.3	0.2	-1	1	0.04
Q$999	P26618	PGFRA_MOUSE	Pdgfra	Platelet-derived growth factor receptor alpha	0.9691	0.73	1	1068906	338626	1113503	913325	330652	65671	236766	305879	69.2	43.4	47.5	74.9	-3.2	0.4	1	0.9	-1.2	0.9	3.3	0.2	2.7	0.4	-1.2	0.9	0.2
Q$466	Q05CX5	Q05CX5_MOUSE	Luc7l2	Luc7l2 protein	0.9996	16.81	4	1063736	418043	953680	857444	139060	47916	135246	161041	29.2	25.6	31.7	42	-2.5	0.01	-1.1	0.8	-1.2	0.7	2.3	0.03	2.1	0.2	-1.1	0.8	0.01
Q$1656	Q8CBM2	Q8CBM2_MOUSE	Asph	Aspartyl/asparaginyl beta-hydroxylase	1	10.79	4	1063715	795204	1168152	967341	75086	24126	102763	98715	15.8	6.8	19.7	22.8	-1.3	0.1	1.1	0.7	-1.1	0.7	1.5	0.1	1.2	0.5	-1.2	0.5	0.03
Q$438	E9QJZ1	E9QJZ1_MOUSE	Gm16381	Protein Gm16381	0.9982	12.33	1	1057922	452825	1068798	963368	69441	51342	114201	90306	14.7	25.4	23.9	21	-2.3	0.0007	1	0.9	-1.1	0.8	2.4	0.006	2.1	0.006	-1.1	0.8	0.0002
Q$1715	Q8VDJ3	VIGLN_MOUSE	Hdlbp	Vigilin	0.9988	1.66	1	1057117	327347	856859	728663	35666	36483	149574	106675	7.5	24.9	39	32.7	-3.2	3e-06	-1.2	0.4	-1.5	0.07	2.6	0.07	2.2	0.04	-1.2	0.5	0.0005
Q$1873	Q9CSN1	SNW1_MOUSE	Snw1	SNW domain-containing protein 1	0.9996	4.66	1	1055034	740758	1088239	1038061	71034	36634	153136	90868	15.1	11.1	31.5	19.6	-1.4	0.03	1	1	-1	1	1.5	0.3	1.4	0.08	-1	1	0.08
Q$797	O55022	PGRC1_MOUSE	Pgrmc1	Membrane-associated progesterone receptor component 1	1	28.21	2	1053372	915956	1160349	1119879	33967	73119	48995	20815	7.2	17.9	9.4	4.2	-1.2	0.4	1.1	0.4	1.1	0.4	1.3	0.1	1.2	0.2	-1	0.5	0.01
Q$203	Q9CQI3	GMFB_MOUSE	Gmfb	Glia maturation factor beta	1	25.35	2	1048240	464412	1073448	1011147	67402	39339	116747	127692	14.4	18.9	24.3	28.2	-2.3	0.0004	1	1	-1	1	2.3	0.006	2.2	0.04	-1.1	1	0.0008
Q$1023	P31230	AIMP1_MOUSE	Aimp1	Aminoacyl tRNA synthase complex-interacting multifunctional protein 1	0.9995	9.68	2	1045477	742928	969417	928622	47171	25666	66215	80555	10.1	7.7	15.3	19.4	-1.4	0.003	-1.1	0.6	-1.1	0.6	1.3	0.06	1.2	0.3	-1	0.7	0.01
Q$1168	P61804	DAD1_MOUSE	Dad1	Dolichyl-diphosphooligosaccharide--protein glycosyltransferase subunit DAD1	0.9879	10.62	1	1043918	658482	966893	723967	278814	28667	200087	69562	59.7	9.7	46.3	21.5	-1.6	0.7	-1.1	0.8	-1.4	0.7	1.5	0.7	1.1	0.7	-1.3	0.7	0.4
Q$777	O35290	ECP3_MOUSE	Ear3	Eosinophil cationic-type ribonuclease 3	1	19.23	1	1041515	1043995	1774830	1487025	127947	120126	153852	473278	27.5	25.7	19.4	71.2	1	1	1.7	0.03	1.4	0.9	1.7	0.03	1.4	0.9	-1.2	0.9	0.2
Q$1440	Q61102	ABCB7_MOUSE	Abcb7	ATP-binding cassette sub-family B member 7, mitochondrial	0.9047	1.86	1	1039858	465293	1253939	1114980	135911	87697	91085	156431	29.2	42.1	16.2	31.4	-2.2	0.03	1.2	0.5	1.1	0.7	2.7	0.001	2.4	0.03	-1.1	0.7	0.002
Q$1934	Q9D2V7	CORO7_MOUSE	Coro7	Coronin-7	1	3.58	2	1039639	771629	1008251	847155	61980	22434	84941	73308	13.3	6.5	18.8	19.3	-1.3	0.02	-1	0.8	-1.2	0.3	1.3	0.2	1.1	0.6	-1.2	0.5	0.03
Q$1024	P31310	HXA10_MOUSE	Hoxa10	Homeobox protein Hox-A10	0.9372	8.17	1	1038769	517527	1011713	1024601	197940	81705	229371	226294	42.6	35.3	50.7	49.4	-2	0.2	-1	1	-1	1	2	0.3	2	0.3	1	1	0.2
Q$1933	Q9D2R0	AACS_MOUSE	Aacs	Acetoacetyl-CoA synthetase	0.9991	2.98	2	1037698	936659	1162629	1066012	45320	37524	94883	150932	9.8	9	18.2	31.7	-1.1	0.5	1.1	0.7	1	0.9	1.2	0.3	1.1	0.8	-1.1	0.8	0.4
Q$60	O54879	HMGB3_MOUSE	Hmgb3	High mobility group protein B3	0.9999	16	2	1037364	646918	1281227	1052602	67325	38177	85149	137661	14.5	13.2	14.9	29.2	-1.6	0.005	1.2	0.2	1	0.9	2	0.0008	1.6	0.1	-1.2	0.4	0.001
Q$1084	P47811-3	MK14_MOUSE	Mapk1	Isoform 3 of Mitogen-activated protein kinase 14	0.9994	3.06	1	1036830	449049	1299963	1113083	75129	45775	156581	150591	16.2	22.8	26.9	30.3	-2.3	0.0009	1.3	0.4	1.1	0.7	2.9	0.02	2.5	0.04	-1.2	0.7	0.0006
Q$1766	Q922J9-2	FACR1_MOUSE	Far	Isoform 2 of Fatty acyl-CoA reductase 1	1	24.62	4	1035777	714992	1043579	962060	82069	69224	62640	39472	17.7	21.6	13.4	9.2	-1.4	0.07	1	0.9	-1.1	0.7	1.5	0.05	1.3	0.07	-1.1	0.7	0.008
Q$761	O08915	AIP_MOUSE	Aip	AH receptor-interacting protein	0.927	4.24	1	1034972	858366	1031253	931141	68606	49997	45136	43558	14.8	13	9.8	10.5	-1.2	0.3	-1	1	-1.1	0.6	1.2	0.2	1.1	0.6	-1.1	0.5	0.09
Q$1863	Q9CQX8	RT36_MOUSE	Mrps36	28S ribosomal protein S36, mitochondrial	0.9996	23.53	2	1026142	704451	1063659	1211847	65637	76166	158268	155525	14.3	24.2	33.3	28.7	-1.5	0.07	1	0.8	1.2	0.7	1.5	0.3	1.7	0.09	1.1	0.8	0.06
Q$240	P97496-2	SMRC1_MOUSE	Smarcc	Isoform 2 of SWI/SNF complex subunit SMARCC1	0.9755	1.77	1	1024082	1144028	907102	930666	92235	89498	61328	86602	20.1	17.5	15.1	20.8	1.1	0.8	-1.1	0.8	-1.1	0.8	-1.3	0.3	-1.2	0.5	1	0.8	0.2
Q$589	F6WMD1	F6WMD1_MOUSE	Lrpap1	Alpha-2-macroglobulin receptor-associated protein (Fragment)	1	8.5	1	1017140	2517164	760836	725830	132988	1340559	110553	79467	29.2	119.1	32.5	24.5	2.5	0.7	-1.3	0.6	-1.4	0.5	-3.3	0.7	-3.5	0.7	-1	0.8	0.2
Q$852	P04223-2	HA1K_MOUSE	H2-K	Isoform 2 of H-2 class I histocompatibility antigen, K-K alpha chain	1	11.94	3	1012147	635586	996992	951113	72634	15530	41477	93978	16	5.5	9.3	22.1	-1.6	0.03	-1	0.9	-1.1	0.9	1.6	0.0002	1.5	0.1	-1	0.9	0.002
Q$1336	Q3B7Z2	OSBP1_MOUSE	Osbp	Oxysterol-binding protein 1	0.9708	9.94	2	1011253	836128	1074421	923776	83425	332645	217609	106341	18.4	89	45.3	25.7	-1.2	1	1.1	1	-1.1	1	1.3	1	1.1	1	-1.2	1	0.9
Q$1823	Q99P91	GPNMB_MOUSE	Gpnmb	Transmembrane glycoprotein NMB	0.9999	3.48	2	1008719	2251804	1104728	1057739	72229	1513840	193143	128071	16	150.3	39.1	27.1	2.2	1	1.1	1	1	1	-2	1	-2.1	1	-1	1	0.6
Q$734	P28650-2	PURA1_MOUSE	Adssl	Isoform 2 of Adenylosuccinate synthetase isozyme 1	0.9536	2.92	1	1008200	1249540	1344153	1321113	262876	329176	310062	277544	58.3	58.9	51.6	47	1.2	1	1.3	1	1.3	1	1.1	1	1.1	1	-1	1	0.8
Q$1599	Q8BH78	Q8BH78_MOUSE	Rtn4	Reticulon	1	13.2	2	1005214	409250	907178	749675	146641	30922	115507	117946	32.6	16.9	28.5	35.2	-2.5	0.07	-1.1	0.6	-1.3	0.5	2.2	0.06	1.8	0.2	-1.2	0.6	0.009
Q$1629	Q8BTI8-2	SRRM2_MOUSE	Srrm	Isoform 2 of Serine/arginine repetitive matrix protein 2	1	3.26	6	1004802	807680	948517	908822	104412	46763	59684	56230	23.2	12.9	14.1	13.8	-1.2	0.5	-1.1	0.9	-1.1	0.8	1.2	0.5	1.1	0.6	-1	0.9	0.3
Q$1619	Q8BMD8	SCMC1_MOUSE	Slc25a24	Calcium-binding mitochondrial carrier protein SCaMC-1	0.9901	7.16	2	1000998	418914	950089	968384	133891	14997	170717	129623	29.9	8	40.2	29.9	-2.4	0.07	-1.1	1	-1	1	2.3	0.1	2.3	0.07	1	1	0.01
Q$1396	Q569Z6	TR150_MOUSE	Thrap3	Thyroid hormone receptor-associated protein 3	1	4.73	3	996328	679187	963404	919001	54028	45809	63414	50360	12.1	15.1	14.7	12.3	-1.5	0.01	-1	0.8	-1.1	0.7	1.4	0.03	1.4	0.03	-1	0.8	0.003
Q$1705	Q8R404	QIL1_MOUSE	Qil1	Protein QIL1	0.9999	68.07	3	991104	892165	1092550	1219065	54584	69126	72868	99648	12.3	17.3	14.9	18.3	-1.1	0.6	1.1	0.6	1.2	0.3	1.2	0.3	1.4	0.2	1.1	0.6	0.04
Q$1794	Q99KJ8	DCTN2_MOUSE	Dctn2	Dynactin subunit 2	0.9977	3.98	1	983082	902118	901412	947641	38261	39341	69255	30964	8.7	9.8	17.2	7.3	-1.1	0.7	-1.1	0.9	-1	0.9	-1	1	1.1	0.9	1.1	0.9	0.6
Q$281	D3Z7P4	D3Z7P4_MOUSE	Gls	Glutaminase kidney isoform, mitochondrial	0.9995	6.52	2	981554	1371681	1692566	1319237	90484	405156	407275	232468	20.6	66	53.8	39.4	1.4	0.9	1.7	0.6	1.3	0.7	1.2	0.9	-1	0.9	-1.3	0.9	0.5
Q$1076	P46471	PRS7_MOUSE	Psmc2	26S protease regulatory subunit 7	1	12.93	4	981218	741316	1033281	915822	105761	46108	99684	100436	24.1	13.9	21.6	24.5	-1.3	0.3	1.1	0.9	-1.1	0.9	1.4	0.2	1.2	0.5	-1.1	0.8	0.2
Q$726	Q8VDM4	PSMD2_MOUSE	Psmd2	26S proteasome non-ATPase regulatory subunit 2	1	1.65	2	973551	416204	971934	806594	80089	48960	128168	99647	18.4	26.3	29.5	27.6	-2.3	0.002	-1	1	-1.2	0.5	2.3	0.02	1.9	0.03	-1.2	0.6	0.002
Q$762	Q3TMX0	Q3TMX0_MOUSE	Sdcbp	MCG4375, isoform CRA_b	0.9882	11.07	2	966413	510423	998524	987091	129257	31832	145472	83473	29.9	13.9	32.6	18.9	-1.9	0.1	1	1	1	1	2	0.1	1.9	0.004	-1	1	0.01
Q$1936	Q9D3P8	PLRKT_MOUSE	Plgrkt	Plasminogen receptor (KT)	0.9813	6.8	1	963987	877039	978886	906864	30837	34927	42688	50245	7.2	8.9	9.8	12.4	-1.1	0.5	1	0.9	-1.1	0.8	1.1	0.5	1	0.9	-1.1	0.8	0.3
Q$1147	P59325	IF5_MOUSE	Eif5	Eukaryotic translation initiation factor 5	1	2.1	1	962611	341282	821816	698075	31609	33624	113222	94874	7.3	22	30.8	30.4	-2.8	5e-06	-1.2	0.5	-1.4	0.09	2.4	0.04	2	0.04	-1.2	0.5	0.0002
Q$1605	Q8BHZ0	FA49A_MOUSE	Fam49a	Protein FAM49A	0.9733	4.02	1	962185	353692	823186	616673	78771	47573	137334	69267	18.3	30.1	37.3	25.1	-2.7	0.001	-1.2	0.4	-1.6	0.05	2.3	0.05	1.7	0.05	-1.3	0.4	0.001
Q$1209	P62869	ELOB_MOUSE	Tceb2	Transcription elongation factor B polypeptide 2	0.9581	21.19	1	960662	798994	915547	932907	29124	58121	40427	27446	6.8	16.3	9.9	6.6	-1.2	0.2	-1	0.8	-1	0.8	1.1	0.4	1.2	0.3	1	0.8	0.06
Q$1535	Q6PE01	SNR40_MOUSE	Snrnp40	U5 small nuclear ribonucleoprotein 40 kDa protein	1	8.66	1	955146	866913	969687	813138	31403	29180	50604	68370	7.4	7.5	11.7	18.8	-1.1	0.4	1	0.8	-1.2	0.4	1.1	0.4	-1.1	0.7	-1.2	0.4	0.1
Q$163	D3YU33	D3YU33_MOUSE	Mboat7	Lysophospholipid acyltransferase 7	0.9974	3.49	1	953104	280950	525031	503112	175173	18753	86323	114231	41.1	14.9	36.8	50.8	-3.4	0.1	-1.8	0.2	-1.9	0.2	1.9	0.2	1.8	0.2	-1	0.9	0.006
Q$498	Q9CPV4-2	GLOD4_MOUSE	Glod	Isoform 2 of Glyoxalase domain-containing protein 4	1	16.49	4	951398	661578	1025871	859776	31817	34145	88662	91493	7.5	11.5	19.3	23.8	-1.4	0.002	1.1	0.6	-1.1	0.6	1.6	0.02	1.3	0.3	-1.2	0.5	0.009
Q$16	A2A813	A2A813_MOUSE	Park7	Protein DJ-1	1	17.14	3	950155	372520	912406	805474	140098	15139	139338	146524	33	9.1	34.1	40.7	-2.6	0.08	-1	0.9	-1.2	0.9	2.4	0.08	2.2	0.2	-1.1	0.9	0.02
Q$1366	Q3U962	CO5A2_MOUSE	Col5a2	Collagen alpha-2(V) chain	0.9639	3.94	1	947807	694832	1033558	1010001	163943	151484	195226	309945	38.7	48.7	42.2	68.6	-1.4	0.8	1.1	1	1.1	1	1.5	0.8	1.5	0.9	-1	1	0.7
Q$1234	P63268	ACTH_MOUSE	Actg2	Actin, gamma-enteric smooth muscle	1	7.45	1	946693	390048	966693	915078	64972	46550	171053	117875	15.3	26.7	39.6	28.8	-2.4	0.0007	1	1	-1	1	2.5	0.1	2.3	0.02	-1.1	1	0.005
Q$1277	P84091	AP2M1_MOUSE	Ap2m1	AP-2 complex subunit mu	1	8.51	3	944502	563999	776490	728039	128017	55270	66391	110899	30.3	21.9	19.1	34.1	-1.7	0.1	-1.2	0.6	-1.3	0.6	1.4	0.2	1.3	0.6	-1.1	0.7	0.08
Q$1495	Q63ZW6	Q63ZW6_MOUSE	Col4a5	Col4a5 protein	0.9991	3.31	1	941663	1085544	1026160	1179651	65495	133582	107777	178875	15.6	27.5	23.5	33.9	1.2	0.9	1.1	0.9	1.3	0.8	-1.1	0.9	1.1	0.9	1.1	0.9	0.6
Q$1363	Q3U6K9	Q3U6K9_MOUSE	Psat1	Phosphoserine aminotransferase	0.9999	6.54	2	939474	457272	882101	700837	121364	50511	166326	136976	28.9	24.7	42.2	43.7	-2.1	0.04	-1.1	0.8	-1.3	0.5	1.9	0.3	1.5	0.4	-1.3	0.7	0.06
Q$555	Q8BZ98-2	DYN3_MOUSE	Dnm	Isoform 2 of Dynamin-3	0.9942	0.93	1	934913	348000	864380	805417	137672	26765	104795	56847	32.9	17.2	27.1	15.8	-2.7	0.05	-1.1	0.9	-1.2	0.8	2.5	0.03	2.3	0.0005	-1.1	0.9	0.001
Q$1540	Q6RHW0	K1C9_MOUSE	Krt9	Keratin, type I cytoskeletal 9	0.978	12.38	2	934313	681421	1224174	1129795	79458	12381	99817	134935	19	4.1	18.2	26.7	-1.4	0.1	1.3	0.1	1.2	0.4	1.8	0.03	1.7	0.1	-1.1	0.6	0.004
Q$674	G3UZY2	G3UZY2_MOUSE	Txn2	Thioredoxin (Fragment)	0.9919	30	2	933244	666997	1019000	1007081	63719	19832	25601	27575	15.3	6.6	5.6	6.1	-1.4	0.05	1.1	0.6	1.1	0.6	1.5	3e-05	1.5	4e-05	-1	0.8	2e-05
Q$94	P16546-2	SPTN1_MOUSE	Sptan	Isoform 2 of Spectrin alpha chain, non-erythrocytic 1	1	3.1	4	930612	373092	565580	726582	79299	27542	55925	141003	19.1	16.5	22.1	43.4	-2.5	0.001	-1.6	0.03	-1.3	0.4	1.5	0.06	1.9	0.2	1.3	0.4	0.002
Q$1900	Q9CZD3	SYG_MOUSE	Gars	Glycine--tRNA ligase	1	5.08	2	929112	827938	1020000	1009095	131459	126766	147593	58255	31.6	34.2	32.4	12.9	-1.1	1	1.1	1	1.1	1	1.2	0.9	1.2	0.8	-1	1	0.7
Q$1951	Q9D8C9	Q9D8C9_MOUSE	Pnp2	Purine nucleoside phosphorylase	1	7.21	1	928606	303755	664954	578609	152108	53573	115306	72113	36.6	39.4	38.8	27.9	-3.1	0.03	-1.4	0.4	-1.6	0.2	2.2	0.08	1.9	0.08	-1.1	0.5	0.006
Q$14	A2A7K5	A2A7K5_MOUSE	Mycbp	C-Myc-binding protein	0.9562	13.7	1	923975	221420	774295	614545	58973	15873	39443	54604	14.3	16	11.4	19.9	-4.2	0.0007	-1.2	0.09	-1.5	0.01	3.5	7e-06	2.8	0.005	-1.3	0.09	6e-08
Q$1399	Q5RI75-2	RASEF_MOUSE	Rase	Isoform 2 of Ras and EF-hand domain-containing protein homolog	1	1.98	1	921477	2257000	628634	1848428	134337	1322648	67148	1249953	32.6	131	23.9	151.2	2.4	0.8	-1.5	0.4	2	0.8	-3.6	0.8	-1.2	0.8	2.9	0.8	0.6
Q$1119	P52875	TM165_MOUSE	Tmem165	Transmembrane protein 165	0.9959	13.31	2	920946	797282	880917	885555	64412	13121	103644	62574	15.6	3.7	26.3	15.8	-1.2	0.6	-1	1	-1	1	1.1	0.9	1.1	0.7	1	1	0.6
Q$680	Q9JJW6-2	ALRF2_MOUSE	Alyref	Isoform 2 of Aly/REF export factor 2	1	17.51	2	920440	607768	921706	816290	78685	26061	91501	97784	19.1	9.6	22.2	26.8	-1.5	0.03	1	1	-1.1	0.8	1.5	0.1	1.3	0.3	-1.1	0.8	0.04
Q$716	H3BLF7	H3BLF7_MOUSE	Gnb1	Guanine nucleotide-binding protein G(I)/G(S)/G(T) subunit beta-1 (Fragment)	1	27.78	2	919175	503915	758286	688931	53896	15789	59358	86029	13.1	7	17.5	27.9	-1.8	0.006	-1.2	0.2	-1.3	0.2	1.5	0.05	1.4	0.2	-1.1	0.5	0.001
Q$22	A2ABZ2	A2ABZ2_MOUSE	Pycr1	Pyrroline-5-carboxylate reductase 1, mitochondrial (Fragment)	1	8.82	2	918559	480004	1018756	879422	56344	25082	56408	73894	13.7	11.7	12.4	18.8	-1.9	0.0005	1.1	0.4	-1	0.7	2.1	0.0001	1.8	0.004	-1.2	0.4	2e-05
Q$1395	Q9D358-2	PPAC_MOUSE	Acp	Isoform 2 of Low molecular weight phosphotyrosine protein phosphatase	0.9996	14.56	2	910750	470333	895800	796144	97793	39626	98921	96362	24	18.8	24.7	27.1	-1.9	0.02	-1	0.9	-1.1	0.8	1.9	0.02	1.7	0.06	-1.1	0.8	0.008
Q$1259	P70390-2	SHOX2_MOUSE	Shox	Isoform 2 of Short stature homeobox protein 2	0.9879	12.85	2	910084	662943	1009714	970637	53727	32193	103684	99167	13.2	10.9	23	22.8	-1.4	0.03	1.1	0.8	1.1	0.8	1.5	0.1	1.5	0.09	-1	0.8	0.03
Q$471	E9PYG9	E9PYG9_MOUSE	Samhd1	Deoxynucleoside triphosphate triphosphohydrolase SAMHD1	1	8.59	3	903562	518578	978007	948100	65890	45930	97436	90547	16.3	19.8	22.3	21.4	-1.7	0.008	1.1	0.9	1	0.9	1.9	0.01	1.8	0.01	-1	0.9	0.002
Q$1025	P31324	KAP3_MOUSE	Prkar2b	cAMP-dependent protein kinase type II-beta regulatory subunit	1	4.09	1	901741	823861	904594	833944	33368	40127	54384	41676	8.3	10.9	13.4	11.2	-1.1	0.7	1	1	-1.1	0.7	1.1	0.7	1	1	-1.1	0.7	0.4
Q$1483	Q62376	RU17_MOUSE	Snrnp70	U1 small nuclear ribonucleoprotein 70 kDa	0.9999	5.8	2	900277	449632	901081	786902	71736	39652	79270	87912	17.8	19.7	19.7	25	-2	0.003	1	1	-1.1	0.7	2	0.005	1.8	0.03	-1.1	0.7	0.001
Q$599	Q921T2-2	TOIP1_MOUSE	Tor1aip	Isoform 2 of Torsin-1A-interacting protein 1	0.9997	10.42	4	896427	450816	859207	705296	28230	43778	86157	50794	7	21.7	22.4	16.1	-2	0.0002	-1	0.7	-1.3	0.03	1.9	0.01	1.6	0.02	-1.2	0.3	0.0002
Q$90	D3Z5M2	D3Z5M2_MOUSE	Gm10110	Protein Gm10110	1	9.11	6	894424	796830	836925	840606	44091	68139	64298	98270	11	19.1	17.2	26.1	-1.1	0.8	-1.1	1	-1.1	1	1.1	1	1.1	1	1	1	0.8
Q$13	Q80UG5-2	SEPT9_MOUSE	Sept	Isoform 2 of Septin-9	1	17.66	6	894208	478493	905394	805145	58713	66378	75271	98142	14.7	31	18.6	27.3	-1.9	0.009	1	0.9	-1.1	0.8	1.9	0.01	1.7	0.1	-1.1	0.8	0.003
Q$1684	Q8K3J1	NDUS8_MOUSE	Ndufs8	NADH dehydrogenase [ubiquinone] iron-sulfur protein 8, mitochondrial	0.9998	15.09	2	891203	7645764	1037131	4809229	89287	5274990	56843	4001074	22.4	154.3	12.3	186	8.6	0.8	1.2	0.7	5.4	0.8	-7.4	0.8	-1.6	0.8	4.6	0.8	0.4
Q$1434	Q61035	SYHC_MOUSE	Hars	Histidine--tRNA ligase, cytoplasmic	1	5.89	2	889383	827762	1055795	852529	77374	284739	120304	82089	19.5	76.9	25.5	21.5	-1.1	1	1.2	0.8	-1	1	1.3	0.9	1	1	-1.2	0.7	0.8
Q$1296	P97452	BOP1_MOUSE	Bop1	Ribosome biogenesis protein BOP1	0.9076	3.55	1	887846	960551	890968	803681	191311	336719	89838	75106	48.2	78.4	22.5	20.9	1.1	1	1	1	-1.1	1	-1.1	1	-1.2	1	-1.1	1	1
Q$1473	Q62087	PON3_MOUSE	Pon3	Serum paraoxonase/lactonase 3	0.9704	4.52	1	887814	766815	855291	845017	21833	15276	36990	45178	5.5	4.5	9.7	12	-1.2	0.01	-1	0.8	-1.1	0.8	1.1	0.3	1.1	0.5	-1	0.9	0.09
Q$539	Q8VH51-2	RBM39_MOUSE	Rbm3	Isoform 2 of RNA-binding protein 39	1	10.69	4	879582	353891	736788	651520	58183	27489	65820	64714	14.8	17.4	20	22.2	-2.5	0.0002	-1.2	0.3	-1.4	0.09	2.1	0.003	1.8	0.01	-1.1	0.4	5e-05
Q$4	A2A4X6	A2A4X6_MOUSE	Gm12355	MCG21910	1	12.88	2	879129	871625	847453	734713	22157	43484	45916	36181	5.6	11.2	12.1	11	-1	0.9	-1	0.9	-1.2	0.05	-1	0.9	-1.2	0.2	-1.2	0.3	0.06
Q$1880	Q9CWW6	PIN4_MOUSE	Pin4	Peptidyl-prolyl cis-trans isomerase NIMA-interacting 4	0.9968	22.9	1	878829	595823	1055871	726480	102225	61364	175961	45560	26	23	37.3	14	-1.5	0.2	1.2	0.4	-1.2	0.4	1.8	0.2	1.2	0.4	-1.5	0.4	0.05
Q$1606	Q8BIG7	CMTD1_MOUSE	Comtd1	Catechol O-methyltransferase domain-containing protein 1	1	20.61	4	875802	519710	905009	856975	42306	25900	66877	75446	10.8	11.1	16.5	19.7	-1.7	0.0006	1	1	-1	1	1.7	0.003	1.6	0.01	-1.1	1	0.0005
Q$1626	Q8BRF7-2	SCFD1_MOUSE	Scfd	Isoform 2 of Sec1 family domain-containing protein 1	0.9966	11.54	2	874896	371726	783696	750874	51147	43743	70227	103483	13.1	26.3	20	30.8	-2.4	0.0004	-1.1	0.7	-1.2	0.7	2.1	0.005	2	0.04	-1	0.8	0.0007
Q$565	F6QJN8	F6QJN8_MOUSE	Capzb	F-actin-capping protein subunit beta (Fragment)	1	40.91	2	874341	495632	856080	751692	72065	35925	83084	101963	18.4	16.2	21.7	30.3	-1.8	0.009	-1	0.9	-1.2	0.7	1.7	0.02	1.5	0.2	-1.1	0.7	0.01
Q$618	F7BX42	F7BX42_MOUSE	Nptxr	Neuronal pentraxin receptor	0.9143	12.17	1	872854	1597870	1397020	1548055	116489	95758	64789	124080	29.8	13.4	10.4	17.9	1.8	0.008	1.6	0.02	1.8	0.02	-1.1	0.3	-1	0.8	1.1	0.5	0.0005
Q$432	E0CXA8	E0CXA8_MOUSE	Manf	Arginine-rich, mutated in early stage tumors, isoform CRA_c	1	35.04	5	870374	331528	775577	679317	32394	47739	93849	108769	8.3	32.2	27.1	35.8	-2.6	8e-05	-1.1	0.6	-1.3	0.4	2.3	0.01	2	0.07	-1.1	0.6	0.0009
Q$976	Q544X6	Q544X6_MOUSE	Fech	Ferrochelatase	1	12.32	3	867706	609776	1133119	942411	49379	5966	44376	69384	12.7	2.2	8.8	16.5	-1.4	0.02	1.3	0.02	1.1	0.4	1.9	0.002	1.5	0.03	-1.2	0.1	1e-05
Q$216	D3YZJ1	D3YZJ1_MOUSE	Sqstm1	Sequestosome-1	1	12.3	3	866456	810088	906344	864125	93886	106726	125858	150127	24.2	29.5	31.1	38.8	-1.1	1	1	1	-1	1	1.1	1	1.1	1	-1	1	1
Q$266	D3Z629	D3Z629_MOUSE	Rpl9	60S ribosomal protein L9	1	39.76	5	863622	585858	857243	824952	66974	26879	85452	128975	17.3	10.3	22.3	35	-1.5	0.03	-1	1	-1	1	1.5	0.1	1.4	0.4	-1	1	0.1
Q$15	A2A7S7	A2A7S7_MOUSE	Yars	Tyrosine--tRNA ligase, cytoplasmic	0.9993	10.28	3	863426	659801	862146	795149	65137	26858	59747	62504	16.9	9.1	15.5	17.6	-1.3	0.1	-1	1	-1.1	0.8	1.3	0.09	1.2	0.3	-1.1	0.8	0.06
Q$824	O88668	CREG1_MOUSE	Creg1	Protein CREG1	1	13.18	2	860671	791342	802415	686500	53252	82127	35434	48530	13.8	23.2	9.9	15.8	-1.1	0.8	-1.1	0.8	-1.3	0.2	1	0.9	-1.2	0.8	-1.2	0.4	0.2
Q$1329	Q07563	COHA1_MOUSE	Col17a1	Collagen alpha-1(XVII) chain	0.975	2.11	1	860486	708476	926199	703129	50195	70149	137404	75146	13	22.1	33.2	23.9	-1.2	0.5	1.1	0.9	-1.2	0.5	1.3	0.6	-1	1	-1.3	0.6	0.2
Q$1821	Q99P72-3	RTN4_MOUSE	Rtn	Isoform 2 of Reticulon-4	1	1.53	1	859656	261744	740562	588058	144357	23186	120919	109463	37.5	19.8	36.5	41.6	-3.3	0.08	-1.2	0.6	-1.5	0.4	2.8	0.08	2.2	0.1	-1.3	0.6	0.008
Q$473	E9PYI8	E9PYI8_MOUSE	Usp14	Ubiquitin carboxyl-terminal hydrolase	1	11.57	3	859205	788203	900899	906788	53021	46396	63867	45930	13.8	13.2	15.9	11.3	-1.1	0.8	1	0.9	1.1	0.9	1.1	0.7	1.2	0.5	1	0.9	0.4
Q$873	P08207	S10AA_MOUSE	S100a10	Protein S100-A10	1	31.96	3	857980	583741	896157	822074	65433	36446	88300	77619	17.1	14	22	21.1	-1.5	0.04	1	0.9	-1	0.9	1.5	0.06	1.4	0.09	-1.1	0.9	0.02
Q$83	A2BH40-3	ARI1A_MOUSE	Arid1	Isoform 3 of AT-rich interactive domain-containing protein 1A	1	1.45	1	855773	198706	729533	696735	123368	15271	117547	101119	32.2	17.2	36	32.5	-4.3	0.03	-1.2	0.7	-1.2	0.7	3.7	0.04	3.5	0.04	-1	0.8	0.001
Q$895	P10711	TCEA1_MOUSE	Tcea1	Transcription elongation factor A protein 1	0.9955	3.32	1	855714	698001	874724	547870	277417	219650	265178	98006	72.5	70.4	67.8	40	-1.2	1	1	1	-1.6	0.9	1.3	1	-1.3	1	-1.6	0.9	0.7
Q$134	Q63886	UD11_MOUSE	Ugt1a1	UDP-glucuronosyltransferase 1-1	1	9.35	3	852339	663434	1042222	945481	76610	34669	74728	120255	20.1	11.7	16	28.4	-1.3	0.2	1.2	0.3	1.1	0.8	1.6	0.01	1.4	0.3	-1.1	0.8	0.03
Q$1419	Q60737	CSK21_MOUSE	Csnk2a1	Casein kinase II subunit alpha	0.9982	9.46	2	850615	536045	733901	815855	70046	13618	87380	84275	18.4	5.7	26.6	23.1	-1.6	0.06	-1.2	0.7	-1	0.8	1.4	0.3	1.5	0.1	1.1	0.8	0.03
Q$1493	Q63836	SBP2_MOUSE	Selenbp2	Selenium-binding protein 2	1	6.36	2	848471	750849	849543	729815	30830	26140	69406	46723	8.1	7.8	18.3	14.3	-1.1	0.2	1	1	-1.2	0.3	1.1	0.6	-1	0.9	-1.2	0.6	0.2
Q$64	A2ARI0	A2ARI0_MOUSE	Tmx4	Thioredoxin-related transmembrane protein 4	0.9864	7.1	1	847250	305170	588042	718872	67154	16465	74387	70867	17.7	12.1	28.3	22	-2.8	0.005	-1.4	0.09	-1.2	0.4	1.9	0.07	2.4	0.02	1.2	0.4	0.0001
Q$279	D3Z7E5	D3Z7E5_MOUSE	Gsk3a	Glycogen synthase kinase-3 alpha	0.9116	15.43	1	844498	4350305	1801818	1848405	103580	1625876	813829	603871	27.4	83.6	101	73.1	5.2	0.5	2.1	0.6	2.2	0.6	-2.4	0.6	-2.4	0.6	1	1	0.1
Q$1717	Q8VDL4-3	ADPGK_MOUSE	Adpg	Isoform 3 of ADP-dependent glucokinase	1	15.56	4	840784	463915	795036	662463	74420	33154	50794	24833	19.8	16	14.3	8.4	-1.8	0.007	-1.1	0.6	-1.3	0.1	1.7	0.004	1.4	0.007	-1.2	0.1	0.0003
Q$2065	Q9WTL7	LYPA2_MOUSE	Lypla2	Acyl-protein thioesterase 2	0.9973	7.79	1	840686	678286	764900	663052	100648	107281	52444	60411	26.8	35.4	15.3	20.4	-1.2	0.8	-1.1	0.9	-1.3	0.7	1.1	0.9	-1	0.9	-1.2	0.7	0.4
Q$1712	Q8VC49	IF27B_MOUSE	Ifi27l2b	Interferon alpha-inducible protein 27-like protein 2B	0.9234	19.79	1	839939	761059	993704	901359	159829	109405	117401	82887	42.5	32.1	26.4	20.6	-1.1	0.9	1.2	0.9	1.1	0.9	1.3	0.7	1.2	0.9	-1.1	0.9	0.6
Q$1694	Q8R016	BLMH_MOUSE	Blmh	Bleomycin hydrolase	0.9991	4.4	1	832235	671143	740950	863350	117979	78230	101166	113931	31.7	26.1	30.5	29.5	-1.2	0.8	-1.1	0.9	1	0.9	1.1	0.9	1.3	0.7	1.2	0.9	0.6
Q$558	Q922K7	NOP2_MOUSE	Nop2	Putative ribosomal RNA methyltransferase NOP2	0.9982	1.13	1	830010	296828	621900	592195	163864	14168	88438	103806	44.1	10.7	31.8	39.2	-2.8	0.1	-1.3	0.6	-1.4	0.6	2.1	0.1	2	0.2	-1.1	0.8	0.02
Q$713	H3BKP1	H3BKP1_MOUSE	Hmox1	Heme oxygenase 1 (Fragment)	1	15.82	2	828359	452933	836375	814356	67415	47012	83237	68236	18.2	23.2	22.3	18.7	-1.8	0.01	1	1	-1	1	1.8	0.02	1.8	0.01	-1	1	0.002
Q$40	A2AG41	A2AG41_MOUSE	Stoml2	Stomatin-like protein 2, mitochondrial (Fragment)	1	25.82	4	825892	466242	875959	1202411	157971	16902	117117	355098	42.8	8.1	29.9	66	-1.8	0.4	1.1	0.8	1.5	0.7	1.9	0.1	2.6	0.4	1.4	0.7	0.1
Q$1157	P61021	RAB5B_MOUSE	Rab5b	Ras-related protein Rab-5B	1	6.51	1	825414	443266	976341	782567	140643	55027	177537	94034	38.1	27.8	40.7	26.9	-1.9	0.2	1.2	0.8	-1.1	0.8	2.2	0.2	1.8	0.08	-1.2	0.7	0.05
Q$1128	P54728	RD23B_MOUSE	Rad23b	UV excision repair protein RAD23 homolog B	0.9867	4.57	1	814036	295324	889906	643939	161697	36021	92348	133955	44.4	27.3	23.2	46.5	-2.8	0.1	1.1	0.7	-1.3	0.7	3	0.002	2.2	0.2	-1.4	0.4	0.01
Q$1000	P26883	FKB1A_MOUSE	Fkbp1a	Peptidyl-prolyl cis-trans isomerase FKBP1A	1	43.52	3	809830	621795	858885	765354	25183	55749	68772	34101	7	20	17.9	10	-1.3	0.09	1.1	0.6	-1.1	0.6	1.4	0.1	1.2	0.2	-1.1	0.6	0.02
Q$2007	Q9ESY9	GILT_MOUSE	Ifi30	Gamma-interferon-inducible lysosomal thiol reductase	0.9749	5.24	1	804332	718546	859091	759365	69186	55158	56893	88070	19.2	17.2	14.8	25.9	-1.1	0.9	1.1	0.9	-1.1	0.9	1.2	0.5	1.1	0.9	-1.1	0.9	0.5
Q$201	P12970	RL7A_MOUSE	Rpl7a	60S ribosomal protein L7a protein	1	17.29	4	803624	297042	912127	754168	67700	11804	81923	115900	18.8	8.9	20.1	34.4	-2.7	0.009	1.1	0.7	-1.1	0.7	3.1	0.009	2.5	0.06	-1.2	0.7	0.0002
Q$1944	Q9D6U8	F162A_MOUSE	Fam162a	Protein FAM162A	0.9774	12.9	1	802342	551301	777354	700961	80796	58161	82815	78094	22.5	23.6	23.8	24.9	-1.5	0.2	-1	0.8	-1.1	0.8	1.4	0.3	1.3	0.5	-1.1	0.8	0.1
Q$1977	Q9DC70	NDUS7_MOUSE	Ndufs7	NADH dehydrogenase [ubiquinone] iron-sulfur protein 7, mitochondrial	1	6.25	1	793146	553469	709335	712497	44493	52457	51460	56936	12.5	21.2	16.2	17.9	-1.4	0.05	-1.1	0.6	-1.1	0.6	1.3	0.3	1.3	0.3	1	1	0.03
Q$189	D3YX27	D3YX27_MOUSE	Htra2	Serine protease HTRA2, mitochondrial	0.9989	10.33	2	781463	400846	832091	667480	58383	68320	55973	128341	16.7	38.1	15	43	-1.9	0.01	1.1	0.7	-1.2	0.7	2.1	0.007	1.7	0.4	-1.2	0.6	0.01
Q$749	O70378	EMC8_MOUSE	Emc8	ER membrane protein complex subunit 8	1	12.56	2	778867	525469	756717	756611	92902	45848	119187	90609	26.7	19.5	35.2	26.8	-1.5	0.2	-1	1	-1	1	1.4	0.4	1.4	0.2	-1	1	0.2
Q$1284	P97315	CSRP1_MOUSE	Csrp1	Cysteine and glycine-rich protein 1	0.9766	7.77	1	775762	960740	1099173	931598	25385	56028	90527	50490	7.3	13	18.4	12.1	1.2	0.1	1.4	0.1	1.2	0.1	1.1	0.4	-1	0.7	-1.2	0.4	0.01
Q$167	D3Z5F7	D3Z5F7_MOUSE	Gm20521	Protein Gm20521	0.9995	8.41	1	766874	585422	515227	541062	114801	121454	109923	55218	33.5	46.4	47.7	22.8	-1.3	0.8	-1.5	0.6	-1.4	0.5	-1.1	1	-1.1	1	1.1	1	0.3
Q$1631	Q8BU14	SEC62_MOUSE	Sec62	Translocation protein SEC62	0.9929	5.28	2	766850	292233	596056	604591	97735	24611	70265	100924	28.5	18.8	26.4	37.3	-2.6	0.03	-1.3	0.5	-1.3	0.5	2	0.02	2.1	0.1	1	0.9	0.005
Q$2033	Q9QUR6	PPCE_MOUSE	Prep	Prolyl endopeptidase	0.9641	2.39	1	766726	661872	738909	705780	37798	43821	70514	75872	11	14.8	21.3	24	-1.2	0.5	-1	0.9	-1.1	0.9	1.1	0.9	1.1	0.9	-1	0.9	0.6
Q$564	F6Q609	F6Q609_MOUSE	Cct3	T-complex protein 1 subunit gamma (Fragment)	1	3.26	1	766018	398168	814948	692758	77340	42990	65961	110128	22.6	24.1	18.1	35.5	-1.9	0.02	1.1	0.8	-1.1	0.8	2	0.004	1.7	0.1	-1.2	0.7	0.007
Q$1997	Q9ERD7	TBB3_MOUSE	Tubb3	Tubulin beta-3 chain	1	3.78	1	764240	393530	824710	750176	150546	35887	138852	122795	44	20.4	37.6	36.6	-1.9	0.2	1.1	1	-1	1	2.1	0.2	1.9	0.2	-1.1	1	0.09
Q$127	B1AXH1	NHSL2_MOUSE	Nhsl2	NHS-like protein 2	0.9008	4.57	1	759700	242341	851711	673560	64471	10172	117815	107431	19	9.4	30.9	35.7	-3.1	0.007	1.1	0.8	-1.1	0.8	3.5	0.03	2.8	0.06	-1.3	0.7	0.0007
Q$162	D3YU17	D3YU17_MOUSE	Ncln	Nicalin	0.9862	3.74	1	758865	310917	806261	745560	53263	47641	99266	65826	15.7	34.3	27.5	19.7	-2.4	0.001	1.1	0.9	-1	0.9	2.6	0.008	2.4	0.003	-1.1	0.9	0.0004
Q$1088	P47968	RPIA_MOUSE	Rpia	Ribose-5-phosphate isomerase	0.9657	4.29	1	758078	634539	692278	688035	46628	23032	73992	80176	13.8	8.1	23.9	26.1	-1.2	0.2	-1.1	1	-1.1	1	1.1	1	1.1	1	-1	1	0.6
Q$1320	Q04692	SMRCD_MOUSE	Smarcad1	SWI/SNF-related matrix-associated actin-dependent regulator of chromatin subfamily A containing DEAD/H box 1	0.9503	2.64	1	756168	579748	821325	605817	61142	48782	50246	56540	18.1	18.8	13.7	20.9	-1.3	0.2	1.1	0.7	-1.2	0.3	1.4	0.05	1	0.7	-1.4	0.1	0.02
Q$1527	Q6P3Z8	Q6P3Z8_MOUSE	Kat2a	Histone acetyltransferase KAT2A	0.9941	7.72	2	753755	736255	820025	1039977	63068	65366	102557	107964	18.7	19.9	28	23.2	-1	0.9	1.1	0.9	1.4	0.2	1.1	0.9	1.4	0.2	1.3	0.5	0.09
Q$1451	Q61462-2	CY24A_MOUSE	Cyb	Isoform 2 of Cytochrome b-245 light chain	0.9937	17.07	1	749461	368575	691672	665381	65526	62482	138312	115458	19.6	37.9	44.7	38.8	-2	0.02	-1.1	0.9	-1.1	0.9	1.9	0.2	1.8	0.2	-1	0.9	0.07
Q$1271	P81117	NUCB2_MOUSE	Nucb2	Nucleobindin-2	0.9987	7.62	2	749070	382959	803581	773607	89746	23820	98885	59746	26.8	13.9	27.5	17.3	-2	0.06	1.1	1	1	1	2.1	0.06	2	0.002	-1	1	0.003
Q$158	D3YTS1	D3YTS1_MOUSE	Sec11a	Sec11-like 1 (S. cerevisiae), isoform CRA_d	0.9904	8.5	2	748929	510815	494865	410695	126038	258140	39723	74220	37.6	113	17.9	40.4	-1.5	0.8	-1.5	0.5	-1.8	0.3	-1	1	-1.2	0.9	-1.2	0.8	0.4
Q$1882	Q9CX34	SUGT1_MOUSE	Sugt1	Suppressor of G2 allele of SKP1 homolog	0.9999	6.85	2	748585	320262	679985	572886	58004	15566	88844	82357	17.3	10.9	29.2	32.1	-2.3	0.007	-1.1	0.6	-1.3	0.3	2.1	0.07	1.8	0.1	-1.2	0.6	0.002
Q$729	Q99M28-2	RNPS1_MOUSE	Rnps	Isoform 2 of RNA-binding protein with serine-rich domain 1	1	14.89	2	747312	497310	763145	690921	61822	35438	93538	46589	18.5	15.9	27.4	15.1	-1.5	0.05	1	0.9	-1.1	0.9	1.5	0.1	1.4	0.05	-1.1	0.9	0.03
Q$692	G5E883	G5E883_MOUSE	Snrpa1	Small nuclear ribonucleoprotein polypeptide A', isoform CRA_a	1	36.36	3	736732	595002	740137	674276	63658	9275	56604	38635	19.3	3.5	17.1	12.8	-1.2	0.4	1	1	-1.1	0.7	1.2	0.3	1.1	0.4	-1.1	0.7	0.1
Q$44	P25085-2	IL1RA_MOUSE	Il1r	Isoform 2 of Interleukin-1 receptor antagonist protein	1	50.94	4	735911	572281	695854	641966	41391	26613	53410	44804	12.6	10.4	17.2	15.6	-1.3	0.06	-1.1	0.7	-1.1	0.5	1.2	0.3	1.1	0.5	-1.1	0.7	0.08
Q$1013	P29351-3	PTN6_MOUSE	Ptpn	Isoform 3 of Tyrosine-protein phosphatase non-receptor type 6	1	8.63	4	729392	534680	841208	748065	53141	22813	52434	76567	16.3	9.5	13.9	22.9	-1.4	0.05	1.2	0.4	1	0.8	1.6	0.004	1.4	0.2	-1.1	0.6	0.008
Q$186	Q921Z5-2	TFIP8_MOUSE	Tnfaip	Isoform 2 of Tumor necrosis factor alpha-induced protein 8	0.9367	14.71	1	726400	487320	807077	789893	128224	50568	53072	76311	39.5	23.2	14.7	21.6	-1.5	0.4	1.1	0.9	1.1	0.9	1.7	0.01	1.6	0.05	-1	0.9	0.05
Q$148	B7ZD61	B7ZD61_MOUSE	Rbm39	RNA-binding protein 39 (Fragment)	1	14.29	3	726139	228199	601214	524844	52387	29180	66624	60002	16.1	28.6	24.8	25.6	-3.2	0.0002	-1.2	0.3	-1.4	0.1	2.6	0.004	2.3	0.009	-1.1	0.4	6e-05
Q$754	O08686	BARX2_MOUSE	Barx2	Homeobox protein BarH-like 2	0.9864	19.79	1	722721	1003099	1075301	1317296	45938	185603	93709	155683	14.2	41.4	19.5	26.4	1.4	0.6	1.5	0.06	1.8	0.08	1.1	0.7	1.3	0.6	1.2	0.6	0.04
Q$1040	P35279-2	RAB6A_MOUSE	Rab6	Isoform 2 of Ras-related protein Rab-6A	1	10.58	2	718381	349034	663021	626147	42680	36234	88142	80127	13.3	23.2	29.7	28.6	-2.1	0.001	-1.1	0.8	-1.1	0.7	1.9	0.05	1.8	0.05	-1.1	0.8	0.005
Q$472	Q91V12-2	BACH_MOUSE	Acot	Isoform A of Cytosolic acyl coenzyme A thioester hydrolase	0.9999	6.8	2	713645	264987	531555	464793	60179	23784	48410	56010	18.9	20.1	20.4	26.9	-2.7	0.0007	-1.3	0.09	-1.5	0.05	2	0.006	1.8	0.04	-1.1	0.4	9e-05
Q$654	Q8BHD7-2	PTBP3_MOUSE	Ptbp	Isoform 2 of Polypyrimidine tract-binding protein 3	1	14.04	3	707771	270992	655778	523555	50874	21207	105509	99892	16.1	17.5	36	42.7	-2.6	0.0003	-1.1	0.7	-1.4	0.4	2.4	0.1	1.9	0.2	-1.3	0.6	0.005
Q$1539	Q6PZE0	MUC19_MOUSE	Muc19	Mucin-19	0.9655	0.81	1	707388	1387515	1194803	1037680	83443	319672	302257	324877	26.4	51.5	56.6	70	2	0.5	1.7	0.6	1.5	0.8	-1.2	0.9	-1.3	0.8	-1.2	0.9	0.4
Q$683	G3X9U9	G3X9U9_MOUSE	Fis1	Fission 1 (Mitochondrial outer membrane) homolog (Yeast), isoform CRA_c	1	15.86	2	706878	812152	681728	792684	39262	52644	24769	27160	12.4	14.5	8.1	7.7	1.1	0.4	-1	0.8	1.1	0.4	-1.2	0.2	-1	0.8	1.2	0.1	0.07
Q$1498	Q64261	CDK6_MOUSE	Cdk6	Cyclin-dependent kinase 6	0.9993	4.6	1	705440	409293	571373	636147	55529	34681	42562	100637	17.6	18.9	16.7	35.4	-1.7	0.01	-1.2	0.3	-1.1	0.8	1.4	0.09	1.6	0.2	1.1	0.8	0.03
Q$561	Q05920	PYC_MOUSE	Pc	Pyruvate carboxylase, mitochondrial	0.9994	2.97	2	705005	285801	594659	579575	107672	21944	89321	65207	34.2	17.2	33.6	25.2	-2.5	0.08	-1.2	0.7	-1.2	0.7	2.1	0.09	2	0.02	-1	0.9	0.01
Q$482	P97822-2	AN32E_MOUSE	Anp32	Isoform 2 of Acidic leucine-rich nuclear phosphoprotein 32 family member E	1	17.74	3	701082	440656	655624	618444	59997	35359	50481	68924	19.1	17.9	17.2	24.9	-1.6	0.03	-1.1	0.8	-1.1	0.8	1.5	0.04	1.4	0.2	-1.1	0.8	0.02
Q$764	O09005	DEGS1_MOUSE	Degs1	Sphingolipid delta(4)-desaturase DES1	0.9835	4.95	1	698123	658931	740542	700266	70345	28784	35622	62934	22.5	9.8	10.8	20.1	-1.1	1	1.1	1	1	1	1.1	0.5	1.1	1	-1.1	1	0.8
Q$531	E9Q6U4	E9Q6U4_MOUSE	Pfdn4	Protein Pfdn4	0.9002	11.54	1	697400	564125	720740	500339	27010	58796	46742	37988	8.7	23.3	14.5	17	-1.2	0.3	1	0.7	-1.4	0.02	1.3	0.3	-1.1	0.6	-1.4	0.03	0.007
Q$1102	P49962	SRP09_MOUSE	Srp9	Signal recognition particle 9 kDa protein	0.9555	12.79	1	691681	477604	747292	711695	84567	22662	135661	106534	27.3	10.6	40.6	33.5	-1.4	0.3	1.1	1	1	1	1.6	0.4	1.5	0.4	-1.1	1	0.2
Q$228	D3Z0M9	D3Z0M9_MOUSE	Ddx23	MCG18410, isoform CRA_a	0.9116	1.47	1	688404	627304	713083	698695	51863	37033	48822	68833	16.8	13.2	15.3	22	-1.1	0.9	1	1	1	1	1.1	0.7	1.1	0.9	-1	1	0.7
Q$1371	Q3UEB3-2	PUF60_MOUSE	Puf6	Isoform 2 of Poly(U)-binding-splicing factor PUF60	0.9996	9.32	3	688257	485456	654716	593488	75696	20302	72811	44845	24.6	9.4	24.9	16.9	-1.4	0.3	-1.1	0.8	-1.2	0.7	1.3	0.3	1.2	0.3	-1.1	0.7	0.1
Q$1865	Q9CR51	VATG1_MOUSE	Atp6v1g1	V-type proton ATPase subunit G 1	1	27.97	3	687688	474742	683152	626720	45850	16957	50421	66241	14.9	8	16.5	23.6	-1.4	0.01	-1	0.9	-1.1	0.9	1.4	0.02	1.3	0.3	-1.1	0.9	0.02
Q$1344	Q9R0U0-2	SRS10_MOUSE	Srsf1	Isoform 2 of Serine/arginine-rich splicing factor 10	1	10.34	2	682246	370435	586809	501789	94626	75074	101466	102416	31	45.3	38.7	45.6	-1.8	0.2	-1.2	0.8	-1.4	0.7	1.6	0.5	1.4	0.7	-1.2	0.8	0.2
Q$657	Q9D7G0	PRPS1_MOUSE	Prps1	Ribose-phosphate pyrophosphokinase 1	1	22.01	4	679660	444933	717460	584000	98492	27545	53085	48051	32.4	13.8	16.5	18.4	-1.5	0.3	1.1	0.7	-1.2	0.6	1.6	0.01	1.3	0.2	-1.2	0.3	0.03
Q$237	D3Z1M1	D3Z1M1_MOUSE	Gnb2	Guanine nucleotide-binding protein G(I)/G(S)/G(T) subunit beta-2 (Fragment)	1	9.69	2	677211	277966	523238	459651	47978	11382	55626	73077	15.8	9.2	23.8	35.5	-2.4	0.005	-1.3	0.2	-1.5	0.1	1.9	0.05	1.7	0.2	-1.1	0.5	0.0006
Q$1555	Q78IK2	USMG5_MOUSE	Usmg5	Up-regulated during skeletal muscle growth protein 5	0.9995	25.86	1	676920	529473	680075	637869	101840	28303	56717	32342	33.6	12	18.6	11.3	-1.3	0.6	1	1	-1.1	0.9	1.3	0.2	1.2	0.2	-1.1	0.9	0.3
Q$452	E9PV38	E9PV38_MOUSE	Ces2g	Protein Ces2g	0.9946	5.36	2	672979	474271	868477	695667	47767	17165	52321	119077	15.9	8.1	13.5	38.3	-1.4	0.02	1.3	0.1	1	0.9	1.8	0.0006	1.5	0.4	-1.2	0.4	0.01
Q$61	A2APD7	A2APD7_MOUSE	Nop56	Nucleolar protein 56 (Fragment)	1	8.78	2	672897	425780	601771	469224	131393	74936	74970	42862	43.7	39.4	27.9	20.4	-1.6	0.6	-1.1	0.9	-1.4	0.6	1.4	0.6	1.1	0.9	-1.3	0.6	0.2
Q$1194	P62715	PP2AB_MOUSE	Ppp2cb	Serine/threonine-protein phosphatase 2A catalytic subunit beta isoform	1	8.41	2	667559	527363	777089	693300	42555	35487	91684	41958	14.3	15	26.4	13.5	-1.3	0.2	1.2	0.7	1	0.7	1.5	0.2	1.3	0.1	-1.1	0.7	0.05
Q$625	F8WH69	F8WH69_MOUSE	Ncf1	Neutrophil cytosol factor 1	0.9995	7.18	2	667258	400023	612619	601492	78328	18041	83359	77677	26.2	10.1	30.4	28.9	-1.7	0.1	-1.1	0.9	-1.1	0.9	1.5	0.3	1.5	0.3	-1	0.9	0.07
Q$245	D3Z2N9	D3Z2N9_MOUSE	Sap18	Histone deacetylase complex subunit SAP18	0.9997	24.42	2	664242	481896	751101	635632	25715	34629	71553	43939	8.7	16.1	21.3	15.5	-1.4	0.02	1.1	0.5	-1	0.6	1.6	0.05	1.3	0.1	-1.2	0.5	0.008
Q$964	P19973-2	LSP1_MOUSE	Lsp	Isoform 2 of Lymphocyte-specific protein 1	1	21.65	4	663190	466161	624718	585057	41710	25804	33823	45749	14.1	12.4	12.1	17.5	-1.4	0.02	-1.1	0.7	-1.1	0.6	1.3	0.03	1.3	0.2	-1.1	0.7	0.01
Q$477	E9PYT3	E9PYT3_MOUSE	Atl3	Atlastin-3	1	15.49	4	660813	551938	715826	784807	51921	34675	54560	92771	17.6	14	17	26.4	-1.2	0.4	1.1	0.7	1.2	0.6	1.3	0.2	1.4	0.2	1.1	0.7	0.1
Q$1640	Q8BYQ0	Q8BYQ0_MOUSE	Nceh1	Arylacetamide deacetylase-like 1, isoform CRA_c	0.9986	7.04	1	659267	243585	744390	592828	91439	27603	122711	106157	31	25.3	36.9	40	-2.7	0.05	1.1	0.8	-1.1	0.8	3.1	0.07	2.4	0.1	-1.3	0.8	0.009
Q$1027	P31938	MP2K1_MOUSE	Map2k1	Dual specificity mitogen-activated protein kinase kinase 1	0.9976	3.05	1	658515	302290	500540	471534	140169	103269	141053	102812	47.6	76.4	63	48.8	-2.2	0.4	-1.3	0.8	-1.4	0.8	1.7	0.8	1.6	0.8	-1.1	0.9	0.3
Q$1827	Q9CPN9	Q9CPN9_MOUSE	2210010C04Rik	Protein 2210010C04Rik	0.921	9.31	1	657873	1724206	1473991	1071721	50452	579293	492234	436778	17.1	75.1	74.7	91.1	2.6	0.6	2.2	0.6	1.6	0.9	-1.2	0.9	-1.6	0.9	-1.4	0.9	0.4
Q$1342	Q3TE40	Q3TE40_MOUSE	Rpa2	DNA-directed RNA polymerase I subunit RPA2	0.9998	12.96	2	654952	366719	667499	643790	104307	107895	97867	83247	35.6	65.8	32.8	28.9	-1.8	0.4	1	1	-1	1	1.8	0.4	1.8	0.4	-1	1	0.1
Q$461	E9PWM7	E9PWM7_MOUSE	Gnb2	Guanine nucleotide-binding protein G(I)/G(S)/G(T) subunit beta-2	1	49.58	6	646925	432577	634527	583391	57569	52045	45522	39724	19.9	26.9	16	15.2	-1.5	0.1	-1	0.9	-1.1	0.8	1.5	0.1	1.3	0.2	-1.1	0.8	0.03
Q$1049	P35821	PTN1_MOUSE	Ptpn1	Tyrosine-protein phosphatase non-receptor type 1	0.9977	4.4	1	646119	223019	597322	626606	34410	28685	124998	159990	11.9	28.8	46.8	57.1	-2.9	8e-05	-1.1	1	-1	1	2.7	0.2	2.8	0.2	1	1	0.03
Q$439	E0CY42	E0CY42_MOUSE	Clic6	Chloride intracellular channel protein 6 (Fragment)	1	8	1	645450	773063	585213	611823	52256	64997	49419	32462	18.1	18.8	18.9	11.9	1.2	0.5	-1.1	0.8	-1.1	0.8	-1.3	0.3	-1.3	0.3	1	0.8	0.08
Q$521	E9Q514	E9Q514_MOUSE	Ndrg1	Protein NDRG1 (Fragment)	1	39.01	2	645397	1703164	777308	917864	80560	592441	194105	278562	27.9	77.8	55.8	67.9	2.6	0.6	1.2	0.8	1.4	0.8	-2.2	0.6	-1.9	0.7	1.2	0.8	0.2
Q$113	B1ART1	B1ART1_MOUSE	Vps13d	Protein Vps13d	0.9205	0.67	1	641228	378621	599971	515753	53493	19098	45488	25220	18.7	11.3	17	10.9	-1.7	0.01	-1.1	0.6	-1.2	0.2	1.6	0.01	1.4	0.01	-1.2	0.3	0.001
Q$1774	Q923L7	Q923L7_MOUSE	Ear6	Ear6 protein	1	20.65	2	640576	519832	555693	601680	32966	35749	90280	47245	11.5	15.4	36.3	17.6	-1.2	0.2	-1.2	0.9	-1.1	0.9	1.1	0.9	1.2	0.7	1.1	0.9	0.5
Q$1729	Q8WTY4	CPIN1_MOUSE	Ciapin1	Anamorsin	0.9999	13.92	2	635662	251048	609500	562026	99656	21821	50096	86430	35.1	19.4	18.4	34.4	-2.5	0.08	-1	0.9	-1.1	0.9	2.4	0.001	2.2	0.08	-1.1	0.9	0.005
Q$2063	Q9R1T2-2	SAE1_MOUSE	Sae	Isoform 2 of SUMO-activating enzyme subunit 1	0.9993	10.06	2	632666	401411	676676	596868	30973	35028	94395	88368	10.9	19.5	31.2	33.1	-1.6	0.007	1.1	0.9	-1.1	0.9	1.7	0.1	1.5	0.3	-1.1	0.9	0.06
Q$1348	Q8BFY9-2	TNPO1_MOUSE	Tnpo	Isoform 2 of Transportin-1	1	4.16	2	631138	454711	619955	571051	89790	34559	51825	98653	31.8	17	18.7	38.6	-1.4	0.4	-1	1	-1.1	1	1.4	0.2	1.3	0.8	-1.1	1	0.3
Q$448	E9PUV4	E9PUV4_MOUSE	Skp1a	S-phase kinase-associated protein 1 (Fragment)	1	30.21	1	628707	225988	617067	590733	17601	5001	85668	84604	6.3	4.9	31	32	-2.8	4e-05	-1	1	-1.1	1	2.7	0.05	2.6	0.05	-1	1	0.0006
Q$1479	Q62261-2	SPTB2_MOUSE	Sptbn	Isoform 2 of Spectrin beta chain, non-erythrocytic 1	1	1.35	2	627424	519291	823412	604478	40712	27356	78008	62774	14.5	11.8	21.2	23.2	-1.2	0.3	1.3	0.3	-1	0.8	1.6	0.04	1.2	0.4	-1.4	0.3	0.01
Q$1700	Q8R2P8	Q8R2P8_MOUSE	Kars	Lysine--tRNA ligase	1	4.01	2	627418	427200	691147	691786	55679	29320	85372	190508	19.8	15.3	27.6	61.6	-1.5	0.08	1.1	0.9	1.1	0.9	1.6	0.09	1.6	0.7	1	1	0.3
Q$538	E9Q855	E9Q855_MOUSE	Scamp3	Secretory carrier-associated membrane protein 3	0.9773	11.43	2	626741	521147	661146	546057	18001	19763	36448	26172	6.4	8.5	12.3	10.7	-1.2	0.03	1.1	0.7	-1.1	0.1	1.3	0.05	1	0.7	-1.2	0.1	0.005
Q$1132	P55258	RAB8A_MOUSE	Rab8a	Ras-related protein Rab-8A	1	6.76	1	626406	287718	454868	627107	103625	51186	66482	103180	37	39.8	32.7	36.8	-2.2	0.1	-1.4	0.5	1	1	1.6	0.3	2.2	0.1	1.4	0.5	0.03
Q$1079	P46978	STT3A_MOUSE	Stt3a	Dolichyl-diphosphooligosaccharide--protein glycosyltransferase subunit STT3A	0.9997	3.69	2	625174	338151	694317	645510	28749	22780	75011	87112	10.3	15.1	24.2	30.2	-1.8	0.0003	1.1	0.8	1	0.9	2.1	0.03	1.9	0.09	-1.1	0.9	0.003
Q$443	E0CZ09	E0CZ09_MOUSE	Gsx2	GS homeobox 2	0.965	35.07	1	623239	279284	794500	645632	82888	45691	127980	76594	29.7	36.6	36	26.5	-2.2	0.03	1.3	0.6	1	0.8	2.8	0.03	2.3	0.02	-1.2	0.6	0.006
Q$1589	Q8BG07-2	PLD4_MOUSE	Pld	Isoform 2 of Phospholipase D4	0.9996	9.7	3	618164	479934	682214	687330	38574	39523	43042	66383	14	18.4	14.1	21.6	-1.3	0.1	1.1	0.7	1.1	0.7	1.4	0.05	1.4	0.1	1	1	0.03
Q$166	D3YUA3	D3YUA3_MOUSE	Pfkp	6-phosphofructokinase type C (Fragment)	1	32.93	2	618073	220134	688174	683039	115652	22541	111784	120629	41.8	22.9	36.3	39.5	-2.8	0.1	1.1	1	1.1	1	3.1	0.07	3.1	0.08	-1	1	0.01
Q$2048	Q9QZI9	SERC3_MOUSE	Serinc3	Serine incorporator 3	0.9161	2.75	1	605244	642991	721515	659578	46975	34343	84480	69743	17.4	11.9	26.2	23.6	1.1	1	1.2	0.8	1.1	1	1.1	0.9	1	1	-1.1	1	0.6
Q$1421	Q60857	SC6A4_MOUSE	Slc6a4	Sodium-dependent serotonin transporter	0.9842	2.54	1	592506	542122	640229	611448	52629	19357	74386	31237	19.9	8	26	11.4	-1.1	0.9	1.1	0.9	1	0.9	1.2	0.8	1.1	0.5	-1	0.9	0.6
Q$673	P60605	UB2G2_MOUSE	Ube2g2	Ubiquitin-conjugating enzyme E2 G2	0.9562	13.33	1	589939	447416	599135	503457	57552	46038	61478	65507	21.8	23	22.9	29.1	-1.3	0.4	1	0.9	-1.2	0.8	1.3	0.4	1.1	0.8	-1.2	0.8	0.2
Q$1838	Q9CQ01	RNT2_MOUSE	Rnaset2	Ribonuclease T2	0.9369	6.18	1	589702	95651	258211	223687	265086	10315	31696	55768	100.5	24.1	27.4	55.7	-6.2	0.4	-2.3	0.6	-2.6	0.6	2.7	0.007	2.3	0.4	-1.2	0.6	0.1
Q$1913	Q9D0R8	LSM12_MOUSE	Lsm12	Protein LSM12 homolog	0.997	6.67	1	583611	358345	481356	565818	65344	57377	76502	46648	25	35.8	35.5	18.4	-1.6	0.2	-1.2	0.7	-1	0.8	1.3	0.7	1.6	0.1	1.2	0.7	0.08
Q$284	D3Z7U0	D3Z7U0_MOUSE	Anxa11	Annexin	1	6.26	2	583462	398484	638598	590062	55347	42460	47454	58584	21.2	23.8	16.6	22.2	-1.5	0.1	1.1	0.9	1	0.9	1.6	0.03	1.5	0.1	-1.1	0.9	0.02
Q$226	D3Z0K1	D3Z0K1_MOUSE	Ndufv1	NADH dehydrogenase [ubiquinone] flavoprotein 1, mitochondrial (Fragment)	0.9999	35.62	3	583346	409436	521747	674513	50401	35234	160103	175486	19.3	19.2	68.6	58.2	-1.4	0.1	-1.1	1	1.2	1	1.3	1	1.6	0.7	1.3	1	0.5
Q$1531	Q6P5F9	XPO1_MOUSE	Xpo1	Exportin-1	0.9995	3.17	2	581382	424973	555241	504920	18610	6015	51699	44564	7.2	3.2	20.8	19.7	-1.4	0.0003	-1	0.7	-1.2	0.5	1.3	0.3	1.2	0.5	-1.1	0.7	0.03
Q$569	Q9JIX8-4	ACINU_MOUSE	Acin	Isoform 4 of Apoptotic chromatin condensation inducer in the nucleus	0.9903	2.47	2	580037	260246	533626	475470	46393	31014	89417	67058	17.9	26.6	37.5	31.5	-2.2	0.003	-1.1	0.9	-1.2	0.6	2.1	0.09	1.8	0.09	-1.1	0.9	0.01
Q$535	E9Q7G4	E9Q7G4_MOUSE	Bahcc1	BAH and coiled-coil domain-containing protein 1	0.9729	1.25	2	579434	262055	537189	446169	62990	59407	66403	65717	24.3	50.7	27.6	32.9	-2.2	0.04	-1.1	0.7	-1.3	0.5	2	0.07	1.7	0.3	-1.2	0.6	0.01
Q$195	D3Z568	D3Z568_MOUSE	Ndufb5	NADH dehydrogenase (Ubiquinone) 1 beta subcomplex, 5, isoform CRA_e	0.9943	12.61	2	578580	415156	589761	571912	39771	17176	41887	83413	15.4	9.3	15.9	32.6	-1.4	0.03	1	1	-1	1	1.4	0.03	1.4	0.4	-1	1	0.09
Q$566	F6QYF8	F6QYF8_MOUSE	Npepps	Puromycin-sensitive aminopeptidase (Fragment)	1	4.68	2	578539	272197	468168	436790	49918	19749	45969	52322	19.3	16.2	22	26.8	-2.1	0.003	-1.2	0.3	-1.3	0.2	1.7	0.02	1.6	0.07	-1.1	0.7	0.001
Q$86	A2CER2	A2CER2_MOUSE	Rcc1	Regulator of chromosome condensation (Fragment)	1	25	1	576420	311295	670170	572930	30722	29663	47885	56830	11.9	21.3	16	22.2	-1.9	0.001	1.2	0.4	-1	1	2.2	0.001	1.8	0.01	-1.2	0.4	0.0001
Q$1841	Q9CQ40	RM49_MOUSE	Mrpl49	39S ribosomal protein L49, mitochondrial	0.9504	8.43	1	575434	453008	607405	563472	67074	28756	54566	49613	26.1	14.2	20.1	19.7	-1.3	0.4	1.1	0.9	-1	0.9	1.3	0.2	1.2	0.4	-1.1	0.9	0.2
Q$1744	Q91WS0	CISD1_MOUSE	Cisd1	CDGSH iron-sulfur domain-containing protein 1	0.9889	12.04	1	574756	591654	729228	950228	73494	138655	132009	238485	28.6	52.4	40.5	56.1	1	0.9	1.3	0.8	1.7	0.7	1.2	0.8	1.6	0.7	1.3	0.8	0.3
Q$2015	Q9JIG8	PRAF2_MOUSE	Praf2	PRA1 family protein 2	0.978	6.18	1	573240	615819	621712	610204	49426	53506	71516	83411	19.3	19.4	25.7	30.6	1.1	1	1.1	1	1.1	1	1	1	-1	1	-1	1	1
Q$1335	Q2TPA8	HSDL2_MOUSE	Hsdl2	Hydroxysteroid dehydrogenase-like protein 2	0.9874	2.24	1	572145	205754	517367	375031	76563	36169	99805	52192	29.9	39.3	43.1	31.1	-2.8	0.02	-1.1	0.7	-1.5	0.2	2.5	0.09	1.8	0.1	-1.4	0.4	0.009
Q$7	A2A591	KRA31_MOUSE	Krtap3-1	Keratin-associated protein 3-1	0.9998	17.35	2	570545	673760	523558	762984	120308	376463	67248	312939	47.2	124.9	28.7	91.7	1.2	1	-1.1	1	1.3	1	-1.3	1	1.1	1	1.5	1	0.9
Q$72	Q3TUJ9	Q3TUJ9_MOUSE	Tpd52l2	Tumor protein D52-like 2, isoform CRA_a	0.9582	16.13	1	566512	392247	554802	649313	42016	42374	62334	108538	16.6	24.2	25.1	37.4	-1.4	0.1	-1	0.9	1.1	0.9	1.4	0.3	1.7	0.3	1.2	0.9	0.1
Q$161	D3YU09	D3YU09_MOUSE	Gda	Guanine deaminase	1	11.58	2	565875	240550	579158	485476	38364	33493	42763	74730	15.2	31.1	16.5	34.4	-2.4	0.001	1	0.8	-1.2	0.7	2.4	0.001	2	0.07	-1.2	0.7	0.0006
Q$1716	Q8VDL4-2	ADPGK_MOUSE	Adpg	Isoform 2 of ADP-dependent glucokinase	1	18.24	2	564631	229498	450998	369986	81371	21940	49838	25712	32.2	21.4	24.7	15.5	-2.5	0.05	-1.3	0.3	-1.5	0.2	2	0.02	1.6	0.02	-1.2	0.3	0.002
Q$1009	P28474	ADHX_MOUSE	Adh5	Alcohol dehydrogenase class-3	0.9048	7.49	1	560481	257161	514421	510728	12473	12536	74376	52981	5	10.9	32.3	23.2	-2.2	8e-07	-1.1	0.8	-1.1	0.8	2	0.1	2	0.04	-1	1	0.001
Q$1497	Q99JA5	Q99JA5_MOUSE	Ly6e	Ly6e protein	0.9518	10.29	1	556735	461950	487538	474506	60902	15567	52046	41626	24.5	7.5	23.9	19.6	-1.2	0.7	-1.1	0.9	-1.2	0.8	1.1	1	1	1	-1	1	0.5
Q$1805	Q99LB6-2	MAT2B_MOUSE	Mat2	Isoform 2 of Methionine adenosyltransferase 2 subunit beta	0.9983	11.46	2	551971	463173	617787	509586	36869	19601	31645	39809	14.9	9.5	11.5	17.5	-1.2	0.3	1.1	0.5	-1.1	0.5	1.3	0.02	1.1	0.5	-1.2	0.3	0.03
Q$115	B1AT92	B1AT92_MOUSE	Grb2	Growth factor receptor-bound protein 2	0.9965	8.37	1	549002	359144	645400	451670	59779	35405	106650	84297	24.3	22	37	41.7	-1.5	0.1	1.2	0.7	-1.2	0.7	1.8	0.2	1.3	0.7	-1.4	0.6	0.09
Q$1748	Q91YH5-2	ATLA3_MOUSE	Atl	Isoform 2 of Atlastin-3	1	16.71	3	548305	427897	573944	655398	56679	30945	50148	97453	23.1	16.2	19.5	33.2	-1.3	0.3	1	0.7	1.2	0.7	1.3	0.2	1.5	0.3	1.1	0.7	0.1
Q$1578	Q80Y14	GLRX5_MOUSE	Glrx5	Glutaredoxin-related protein 5, mitochondrial	1	20.39	2	544914	1041077	751167	740160	7443	374217	201105	173093	3.1	80.4	59.9	52.3	1.9	0.8	1.4	0.9	1.4	0.9	-1.4	0.9	-1.4	0.9	-1	1	0.5
Q$1765	Q922H2	PDK3_MOUSE	Pdk3	[Pyruvate dehydrogenase (acetyl-transferring)] kinase isozyme 3, mitochondrial	0.9999	3.13	2	541551	247550	506743	394110	63412	23734	19868	12734	26.2	21.4	8.8	7.2	-2.2	0.007	-1.1	0.6	-1.4	0.2	2	0.0002	1.6	0.003	-1.3	0.006	0.0001
Q$533	Q60715-2	P4HA1_MOUSE	P4ha	Isoform 2 of Prolyl 4-hydroxylase subunit alpha-1	1	7.12	3	539698	271146	411405	382502	71746	11841	52804	47416	29.7	9.8	28.7	27.7	-2	0.1	-1.3	0.3	-1.4	0.3	1.5	0.2	1.4	0.3	-1.1	0.7	0.02
Q$30	A2AFF6	A2AFF6_MOUSE	Stag2	Cohesin subunit SA-2	0.9253	1.66	1	538967	409079	622371	421247	57159	31056	42074	16598	23.7	17	15.1	8.8	-1.3	0.3	1.2	0.5	-1.3	0.3	1.5	0.02	1	0.7	-1.5	0.01	0.004
Q$658	P01901	HA1B_MOUSE	H2-K1	H-2 class I histocompatibility antigen, K-B alpha chain	1	3.52	1	538810	269853	529762	516874	48273	20567	45803	51910	20	17	19.3	22.5	-2	0.005	-1	1	-1	1	2	0.005	1.9	0.009	-1	1	0.001
Q$1706	Q8R502	LRC8C_MOUSE	Lrrc8c	Leucine-rich repeat-containing protein 8C	0.9628	1.74	1	536960	299029	453456	405389	123511	43561	91724	103612	51.4	32.6	45.2	57.2	-1.8	0.5	-1.2	0.8	-1.3	0.8	1.5	0.6	1.4	0.8	-1.1	0.8	0.4
Q$1298	P97742	CPT1A_MOUSE	Cpt1a	Carnitine O-palmitoyltransferase 1, liver isoform	0.9615	3.62	1	536473	439460	469918	555218	44202	47704	27309	83762	18.4	24.3	13	33.7	-1.2	0.7	-1.1	0.7	1	0.8	1.1	0.8	1.3	0.7	1.2	0.7	0.4
Q$467	E9PXX7	E9PXX7_MOUSE	Txndc5	Thioredoxin domain-containing protein 5	0.9998	12.79	3	535651	456614	640047	565865	51107	20159	32011	80050	21.3	9.9	11.2	31.6	-1.2	0.6	1.2	0.5	1.1	0.8	1.4	0.008	1.2	0.6	-1.1	0.7	0.1
Q$218	D3YZT0	D3YZT0_MOUSE	Rpl9	60S ribosomal protein L9 (Fragment)	1	41.25	3	532077	359828	526315	469116	35761	22082	37366	56738	15	13.7	15.9	27	-1.5	0.02	-1	0.9	-1.1	0.8	1.5	0.02	1.3	0.4	-1.1	0.8	0.03
Q$1590	Q8BG32	PSD11_MOUSE	Psmd11	26S proteasome non-ATPase regulatory subunit 11	1	11.85	4	528240	396034	587470	454465	40628	20177	42103	52163	17.2	11.4	16	25.7	-1.3	0.09	1.1	0.7	-1.2	0.7	1.5	0.02	1.1	0.7	-1.3	0.3	0.02
Q$288	D6RDC7	D6RDC7_MOUSE	Wdr61	WD repeat-containing protein 61	0.956	8.21	1	524685	454913	528173	499545	15166	11343	53955	26734	6.5	5.6	22.8	12	-1.2	0.04	1	1	-1.1	0.8	1.2	0.7	1.1	0.6	-1.1	0.9	0.4
Q$628	Q569Z5-2	DDX46_MOUSE	Ddx4	Isoform 2 of Probable ATP-dependent RNA helicase DDX46	0.9995	2.14	2	522378	183327	652265	473027	32127	17636	82628	100456	13.8	21.5	28.3	47.5	-2.8	9e-05	1.2	0.5	-1.1	0.7	3.6	0.02	2.6	0.2	-1.4	0.5	0.001
Q$768	O09131	GSTO1_MOUSE	Gsto1	Glutathione S-transferase omega-1	1	4.17	1	522169	502292	617843	514961	36115	44085	18499	57553	15.5	19.6	6.7	25	-1	1	1.2	0.2	-1	1	1.2	0.2	1	1	-1.2	0.5	0.2
Q$1657	Q8CCK0	H2AW_MOUSE	H2afy2	Core histone macro-H2A.2	1	6.99	2	521384	455044	686779	509988	49862	43538	85251	53161	21.4	21.4	27.8	23.3	-1.1	0.7	1.3	0.5	-1	0.9	1.5	0.2	1.1	0.7	-1.3	0.5	0.08
Q$1832	Q9CPS5	Q9CPS5_MOUSE	Psmd8	26S proteasome non-ATPase regulatory subunit 8	0.9999	15.92	2	521099	339949	680275	474917	46338	20388	70844	60473	19.9	13.4	23.3	28.5	-1.5	0.04	1.3	0.2	-1.1	0.6	2	0.04	1.4	0.2	-1.4	0.2	0.003
Q$1484	Q62418-2	DBNL_MOUSE	Dbn	Isoform 2 of Drebrin-like protein	1	9.24	2	519387	266663	501001	450630	50331	32630	67314	52626	21.7	27.4	30	26.1	-1.9	0.02	-1	0.8	-1.2	0.8	1.9	0.07	1.7	0.07	-1.1	0.8	0.01
Q$1693	Q8R010	AIMP2_MOUSE	Aimp2	Aminoacyl tRNA synthase complex-interacting multifunctional protein 2	0.9998	12.81	2	512449	457202	497474	542937	44263	16539	29789	72010	19.3	8.1	13.4	29.7	-1.1	0.9	-1	0.9	1.1	0.9	1.1	0.9	1.2	0.9	1.1	0.9	0.6
Q$283	Q3TBD2-2	HMHA1_MOUSE	Hmha	Isoform 2 of Minor histocompatibility protein HA-1	0.9158	0.8	1	510343	181563	400687	322313	65768	25740	66922	73959	28.8	31.7	37.3	51.3	-2.8	0.01	-1.3	0.5	-1.6	0.3	2.2	0.08	1.8	0.3	-1.2	0.5	0.01
Q$545	Q61768	KINH_MOUSE	Kif5b	Kinesin-1 heavy chain	0.9498	1.25	1	508496	194425	446728	353800	18237	27447	46107	19016	8	31.6	23.1	12	-2.6	7e-05	-1.1	0.2	-1.4	0.002	2.3	0.006	1.8	0.006	-1.3	0.2	9e-06
Q$181	D3YVY3	D3YVY3_MOUSE	Idh1	Isocitrate dehydrogenase [NADP] cytoplasmic (Fragment)	1	9.09	1	508036	443618	495034	435107	20513	20061	33089	31793	9	10.1	14.9	16.3	-1.1	0.3	-1	0.9	-1.2	0.4	1.1	0.6	-1	0.9	-1.1	0.6	0.2
Q$1718	Q8VDM6-3	HNRL1_MOUSE	Hnrnpul	Isoform 3 of Heterogeneous nuclear ribonucleoprotein U-like protein 1	0.9999	13.53	2	503975	271145	532636	412286	47433	2995	60900	26645	21	2.5	25.6	14.5	-1.9	0.04	1.1	0.7	-1.2	0.3	2	0.05	1.5	0.03	-1.3	0.3	0.001
Q$214	D3Z7G0	D3Z7G0_MOUSE	Ugt1a10	UDP-glucuronosyltransferase 1-7C (Fragment)	1	14.98	2	502990	263687	630183	568584	74556	12461	92761	122660	33.1	10.6	32.9	48.2	-1.9	0.1	1.3	0.7	1.1	0.9	2.4	0.09	2.2	0.2	-1.1	0.9	0.04
Q$1370	Q3UEB3	PUF60_MOUSE	Puf60	Poly(U)-binding-splicing factor PUF60	0.9996	5.67	2	502989	362016	497212	437358	46440	20138	57581	31384	20.6	12.4	25.9	16	-1.4	0.1	-1	0.9	-1.2	0.6	1.4	0.3	1.2	0.3	-1.1	0.6	0.1
Q$1646	Q8C522	ENDD1_MOUSE	Endod1	Endonuclease domain-containing 1 protein	1	9.18	2	501716	449611	576961	529364	64184	33760	70254	72854	28.6	16.8	27.2	30.8	-1.1	0.9	1.1	0.9	1.1	0.9	1.3	0.6	1.2	0.9	-1.1	0.9	0.5
Q$1709	Q8VBT0	TMX1_MOUSE	Tmx1	Thioredoxin-related transmembrane protein 1	0.9999	8.27	2	501486	249374	654568	572189	52747	17191	117972	84730	23.5	15.4	40.3	33.1	-2	0.01	1.3	0.6	1.1	0.7	2.6	0.1	2.3	0.08	-1.1	0.7	0.01
Q$1272	P83870	PHF5A_MOUSE	Phf5a	PHD finger-like domain-containing protein 5A	0.9865	14.55	1	501007	350842	474692	427289	23807	20812	62207	73224	10.6	13.3	29.3	38.3	-1.4	0.009	-1.1	0.9	-1.2	0.8	1.4	0.4	1.2	0.8	-1.1	0.9	0.2
Q$596	P61961	UFM1_MOUSE	Ufm1	Ubiquitin-fold modifier 1	0.9999	58.82	2	498450	427100	539204	527741	22166	44670	24598	29708	9.9	23.4	10.2	12.6	-1.2	0.6	1.1	0.6	1.1	0.7	1.3	0.3	1.2	0.4	-1	0.8	0.09
Q$1703	Q8R326-2	PSPC1_MOUSE	Pspc	Isoform 2 of Paraspeckle component 1	0.9542	4.94	1	497997	248016	568720	572961	26996	83911	66789	68161	12.1	75.7	26.3	26.6	-2	0.1	1.1	0.7	1.2	0.7	2.3	0.1	2.3	0.1	1	1	0.008
Q$1228	P63087-2	PP1G_MOUSE	Ppp1c	Isoform Gamma-2 of Serine/threonine-protein phosphatase PP1-gamma catalytic subunit	1	18.99	4	493608	447369	499444	471391	20025	20825	27764	25715	9.1	10.4	12.4	12.2	-1.1	0.6	1	0.9	-1	0.9	1.1	0.6	1.1	0.9	-1.1	0.9	0.4
Q$1655	Q8CB87	RAB44_MOUSE	Rab44	Ras-related protein Rab-44	1	4	1	493361	225684	537857	376480	56707	21039	65297	30777	25.7	20.8	27.1	18.3	-2.2	0.01	1.1	0.6	-1.3	0.2	2.4	0.03	1.7	0.02	-1.4	0.2	0.001
Q$77	Q08943-2	SSRP1_MOUSE	Ssrp	Isoform 2 of FACT complex subunit SSRP1	0.9014	2.1	1	492423	258708	401345	462543	36817	27010	75603	54983	16.7	23.3	42.1	26.6	-1.9	0.005	-1.2	0.7	-1.1	0.8	1.6	0.4	1.8	0.05	1.2	0.8	0.03
Q$89	D3YX28	D3YX28_MOUSE	Htra2	Serine protease HTRA2, mitochondrial	0.9989	3.6	1	490296	245918	538578	384310	42323	59218	55011	108095	19.3	53.8	22.8	62.9	-2	0.05	1.1	0.7	-1.3	0.7	2.2	0.04	1.6	0.7	-1.4	0.7	0.04
Q$20	A2A9X5	A2A9X5_MOUSE	Nt5c	5'(3')-deoxyribonucleotidase, cytosolic type	0.9993	6.7	1	488987	429338	467325	472631	25441	12829	18127	27789	11.6	6.7	8.7	13.1	-1.1	0.4	-1	0.9	-1	0.9	1.1	0.5	1.1	0.6	1	0.9	0.3
Q$1609	Q8BJU0-2	SGTA_MOUSE	Sgt	Isoform 2 of Small glutamine-rich tetratricopeptide repeat-containing protein alpha	0.9989	7.32	2	486227	300006	539555	396122	24700	27405	74686	40109	11.4	20.4	31	22.6	-1.6	0.006	1.1	0.5	-1.2	0.3	1.8	0.08	1.3	0.3	-1.4	0.3	0.01
Q$1675	Q8K0C4	CP51A_MOUSE	Cyp51a1	Lanosterol 14-alpha demethylase	0.9969	4.97	1	484900	442547	608222	628391	30415	13506	71392	61314	14	6.8	26.2	21.8	-1.1	0.4	1.3	0.4	1.3	0.3	1.4	0.3	1.4	0.2	1	0.8	0.05
Q$699	H3BJ37	H3BJ37_MOUSE	Comtd1	Catechol O-methyltransferase domain-containing protein 1	1	19	2	484345	284124	548021	483754	28744	25065	60181	41981	13.3	19.7	24.6	19.4	-1.7	0.005	1.1	0.7	-1	1	1.9	0.02	1.7	0.02	-1.1	0.7	0.002
Q$512	E9Q3V6	E9Q3V6_MOUSE	Sept2	Septin-2	1	9.03	2	483293	421236	522677	489791	32716	13548	40828	22112	15.1	7.2	17.5	10.1	-1.1	0.4	1.1	0.9	1	0.9	1.2	0.2	1.2	0.2	-1.1	0.9	0.1
Q$1404	Q5SUS9	Q5SUS9_MOUSE	Ewsr1	RNA-binding protein EWS	0.9997	2.57	1	483197	203091	432796	423311	36957	32553	88119	61296	17.1	35.8	45.5	32.4	-2.4	0.003	-1.1	0.8	-1.1	0.8	2.1	0.2	2.1	0.06	-1	0.9	0.02
Q$243	D3Z285	D3Z285_MOUSE	Nfu1	NFU1 iron-sulfur cluster scaffold homolog, mitochondrial (Fragment)	0.9826	7.54	1	482165	365672	451190	441762	50401	17843	54913	80918	23.4	10.9	27.2	41	-1.3	0.3	-1.1	1	-1.1	1	1.2	0.6	1.2	0.9	-1	1	0.5
Q$462	E9PWW2	E9PWW2_MOUSE	Tor1aip1	Torsin-1A-interacting protein 1	0.9997	7.16	2	481484	260554	446404	353005	42528	14413	33860	54455	19.8	12.4	17	34.5	-1.8	0.006	-1.1	0.5	-1.4	0.3	1.7	0.006	1.4	0.4	-1.3	0.4	0.005
Q$1163	P61164	ACTZ_MOUSE	Actr1a	Alpha-centractin	0.9942	2.39	1	480968	364925	590066	435363	46042	46025	47681	65049	21.4	28.2	18.1	33.4	-1.3	0.4	1.2	0.4	-1.1	0.6	1.6	0.06	1.2	0.6	-1.4	0.4	0.05
Q$1566	Q7TS72	IP3KC_MOUSE	Itpkc	Inositol-trisphosphate 3-kinase C	0.9554	3.69	1	478635	257447	457396	411737	70401	16258	68871	70779	32.9	14.1	33.7	38.4	-1.9	0.2	-1	0.9	-1.2	0.9	1.8	0.2	1.6	0.3	-1.1	0.9	0.08
Q$1580	Q80Z19	MUC2_MOUSE	Muc2	Mucin-2 (Fragments)	0.9783	0.49	1	473180	224919	372232	317859	41116	23258	28596	47878	19.4	23.1	17.2	33.7	-2.1	0.005	-1.3	0.2	-1.5	0.1	1.7	0.02	1.4	0.2	-1.2	0.4	0.002
Q$1557	Q78XF5	OSTC_MOUSE	Ostc	Oligosaccharyltransferase complex subunit OSTC	0.9873	8.05	1	470565	430197	320182	282108	210586	144650	42046	31203	100.1	75.2	29.4	24.7	-1.1	0.9	-1.5	0.9	-1.7	0.9	-1.3	0.9	-1.5	0.9	-1.1	0.9	0.7
Q$1894	Q9CYI4	LUC7L_MOUSE	Luc7l	Putative RNA-binding protein Luc7-like 1	0.9996	4.85	2	467912	210687	398689	369299	42103	38830	25443	51832	20.1	41.2	14.3	31.4	-2.2	0.01	-1.2	0.4	-1.3	0.4	1.9	0.02	1.8	0.2	-1.1	0.6	0.003
Q$116	B1ATI0	B1ATI0_MOUSE	Aldh3a2	Aldehyde dehydrogenase	0.9239	2.82	1	467477	304692	376028	362235	103132	30997	49352	59899	49.3	22.7	29.3	37	-1.5	0.7	-1.2	0.9	-1.3	0.9	1.2	0.8	1.2	0.9	-1	0.9	0.4
Q$642	G3UW70	G3UW70_MOUSE	Lamtor5	MCG21719	0.9879	13.79	1	467467	430394	482234	466663	14652	16481	18644	25007	7	8.6	8.6	12	-1.1	0.5	1	0.9	-1	1	1.1	0.4	1.1	0.7	-1	0.9	0.3
Q$483	G3X8V8	G3X8V8_MOUSE	Ripk3	Receptor-interacting serine-threonine kinase 3, isoform CRA_b	0.9719	4.12	1	463732	207906	381357	359955	35514	17977	39119	31677	17.1	19.3	22.9	19.7	-2.2	0.001	-1.2	0.3	-1.3	0.2	1.8	0.02	1.7	0.02	-1.1	0.7	0.0004
Q$1872	Q9CRD2	EMC2_MOUSE	Emc2	ER membrane protein complex subunit 2	0.9089	4.04	1	463683	140205	401725	374264	68516	8699	70941	91035	33	13.9	39.5	54.4	-3.3	0.05	-1.2	0.8	-1.2	0.8	2.9	0.1	2.7	0.2	-1.1	0.8	0.02
Q$453	E9PV58	E9PV58_MOUSE	Tnpo2	Transportin-2	1	2.79	1	461064	317744	457218	432606	80723	40475	50530	96413	39.1	28.5	24.7	49.8	-1.5	0.6	-1	1	-1.1	1	1.4	0.3	1.4	0.8	-1.1	1	0.5
Q$1767	Q922Q1	MOSC2_MOUSE	Marc2	MOSC domain-containing protein 2, mitochondrial	0.9826	9.47	2	458819	449034	495165	479840	45616	28632	31493	43668	22.2	14.3	14.2	20.3	-1	1	1.1	1	1	1	1.1	0.9	1.1	1	-1	1	0.8
Q$746	P12970	RL7A_MOUSE	Rpl7a	60S ribosomal protein L7a	1	7.89	2	454380	191783	543552	439528	47624	9406	69942	68391	23.4	11	28.8	34.8	-2.4	0.03	1.2	0.7	-1	0.9	2.8	0.03	2.3	0.08	-1.2	0.7	0.002
Q$1736	Q91VK2	Q91VK2_MOUSE	Eef1d	Eef1d protein	1	17.39	3	452217	189613	333911	252445	58221	8772	69083	33443	28.8	10.3	46.3	29.6	-2.4	0.06	-1.4	0.4	-1.8	0.09	1.8	0.4	1.3	0.4	-1.3	0.4	0.009
Q$499	E9Q1G8	E9Q1G8_MOUSE	Sept7	Septin-7	0.9779	5.49	1	451590	193675	376554	340681	34359	18093	44959	28362	17	20.9	26.7	18.6	-2.3	0.001	-1.2	0.4	-1.3	0.1	1.9	0.02	1.8	0.01	-1.1	0.5	0.0004
Q$212	D3YYQ4	D3YYQ4_MOUSE	Car1	Carbonic anhydrase 1 (Fragment)	1	13.04	1	449534	387574	1154135	817142	60330	71732	126539	144609	30	41.4	24.5	39.6	-1.2	0.5	2.6	0.005	1.8	0.1	3	0.005	2.1	0.1	-1.4	0.2	0.0003
Q$146	Q9ESX5	DKC1_MOUSE	Dkc1	H/ACA ribonucleoprotein complex subunit 4	0.9999	5.3	2	448186	211883	618999	438845	60091	17721	48079	47090	30	18.7	17.4	24	-2.1	0.06	1.4	0.1	-1	0.9	2.9	0.0003	2.1	0.01	-1.4	0.08	0.0001
Q$1506	Q64514-2	TPP2_MOUSE	Tpp	Isoform Short of Tripeptidyl-peptidase 2	0.9591	2.16	1	448000	253151	464637	391311	49407	43707	50315	57368	24.7	38.6	24.2	32.8	-1.8	0.09	1	0.8	-1.1	0.7	1.8	0.08	1.5	0.3	-1.2	0.7	0.04
Q$1148	P59708	PM14_MOUSE	Sf3b14	Pre-mRNA branch site protein p14	0.9991	11.2	1	447519	314722	452537	372756	38955	24162	77116	35747	19.5	17.2	38.1	21.4	-1.4	0.1	1	1	-1.2	0.6	1.4	0.6	1.2	0.6	-1.2	0.6	0.2
Q$52	A2ALT5	A2ALT5_MOUSE	Ahcy	Adenosylhomocysteinase (Fragment)	1	11.58	1	443126	402382	441971	425089	16608	15948	13937	31457	8.4	8.9	7.1	16.5	-1.1	0.5	-1	1	-1	1	1.1	0.5	1.1	1	-1	1	0.5
Q$866	P07744	K2C4_MOUSE	Krt4	Keratin, type II cytoskeletal 4	0.9488	2.86	1	436254	240141	313318	391334	62479	32176	19790	69882	32	30	14.1	39.9	-1.8	0.1	-1.4	0.4	-1.1	0.6	1.3	0.4	1.6	0.4	1.2	0.6	0.07
Q$70	A2AU61	A2AU61_MOUSE	Raly	RNA-binding protein Raly (Fragment)	1	18.48	3	434995	201930	442363	385622	30259	18779	54442	43830	15.6	20.8	27.5	25.4	-2.2	0.001	1	0.9	-1.1	0.8	2.2	0.02	1.9	0.02	-1.1	0.8	0.002
Q$1782	Q99JR8-2	SMRD2_MOUSE	Smarcd	Isoform 2 of SWI/SNF-related matrix-associated actin-dependent regulator of chromatin subfamily D member 2	0.9996	6.2	2	434578	331626	429309	430357	21851	12591	74022	64872	11.2	8.5	38.6	33.7	-1.3	0.02	-1	1	-1	1	1.3	0.7	1.3	0.7	1	1	0.4
Q$1122	P53702	CCHL_MOUSE	Hccs	Cytochrome c-type heme lyase	0.9999	5.51	1	433241	252867	477572	407564	44987	64681	67396	41042	23.2	57.2	31.6	22.5	-1.7	0.2	1.1	0.8	-1.1	0.8	1.9	0.2	1.6	0.3	-1.2	0.8	0.06
Q$97	D3Z1I3	D3Z1I3_MOUSE	Gm8325	MCG49525	1	11.56	2	432779	269721	398165	375989	34311	42277	38683	33127	17.7	35	21.7	19.7	-1.6	0.1	-1.1	0.8	-1.2	0.6	1.5	0.2	1.4	0.3	-1.1	0.8	0.04
Q$493	G3X9I1	G3X9I1_MOUSE	Fam3c	DNA segment, Chr 6, Wayne State University 176, expressed, isoform CRA_a	0.9999	12.69	2	431743	261029	412545	391193	32270	14594	39412	31468	16.7	12.5	21.4	18	-1.7	0.008	-1	0.9	-1.1	0.8	1.6	0.03	1.5	0.03	-1.1	0.9	0.005
Q$294	D6RGN4	D6RGN4_MOUSE	Ndufv2	NADH dehydrogenase [ubiquinone] flavoprotein 2, mitochondrial (Fragment)	1	44.83	1	431313	192317	506961	357035	21896	10774	76958	52395	11.4	12.5	33.9	32.8	-2.2	6e-05	1.2	0.4	-1.2	0.4	2.6	0.07	1.9	0.1	-1.4	0.4	0.002
Q$1499	Q64281-2	LIRB4_MOUSE	Lilrb	Isoform 2 of Leukocyte immunoglobulin-like receptor subfamily B member 4	0.9786	4.73	1	428811	412420	457565	510964	36035	18395	39929	37551	18.8	10	19.5	16.4	-1	0.8	1.1	0.8	1.2	0.6	1.1	0.8	1.2	0.2	1.1	0.8	0.2
Q$1634	Q8BVY0	Q8BVY0_MOUSE	Rsl1d1	Protein Rsl1d1	1	4.87	2	428802	372839	543414	435118	42235	46773	49548	42177	22	28.1	20.4	21.7	-1.2	0.7	1.3	0.5	1	0.9	1.5	0.2	1.2	0.7	-1.2	0.5	0.1
Q$1925	Q9D1J3	SARNP_MOUSE	Sarnp	SAP domain-containing ribonucleoprotein	0.976	9.05	1	421670	263471	398307	347897	49317	17814	52131	47786	26.2	15.1	29.3	30.7	-1.6	0.1	-1.1	0.8	-1.2	0.7	1.5	0.2	1.3	0.4	-1.1	0.7	0.09
Q$617	Q8BJY1	PSMD5_MOUSE	Psmd5	26S proteasome non-ATPase regulatory subunit 5	0.998	2.98	1	419365	588757	1652100	737824	55709	208056	667699	373230	29.7	79	90.4	113.1	1.4	0.8	3.9	0.6	1.8	0.8	2.8	0.7	1.3	0.8	-2.2	0.7	0.2
Q$1727	Q8VI75	IPO4_MOUSE	Ipo4	Importin-4	0.9305	1.02	1	417335	205091	359546	305185	20452	21608	22015	44387	11	23.6	13.7	32.5	-2	0.0006	-1.2	0.2	-1.4	0.2	1.8	0.005	1.5	0.2	-1.2	0.3	0.0007
Q$1916	Q9D103	IFM1_MOUSE	Ifitm1	Interferon-induced transmembrane protein 1	0.9884	15.09	1	416940	272907	316856	329413	35614	23841	36696	41963	19.1	19.5	25.9	28.5	-1.5	0.06	-1.3	0.4	-1.3	0.5	1.2	0.6	1.2	0.6	1	0.8	0.06
Q$1746	Q91XV3	BASP1_MOUSE	Basp1	Brain acid soluble protein 1	0.9331	13.72	1	416923	273672	373394	335615	38275	6114	14509	22452	20.5	5	8.7	15	-1.5	0.09	-1.1	0.4	-1.2	0.3	1.4	0.001	1.2	0.2	-1.1	0.4	0.004
Q$1891	Q9CY64	BIEA_MOUSE	Blvra	Biliverdin reductase A	0.9961	4.75	1	416562	267882	411443	365170	25005	16714	29672	36979	13.4	14	16.1	22.6	-1.6	0.007	-1	0.9	-1.1	0.6	1.5	0.01	1.4	0.2	-1.1	0.6	0.006
Q$1289	P97377-2	CDK2_MOUSE	Cdk	Isoform CDK2-alpha of Cyclin-dependent kinase 2	0.9998	8.39	1	414616	152129	452929	423522	29840	7737	64435	67345	16.1	11.4	31.8	35.6	-2.7	0.004	1.1	0.9	1	0.9	3	0.04	2.8	0.06	-1.1	0.9	0.002
Q$563	F6Q2E3	F6Q2E3_MOUSE	Psmc3	26S protease regulatory subunit 6A (Fragment)	1	14.29	2	414593	190565	472535	369789	17873	12871	46666	34518	9.6	15.1	22.1	20.9	-2.2	4e-05	1.1	0.5	-1.1	0.5	2.5	0.01	1.9	0.006	-1.3	0.3	6e-05
Q$164	D3YU46	D3YU46_MOUSE	Gm10923	Protein Gm10923	1	18.95	2	414045	360651	378365	352231	32567	17104	22372	25869	17.6	10.6	13.2	16.4	-1.1	0.7	-1.1	0.9	-1.2	0.7	1	0.9	-1	0.9	-1.1	0.9	0.3
Q$1647	Q8C5R8	Q8C5R8_MOUSE	Prps1l1	Protein Prps1l1	1	7.86	2	412180	312595	347405	321509	93415	23948	15570	31334	50.7	17.1	10	21.8	-1.3	0.9	-1.2	0.9	-1.3	0.9	1.1	0.8	1	0.9	-1.1	0.9	0.5
Q$1033	P32921-2	SYWC_MOUSE	War	Isoform 2 of Tryptophan--tRNA ligase, cytoplasmic	0.9826	3.58	1	411462	313036	396524	332148	39939	15885	9667	31089	21.7	11.3	5.5	20.9	-1.3	0.2	-1	0.8	-1.2	0.4	1.3	0.01	1.1	0.8	-1.2	0.4	0.05
Q$1536	Q6PEB6	PHOCN_MOUSE	Mob4	MOB-like protein phocein	0.9413	13.33	1	410768	198266	360732	344520	34850	21433	44943	38994	19	24.2	27.9	25.3	-2.1	0.005	-1.1	0.6	-1.2	0.6	1.8	0.05	1.7	0.05	-1	0.8	0.005
Q$289	D6RDE2	D6RDE2_MOUSE	Fkbp4	Peptidyl-prolyl cis-trans isomerase	1	7.81	1	410471	409100	458235	415369	19501	11566	19066	54330	10.6	6.3	9.3	29.2	-1	1	1.1	0.5	1	1	1.1	0.3	1	1	-1.1	0.9	0.6
Q$1337	Q3TBW2	RM10_MOUSE	Mrpl10	39S ribosomal protein L10, mitochondrial	1	7.25	1	409153	213142	536072	543623	61992	41513	60961	51647	33.9	43.6	25.4	21.2	-1.9	0.1	1.3	0.4	1.3	0.4	2.5	0.01	2.6	0.006	1	0.9	0.002
Q$795	O54941	SMCE1_MOUSE	Smarce1	SWI/SNF-related matrix-associated actin-dependent regulator of chromatin subfamily E member 1	0.9448	3.16	1	407737	263636	394543	349213	38260	19394	37786	20613	21	16.4	21.4	13.2	-1.5	0.06	-1	0.8	-1.2	0.5	1.5	0.07	1.3	0.07	-1.1	0.5	0.02
Q$254	D3Z4I5	D3Z4I5_MOUSE	Dnajc8	DnaJ homolog subfamily C member 8	0.9997	34.12	1	402175	146490	380425	316001	8185	29931	37214	33573	4.6	45.7	21.9	23.8	-2.7	0.004	-1.1	0.6	-1.3	0.2	2.6	0.006	2.2	0.02	-1.2	0.4	6e-05
Q$1833	Q9CPT5	NOP16_MOUSE	Nop16	Nucleolar protein 16	0.9997	8.99	1	401064	186331	337285	288575	48386	29923	64372	47493	27	35.9	42.7	36.8	-2.2	0.03	-1.2	0.7	-1.4	0.4	1.8	0.3	1.5	0.4	-1.2	0.7	0.04
Q$616	F7B7L8	F7B7L8_MOUSE	Psmd3	26S proteasome non-ATPase regulatory subunit 3 (Fragment)	1	12.16	2	398025	292042	376856	380303	19248	22563	14696	19647	10.8	17.3	8.7	11.6	-1.4	0.04	-1.1	0.8	-1	0.8	1.3	0.07	1.3	0.07	1	0.9	0.006
Q$124	B1AWD8	B1AWD8_MOUSE	Clta	Clathrin light chain A	0.9751	2.97	1	393740	129614	400947	322989	76681	25338	50237	64095	43.5	43.7	28	44.4	-3	0.06	1	0.9	-1.2	0.7	3.1	0.008	2.5	0.09	-1.2	0.7	0.01
Q$858	P05555-2	ITAM_MOUSE	Itga	Isoform 2 of Integrin alpha-M	1	3.28	3	392347	205521	368282	316633	29393	10770	24923	26299	16.8	11.7	15.1	18.6	-1.9	0.002	-1.1	0.5	-1.2	0.2	1.8	0.002	1.5	0.02	-1.2	0.3	0.0002
Q$1394	Q52KR3-6	PRUN2_MOUSE	Prune	Isoform 6 of Protein prune homolog 2	0.9909	0.69	1	392089	278335	501675	417765	34645	67802	81292	41950	19.8	54.5	36.2	22.5	-1.4	0.5	1.3	0.6	1.1	0.6	1.8	0.3	1.5	0.5	-1.2	0.6	0.1
Q$813	O70591	PFD2_MOUSE	Pfdn2	Prefoldin subunit 2	0.9797	7.79	1	390395	290683	362682	325921	21812	34699	23801	31840	12.5	26.7	14.7	21.8	-1.3	0.2	-1.1	0.8	-1.2	0.5	1.2	0.5	1.1	0.8	-1.1	0.8	0.1
Q$627	F8WHP8	F8WHP8_MOUSE	Atp5j2	ATP synthase subunit f, mitochondrial	1	15.79	1	390018	416097	431947	384977	49968	48324	49780	26398	28.6	26	25.8	15.3	1.1	1	1.1	1	-1	1	1	1	-1.1	1	-1.1	1	0.9
Q$1220	P63005	LIS1_MOUSE	Pafah1b1	Platelet-activating factor acetylhydrolase IB subunit alpha	0.996	5.12	1	389809	294729	365170	341113	19958	6148	22797	30606	11.4	4.7	14	20.1	-1.3	0.04	-1.1	0.7	-1.1	0.6	1.2	0.2	1.2	0.6	-1.1	0.7	0.04
Q$69	A2AU60	A2AU60_MOUSE	Raly	RNA-binding protein Raly (Fragment)	1	14.89	2	386685	171300	397136	344263	29122	16824	52926	43837	16.8	22	29.8	28.5	-2.3	0.001	1	0.9	-1.1	0.8	2.3	0.04	2	0.03	-1.2	0.8	0.002
Q$2069	Q9WTR1	TRPV2_MOUSE	Trpv2	Transient receptor potential cation channel subfamily V member 2	0.93	1.85	1	385676	487012	332408	402385	72273	250760	40384	66265	41.9	115.1	27.2	36.8	1.3	1	-1.2	1	1	1	-1.5	1	-1.2	1	1.2	1	0.9
Q$1537	Q6PF96	Q6PF96_MOUSE	Etfdh	Electron transfer flavoprotein-ubiquinone oxidoreductase, mitochondrial	0.9535	3.42	1	380643	404375	344988	381628	54297	53329	39758	19960	31.9	29.5	25.8	11.7	1.1	1	-1.1	1	1	1	-1.2	1	-1.1	1	1.1	1	0.8
Q$1388	Q3UZ39-3	LRRF1_MOUSE	Lrrfip	Isoform 3 of Leucine-rich repeat flightless-interacting protein 1	0.9989	6.33	1	380085	165688	342358	317532	43364	16837	65664	44551	25.5	22.7	42.9	31.4	-2.3	0.01	-1.1	0.9	-1.2	0.7	2.1	0.2	1.9	0.06	-1.1	0.9	0.02
Q$248	D3Z3G6	D3Z3G6_MOUSE	Mapk3	Mitogen-activated protein kinase 3	0.9755	4.47	1	379787	336124	326937	288449	28948	23214	21901	27700	17	15.4	15	21.5	-1.1	0.6	-1.2	0.6	-1.3	0.3	-1	0.8	-1.2	0.6	-1.1	0.6	0.1
Q$75	Q3UHC7-2	DAB2P_MOUSE	Dab2i	Isoform 2 of Disabled homolog 2-interacting protein	0.9814	9.2	2	374824	266304	348849	355342	26573	24117	34672	36393	15.9	20.3	22.2	22.9	-1.4	0.09	-1.1	0.9	-1.1	0.9	1.3	0.3	1.3	0.3	1	0.9	0.1
Q$1638	Q8BX10-2	PGAM5_MOUSE	Pgam	Isoform 2 of Serine/threonine-protein phosphatase PGAM5, mitochondrial	0.9216	4.18	1	374780	157533	368423	305565	33772	4721	40470	35709	20.1	6.7	24.6	26.1	-2.4	0.02	-1	0.9	-1.2	0.5	2.3	0.03	1.9	0.05	-1.2	0.5	0.0006
Q$1381	Q3UM45	PP1R7_MOUSE	Ppp1r7	Protein phosphatase 1 regulatory subunit 7	0.9999	4.99	2	373211	201318	521275	352015	52025	7214	72566	57510	31.2	8	31.1	36.5	-1.9	0.1	1.4	0.3	-1.1	0.8	2.6	0.07	1.7	0.2	-1.5	0.3	0.006
Q$1360	Q3U1J4	DDB1_MOUSE	Ddb1	DNA damage-binding protein 1	0.9999	2.63	1	371588	248391	367229	383501	20137	45066	48254	29095	12.1	40.6	29.4	17	-1.5	0.2	-1	1	1	1	1.5	0.4	1.5	0.2	1	1	0.07
Q$501	E9Q1P8	I2BP2_MOUSE	Irf2bp2	Interferon regulatory factor 2-binding protein 2	0.95	2.63	1	368136	163917	322733	338611	12859	8580	57946	27253	7.8	11.7	40.1	18	-2.2	6e-06	-1.1	0.7	-1.1	0.7	2	0.2	2.1	0.01	1	0.8	0.002
Q$1032	P32067	LA_MOUSE	Ssb	Lupus La protein homolog	1	9.16	3	367067	250426	379387	320577	28401	17532	15003	35183	17.3	15.7	8.8	24.5	-1.5	0.04	1	0.7	-1.1	0.6	1.5	0.003	1.3	0.4	-1.2	0.4	0.01
Q$1686	Q8K482	EMIL2_MOUSE	Emilin2	EMILIN-2	0.9939	1.21	1	365905	141873	362312	215556	53114	23491	68205	32599	32.5	37	42.1	33.8	-2.6	0.03	-1	1	-1.7	0.2	2.6	0.08	1.5	0.2	-1.7	0.2	0.009
Q$1650	Q8C7X2-2	EMC1_MOUSE	Emc	Isoform 2 of ER membrane protein complex subunit 1	0.9992	1.81	1	359537	128229	318687	290250	53730	6767	42879	46281	33.4	11.8	30.1	35.7	-2.8	0.06	-1.1	0.8	-1.2	0.7	2.5	0.06	2.3	0.09	-1.1	0.8	0.006
Q$631	F8WII3	F8WII3_MOUSE	Dpm1	Dolichol-phosphate mannosyltransferase (Fragment)	0.9998	11.57	1	358604	265818	326905	294500	39791	23097	9669	19806	24.8	19.4	6.6	15	-1.3	0.3	-1.1	0.6	-1.2	0.5	1.2	0.2	1.1	0.6	-1.1	0.5	0.1
Q$2042	Q9QYF1	RDH11_MOUSE	Rdh11	Retinol dehydrogenase 11	1	4.11	1	354969	163162	353458	362837	31184	14427	25256	71265	19.6	19.8	16	43.9	-2.2	0.003	-1	1	1	1	2.2	0.001	2.2	0.2	1	1	0.009
Q$1175	P62141	PP1B_MOUSE	Ppp1cb	Serine/threonine-protein phosphatase PP1-beta catalytic subunit	1	16.51	3	352029	316041	344247	342593	8821	13251	23660	16031	5.6	9.4	15.4	10.5	-1.1	0.3	-1	0.9	-1	0.9	1.1	0.8	1.1	0.7	-1	1	0.5
Q$522	E9Q5A0	E9Q5A0_MOUSE	Rpl13a	60S ribosomal protein L13a	1	5.44	2	351192	295814	358192	397316	22077	23590	41841	45697	14.1	17.8	26.1	25.7	-1.2	0.5	1	0.9	1.1	0.8	1.2	0.6	1.3	0.4	1.1	0.8	0.3
Q$590	F6WP10	F6WP10_MOUSE	Fkbp8	Peptidyl-prolyl cis-trans isomerase FKBP8 (Fragment)	1	44.44	1	349427	322619	356097	344912	36103	10226	39649	20465	23.1	7.1	24.9	13.3	-1.1	1	1	1	-1	1	1.1	1	1.1	0.9	-1	1	0.9
Q$63	A2AR07	A2AR07_MOUSE	Ssb	Lupus La protein homolog (Fragment)	1	14.67	2	341780	240477	364209	310230	28359	15970	18592	34996	18.6	14.8	11.4	25.2	-1.4	0.07	1.1	0.8	-1.1	0.8	1.5	0.006	1.3	0.4	-1.2	0.5	0.02
Q$553	E9QB02	E9QB02_MOUSE	Mars	Methionine--tRNA ligase, cytoplasmic	0.9796	1.43	1	340381	159497	370940	334983	19119	19589	78612	57559	12.6	27.5	47.4	38.4	-2.1	0.001	1.1	1	-1	1	2.3	0.2	2.1	0.1	-1.1	1	0.04
Q$570	F6RJ83	F6RJ83_MOUSE	Ndufs2	NADH dehydrogenase [ubiquinone] iron-sulfur protein 2, mitochondrial (Fragment)	1	9.24	2	340225	129615	385415	358729	30715	9946	51677	40442	20.2	17.2	30	25.2	-2.6	0.001	1.1	0.9	1.1	0.9	3	0.03	2.8	0.02	-1.1	0.9	0.0005
Q$67	Q9CZ44-3	NSF1C_MOUSE	Nsfl1	Isoform 3 of NSFL1 cofactor p47	0.9999	10.22	2	340109	278935	328657	344050	19723	20395	22655	22129	13	16.3	15.4	14.4	-1.2	0.3	-1	1	1	1	1.2	0.5	1.2	0.3	1	1	0.2
Q$845	P02798	MT2_MOUSE	Mt2	Metallothionein-2	0.9838	19.67	1	338222	190632	392719	331479	42804	25372	26646	39726	28.3	29.8	15.2	26.8	-1.8	0.08	1.2	0.6	-1	0.9	2.1	0.003	1.7	0.08	-1.2	0.6	0.005
Q$1710	Q8VBZ3	CLPT1_MOUSE	Clptm1	Cleft lip and palate transmembrane protein 1 homolog	0.9548	4.22	1	337480	263507	357012	315975	21454	7546	19354	35328	14.2	6.4	12.1	25	-1.3	0.06	1.1	0.8	-1.1	0.8	1.4	0.01	1.2	0.6	-1.1	0.7	0.06
Q$1574	Q80X50-2	UBP2L_MOUSE	Ubap2	Isoform 2 of Ubiquitin-associated protein 2-like	0.978	2.37	2	337136	279336	408745	315069	42472	39775	36837	33040	28.2	31.8	20.2	23.4	-1.2	0.7	1.2	0.7	-1.1	0.8	1.5	0.2	1.1	0.8	-1.3	0.4	0.1
Q$175	D3YV67	D3YV67_MOUSE	Tmem165	Transmembrane protein 165 (Fragment)	0.9677	20	1	336755	339220	316198	324138	24361	13419	28867	30251	16.2	8.8	20.4	20.9	1	1	-1.1	1	-1	1	-1.1	1	-1	1	1	1	0.9
Q$273	D3Z6W9	D3Z6W9_MOUSE	Ndufb5	NADH dehydrogenase [ubiquinone] 1 beta subcomplex subunit 5, mitochondrial	0.9943	6.08	1	335270	190633	350716	355003	39879	19730	39630	75032	26.6	23.1	25.3	47.3	-1.8	0.06	1	1	1.1	1	1.8	0.04	1.9	0.3	1	1	0.08
Q$527	E9Q5L3	E9Q5L3_MOUSE	Acadsb	Short/branched chain-specific acyl-CoA dehydrogenase, mitochondrial	1	7.53	2	334989	169047	421479	291689	40333	8924	108096	25226	26.9	11.8	57.3	19.3	-2	0.06	1.3	0.7	-1.1	0.7	2.5	0.3	1.7	0.01	-1.4	0.7	0.05
Q$1522	Q6IRU5-2	CLCB_MOUSE	Clt	Isoform 2 of Clathrin light chain B	0.9372	4.74	1	333443	113703	329675	250148	56175	8356	59133	32007	37.7	16.4	40.1	28.6	-2.9	0.08	-1	1	-1.3	0.5	2.9	0.08	2.2	0.07	-1.3	0.5	0.009
Q$872	P08122	CO4A2_MOUSE	Col4a2	Collagen alpha-2(IV) chain	0.9132	1.29	1	333341	187257	295330	296145	25985	29614	47219	28986	17.4	35.4	35.8	21.9	-1.8	0.04	-1.1	0.8	-1.1	0.7	1.6	0.3	1.6	0.1	1	1	0.04
Q$246	Q80XN0	BDH_MOUSE	Bdh1	D-beta-hydroxybutyrate dehydrogenase, mitochondrial	0.9991	9.04	2	333117	264966	287591	402243	81364	20070	25612	71756	54.6	16.9	19.9	39.9	-1.3	0.9	-1.2	0.9	1.2	0.9	1.1	0.9	1.5	0.6	1.4	0.6	0.4
Q$1532	Q6P8N8	Q6P8N8_MOUSE	Clpx	ATP-dependent Clp protease ATP-binding subunit clpX-like, mitochondrial	0.9986	2.1	1	332079	160895	267344	306406	26276	16482	17179	51717	17.7	22.9	14.4	37.7	-2.1	0.003	-1.2	0.2	-1.1	0.7	1.7	0.01	1.9	0.2	1.1	0.7	0.007
Q$2004	Q9ES46	PARVB_MOUSE	Parvb	Beta-parvin	0.9077	3.84	1	331660	181353	391400	305848	20445	14870	24752	45022	13.8	18.3	14.1	32.9	-1.8	0.002	1.2	0.3	-1.1	0.6	2.2	0.0005	1.7	0.1	-1.3	0.3	0.0008
Q$274	D3Z765	D3Z765_MOUSE	Luc7l	Putative RNA-binding protein Luc7-like 1 (Fragment)	0.9996	5.81	1	330919	158838	286521	256953	33023	43093	11092	44387	22.3	60.7	8.7	38.6	-2.1	0.08	-1.2	0.5	-1.3	0.5	1.8	0.2	1.6	0.5	-1.1	0.5	0.02
Q$954	P17897	LYZ1_MOUSE	Lyz1	Lysozyme C-1	0.9816	16.89	1	329096	299071	427995	423088	55684	31550	73083	56058	37.8	23.6	38.2	29.6	-1.1	0.9	1.3	0.7	1.3	0.7	1.4	0.5	1.4	0.4	-1	1	0.3
Q$1721	Q8VDP4	CCAR2_MOUSE	Ccar2	Cell cycle and apoptosis regulator protein 2	0.9232	1.63	1	327116	239043	374908	395410	29368	34375	53828	59750	20.1	32.2	32.1	33.8	-1.4	0.3	1.1	0.7	1.2	0.7	1.6	0.3	1.7	0.3	1.1	0.8	0.1
Q$259	D3Z4N9	D3Z4N9_MOUSE	Far1	Fatty acyl-CoA reductase 1 (Fragment)	1	5.8	1	325203	170789	329373	320742	14938	5645	18145	20632	10.3	7.4	12.3	14.4	-1.9	7e-05	1	1	-1	1	1.9	0.003	1.9	0.005	-1	1	4e-06
Q$1666	Q8CIH9	Q8CIH9_MOUSE	Ppat	Amidophosphoribosyltransferase	0.9455	3.29	1	324935	225104	324839	286716	49660	16691	32726	31954	34.2	16.6	22.5	24.9	-1.4	0.4	-1	1	-1.1	0.8	1.4	0.1	1.3	0.4	-1.1	0.8	0.2
Q$1478	Q62241	RU1C_MOUSE	Snrpc	U1 small nuclear ribonucleoprotein C	0.9914	13.21	1	324518	251400	349508	384883	37539	38719	34474	39284	25.9	34.4	22.1	22.8	-1.3	0.6	1.1	0.8	1.2	0.7	1.4	0.4	1.5	0.2	1.1	0.8	0.1
Q$130	B1AYQ0	B1AYQ0_MOUSE	Rsu1	Ras suppressor protein 1 (Fragment)	1	10.71	1	324230	96729	315347	294073	62108	12843	67757	60868	42.8	29.7	48	46.3	-3.4	0.1	-1	1	-1.1	1	3.3	0.1	3	0.1	-1.1	1	0.03
Q$1738	Q91VR5	DDX1_MOUSE	Ddx1	ATP-dependent RNA helicase DDX1	0.9508	1.49	1	324146	244296	293232	330463	22292	6999	14429	33143	15.4	6.4	11	22.4	-1.3	0.1	-1.1	0.6	1	0.9	1.2	0.09	1.4	0.2	1.1	0.6	0.05
Q$672	G3UZL6	G3UZL6_MOUSE	Ube2i	SUMO-conjugating enzyme UBC9	1	30.69	2	324132	290034	313453	291352	23521	135970	36110	31536	16.2	104.8	25.8	24.2	-1.1	1	-1	1	-1.1	1	1.1	1	1	1	-1.1	1	1
Q$576	F6TPX8	F6TPX8_MOUSE	Ap2a1	AP-2 complex subunit alpha-1 (Fragment)	1	8.83	1	323875	106176	329037	274339	30763	8385	39658	33177	21.2	17.7	27	27	-3.1	0.009	1	0.9	-1.2	0.7	3.1	0.02	2.6	0.02	-1.2	0.7	0.0002
Q$581	Q9R0Q3	TMED2_MOUSE	Tmed2	Transmembrane emp24 domain-containing protein 2	1	10.95	2	322564	155491	267613	254007	33847	12645	27603	33618	23.5	18.2	23.1	29.6	-2.1	0.01	-1.2	0.5	-1.3	0.5	1.7	0.03	1.6	0.1	-1.1	0.8	0.006
Q$264	D3Z5B1	D3Z5B1_MOUSE	2410018M08Rik	Protein 2410018M08Rik (Fragment)	1	20.11	2	322026	192716	320770	313598	37512	2559	21169	36049	26	3	14.8	25.7	-1.7	0.1	-1	1	-1	1	1.7	0.02	1.6	0.1	-1	1	0.01
Q$171	D3YUM8	D3YUM8_MOUSE	Gm4950	Proteasome subunit beta type	1	7.8	1	319240	246336	291015	284038	24635	14069	21104	33828	17.3	12.8	16.2	26.6	-1.3	0.2	-1.1	0.8	-1.1	0.8	1.2	0.5	1.2	0.8	-1	0.9	0.3
Q$517	E9Q4B5	E9Q4B5_MOUSE	Ccdc58	Coiled-coil domain-containing protein 58	0.9615	14.71	1	318925	268558	300910	304845	19977	9050	11848	26176	14	7.5	8.8	19.2	-1.2	0.3	-1.1	0.8	-1	0.9	1.1	0.3	1.1	0.6	1	0.9	0.3
Q$1754	Q91Z98	CH3L4_MOUSE	Chi3l4	Chitinase-3-like protein 4	1	4.23	1	318675	193795	265891	229979	49442	25771	14772	32039	34.7	29.7	12.4	31.2	-1.6	0.2	-1.2	0.7	-1.4	0.5	1.4	0.2	1.2	0.7	-1.2	0.7	0.09
Q$435	E0CXD9	E0CXD9_MOUSE	Surf4	Surfeit locus protein 4	1	21.95	1	317047	115809	345732	226272	41851	24404	68598	36100	29.5	47.1	44.4	35.7	-2.7	0.02	1.1	0.7	-1.4	0.4	3	0.07	2	0.1	-1.5	0.4	0.01
Q$1036	P34960	MMP12_MOUSE	Mmp12	Macrophage metalloelastase	0.9959	2.54	1	316663	248303	290351	262022	23527	11846	33835	22188	16.6	10.7	26.1	18.9	-1.3	0.2	-1.1	0.9	-1.2	0.5	1.2	0.7	1.1	0.9	-1.1	0.9	0.2
Q$686	Q8CAY6	THIC_MOUSE	Acat2	Acetyl-CoA acetyltransferase, cytosolic	0.9999	14.36	2	314625	344204	348496	316236	9029	28466	18316	30263	6.4	18.5	11.8	21.4	1.1	0.9	1.1	0.6	1	1	1	1	-1.1	0.9	-1.1	0.9	0.6
Q$1818	Q99MZ6	MYO7B_MOUSE	Myo7b	Unconventional myosin-VIIb	0.9566	0.95	1	312539	1090185	1044845	636287	48052	314901	466132	211201	34.4	64.6	99.8	74.2	3.5	0.3	3.3	0.7	2	0.7	-1	0.9	-1.7	0.7	-1.6	0.7	0.3
Q$1649	Q8C6I2-2	SDHF2_MOUSE	Sdhaf	Isoform 2 of Succinate dehydrogenase assembly factor 2, mitochondrial	0.9035	10.45	1	311683	194366	304270	306061	40001	25396	27878	49025	28.7	29.2	20.5	35.8	-1.6	0.2	-1	1	-1	1	1.6	0.1	1.6	0.3	1	1	0.1
Q$209	Q3U125	Q3U125_MOUSE	Fam213a	Redox-regulatory protein FAM213A	0.9539	5.68	1	311433	306795	386700	283933	32347	66524	12988	26642	23.2	48.5	7.5	21	-1	1	1.2	0.3	-1.1	0.9	1.3	0.8	-1.1	0.9	-1.4	0.05	0.3
Q$739	Q99KP6-2	PRP19_MOUSE	Prpf1	Isoform 2 of Pre-mRNA-processing factor 19	1	6.5	2	310845	178881	413406	290885	25966	11573	70423	46660	18.7	14.5	38.1	35.9	-1.7	0.01	1.3	0.5	-1.1	0.7	2.3	0.1	1.6	0.3	-1.4	0.5	0.02
Q$460	E9PWD0	E9PWD0_MOUSE	Ap2a1	AP-2 complex subunit alpha-1	1	26.32	1	310178	173344	304930	247563	48346	24789	36850	50105	34.9	32	27	45.3	-1.8	0.2	-1	0.9	-1.3	0.8	1.8	0.1	1.4	0.6	-1.2	0.8	0.1
Q$1886	Q9CXW2	RT22_MOUSE	Mrps22	28S ribosomal protein S22, mitochondrial	0.9976	3.34	1	309946	247381	337577	285298	37017	17421	27111	23569	26.7	15.7	18	18.5	-1.3	0.6	1.1	0.8	-1.1	0.8	1.4	0.1	1.2	0.6	-1.2	0.6	0.2
Q$233	Q62393-2	TPD52_MOUSE	Tpd5	Isoform 2 of Tumor protein D52	1	17.84	2	307500	135764	275884	202983	22010	13818	36577	28896	16	22.8	29.6	31.8	-2.3	0.001	-1.1	0.5	-1.5	0.08	2	0.04	1.5	0.2	-1.4	0.3	0.001
Q$634	P39054-2	DYN2_MOUSE	Dnm	Isoform 2 of Dynamin-2	0.9996	3.35	1	304116	113654	384571	350894	35007	19818	65696	36333	25.7	39	38.2	23.2	-2.7	0.007	1.3	0.7	1.2	0.7	3.4	0.05	3.1	0.003	-1.1	0.7	0.002
Q$103	B0QZN5	B0QZN5_MOUSE	Vamp2	Vesicle-associated membrane protein 2	0.9999	14.72	1	303297	273913	304448	303810	14198	6473	15810	21297	10.5	5.3	11.6	15.7	-1.1	0.5	1	1	1	1	1.1	0.5	1.1	0.7	-1	1	0.4
Q$651	G3UWW7	G3UWW7_MOUSE	Psmd11	26S proteasome non-ATPase regulatory subunit 11 (Fragment)	1	7.59	1	301473	242204	356510	223821	29138	21187	36619	28927	21.6	19.6	23	28.9	-1.2	0.4	1.2	0.5	-1.3	0.3	1.5	0.1	-1.1	0.6	-1.6	0.1	0.02
Q$31	Q6PGJ3	Q6PGJ3_MOUSE	L1cam	L1 cell adhesion molecule	0.9413	0.79	1	301132	95180	297647	251581	38370	10177	40781	31686	28.5	23.9	30.6	28.2	-3.2	0.03	-1	1	-1.2	0.7	3.1	0.03	2.6	0.03	-1.2	0.7	0.001
Q$2035	Q9QXK3-3	COPG2_MOUSE	Copg	Isoform 3 of Coatomer subunit gamma-2	1	3.14	1	300786	106606	246919	199040	31793	15823	41854	34374	23.6	33.2	37.9	38.6	-2.8	0.004	-1.2	0.6	-1.5	0.2	2.3	0.07	1.9	0.2	-1.2	0.6	0.004
Q$542	Q9JLV6-2	PNKP_MOUSE	Pnk	Isoform 2 of Bifunctional polynucleotide phosphatase/kinase	0.9293	2.42	1	300216	116058	343112	251701	31077	21470	56429	14285	23.1	41.4	36.8	12.7	-2.6	0.006	1.1	0.5	-1.2	0.5	3	0.02	2.2	0.005	-1.4	0.5	0.002
Q$1630	Q8BTW3	EXOS6_MOUSE	Exosc6	Exosome complex component MTR3	0.9933	5.86	1	299604	202179	285812	274016	33012	13834	30492	32780	24.6	15.3	23.9	26.7	-1.5	0.1	-1	0.9	-1.1	0.9	1.4	0.2	1.4	0.3	-1	0.9	0.1
Q$1948	Q9D880	TIM50_MOUSE	Timm50	Mitochondrial import inner membrane translocase subunit TIM50	0.9773	3.12	1	299366	194344	313970	299049	32972	40697	14822	32871	24.6	46.8	10.6	24.6	-1.5	0.3	1	1	-1	1	1.6	0.1	1.5	0.3	-1	1	0.06
Q$735	P48024	EIF1_MOUSE	Eif1	Eukaryotic translation initiation factor 1	0.9481	21.24	1	299094	309871	331457	273036	17707	23359	29401	32001	13.2	16.9	19.8	26.2	1	0.9	1.1	0.9	-1.1	0.9	1.1	0.9	-1.1	0.9	-1.2	0.8	0.5
Q$57	A2AN81	A2AN81_MOUSE	Dkc1	H/ACA ribonucleoprotein complex subunit 4 (Fragment)	0.9999	9.66	1	298065	107964	353078	277428	38212	16377	32668	34235	28.7	33.9	20.7	27.6	-2.8	0.009	1.2	0.5	-1.1	0.7	3.3	0.0009	2.6	0.009	-1.3	0.4	0.0003
Q$1159	P61028	RAB8B_MOUSE	Rab8b	Ras-related protein Rab-8B	1	12.56	2	297215	282804	302552	310508	10006	27934	24085	11956	7.5	22.1	17.8	8.6	-1.1	1	1	1	1	0.9	1.1	1	1.1	0.9	1	1	0.8
Q$1981	Q9DCF9-2	SSRG_MOUSE	Ssr	Isoform 2 of Translocon-associated protein subunit gamma	0.9775	7.82	1	296415	233231	378888	317264	12789	41373	27080	42384	9.6	39.7	16	29.9	-1.3	0.6	1.3	0.1	1.1	0.7	1.6	0.1	1.4	0.6	-1.2	0.6	0.05
Q$1610	Q8BJW6-2	EIF2A_MOUSE	Eif2	Isoform 2 of Eukaryotic translation initiation factor 2A	0.9808	5.75	2	294308	218443	309435	265307	23712	12691	20839	23276	18	13	15.1	19.6	-1.3	0.1	1.1	0.6	-1.1	0.6	1.4	0.03	1.2	0.4	-1.2	0.5	0.03
Q$104	Q9D3L3	Q9D3L3_MOUSE	Snap23	Synaptosomal-associated protein	0.9996	7.69	1	293765	84623	222987	210256	23914	13727	45504	16286	18.2	36.3	45.6	17.3	-3.5	0.0004	-1.3	0.4	-1.4	0.08	2.6	0.1	2.5	0.002	-1.1	0.8	0.0007
Q$484	E9PZS8	E9PZS8_MOUSE	Cox7a2l	Cytochrome c oxidase subunit 7A-related protein, mitochondrial	0.9998	33.58	2	291812	234321	303337	264545	11620	3864	26902	30811	8.9	3.7	19.8	26	-1.2	0.009	1	0.8	-1.1	0.8	1.3	0.3	1.1	0.8	-1.1	0.8	0.1
Q$775	O35226-2	PSMD4_MOUSE	Psmd	Isoform Rpn10B of 26S proteasome non-ATPase regulatory subunit 4	1	7.39	2	290918	244049	301510	274486	19147	9345	19177	25172	14.7	8.6	14.2	20.5	-1.2	0.3	1	0.9	-1.1	0.9	1.2	0.2	1.1	0.7	-1.1	0.8	0.2
Q$1340	Q3TDN2-2	FAF2_MOUSE	Faf	Isoform 2 of FAS-associated factor 2	0.9543	3.99	1	284081	186811	265563	322902	40347	33927	36565	25028	31.8	40.6	30.8	17.3	-1.5	0.4	-1.1	0.7	1.1	0.7	1.4	0.5	1.7	0.07	1.2	0.5	0.08
Q$584	F6VVY4	F6VVY4_MOUSE	Slc25a1	Protein Slc25a1 (Fragment)	1	6.09	1	280864	199318	289162	286325	30442	17784	22976	18930	24.2	20	17.8	14.8	-1.4	0.2	1	1	1	1	1.5	0.07	1.4	0.06	-1	1	0.04
Q$53	A2AM62	A2AM62_MOUSE	Hp1bp3	Heterochromatin protein 1-binding protein 3 (Fragment)	1	6.06	1	278908	110453	273057	231928	26902	14451	41364	20326	21.6	29.3	33.9	19.6	-2.5	0.003	-1	0.9	-1.2	0.5	2.5	0.02	2.1	0.006	-1.2	0.6	0.002
Q$2001	Q9ERN0	SCAM2_MOUSE	Scamp2	Secretory carrier-associated membrane protein 2	0.9373	3.65	1	276945	203059	247350	264694	11971	14299	18807	36288	9.7	15.7	17	30.7	-1.4	0.02	-1.1	0.5	-1	0.9	1.2	0.4	1.3	0.5	1.1	0.9	0.1
Q$12	A2A6J4	A2A6J4_MOUSE	Lsp1	Lymphocyte-specific protein 1	1	12.42	3	274904	180907	258097	233107	22045	8524	25355	9855	17.9	10.5	22	9.5	-1.5	0.02	-1.1	0.6	-1.2	0.3	1.4	0.08	1.3	0.02	-1.1	0.6	0.01
Q$766	O09048	O09048_MOUSE	Krtap6-1	Glycine tyrosine-rich hair keratin protein	0.9994	17.95	1	274101	126346	234143	184453	29900	13162	34873	38794	24.4	23.3	33.3	47	-2.2	0.01	-1.2	0.6	-1.5	0.4	1.9	0.1	1.5	0.5	-1.3	0.6	0.02
Q$798	Q80ZJ2	Q80ZJ2_MOUSE	Impa1	Impa1 protein	0.9994	3.99	1	274096	78233	278987	213013	27352	11176	33207	21956	22.3	31.9	26.6	23	-3.5	0.001	1	0.9	-1.3	0.3	3.6	0.002	2.7	0.002	-1.3	0.3	9e-05
Q$717	H3BLH2	H3BLH2_MOUSE	Sqrdl	Sulfide:quinone oxidoreductase, mitochondrial (Fragment)	1	7.25	1	273585	146633	201717	196001	47128	17637	23706	26910	38.5	26.9	26.3	30.7	-1.9	0.2	-1.4	0.5	-1.4	0.5	1.4	0.4	1.3	0.5	-1	0.9	0.07
Q$507	E9Q242	E9Q242_MOUSE	Adsl	Adenylosuccinate lyase	0.9119	4.69	1	272901	217971	349856	317915	36496	7185	25140	51446	29.9	7.4	16.1	36.2	-1.3	0.5	1.3	0.5	1.2	0.7	1.6	0.03	1.5	0.5	-1.1	0.7	0.07
Q$252	D3Z4A2	D3Z4A2_MOUSE	Hmox2	Heme oxygenase 2 (Fragment)	1	18.46	1	268776	245337	275484	252516	21993	4184	15645	23513	18.3	3.8	12.7	20.8	-1.1	0.9	1	1	-1.1	0.9	1.1	0.6	1	1	-1.1	0.9	0.6
Q$607	F6ZFB8	F6ZFB8_MOUSE	Tcirg1	Protein Tcirg1 (Fragment)	0.9999	17.58	1	267625	228265	270514	214396	14520	13840	26057	27517	12.1	13.6	21.5	28.7	-1.2	0.4	1	0.9	-1.2	0.5	1.2	0.5	-1.1	0.9	-1.3	0.5	0.2
Q$1173	P62077	TIM8B_MOUSE	Timm8b	Mitochondrial import inner membrane translocase subunit Tim8 B	0.9713	13.25	1	267095	184705	276535	233687	36496	19408	28123	32217	30.6	23.5	22.7	30.8	-1.4	0.3	1	0.8	-1.1	0.8	1.5	0.2	1.3	0.6	-1.2	0.7	0.2
Q$611	F6ZKZ3	F6ZKZ3_MOUSE	Sqrdl	Sulfide:quinone oxidoreductase, mitochondrial	1	4.67	1	264782	120416	275499	210792	23787	8127	34197	12959	20.1	15.1	27.8	13.7	-2.2	0.002	1	0.8	-1.3	0.2	2.3	0.04	1.8	0.002	-1.3	0.2	0.0005
Q$62	P15379-3	CD44_MOUSE	Cd4	Isoform 12 of CD44 antigen	1	4.34	2	257510	111091	219454	191255	21089	13990	29489	27400	18.3	28.2	30	32	-2.3	0.002	-1.2	0.5	-1.3	0.3	2	0.05	1.7	0.1	-1.1	0.5	0.004
Q$744	Q9Z1G4	VPP1_MOUSE	Atp6v0a1	V-type proton ATPase 116 kDa subunit a isoform 1	0.9545	1.55	1	254753	82107	160475	155491	38854	8715	14690	31831	34.1	23.7	20.5	45.8	-3.1	0.05	-1.6	0.2	-1.6	0.2	2	0.01	1.9	0.2	-1	0.9	0.003
Q$1356	Q3TW96-2	UAP1L_MOUSE	Uap1l	Isoform 2 of UDP-N-acetylhexosamine pyrophosphorylase-like protein 1	1	2.62	1	253164	305253	230536	245729	13750	17599	25066	12445	12.1	12.9	24.3	11.3	1.2	0.2	-1.1	0.8	-1	0.8	-1.3	0.2	-1.2	0.1	1.1	0.8	0.05
Q$1402	Q5SUF2-2	LC7L3_MOUSE	Luc7l	Isoform 2 of Luc7-like protein 3	0.9986	7.74	2	252868	169894	273800	256781	34327	19088	31749	19353	30.4	25.1	25.9	16.9	-1.5	0.2	1.1	1	1	1	1.6	0.1	1.5	0.07	-1.1	1	0.06
Q$1011	P28867-2	KPCD_MOUSE	Prkc	Isoform 2 of Protein kinase C delta type	0.9548	1.71	1	252317	149616	208040	178659	36614	7543	35531	30874	32.4	11.3	38.2	38.6	-1.7	0.3	-1.2	0.8	-1.4	0.6	1.4	0.6	1.2	0.8	-1.2	0.8	0.1
Q$1603	Q9QXE7	TBL1X_MOUSE	Tbl1x	F-box-like/WD repeat-containing protein TBL1X	0.9417	5.31	1	247495	168309	282336	221689	18430	29429	27939	19658	16.7	39.1	22.1	19.8	-1.5	0.2	1.1	0.5	-1.1	0.5	1.7	0.1	1.3	0.4	-1.3	0.4	0.03
Q$1991	Q9EP69	SAC1_MOUSE	Sacm1l	Phosphatidylinositide phosphatase SAC1	0.9954	1.7	1	247125	154598	250831	239784	43791	38889	25879	49579	39.6	56.2	23.1	46.2	-1.6	0.6	1	1	-1	1	1.6	0.4	1.6	0.6	-1	1	0.3
Q$970	P68404-2	KPCB_MOUSE	Prkc	Isoform Beta-II of Protein kinase C beta type	0.9745	1.78	1	244824	112878	219107	216475	32540	16488	25458	12418	29.7	32.7	26	12.8	-2.2	0.03	-1.1	0.8	-1.1	0.8	1.9	0.03	1.9	0.006	-1	0.9	0.005
Q$88	A2CF80	A2CF80_MOUSE	0610010K14Rik	Protein 0610010K14Rik	0.9619	27.45	1	243983	167751	280466	237677	25157	9384	27698	36204	23.1	12.5	22.1	34.1	-1.5	0.1	1.1	0.7	-1	0.9	1.7	0.03	1.4	0.4	-1.2	0.7	0.05
Q$45	A2AIW9	A2AIW9_MOUSE	Pmpca	Mitochondrial-processing peptidase subunit alpha	1	9.52	2	242473	258204	232975	260520	44294	62400	15020	33769	40.8	54	14.4	29	1.1	1	-1	1	1.1	1	-1.1	1	1	1	1.1	1	1
Q$550	E9QAX7	E9QAX7_MOUSE	Cse1l	Exportin-2	0.9554	3.61	1	241288	228899	247109	229788	5067	11911	10693	9053	4.7	11.6	9.7	8.8	-1.1	0.8	1	0.9	-1.1	0.8	1.1	0.8	1	1	-1.1	0.8	0.5
Q$295	D6RHS6	D6RHS6_MOUSE	Pebp1	Phosphatidylethanolamine-binding protein 1	1	9.56	1	240791	182965	230560	230636	8854	10959	10010	15714	8.2	13.4	9.7	15.2	-1.3	0.02	-1	0.8	-1	0.8	1.3	0.06	1.3	0.1	1	1	0.01
Q$1892	Q9CY97-2	SSU72_MOUSE	Ssu7	Isoform 2 of RNA polymerase II subunit A C-terminal domain phosphatase SSU72	0.9546	9.34	1	239419	119134	259384	220043	36477	21816	52481	30946	34.1	40.9	45.2	31.4	-2	0.1	1.1	0.9	-1.1	0.9	2.2	0.1	1.8	0.1	-1.2	0.9	0.07
Q$600	F6YFR7	F6YFR7_MOUSE	Cope	Coatomer subunit epsilon (Fragment)	0.9999	13.68	2	239112	194876	228043	220420	21649	12755	16227	10704	20.2	14.6	15.9	10.9	-1.2	0.5	-1	0.9	-1.1	0.8	1.2	0.5	1.1	0.5	-1	0.9	0.3
Q$1513	Q69ZN7-2	MYOF_MOUSE	Myo	Isoform 2 of Myoferlin	1	1.19	1	238848	67219	156075	179550	46668	6731	33726	30850	43.7	22.4	48.3	38.4	-3.6	0.1	-1.5	0.5	-1.3	0.5	2.3	0.2	2.7	0.1	1.2	0.6	0.02
Q$804	O70172	PI42A_MOUSE	Pip4k2a	Phosphatidylinositol 5-phosphate 4-kinase type-2 alpha	0.939	2.22	1	238459	176675	231934	195257	20543	36319	23174	22187	19.3	46	22.3	25.4	-1.3	0.7	-1	0.9	-1.2	0.7	1.3	0.7	1.1	0.9	-1.2	0.7	0.3
Q$2115	Q9Z329-3	ITPR2_MOUSE	Itpr	Isoform 3 of Inositol 1,4,5-trisphosphate receptor type 2	0.9379	1.65	1	235468	394999	851587	508851	32708	152739	428833	231363	31.1	86.5	112.6	101.7	1.7	0.8	3.6	0.8	2.2	0.8	2.2	0.8	1.3	0.8	-1.7	0.8	0.4
Q$441	P23506-2	PIMT_MOUSE	Pcmt	Isoform 2 of Protein-L-isoaspartate(D-aspartate) O-methyltransferase	0.9843	14.91	1	234755	130265	218180	256716	25157	27998	37707	46447	24	48.1	38.6	40.5	-1.8	0.1	-1.1	0.9	1.1	0.9	1.7	0.3	2	0.2	1.2	0.9	0.1
Q$851	P04202	TGFB1_MOUSE	Tgfb1	Transforming growth factor beta-1	1	5.13	1	234490	246170	279311	304993	20343	15686	20434	20263	19.4	14.2	16.4	14.9	1	0.7	1.2	0.5	1.3	0.2	1.1	0.6	1.2	0.2	1.1	0.6	0.08
Q$9	A2A6F8	A2A6F8_MOUSE	Rpl23	60S ribosomal protein L23 (Fragment)	1	33.33	1	231582	224358	282678	272310	26491	10921	6575	33265	25.6	10.9	5.2	27.3	-1	0.9	1.2	0.5	1.2	0.7	1.3	0.01	1.2	0.6	-1	0.9	0.2
Q$1899	Q9CZ44-2	NSF1C_MOUSE	Nsfl1	Isoform 2 of NSFL1 cofactor p47	0.9999	5.68	1	230345	209740	225780	224101	11304	7676	8013	8238	11	8.2	7.9	8.2	-1.1	0.7	-1	1	-1	1	1.1	0.7	1.1	0.7	-1	1	0.4
[truncated: 145 more rows]

## Sheet: ANOVA P<0.01
Entry Q#	Protein ID	Protein Entry	Gene Name	Protein Name	Protein Probability	Protein Coverage (%)	# of Identified Peptides	mean 1wk Control	mean 1wk 0.1Gy	mean 1wk 0.25Gy	mean 1wk 0.5Gy	SEM 1wk Control	SEM 1wk 0.1Gy	SEM 1wk 0.25Gy	SEM 1wk 0.5Gy	CV(%) 1wk Control	CV(%) 1wk 0.1Gy	CV(%) 1wk 0.25Gy	CV(%) 1wk 0.5Gy	FC 1wk 0.1Gy 1wk Control	Multiple Comparison p 1wk 0.1Gy 1wk Control	FC 1wk 0.25Gy 1wk Control	Multiple Comparison p 1wk 0.25Gy 1wk Control	FC 1wk 0.5Gy 1wk Control	Multiple Comparison p 1wk 0.5Gy 1wk Control	FC 1wk 0.25Gy 1wk 0.1Gy	Multiple Comparison p 1wk 0.25Gy 1wk 0.1Gy	FC 1wk 0.5Gy 1wk 0.1Gy	Multiple Comparison p 1wk 0.5Gy 1wk 0.1Gy	FC 1wk 0.5Gy 1wk 0.25Gy	Multiple Comparison p 1wk 0.5Gy 1wk 0.25Gy	ANOVA_p_value
[truncated: 1,106 more rows]

[truncated: 3 more sheets: 0.1 Gy, 0.25 Gy, 0.5 Gy]
