# Supplementary material for: Proteomic Profiling of Hematopoietic Stem/Progenitor Cells after a Whole Body Exposure of CBA/CaJ Mice to Titanium (48Ti) Ions
Source: Proteomes. 2015 Jul 21;3(3):132–58. doi: 10.3390/proteomes3030132 (PMC5217378; doi:10.3390/proteomes3030132)
Supplement: Supplementary File 2 [file proteomes-03-00132-s002.xlsx]

## Sheet: Quantification_All_Proteins_Bri
Entry Q#	Protein ID	Protein Entry	Gene Name	Protein Name	Protein Probability	Protein Coverage (%)	# of Identified Peptides	mean Control	mean 6mo 0.1Gy	mean 6mo 0.25Gy	mean 6mo 0.5Gy	SEM Control	SEM 6mo 0.1Gy	SEM 6mo 0.25Gy	SEM 6mo 0.5Gy	CV(%) Control	CV(%) 6mo 0.1Gy	CV(%) 6mo 0.25Gy	CV(%) 6mo 0.5Gy	FC 6mo 0.1Gy Control	Multiple_Comparison_p 6mo 0.1Gy Control	FC 6mo 0.25Gy Control	Multiple_Comparison_p 6mo 0.25Gy Control	FC 6mo 0.5Gy Control	Multiple_Comparison_p 6mo 0.5Gy Control	FC 6mo 0.25Gy 6mo 0.1Gy	Multiple_Comparison_p 6mo 0.25Gy 6mo 0.1Gy	FC 6mo 0.5Gy 6mo 0.1Gy	Multiple_Comparison_p 6mo 0.5Gy 6mo 0.1Gy	FC 6mo 0.5Gy 6mo 0.25Gy	Multiple_Comparison_p 6mo 0.5Gy 6mo 0.25Gy	ANOVA_p_value
Q$1019	P29758	OAT_MOUSE	Oat	Ornithine aminotransferase, mitochondrial	1	61.28	21	1673635203	1477469954	1453704850	1591118456	102235580	45036866	66721142	40217470	13.7	6.8	10.3	5.7	-1.1	0.5	-1.2	0.5	-1.1	0.7	-1	0.8	1.1	0.5	1.1	0.5	0.1
Q$882	P09103	PDIA1_MOUSE	P4hb	Protein disulfide-isomerase	1	71.91	48	1093573274	957743899	1039569283	1083529193	97440451	42384778	29021142	66774780	19.9	9.9	6.2	13.8	-1.1	0.7	-1.1	0.9	-1	0.9	1.1	0.6	1.1	0.6	1	0.9	0.5
Q$1029	P32020	NLTP_MOUSE	Scp2	Non-specific lipid-transfer protein	1	18.28	11	1085729961	950884348	1017214172	1178564514	102216261	59073162	42578433	49842443	21.1	13.9	9.4	9.5	-1.1	0.7	-1.1	0.8	1.1	0.8	1.1	0.8	1.2	0.1	1.2	0.2	0.1
Q$1030	P32020-2	NLTP_MOUSE	Scp	Isoform SCP2 of Non-specific lipid-transfer protein	1	55.94	10	1078488071	942797798	1008961892	1168168104	102548421	60028653	42660328	49961097	21.3	14.2	9.5	9.6	-1.1	0.7	-1.1	0.8	1.1	0.8	1.1	0.8	1.2	0.1	1.2	0.2	0.2
Q$1829	Q9CPQ1	COX6C_MOUSE	Cox6c	Cytochrome c oxidase subunit 6C	1	28.95	3	926309690	734050580	862187840	1045693430	170978500	108583380	83441687	126232817	41.3	33.1	21.6	27	-1.3	0.8	-1.1	0.8	1.1	0.8	1.2	0.8	1.4	0.5	1.2	0.8	0.4
Q$518	P54310-2	LIPS_MOUSE	Lip	Isoform 2 of Hormone-sensitive lipase	0.9976	1.37	2	881164633	791904700	772314500	845141633	52212488	16624357	33067372	30322447	13.2	4.7	9.6	8	-1.1	0.5	-1.1	0.5	-1	0.8	-1	0.8	1.1	0.5	1.1	0.5	0.2
Q$1218	P62962	PROF1_MOUSE	Pfn1	Profilin-1	1	77.86	16	836598206	711018304	842116774	986701232	125746907	94720103	83466836	72014485	33.6	29.8	22.2	16.3	-1.2	0.8	1	1	1.2	0.8	1.2	0.8	1.4	0.3	1.2	0.7	0.3
Q$1116	P51881	ADT2_MOUSE	Slc25a5	ADP/ATP translocase 2	1	65.1	24	643629673	571090786	584130190	639526696	45399609	15265529	27407054	23515479	15.8	6	10.5	8.2	-1.1	0.6	-1.1	0.6	-1	0.9	1	0.9	1.1	0.2	1.1	0.6	0.2
Q$1714	Q9CQ43	Q9CQ43_MOUSE	Dut	Deoxyuridine triphosphatase	1	52.47	6	595449869	552285131	512072910	551850431	30050548	19046394	18811148	19146024	11.3	7.7	8.2	7.8	-1.1	0.6	-1.2	0.2	-1.1	0.6	-1.1	0.6	-1	1	1.1	0.6	0.1
Q$1548	Q6ZWN5	RS9_MOUSE	Rps9	40S ribosomal protein S9	1	26.29	8	577962577	528343243	535026024	583854618	43435982	34937806	19995298	27622559	16.8	14.8	8.4	10.6	-1.1	0.9	-1.1	0.9	1	1	1	1	1.1	0.8	1.1	0.7	0.5
Q$1047	P35700	PRDX1_MOUSE	Prdx1	Peroxiredoxin-1	1	90.95	33	568949009	457450981	602046147	705981120	75483458	34308241	34785864	40772211	29.7	16.8	12.9	12.9	-1.2	0.4	1.1	0.7	1.2	0.4	1.3	0.09	1.5	0.01	1.2	0.3	0.02
Q$1200	P62806	H4_MOUSE	Hist1h4a	Histone H4	1	62.14	18	555607293	585173389	487852628	977853313	96068292	79089801	65041488	430953731	38.7	30.2	29.8	98.5	1.1	0.9	-1.1	0.9	1.8	0.9	-1.2	0.9	1.7	0.9	2	0.9	0.4
Q$1243	P68033	ACTC_MOUSE	Actc1	Actin, alpha cardiac muscle 1	1	50.93	28	532177823	382043041	587488209	810816750	100083734	47725848	54334210	58200140	42.1	27.9	20.7	16.1	-1.4	0.4	1.1	0.6	1.5	0.1	1.5	0.1	2.1	0.003	1.4	0.1	0.004
Q$969	P20152	VIME_MOUSE	Vim	Vimentin	1	77.9	67	513367351	412972749	704332732	827084449	106762377	49250225	55329446	63009443	46.5	26.7	17.6	17	-1.2	0.4	1.4	0.4	1.6	0.1	1.7	0.02	2	0.005	1.2	0.4	0.004
Q$901	P11247	PERM_MOUSE	Mpo	Myeloperoxidase	1	55.43	47	501923009	463266493	434998009	475847861	37231638	29230900	44684386	25186344	16.6	14.1	23	11.8	-1.1	0.9	-1.2	0.9	-1.1	0.9	-1.1	0.9	1	0.9	1.1	0.9	0.6
Q$841	P02089	HBB2_MOUSE	Hbb-b2	Hemoglobin subunit beta-2	1	62.59	10	490596163	442795598	456151904	493328618	15757119	11831550	17152293	7090331	7.2	6	8.4	3.2	-1.1	0.2	-1.1	0.4	1	0.9	1	0.8	1.1	0.04	1.1	0.3	0.04
Q$840	P02088	HBB1_MOUSE	Hbb-b1	Hemoglobin subunit beta-1	1	53.74	8	470180826	428248730	435080411	458000555	11613881	11232170	16870866	2100519	5.5	5.9	8.7	1	-1.1	0.2	-1.1	0.4	-1	0.6	1	0.7	1.1	0.3	1.1	0.6	0.07
Q$1246	P68134	ACTS_MOUSE	Acta1	Actin, alpha skeletal muscle	1	47.21	23	463146915	335140397	518186529	718174847	87726963	44109227	49108403	52903927	42.4	29.4	21.2	16.5	-1.4	0.4	1.1	0.6	1.6	0.1	1.5	0.1	2.1	0.003	1.4	0.1	0.004
Q$889	P10126	EF1A1_MOUSE	Eef1a1	Elongation factor 1-alpha 1	1	59.31	42	457625302	359181477	493694990	629584852	78806425	40006911	37811517	49453210	38.5	24.9	17.1	17.6	-1.3	0.5	1.1	0.7	1.4	0.3	1.4	0.2	1.8	0.02	1.3	0.2	0.02
Q$1226	P63038	CH60_MOUSE	Hspd1	60 kDa heat shock protein, mitochondrial	1	80.28	65	443047488	378352367	456046485	546575809	35922861	41142013	47865549	73496694	18.1	24.3	23.5	30.1	-1.2	0.7	1	0.8	1.2	0.7	1.2	0.7	1.4	0.4	1.2	0.7	0.2
Q$965	P20029	GRP78_MOUSE	Hspa5	78 kDa glucose-regulated protein	1	58.02	49	429956346	344050928	446127654	451912334	41560213	26279750	27756712	24756312	21.6	17.1	13.9	12.2	-1.2	0.4	1	1	1.1	1	1.3	0.1	1.3	0.1	1	1	0.08
Q$951	P17742	PPIA_MOUSE	Ppia	Peptidyl-prolyl cis-trans isomerase A	1	71.34	17	427335613	266872680	493499391	619608909	64721331	29963519	30537897	41973901	33.9	25.1	13.8	15.1	-1.6	0.1	1.2	0.4	1.4	0.1	1.8	0.004	2.3	0.0008	1.3	0.1	0.0003
Q$1026	P31725	S10A9_MOUSE	S100a9	Protein S100-A9	1	68.14	18	421068276	201601088	434415256	473100463	51287991	13927699	24699593	41233494	27.2	15.4	12.7	19.5	-2.1	0.04	1	0.8	1.1	0.8	2.2	0.0002	2.3	0.001	1.1	0.8	0.0003
Q$875	P08249	MDHM_MOUSE	Mdh2	Malate dehydrogenase, mitochondrial	1	78.4	29	401653571	346191699	403763515	429802280	30588256	20135432	26284522	30812493	17	13	14.6	16	-1.2	0.5	1	1	1.1	0.9	1.2	0.5	1.2	0.3	1.1	0.9	0.2
Q$1588	Q8BFZ3	ACTBL_MOUSE	Actbl2	Beta-actin-like protein 2	1	26.06	6	384984565	272025782	452089079	586683452	64987937	27746123	26470444	46753971	37.7	22.8	13.1	17.8	-1.4	0.3	1.2	0.4	1.5	0.1	1.7	0.008	2.2	0.002	1.3	0.1	0.001
Q$1222	P63017	HSP7C_MOUSE	Hspa8	Heat shock cognate 71 kDa protein	1	70.12	50	369742181	272489495	416860806	521888674	55605528	23103649	29354149	34333577	33.6	19	15.7	14.7	-1.4	0.3	1.1	0.5	1.4	0.2	1.5	0.02	1.9	0.002	1.3	0.2	0.002
Q$1319	Q03265	ATPA_MOUSE	Atp5a1	ATP synthase subunit alpha, mitochondrial	1	65.28	46	357568026	322344377	378564284	400684914	25493745	30798811	28122548	27742286	15.9	21.4	16.6	15.5	-1.1	0.8	1.1	0.8	1.1	0.7	1.2	0.7	1.2	0.5	1.1	0.8	0.3
Q$2113	Q9Z2X1-2	HNRPF_MOUSE	Hnrnp	Isoform 2 of Heterogeneous nuclear ribonucleoprotein F	1	33.16	9	324079803	301260134	260341242	279068038	19756531	9927233	10160806	5207776	13.6	7.4	8.7	4.2	-1.1	0.3	-1.2	0.1	-1.2	0.3	-1.2	0.1	-1.1	0.3	1.1	0.3	0.01
Q$1663	Q8CGP4	Q8CGP4_MOUSE	Hist1h2aa	Histone H2A	1	31.01	2	310021069	316755764	262137014	474671272	51076450	44293897	38565230	169100766	36.8	31.3	32.9	79.7	1	0.9	-1.2	0.9	1.5	0.9	-1.2	0.9	1.5	0.9	1.8	0.9	0.4
Q$991	P26039	TLN1_MOUSE	Tln1	Talin-1	1	51.36	86	305069851	261966992	310084575	355545974	26410541	10489502	7869553	15157695	19.4	9	5.7	9.5	-1.2	0.4	1	0.9	1.2	0.4	1.2	0.03	1.4	0.006	1.1	0.1	0.01
Q$942	P17182	ENOA_MOUSE	Eno1	Alpha-enolase	1	75.58	38	303178569	174038439	355648827	456249234	55562624	19409887	26962526	35652194	41	24.9	17	17.5	-1.7	0.2	1.2	0.4	1.5	0.2	2	0.003	2.6	0.0007	1.3	0.2	0.0006
Q$1715	Q8VDD5	MYH9_MOUSE	Myh9	Myosin-9	1	44.54	99	287443704	225947133	288695674	455798086	49145283	31125733	36985425	51221175	38.2	30.8	28.6	25.1	-1.3	0.5	1	1	1.6	0.2	1.3	0.5	2	0.03	1.6	0.1	0.01
Q$1139	P56480	ATPB_MOUSE	Atp5b	ATP synthase subunit beta, mitochondrial	1	72.21	39	278088808	251801615	281431620	291955128	20279904	24098858	19370473	21591010	16.3	21.4	15.4	16.5	-1.1	0.9	1	1	1	1	1.1	0.9	1.2	0.8	1	1	0.6
Q$1118	P52480	KPYM_MOUSE	Pkm	Pyruvate kinase PKM	1	74.95	50	276707843	181076807	294990145	388980418	51623834	25027979	24574045	34385243	41.7	30.9	18.6	19.8	-1.5	0.3	1.1	0.8	1.4	0.3	1.6	0.06	2.1	0.007	1.3	0.2	0.007
Q$1763	Q922D8	C1TC_MOUSE	Mthfd1	C-1-tetrahydrofolate synthase, cytoplasmic	1	34.01	20	255353974	231872203	241893975	263390807	34032310	22089357	8804026	24299965	29.8	21.3	8.1	20.6	-1.1	1	-1.1	1	1	1	1	1	1.1	0.9	1.1	0.9	0.8
Q$940	P16858	G3P_MOUSE	Gapdh	Glyceraldehyde-3-phosphate dehydrogenase	1	78.98	32	251898022	175612258	276070895	360249258	44145077	17799852	19131286	25291843	39.2	22.7	15.5	15.7	-1.4	0.3	1.1	0.6	1.4	0.2	1.6	0.02	2.1	0.002	1.3	0.1	0.003
Q$922	P14211	CALR_MOUSE	Calr	Calreticulin	1	73.32	33	240391230	186934137	251246731	258879632	33732789	17724483	23469539	18436571	31.4	21.2	20.9	15.9	-1.3	0.6	1	1	1.1	1	1.3	0.3	1.4	0.1	1	1	0.2
Q$572	F6SVV1	F6SVV1_MOUSE	Gm9493	Protein Gm9493	1	28.65	8	222166077	201592401	183695085	200124700	12668059	9419447	13524948	9804390	12.8	10.4	16.5	11	-1.1	0.7	-1.2	0.4	-1.1	0.7	-1.1	0.7	-1	0.9	1.1	0.7	0.2
Q$915	P13020-2	GELS_MOUSE	Gs	Isoform 2 of Gelsolin	1	56.63	27	216497971	197899984	214827085	210123026	13230350	14375135	20229220	10497838	13.7	16.2	21.1	11.2	-1.1	0.9	-1	1	-1	1	1.1	1	1.1	1	-1	1	0.8
Q$727	J3QJZ3	J3QJZ3_MOUSE	Gm6472	MCG116065	1	24.23	7	214616447	196569821	174937435	188373950	11502497	8890879	13005594	10084157	12	10.1	16.6	12	-1.1	0.6	-1.2	0.3	-1.1	0.5	-1.1	0.6	-1	0.7	1.1	0.7	0.1
Q$2118	S4R1W1	S4R1W1_MOUSE		Uncharacterized protein	1	73.87	24	198516494	137578367	217625869	284120841	32391445	12969050	11917889	20436586	36.5	21.1	12.2	16.1	-1.4	0.2	1.1	0.6	1.4	0.2	1.6	0.009	2.1	0.002	1.3	0.09	0.002
Q$1142	P57780	ACTN4_MOUSE	Actn4	Alpha-actinin-4	1	32.79	20	194737200	165947112	183645836	210387314	18667557	11217827	6703688	8966949	21.4	15.1	8.2	9.5	-1.2	0.6	-1.1	0.7	1.1	0.7	1.1	0.6	1.3	0.09	1.1	0.2	0.1
Q$1570	Q80UM7	MOGS_MOUSE	Mogs	Mannosyl-oligosaccharide glucosidase	1	11.03	5	187889508	185121448	159213423	270882435	28934035	23956357	21141246	84939774	34.4	28.9	29.7	70.1	-1	0.9	-1.2	0.9	1.4	0.9	-1.2	0.9	1.5	0.9	1.7	0.8	0.4
Q$1007	P27773	PDIA3_MOUSE	Pdia3	Protein disulfide-isomerase A3	1	60.59	38	184517696	141441281	197144154	201182760	26525757	15232495	16944816	14390859	32.1	24.1	19.2	16	-1.3	0.6	1.1	0.9	1.1	0.9	1.4	0.2	1.4	0.1	1	0.9	0.1
Q$871	P08113	ENPL_MOUSE	Hsp90b1	Endoplasmin	1	58.48	54	180051271	148684578	182991468	198757411	22476272	12998870	14662374	15822143	27.9	19.5	17.9	17.8	-1.2	0.7	1	0.9	1.1	0.9	1.2	0.5	1.3	0.2	1.1	0.9	0.2
Q$1145	P58252	EF2_MOUSE	Eef2	Elongation factor 2	1	56.41	57	175414885	122366612	190612084	257474224	28760773	12866714	15007332	17096541	36.7	23.5	17.6	14.8	-1.4	0.2	1.1	0.7	1.5	0.1	1.6	0.04	2.1	0.001	1.4	0.07	0.002
Q$2085	Q9WVA4	TAGL2_MOUSE	Tagln2	Transgelin-2	1	87.44	22	175268129	147240821	178253808	212684261	17835736	7720005	9241445	13508734	22.8	11.7	11.6	14.2	-1.2	0.3	1	0.9	1.2	0.3	1.2	0.2	1.4	0.02	1.2	0.2	0.02
Q$909	P11983	TCPA_MOUSE	Tcp1	T-complex protein 1 subunit alpha	1	45.86	16	174965934	151970230	162917134	190778888	13200161	8023825	5125113	13691797	16.9	11.8	7	16	-1.2	0.5	-1.1	0.7	1.1	0.7	1.1	0.6	1.3	0.2	1.2	0.4	0.1
Q$1503	Q64433	CH10_MOUSE	Hspe1	10 kDa heat shock protein, mitochondrial	1	70.59	11	164083680	137503617	171217531	179406258	14160380	10372833	15025945	16054454	19.3	16.9	19.6	20	-1.2	0.5	1	0.9	1.1	0.9	1.2	0.4	1.3	0.3	1	0.9	0.2
Q$1095	P49290	PERE_MOUSE	Epx	Eosinophil peroxidase	1	51.26	40	160998202	161061136	155222950	227599612	16626878	19046755	18320922	46030110	23.1	26.4	26.4	45.2	1	1	-1	1	1.4	0.7	-1	1	1.4	0.7	1.5	0.7	0.2
Q$905	P11499	HS90B_MOUSE	Hsp90ab1	Heat shock protein HSP 90-beta	1	54.01	47	160417732	114091935	175077751	244010701	29391201	12688792	16511676	17610044	41	24.9	21.1	16.1	-1.4	0.3	1.1	0.7	1.5	0.1	1.5	0.09	2.1	0.002	1.4	0.09	0.003
Q$505	Q99MH7	Q99MH7_MOUSE	Krt75	Cytokeratin KRT2-6HF	1	4.28	2	156599467	150950367	117462367	124790633	7645284	6172977	5642222	3745286	10.9	9.1	10.7	6.7	-1	0.6	-1.3	0.02	-1.3	0.02	-1.3	0.02	-1.2	0.02	1.1	0.5	0.0005
Q$888	P10107	ANXA1_MOUSE	Anxa1	Annexin A1	1	71.68	28	156386915	137323212	173642569	181110069	18958409	7747171	11927685	15316105	27.1	12.6	15.4	18.9	-1.1	0.8	1.1	0.8	1.2	0.8	1.3	0.2	1.3	0.2	1	0.8	0.2
Q$1903	Q9CZU6	CISY_MOUSE	Cs	Citrate synthase, mitochondrial	1	54.74	25	156199793	143917477	162140800	169245124	11946350	7741483	10834094	10484032	17.1	12	14.9	13.9	-1.1	0.9	1	0.9	1.1	0.9	1.1	0.7	1.2	0.4	1	0.9	0.4
Q$1566	Q7TPV4	MBB1A_MOUSE	Mybbp1a	Myb-binding protein 1A	1	23.74	20	152390033	135487157	139312719	164246674	11066526	2946240	2047102	5122197	16.2	4.9	3.3	7	-1.1	0.6	-1.1	0.7	1.1	0.7	1	0.7	1.2	0.007	1.2	0.01	0.02
Q$1447	Q61233	PLSL_MOUSE	Lcp1	Plastin-2	1	63.48	45	149373644	97770556	170770463	202543789	25652768	10600489	12497609	14295953	38.4	24.2	16.4	15.8	-1.5	0.3	1.1	0.5	1.4	0.3	1.7	0.01	2.1	0.002	1.2	0.3	0.004
Q$1969	Q9DBJ1	PGAM1_MOUSE	Pgam1	Phosphoglycerate mutase 1	1	76.77	25	144865106	96866533	149021448	188063289	27115683	10739468	10771586	12724083	41.9	24.8	16.2	15.1	-1.5	0.4	1	0.9	1.3	0.4	1.5	0.04	1.9	0.004	1.3	0.2	0.01
Q$884	P09411	PGK1_MOUSE	Pgk1	Phosphoglycerate kinase 1	1	80.34	32	144815551	87507595	162676716	248512415	27992442	12689949	14863380	40130400	43.2	32.4	20.4	36.1	-1.7	0.2	1.1	0.6	1.7	0.2	1.9	0.03	2.8	0.06	1.5	0.2	0.005
Q$1081	P47738	ALDH2_MOUSE	Aldh2	Aldehyde dehydrogenase, mitochondrial	1	76.3	35	142984424	130554239	147344519	198105760	16013914	12738744	14023757	39310988	25	21.8	21.3	44.4	-1.1	0.8	1	0.8	1.4	0.7	1.1	0.8	1.5	0.6	1.3	0.7	0.2
Q$957	P18242	CATD_MOUSE	Ctsd	Cathepsin D	1	51.71	20	136212781	112307174	142699191	161997200	15694815	7574574	6270735	7457099	25.8	15.1	9.8	10.3	-1.2	0.4	1	0.7	1.2	0.4	1.3	0.07	1.4	0.01	1.1	0.3	0.02
Q$1046	P35564	CALX_MOUSE	Canx	Calnexin	1	40.27	21	135192550	114515027	138598571	150826101	6210464	1591254	4347622	11764259	10.3	3.1	7	17.4	-1.2	0.1	1	0.7	1.1	0.6	1.2	0.005	1.3	0.1	1.1	0.6	0.02
Q$1031	P32037	GTR3_MOUSE	Slc2a3	Solute carrier family 2, facilitated glucose transporter member 3	1	9.13	5	133895287	120818638	105747149	239857640	27842686	19623037	19729493	72642894	46.5	36.3	41.7	67.7	-1.1	0.8	-1.3	0.8	1.8	0.6	-1.1	0.8	2	0.6	2.3	0.6	0.1
Q$855	P05064	ALDOA_MOUSE	Aldoa	Fructose-bisphosphate aldolase A	1	87.09	43	130669265	78261344	156865987	190432705	27480300	11321777	14014926	14950092	47	32.3	20	17.6	-1.7	0.3	1.2	0.4	1.5	0.3	2	0.01	2.4	0.002	1.2	0.3	0.003
Q$1067	P43274	H14_MOUSE	Hist1h1e	Histone H1.4	1	22.37	12	128776883	134149296	120308042	110632945	9907532	15032874	21560373	19203822	17.2	25.1	40.1	38.8	1	1	-1.1	1	-1.2	0.9	-1.1	1	-1.2	0.9	-1.1	1	0.8
Q$1313	Q01853	TERA_MOUSE	Vcp	Transitional endoplasmic reticulum ATPase	1	59.93	40	127687621	95638837	143835060	173436301	15837114	8388555	8826082	10646992	27.7	19.6	13.7	13.7	-1.3	0.2	1.1	0.4	1.4	0.2	1.5	0.02	1.8	0.003	1.2	0.2	0.002
Q$597	F6Y6L6	F6Y6L6_MOUSE	Ctsd	Cathepsin D (Fragment)	1	57.91	17	126505494	104683441	131482538	149196967	14255670	6823524	5189641	6587535	25.2	14.6	8.8	9.9	-1.2	0.5	1	0.8	1.2	0.5	1.3	0.07	1.4	0.009	1.1	0.2	0.02
Q$1070	P43277	H13_MOUSE	Hist1h1d	Histone H1.3	1	22.62	13	125636012	127158125	118128687	123101674	10874909	13995446	18779826	12032588	19.4	24.6	35.5	21.9	1	1	-1.1	1	-1	1	-1.1	1	-1	1	1	1	1
Q$1304	P99024	TBB5_MOUSE	Tubb5	Tubulin beta-5 chain	1	56.53	25	116845885	78459702	133712814	179176071	15978325	7163091	4765151	9489173	30.6	20.4	8	11.8	-1.5	0.1	1.1	0.4	1.5	0.03	1.7	0.001	2.3	0.0002	1.3	0.01	4e-05
Q$98	A6ZI44	A6ZI44_MOUSE	Aldoa	Fructose-bisphosphate aldolase	1	68.42	32	113522378	68223480	137442339	164620014	22879627	9348299	11122042	12879266	45.1	30.6	18.1	17.5	-1.7	0.3	1.2	0.4	1.5	0.3	2	0.007	2.4	0.002	1.2	0.3	0.002
Q$863	P07356	ANXA2_MOUSE	Anxa2	Annexin A2	1	68.14	31	112838449	95683177	124491490	124794578	12920939	6087261	7553403	11278303	25.6	14.2	13.6	20.2	-1.2	0.7	1.1	0.8	1.1	0.8	1.3	0.1	1.3	0.2	1	1	0.2
Q$1056	P38647	GRP75_MOUSE	Hspa9	Stress-70 protein, mitochondrial	1	54.93	35	110552662	96823277	115011151	124940692	10634968	9777496	10852194	9614957	21.5	22.6	21.1	17.2	-1.1	0.8	1	0.8	1.1	0.8	1.2	0.8	1.3	0.4	1.1	0.8	0.3
Q$477	Q8BFQ1	Q8BFQ1_MOUSE	Psap	Prosaposin, isoform CRA_a	1	39.89	18	108914211	82034085	123847087	132060221	27108931	7206313	6972980	6066835	55.7	19.6	12.6	10.3	-1.3	0.9	1.1	0.9	1.2	0.9	1.5	0.02	1.6	0.004	1.1	0.9	0.1
Q$867	P07901	HS90A_MOUSE	Hsp90aa1	Heat shock protein HSP 90-alpha	1	56.62	46	108033714	78623382	122854744	166270024	20813580	9952986	8704177	10135399	43.1	28.3	15.8	13.6	-1.4	0.4	1.1	0.5	1.5	0.1	1.6	0.05	2.1	0.002	1.4	0.05	0.002
Q$883	P09405	NUCL_MOUSE	Ncl	Nucleolin	1	35.5	31	106997440	88859071	120706572	195991517	12159199	8575290	8021429	37389181	25.4	21.6	14.9	42.7	-1.2	0.4	1.1	0.4	1.8	0.2	1.4	0.1	2.2	0.2	1.6	0.3	0.01
Q$1044	P35486	ODPA_MOUSE	Pdha1	Pyruvate dehydrogenase E1 component subunit alpha, somatic form, mitochondrial	1	36.92	8	106974027	97605396	97644359	110355894	3303543	3343846	2497159	4680342	6.9	7.7	5.7	9.5	-1.1	0.2	-1.1	0.2	1	0.8	1	1	1.1	0.2	1.1	0.2	0.04
Q$958	P18760	COF1_MOUSE	Cfl1	Cofilin-1	1	70.48	18	102933170	72623908	129261476	183503525	20850189	9346151	9364247	17221995	45.3	28.8	16.2	21	-1.4	0.4	1.3	0.4	1.8	0.07	1.8	0.01	2.5	0.003	1.4	0.07	0.0007
Q$982	P24270	CATA_MOUSE	Cat	Catalase	1	53.89	25	101697097	94595479	89329954	99925178	9222877	6176727	5162873	6007359	20.3	14.6	12.9	13.4	-1.1	1	-1.1	0.8	-1	1	-1.1	1	1.1	1	1.1	0.8	0.6
Q$1327	Q06185	ATP5I_MOUSE	Atp5i	ATP synthase subunit e, mitochondrial	1	43.66	4	98115581	89168781	95125189	104563647	8602847	3738019	2164701	11920160	19.6	9.4	5.1	25.5	-1.1	0.8	-1	0.9	1.1	0.9	1.1	0.7	1.2	0.8	1.1	0.9	0.6
Q$2067	Q9WTP6-2	KAD2_MOUSE	Ak	Isoform 2 of Adenylate kinase 2, mitochondrial	1	72.41	15	98039434	92503323	84212684	91290595	7873801	5884863	2689962	5926234	18	14.2	7.1	14.5	-1.1	0.9	-1.2	0.6	-1.1	0.9	-1.1	0.7	-1	0.9	1.1	0.8	0.4
Q$839	P01942	HBA_MOUSE	Hba	Hemoglobin subunit alpha	1	83.8	16	94317624	64530914	112477755	148418779	18680626	8863428	14016627	12748331	44.3	30.7	27.9	19.2	-1.5	0.3	1.2	0.5	1.6	0.2	1.7	0.1	2.3	0.004	1.3	0.3	0.005
Q$1901	Q9CZN7	Q9CZN7_MOUSE	Shmt2	Serine hydroxymethyltransferase	1	67.06	31	93337038	73860387	101576057	111958473	10555784	8501934	9764127	10929987	25.3	25.7	21.5	21.8	-1.3	0.6	1.1	0.7	1.2	0.6	1.4	0.3	1.5	0.1	1.1	0.7	0.09
Q$693	G5E8N5	G5E8N5_MOUSE	Ldha	L-lactate dehydrogenase	1	71.19	24	93202626	63147538	104386192	138611923	16207499	7521001	8654944	11250354	38.9	26.6	18.5	18.1	-1.5	0.2	1.1	0.6	1.5	0.2	1.7	0.03	2.2	0.003	1.3	0.2	0.002
Q$1069	P43276	H15_MOUSE	Hist1h1b	Histone H1.5	1	24.22	10	91593630	88353014	79390660	112749034	9013461	9170225	9836882	21168530	22	23.2	27.7	42	-1	0.9	-1.2	0.9	1.2	0.9	-1.1	0.9	1.3	0.9	1.4	0.7	0.4
Q$850	P04187	GRAB_MOUSE	Gzmb	Granzyme B(G,H)	1	46.56	16	91529305	81828097	92012472	95980972	3540005	2481039	9328622	8671787	8.6	6.8	22.7	20.2	-1.1	0.3	1	1	1	1	1.1	0.8	1.2	0.6	1	1	0.5
Q$935	Q8C253	Q8C253_MOUSE	Lgals3	Galectin	1	49.62	17	91105401	73074732	132243361	147688056	20403646	8145237	6694674	13018847	50.1	24.9	11.3	19.7	-1.2	0.5	1.5	0.3	1.6	0.2	1.8	0.003	2	0.006	1.1	0.5	0.003
Q$1504	Q64444	CAH4_MOUSE	Ca4	Carbonic anhydrase 4	0.9996	11.8	3	90615650	77998220	85421090	99574330	4284452	3196675	1548903	6570880	10.6	9.2	4.1	14.8	-1.2	0.2	-1.1	0.5	1.1	0.5	1.1	0.3	1.3	0.1	1.2	0.3	0.02
Q$1673	Q8JZR0	ACSL5_MOUSE	Acsl5	Long-chain-fatty-acid--CoA ligase 5	1	6.73	4	90574297	65480461	95566066	128928422	18178897	6422200	6903611	10565920	44.9	21.9	16.2	18.3	-1.4	0.4	1.1	0.8	1.4	0.3	1.5	0.06	2	0.005	1.3	0.1	0.01
Q$1792	Q99KI0	ACON_MOUSE	Aco2	Aconitate hydratase, mitochondrial	1	43.97	28	90027130	78769021	115309115	117238801	7608175	5922582	21355578	17054906	18.9	16.8	41.4	32.5	-1.1	0.6	1.3	0.6	1.3	0.6	1.5	0.6	1.5	0.3	1	0.9	0.2
Q$1733	Q91VB8	Q91VB8_MOUSE	Hba	Hemoglobin alpha 1	1	83.8	16	87929396	59061931	106216334	137802334	17370569	8177866	12456235	11985081	44.2	31	26.2	19.4	-1.5	0.3	1.2	0.4	1.6	0.2	1.8	0.06	2.3	0.004	1.3	0.3	0.004
Q$1248	P68372	TBB4B_MOUSE	Tubb4b	Tubulin beta-4B chain	1	56.4	23	87747853	62996499	95938199	130992071	13169095	5656150	4672054	7893563	33.6	20.1	10.9	13.5	-1.4	0.2	1.1	0.6	1.5	0.07	1.5	0.01	2.1	0.0007	1.4	0.02	0.0004
Q$1483	Q62351	TFR1_MOUSE	Tfrc	Transferrin receptor protein 1	1	31.06	17	86763965	77626376	76612568	93507379	3226400	6991915	7323984	7931043	8.3	20.1	21.4	19	-1.1	0.7	-1.1	0.7	1.1	0.7	-1	0.9	1.2	0.6	1.2	0.6	0.3
Q$1963	Q9DB20	ATPO_MOUSE	Atp5o	ATP synthase subunit O, mitochondrial	1	54.46	11	84808206	71071821	91633583	111697937	7072500	7931253	7198565	12198988	18.6	25	17.6	24.4	-1.2	0.5	1.1	0.5	1.3	0.4	1.3	0.4	1.6	0.1	1.2	0.5	0.04
Q$1888	Q9CY50	SSRA_MOUSE	Ssr1	Translocon-associated protein subunit alpha	1	17.83	5	84480122	76380473	74055492	72798686	22923512	20931097	20596920	21140663	60.7	61.3	62.2	64.9	-1.1	1	-1.1	1	-1.2	1	-1	1	-1	1	-1	1	1
Q$2098	Q9Z1Q5	CLIC1_MOUSE	Clic1	Chloride intracellular channel protein 1	1	60.17	14	82574189	72173193	82409850	102752336	5180624	3721191	3878118	10172512	14	11.5	10.5	22.1	-1.1	0.4	-1	1	1.2	0.4	1.1	0.4	1.4	0.1	1.2	0.4	0.02
Q$185	D3YWH9	D3YWH9_MOUSE	Rps9	40S ribosomal protein S9	1	24.26	6	82224427	72962123	74728724	86569418	12440753	8285697	3539971	10570769	33.8	25.4	10.6	27.3	-1.1	1	-1.1	1	1.1	1	1	1	1.2	0.9	1.2	0.9	0.7
Q$2011	Q9JHJ0	TMOD3_MOUSE	Tmod3	Tropomodulin-3	1	12.78	4	82134978	73423354	76194005	87265717	2928642	2992638	2175412	4937235	8	9.1	6.4	12.7	-1.1	0.3	-1.1	0.4	1.1	0.6	1	0.6	1.2	0.2	1.1	0.3	0.05
Q$1412	Q60604	ADSV_MOUSE	Scin	Adseverin	1	45.31	18	81758198	69445043	79794080	85898338	7243379	3050565	2885480	5166117	19.8	9.8	8.1	13.4	-1.2	0.5	-1	0.9	1.1	0.9	1.1	0.2	1.2	0.1	1.1	0.7	0.2
Q$1059	P40142	TKT_MOUSE	Tkt	Transketolase	1	60.83	35	79697502	56363795	94918304	118204964	12866442	4327735	7138450	9581222	36.1	17.2	16.8	18.1	-1.4	0.2	1.2	0.3	1.5	0.2	1.7	0.009	2.1	0.002	1.2	0.2	0.002
Q$917	P14069	S10A6_MOUSE	S100a6	Protein S100-A6	1	47.19	5	78385110	61132600	74002390	103249850	6329622	3544484	3492976	7014221	18.1	13	10.6	15.2	-1.3	0.1	-1.1	0.6	1.3	0.1	1.2	0.1	1.7	0.004	1.4	0.03	0.0004
Q$955	P17918	PCNA_MOUSE	Pcna	Proliferating cell nuclear antigen	1	86.97	18	77955200	65700013	71379623	81875403	5733543	4257983	5759021	5012421	16.4	14.5	18	13.7	-1.2	0.5	-1.1	0.8	1.1	0.8	1.1	0.8	1.2	0.2	1.1	0.6	0.2
Q$1247	P68368	TBA4A_MOUSE	Tuba4a	Tubulin alpha-4A chain	1	64.06	29	76882218	59783970	78811768	150183718	12134651	9234929	7191660	35082045	35.3	34.5	20.4	52.2	-1.3	0.5	1	0.9	2	0.4	1.3	0.4	2.5	0.3	1.9	0.4	0.02
Q$903	P11352	GPX1_MOUSE	Gpx1	Glutathione peroxidase 1	1	66.17	13	76655030	64017100	79999567	88875407	5891477	3100722	3494438	7121222	17.2	10.8	9.8	17.9	-1.2	0.3	1	0.6	1.2	0.5	1.2	0.05	1.4	0.06	1.1	0.5	0.03
Q$1942	Q9D6R2	IDH3A_MOUSE	Idh3a	Isocitrate dehydrogenase [NAD] subunit alpha, mitochondrial	1	39.34	15	74545704	62094172	69507318	80508009	9816656	5856354	4414337	5116095	29.4	21.1	14.2	14.2	-1.2	0.8	-1.1	0.8	1.1	0.8	1.1	0.8	1.3	0.2	1.2	0.5	0.3
Q$1110	P51150	RAB7A_MOUSE	Rab7a	Ras-related protein Rab-7a	1	36.71	7	74429049	70955502	65030041	138234745	11902516	11628832	8692797	54620639	35.8	36.6	29.9	88.4	-1	0.9	-1.1	0.9	1.9	0.8	-1.1	0.9	1.9	0.8	2.1	0.8	0.3
Q$1203	P62827	RAN_MOUSE	Ran	GTP-binding nuclear protein Ran	1	43.06	11	74419473	54826491	83579316	101008174	4911333	4051551	4808306	4944211	14.8	16.5	12.9	10.9	-1.4	0.04	1.1	0.2	1.4	0.02	1.5	0.009	1.8	0.0005	1.2	0.07	3e-05
Q$1408	Q5SXR6	Q5SXR6_MOUSE	Cltc	Clathrin heavy chain	1	43.9	50	74210057	56056010	82149564	105525962	12536224	5714422	6378408	7541769	37.8	22.8	17.4	16	-1.3	0.4	1.1	0.6	1.4	0.2	1.5	0.08	1.9	0.005	1.3	0.2	0.007
Q$1043	P35441	TSP1_MOUSE	Thbs1	Thrombospondin-1	1	33.08	32	73810774	63119035	74558663	76587512	4437142	3163086	2711201	4056295	13.4	11.2	8.1	11.8	-1.2	0.3	1	1	1	1	1.2	0.1	1.2	0.1	1	1	0.08
Q$1629	Q8BT60	CPNE3_MOUSE	Cpne3	Copine-3	0.9996	8.26	3	73150073	63610716	69264075	73984341	8039729	5036862	4088645	7624062	24.6	17.7	13.2	23	-1.1	0.9	-1.1	0.9	1	0.9	1.1	0.9	1.2	0.9	1.1	0.9	0.7
Q$1231	P63101	1433Z_MOUSE	Ywhaz	14-3-3 protein zeta/delta	1	54.69	15	70433358	51676410	78454972	99803546	11147089	3455403	3887467	6938152	35.4	15	11.1	15.5	-1.4	0.3	1.1	0.5	1.4	0.2	1.5	0.004	1.9	0.002	1.3	0.1	0.002
Q$892	P10605	CATB_MOUSE	Ctsb	Cathepsin B	1	36.58	10	70146338	53234789	73315426	99063285	10308379	3725743	3166716	9155104	32.9	15.6	9.7	20.7	-1.3	0.3	1	0.8	1.4	0.2	1.4	0.02	1.9	0.01	1.4	0.1	0.004
Q$501	E9Q1T9	E9Q1T9_MOUSE	Cse1l	Exportin-2	0.9554	2.51	2	69854263	71141004	63153885	124693907	16636419	16132802	12740640	54543596	53.3	50.7	45.1	97.8	1	1	-1.1	1	1.8	0.9	-1.1	1	1.8	0.9	2	0.9	0.5
Q$963	P19783	COX41_MOUSE	Cox4i1	Cytochrome c oxidase subunit 4 isoform 1, mitochondrial	1	28.99	6	69765892	54702677	72996433	81200756	11792523	4863672	1816480	5000146	37.8	19.9	5.6	13.8	-1.3	0.6	1	0.8	1.2	0.6	1.3	0.04	1.5	0.03	1.1	0.5	0.09
Q$1729	Q8VIJ6	SFPQ_MOUSE	Sfpq	Splicing factor, proline- and glutamine-rich	1	26.61	18	69706696	43077634	82454891	105901363	11361710	4118475	6327458	10074002	36.4	21.4	17.2	21.3	-1.6	0.2	1.2	0.4	1.5	0.2	1.9	0.004	2.5	0.003	1.3	0.2	0.0008
Q$1697	Q8R180	ERO1A_MOUSE	Ero1l	ERO1-like protein alpha	1	38.58	15	67908687	44234045	73389297	84616397	10957686	4442940	4599154	6106620	36.1	22.5	14	16.1	-1.5	0.3	1.1	0.7	1.2	0.4	1.7	0.009	1.9	0.004	1.2	0.4	0.007
Q$1366	Q3U7R1	ESYT1_MOUSE	Esyt1	Extended synaptotagmin-1	1	32.69	24	67872155	57041894	72936719	81873006	9289382	5695505	6925083	5602611	30.6	22.3	21.2	15.3	-1.2	0.7	1.1	0.7	1.2	0.7	1.3	0.5	1.4	0.08	1.1	0.7	0.1
Q$1249	P68373	TBA1C_MOUSE	Tuba1c	Tubulin alpha-1C chain	1	69.93	29	67376862	51278894	72109501	142247165	10879541	7196624	3628018	34145663	36.1	31.4	11.3	53.7	-1.3	0.4	1.1	0.7	2.1	0.3	1.4	0.2	2.8	0.2	2	0.3	0.01
Q$1093	P48962	ADT1_MOUSE	Slc25a4	ADP/ATP translocase 1	1	39.26	13	66794210	60457805	67173919	74899205	6070060	6483424	6052395	7447549	20.3	24	20.1	22.2	-1.1	0.9	1	1	1.1	0.9	1.1	0.9	1.2	0.7	1.1	0.9	0.5
Q$1776	Q93092	TALDO_MOUSE	Taldo1	Transaldolase	1	55.79	19	65912345	40782818	77064470	103698130	11285017	3311604	4207322	7117315	38.3	18.2	12.2	15.3	-1.6	0.2	1.2	0.4	1.6	0.06	1.9	0.0007	2.5	0.0003	1.3	0.05	0.0001
Q$993	P26041	MOES_MOUSE	Msn	Moesin	1	43.67	30	65060563	48059770	79971569	93327675	11486311	5641960	6778177	8215816	39.5	26.3	19	19.7	-1.4	0.5	1.2	0.5	1.4	0.3	1.7	0.03	1.9	0.01	1.2	0.5	0.009
Q$1265	P70677	CASP3_MOUSE	Casp3	Caspase-3	1	17.33	5	64160793	56102791	61389297	65316278	5305474	3343461	1868202	6987200	18.5	13.3	6.8	23.9	-1.1	0.7	-1	0.9	1	0.9	1.1	0.7	1.2	0.7	1.1	0.9	0.5
Q$1463	Q61765	K1H1_MOUSE	Krt31	Keratin, type I cuticular Ha1	1	37.5	18	63155442	59041264	68514191	228967991	4188766	11810344	4203429	134102492	14.8	44.7	13.7	131	-1.1	0.9	1.1	0.9	3.6	0.9	1.2	0.9	3.9	0.9	3.3	0.9	0.3
Q$1053	P36552	HEM6_MOUSE	Cpox	Coproporphyrinogen-III oxidase, mitochondrial	1	54.18	27	62854076	54542895	76516546	91791945	6997728	4883858	6600804	5863685	24.9	20	19.3	14.3	-1.2	0.4	1.2	0.3	1.5	0.06	1.4	0.1	1.7	0.007	1.2	0.3	0.003
Q$1086	P47911	RL6_MOUSE	Rpl6	60S ribosomal protein L6	1	27.36	9	62305921	50692770	71961690	103021951	8865252	5993286	5982350	8092448	31.8	26.4	18.6	17.6	-1.2	0.5	1.2	0.5	1.7	0.05	1.4	0.1	2	0.005	1.4	0.06	0.0008
Q$136	B2RV77	B2RV77_MOUSE	Gm5483	MCG130182, isoform CRA_a	1	73.2	9	61987051	29972398	62278958	80484235	18640591	5655775	7850888	7522810	67.2	42.2	28.2	20.9	-2.1	0.4	1	1	1.3	0.6	2.1	0.05	2.7	0.004	1.3	0.4	0.04
Q$140	B7FAU9	B7FAU9_MOUSE	Flna	Filamin, alpha	1	37.17	67	61683461	49770189	66667010	82752948	7781443	2973294	3709075	5947119	28.2	13.4	12.4	16.1	-1.2	0.3	1.1	0.6	1.3	0.2	1.3	0.04	1.7	0.007	1.2	0.2	0.005
Q$1180	P62242	RS8_MOUSE	Rps8	40S ribosomal protein S8	1	46.15	10	61638859	49530224	68377469	81372393	8013529	3950799	6145994	4711267	29.1	17.8	20.1	12.9	-1.2	0.4	1.1	0.5	1.3	0.2	1.4	0.2	1.6	0.005	1.2	0.3	0.01
Q$856	P05202	AATM_MOUSE	Got2	Aspartate aminotransferase, mitochondrial	1	54.88	15	61221802	51131200	66725223	68607734	7538339	5703629	6563934	6064587	27.5	24.9	22	19.8	-1.2	0.8	1.1	0.8	1.1	0.8	1.3	0.4	1.3	0.3	1	0.8	0.3
Q$870	P08071	TRFL_MOUSE	Ltf	Lactotransferrin	1	46.39	26	60980009	44165118	66186578	87437663	11048912	4429570	7441499	6233865	40.5	22.4	25.1	15.9	-1.4	0.4	1.1	0.7	1.4	0.2	1.5	0.2	2	0.003	1.3	0.2	0.009
Q$1749	Q91YQ5	RPN1_MOUSE	Rpn1	Dolichyl-diphosphooligosaccharide--protein glycosyltransferase subunit 1	1	49.51	23	59683327	43028756	63597962	76100438	8538759	4432019	4826272	6063607	32	23	17	17.8	-1.4	0.4	1.1	0.7	1.3	0.4	1.5	0.07	1.8	0.01	1.2	0.4	0.01
Q$1185	P62281	RS11_MOUSE	Rps11	40S ribosomal protein S11	1	25.32	3	59681958	63924816	55475173	101313219	6427591	8241169	3765540	35747306	24.1	28.8	15.2	78.9	1.1	0.8	-1.1	0.8	1.7	0.8	-1.2	0.8	1.6	0.8	1.8	0.8	0.3
Q$1392	Q3V3R1	C1TM_MOUSE	Mthfd1l	Monofunctional C1-tetrahydrofolate synthase, mitochondrial	1	51.07	29	59537097	53280912	63714440	73559166	5713844	3609775	2398599	4203336	21.5	15.1	8.4	12.8	-1.1	0.6	1.1	0.6	1.2	0.3	1.2	0.2	1.4	0.04	1.2	0.3	0.02
Q$913	P12787	COX5A_MOUSE	Cox5a	Cytochrome c oxidase subunit 5A, mitochondrial	1	48.63	10	59009860	47055578	62854668	67219413	6597130	4454674	3974588	3966403	25	21.2	14.1	13.2	-1.3	0.5	1.1	0.7	1.1	0.7	1.3	0.1	1.4	0.06	1.1	0.7	0.05
Q$1377	Q3UHQ6-2	DOP2_MOUSE	Dopey	Isoform 2 of Protein dopey-2	0.9731	1.52	1	58280350	38558550	65731250	86700500	8849168	4329142	4309981	7644364	34	25.1	14.7	19.7	-1.5	0.2	1.1	0.5	1.5	0.2	1.7	0.01	2.2	0.004	1.3	0.2	0.001
Q$1090	P48036	ANXA5_MOUSE	Anxa5	Annexin A5	1	60.19	18	57888699	48569678	66534373	69546401	7531807	3180494	5299949	5001784	29.1	14.6	17.8	16.1	-1.2	0.7	1.1	0.7	1.2	0.7	1.4	0.09	1.4	0.04	1	0.7	0.06
Q$933	P15864	H12_MOUSE	Hist1h1c	Histone H1.2	1	16.04	6	57709531	57893216	56866039	70718907	6635351	5970583	8064568	6526600	25.7	23.1	31.7	20.6	1	1	-1	1	1.2	0.7	-1	1	1.2	0.7	1.2	0.7	0.4
Q$527	E9Q616	E9Q616_MOUSE	Ahnak	Protein Ahnak	1	7.89	26	57556751	50531775	62449227	70082613	2613656	2830007	2006722	6276752	10.2	12.5	7.2	20	-1.1	0.4	1.1	0.4	1.2	0.4	1.2	0.05	1.4	0.1	1.1	0.4	0.02
Q$742	P13864-2	DNMT1_MOUSE	Dnmt	Isoform 2 of DNA (cytosine-5)-methyltransferase 1	0.9804	1.8	2	57301504	51599089	52882212	56016247	5061629	2770609	2857872	2882433	19.8	12	12.1	11.5	-1.1	0.9	-1.1	0.9	-1	0.9	1	0.9	1.1	0.9	1.1	0.9	0.6
Q$559	O70133-2	DHX9_MOUSE	Dhx	Isoform 2 of ATP-dependent RNA helicase A	1	11.59	14	57282782	50157128	52140545	59212196	3680809	2880434	2454160	1047013	14.4	12.8	10.5	4	-1.1	0.5	-1.1	0.6	1	0.9	1	0.9	1.2	0.1	1.1	0.1	0.1
Q$1770	Q922R8	PDIA6_MOUSE	Pdia6	Protein disulfide-isomerase A6	1	42.73	19	57274818	47829799	60670927	63249988	4645090	2906469	2774346	5071313	18.1	13.6	10.2	17.9	-1.2	0.4	1.1	0.8	1.1	0.8	1.3	0.07	1.3	0.1	1	0.8	0.07
Q$1456	Q61599	GDIR2_MOUSE	Arhgdib	Rho GDP-dissociation inhibitor 2	1	70	13	56945545	35337779	66338770	84269282	10297959	3430861	4254355	4906402	40.4	21.7	14.3	13	-1.6	0.2	1.2	0.4	1.5	0.1	1.9	0.002	2.4	0.0002	1.3	0.09	0.0005
Q$1270	P80317	TCPZ_MOUSE	Cct6a	T-complex protein 1 subunit zeta	1	35.4	16	56897583	48704172	54417447	63801999	6335065	4873468	3876016	3189426	24.9	22.4	15.9	11.2	-1.2	0.8	-1	0.8	1.1	0.8	1.1	0.8	1.3	0.2	1.2	0.4	0.2
Q$1128	P54320	ELN_MOUSE	Eln	Elastin	1	49.19	10	56861317	50641127	56551151	57678240	3280636	2326984	1149565	3440739	12.9	10.3	4.5	13.3	-1.1	0.5	-1	1	1	1	1.1	0.3	1.1	0.5	1	1	0.3
Q$2108	Q9Z2T6	KRT85_MOUSE	Krt85	Keratin, type II cuticular Hb5	1	38.86	30	56829122	58056819	45848824	340301321	6513045	21101282	968831	243133345	25.6	81.3	4.7	159.8	1	1	-1.2	0.7	6	0.8	-1.3	0.8	5.9	0.8	7.4	0.8	0.3
Q$1692	Q8QZT1	THIL_MOUSE	Acat1	Acetyl-CoA acetyltransferase, mitochondrial	1	39.39	12	56406452	50581261	57550793	60128913	4902613	5635658	5107543	4879987	19.4	24.9	19.8	18.1	-1.1	0.9	1	0.9	1.1	0.9	1.1	0.9	1.2	0.8	1	0.9	0.6
Q$959	P19096	FAS_MOUSE	Fasn	Fatty acid synthase	1	26.32	39	55389044	43858098	55905110	71580190	6015260	3833218	3877972	4714714	24.3	19.5	15.5	14.7	-1.3	0.3	1	0.9	1.3	0.2	1.3	0.2	1.6	0.01	1.3	0.2	0.007
Q$1153	P60335	PCBP1_MOUSE	Pcbp1	Poly(rC)-binding protein 1	1	66.29	15	55322809	45518778	53879446	73114535	5147245	2594337	3921183	9691812	20.8	12.7	16.3	29.6	-1.2	0.4	-1	0.8	1.3	0.4	1.2	0.4	1.6	0.2	1.4	0.4	0.03
Q$1281	P84228	H32_MOUSE	Hist1h3b	Histone H3.2	1	44.12	6	55151288	55571586	50050431	84963310	7846856	6704467	5911185	27046474	31.8	27	26.4	71.2	1	1	-1.1	0.9	1.5	0.9	-1.1	0.9	1.5	0.9	1.7	0.8	0.4
Q$1315	Q02053	UBA1_MOUSE	Uba1	Ubiquitin-like modifier-activating enzyme 1	1	38.28	29	55029645	38453413	56101739	69365349	8052207	3893241	4950173	7488118	32.7	22.6	19.7	24.1	-1.4	0.3	1	0.9	1.3	0.4	1.5	0.1	1.8	0.04	1.2	0.4	0.03
Q$772	O35129	PHB2_MOUSE	Phb2	Prohibitin-2	1	43.14	12	54588032	42236004	58934023	62224870	6709210	3428423	2445862	9182707	27.5	18.2	9.3	33	-1.3	0.5	1.1	0.9	1.1	0.9	1.4	0.02	1.5	0.3	1.1	0.9	0.1
Q$934	P16045	LEG1_MOUSE	Lgals1	Galectin-1	1	73.33	9	54497269	35778812	61321216	74515702	10585967	4603022	5016487	6103201	43.4	28.8	18.3	18.3	-1.5	0.4	1.1	0.6	1.4	0.4	1.7	0.03	2.1	0.006	1.2	0.4	0.01
Q$1126	P54071	IDHP_MOUSE	Idh2	Isocitrate dehydrogenase [NADP], mitochondrial	1	43.14	15	54270629	47864035	53481266	68485888	7717982	4766598	7156951	9049782	31.8	22.3	29.9	29.5	-1.1	0.9	-1	0.9	1.3	0.7	1.1	0.9	1.4	0.4	1.3	0.7	0.3
Q$760	O08807	PRDX4_MOUSE	Prdx4	Peroxiredoxin-4	1	23.36	4	54198456	46738932	49239601	60240982	3455339	1836198	842255	5791920	14.3	8.8	3.8	21.5	-1.2	0.4	-1.1	0.5	1.1	0.5	1.1	0.5	1.3	0.4	1.2	0.4	0.07
Q$1785	Q99JY9	ARP3_MOUSE	Actr3	Actin-related protein 3	1	62.92	19	52775469	37742845	58174605	68512434	8068375	3952207	4877388	4699583	34.2	23.4	18.7	15.3	-1.4	0.4	1.1	0.6	1.3	0.4	1.5	0.06	1.8	0.006	1.2	0.4	0.01
Q$2005	Q9ESP1	SDF2L_MOUSE	Sdf2l1	Stromal cell-derived factor 2-like protein 1	1	51.58	5	52542878	45133746	53712053	56462842	3955603	3696765	3594450	3927749	16.8	18.3	15	15.6	-1.2	0.6	1	0.9	1.1	0.9	1.2	0.5	1.3	0.3	1.1	0.9	0.2
Q$1325	Q05816	FABP5_MOUSE	Fabp5	Fatty acid-binding protein, epidermal	1	77.78	14	51821624	37061932	61526525	72637373	6756797	2386884	3268007	3036748	29.2	14.4	11.9	9.3	-1.4	0.1	1.2	0.2	1.4	0.09	1.7	0.002	2	9e-05	1.2	0.1	0.0002
Q$1271	P80318	TCPG_MOUSE	Cct3	T-complex protein 1 subunit gamma	1	44.77	19	51395508	43259018	46502098	54041070	4261399	2033385	1150818	2471947	18.5	10.5	5.5	10.2	-1.2	0.4	-1.1	0.5	1.1	0.6	1.1	0.5	1.2	0.06	1.2	0.1	0.05
Q$1637	Q8BWT1	THIM_MOUSE	Acaa2	3-ketoacyl-CoA thiolase, mitochondrial	1	68.77	22	51067644	42452201	56448818	65050017	5188116	4026561	3046375	5553580	22.7	21.2	12.1	19.1	-1.2	0.5	1.1	0.5	1.3	0.4	1.3	0.1	1.5	0.06	1.2	0.5	0.02
Q$1834	Q9CPU0	LGUL_MOUSE	Glo1	Lactoylglutathione lyase	1	29.89	4	50964309	42785390	49678840	101466210	4619880	3734482	2623703	48825079	20.3	19.5	11.8	107.6	-1.2	0.7	-1	0.8	2	0.8	1.2	0.7	2.4	0.8	2	0.8	0.3
Q$443	E0CZ27	E0CZ27_MOUSE	H3f3a	Histone H3 (Fragment)	1	50.42	6	50392278	50244776	45402108	80543000	7626582	6500497	5516688	26697214	33.8	28.9	27.2	74.1	-1	1	-1.1	0.9	1.6	0.9	-1.1	0.9	1.6	0.9	1.8	0.8	0.3
Q$496	E9Q133	E9Q133_MOUSE	Cct3	T-complex protein 1 subunit gamma	1	40.63	15	49982446	42145250	44905348	51849778	4043990	1902673	1130397	2281753	18.1	10.1	5.6	9.8	-1.2	0.4	-1.1	0.6	1	0.7	1.1	0.6	1.2	0.07	1.2	0.1	0.06
Q$1194	P62702	RS4X_MOUSE	Rps4x	40S ribosomal protein S4, X isoform	1	47.53	16	49902770	39918852	60172052	78339721	8029319	5348511	5766100	5832268	36	30	21.4	16.6	-1.3	0.6	1.2	0.6	1.6	0.1	1.5	0.1	2	0.008	1.3	0.2	0.004
Q$1071	P43430	MCPT8_MOUSE	Mcpt8	Mast cell protease 8	1	29.96	9	49859618	29639609	56350970	51948609	3729147	4114771	9110746	6956169	16.7	31	36.2	29.9	-1.7	0.04	1.1	0.9	1	0.9	1.9	0.1	1.8	0.1	-1.1	0.9	0.04
Q$879	P08905	LYZ2_MOUSE	Lyz2	Lysozyme C-2	1	49.32	10	49508446	33730835	53000112	55465806	10492601	4041777	4755839	4112808	47.4	26.8	20.1	16.6	-1.5	0.6	1.1	0.9	1.1	0.9	1.6	0.07	1.6	0.03	1	0.9	0.1
Q$1580	Q80YQ1	Q80YQ1_MOUSE	Thbs1	Thrombospondin 1	1	32.28	31	49395274	41272735	49826763	51174412	4644214	3461285	2986244	2474345	21	18.8	13.4	10.8	-1.2	0.6	1	1	1	1	1.2	0.4	1.2	0.3	1	1	0.2
Q$1156	P60843	IF4A1_MOUSE	Eif4a1	Eukaryotic initiation factor 4A-I	1	58.87	19	49240807	37137588	55237676	82126023	10136381	3849147	5385011	5847544	46	23.2	21.8	15.9	-1.3	0.5	1.1	0.6	1.7	0.09	1.5	0.09	2.2	0.001	1.5	0.05	0.002
Q$1058	P40124	CAP1_MOUSE	Cap1	Adenylyl cyclase-associated protein 1	1	52.11	24	48455115	38347408	51646777	62232174	7982563	4071971	4270437	4409437	36.8	23.7	18.5	15.8	-1.3	0.5	1.1	0.7	1.3	0.4	1.3	0.2	1.6	0.02	1.2	0.4	0.05
Q$1241	P67778	PHB_MOUSE	Phb	Prohibitin	1	71.69	20	48264143	42021656	50950073	52472800	4556542	5034665	4707210	4315106	21.1	26.8	20.7	18.4	-1.1	0.9	1.1	0.9	1.1	0.9	1.2	0.7	1.2	0.6	1	0.9	0.4
Q$99	A6ZI46	A6ZI46_MOUSE	Aldoart1	Fructose-bisphosphate aldolase	1	41.05	21	47473138	29391329	57397666	69218320	10375499	4630585	5589698	5418751	48.9	35.2	21.8	17.5	-1.6	0.4	1.2	0.4	1.5	0.3	2	0.02	2.4	0.003	1.2	0.4	0.006
Q$1920	Q9D1A2	CNDP2_MOUSE	Cndp2	Cytosolic non-specific dipeptidase	1	57.47	20	47373127	29716845	51651084	67960718	7368780	2961432	3158426	2432405	34.8	22.3	13.7	8	-1.6	0.1	1.1	0.6	1.4	0.08	1.7	0.005	2.3	5e-05	1.3	0.01	0.0002
Q$952	P17751	TPIS_MOUSE	Tpi1	Triosephosphate isomerase	1	63.88	22	47152477	30925103	55690994	68606338	8484912	5198096	4952655	5634286	40.2	37.6	19.9	18.4	-1.5	0.3	1.2	0.4	1.5	0.2	1.8	0.04	2.2	0.007	1.2	0.3	0.005
Q$1267	P80313	TCPH_MOUSE	Cct7	T-complex protein 1 subunit eta	1	51.84	19	46956785	38514587	48523153	99091917	3455267	5163013	2174709	43232376	16.5	30	10	97.6	-1.2	0.7	1	0.7	2.1	0.7	1.3	0.5	2.6	0.7	2	0.7	0.2
Q$2023	Q9JKF1	IQGA1_MOUSE	Iqgap1	Ras GTPase-activating-like protein IQGAP1	1	35.49	33	46219986	37022546	58318607	78820217	5520840	3365046	4060312	8203183	26.7	20.3	15.6	23.3	-1.2	0.2	1.3	0.2	1.7	0.04	1.6	0.02	2.1	0.009	1.4	0.2	0.0005
Q$1393	Q497I4	KRT35_MOUSE	Krt35	Keratin, type I cuticular Ha5	1	34.73	16	45808012	40041712	46529381	97795685	2799502	2451212	2019850	36928017	13.7	13.7	9.7	84.4	-1.1	0.6	1	0.8	2.1	0.6	1.2	0.4	2.4	0.6	2.1	0.6	0.1
Q$1415	Q60605-2	MYL6_MOUSE	Myl	Isoform Smooth muscle of Myosin light polypeptide 6	1	65.56	9	45728690	31792693	46575652	64658857	8843852	4465169	4059875	5778135	43.2	31.4	19.5	20	-1.4	0.4	1	0.9	1.4	0.3	1.5	0.2	2	0.01	1.4	0.2	0.01
Q$1866	Q9CR57	RL14_MOUSE	Rpl14	60S ribosomal protein L14	1	25.35	7	45497435	37778117	51895986	65016023	4236695	2090609	2349297	5535674	20.8	12.4	10.1	19	-1.2	0.3	1.1	0.3	1.4	0.09	1.4	0.01	1.7	0.01	1.3	0.2	0.001
Q$908	Q542I8	Q542I8_MOUSE	Itgb2	Integrin beta	1	48.44	29	45425030	36547457	49468847	54195651	4756825	1878493	1961878	3247788	23.4	11.5	8.9	13.4	-1.2	0.4	1.1	0.5	1.2	0.4	1.4	0.009	1.5	0.009	1.1	0.4	0.008
Q$1214	P62908	RS3_MOUSE	Rps3	40S ribosomal protein S3	1	47.74	15	45258016	33497210	50239307	83207008	9683165	5307647	6602674	17010768	47.8	35.4	29.4	45.7	-1.4	0.5	1.1	0.7	1.8	0.4	1.5	0.4	2.5	0.2	1.7	0.4	0.03
Q$894	P10649	GSTM1_MOUSE	Gstm1	Glutathione S-transferase Mu 1	1	48.62	13	45195590	37513550	42701787	48290820	6821091	3899525	4800393	3342829	33.7	23.2	25.1	15.5	-1.2	0.9	-1.1	0.9	1.1	0.9	1.1	0.9	1.3	0.3	1.1	0.9	0.5
Q$1414	Q60605	MYL6_MOUSE	Myl6	Myosin light polypeptide 6	1	47.68	7	44228667	30558544	45242663	63140242	8552104	4322697	3977067	5736532	43.2	31.6	19.7	20.3	-1.4	0.3	1	0.9	1.4	0.3	1.5	0.2	2.1	0.01	1.4	0.2	0.01
Q$1935	Q9D3D9	ATPD_MOUSE	Atp5d	ATP synthase subunit delta, mitochondrial	1	58.33	5	43811010	36403741	45341950	50405794	4217605	2870064	3590967	6184867	21.5	17.6	17.7	27.4	-1.2	0.6	1	0.8	1.2	0.8	1.2	0.4	1.4	0.4	1.1	0.8	0.2
Q$820	O88569	ROA2_MOUSE	Hnrnpa2b1	Heterogeneous nuclear ribonucleoproteins A2/B1	1	44.19	22	43777079	33872593	55602999	68324943	6478935	3968898	3559229	4396507	33.1	26.2	14.3	14.4	-1.3	0.3	1.3	0.3	1.6	0.05	1.6	0.02	2	0.002	1.2	0.2	0.0006
Q$2030	Q9QUM0	ITA2B_MOUSE	Itga2b	Integrin alpha-IIb	1	32.53	20	43451459	34847517	45813036	52057123	4390726	2368219	2023696	3960577	22.6	15.2	9.9	17	-1.2	0.4	1.1	0.6	1.2	0.5	1.3	0.04	1.5	0.03	1.1	0.5	0.02
Q$1401	Q5SQB0	Q5SQB0_MOUSE	Npm1	Nucleophosmin	1	50.76	14	43302300	32196793	53730532	68624834	6548675	4285480	5254442	6498697	33.8	29.8	21.9	21.2	-1.3	0.3	1.2	0.3	1.6	0.1	1.7	0.06	2.1	0.009	1.3	0.3	0.003
Q$1529	Q6P4T2	U520_MOUSE	Snrnp200	U5 small nuclear ribonucleoprotein 200 kDa helicase	1	8.75	14	42743451	30012233	44593660	57448923	5391387	1897104	3444146	3578940	28.2	14.1	17.3	13.9	-1.4	0.1	1	0.8	1.3	0.1	1.5	0.03	1.9	0.0008	1.3	0.1	0.001
Q$1108	P50543	S10AB_MOUSE	S100a11	Protein S100-A11	1	77.55	9	42237763	34288247	48839141	49204366	6426649	2916246	1977073	1987751	34	19	9.1	9	-1.2	0.7	1.2	0.7	1.2	0.7	1.4	0.02	1.4	0.02	1	0.9	0.04
Q$868	P08003	PDIA4_MOUSE	Pdia4	Protein disulfide-isomerase A4	1	56.27	27	41660994	33604596	44741712	88034944	4683364	4245711	4752597	36549034	25.1	28.3	23.8	92.8	-1.2	0.7	1.1	0.7	2.1	0.7	1.3	0.5	2.6	0.7	2	0.7	0.2
Q$1897	Q9CZ13	QCR1_MOUSE	Uqcrc1	Cytochrome b-c1 complex subunit 1, mitochondrial	1	42.08	17	41647234	36232264	40816024	42777358	3941712	4625566	4134515	4165918	21.2	28.5	22.7	21.8	-1.1	0.9	-1	1	1	1	1.1	0.9	1.2	0.9	1	1	0.7
Q$1806	Q99LC3	NDUAA_MOUSE	Ndufa10	NADH dehydrogenase [ubiquinone] 1 alpha subcomplex subunit 10, mitochondrial	1	26.76	7	41528360	38911887	37093971	45883546	4552023	4196251	2545794	7394931	24.5	24.1	15.3	36	-1.1	0.9	-1.1	0.9	1.1	0.9	-1	0.9	1.2	0.9	1.2	0.9	0.6
Q$859	P06745	G6PI_MOUSE	Gpi	Glucose-6-phosphate isomerase	1	42.83	20	41194018	26371098	41293788	62874108	8948474	3319090	3735856	9236560	48.6	28.1	20.2	32.8	-1.6	0.3	1	1	1.5	0.3	1.6	0.08	2.4	0.03	1.5	0.2	0.01
Q$1949	Q9D883	U2AF1_MOUSE	U2af1	Splicing factor U2AF 35 kDa subunit	1	37.24	5	40289767	28654391	50969127	64395856	7579716	3624507	4674087	4562122	42.1	28.3	20.5	15.8	-1.4	0.4	1.3	0.4	1.6	0.1	1.8	0.03	2.2	0.002	1.3	0.2	0.002
Q$932	P15532	NDKA_MOUSE	Nme1	Nucleoside diphosphate kinase A	1	57.24	11	40071261	26064699	48801386	66024527	6365812	2823719	3628294	5272993	35.5	24.2	16.6	17.9	-1.5	0.2	1.2	0.3	1.6	0.05	1.9	0.006	2.5	0.0009	1.4	0.08	0.0002
Q$815	O88342	WDR1_MOUSE	Wdr1	WD repeat-containing protein 1	1	22.77	11	40026509	30909274	52865596	62143229	9120783	4589595	5619810	5821899	51	33.2	23.8	20.9	-1.3	0.6	1.3	0.6	1.6	0.3	1.7	0.08	2	0.02	1.2	0.6	0.02
Q$1068	P43275	H11_MOUSE	Hist1h1a	Histone H1.1	1	16.9	7	40006122	43719392	51520531	58704437	6241820	6368685	5282052	6522322	34.9	32.6	22.9	24.8	1.1	0.8	1.3	0.6	1.5	0.4	1.2	0.8	1.3	0.5	1.1	0.8	0.2
Q$1677	Q8K0Y2	KT33A_MOUSE	Krt33a	Keratin, type I cuticular Ha3-I	1	29.21	10	39974669	39371429	42677924	141781815	2115734	7950921	3489290	86863669	11.8	45.2	18.3	137	-1	0.9	1.1	0.9	3.5	0.9	1.1	0.9	3.6	0.9	3.3	0.9	0.3
Q$1104	P50247	SAHH_MOUSE	Ahcy	Adenosylhomocysteinase	1	17.36	6	39870875	36770864	39503417	44006499	3688638	1978971	2452780	1796590	20.7	12	13.9	9.1	-1.1	0.8	-1	0.9	1.1	0.8	1.1	0.8	1.2	0.2	1.1	0.6	0.3
Q$1769	Q922Q8	LRC59_MOUSE	Lrrc59	Leucine-rich repeat-containing protein 59	1	30.62	9	39763989	27417288	46656970	57189141	8243384	4811937	4845446	4653241	46.4	39.2	23.2	18.2	-1.5	0.4	1.2	0.5	1.4	0.4	1.7	0.1	2.1	0.01	1.2	0.4	0.02
Q$1804	Q99LB4	Q99LB4_MOUSE	Capg	Capping protein (Actin filament), gelsolin-like	1	50.43	14	39694245	27798190	47895326	53983597	8101648	4408835	3910464	4279245	45.6	35.5	18.3	17.7	-1.4	0.5	1.2	0.5	1.4	0.5	1.7	0.05	1.9	0.02	1.1	0.5	0.02
Q$1306	P99027	RLA2_MOUSE	Rplp2	60S acidic ribosomal protein P2	1	80.87	10	39250650	29409917	45089062	55718175	7005958	4698243	5807767	4195220	39.9	35.7	28.8	16.8	-1.3	0.5	1.1	0.5	1.4	0.3	1.5	0.3	1.9	0.02	1.2	0.4	0.03
Q$1303	P97861	KRT86_MOUSE	Krt86	Keratin, type II cuticular Hb6	1	7.61	3	39191013	38067355	40807194	43907177	6255903	5686622	6296643	7640409	35.7	33.4	34.5	38.9	-1	1	1	1	1.1	1	1.1	1	1.2	1	1.1	1	0.9
Q$1050	P35979	RL12_MOUSE	Rpl12	60S ribosomal protein L12	1	54.55	8	39144090	32937250	39452954	60868720	6981626	5000889	5258677	17250961	39.9	34	29.8	63.4	-1.2	0.8	1	1	1.6	0.8	1.2	0.8	1.8	0.7	1.5	0.8	0.3
Q$1250	P68433	H31_MOUSE	Hist1h3a	Histone H3.1	1	35.29	4	39010163	37628780	38259817	65134833	4755336	3904834	2970542	19145282	27.3	23.2	17.4	65.7	-1	1	-1	1	1.7	0.8	1	1	1.7	0.8	1.7	0.8	0.2
Q$1534	Q6PB66	LPPRC_MOUSE	Lrpprc	Leucine-rich PPR motif-containing protein, mitochondrial	1	10.99	12	38988642	36121051	38017302	74452685	3429607	9805337	5114923	25365513	19.7	60.7	30.1	76.2	-1.1	1	-1	1	1.9	0.7	1.1	1	2.1	0.7	2	0.7	0.2
Q$1683	Q8K2B3	DHSA_MOUSE	Sdha	Succinate dehydrogenase [ubiquinone] flavoprotein subunit, mitochondrial	1	45.03	17	38975308	31884353	42301136	66019873	6074969	3546674	3555924	13871634	34.9	24.9	18.8	47	-1.2	0.6	1.1	0.6	1.7	0.4	1.3	0.3	2.1	0.3	1.6	0.4	0.04
Q$1968	Q9DBH5	LMAN2_MOUSE	Lman2	Vesicular integral-membrane protein VIP36	1	20.11	4	38761761	27159459	45876550	58815033	8509911	3934837	4871954	4837935	49.1	32.4	23.7	18.4	-1.4	0.4	1.2	0.5	1.5	0.3	1.7	0.08	2.2	0.006	1.3	0.3	0.01
Q$1511	Q64727	VINC_MOUSE	Vcl	Vinculin	1	21.2	13	38657221	32957458	37846771	41450618	3090545	1240109	3616019	3635690	17.9	8.4	21.4	19.6	-1.2	0.5	-1	0.9	1.1	0.9	1.1	0.7	1.3	0.3	1.1	0.9	0.3
Q$1822	Q99P88	NU155_MOUSE	Nup155	Nuclear pore complex protein Nup155	0.9978	2.23	2	38640423	32590221	32647300	32203620	4521048	4459767	7682462	6757010	26.2	30.6	52.6	46.9	-1.2	0.9	-1.2	1	-1.2	1	1	1	-1	1	-1	1	0.9
Q$984	P24527	LKHA4_MOUSE	Lta4h	Leukotriene A-4 hydrolase	1	32.9	15	38637159	24249812	41390267	61118594	6803940	2514301	3355041	5899657	39.4	23.2	18.1	21.6	-1.6	0.2	1.1	0.7	1.6	0.1	1.7	0.02	2.5	0.003	1.5	0.08	0.0008
Q$1788	Q99KC8	VMA5A_MOUSE	Vwa5a	von Willebrand factor A domain-containing protein 5A	1	21.56	8	38225866	21612868	38224291	56432219	8651480	2958767	2777628	4522874	50.6	30.6	16.2	17.9	-1.8	0.3	-1	1	1.5	0.3	1.8	0.02	2.6	0.001	1.5	0.04	0.003
Q$830	O89053	COR1A_MOUSE	Coro1a	Coronin-1A	1	42.52	14	37884835	25668477	41506790	53839614	5845472	1937460	3065499	4279201	34.5	16.9	16.5	17.8	-1.5	0.2	1.1	0.6	1.4	0.2	1.6	0.01	2.1	0.002	1.3	0.2	0.002
Q$1910	Q9D0K2	SCOT1_MOUSE	Oxct1	Succinyl-CoA:3-ketoacid coenzyme A transferase 1, mitochondrial	1	33.65	11	37845687	28449677	40610587	44898206	5066175	2917497	2452560	4449874	29.9	22.9	13.5	22.2	-1.3	0.5	1.1	0.7	1.2	0.7	1.4	0.07	1.6	0.07	1.1	0.7	0.05
Q$1980	Q9DCD0	6PGD_MOUSE	Pgd	6-phosphogluconate dehydrogenase, decarboxylating	1	54.87	21	37636441	27023378	39027946	52351812	6894994	1930843	3005515	3668327	41	16	17.2	15.7	-1.4	0.4	1	0.9	1.4	0.3	1.4	0.05	1.9	0.002	1.3	0.09	0.007
Q$1954	Q9D8N0	EF1G_MOUSE	Eef1g	Elongation factor 1-gamma	1	30.66	11	37466242	30477890	40134389	53447851	4155827	2156270	2831986	7793481	24.8	15.8	15.8	32.6	-1.2	0.4	1.1	0.6	1.4	0.4	1.3	0.1	1.8	0.2	1.3	0.4	0.02
Q$1166	P61358	RL27_MOUSE	Rpl27	60S ribosomal protein L27	1	24.26	5	37345081	33147939	37609591	41784645	2432622	851660	1147190	2498519	14.6	5.7	6.8	13.4	-1.1	0.5	1	0.9	1.1	0.5	1.1	0.07	1.3	0.07	1.1	0.5	0.04
Q$464	E9PX41	E9PX41_MOUSE	Zswim6	Zinc finger SWIM domain-containing protein 6	0.9337	4.14	1	36655000	37330100	36109200	39745100	4763002	4359924	4284550	4015889	29.1	26.1	26.5	22.6	1	1	-1	1	1.1	1	-1	1	1.1	1	1.1	1	0.9
Q$1624	Q8BMS1	ECHA_MOUSE	Hadha	Trifunctional enzyme subunit alpha, mitochondrial	1	44.95	21	36053498	30843206	44887601	49850433	4151645	2146835	3507412	3927945	25.7	15.6	17.5	17.6	-1.2	0.5	1.2	0.4	1.4	0.2	1.5	0.04	1.6	0.02	1.1	0.5	0.007
Q$1087	P47955	RLA1_MOUSE	Rplp1	60S acidic ribosomal protein P1	1	51.75	4	35883036	31051211	33502718	31766436	985535	2645853	1565421	2142493	6.1	19.1	10.4	15.1	-1.2	0.5	-1.1	0.7	-1.1	0.5	1.1	0.8	1	0.8	-1.1	0.8	0.3
Q$1618	Q8BLF1	NCEH1_MOUSE	Nceh1	Neutral cholesterol ester hydrolase 1	1	16.91	3	35674775	27401511	39461098	50922985	5535276	3378488	2933122	4499464	34.7	27.6	16.6	19.8	-1.3	0.4	1.1	0.6	1.4	0.2	1.4	0.1	1.9	0.02	1.3	0.2	0.009
Q$784	O35639	ANXA3_MOUSE	Anxa3	Annexin A3	1	42.72	10	35229980	28894430	28787344	36697559	3620425	2520995	2881329	3609370	23	19.5	22.4	22	-1.2	0.6	-1.2	0.6	1	1	-1	1	1.3	0.5	1.3	0.5	0.2
Q$1105	P50446	K2C6A_MOUSE	Krt6a	Keratin, type II cytoskeletal 6A	1	8.32	8	35154154	32592718	26877140	30402825	1511207	1452620	1643402	1146585	9.6	10	13.7	8.4	-1.1	0.4	-1.3	0.04	-1.2	0.1	-1.2	0.1	-1.1	0.4	1.1	0.3	0.007
Q$1784	Q99JY0	ECHB_MOUSE	Hadhb	Trifunctional enzyme subunit beta, mitochondrial	1	41.47	14	35147729	29643893	33836126	63049157	5281884	3283365	4303924	24261524	33.6	24.8	28.4	86	-1.2	0.8	-1	0.9	1.8	0.8	1.1	0.8	2.1	0.8	1.9	0.8	0.3
Q$1598	Q8BH61	F13A_MOUSE	F13a1	Coagulation factor XIII A chain	1	33.33	17	34943330	26217296	35922440	42522522	6301118	2965625	3257016	2874983	40.3	25.3	20.3	15.1	-1.3	0.6	1	0.9	1.2	0.6	1.4	0.3	1.6	0.03	1.2	0.5	0.08
Q$1182	P62259	1433E_MOUSE	Ywhae	14-3-3 protein epsilon	1	38.82	8	34840577	26615634	36111088	43125139	4042858	1584656	2862167	1501035	25.9	13.3	17.7	7.8	-1.3	0.2	1	0.8	1.2	0.2	1.4	0.1	1.6	0.0004	1.2	0.2	0.005
Q$1759	Q921H8	THIKA_MOUSE	Acaa1a	3-ketoacyl-CoA thiolase A, peroxisomal	1	38.92	12	34636228	31131600	30915233	34024782	3469980	3754084	1897153	1965967	22.4	27	13.7	12.9	-1.1	0.9	-1.1	0.9	-1	1	-1	1	1.1	0.9	1.1	0.9	0.7
Q$1679	Q8K1B8	URP2_MOUSE	Fermt3	Fermitin family homolog 3	1	37.59	18	34460248	26533407	37966736	48255680	4732875	2068165	3012747	2750040	30.7	17.4	17.7	12.7	-1.3	0.3	1.1	0.5	1.4	0.1	1.4	0.07	1.8	0.001	1.3	0.1	0.002
Q$983	P24369	PPIB_MOUSE	Ppib	Peptidyl-prolyl cis-trans isomerase B	1	51.85	11	34322236	26721767	36406659	39593794	3539542	2147156	2642506	3760476	23.1	18	16.2	21.2	-1.3	0.4	1.1	0.8	1.2	0.7	1.4	0.1	1.5	0.1	1.1	0.8	0.05
Q$1224	P63028	TCTP_MOUSE	Tpt1	Translationally-controlled tumor protein	1	51.74	8	34197251	29010812	35621006	42336285	3712334	1961319	1735355	1619578	24.3	15.1	10.9	8.6	-1.2	0.4	1	0.7	1.2	0.2	1.2	0.1	1.5	0.005	1.2	0.1	0.01
Q$106	B0V2N7	B0V2N7_MOUSE	Anxa2	Annexin (Fragment)	1	79.08	13	33927218	31665008	38323194	33999437	4185933	2537886	2662161	2943748	27.6	17.9	15.5	19.4	-1.1	0.9	1.1	0.9	1	1	1.2	0.5	1.1	0.9	-1.1	0.8	0.5
Q$985	P24547	IMDH2_MOUSE	Impdh2	Inosine-5'-monophosphate dehydrogenase 2	1	27.24	9	33748390	27637926	43473802	45722655	4255916	2836428	5079190	2254946	28.2	22.9	26.1	11	-1.2	0.5	1.3	0.4	1.4	0.1	1.6	0.1	1.7	0.006	1.1	0.7	0.01
Q$1967	Q9DBG6	RPN2_MOUSE	Rpn2	Dolichyl-diphosphooligosaccharide--protein glycosyltransferase subunit 2	1	43.26	19	33242497	29084750	36170088	40473391	3467160	2126936	2936716	2350794	23.3	16.4	18.2	13	-1.1	0.6	1.1	0.6	1.2	0.4	1.2	0.4	1.4	0.04	1.1	0.6	0.06
Q$1690	Q8K557	ONEC3_MOUSE	Onecut3	One cut domain family member 3	1	37.35	7	33172839	26842791	42260266	45731312	6260567	3896021	3074440	3551961	42.2	32.5	16.3	17.4	-1.2	0.7	1.3	0.5	1.4	0.4	1.6	0.07	1.7	0.04	1.1	0.7	0.03
Q$710	H3BKL5	H3BKL5_MOUSE	Acaa1a	3-ketoacyl-CoA thiolase A, peroxisomal	1	36.19	9	32912142	29671621	29308043	32204355	3331661	3623749	1823404	1857839	22.6	27.3	13.9	12.9	-1.1	1	-1.1	0.9	-1	1	-1	1	1.1	1	1.1	0.9	0.7
Q$997	P26443	DHE3_MOUSE	Glud1	Glutamate dehydrogenase 1, mitochondrial	1	42.47	20	32764239	29949902	35700590	38964215	4661975	3454658	3667218	3585977	31.8	25.8	23	20.6	-1.1	0.9	1.1	0.9	1.2	0.8	1.2	0.8	1.3	0.5	1.1	0.9	0.4
Q$1625	Q8BN21-2	VRK2_MOUSE	Vrk	Isoform 2 of Serine/threonine-protein kinase VRK2	0.9964	2.86	1	32489050	30174550	26542450	27108500	3457445	3149554	3608722	2729614	23.8	23.3	30.4	22.5	-1.1	0.9	-1.2	0.8	-1.2	0.8	-1.1	0.9	-1.1	0.9	1	0.9	0.5
Q$1181	P62245	RS15A_MOUSE	Rps15a	40S ribosomal protein S15a	1	46.15	6	32464934	22118825	36792198	49322176	5955435	2614412	3727867	3706215	41	26.4	22.7	16.8	-1.5	0.3	1.1	0.6	1.5	0.2	1.7	0.06	2.2	0.002	1.3	0.2	0.003
Q$1385	Q3UV11	Q3UV11_MOUSE	Krt6b	Keratin, type II cytoskeletal 6B	1	3.97	3	32424462	30538154	23904617	26477487	1585882	1605236	1506746	608430	10.9	11.8	14.1	5.1	-1.1	0.4	-1.4	0.03	-1.2	0.04	-1.3	0.07	-1.2	0.1	1.1	0.3	0.002
Q$873	P08207	S10AA_MOUSE	S100a10	Protein S100-A10	1	58.76	5	32331815	30855449	28166893	29075122	2479992	988926	1052611	1104749	17.2	7.2	8.4	8.5	-1	0.8	-1.1	0.6	-1.1	0.7	-1.1	0.5	-1.1	0.7	1	0.8	0.3
Q$1234	P63242	IF5A1_MOUSE	Eif5a	Eukaryotic translation initiation factor 5A-1	1	66.23	15	32295463	22725892	37990497	49344973	5479575	2655131	2526499	3125979	37.9	26.1	14.9	14.2	-1.4	0.3	1.2	0.4	1.5	0.09	1.7	0.02	2.2	0.001	1.3	0.09	0.0009
Q$920	P14148	RL7_MOUSE	Rpl7	60S ribosomal protein L7	1	41.48	15	31955390	24906042	34496513	46429940	4469498	2511114	2631561	3217905	31.3	22.5	17.1	15.5	-1.3	0.4	1.1	0.6	1.5	0.1	1.4	0.1	1.9	0.005	1.3	0.1	0.003
Q$1907	Q9D0E1-2	HNRPM_MOUSE	Hnrnp	Isoform 2 of Heterogeneous nuclear ribonucleoprotein M	1	31.45	19	31927557	28824065	33742606	43713534	3087775	2664769	3943490	8636017	21.6	20.7	26.1	44.2	-1.1	0.8	1.1	0.8	1.4	0.7	1.2	0.8	1.5	0.7	1.3	0.8	0.2
Q$1854	Q9CQN1	TRAP1_MOUSE	Trap1	Heat shock protein 75 kDa, mitochondrial	1	26.35	10	31742198	26929166	34738443	36660702	4269995	2818927	3771816	2622587	30.1	23.4	24.3	16	-1.2	0.8	1.1	0.9	1.2	0.8	1.3	0.5	1.4	0.2	1.1	0.9	0.2
Q$1216	P62918	RL8_MOUSE	Rpl8	60S ribosomal protein L8	1	40.08	12	31733689	24334376	35252283	50475348	6667149	4274730	5213249	6336314	47	39.3	33.1	28.1	-1.3	0.6	1.1	0.7	1.6	0.3	1.4	0.4	2.1	0.05	1.4	0.3	0.03
Q$1035	P34884	MIF_MOUSE	Mif	Macrophage migration inhibitory factor	1	89.57	6	31666556	19256531	33703695	54393959	7233084	3500792	3774831	10317011	51.1	40.7	25	42.4	-1.6	0.3	1.1	0.8	1.7	0.3	1.8	0.1	2.8	0.07	1.6	0.3	0.02
Q$1429	Q61001	LAMA5_MOUSE	Lama5	Laminin subunit alpha-5	0.901	0.38	1	31426600	18126900	35401700	49774700	6049731	2399681	2823601	3672958	43	29.6	17.8	16.5	-1.7	0.1	1.1	0.6	1.6	0.09	2	0.008	2.7	0.0005	1.4	0.06	0.0004
Q$1005	P27659	RL3_MOUSE	Rpl3	60S ribosomal protein L3	1	21.84	9	31377580	23451604	40087907	54165168	7143096	4502289	4660918	5651399	50.9	42.9	26	23.3	-1.3	0.6	1.3	0.6	1.7	0.2	1.7	0.2	2.3	0.02	1.4	0.2	0.008
Q$896	Q8CGP2-2	H2B1P_MOUSE	Hist1h2b	Isoform 2 of Histone H2B type 1-P	1	32.61	6	31006196	32160121	28182459	54953790	6375267	6134964	4797338	23245224	46	42.7	38.1	94.6	1	0.9	-1.1	0.9	1.8	0.9	-1.1	0.9	1.7	0.9	1.9	0.9	0.4
Q$1789	Q99KE1	MAOM_MOUSE	Me2	NAD-dependent malic enzyme, mitochondrial	1	46.18	16	30978037	24686570	30517292	34357248	1822711	598270	961984	2596249	13.2	5.4	7	16.9	-1.3	0.05	-1	0.8	1.1	0.5	1.2	0.005	1.4	0.07	1.1	0.5	0.008
Q$834	P00405	COX2_MOUSE	Mtco2	Cytochrome c oxidase subunit 2	1	32.16	5	30974074	31005003	35055134	36562416	2559720	7115330	5131177	6058617	18.5	51.3	32.7	37.1	1	1	1.1	1	1.2	1	1.1	1	1.2	1	1	1	0.8
Q$1008	P28293	CATG_MOUSE	Ctsg	Cathepsin G	1	41.38	13	30910608	26709966	31782985	31713025	5106971	3966583	5685022	2540339	36.9	33.2	40	17.9	-1.2	1	1	1	1	1	1.2	1	1.2	0.9	-1	1	0.8
Q$972	P21107-2	TPM3_MOUSE	Tpm	Isoform 2 of Tropomyosin alpha-3 chain	1	56.45	20	30644613	22013814	35309053	43982155	4402381	2593204	3751841	3522096	32.1	26.3	23.8	17.9	-1.4	0.3	1.2	0.4	1.4	0.2	1.6	0.09	2	0.006	1.2	0.3	0.005
Q$1308	Q00612	G6PD1_MOUSE	G6pdx	Glucose-6-phosphate 1-dehydrogenase X	1	31.26	12	30483282	21590677	35399941	48992066	6472336	3044260	4525021	4632051	47.5	31.5	28.6	21.1	-1.4	0.4	1.2	0.6	1.6	0.2	1.6	0.2	2.3	0.007	1.4	0.2	0.008
Q$1736	Q91VI7	RINI_MOUSE	Rnh1	Ribonuclease inhibitor	1	70.83	26	30461927	23538481	35855373	45206829	4970428	1877999	2737966	2351096	36.5	17.8	17.1	11.6	-1.3	0.4	1.2	0.4	1.5	0.1	1.5	0.03	1.9	0.0006	1.3	0.1	0.002
Q$2017	Q9JIK5	DDX21_MOUSE	Ddx21	Nucleolar RNA helicase 2	1	22.56	15	30352986	26867700	31633845	38939054	3395409	3419003	2091479	3686751	25	28.5	14.8	21.2	-1.1	0.7	1	0.8	1.3	0.5	1.2	0.6	1.4	0.2	1.2	0.5	0.1
Q$2029	Q9QUI0	RHOA_MOUSE	Rhoa	Transforming protein RhoA	1	60.1	10	30222798	22455608	34724760	40085247	5175080	2426515	2291469	2148044	38.3	24.2	14.8	12	-1.3	0.4	1.1	0.4	1.3	0.4	1.5	0.03	1.8	0.004	1.2	0.4	0.01
Q$152	B8JK32	B8JK32_MOUSE	Hnrnpm	Heterogeneous nuclear ribonucleoprotein M	1	29.6	17	30135073	27428148	31672811	39765704	2783710	2432553	3670415	7667671	20.7	19.8	25.9	43.1	-1.1	0.8	1.1	0.8	1.3	0.8	1.2	0.8	1.4	0.7	1.3	0.8	0.3
Q$1245	P68040	GBLP_MOUSE	Gnb2l1	Guanine nucleotide-binding protein subunit beta-2-like 1	1	61.51	14	30074798	22651175	33611801	42082100	5337271	2710000	3661269	3492864	39.7	26.8	24.4	18.6	-1.3	0.4	1.1	0.6	1.4	0.3	1.5	0.2	1.9	0.01	1.3	0.3	0.02
Q$2112	Q9Z2X1	HNRPF_MOUSE	Hnrnpf	Heterogeneous nuclear ribonucleoprotein F	1	40.72	14	29879854	20955330	36577470	45961238	6980941	3420062	3444458	2993485	52.2	36.5	21.1	14.6	-1.4	0.5	1.2	0.5	1.5	0.2	1.7	0.06	2.2	0.003	1.3	0.2	0.009
Q$1323	Q05144	RAC2_MOUSE	Rac2	Ras-related C3 botulinum toxin substrate 2	1	28.13	8	29766709	22328504	35178344	42122154	4666520	2474650	1930724	2356929	35.1	24.8	12.3	12.5	-1.3	0.4	1.2	0.4	1.4	0.2	1.6	0.02	1.9	0.002	1.2	0.2	0.002
Q$1091	P48678	LMNA_MOUSE	Lmna	Prelamin-A/C	1	29.17	17	29429237	24370381	33926676	40720650	4583580	3287500	4216151	5253953	34.8	30.2	27.8	28.9	-1.2	0.7	1.2	0.7	1.4	0.5	1.4	0.4	1.7	0.2	1.2	0.7	0.1
Q$926	P14733	LMNB1_MOUSE	Lmnb1	Lamin-B1	1	29.25	16	29428538	24907069	32120825	41740748	2735054	1216335	1994194	3686964	20.8	10.9	13.9	19.8	-1.2	0.3	1.1	0.4	1.4	0.1	1.3	0.07	1.7	0.01	1.3	0.1	0.002
Q$748	M0QWA7	M0QWA7_MOUSE	Itgb2	Integrin beta	1	53.33	19	29284682	22412355	34194766	36120765	3349105	1310736	1282099	2574267	25.6	13.1	8.4	15.9	-1.3	0.3	1.2	0.4	1.2	0.4	1.5	0.001	1.6	0.007	1.1	0.5	0.003
Q$1186	P62301	RS13_MOUSE	Rps13	40S ribosomal protein S13	1	31.79	5	29180389	23844801	31513407	41113710	3447050	1198170	2051913	2157147	26.4	11.2	14.6	11.7	-1.2	0.3	1.1	0.6	1.4	0.06	1.3	0.06	1.7	0.0007	1.3	0.06	0.0008
Q$968	P20108	PRDX3_MOUSE	Prdx3	Thioredoxin-dependent peroxide reductase, mitochondrial	1	33.46	10	29151004	21043809	34454342	38962288	5519795	2974389	3327946	3809496	42.3	31.6	21.6	21.9	-1.4	0.6	1.2	0.6	1.3	0.6	1.6	0.08	1.9	0.04	1.1	0.6	0.04
Q$1022	P30681	HMGB2_MOUSE	Hmgb2	High mobility group protein B2	1	27.14	8	28877081	21439739	33149774	44997141	3867671	1700546	1860102	2958116	29.9	17.7	12.5	14.7	-1.3	0.2	1.1	0.3	1.6	0.04	1.5	0.008	2.1	0.0007	1.4	0.04	0.0002
Q$1596	Q8BH04	PCKGM_MOUSE	Pck2	Phosphoenolpyruvate carboxykinase [GTP], mitochondrial	1	38.13	17	28758927	25379663	30360604	35898659	1974380	839174	2138534	1866843	15.4	7.4	15.8	11.6	-1.1	0.3	1.1	0.6	1.2	0.1	1.2	0.2	1.4	0.005	1.2	0.2	0.006
Q$1491	Q62465	VAT1_MOUSE	Vat1	Synaptic vesicle membrane protein VAT-1 homolog	1	27.34	9	28751963	16908766	31108757	40975692	4452535	1393101	1433361	3163617	34.6	18.4	10.3	17.3	-1.7	0.2	1.1	0.6	1.4	0.2	1.8	0.0006	2.4	0.0006	1.3	0.08	0.0003
Q$1052	P36423	THAS_MOUSE	Tbxas1	Thromboxane-A synthase	1	6.57	3	28426338	26203775	28214824	29376110	834378	864896	1416370	853675	6.6	7.4	11.2	6.5	-1.1	0.4	-1	0.9	1	0.8	1.1	0.7	1.1	0.2	1	0.8	0.2
Q$1317	Q02819	NUCB1_MOUSE	Nucb1	Nucleobindin-1	1	26.14	10	28352379	19728927	33981256	44201594	4634243	2569835	2979335	4079370	36.5	29.1	19.6	20.6	-1.4	0.3	1.2	0.3	1.6	0.1	1.7	0.03	2.2	0.006	1.3	0.2	0.002
Q$1384	Q3UP87	ELNE_MOUSE	Elane	Neutrophil elastase	1	34.34	10	28206366	22346963	28959364	31901776	4758139	2181308	2957550	2320672	37.7	21.8	22.8	16.3	-1.3	0.8	1	0.9	1.1	0.8	1.3	0.4	1.4	0.1	1.1	0.8	0.2
Q$630	F8WI35	F8WI35_MOUSE	H3f3a	Histone H3	1	11.85	2	28119933	28786950	25982017	48601183	3583070	3555484	2418107	16832108	28.5	27.6	20.8	77.4	1	0.9	-1.1	0.9	1.7	0.8	-1.1	0.9	1.7	0.8	1.9	0.8	0.3
Q$1302	P97855	G3BP1_MOUSE	G3bp1	Ras GTPase-activating protein-binding protein 1	1	30.11	11	27846013	19865896	27252040	36354191	4613977	1605465	1740473	2767802	37.1	18.1	14.3	17	-1.4	0.4	-1	0.9	1.3	0.4	1.4	0.07	1.8	0.005	1.3	0.09	0.01
Q$1564	Q7TMM9	TBB2A_MOUSE	Tubb2a	Tubulin beta-2A chain	1	18.2	7	27731143	19638143	30892100	44649454	4893766	1973206	2079558	2826152	39.5	22.5	15.1	14.2	-1.4	0.3	1.1	0.6	1.6	0.05	1.6	0.02	2.3	0.0005	1.4	0.02	0.0004
Q$1423	Q60864	STIP1_MOUSE	Stip1	Stress-induced-phosphoprotein 1	1	28.36	12	27670388	19651016	29105405	36831009	4512627	1880540	2420252	2783295	36.5	21.4	18.6	16.9	-1.4	0.3	1.1	0.8	1.3	0.3	1.5	0.07	1.9	0.005	1.3	0.3	0.01
Q$1010	P28798	GRN_MOUSE	Grn	Granulins	1	16.98	6	27652306	16646073	34971009	43682194	5583588	2305169	3180226	2411064	45.2	31	20.3	12.3	-1.7	0.2	1.3	0.3	1.6	0.1	2.1	0.008	2.6	0.0002	1.2	0.2	0.0006
Q$2024	Q9JKR6	HYOU1_MOUSE	Hyou1	Hypoxia up-regulated protein 1	1	27.13	20	27635561	21801063	28965761	32955700	6603356	3378290	3421118	2766780	53.4	34.7	26.4	18.8	-1.3	0.9	1	0.9	1.2	0.9	1.3	0.6	1.5	0.2	1.1	0.9	0.4
Q$1331	Q07797	LG3BP_MOUSE	Lgals3bp	Galectin-3-binding protein	1	17.33	6	27302495	25251857	25242227	32063778	2552353	3321274	5332255	8763329	20.9	29.4	47.2	61.1	-1.1	1	-1.1	1	1.2	1	-1	1	1.3	1	1.3	1	0.8
Q$1468	Q61878	PRG2_MOUSE	Prg2	Bone marrow proteoglycan	1	39.01	7	27029612	28361520	22013960	28079035	2800856	2025839	2021029	3757476	23.2	16	20.5	29.9	1	1	-1.2	0.6	1	1	-1.3	0.3	-1	1	1.3	0.6	0.4
Q$977	P22437	PGH1_MOUSE	Ptgs1	Prostaglandin G/H synthase 1	1	16.78	7	27010326	19540242	31303586	39830871	4521285	2379445	2394871	2487460	37.4	27.2	17.1	14	-1.4	0.3	1.2	0.4	1.5	0.1	1.6	0.04	2	0.002	1.3	0.1	0.002
Q$1003	P27005	S10A8_MOUSE	S100a8	Protein S100-A8	1	82.02	7	26746543	15825588	28473920	32030443	4797425	1616020	3177036	2587594	40.1	22.8	24.9	18.1	-1.7	0.2	1.1	0.8	1.2	0.7	1.8	0.04	2	0.004	1.1	0.7	0.02
Q$793	O54734	OST48_MOUSE	Ddost	Dolichyl-diphosphooligosaccharide--protein glycosyltransferase 48 kDa subunit	1	36.05	11	26642398	24023540	26302384	27119073	1895311	2085164	1722926	2117907	15.9	19.4	14.6	17.5	-1.1	0.9	-1	1	1	1	1.1	0.9	1.1	0.9	1	1	0.7
Q$1268	P80314	TCPB_MOUSE	Cct2	T-complex protein 1 subunit beta	1	47.66	19	26635678	19153275	41927692	47005708	4111367	2137955	11982378	8645424	34.5	25	63.9	41.1	-1.4	0.4	1.6	0.5	1.8	0.3	2.2	0.4	2.5	0.2	1.1	0.7	0.07
Q$260	P56542	DNS2A_MOUSE	Dnase2	Deoxyribonuclease-2-alpha	0.9924	9.35	2	26613480	25984395	24008070	30460000	2361371	1398858	1047704	2429592	19.8	12	9.8	17.8	-1	0.8	-1.1	0.7	1.1	0.7	-1.1	0.7	1.2	0.6	1.3	0.2	0.2
Q$141	B7FAV1	B7FAV1_MOUSE	Flna	Filamin, alpha (Fragment)	1	27.76	44	26603501	21206938	30511784	37637436	4030972	2142241	2203045	2560692	33.9	22.6	16.1	15.2	-1.3	0.5	1.1	0.5	1.4	0.2	1.4	0.08	1.8	0.007	1.2	0.2	0.006
Q$604	P62270	RS18_MOUSE	Rps18	40S ribosomal protein S18	1	44.74	10	26296271	22419987	27298033	41203026	2962001	1996565	1348677	11233243	25.2	19.9	11	61	-1.2	0.7	1	0.8	1.6	0.7	1.2	0.4	1.8	0.6	1.5	0.7	0.2
Q$1157	P60867	RS20_MOUSE	Rps20	40S ribosomal protein S20	1	28.57	5	25978436	21417493	33978845	42838774	3258320	1941180	3918553	3396439	28	20.3	25.8	17.7	-1.2	0.3	1.3	0.3	1.6	0.04	1.6	0.08	2	0.004	1.3	0.3	0.001
Q$685	G3XA10	G3XA10_MOUSE	Hnrnpu	Heterogeneous nuclear ribonucleoprotein U	1	31.4	20	25924151	22744231	27192279	33467041	2607311	1281262	1635913	1620190	22.5	12.6	13.5	10.8	-1.1	0.5	1	0.7	1.3	0.1	1.2	0.2	1.5	0.005	1.2	0.1	0.007
Q$694	Q8R081	HNRPL_MOUSE	Hnrnpl	Heterogeneous nuclear ribonucleoprotein L	1	59.56	19	25751204	20388762	29297708	33008551	3625378	2325577	2638837	2479598	31.5	25.5	20.1	16.8	-1.3	0.6	1.1	0.6	1.3	0.4	1.4	0.2	1.6	0.04	1.1	0.6	0.04
Q$1723	Q8VDW0	DX39A_MOUSE	Ddx39a	ATP-dependent RNA helicase DDX39A	1	43.56	14	25515200	18909827	29419071	42457219	4429802	2073513	2132765	3216619	38.8	24.5	16.2	16.9	-1.3	0.4	1.2	0.5	1.7	0.04	1.6	0.04	2.2	0.002	1.4	0.04	0.0006
Q$1443	Q61171	PRDX2_MOUSE	Prdx2	Peroxiredoxin-2	1	44.44	10	25418479	21586923	31094843	36227602	1693405	2064560	1223663	2206733	14.9	21.4	8.8	13.6	-1.2	0.2	1.2	0.08	1.4	0.02	1.4	0.02	1.7	0.008	1.2	0.1	0.0002
Q$2059	Q9R1J0	NSDHL_MOUSE	Nsdhl	Sterol-4-alpha-carboxylate 3-dehydrogenase, decarboxylating	1	17.4	5	25267044	23059071	20153552	21730595	2181128	969401	1511626	1074382	19.3	9.4	16.8	11.1	-1.1	0.8	-1.3	0.4	-1.2	0.6	-1.1	0.5	-1.1	0.8	1.1	0.8	0.1
Q$904	P11438	LAMP1_MOUSE	Lamp1	Lysosome-associated membrane glycoprotein 1	1	8.37	3	25175663	15985034	25626959	37460344	5094661	1877291	2168678	2782915	45.3	26.3	18.9	16.6	-1.6	0.2	1	0.9	1.5	0.2	1.6	0.05	2.3	0.001	1.5	0.05	0.003
Q$1953	Q9D8E6	RL4_MOUSE	Rpl4	60S ribosomal protein L4	1	36.04	17	25009653	19606075	27865690	35391306	3983790	3081252	3432698	3358664	35.6	35.1	27.5	21.2	-1.3	0.5	1.1	0.6	1.4	0.3	1.4	0.4	1.8	0.05	1.3	0.4	0.04
Q$664	G3UYU0	G3UYU0_MOUSE	Mex3a	Protein Mex3a	0.9772	6.92	1	24734500	23623500	22153600	22739800	1166589	577905	295282	1329384	10.5	5.5	3	13.1	-1	0.8	-1.1	0.4	-1.1	0.7	-1.1	0.3	-1	0.8	1	0.8	0.3
Q$992	P26040	EZRI_MOUSE	Ezr	Ezrin	1	32.42	15	24713477	17811807	29623187	35163304	4315070	2063701	2311968	2799630	39	25.9	17.5	17.8	-1.4	0.4	1.2	0.4	1.4	0.3	1.7	0.03	2	0.006	1.2	0.4	0.006
Q$1557	Q78PY7	SND1_MOUSE	Snd1	Staphylococcal nuclease domain-containing protein 1	1	33.19	21	24570137	20879441	28208076	34624103	2667285	1030323	1709270	1772597	24.3	11	13.5	11.4	-1.2	0.4	1.1	0.4	1.4	0.05	1.4	0.03	1.7	0.0009	1.2	0.09	0.0007
Q$1780	Q99JI6	RAP1B_MOUSE	Rap1b	Ras-related protein Rap-1b	1	76.09	16	24487199	19386817	26698169	32820187	2730871	1411806	1309056	3691227	24.9	16.3	11	25.1	-1.3	0.4	1.1	0.5	1.3	0.4	1.4	0.03	1.7	0.05	1.2	0.4	0.01
Q$2117	S4R1N6	S4R1N6_MOUSE	Rps18	40S ribosomal protein S18	1	52.34	8	24276758	20169077	25246968	27270977	2680183	1220022	1243284	1602436	24.7	13.5	11	13.1	-1.2	0.6	1	0.8	1.1	0.7	1.3	0.09	1.4	0.05	1.1	0.7	0.07
Q$2095	Q9Z183	PADI4_MOUSE	Padi4	Protein-arginine deiminase type-4	1	19.97	7	24266487	20955705	24414951	25917268	1178000	1064216	700102	2604833	10.9	11.4	6.4	22.5	-1.2	0.3	1	0.9	1.1	0.9	1.2	0.1	1.2	0.4	1.1	0.9	0.2
Q$978	Q8R1M2	H2AJ_MOUSE	H2afj	Histone H2A.J	1	51.16	9	24237929	23105042	22296126	37122820	4041891	4113736	3579220	13592152	37.3	39.8	35.9	81.9	-1	1	-1.1	1	1.5	0.9	-1	1	1.6	0.9	1.7	0.9	0.5
Q$1878	Q9CWJ9	PUR9_MOUSE	Atic	Bifunctional purine biosynthesis protein PURH	1	45.27	16	24194852	17882996	26995919	31910946	3709662	1520558	2621885	1661812	34.3	19	21.7	11.6	-1.4	0.4	1.1	0.6	1.3	0.3	1.5	0.08	1.8	0.002	1.2	0.4	0.01
Q$1735	Q91VD9	NDUS1_MOUSE	Ndufs1	NADH-ubiquinone oxidoreductase 75 kDa subunit, mitochondrial	1	30.81	15	24021321	18038886	26139472	32539711	3723161	2408716	3067683	3174105	34.7	29.9	26.2	21.8	-1.3	0.5	1.1	0.7	1.4	0.4	1.4	0.3	1.8	0.04	1.2	0.5	0.04
Q$1824	Q99PT1	GDIR1_MOUSE	Arhgdia	Rho GDP-dissociation inhibitor 1	1	29.9	6	23932612	14031804	28952766	36857705	4811122	2140194	2646372	2708539	45	34.1	20.4	16.4	-1.7	0.2	1.2	0.4	1.5	0.2	2.1	0.01	2.6	0.001	1.3	0.2	0.001
Q$1201	P62814	VATB2_MOUSE	Atp6v1b2	V-type proton ATPase subunit B, brain isoform	1	66.73	24	23899163	18137463	26137003	32640702	4279550	2081634	2392716	2156537	40	25.7	20.5	14.8	-1.3	0.5	1.1	0.7	1.4	0.3	1.4	0.2	1.8	0.008	1.2	0.3	0.02
Q$817	O88456	CPNS1_MOUSE	Capns1	Calpain small subunit 1	1	36.06	5	23713523	20831199	25869980	39420299	2774885	4055535	2765196	9741509	26.2	43.5	23.9	55.3	-1.1	0.8	1.1	0.8	1.7	0.6	1.2	0.7	1.9	0.5	1.5	0.7	0.1
Q$1786	Q99K48	NONO_MOUSE	Nono	Non-POU domain-containing octamer-binding protein	1	32.56	11	23650216	20160802	27723127	30756216	3296244	2101364	3385613	2418475	31.2	23.3	27.3	17.6	-1.2	0.8	1.2	0.8	1.3	0.4	1.4	0.4	1.5	0.06	1.1	0.8	0.09
Q$794	O54890	ITB3_MOUSE	Itgb3	Integrin beta-3	1	23	14	23509665	19197550	25796577	26975849	3129669	2122528	1825162	1598414	29.8	24.7	15.8	13.2	-1.2	0.7	1.1	0.8	1.1	0.7	1.3	0.2	1.4	0.1	1	0.8	0.1
Q$1163	P61161	ARP2_MOUSE	Actr2	Actin-related protein 2	1	45.43	13	23468273	19155319	24548940	30682230	3689655	1856132	2316779	2369137	35.2	21.7	21.1	17.3	-1.2	0.5	1	0.8	1.3	0.4	1.3	0.4	1.6	0.03	1.2	0.4	0.05
Q$1979	Q9DCC5	Q9DCC5_MOUSE	Cbx3	Cbx3 protein	1	46.99	10	23467758	19763368	24405125	29221346	2752485	1816931	1881603	2221803	26.2	20.6	17.2	17	-1.2	0.5	1	0.8	1.2	0.5	1.2	0.5	1.5	0.06	1.2	0.5	0.05
Q$1269	P80316	TCPE_MOUSE	Cct5	T-complex protein 1 subunit epsilon	1	42.88	13	23435733	18994467	26675599	32734125	2509953	1342582	1110303	1767340	23.9	15.8	9.3	12.1	-1.2	0.3	1.1	0.3	1.4	0.06	1.4	0.01	1.7	0.002	1.2	0.06	0.0004
Q$1012	P29341	PABP1_MOUSE	Pabpc1	Polyadenylate-binding protein 1	1	29.56	18	23280457	19215747	24957550	34697040	3310695	2468810	2505200	4030493	31.8	28.7	22.4	26	-1.2	0.6	1.1	0.7	1.5	0.3	1.3	0.4	1.8	0.07	1.4	0.3	0.02
Q$1073	P45952	ACADM_MOUSE	Acadm	Medium-chain specific acyl-CoA dehydrogenase, mitochondrial	1	23.75	7	23262095	16493099	24534894	68408336	5495166	1478581	2427298	31506091	52.8	20	22.1	103	-1.4	0.6	1.1	0.8	2.9	0.6	1.5	0.1	4.1	0.6	2.8	0.6	0.1
Q$919	P14131	RS16_MOUSE	Rps16	40S ribosomal protein S16	1	42.47	8	23223142	18057625	28091921	35339219	4432011	2289558	3313667	2096640	42.7	28.4	26.4	13.3	-1.3	0.6	1.2	0.6	1.5	0.2	1.6	0.2	2	0.003	1.3	0.3	0.009
Q$1965	Q9DB77	QCR2_MOUSE	Uqcrc2	Cytochrome b-c1 complex subunit 2, mitochondrial	1	45.7	13	23138161	18727895	22808031	25517523	4688557	2517296	3354505	1962333	45.3	30.1	32.9	17.2	-1.2	0.9	-1	1	1.1	0.9	1.2	0.9	1.4	0.3	1.1	0.9	0.5
Q$3	A2A4Q0	A2A4Q0_MOUSE	Rpl27	60S ribosomal protein L27 (Fragment)	1	10.34	1	23107050	21131050	21127650	23759400	1902730	1284423	1112425	1737865	18.4	13.6	11.8	16.4	-1.1	0.9	-1.1	0.9	1	1	-1	1	1.1	0.8	1.1	0.8	0.5
Q$1702	Q8R2S8	CD177_MOUSE	Cd177	CD177 antigen	1	28.27	14	23089062	19320828	21582109	29528817	3715508	1144208	1966637	3135660	36	13.2	20.4	23.7	-1.2	0.7	-1.1	0.7	1.3	0.6	1.1	0.7	1.5	0.09	1.4	0.3	0.08
Q$1076	P46460	NSF_MOUSE	Nsf	Vesicle-fusing ATPase	1	18.55	8	22955680	19611213	23538099	23586140	2245682	1315505	1791134	1716650	21.9	15	17	16.3	-1.2	0.7	1	1	1	1	1.2	0.5	1.2	0.5	1	1	0.4
Q$1381	Q3UJQ9	Q3UJQ9_MOUSE	Oxct1	Succinyl-CoA:3-ketoacid-coenzyme A transferase	1	27.37	8	22868366	19807324	24510086	24205531	2695874	2160390	1736676	2456738	26.4	24.4	15.8	22.7	-1.2	0.9	1.1	0.9	1.1	0.9	1.2	0.6	1.2	0.7	-1	0.9	0.5
Q$1796	Q99KP6	PRP19_MOUSE	Prpf19	Pre-mRNA-processing factor 19	1	37.3	10	22647024	16282723	24467664	49125092	4574563	2113728	1921196	14302628	45.2	29	17.6	65.1	-1.4	0.5	1.1	0.7	2.2	0.5	1.5	0.1	3	0.4	2	0.5	0.04
Q$552	E9QAZ2	E9QAZ2_MOUSE	Gm10020	Ribosomal protein L15	1	27.45	6	22576384	19169341	23142517	29438503	2936534	1662515	2225247	1844273	29.1	19.4	21.5	14	-1.2	0.6	1	0.9	1.3	0.3	1.2	0.5	1.5	0.02	1.3	0.3	0.03
Q$1178	P62196	PRS8_MOUSE	Psmc5	26S protease regulatory subunit 8	1	20.94	5	22392857	19987847	21957915	23418834	2113810	736813	773593	2183848	21.1	8.2	7.9	20.9	-1.1	0.8	-1	0.9	1	0.9	1.1	0.5	1.2	0.6	1.1	0.9	0.5
Q$1525	Q6NXH9	K2C73_MOUSE	Krt73	Keratin, type II cytoskeletal 73	1	2.04	1	22345467	20746667	19975967	21936233	820623	855661	795738	900927	8.2	9.2	8.9	9.2	-1.1	0.6	-1.1	0.4	-1	0.8	-1	0.8	1.1	0.7	1.1	0.5	0.2
Q$806	O70251	EF1B_MOUSE	Eef1b	Elongation factor 1-beta	1	58.67	8	22194483	15931523	25125435	35250415	4694241	2243347	2869323	4799679	47.3	31.5	25.5	30.4	-1.4	0.5	1.1	0.6	1.6	0.3	1.6	0.2	2.2	0.04	1.4	0.3	0.02
Q$918	P14115	RL27A_MOUSE	Rpl27a	60S ribosomal protein L27a	1	29.05	5	22182693	17951727	24170303	30974370	2652957	1452766	2302799	1576375	26.7	18.1	21.3	11.4	-1.2	0.4	1.1	0.6	1.4	0.1	1.3	0.2	1.7	0.002	1.3	0.2	0.003
Q$756	O08709	PRDX6_MOUSE	Prdx6	Peroxiredoxin-6	1	80.36	16	22060093	14459419	23695050	29854418	4032677	1502375	1477033	1514393	40.9	23.2	13.9	11.3	-1.5	0.3	1.1	0.7	1.4	0.3	1.6	0.01	2.1	0.0005	1.3	0.08	0.003
Q$1088	P47962	RL5_MOUSE	Rpl5	60S ribosomal protein L5	1	29.97	11	21985156	16408386	26719162	33072218	3249647	1743984	1888876	2406285	33.1	23.8	15.8	16.3	-1.3	0.3	1.2	0.3	1.5	0.1	1.6	0.02	2	0.003	1.2	0.2	0.001
Q$869	P08030	APT_MOUSE	Aprt	Adenine phosphoribosyltransferase	1	55.56	6	21934752	18870935	20089610	22157284	2329928	1697214	1481175	1846491	23.8	20.1	16.5	18.6	-1.2	0.9	-1.1	0.9	1	0.9	1.1	0.9	1.2	0.8	1.1	0.9	0.6
Q$1680	Q8K1K2	Q8K1K2_MOUSE	Psmc5	26S protease regulatory subunit 8	1	20.11	4	21922992	19590006	21488451	22885518	2138936	724767	765842	2140553	21.8	8.3	8	20.9	-1.1	0.8	-1	0.9	1	0.9	1.1	0.5	1.2	0.6	1.1	0.9	0.5
Q$1446	Q61206	PA1B2_MOUSE	Pafah1b2	Platelet-activating factor acetylhydrolase IB subunit beta	0.9674	3.93	1	21690600	20335900	15573170	16839700	2252533	1654186	1857379	1631883	23.2	18.2	26.7	21.7	-1.1	0.9	-1.4	0.4	-1.3	0.4	-1.3	0.4	-1.2	0.4	1.1	0.9	0.1
Q$635	F8WIX8	F8WIX8_MOUSE	Hist1h2al	Histone H2A	1	49.6	6	21590760	21547695	19732045	32031338	2995717	2763634	2470055	10079634	31	28.7	28	70.4	-1	1	-1.1	1	1.5	0.9	-1.1	1	1.5	0.9	1.6	0.9	0.4
Q$2093	Q9Z126	PLF4_MOUSE	Pf4	Platelet factor 4	1	38.1	4	21383406	16845236	23515585	23225014	3738565	3275445	2445983	2444421	39.1	43.5	23.3	23.5	-1.3	0.9	1.1	1	1.1	1	1.4	0.6	1.4	0.6	-1	1	0.4
Q$821	O88569-2	ROA2_MOUSE	Hnrnpa2b	Isoform 2 of Heterogeneous nuclear ribonucleoproteins A2/B1	1	43.11	19	21297803	16468987	26392026	35068016	3447752	2195132	1726639	2558182	36.2	29.8	14.6	16.3	-1.3	0.4	1.2	0.4	1.6	0.05	1.6	0.04	2.1	0.003	1.3	0.07	0.0007
Q$1807	Q99LC5	ETFA_MOUSE	Etfa	Electron transfer flavoprotein subunit alpha, mitochondrial	1	42.94	10	21271404	17777564	22801796	25827388	2845611	2175088	2226045	1807367	29.9	27.4	21.8	15.6	-1.2	0.7	1.1	0.7	1.2	0.6	1.3	0.5	1.5	0.1	1.1	0.7	0.1
Q$803	O70145	NCF2_MOUSE	Ncf2	Neutrophil cytosol factor 2	1	11.62	5	21259054	18922389	20265695	25244880	1548579	466681	336021	2104090	16.3	5.5	3.7	18.6	-1.1	0.4	-1	0.6	1.2	0.4	1.1	0.2	1.3	0.2	1.2	0.3	0.02
Q$755	O08692	O08692_MOUSE	Ngp	Myeloid bactenecin (F1)	1	35.33	6	21250601	16492733	19654201	22571813	2448277	1111663	1269001	1982844	25.8	15.1	14.4	19.6	-1.3	0.4	-1.1	0.8	1.1	0.8	1.2	0.4	1.4	0.2	1.1	0.6	0.1
Q$1761	Q921M3-2	SF3B3_MOUSE	Sf3b	Isoform 2 of Splicing factor 3B subunit 3	1	9.71	7	21175832	18522927	20627247	21356884	2582489	1719443	921621	1321505	27.3	20.8	10	13.8	-1.1	0.9	-1	1	1	1	1.1	0.8	1.2	0.8	1	1	0.7
Q$1959	Q9D964	GATM_MOUSE	Gatm	Glycine amidinotransferase, mitochondrial	1	34.28	12	21152048	14273319	22668172	29203352	3915059	1950214	1812073	2158412	41.4	30.6	17.9	16.5	-1.5	0.3	1.1	0.7	1.4	0.3	1.6	0.07	2	0.005	1.3	0.2	0.008
Q$1555	Q76MZ3	2AAA_MOUSE	Ppp2r1a	Serine/threonine-protein phosphatase 2A 65 kDa regulatory subunit A alpha isoform	1	27.33	13	20991834	16952676	21864048	25070975	1229563	407076	656681	957436	13.1	5.4	6.7	8.5	-1.2	0.06	1	0.5	1.2	0.07	1.3	0.001	1.5	0.0003	1.1	0.07	7e-05
Q$2079	Q9WUU7	CATZ_MOUSE	Ctsz	Cathepsin Z	1	39.87	7	20910810	12954083	22837285	31008832	4613801	1722923	2299689	3365256	49.3	29.7	22.5	24.3	-1.6	0.3	1.1	0.7	1.5	0.3	1.8	0.04	2.4	0.008	1.4	0.3	0.009
Q$1662	Q8CGK3	LONM_MOUSE	Lonp1	Lon protease homolog, mitochondrial	1	26.87	13	20817954	17851085	22809950	27635262	2946477	1889319	1839654	1629887	31.6	23.7	18	13.2	-1.2	0.7	1.1	0.7	1.3	0.3	1.3	0.3	1.5	0.03	1.2	0.3	0.03
Q$159	P14206	RSSA_MOUSE	Rpsa	40S ribosomal protein SA	1	34.92	10	20693776	14943212	24634386	31813629	3018370	1615191	1961461	2236523	32.6	24.2	17.8	15.7	-1.4	0.2	1.2	0.3	1.5	0.07	1.6	0.03	2.1	0.002	1.3	0.1	0.0007
Q$1307	P99029-2	PRDX5_MOUSE	Prdx	Isoform Cytoplasmic+peroxisomal of Peroxiredoxin-5, mitochondrial	1	73.46	16	20618219	14417786	21861306	23852439	2950404	793679	931421	1628197	32	12.3	9.5	15.3	-1.4	0.4	1.1	0.7	1.2	0.7	1.5	0.002	1.7	0.004	1.1	0.7	0.01
Q$1368	Q3U9G9	LBR_MOUSE	Lbr	Lamin-B receptor	1	12.3	9	20420223	17581465	22607167	26767395	2293176	2260766	1963354	2722714	25.1	28.8	19.4	22.7	-1.2	0.6	1.1	0.6	1.3	0.4	1.3	0.4	1.5	0.2	1.2	0.6	0.08
Q$1198	P62754	RS6_MOUSE	Rps6	40S ribosomal protein S6	1	19.28	6	20249520	15077365	23713409	30291488	4029504	2056565	2828486	1910335	44.5	30.5	26.7	14.1	-1.3	0.5	1.2	0.5	1.5	0.2	1.6	0.2	2	0.004	1.3	0.2	0.01
Q$1569	Q80TA9	EPG5_MOUSE	Epg5	Ectopic P granules protein 5 homolog	0.9076	0.7	1	20133400	17446200	18084800	20813700	840402	528840	903436	916447	9.3	6.8	11.2	9.8	-1.2	0.1	-1.1	0.4	1	0.8	1	0.8	1.2	0.08	1.2	0.2	0.03
Q$1781	Q99JR1	SFXN1_MOUSE	Sfxn1	Sideroflexin-1	1	53.42	15	20017478	16926490	20117710	23610192	2109663	1936419	1121382	2736183	23.6	25.6	12.5	25.9	-1.2	0.7	1	1	1.2	0.7	1.2	0.7	1.4	0.4	1.2	0.7	0.2
Q$1809	Q99LP6	GRPE1_MOUSE	Grpel1	GrpE protein homolog 1, mitochondrial	1	35.94	8	19953624	14711492	21739428	28092886	3371242	1501893	2342824	1834510	37.8	22.8	24.1	14.6	-1.4	0.3	1.1	0.7	1.4	0.2	1.5	0.2	1.9	0.003	1.3	0.2	0.009
Q$1906	Q9D051	ODPB_MOUSE	Pdhb	Pyruvate dehydrogenase E1 component subunit beta, mitochondrial	1	32.31	8	19909919	15272832	21112090	25226447	2794233	1615280	2256424	1897508	31.4	23.6	23.9	16.8	-1.3	0.5	1.1	0.7	1.3	0.5	1.4	0.3	1.7	0.02	1.2	0.5	0.04
Q$836	P00920	CAH2_MOUSE	Ca2	Carbonic anhydrase 2	1	67.69	9	19881782	14489949	23019962	27022824	4233548	2298849	3443226	3232244	47.6	35.5	33.4	26.7	-1.4	0.7	1.2	0.7	1.4	0.6	1.6	0.3	1.9	0.08	1.2	0.7	0.1
Q$1814	Q99M74	KRT82_MOUSE	Krt82	Keratin, type II cuticular Hb2	1	10.66	5	19752755	15693426	16904544	134589061	3531666	7731626	713799	95000010	40	110.2	9.4	157.8	-1.3	0.9	-1.2	0.9	6.8	0.9	1.1	0.9	8.6	0.9	8	0.9	0.3
Q$1373	Q9ET01	PYGL_MOUSE	Pygl	Glycogen phosphorylase, liver form	1	17.18	12	19730770	16090051	20773342	23449974	3252021	2277913	3278364	3156749	36.9	31.7	35.3	30.1	-1.2	0.9	1.1	0.9	1.2	0.9	1.3	0.8	1.5	0.5	1.1	0.9	0.4
Q$1652	Q8C872	Q8C872_MOUSE	Tfrc	Transferrin receptor protein 1	1	24.47	10	19705127	18841127	18797300	22339654	1587620	1779791	921220	1371667	18	21.1	11	13.7	-1	1	-1	1	1.1	0.7	-1	1	1.2	0.6	1.2	0.3	0.3
Q$681	Q9DCX2	ATP5H_MOUSE	Atp5h	ATP synthase subunit d, mitochondrial	1	77.02	14	19646096	16829496	20751991	24205882	2722400	2216055	2190299	2142408	31	29.4	23.6	19.8	-1.2	0.7	1.1	0.8	1.2	0.7	1.2	0.7	1.4	0.2	1.2	0.7	0.2
Q$921	P14152	MDHC_MOUSE	Mdh1	Malate dehydrogenase, cytoplasmic	1	23.05	6	19623128	15857230	22075028	22519887	1136256	430294	1264380	1884350	12.9	6.1	12.8	18.7	-1.2	0.07	1.1	0.5	1.1	0.5	1.4	0.01	1.4	0.09	1	0.8	0.008
Q$1999	Q9ERI2	RB27A_MOUSE	Rab27a	Ras-related protein Rab-27A	1	10.86	2	19600010	17158180	18812600	20921810	1285257	970299	932472	1099740	14.7	12.6	11.1	11.8	-1.1	0.6	-1	0.7	1.1	0.7	1.1	0.6	1.2	0.2	1.1	0.6	0.1
Q$2034	Q9QWL7	K1C17_MOUSE	Krt17	Keratin, type I cytoskeletal 17	1	26.79	11	19598982	18538879	24855085	26317655	2888015	4067516	4749083	2202833	32.9	49.1	42.7	18.7	-1.1	1	1.3	0.8	1.3	0.5	1.3	0.8	1.4	0.5	1.1	1	0.4
Q$1551	Q6ZWV7	RL35_MOUSE	Rpl35	60S ribosomal protein L35	0.9989	18.7	3	19566175	9725361	22597643	33255321	2639129	1064709	1050265	3500759	30.2	24.5	10.4	23.5	-2	0.03	1.2	0.3	1.7	0.04	2.3	0.0002	3.4	0.008	1.5	0.07	3e-05
Q$788	O35690	PHX2B_MOUSE	Phox2b	Paired mesoderm homeobox protein 2B	0.9805	20.7	1	19426800	18172400	23302400	17203700	1320487	1640987	1565373	1025781	15.2	20.2	15	13.3	-1.1	0.8	1.2	0.3	-1.1	0.5	1.3	0.2	-1.1	0.8	-1.4	0.07	0.04
Q$110	B1AR09	B1AR09_MOUSE	Mllt6	Protein Mllt6	0.9697	7.6	2	19374516	18796147	17458613	17344730	658047	364482	741319	844735	7.6	4.3	9.5	10.9	-1	0.7	-1.1	0.4	-1.1	0.4	-1.1	0.5	-1.1	0.5	-1	0.9	0.1
Q$1099	P49710	HCLS1_MOUSE	Hcls1	Hematopoietic lineage cell-specific protein	1	17.7	6	19353173	16991433	21240165	26163284	2707615	1648731	2198931	5448018	31.3	21.7	23.1	46.6	-1.1	0.8	1.1	0.8	1.4	0.8	1.3	0.7	1.5	0.7	1.2	0.8	0.3
Q$2016	Q9JII6	AK1A1_MOUSE	Akr1a1	Alcohol dehydrogenase [NADP(+)]	1	39.38	11	19297664	13409026	23543053	29951371	3629727	1389095	1982159	1736946	42.1	23.2	18.8	13	-1.4	0.3	1.2	0.3	1.6	0.1	1.8	0.02	2.2	0.0004	1.3	0.1	0.001
Q$1458	Q8BTS0	Q8BTS0_MOUSE	Ddx5	DEAD (Asp-Glu-Ala-Asp) box polypeptide 5	1	39.67	20	19225427	16210859	21486620	31100740	2928994	2183429	2630439	3064270	34.1	30.1	27.4	22	-1.2	0.7	1.1	0.7	1.6	0.1	1.3	0.4	1.9	0.02	1.4	0.2	0.008
Q$1334	Q14AA6	Q14AA6_MOUSE	1700009N14Rik	MCG49183	1	26.39	6	19203858	14845415	22931276	28828065	3039157	2084123	2966126	2878773	35.4	31.4	28.9	22.3	-1.3	0.5	1.2	0.5	1.5	0.2	1.5	0.2	1.9	0.03	1.3	0.5	0.02
Q$1989	Q9DCW4	ETFB_MOUSE	Etfb	Electron transfer flavoprotein subunit beta	1	65.88	13	19145446	16846379	20249939	20536106	2313052	1523902	2153524	1775469	27	20.2	23.8	19.3	-1.1	0.9	1.1	1	1.1	1	1.2	0.7	1.2	0.6	1	1	0.6
Q$1938	Q9D646	KRT34_MOUSE	Krt34	Keratin, type I cuticular Ha4	1	17.35	6	19107205	17769751	18532900	50406317	988249	2009748	1620171	26179255	11.6	25.3	19.5	116.1	-1.1	0.9	-1	0.9	2.6	0.9	1	0.9	2.8	0.9	2.7	0.9	0.3
Q$1205	P62835	RAP1A_MOUSE	Rap1a	Ras-related protein Rap-1A	1	61.96	9	19100408	14229626	21545104	23168541	2144049	1175919	2116474	2234853	25.1	18.5	22	21.6	-1.3	0.3	1.1	0.7	1.2	0.5	1.5	0.08	1.6	0.04	1.1	0.7	0.03
Q$480	E9PZF0	E9PZF0_MOUSE	Gm20390	Nucleoside diphosphate kinase	1	32.96	8	18983673	12201511	23805953	32042646	2768116	1232033	1827177	2515402	32.6	22.6	17.2	17.6	-1.6	0.1	1.3	0.2	1.7	0.03	2	0.004	2.6	0.0006	1.3	0.09	7e-05
Q$1661	Q8CGC7	SYEP_MOUSE	Eprs	Bifunctional glutamate/proline--tRNA ligase	1	7.21	8	18933426	15493979	19776568	46979539	3406644	3520883	2767993	18977044	40.2	50.8	31.3	90.3	-1.2	0.8	1	0.9	2.5	0.7	1.3	0.7	3	0.7	2.4	0.7	0.1
Q$1360	Q3U0V1	FUBP2_MOUSE	Khsrp	Far upstream element-binding protein 2	1	22.73	11	18875321	15150160	22198313	26335947	3304545	1548392	2241487	2520368	39.1	22.9	22.6	21.4	-1.2	0.6	1.2	0.6	1.4	0.4	1.5	0.2	1.7	0.03	1.2	0.6	0.03
Q$661	G3UY38	G3UY38_MOUSE	Hnrnpl	Heterogeneous nuclear ribonucleoprotein L	1	62.72	15	18713982	13776373	21783105	25111997	2579400	1638623	2111223	2251865	30.8	26.6	21.7	20.1	-1.4	0.4	1.2	0.5	1.3	0.3	1.6	0.08	1.8	0.02	1.2	0.5	0.01
Q$1674	Q8JZU2	Q8JZU2_MOUSE	Slc25a1	Protein Slc25a1	1	24.44	6	18699326	15804994	19453137	21276918	2245410	812639	2020485	1183122	26.9	11.5	23.2	12.4	-1.2	0.7	1	0.8	1.1	0.7	1.2	0.5	1.3	0.03	1.1	0.7	0.2
Q$1826	Q99PV0	PRP8_MOUSE	Prpf8	Pre-mRNA-processing-splicing factor 8	1	8.61	13	18698352	14515278	21432632	29347333	2743737	1649766	1616629	2112965	32.8	25.4	16.9	16.1	-1.3	0.4	1.1	0.4	1.6	0.07	1.5	0.07	2	0.003	1.4	0.07	0.001
Q$1801	Q99L04	DHRS1_MOUSE	Dhrs1	Dehydrogenase/reductase SDR family member 1	1	45.69	9	18685404	14252529	18612560	24998002	3413299	2371094	2879018	5874689	40.8	37.2	34.6	52.5	-1.3	0.8	-1	1	1.3	0.8	1.3	0.8	1.8	0.6	1.3	0.8	0.3
Q$1137	P56391	CX6B1_MOUSE	Cox6b1	Cytochrome c oxidase subunit 6B1	1	53.49	4	18503393	14199462	18512045	21772902	3055557	2832125	1657433	2003877	36.9	44.6	20	20.6	-1.3	0.7	1	1	1.2	0.7	1.3	0.7	1.5	0.3	1.2	0.7	0.2
Q$489	E9Q0F0	E9Q0F0_MOUSE	Krt78	Protein Krt78	1	2.43	4	18382590	26863476	21280184	20386604	6368144	10464790	12818622	5332795	77.5	87.1	134.7	58.5	1.5	1	1.2	1	1.1	1	-1.3	1	-1.3	1	-1	1	0.9
Q$1565	Q7TNV0	DEK_MOUSE	Dek	Protein DEK	1	12.89	4	18233132	16746402	20832084	23792528	2069233	2427151	2177122	1919412	25.4	32.4	23.4	18	-1.1	0.7	1.1	0.7	1.3	0.4	1.2	0.7	1.4	0.3	1.1	0.7	0.1
Q$1208	P62852	RS25_MOUSE	Rps25	40S ribosomal protein S25	1	15.2	2	18049970	15038630	24995240	29837700	2325827	1047464	1279062	1937478	28.8	15.6	11.4	14.5	-1.2	0.3	1.4	0.09	1.7	0.02	1.7	0.002	2	0.0009	1.2	0.1	6e-05
Q$704	H3BJQ7	H3BJQ7_MOUSE	Prdx5	Peroxiredoxin-6	1	47.89	13	18021173	12486478	19310402	21083703	2585407	726423	838659	1535511	32.1	13	9.7	16.3	-1.4	0.3	1.1	0.7	1.2	0.7	1.5	0.002	1.7	0.005	1.1	0.7	0.01
Q$1324	Q05306	COAA1_MOUSE	Col10a1	Collagen alpha-1(X) chain	0.9848	10.44	2	18001092	13934291	23640183	24625610	2814342	2082832	2926215	2549589	35	33.4	27.7	23.2	-1.3	0.5	1.3	0.5	1.4	0.4	1.7	0.1	1.8	0.07	1	0.8	0.03
Q$854	P05063	ALDOC_MOUSE	Aldoc	Fructose-bisphosphate aldolase C	1	27.27	7	17729003	11198338	22361944	25865434	4189055	1868259	2146911	1802966	52.8	37.3	21.5	15.6	-1.6	0.5	1.3	0.5	1.5	0.4	2	0.02	2.3	0.003	1.2	0.5	0.008
Q$1831	Q9CPQ8	ATP5L_MOUSE	Atp5l	ATP synthase subunit g, mitochondrial	1	71.84	6	17564641	15680660	14888133	20010960	2681541	1608194	2118131	3000431	34.1	22.9	31.8	33.5	-1.1	0.9	-1.2	0.9	1.1	0.9	-1.1	0.9	1.3	0.7	1.3	0.7	0.5
Q$2050	Q9QZQ8	H2AY_MOUSE	H2afy	Core histone macro-H2A.1	1	44.35	9	17530737	12884124	19576589	36267608	3505333	1909317	2277074	13424197	44.7	33.1	26	82.8	-1.4	0.7	1.1	0.7	2.1	0.7	1.5	0.3	2.8	0.6	1.9	0.7	0.1
Q$1258	P70349	HINT1_MOUSE	Hint1	Histidine triad nucleotide-binding protein 1	1	35.71	2	17519169	13330179	19555125	23777555	2010484	1140335	1277382	1779348	25.7	19.1	14.6	16.7	-1.3	0.2	1.1	0.4	1.4	0.2	1.5	0.03	1.8	0.007	1.2	0.2	0.002
Q$1232	P63158	HMGB1_MOUSE	Hmgb1	High mobility group protein B1	1	30.23	8	17407468	11665898	22686257	41805127	3126652	1121198	1311474	8210077	40.2	21.5	12.9	43.9	-1.5	0.2	1.3	0.2	2.4	0.1	1.9	0.001	3.6	0.1	1.8	0.2	0.001
Q$857	P05213	TBA1B_MOUSE	Tuba1b	Tubulin alpha-1B chain	1	24.61	9	17406645	13169428	20671642	28300478	2496161	704781	942229	1767704	32.1	12	10.2	14	-1.3	0.3	1.2	0.3	1.6	0.02	1.6	0.001	2.1	0.0003	1.4	0.02	6e-05
Q$801	O55222	ILK_MOUSE	Ilk	Integrin-linked protein kinase	1	15.93	5	17290219	14309385	16606950	18668931	2003111	1067676	831077	983779	25.9	16.7	11.2	11.8	-1.2	0.5	-1	0.8	1.1	0.8	1.2	0.5	1.3	0.1	1.1	0.5	0.2
Q$595	F6XI62	F6XI62_MOUSE	Rpl7	60S ribosomal protein L7 (Fragment)	1	29.03	10	17203223	13244820	19095452	24883187	2097351	1110931	1265813	1800514	27.3	18.8	14.8	16.2	-1.3	0.2	1.1	0.5	1.4	0.09	1.4	0.04	1.9	0.003	1.3	0.09	0.001
Q$1597	Q8BH59	CMC1_MOUSE	Slc25a12	Calcium-binding mitochondrial carrier protein Aralar1	1	27.47	13	17203037	13184004	18980454	22578613	3564442	1488864	1122125	1504651	46.3	25.3	13.2	14.9	-1.3	0.5	1.1	0.7	1.3	0.5	1.4	0.07	1.7	0.01	1.2	0.3	0.05
Q$1051	P35980	RL18_MOUSE	Rpl18	60S ribosomal protein L18	1	25.53	5	17191833	15066306	19927192	26029511	1645494	1544946	1225800	2319816	21.4	22.9	13.8	19.9	-1.1	0.4	1.2	0.4	1.5	0.07	1.3	0.1	1.7	0.03	1.3	0.1	0.002
Q$874	P08228	SODC_MOUSE	Sod1	Superoxide dismutase [Cu-Zn]	1	46.1	7	17179927	9871053	20034113	28272670	3918921	1818064	2369541	2154190	51	41.2	26.4	17	-1.7	0.2	1.2	0.6	1.6	0.1	2	0.05	2.9	0.001	1.4	0.1	0.002
Q$2026	Q9JM76	ARPC3_MOUSE	Arpc3	Actin-related protein 2/3 complex subunit 3	1	17.42	4	17142775	13317194	19975781	23110106	2956707	1594713	1631572	2123733	38.6	26.8	18.3	20.5	-1.3	0.6	1.2	0.6	1.3	0.5	1.5	0.09	1.7	0.04	1.2	0.6	0.03
Q$1065	P42932	TCPQ_MOUSE	Cct8	T-complex protein 1 subunit theta	1	29.93	13	17122280	13615607	18737096	26848235	2899164	1815691	2346968	2931372	37.9	29.8	28	24.4	-1.3	0.6	1.1	0.7	1.6	0.2	1.4	0.3	2	0.03	1.4	0.2	0.01
Q$1855	Q9CQQ7	AT5F1_MOUSE	Atp5f1	ATP synthase F(0) complex subunit B1, mitochondrial	1	20.31	5	17090503	13167488	18216390	23604573	3816296	1599941	2061195	2418111	49.9	27.2	25.3	22.9	-1.3	0.6	1.1	0.8	1.4	0.5	1.4	0.4	1.8	0.04	1.3	0.4	0.08
Q$1486	Q62422	OSTF1_MOUSE	Ostf1	Osteoclast-stimulating factor 1	1	46.51	7	17032681	12362583	17797446	22750780	2709188	1251631	1422475	1728787	35.6	22.6	17.9	17	-1.4	0.3	1	0.8	1.3	0.3	1.4	0.1	1.8	0.007	1.3	0.2	0.01
Q$2081	Q9WV55	VAPA_MOUSE	Vapa	Vesicle-associated membrane protein-associated protein A	1	42.57	8	17017634	15262982	17664178	58868663	2303276	3340534	1103783	25344311	30.3	48.9	14	96.3	-1.1	0.9	1	0.9	3.5	0.7	1.2	0.9	3.9	0.7	3.3	0.7	0.08
Q$880	P09055	ITB1_MOUSE	Itgb1	Integrin beta-1	1	19.67	11	16995511	13308280	18900183	28543533	2418960	1956868	1993918	5329347	31.8	32.9	23.6	41.7	-1.3	0.5	1.1	0.6	1.7	0.3	1.4	0.3	2.1	0.2	1.5	0.3	0.03
Q$1856	Q9CQR2	RS21_MOUSE	Rps21	40S ribosomal protein S21	1	40.96	5	16961259	13523555	20409512	23628742	2402125	1149647	1837444	2082999	31.7	19	20.1	19.7	-1.3	0.5	1.2	0.5	1.4	0.2	1.5	0.06	1.7	0.02	1.2	0.5	0.01
Q$267	P97351	RS3A_MOUSE	Rps3a	40S ribosomal protein S3a	1	43.18	13	16909331	13061948	20265089	26462603	2773410	1428355	1560355	1661594	36.7	24.5	17.2	14	-1.3	0.4	1.2	0.4	1.6	0.07	1.6	0.05	2	0.002	1.3	0.08	0.001
Q$670	G3UZK4	G3UZK4_MOUSE	Rpl18	60S ribosomal protein L18	1	26.47	4	16806941	14760005	19583399	25528999	1600805	1509905	1190581	2318907	21.3	22.9	13.6	20.3	-1.1	0.4	1.2	0.4	1.5	0.07	1.3	0.1	1.7	0.03	1.3	0.1	0.002
Q$2025	Q9JLI2	Q9JLI2_MOUSE	Col5a3	Collagen type V alpha 3 chain	0.9984	3.74	3	16755502	15562135	17191060	20629303	714823	1298510	771909	3531590	9.5	18.7	10	38.3	-1.1	0.8	1	0.8	1.2	0.8	1.1	0.8	1.3	0.8	1.2	0.8	0.3
Q$1213	P62900	RL31_MOUSE	Rpl31	60S ribosomal protein L31	0.9999	16	2	16643490	12055980	22040870	26097690	3303581	1772515	2538706	2178714	44.4	32.9	25.8	18.7	-1.4	0.5	1.3	0.5	1.6	0.2	1.8	0.06	2.2	0.006	1.2	0.5	0.006
Q$28	A2AE89	A2AE89_MOUSE	Gstm1	Glutathione S-transferase Mu 1 (Fragment)	1	48.26	10	16569574	14641177	16310822	17404138	1298534	987043	975884	1063475	17.5	15.1	13.4	13.7	-1.1	0.8	-1	0.9	1.1	0.9	1.1	0.8	1.2	0.4	1.1	0.9	0.4
Q$1731	Q91V41	RAB14_MOUSE	Rab14	Ras-related protein Rab-14	1	45.12	8	16473209	12138776	16897675	23148853	3020707	1292834	1220399	2215711	41	23.8	16.1	21.4	-1.4	0.4	1	0.9	1.4	0.3	1.4	0.1	1.9	0.02	1.4	0.1	0.01
Q$1553	Q6ZWZ6	Q6ZWZ6_MOUSE	Rps12	40S ribosomal protein S12	1	48.48	8	16447566	12808335	18455216	22872959	2619711	1025978	2137444	859870	35.6	17.9	25.9	8.4	-1.3	0.4	1.1	0.6	1.4	0.2	1.4	0.2	1.8	0.0004	1.2	0.3	0.01
Q$1473	Q62029	Q62029_MOUSE	Pabpc2	Poly A binding protein, cytoplasmic 2	1	4.78	1	16437870	11719150	19761700	26035800	2792910	792440	1114685	2285553	38	15.1	12.6	19.6	-1.4	0.3	1.2	0.3	1.6	0.1	1.7	0.002	2.2	0.002	1.3	0.1	0.0007
Q$2062	Q9R1P4	PSA1_MOUSE	Psma1	Proteasome subunit alpha type-1	1	40.68	10	16366652	9931505	16298744	22216430	3941899	1278793	1714648	1857528	53.9	28.8	23.5	18.7	-1.6	0.4	-1	1	1.4	0.4	1.6	0.09	2.2	0.004	1.4	0.2	0.02
Q$1601	Q8BH95	ECHM_MOUSE	Echs1	Enoyl-CoA hydratase, mitochondrial	1	20.34	5	16327168	12300666	26161954	26608002	2272401	1526533	2374967	2298756	31.1	27.7	20.3	19.3	-1.3	0.3	1.6	0.05	1.6	0.05	2.1	0.006	2.2	0.005	1	0.9	0.0003
Q$1021	P30416	FKBP4_MOUSE	Fkbp4	Peptidyl-prolyl cis-trans isomerase FKBP4	1	25.11	8	16320055	13835375	17846573	22062796	2215256	1000848	1382192	1877105	30.4	16.2	17.3	19	-1.2	0.6	1.1	0.6	1.4	0.3	1.3	0.2	1.6	0.03	1.2	0.3	0.02
Q$689	G5E839	G5E839_MOUSE	Cct4	T-complex protein 1 subunit delta	1	39.88	12	16303252	11847319	18591137	23157635	3190224	1990118	2792778	2688484	43.8	37.6	33.6	26	-1.4	0.6	1.1	0.6	1.4	0.5	1.6	0.4	2	0.06	1.2	0.6	0.06
Q$1172	P61982	1433G_MOUSE	Ywhag	14-3-3 protein gamma	1	54.66	12	16217659	11767905	17949370	22401432	2296181	1202126	1153883	1483884	31.7	22.8	14.4	14.8	-1.4	0.2	1.1	0.5	1.4	0.2	1.5	0.03	1.9	0.003	1.2	0.2	0.002
Q$131	P61979-2	HNRPK_MOUSE	Hnrnp	Isoform 2 of Heterogeneous nuclear ribonucleoprotein K	1	43.53	21	15949696	11480575	17699991	22849553	2363541	957268	936710	1561597	33.1	18.6	11.8	15.3	-1.4	0.2	1.1	0.5	1.4	0.1	1.5	0.008	2	0.002	1.3	0.09	0.001
Q$48	Q8BG05-2	ROA3_MOUSE	Hnrnpa	Isoform 2 of Heterogeneous nuclear ribonucleoprotein A3	1	36.69	20	15880053	12243857	18694858	22572274	2372323	1317311	1400559	1722853	33.4	24.1	16.8	17.1	-1.3	0.4	1.2	0.4	1.4	0.2	1.5	0.05	1.8	0.009	1.2	0.3	0.005
Q$752	O08553	DPYL2_MOUSE	Dpysl2	Dihydropyrimidinase-related protein 2	1	31.82	12	15786711	12150828	18837863	22622597	1911619	1005666	1053278	1492671	27.1	18.5	12.5	14.8	-1.3	0.2	1.2	0.2	1.4	0.09	1.6	0.009	1.9	0.002	1.2	0.2	0.0006
Q$1572	Q80UU9	PGRC2_MOUSE	Pgrmc2	Membrane-associated progesterone receptor component 2	1	21.66	3	15780709	13096380	15348732	17161354	1338847	688357	770673	1346642	19	11.8	11.2	17.5	-1.2	0.4	-1	0.8	1.1	0.7	1.2	0.3	1.3	0.2	1.1	0.6	0.1
Q$1721	Q8VDN2	AT1A1_MOUSE	Atp1a1	Sodium/potassium-transporting ATPase subunit alpha-1	1	12.51	9	15747607	15609422	15573349	17872454	2070984	2785544	1446276	2188087	29.4	39.9	20.8	27.4	-1	1	-1	1	1.1	1	-1	1	1.1	1	1.1	1	0.9
Q$1183	P62264	RS14_MOUSE	Rps14	40S ribosomal protein S14	1	26.49	5	15611727	11057890	18773168	21357221	2542094	1183253	1742517	1619591	36.4	23.9	20.8	17	-1.4	0.4	1.2	0.5	1.4	0.3	1.7	0.03	1.9	0.005	1.1	0.5	0.007
Q$893	P10639	THIO_MOUSE	Txn	Thioredoxin	1	54.29	6	15499736	9540127	16953172	22607027	3414629	1165449	1534730	1114892	49.3	27.3	20.2	11	-1.6	0.3	1.1	0.7	1.5	0.2	1.8	0.02	2.4	0.0002	1.3	0.07	0.003
Q$960	P19157	GSTP1_MOUSE	Gstp1	Glutathione S-transferase P 1	1	67.14	7	15420860	11873087	14858017	15948609	1503545	535554	621507	1500853	21.8	10.1	9.4	21	-1.3	0.2	-1	0.9	1	0.9	1.3	0.04	1.3	0.2	1.1	0.9	0.09
Q$509	E9Q3P9	E9Q3P9_MOUSE	Rab11a	Ras-related protein Rab-11A	1	26.8	4	15386516	13569974	14296013	15248695	2528366	1781480	1018887	2352455	36.7	29.4	15.9	34.5	-1.1	1	-1.1	1	-1	1	1.1	1	1.1	1	1.1	1	0.9
Q$878	P08752	GNAI2_MOUSE	Gnai2	Guanine nucleotide-binding protein G(i) subunit alpha-2	1	49.3	15	15241932	12594537	17486757	20510435	2788052	1541217	1860334	1987883	40.9	27.4	23.8	21.7	-1.2	0.7	1.1	0.7	1.3	0.5	1.4	0.3	1.6	0.08	1.2	0.7	0.09
Q$1552	Q6ZWX6	IF2A_MOUSE	Eif2s1	Eukaryotic translation initiation factor 2 subunit 1	1	25.08	6	15216199	11987976	14858310	17308499	2860711	946548	2132167	1390020	42	17.7	32.1	18	-1.3	0.8	-1	0.9	1.1	0.8	1.2	0.8	1.4	0.08	1.2	0.8	0.3
Q$1189	P62309	RUXG_MOUSE	Snrpg	Small nuclear ribonucleoprotein G	1	57.89	2	15176490	12317500	16997090	19337000	2129789	1823967	1509192	1734213	31.4	33.1	19.9	20.1	-1.2	0.7	1.1	0.7	1.3	0.5	1.4	0.4	1.6	0.1	1.1	0.7	0.08
Q$1472	Q61990-2	PCBP2_MOUSE	Pcbp	Isoform 2 of Poly(rC)-binding protein 2	1	50.45	11	15092167	12812517	16286483	17972093	1600400	705285	1249990	1233964	23.7	12.3	17.2	15.4	-1.2	0.6	1.1	0.6	1.2	0.6	1.3	0.2	1.4	0.04	1.1	0.6	0.06
Q$1083	P47754	CAZA2_MOUSE	Capza2	F-actin-capping protein subunit alpha-2	1	25.17	4	15020013	12152635	16146755	17860638	1751993	1547347	1446890	1518075	26.1	28.5	20	19	-1.2	0.7	1.1	0.7	1.2	0.7	1.3	0.4	1.5	0.2	1.1	0.7	0.1
Q$1924	Q9D1G1	RAB1B_MOUSE	Rab1b	Ras-related protein Rab-1B	1	38.81	6	14993221	12309662	14372836	17946009	2060653	1267125	1514632	2025491	30.7	23	23.6	25.2	-1.2	0.8	-1	0.8	1.2	0.8	1.2	0.8	1.5	0.2	1.2	0.7	0.2
Q$211	Q91V55	Q91V55_MOUSE	Rps5	40S ribosomal protein S5	1	50.49	10	14927192	12158010	16453802	23628080	1938919	600266	966992	1736970	29	11	13.1	16.4	-1.2	0.4	1.1	0.5	1.6	0.03	1.4	0.03	1.9	0.001	1.4	0.03	0.0002
Q$1097	P49312	ROA1_MOUSE	Hnrnpa1	Heterogeneous nuclear ribonucleoprotein A1	1	39.38	14	14780303	11041606	19238486	27846546	2441097	1259931	1487888	3632411	36.9	25.5	17.3	29.2	-1.3	0.3	1.3	0.3	1.9	0.07	1.7	0.01	2.5	0.01	1.4	0.2	0.0009
Q$1362	Q61316	HSP74_MOUSE	Hspa4	Heat shock 70 kDa protein 4	1	36.74	17	14757034	13571673	15018837	18019546	834665	466399	457248	931769	12.6	7.7	6.8	11.6	-1.1	0.4	1	0.8	1.2	0.1	1.1	0.2	1.3	0.02	1.2	0.1	0.003
Q$1141	P57759	ERP29_MOUSE	Erp29	Endoplasmic reticulum resident protein 29	1	54.2	11	14666992	12156361	16462121	16845733	1759110	951419	1206585	972199	26.8	17.5	16.4	12.9	-1.2	0.7	1.1	0.7	1.1	0.7	1.4	0.1	1.4	0.05	1	0.8	0.07
Q$1519	Q6IFX2	K1C42_MOUSE	Krt42	Keratin, type I cytoskeletal 42	1	13.27	6	14653997	11362952	20726511	26517221	2199968	1658168	2654317	2046736	33.6	32.6	28.6	17.3	-1.3	0.3	1.4	0.3	1.8	0.02	1.8	0.07	2.3	0.003	1.3	0.3	0.0007
Q$587	F6WHQ7	F6WHQ7_MOUSE	Gstm1	Glutathione S-transferase Mu 1 (Fragment)	1	11.86	2	14590583	13012539	14207377	14893581	1063694	892902	850459	944342	16.3	15.3	13.4	14.2	-1.1	0.8	-1	1	1	1	1.1	0.8	1.1	0.7	1	0.9	0.5
Q$1469	Q61881	MCM7_MOUSE	Mcm7	DNA replication licensing factor MCM7	1	14.46	7	14577223	11765123	15838741	20683857	2971564	2294059	2375166	3049080	45.6	43.6	33.5	33	-1.2	0.7	1.1	0.7	1.4	0.7	1.3	0.7	1.8	0.3	1.3	0.7	0.2
Q$1236	P63276	RS17_MOUSE	Rps17	40S ribosomal protein S17	1	56.3	10	14576539	12040538	19538398	26220881	2299666	1166317	1521932	1712867	35.3	21.7	17.4	14.6	-1.2	0.4	1.3	0.2	1.8	0.02	1.6	0.02	2.2	0.0008	1.3	0.06	0.0001
Q$961	P19253	RL13A_MOUSE	Rpl13a	60S ribosomal protein L13a	1	24.63	5	14485790	12095723	15042583	18675436	2507767	2132176	2196241	3271927	38.7	39.4	32.6	39.2	-1.2	0.9	1	0.9	1.3	0.9	1.2	0.9	1.5	0.6	1.2	0.9	0.4
Q$1931	Q9D2G2	ODO2_MOUSE	Dlst	Dihydrolipoyllysine-residue succinyltransferase component of 2-oxoglutarate dehydrogenase complex, mitochondrial	1	21.37	8	14464864	11794988	15539036	16467616	1361046	1068866	1318283	961178	21	20.3	19	13.1	-1.2	0.5	1.1	0.8	1.1	0.6	1.3	0.3	1.4	0.07	1.1	0.8	0.07
Q$1006	P27661	H2AX_MOUSE	H2afx	Histone H2AX	1	55.94	13	14390524	13453576	13892241	21769131	1667672	1551688	1364159	6906433	25.9	25.8	22	70.9	-1.1	1	-1	1	1.5	0.9	1	1	1.6	0.9	1.6	0.9	0.4
Q$1421	Q60749	KHDR1_MOUSE	Khdrbs1	KH domain-containing, RNA-binding, signal transduction-associated protein 1	0.9998	12.19	3	14340527	13591140	14485244	14876121	639341	1020009	734674	1282956	10	16.8	11.3	19.3	-1.1	1	1	1	1	1	1.1	1	1.1	1	1	1	0.8
Q$1727	Q8VEM8	MPCP_MOUSE	Slc25a3	Phosphate carrier protein, mitochondrial	1	23.81	7	14316027	12469259	14188191	14800143	800694	738229	966705	1542752	12.5	13.2	15.2	23.3	-1.1	0.6	-1	1	1	1	1.1	0.7	1.2	0.7	1	1	0.5
Q$1179	P62204	CALM_MOUSE	Calm1	Calmodulin	1	45.64	7	14292647	10232794	15362489	20793799	2563449	962992	768242	943726	40.1	21	11.2	10.1	-1.4	0.3	1.1	0.7	1.5	0.1	1.5	0.01	2	0.0003	1.4	0.01	0.001
Q$1363	Q3U367	Q3U367_MOUSE	Aldh9a1	4-trimethylaminobutyraldehyde dehydrogenase	1	26.06	7	14257214	9881244	15279498	16569446	2079809	697559	1041646	768280	32.6	15.8	15.2	10.4	-1.4	0.3	1.1	0.7	1.2	0.7	1.5	0.01	1.7	0.001	1.1	0.7	0.01
Q$1206	P62843	RS15_MOUSE	Rps15	40S ribosomal protein S15	1	33.79	4	14254042	12319580	13635187	14342159	1460057	644481	1538228	1408884	22.9	11.7	25.2	22	-1.2	0.8	-1	1	1	1	1.1	0.9	1.2	0.8	1.1	1	0.7
Q$1668	Q8CIN4	PAK2_MOUSE	Pak2	Serine/threonine-protein kinase PAK 2	1	33.59	9	14173029	10727711	14510449	32403297	1987931	1931537	1529070	9584862	31.4	40.3	23.6	66.1	-1.3	0.5	1	0.9	2.3	0.5	1.4	0.5	3	0.4	2.2	0.5	0.03
Q$1915	Q9D0T1	NH2L1_MOUSE	Nhp2l1	NHP2-like protein 1	1	37.5	3	14083305	10935338	15088013	17525270	1844057	607142	1453492	704994	29.3	12.4	21.5	9	-1.3	0.4	1.1	0.7	1.2	0.4	1.4	0.1	1.6	0.0006	1.2	0.4	0.02
Q$2092	Q9Z110-2	P5CS_MOUSE	Aldh18a	Isoform Short of Delta-1-pyrroline-5-carboxylate synthase	1	21.06	11	14048309	10374329	15122693	18577172	2540092	1317099	1364984	1222788	40.4	28.4	20.2	14.7	-1.4	0.4	1.1	0.7	1.3	0.4	1.5	0.2	1.8	0.01	1.2	0.3	0.03
Q$1192	P62320	SMD3_MOUSE	Snrpd3	Small nuclear ribonucleoprotein Sm D3	1	47.62	4	14031839	12502758	16684532	19667326	1664479	1121381	1338314	1327290	26.5	20.1	17.9	15.1	-1.1	0.5	1.2	0.4	1.4	0.1	1.3	0.2	1.6	0.02	1.2	0.4	0.01
Q$1109	P50580	PA2G4_MOUSE	Pa2g4	Proliferation-associated protein 2G4	1	45.94	14	13963669	9852724	18546637	22938167	3541676	1383283	2647948	3523515	56.7	31.4	31.9	34.3	-1.4	0.7	1.3	0.7	1.6	0.4	1.9	0.09	2.3	0.05	1.2	0.7	0.03
Q$2078	Q9WUP7-2	UCHL5_MOUSE	Uchl	Isoform 2 of Ubiquitin carboxyl-terminal hydrolase isozyme L5	0.9668	3.35	1	13922700	8366875	16802000	21298450	3338415	1960575	2007113	2034951	53.6	52.4	26.7	21.4	-1.7	0.4	1.2	0.5	1.5	0.3	2	0.08	2.5	0.01	1.3	0.4	0.01
Q$504	E9Q1Y9	E9Q1Y9_MOUSE	5430421N21Rik	Protein 5430421N21Rik	1	21.09	16	13679454	15039685	10225587	124002290	2205883	7528708	645632	96193226	36.1	111.9	14.1	173.5	1.1	0.9	-1.3	0.7	9.1	0.8	-1.5	0.8	8.2	0.8	12.1	0.8	0.3
Q$1440	Q61096	PRTN3_MOUSE	Prtn3	Myeloblastin	1	30.71	5	13663902	10644251	16127323	17169354	1748035	1591016	1440232	979668	28.6	33.4	20	12.8	-1.3	0.6	1.2	0.6	1.3	0.4	1.5	0.2	1.6	0.05	1.1	0.6	0.03
Q$1427	Q60972	RBBP4_MOUSE	Rbbp4	Histone-binding protein RBBP4	1	33.88	9	13464115	11769449	13213805	18181036	434346	450872	440246	1418212	7.2	8.6	7.4	17.4	-1.1	0.1	-1	0.7	1.4	0.1	1.1	0.1	1.5	0.05	1.4	0.1	0.0002
Q$1255	P70296	PEBP1_MOUSE	Pebp1	Phosphatidylethanolamine-binding protein 1	1	68.98	7	13431420	9819603	14192034	17803046	2650821	1325885	1802447	1093278	44.1	30.2	28.4	13.7	-1.4	0.4	1.1	0.8	1.3	0.4	1.4	0.4	1.8	0.01	1.3	0.4	0.05
Q$1191	P62317	SMD2_MOUSE	Snrpd2	Small nuclear ribonucleoprotein Sm D2	1	55.93	7	13391616	10855307	16409462	20025387	1875331	1518607	1207015	1977675	31.3	31.3	16.4	22.1	-1.2	0.4	1.2	0.4	1.5	0.2	1.5	0.1	1.8	0.04	1.2	0.4	0.008
Q$927	P14869	RLA0_MOUSE	Rplp0	60S acidic ribosomal protein P0	1	54.26	11	13383025	11482360	15291864	18842942	1762808	1919775	1666483	1636216	29.5	37.4	24.4	19.4	-1.2	0.7	1.1	0.7	1.4	0.2	1.3	0.5	1.6	0.1	1.2	0.5	0.05
Q$503	E9Q1X1	E9Q1X1_MOUSE	Gm8420	Ribosomal protein L15	1	14.71	3	13374883	11218547	13478727	16260673	1490828	902565	1233131	1044622	24.9	18	20.5	14.4	-1.2	0.5	1	1	1.2	0.5	1.2	0.5	1.4	0.04	1.2	0.5	0.06
Q$2010	Q9JHI5	IVD_MOUSE	Ivd	Isovaleryl-CoA dehydrogenase, mitochondrial	1	16.75	4	13374696	13826664	13316991	20783087	1495085	1603938	1888758	7703365	25	25.9	31.7	82.9	1	1	-1	1	1.6	1	-1	1	1.5	1	1.6	1	0.5
Q$1471	Q61990-3	PCBP2_MOUSE	Pcbp	Isoform 3 of Poly(rC)-binding protein 2	1	39.26	9	13373788	11199191	14696885	16262763	1399147	627724	1161308	1010800	23.4	12.5	17.7	13.9	-1.2	0.5	1.1	0.6	1.2	0.4	1.3	0.1	1.5	0.02	1.1	0.6	0.03
Q$2051	Q9QZQ8-2	H2AY_MOUSE	H2af	Isoform 1 of Core histone macro-H2A.1	1	25.75	6	13201588	9211183	15292829	30655184	3230125	1562646	2108636	13460425	54.7	37.9	30.8	98.2	-1.4	0.7	1.2	0.7	2.3	0.7	1.7	0.3	3.3	0.6	2	0.7	0.2
Q$715	H3BL49	H3BL49_MOUSE	Cct8	T-complex protein 1 subunit theta	1	30.06	11	13120902	10769520	14570167	20766574	2063375	1487314	2030370	2583161	35.2	30.9	31.2	27.8	-1.2	0.6	1.1	0.6	1.6	0.2	1.4	0.4	1.9	0.06	1.4	0.3	0.02
Q$1320	Q04447	KCRB_MOUSE	Ckb	Creatine kinase B-type	0.9999	19.95	5	13083165	12820813	17782272	17969226	2275070	2057852	1536073	3065301	38.9	35.9	19.3	38.1	-1	1	1.4	0.5	1.4	0.6	1.4	0.4	1.4	0.6	1	1	0.2
Q$1517	Q6GQT9	NOMO1_MOUSE	Nomo1	Nodal modulator 1	1	6.84	5	13068634	11962139	13508609	14152261	1179980	1080760	1379167	1100708	20.2	20.2	22.8	17.4	-1.1	0.9	1	0.9	1.1	0.9	1.1	0.9	1.2	0.7	1	0.9	0.6
Q$1850	Q9CQI6	COTL1_MOUSE	Cotl1	Coactosin-like protein	1	47.18	6	12944182	7702949	15309485	20006453	3286612	1056771	1571155	1532158	56.8	30.7	22.9	17.1	-1.7	0.3	1.2	0.5	1.5	0.2	2	0.02	2.6	0.001	1.3	0.2	0.005
Q$137	B2RXM2	B2RXM2_MOUSE	Gm6793	EG627828 protein	1	27.07	13	12807799	9996801	14286188	17367474	1688976	948662	1093682	1476625	29.5	21.2	17.1	19	-1.3	0.3	1.1	0.5	1.4	0.3	1.4	0.09	1.7	0.02	1.2	0.3	0.01
Q$1487	Q62425	NDUA4_MOUSE	Ndufa4	NADH dehydrogenase [ubiquinone] 1 alpha subcomplex subunit 4	1	37.8	4	12794348	9976371	13863177	17612996	2409546	1473706	1264857	1112117	42.1	33	20.4	14.1	-1.3	0.6	1.1	0.7	1.4	0.3	1.4	0.3	1.8	0.02	1.3	0.3	0.03
Q$1197	P62746	RHOB_MOUSE	Rhob	Rho-related GTP-binding protein RhoB	1	16.84	3	12790317	10571880	12547990	14695810	2301929	1282584	1100032	1046096	40.2	27.1	19.6	15.9	-1.2	0.8	-1	0.9	1.1	0.8	1.2	0.7	1.4	0.2	1.2	0.7	0.3
Q$1190	P62315	SMD1_MOUSE	Snrpd1	Small nuclear ribonucleoprotein Sm D1	1	54.62	6	12701135	12126186	15730726	16069875	1298475	1172750	1888014	977404	22.9	21.6	26.8	13.6	-1	0.9	1.2	0.5	1.3	0.3	1.3	0.5	1.3	0.2	1	0.9	0.1
Q$252	D3Z4A4	D3Z4A4_MOUSE	Prdx2	Peroxiredoxin-2 (Fragment)	1	44.9	4	12607414	10276772	13062165	15546835	1540899	893474	1360897	1533703	27.3	19.4	23.3	22.1	-1.2	0.6	1	0.8	1.2	0.6	1.3	0.5	1.5	0.1	1.2	0.6	0.09
Q$644	G3UWA6	G3UWA6_MOUSE	Slc3a2	4F2 cell-surface antigen heavy chain	1	26.9	10	12571142	11265454	12344153	13248155	1218361	972140	1335448	1134319	21.7	19.3	24.2	19.1	-1.1	0.9	-1	1	1.1	1	1.1	1	1.2	0.8	1.1	1	0.7
Q$1860	Q9CQV8-2	1433B_MOUSE	Ywha	Isoform Short of 14-3-3 protein beta/alpha	1	58.2	13	12560955	10405040	14157972	17828205	2032177	1144777	1254961	983639	36.2	24.6	19.8	12.3	-1.2	0.6	1.1	0.6	1.4	0.2	1.4	0.2	1.7	0.007	1.3	0.2	0.01
Q$1709	Q8R5L1	Q8R5L1_MOUSE	C1qbp	Complement component 1 Q subcomponent-binding protein, mitochondrial	1	46.95	8	12522952	11409603	12265673	15752842	1077500	868750	897800	471832	19.2	17	16.4	6.7	-1.1	0.8	-1	0.9	1.3	0.1	1.1	0.8	1.4	0.01	1.3	0.04	0.01
Q$1962	Q9DB15	RM12_MOUSE	Mrpl12	39S ribosomal protein L12, mitochondrial	1	31.34	5	12433597	10321101	11588782	15207891	1237915	1329581	1211770	1265624	22.3	28.8	23.4	18.6	-1.2	0.6	-1.1	0.8	1.2	0.5	1.1	0.8	1.5	0.2	1.3	0.3	0.08
Q$1996	Q9EQP2	EHD4_MOUSE	Ehd4	EH domain-containing protein 4	1	8.87	4	12375135	12868660	11909724	22860233	1970844	1869731	1639425	9820760	35.6	32.5	30.8	96.1	1	1	-1	1	1.8	0.9	-1.1	1	1.8	0.9	1.9	0.9	0.4
Q$2097	Q9Z1N5	DX39B_MOUSE	Ddx39b	Spliceosome RNA helicase Ddx39b	1	40.65	13	12368483	9165204	14151802	19087380	2303044	1274294	1349697	1761547	41.6	31.1	21.3	20.6	-1.3	0.4	1.1	0.5	1.5	0.2	1.5	0.1	2.1	0.01	1.3	0.2	0.007
Q$1301	P97821	CATC_MOUSE	Ctsc	Dipeptidyl peptidase 1	1	20.13	8	12322801	9170844	13218882	16397983	1895759	960355	1270805	1599984	34.4	23.4	21.5	21.8	-1.3	0.5	1.1	0.7	1.3	0.5	1.4	0.2	1.8	0.03	1.2	0.5	0.03
Q$1530	Q6P5E4	UGGG1_MOUSE	Uggt1	UDP-glucose:glycoprotein glucosyltransferase 1	1	11.48	9	12283983	9509641	12900714	13969980	2023659	1642041	1499345	1611352	36.8	38.6	26	25.8	-1.3	0.8	1.1	0.9	1.1	0.9	1.4	0.6	1.5	0.4	1.1	0.9	0.3
Q$1316	Q02257	PLAK_MOUSE	Jup	Junction plakoglobin	1	11.01	5	12255587	9891386	12398818	12246751	844832	253941	920914	1061668	15.4	5.7	16.6	19.4	-1.2	0.2	1	1	-1	1	1.3	0.2	1.2	0.3	-1	1	0.1
Q$1107	P50518	VATE1_MOUSE	Atp6v1e1	V-type proton ATPase subunit E 1	1	33.63	4	12246726	12386705	12748876	13036392	266265	425048	413986	683282	4.9	7.7	7.3	11.7	1	0.9	1	0.9	1.1	0.9	1	0.9	1.1	0.9	1	0.9	0.6
Q$1887	Q9CY02	AHSP_MOUSE	Ahsp	Alpha-hemoglobin-stabilizing protein	1	33.33	3	12216191	10900523	13456521	13841922	2917104	2617493	3277109	3015151	53.4	53.7	54.5	48.7	-1.1	1	1.1	1	1.1	1	1.2	1	1.3	1	1	1	0.9
Q$2099	Q9Z1Q9	SYVC_MOUSE	Vars	Valine--tRNA ligase	1	14.65	10	12178154	10821871	11572479	25446725	1879733	1548048	1220084	7128945	34.5	32	23.6	62.6	-1.1	0.9	-1.1	0.9	2.1	0.5	1.1	0.9	2.4	0.5	2.2	0.5	0.05
Q$653	Q60930	VDAC2_MOUSE	Vdac2	Voltage-dependent anion-selective channel protein 2	1	40.68	10	12135275	10328691	13020201	15457681	1813428	1140250	1079798	1111022	33.4	24.7	18.5	16.1	-1.2	0.7	1.1	0.7	1.3	0.5	1.3	0.5	1.5	0.07	1.2	0.5	0.09
Q$230	Q62189	SNRPA_MOUSE	Snrpa	U1 small nuclear ribonucleoprotein A	0.9996	16.38	3	12132954	9080869	11739953	16415168	2422591	693226	835377	1846780	44.6	17.1	15.9	25.2	-1.3	0.5	-1	0.9	1.4	0.5	1.3	0.2	1.8	0.03	1.4	0.2	0.04
Q$554	E9QJW9	E9QJW9_MOUSE	Tpsb2	Tryptase beta-2	1	27.54	7	12056440	10200429	10839074	11514977	1827525	1806722	1508181	1761264	33.9	39.6	31.1	34.2	-1.2	1	-1.1	1	-1	1	1.1	1	1.1	1	1.1	1	0.9
Q$2077	Q9WUM5	SUCA_MOUSE	Suclg1	Succinyl-CoA ligase [ADP/GDP-forming] subunit alpha, mitochondrial	1	19.36	5	12010507	11034436	12592445	12680850	402349	992971	691351	897810	7.5	20.1	12.3	15.8	-1.1	0.9	1	0.9	1.1	0.9	1.1	0.8	1.1	0.8	1	0.9	0.4
Q$475	Q9CXW4	RL11_MOUSE	Rpl11	60S ribosomal protein L11	1	48.31	9	11950371	9002518	12724115	23560255	2271391	1319538	1897063	7791399	42.5	32.8	33.3	73.9	-1.3	0.6	1.1	0.8	2	0.6	1.4	0.6	2.6	0.6	1.9	0.6	0.1
Q$180	D3YVN7	D3YVN7_MOUSE	Gm9755	Elongation factor Tu	1	29.2	11	11893905	10836651	12161710	17375868	1789778	1385469	1684700	4357475	33.6	28.6	31	56.1	-1.1	0.9	1	0.9	1.5	0.8	1.1	0.9	1.6	0.8	1.4	0.8	0.3
Q$1811	Q99LX0	PARK7_MOUSE	Park7	Protein DJ-1	1	47.09	10	11848342	9267688	12202976	14186342	1950355	987817	974060	638034	36.8	23.8	17.8	10.1	-1.3	0.6	1	0.9	1.2	0.6	1.3	0.3	1.5	0.02	1.2	0.4	0.08
Q$487	E9Q070	E9Q070_MOUSE	Gm8730	Uncharacterized protein	1	43.22	12	11845471	9517998	13500625	17291735	1966122	1436379	1374476	1673696	37.1	33.7	22.8	21.6	-1.2	0.6	1.1	0.6	1.5	0.3	1.4	0.3	1.8	0.05	1.3	0.3	0.03
Q$1242	P67984	RL22_MOUSE	Rpl22	60S ribosomal protein L22	1	51.56	6	11830378	9018662	14319639	17865038	1551577	703953	749322	1396116	29.3	17.5	11.7	17.5	-1.3	0.3	1.2	0.3	1.5	0.08	1.6	0.004	2	0.003	1.2	0.2	0.0005
Q$1296	P97450	ATP5J_MOUSE	Atp5j	ATP synthase-coupling factor 6, mitochondrial	1	43.52	4	11768239	10048473	11503475	13403157	1390387	1043256	1326503	1855028	26.4	23.2	25.8	30.9	-1.2	0.9	-1	0.9	1.1	0.9	1.1	0.9	1.3	0.6	1.2	0.9	0.5
Q$2003	Q9ERU9	RBP2_MOUSE	Ranbp2	E3 SUMO-protein ligase RanBP2	0.9989	0.75	2	11724508	11112855	10356023	12686405	2253257	1888761	2453263	2465469	43	38	53	43.5	-1.1	1	-1.1	1	1.1	1	-1.1	1	1.1	1	1.2	1	0.9
Q$719	H3BLL4	H3BLL4_MOUSE	Hnrnpk	Heterogeneous nuclear ribonucleoprotein K	1	41.12	14	11714274	8710404	12987618	16205805	1442790	503528	426687	1044266	27.5	12.9	7.3	14.4	-1.3	0.2	1.1	0.4	1.4	0.1	1.5	0.001	1.9	0.001	1.2	0.08	0.0004
Q$1074	P46061	RAGP1_MOUSE	Rangap1	Ran GTPase-activating protein 1	1	22.75	8	11710126	8493319	16203809	19528370	2488253	1372428	1585505	1562202	47.5	36.1	21.9	17.9	-1.4	0.4	1.4	0.4	1.7	0.1	1.9	0.03	2.3	0.004	1.2	0.4	0.003
Q$1842	Q9CQ54	NDUC2_MOUSE	Ndufc2	NADH dehydrogenase [ubiquinone] 1 subunit C2	0.9741	15.83	1	11631300	8978210	11145900	12258760	1492541	977057	985460	1770478	28.7	24.3	19.8	32.3	-1.3	0.6	-1	1	1.1	1	1.2	0.6	1.4	0.6	1.1	0.9	0.4
Q$1220	P63001	RAC1_MOUSE	Rac1	Ras-related C3 botulinum toxin substrate 1	1	32.29	5	11557498	8815938	10007769	29889965	1403099	1839322	726596	13789808	27.1	46.7	16.2	103.2	-1.3	0.7	-1.2	0.7	2.6	0.7	1.1	0.7	3.4	0.7	3	0.7	0.2
Q$786	O35658	C1QBP_MOUSE	C1qbp	Complement component 1 Q subcomponent-binding protein, mitochondrial	1	39.93	7	11522962	10460977	11359768	14589019	983609	823760	893070	454121	19.1	17.6	17.6	7	-1.1	0.8	-1	0.9	1.3	0.09	1.1	0.8	1.4	0.01	1.3	0.06	0.01
Q$1444	Q61176	ARGI1_MOUSE	Arg1	Arginase-1	1	26.32	6	11414942	10340208	13504998	13544728	790283	553193	911536	1255228	15.5	12	15.1	20.7	-1.1	0.5	1.2	0.4	1.2	0.5	1.3	0.1	1.3	0.2	1	1	0.06
Q$1300	P97807-2	FUMH_MOUSE	F	Isoform Cytoplasmic of Fumarate hydratase, mitochondrial	1	50.32	13	11332181	9208723	12062645	13353929	1463101	906504	1010868	848058	28.9	22	18.7	14.2	-1.2	0.7	1.1	0.7	1.2	0.7	1.3	0.3	1.5	0.06	1.1	0.7	0.09
Q$1425	Q60932-2	VDAC1_MOUSE	Vdac	Isoform Mt-VDAC1 of Voltage-dependent anion-selective channel protein 1	1	58.66	12	11275076	9288199	11967322	14307566	1162388	753168	415802	856799	23.1	18.1	7.8	13.4	-1.2	0.3	1.1	0.6	1.3	0.2	1.3	0.07	1.5	0.01	1.2	0.1	0.006
Q$1819	Q99N15	Q99N15_MOUSE	Hsd17b10	17beta-hydroxysteroid dehydrogenase type 10/short chain L-3-hydroxyacyl-CoA dehydrogenase	1	63.98	9	11254112	10172997	9634619	16827344	242180	519778	294583	4517863	4.8	11.4	6.8	60	-1.1	0.4	-1.2	0.02	1.5	0.6	-1.1	0.6	1.7	0.6	1.7	0.6	0.1
Q$1884	Q9CXE7	TMED5_MOUSE	Tmed5	Transmembrane emp24 domain-containing protein 5	0.9996	24.02	3	11245292	9899422	11190695	11924346	699633	521653	778185	563721	13.9	11.8	15.5	10.6	-1.1	0.6	-1	1	1.1	0.8	1.1	0.6	1.2	0.2	1.1	0.8	0.2
Q$825	O88696	CLPP_MOUSE	Clpp	Putative ATP-dependent Clp protease proteolytic subunit, mitochondrial	1	16.54	3	11237603	9324444	11606855	11329980	636699	347986	433114	1222063	12.7	8.3	8.3	24.1	-1.2	0.1	1	1	1	1	1.2	0.02	1.2	0.5	-1	1	0.2
Q$191	P47963	RL13_MOUSE	Rpl13	60S ribosomal protein L13	1	13.27	3	11223855	8977900	14031220	16372400	1692085	1425197	1738533	1309985	33.7	35.5	27.7	17.9	-1.3	0.6	1.3	0.6	1.5	0.2	1.6	0.2	1.8	0.03	1.2	0.6	0.02
Q$2006	Q9EST5-2	AN32B_MOUSE	Anp32	Isoform 2 of Acidic leucine-rich nuclear phosphoprotein 32 family member B	1	29.79	8	11207918	8222745	13516208	15490418	2453869	1390363	1527659	1026262	49	37.8	25.3	14.8	-1.4	0.7	1.2	0.7	1.4	0.5	1.6	0.2	1.9	0.02	1.1	0.7	0.04
Q$1621	Q8BMF4	ODP2_MOUSE	Dlat	Dihydrolipoyllysine-residue acetyltransferase component of pyruvate dehydrogenase complex, mitochondrial	1	16.04	8	11187289	9304946	11703170	13101515	943254	1101878	1321195	1334385	18.9	26.5	25.2	22.8	-1.2	0.7	1	0.8	1.2	0.7	1.3	0.7	1.4	0.3	1.1	0.7	0.2
Q$1127	P54116	STOM_MOUSE	Stom	Erythrocyte band 7 integral membrane protein	0.9999	14.08	3	11148814	8889391	12490699	15840623	1363398	683350	724844	1012860	27.3	17.2	13	14.3	-1.3	0.3	1.1	0.4	1.4	0.09	1.4	0.03	1.8	0.003	1.3	0.09	0.001
Q$1238	P63323	RS12_MOUSE	Rps12	40S ribosomal protein S12	1	36.36	4	11089207	8958612	12637389	14483547	1932509	715570	1608632	721296	39	17.9	28.5	11.1	-1.2	0.7	1.1	0.7	1.3	0.4	1.4	0.3	1.6	0.004	1.1	0.7	0.06
Q$27	A2AE38	A2AE38_MOUSE	Amigo1	Amphoterin-induced protein 1 (Fragment)	0.9018	2.4	1	11075570	10165760	7492990	7417780	1343260	793036	720221	518508	27.1	17.4	21.5	15.6	-1.1	0.8	-1.5	0.2	-1.5	0.2	-1.4	0.2	-1.4	0.1	-1	0.9	0.02
Q$1177	P62192	PRS4_MOUSE	Psmc1	26S protease regulatory subunit 4	1	25.68	8	11022696	9035289	14217324	13898154	1776351	699831	1408557	680655	36	17.3	22.2	11	-1.2	0.5	1.3	0.5	1.3	0.5	1.6	0.05	1.5	0.006	-1	0.8	0.03
Q$1665	Q8CI43	MYL6B_MOUSE	Myl6b	Myosin light chain 6B	1	10.14	2	11010453	7580717	11014307	15986877	2350227	1237978	1348952	1853509	47.7	36.5	27.4	25.9	-1.5	0.4	1	1	1.5	0.4	1.5	0.3	2.1	0.03	1.5	0.3	0.03
Q$588	P61082	UBC12_MOUSE	Ube2m	NEDD8-conjugating enzyme Ubc12	0.9999	13.11	2	10981808	13329392	10574274	20959911	2428936	3435946	3344639	9190753	49.5	57.6	70.7	98	1.2	0.9	-1	0.9	1.9	0.9	-1.3	0.9	1.6	0.9	2	0.9	0.5
Q$1577	Q80X90	FLNB_MOUSE	Flnb	Filamin-B	1	6.84	12	10921400	8124302	10498305	20565142	2354136	654954	921565	5714140	48.2	18	19.6	62.1	-1.3	0.5	-1	0.9	1.9	0.5	1.3	0.3	2.5	0.4	2	0.5	0.06
Q$1252	P70168	IMB1_MOUSE	Kpnb1	Importin subunit beta-1	1	14.27	8	10797001	8203377	12849998	16473606	2136740	641894	1266448	1068772	44.3	17.5	22	14.5	-1.3	0.5	1.2	0.5	1.5	0.2	1.6	0.06	2	0.001	1.3	0.2	0.005
Q$1454	Q61598	GDIB_MOUSE	Gdi2	Rab GDP dissociation inhibitor beta	1	40.67	15	10765210	8335272	12508907	14871124	1293536	646328	688273	1097329	26.9	17.3	12.3	16.5	-1.3	0.3	1.2	0.3	1.4	0.2	1.5	0.01	1.8	0.005	1.2	0.3	0.002
Q$1986	Q9DCN2-2	NB5R3_MOUSE	Cyb5r	Isoform 2 of NADH-cytochrome b5 reductase 3	1	53.6	10	10755010	7060311	11522937	13276007	1237324	599532	749572	852759	25.7	19	14.5	14.4	-1.5	0.1	1.1	0.6	1.2	0.3	1.6	0.008	1.9	0.002	1.2	0.3	0.001
Q$1762	Q922B2	SYDC_MOUSE	Dars	Aspartate--tRNA ligase, cytoplasmic	1	21.76	9	10737096	8149301	10903259	15973096	1864542	843963	1328885	2613929	38.8	23.2	27.3	36.6	-1.3	0.5	1	0.9	1.5	0.5	1.3	0.5	2	0.1	1.5	0.5	0.05
Q$36	A2AFQ2	A2AFQ2_MOUSE	Hsd17b10	3-hydroxyacyl-CoA dehydrogenase type-2	1	56.46	8	10729384	9675699	9052963	16277148	197543	475852	259839	4500481	4.1	11	6.4	61.8	-1.1	0.3	-1.2	0.005	1.5	0.6	-1.1	0.6	1.7	0.6	1.8	0.6	0.1
Q$1693	Q8QZY9	SF3B4_MOUSE	Sf3b4	Splicing factor 3B subunit 4	1	10.61	3	10727855	8412558	11001218	11858691	1244033	786544	510113	840314	25.9	20.9	10.4	15.8	-1.3	0.5	1	0.8	1.1	0.8	1.3	0.1	1.4	0.1	1.1	0.8	0.08
Q$1615	Q8BKC5	IPO5_MOUSE	Ipo5	Importin-5	1	11.39	8	10689933	8590196	12295234	16219737	1631761	909496	1322435	1307767	34.1	23.7	24.1	18	-1.2	0.5	1.2	0.5	1.5	0.1	1.4	0.2	1.9	0.008	1.3	0.2	0.006
Q$1204	P62830	RL23_MOUSE	Rpl23	60S ribosomal protein L23	1	35.71	5	10638097	8518093	13021139	16160643	1795545	827642	862309	533831	37.7	21.7	14.8	7.4	-1.2	0.5	1.2	0.5	1.5	0.1	1.5	0.03	1.9	0.0003	1.2	0.06	0.001
Q$1623	Q8BMK4	CKAP4_MOUSE	Ckap4	Cytoskeleton-associated protein 4	1	26.61	11	10573793	8615042	10780040	14093564	1465107	766015	708522	1205389	31	19.9	14.7	19.1	-1.2	0.5	1	0.9	1.3	0.3	1.3	0.3	1.6	0.03	1.3	0.2	0.02
Q$1672	Q8JZQ9	EIF3B_MOUSE	Eif3b	Eukaryotic translation initiation factor 3 subunit B	1	19.55	8	10570797	8561173	13445090	15628189	1724998	1397868	1468174	837791	36.5	36.5	24.4	12	-1.2	0.5	1.3	0.5	1.5	0.1	1.6	0.2	1.8	0.01	1.2	0.5	0.01
Q$1322	Q04750	TOP1_MOUSE	Top1	DNA topoisomerase 1	1	16.04	9	10547062	9307816	11652669	12314781	1420802	1228679	1721731	1452445	30.1	29.5	33	26.4	-1.1	0.9	1.1	0.9	1.2	0.9	1.3	0.8	1.3	0.6	1.1	0.9	0.5
Q$827	O88844	IDHC_MOUSE	Idh1	Isocitrate dehydrogenase [NADP] cytoplasmic	1	36.96	11	10531811	8078041	11689351	24732986	1506896	1239586	881158	8051724	32	34.3	16.9	72.8	-1.3	0.5	1.1	0.5	2.3	0.5	1.4	0.2	3.1	0.4	2.1	0.5	0.05
Q$1428	Q60973	RBBP7_MOUSE	Rbbp7	Histone-binding protein RBBP7	1	42.82	12	10343307	8447835	11030365	12553968	593311	196878	414204	648954	12.8	5.2	8.4	11.6	-1.2	0.06	1.1	0.4	1.2	0.1	1.3	0.003	1.5	0.01	1.1	0.2	0.0003
Q$248	D3Z3K1	D3Z3K1_MOUSE	Gm10288	MCG11809	1	25.84	6	10331883	7503040	11104189	21408347	2056079	1244078	1814497	7710157	44.5	37.1	36.5	80.5	-1.4	0.6	1.1	0.8	2.1	0.6	1.5	0.6	2.9	0.6	1.9	0.6	0.1
Q$808	O70404	VAMP8_MOUSE	Vamp8	Vesicle-associated membrane protein 8	1	52.48	4	10324849	8880923	8787525	12303447	848764	1478202	1006659	1061537	18.4	37.2	25.6	19.3	-1.2	0.7	-1.2	0.6	1.2	0.6	-1	1	1.4	0.4	1.4	0.2	0.1
Q$1188	P62307	RUXF_MOUSE	Snrpf	Small nuclear ribonucleoprotein F	1	65.12	3	10276576	8789653	14141706	13818985	1756630	1430453	1247361	960696	38.2	36.4	19.7	15.5	-1.2	0.8	1.4	0.4	1.3	0.4	1.6	0.1	1.6	0.1	-1	0.8	0.03
Q$1424	Q60865	CAPR1_MOUSE	Caprin1	Caprin-1	1	14.71	7	10262110	8201207	11836242	13702465	1751468	1102544	1279107	784356	38.2	30.1	24.2	12.8	-1.3	0.6	1.2	0.6	1.3	0.4	1.4	0.3	1.7	0.02	1.2	0.6	0.05
Q$2012	Q9JHU4	DYHC1_MOUSE	Dync1h1	Cytoplasmic dynein 1 heavy chain 1	1	4.22	11	10234179	8016244	12285655	14001812	1313894	725309	624261	880573	28.7	20.2	11.4	14.1	-1.3	0.4	1.2	0.4	1.4	0.2	1.5	0.01	1.7	0.005	1.1	0.4	0.002
Q$1619	Q8BLN5	ERG7_MOUSE	Lss	Lanosterol synthase	1	12.14	6	10203800	8385502	9251747	9597650	1171576	972719	1148531	914955	25.7	25.9	27.8	21.3	-1.2	0.8	-1.1	1	-1.1	1	1.1	1	1.1	0.9	1	1	0.7
Q$1481	Q62318	TIF1B_MOUSE	Trim28	Transcription intermediary factor 1-beta	1	14.99	8	10182851	8601272	11034554	15039231	1446684	764965	929407	1836189	31.8	19.9	18.8	27.3	-1.2	0.6	1.1	0.6	1.5	0.3	1.3	0.3	1.7	0.07	1.4	0.3	0.02
Q$1561	Q7TMA2-2	ZN503_MOUSE	Znf50	Isoform 2 of Zinc finger protein 503	0.9952	15.76	2	10169940	8521800	26845310	29927190	720329	1271770	14223386	14205473	15.8	33.4	118.5	106.1	-1.2	0.8	2.6	0.8	2.9	0.8	3.2	0.8	3.5	0.8	1.1	0.9	0.3
Q$1646	Q8C2Q8	Q8C2Q8_MOUSE	Atp5c1	ATP synthase subunit gamma	1	39.05	10	10168498	8940328	10525906	14368281	1714768	1811885	1790923	3776359	37.7	45.3	38	58.8	-1.1	0.9	1	0.9	1.4	0.9	1.2	0.9	1.6	0.8	1.4	0.9	0.4
Q$1351	Q3TML0	Q3TML0_MOUSE	Pdia6	Protein disulfide-isomerase A6	1	22.02	5	10116635	8095340	10354897	10398111	1307139	844307	898861	836550	28.9	23.3	19.4	18	-1.2	0.6	1	1	1	1	1.3	0.4	1.3	0.4	1	1	0.3
Q$1462	Q61753	SERA_MOUSE	Phgdh	D-3-phosphoglycerate dehydrogenase	1	25.14	9	10087366	7265664	11327934	15932603	1987452	1135352	1241239	951248	44.1	34.9	24.5	13.4	-1.4	0.4	1.1	0.6	1.6	0.1	1.6	0.1	2.2	0.002	1.4	0.09	0.004
Q$887	Q3THW5	H2AV_MOUSE	H2afv	Histone H2A.V	1	46.88	6	10069517	8667581	9750214	14368050	1233122	800688	897531	3917540	27.4	20.7	20.6	61	-1.2	0.8	-1	0.8	1.4	0.8	1.1	0.8	1.7	0.8	1.5	0.8	0.3
Q$1757	Q920E5	FPPS_MOUSE	Fdps	Farnesyl pyrophosphate synthase	1	25.21	7	10064955	7215397	10985418	15638903	1612543	946442	1141101	1570635	35.8	29.3	23.2	22.5	-1.4	0.3	1.1	0.7	1.6	0.2	1.5	0.2	2.2	0.01	1.4	0.2	0.004
Q$709	H3BKH6	H3BKH6_MOUSE	Esd	S-formylglutathione hydrolase	1	58.64	14	10041438	8169965	11006134	15718252	1622002	827969	851611	1477674	36.1	22.7	17.3	21	-1.2	0.6	1.1	0.6	1.6	0.1	1.3	0.1	1.9	0.01	1.4	0.1	0.004
Q$1045	P35550	FBRL_MOUSE	Fbl	rRNA 2'-O-methyltransferase fibrillarin	1	35.47	7	10038506	8617708	10916148	14016876	1575588	731965	823610	1154359	35.1	19	16.9	18.4	-1.2	0.7	1.1	0.7	1.4	0.3	1.3	0.3	1.6	0.03	1.3	0.3	0.02
Q$1004	P27048	RSMB_MOUSE	Snrpb	Small nuclear ribonucleoprotein-associated protein B	1	19.48	5	10024787	8792016	10959695	12452571	1183252	877095	641928	976184	26.4	22.3	13.1	17.5	-1.1	0.7	1.1	0.7	1.2	0.5	1.2	0.3	1.4	0.1	1.1	0.6	0.08
Q$513	Q9EQK5	MVP_MOUSE	Mvp	Major vault protein	1	23.11	12	10009876	7752722	10849874	12797494	1278515	891611	450879	852907	28.6	25.7	9.3	14.9	-1.3	0.3	1.1	0.6	1.3	0.3	1.4	0.07	1.7	0.02	1.2	0.3	0.01
Q$989	P25444	RS2_MOUSE	Rps2	40S ribosomal protein S2	1	41.98	9	9998498	8278439	11837278	18234089	1123592	603397	1227585	2693890	25.1	16.3	23.2	33	-1.2	0.4	1.2	0.4	1.8	0.1	1.4	0.1	2.2	0.1	1.5	0.2	0.003
Q$767	O09061	PSB1_MOUSE	Psmb1	Proteasome subunit beta type-1	1	35	6	9997289	9517495	9518929	10663903	833765	789701	791065	757223	18.6	18.6	18.6	15.9	-1.1	1	-1.1	1	1.1	1	1	1	1.1	0.9	1.1	0.9	0.7
Q$1626	Q8BP47	SYNC_MOUSE	Nars	Asparagine--tRNA ligase, cytoplasmic	1	9.12	4	9972017	8490707	11538195	11136045	850620	831066	1063299	677550	19.1	21.9	20.6	13.6	-1.2	0.7	1.2	0.7	1.1	0.7	1.4	0.2	1.3	0.2	-1	0.8	0.1
Q$1092	P48678-2	LMNA_MOUSE	Lmn	Isoform C of Prelamin-A/C	1	27.7	13	9959119	9269190	10861643	14647386	1035141	903415	932566	1942316	23.2	21.8	19.2	29.7	-1.1	0.8	1.1	0.8	1.5	0.3	1.2	0.6	1.6	0.2	1.3	0.4	0.04
Q$1131	P54823	DDX6_MOUSE	Ddx6	Probable ATP-dependent RNA helicase DDX6	0.9999	11.8	3	9943008	6674951	12020311	15535261	2019688	792814	937519	1048409	45.4	26.6	17.4	15.1	-1.5	0.3	1.2	0.4	1.6	0.1	1.8	0.01	2.3	0.0009	1.3	0.1	0.002
Q$1309	Q00PI9	HNRL2_MOUSE	Hnrnpul2	Heterogeneous nuclear ribonucleoprotein U-like protein 2	1	13.96	6	9936147	8349871	11633400	14288623	2197773	852848	1129151	966145	49.5	22.8	21.7	15.1	-1.2	0.8	1.2	0.8	1.4	0.4	1.4	0.2	1.7	0.01	1.2	0.4	0.05
Q$34	A2AFJ1	A2AFJ1_MOUSE	Rbbp7	Histone-binding protein RBBP7	1	36.3	11	9894235	8028965	10394649	11972009	513359	193688	454326	698573	11.6	5.4	9.8	13	-1.2	0.04	1.1	0.5	1.2	0.1	1.3	0.008	1.5	0.02	1.2	0.2	0.0004
Q$891	P10518	HEM2_MOUSE	Alad	Delta-aminolevulinic acid dehydratase	1	45.45	8	9854895	7376911	13298841	18392647	2151703	1323211	1634629	1320376	48.8	40.1	27.5	16.1	-1.3	0.4	1.3	0.4	1.9	0.05	1.8	0.09	2.5	0.002	1.4	0.1	0.001
Q$2002	Q9ERS2	NDUAD_MOUSE	Ndufa13	NADH dehydrogenase [ubiquinone] 1 alpha subcomplex subunit 13	1	41.67	6	9826954	8694144	5668865	38862602	1792210	3897279	392464	22299385	40.8	100.2	15.5	128.3	-1.1	0.8	-1.7	0.4	4	0.7	-1.5	0.7	4.5	0.7	6.9	0.7	0.2
Q$807	O70252	HMOX2_MOUSE	Hmox2	Heme oxygenase 2	1	36.83	10	9814865	8069664	10238206	11623890	1694223	1413727	1436009	1432198	38.6	39.2	31.4	27.6	-1.2	0.9	1	0.9	1.2	0.9	1.3	0.8	1.4	0.5	1.1	0.9	0.4
Q$1409	Q5XJF6	Q5XJF6_MOUSE	Rpl10a	Ribosomal protein	1	34.56	6	9782937	7650838	11739650	14127859	1584795	905316	1679969	1234575	36.2	26.5	32	19.5	-1.3	0.6	1.2	0.6	1.4	0.3	1.5	0.3	1.8	0.02	1.2	0.6	0.03
Q$1402	Q5STT6	FA71B_MOUSE	Fam71b	Protein FAM71B	1	10.23	3	9724734	6122639	13039518	15784449	1908906	446353	813764	1418204	43.9	16.3	14	20.1	-1.6	0.3	1.3	0.3	1.6	0.1	2.1	0.0004	2.6	0.008	1.2	0.3	0.0004
Q$1869	Q9CR68	UCRI_MOUSE	Uqcrfs1	Cytochrome b-c1 complex subunit Rieske, mitochondrial	1	36.86	7	9667127	7797234	10273076	11071145	975571	934773	1423308	773314	22.6	26.8	31	15.6	-1.2	0.6	1.1	0.9	1.1	0.6	1.3	0.6	1.4	0.2	1.1	0.9	0.2
Q$266	D3Z659	D3Z659_MOUSE	Rps2-ps6	Uncharacterized protein	1	45.7	8	9660136	7965298	11477706	17733062	1115068	606029	1239454	2654731	25.8	17	24.1	33.5	-1.2	0.4	1.2	0.4	1.8	0.1	1.4	0.1	2.2	0.1	1.5	0.2	0.003
Q$284	D3Z7W7	D3Z7W7_MOUSE	Rps3a3	40S ribosomal protein S3a	1	31.44	9	9656246	7030028	11707619	15281685	1587783	728158	847279	947742	36.8	23.2	16.2	13.9	-1.4	0.3	1.2	0.3	1.6	0.06	1.7	0.02	2.2	0.0007	1.3	0.07	0.0005
Q$1467	Q61830	MRC1_MOUSE	Mrc1	Macrophage mannose receptor 1	0.9974	3.85	4	9482654	6902611	11677885	14558705	1278145	807119	906908	1492207	30.1	26.1	17.4	22.9	-1.4	0.3	1.2	0.3	1.5	0.1	1.7	0.02	2.1	0.01	1.2	0.3	0.002
Q$46	A2AKU9	A2AKU9_MOUSE	Atp5c1	ATP synthase subunit gamma	1	36.03	9	9458946	8315613	9833327	13687293	1566981	1652749	1638955	3705135	37	44.4	37.3	60.5	-1.1	0.9	1	0.9	1.4	0.9	1.2	0.9	1.6	0.8	1.4	0.9	0.4
Q$1121	P53026	RL10A_MOUSE	Rpl10a	60S ribosomal protein L10a	1	27.19	5	9447285	7418662	11432202	13746135	1577940	904324	1626032	1231383	37.3	27.3	31.8	20	-1.3	0.6	1.2	0.6	1.5	0.3	1.5	0.3	1.9	0.02	1.2	0.6	0.03
Q$1883	Q9CX86	ROA0_MOUSE	Hnrnpa0	Heterogeneous nuclear ribonucleoprotein A0	1	29.51	6	9437654	6704277	10102318	12244888	1096893	604848	558612	716911	26	20.2	12.4	13.1	-1.4	0.2	1.1	0.6	1.3	0.2	1.5	0.02	1.8	0.002	1.2	0.2	0.001
Q$988	P25206	MCM3_MOUSE	Mcm3	DNA replication licensing factor MCM3	1	11.45	7	9367060	7494287	9461344	14271178	1706811	1197981	1003479	1241327	40.7	35.7	23.7	19.4	-1.2	0.6	1	1	1.5	0.2	1.3	0.6	1.9	0.03	1.5	0.08	0.01
Q$1576	Q80X72	LRC15_MOUSE	Lrrc15	Leucine-rich repeat-containing protein 15	0.9967	2.76	2	9356153	7538308	8192972	14426250	2056699	1072821	1066604	3444093	49.2	31.8	29.1	53.4	-1.2	0.8	-1.1	0.9	1.5	0.7	1.1	0.9	1.9	0.5	1.8	0.5	0.1
Q$1209	P62855	RS26_MOUSE	Rps26	40S ribosomal protein S26	1	7.83	1	9345030	5654890	11019910	13633530	1850934	701244	771597	2124660	44.3	27.7	15.7	34.8	-1.7	0.3	1.2	0.5	1.5	0.4	1.9	0.005	2.4	0.04	1.2	0.5	0.01
Q$1904	Q9CZW5	TOM70_MOUSE	Tomm70a	Mitochondrial import receptor subunit TOM70	1	4.26	2	9308139	9335473	7815509	8474044	1295314	1279560	730440	754229	31.1	30.6	20.9	19.9	1	1	-1.2	0.9	-1.1	1	-1.2	0.9	-1.1	1	1.1	1	0.7
Q$38	A2AFS1	A2AFS1_MOUSE	Sars	Serine--tRNA ligase, cytoplasmic (Fragment)	0.9119	4.28	1	9255825	8725550	6930500	7332925	755923	651334	534482	416716	18.3	16.7	17.2	12.7	-1.1	0.8	-1.3	0.2	-1.3	0.3	-1.3	0.3	-1.2	0.3	1.1	0.8	0.04
Q$1196	P62717	RL18A_MOUSE	Rpl18a	60S ribosomal protein L18a	1	36.36	6	9182785	6620415	10773126	12929077	1742824	634389	1104140	1042854	42.4	21.4	22.9	18	-1.4	0.5	1.2	0.5	1.4	0.4	1.6	0.06	2	0.005	1.2	0.5	0.01
Q$1411	Q60597-2	ODO1_MOUSE	Ogd	Isoform 2 of 2-oxoglutarate dehydrogenase, mitochondrial	1	18.95	13	9170819	6532077	10581755	13215422	1253354	666337	659357	890679	30.6	22.8	13.9	15.1	-1.4	0.2	1.2	0.3	1.4	0.1	1.6	0.01	2	0.002	1.2	0.1	0.0007
Q$757	O08749	DLDH_MOUSE	Dld	Dihydrolipoyl dehydrogenase, mitochondrial	1	22.4	7	9093106	7522330	8749297	9257325	1244557	755271	860778	482618	30.6	22.5	22	11.7	-1.2	0.8	-1	1	1	1	1.2	0.8	1.2	0.4	1.1	0.9	0.5
Q$787	O35685	NUDC_MOUSE	Nudc	Nuclear migration protein nudC	1	6.02	2	9063555	6767751	10303740	11232810	1891137	836989	1034139	1412887	46.7	27.7	22.4	28.1	-1.3	0.8	1.1	0.8	1.2	0.8	1.5	0.1	1.7	0.1	1.1	0.8	0.1
Q$776	O35286	DHX15_MOUSE	Dhx15	Putative pre-mRNA-splicing factor ATP-dependent RNA helicase DHX15	1	14.59	8	9057815	7597397	9236097	12145684	1610543	1029061	965690	1362599	39.8	30.3	23.4	25.1	-1.2	0.7	1	0.9	1.3	0.6	1.2	0.6	1.6	0.2	1.3	0.5	0.1
Q$1455	Q61598-2	GDIB_MOUSE	Gdi	Isoform 2 of Rab GDP dissociation inhibitor beta	1	37.9	14	9049460	6732574	10109047	11990814	1130353	334447	533668	815248	27.9	11.1	11.8	15.2	-1.3	0.2	1.1	0.4	1.3	0.2	1.5	0.003	1.8	0.002	1.2	0.2	0.002
Q$1859	Q9CQU0	TXD12_MOUSE	Txndc12	Thioredoxin domain-containing protein 12	1	40	5	9039046	5597490	8242805	14127118	1771867	770738	840313	2177210	43.8	30.8	22.8	34.5	-1.6	0.3	-1.1	0.7	1.6	0.3	1.5	0.2	2.5	0.04	1.7	0.2	0.008
Q$1937	Q9D554	SF3A3_MOUSE	Sf3a3	Splicing factor 3A subunit 3	1	19.16	5	9016057	7760795	9506284	10612048	838610	959597	675795	717715	20.8	27.6	15.9	15.1	-1.2	0.6	1.1	0.7	1.2	0.6	1.2	0.6	1.4	0.2	1.1	0.6	0.1
Q$1113	P51660	DHB4_MOUSE	Hsd17b4	Peroxisomal multifunctional enzyme type 2	1	17.82	9	8988396	7107015	10534743	12902951	1001712	709369	894031	1573094	24.9	22.3	19	27.3	-1.3	0.4	1.2	0.4	1.4	0.2	1.5	0.08	1.8	0.06	1.2	0.4	0.01
Q$1470	Q61897	KT33B_MOUSE	Krt33b	Keratin, type I cuticular Ha3-II	1	17.08	8	8977425	11558558	7334162	76025338	932197	5208499	670679	57011501	23.2	100.8	20.4	167.7	1.3	0.8	-1.2	0.7	8.5	0.8	-1.6	0.8	6.6	0.8	10.4	0.8	0.3
Q$1982	Q9DCH4	EIF3F_MOUSE	Eif3f	Eukaryotic translation initiation factor 3 subunit F	1	26.32	5	8947746	6732806	11819597	12315748	950230	580512	884724	879080	23.7	19.3	16.7	16	-1.3	0.2	1.3	0.2	1.4	0.1	1.8	0.007	1.8	0.004	1	0.7	0.0007
Q$677	G3X8T3	G3X8T3_MOUSE	Ctsa	Lysosomal protective protein	1	21.75	6	8943138	8620598	8843087	13279902	1144339	802427	1054802	4021269	28.6	20.8	26.7	67.7	-1	1	-1	1	1.5	0.9	1	1	1.5	0.9	1.5	0.9	0.4
Q$33	A2AFI9	A2AFI9_MOUSE	Rbbp7	Histone-binding protein RBBP7	1	40.16	10	8924899	7335682	9502133	10688586	403530	281403	496834	682304	10.1	8.6	11.7	14.3	-1.2	0.05	1.1	0.4	1.2	0.2	1.3	0.03	1.5	0.01	1.1	0.4	0.002
Q$688	G3XA48	G3XA48_MOUSE	Idi1	Isopentenyl-diphosphate Delta-isomerase 1	1	37.1	9	8921333	7222797	11129919	13275370	1444910	776356	785434	768728	36.2	24	15.8	12.9	-1.2	0.4	1.2	0.4	1.5	0.1	1.5	0.04	1.8	0.003	1.2	0.2	0.003
Q$1106	P50516	VATA_MOUSE	Atp6v1a	V-type proton ATPase catalytic subunit A	1	28.53	16	8876744	7559849	10981132	12792711	962220	692861	1695535	1116798	24.2	20.5	34.5	19.5	-1.2	0.7	1.2	0.7	1.4	0.1	1.5	0.3	1.7	0.02	1.2	0.7	0.03
Q$747	L7N240	L7N240_MOUSE	Gm6139	Protein Gm6139	1	31.22	6	8840218	7309963	10494300	16458048	1021086	563171	1208773	2669975	25.8	17.2	25.8	36.3	-1.2	0.4	1.2	0.4	1.9	0.1	1.4	0.2	2.3	0.1	1.6	0.2	0.005
Q$962	P19536	COX5B_MOUSE	Cox5b	Cytochrome c oxidase subunit 5B, mitochondrial	1	48.44	4	8824245	6345857	10121802	12472802	1406353	915522	857198	830980	35.6	32.3	18.9	14.9	-1.4	0.3	1.1	0.5	1.4	0.2	1.6	0.08	2	0.007	1.2	0.2	0.005
Q$2009	Q9JHF5	Q9JHF5_MOUSE	Tcirg1	A3 subunit of vacuolar-adenosine triphosphatase	0.9999	9.59	4	8815909	7991662	9934232	10095346	893981	828763	976825	1095789	22.7	23.2	22	24.3	-1.1	0.9	1.1	0.9	1.1	0.9	1.2	0.7	1.3	0.7	1	0.9	0.4
Q$718	H3BLK8	H3BLK8_MOUSE	Zfhx4	Zinc finger homeobox protein 4	0.971	1.41	1	8806650	8294320	8805750	8279930	322142	531376	474230	634251	8.2	14.3	12	17.1	-1.1	1	-1	1	-1.1	1	1.1	1	-1	1	-1.1	1	0.8
Q$1802	Q99L13	3HIDH_MOUSE	Hibadh	3-hydroxyisobutyrate dehydrogenase, mitochondrial	1	18.51	4	8794965	6783747	10722927	15192603	2305302	1615838	1759949	1592565	58.6	53.3	36.7	23.4	-1.3	0.7	1.2	0.7	1.7	0.2	1.6	0.4	2.2	0.04	1.4	0.3	0.03
Q$1386	Q3UV17	K22O_MOUSE	Krt76	Keratin, type II cytoskeletal 2 oral	1	4.21	3	8780530	12752396	17928734	15403647	1719532	4340204	7084162	4954712	43.8	76.1	88.4	71.9	1.5	0.9	2	0.8	1.8	0.8	1.4	0.9	1.2	0.9	-1.2	0.9	0.6
Q$1215	P62911	RL32_MOUSE	Rpl32	60S ribosomal protein L32	1	28.15	5	8769899	7265873	10810754	16372567	1144315	763096	1557820	3116070	29.2	23.5	32.2	42.6	-1.2	0.5	1.2	0.5	1.9	0.2	1.5	0.3	2.3	0.2	1.5	0.4	0.02
Q$107	B1AQ75	KRT36_MOUSE	Krt36	Keratin, type I cuticular Ha6	1	13.11	5	8766582	7927603	8515363	17671377	1023235	533442	737666	7256266	26.1	15	19.4	91.8	-1.1	0.9	-1	0.9	2	0.8	1.1	0.9	2.2	0.8	2.1	0.8	0.2
Q$1758	Q921F2	TADBP_MOUSE	Tardbp	TAR DNA-binding protein 43	1	39.37	9	8757472	5694736	10167783	12603283	1696631	856760	991663	860134	43.3	33.6	21.8	15.3	-1.5	0.3	1.2	0.5	1.4	0.3	1.8	0.05	2.2	0.003	1.2	0.3	0.005
Q$1524	Q6NS46	RRP5_MOUSE	Pdcd11	Protein RRP5 homolog	0.9998	3.01	4	8729033	7504358	8189952	9711235	1638109	1479602	885912	854045	42	44.1	24.2	19.7	-1.2	1	-1.1	1	1.1	1	1.1	1	1.3	0.8	1.2	0.8	0.7
Q$1930	Q9D1R9	RL34_MOUSE	Rpl34	60S ribosomal protein L34	1	14.53	2	8713067	6772265	10300814	12697924	990085	401738	818904	1140576	25.4	13.3	17.8	20.1	-1.3	0.3	1.2	0.3	1.5	0.1	1.5	0.02	1.9	0.007	1.2	0.3	0.002
Q$1358	Q3TWW8	Q3TWW8_MOUSE	Srsf6	Protein Srsf6	1	7.37	3	8694213	7138956	9220237	10339723	961367	790733	873742	911993	24.7	24.8	21.2	19.7	-1.2	0.7	1.1	0.7	1.2	0.7	1.3	0.5	1.4	0.2	1.1	0.7	0.1
Q$1034	P34022	RANG_MOUSE	Ranbp1	Ran-specific GTPase-activating protein	1	42.36	8	8661864	8286801	9649739	14287988	1372060	2473410	801168	1793347	35.4	66.7	18.6	28.1	-1	0.9	1.1	0.9	1.6	0.2	1.2	0.9	1.7	0.3	1.5	0.2	0.09
Q$1016	Q9CPX4	Q9CPX4_MOUSE	Ftl1	Ferritin	1	52.46	10	8626222	7392947	9384041	10646753	1291603	328284	1184445	1003611	33.5	9.9	28.2	21.1	-1.2	0.8	1.1	0.8	1.2	0.7	1.3	0.6	1.4	0.09	1.1	0.8	0.2
Q$633	F8WIT2	F8WIT2_MOUSE	Anxa6	Annexin	1	18.89	9	8618962	7011774	10197928	12068340	1247948	655258	1350862	1997342	32.4	20.9	29.6	37	-1.2	0.6	1.2	0.7	1.4	0.6	1.5	0.3	1.7	0.2	1.2	0.7	0.1
Q$662	G3UY93	G3UY93_MOUSE	Vars	Valine--tRNA ligase (Fragment)	1	8.37	6	8618704	8268663	7488125	20365111	1506260	1512000	967911	6845055	39.1	40.9	28.9	75.2	-1	0.9	-1.2	0.9	2.4	0.6	-1.1	0.9	2.5	0.6	2.7	0.6	0.07
Q$930	P15119	MCPT2_MOUSE	Mcpt2	Mast cell protease 2	1	40.98	8	8591108	7641686	9295667	13848012	1180097	1009393	920305	1155240	30.7	29.5	22.1	18.7	-1.1	0.8	1.1	0.8	1.6	0.06	1.2	0.6	1.8	0.02	1.5	0.06	0.004
Q$1726	Q8VED5	K2C79_MOUSE	Krt79	Keratin, type II cytoskeletal 79	1	6.4	4	8574094	10770555	9513443	8780800	2396198	3865972	4802444	1872241	62.5	80.3	112.9	47.7	1.3	1	1.1	1	1	1	-1.1	1	-1.2	1	-1.1	1	1
Q$1764	Q922F4	TBB6_MOUSE	Tubb6	Tubulin beta-6 chain	1	15.44	5	8508810	5556919	9429132	12516812	1582736	793836	1122988	1116142	41.6	31.9	26.6	19.9	-1.5	0.3	1.1	0.6	1.5	0.3	1.7	0.1	2.3	0.006	1.3	0.3	0.007
Q$1594	Q8BGJ5	Q8BGJ5_MOUSE	Ptbp1	MCG13402, isoform CRA_a	1	43.86	15	8507917	6396269	10689033	12473127	1528409	829397	1086244	517602	40.2	29	22.7	9.3	-1.3	0.5	1.3	0.5	1.5	0.1	1.7	0.07	2	0.002	1.2	0.4	0.005
Q$155	D3YTQ3	D3YTQ3_MOUSE	Hnrnpdl	Heterogeneous nuclear ribonucleoprotein D-like	1	3.81	2	8486873	6911751	9401726	15194172	1086020	700769	611097	2246714	28.6	22.7	14.5	33.1	-1.2	0.4	1.1	0.5	1.8	0.1	1.4	0.1	2.2	0.1	1.6	0.2	0.003
Q$1119	P52825	CPT2_MOUSE	Cpt2	Carnitine O-palmitoyltransferase 2, mitochondrial	0.9988	9.12	4	8460676	6351257	11215101	12749610	1991919	1374711	1320966	1020605	52.6	48.4	26.3	17.9	-1.3	0.6	1.3	0.6	1.5	0.3	1.8	0.2	2	0.03	1.1	0.6	0.03
Q$1335	Q20BD0	Q20BD0_MOUSE	Hnrnpab	Heterogeneous nuclear ribonucleoprotein A/B	1	29.22	10	8452172	5905914	11354519	17763838	1421166	739240	890344	3748143	37.6	28	17.5	47.2	-1.4	0.3	1.3	0.3	2.1	0.2	1.9	0.009	3	0.2	1.6	0.3	0.006
Q$202	D3YXU1	D3YXU1_MOUSE	Hadhb	Trifunctional enzyme subunit beta, mitochondrial (Fragment)	1	20.81	3	8403390	5804061	8850749	10650102	1880726	1196735	1560233	1273813	50	46.1	39.4	26.7	-1.4	0.7	1.1	0.9	1.3	0.7	1.5	0.6	1.8	0.1	1.2	0.7	0.2
Q$1390	Q3V086	Q3V086_MOUSE	Ddx4	DEAD box polypeptide 4	1	2.2	1	8390300	6586200	8990800	8783400	874571	657708	764356	666199	23.3	22.3	19	17	-1.3	0.4	1.1	0.9	1	0.9	1.4	0.2	1.3	0.2	-1	0.9	0.1
Q$2043	Q9QYJ0	DNJA2_MOUSE	Dnaja2	DnaJ homolog subfamily A member 2	1	26.21	5	8348711	6260715	9258080	9688782	1528195	797390	1162936	705727	40.9	28.5	28.1	16.3	-1.3	0.7	1.1	0.9	1.2	0.8	1.5	0.3	1.5	0.07	1	0.9	0.2
Q$1155	P60766	CDC42_MOUSE	Cdc42	Cell division control protein 42 homolog	1	33.51	4	8329442	5681331	10049877	12293679	1463763	553727	751272	889549	39.3	21.8	16.7	16.2	-1.5	0.2	1.2	0.3	1.5	0.2	1.8	0.008	2.2	0.001	1.2	0.2	0.002
Q$120	B1AU25	B1AU25_MOUSE	Aifm1	Apoptosis-inducing factor 1, mitochondrial	1	27.96	12	8311228	6533966	9108047	11953848	1098623	817312	867218	1051524	29.6	28	21.3	19.7	-1.3	0.4	1.1	0.6	1.4	0.2	1.4	0.2	1.8	0.02	1.3	0.2	0.009
Q$790	O35744	CH3L3_MOUSE	Chi3l3	Chitinase-3-like protein 3	1	19.85	6	8186375	7740638	10591527	11129105	1344106	387877	1012264	956639	36.7	11.2	21.4	19.2	-1.1	0.9	1.3	0.5	1.4	0.4	1.4	0.1	1.4	0.07	1.1	0.9	0.06
Q$23	A2ACG7	A2ACG7_MOUSE	Rpn2	Dolichyl-diphosphooligosaccharide--protein glycosyltransferase subunit 2	1	33.5	13	8153955	6922546	9044574	10868562	609236	593482	753756	996201	16.7	19.2	18.6	20.5	-1.2	0.5	1.1	0.5	1.3	0.2	1.3	0.2	1.6	0.05	1.2	0.5	0.01
Q$2054	Q9R0P5	DEST_MOUSE	Dstn	Destrin	1	36.97	5	8131778	5759390	9559034	11330140	1306657	371778	453655	806979	35.9	14.4	10.6	15.9	-1.4	0.3	1.2	0.3	1.4	0.3	1.7	0.001	2	0.001	1.2	0.3	0.002
Q$1365	Q3U741	Q3U741_MOUSE	Ddx17	DEAD (Asp-Glu-Ala-Asp) box polypeptide 17, isoform CRA_a	1	21.47	12	8088898	7127690	9613790	12174343	1315424	1330700	1700291	1265483	36.4	41.7	39.5	23.2	-1.1	0.7	1.2	0.7	1.5	0.2	1.3	0.7	1.7	0.1	1.3	0.7	0.1
Q$603	F6YTZ4	F6YTZ4_MOUSE	Gm6576	Uncharacterized protein	1	31.02	7	8058156	6486342	9723236	15495805	951365	437549	1100121	2760798	26.4	15.1	25.3	39.8	-1.2	0.3	1.2	0.3	1.9	0.1	1.5	0.1	2.4	0.1	1.6	0.2	0.005
Q$1542	Q8R0B4	Q8R0B4_MOUSE	Tardbp	MCG16669, isoform CRA_a	1	49.15	7	8025739	5087089	9307003	11565658	1613064	819328	990449	866558	44.9	36	23.8	16.8	-1.6	0.3	1.2	0.5	1.4	0.3	1.8	0.05	2.3	0.004	1.2	0.3	0.007
Q$1102	P49722	PSA2_MOUSE	Psma2	Proteasome subunit alpha type-2	1	58.12	8	7998661	6669052	8564787	9761831	1163791	518349	537347	415994	32.5	17.4	14	9.5	-1.2	0.5	1.1	0.7	1.2	0.5	1.3	0.2	1.5	0.01	1.1	0.4	0.05
Q$705	H3BJZ9	H3BJZ9_MOUSE	Acaa1a	3-ketoacyl-CoA thiolase A, peroxisomal	1	38.07	9	7976458	6286778	7805562	8993198	996400	367779	452279	774780	27.9	13.1	13	19.3	-1.3	0.5	-1	0.9	1.1	0.7	1.2	0.1	1.4	0.08	1.2	0.5	0.09
Q$1752	Q91YR9	PTGR1_MOUSE	Ptgr1	Prostaglandin reductase 1	1	22.8	4	7938482	6477918	8623192	10009530	1430994	992371	1151280	1077486	40.3	34.3	29.9	24.1	-1.2	0.8	1.1	0.8	1.3	0.7	1.3	0.7	1.5	0.2	1.2	0.8	0.2
Q$1256	P70315	WASP_MOUSE	Was	Wiskott-Aldrich syndrome protein homolog	1	18.08	4	7934196	5681163	10524512	12011806	1530928	476116	836663	1387945	43.1	18.7	17.8	25.8	-1.4	0.4	1.3	0.4	1.5	0.3	1.9	0.006	2.1	0.01	1.1	0.4	0.006
Q$1096	P49312-2	ROA1_MOUSE	Hnrnpa	Isoform Short of Heterogeneous nuclear ribonucleoprotein A1	1	39.93	11	7901587	6031909	11039619	13705492	1234298	897974	1052440	935780	34.9	33.3	21.3	15.3	-1.3	0.3	1.4	0.2	1.7	0.03	1.8	0.03	2.3	0.002	1.2	0.2	0.0004
Q$1350	Q3TLP8	Q3TLP8_MOUSE	Rac1	RAS-related C3 botulinum substrate 1, isoform CRA_a	1	16.11	4	7887818	6441338	7084639	26749915	1093559	1595304	303390	13658290	31	55.4	9.6	114.2	-1.2	0.9	-1.1	0.9	3.4	0.8	1.1	0.9	4.2	0.8	3.8	0.8	0.2
Q$1578	Q80XR6	Q80XR6_MOUSE	Hnrnpab	Heterogeneous nuclear ribonucleoprotein A/B	1	25.4	9	7877687	5612595	10670088	17190852	1249158	716074	771542	3702983	35.5	28.5	16.2	48.2	-1.4	0.3	1.4	0.3	2.2	0.2	1.9	0.008	3.1	0.2	1.6	0.3	0.006
Q$1283	P97310	MCM2_MOUSE	Mcm2	DNA replication licensing factor MCM2	1	16.04	10	7869200	6029157	8398205	11073900	1754998	1071242	1112225	1334694	49.9	39.7	29.6	27	-1.3	0.6	1.1	0.8	1.4	0.6	1.4	0.6	1.8	0.1	1.3	0.6	0.1
Q$1926	Q9D1K2	VATF_MOUSE	Atp6v1f	V-type proton ATPase subunit F	1	20.17	2	7850520	6091330	9040630	9702850	755191	760781	618124	734757	21.5	27.9	15.3	16.9	-1.3	0.4	1.2	0.4	1.2	0.4	1.5	0.08	1.6	0.05	1.1	0.5	0.01
Q$1974	Q9DC51	GNAI3_MOUSE	Gnai3	Guanine nucleotide-binding protein G(k) subunit alpha	1	14.69	5	7794587	6248817	9443232	11213340	1455560	583040	1207239	984238	41.8	20.9	28.6	19.6	-1.2	0.6	1.2	0.6	1.4	0.3	1.5	0.2	1.8	0.01	1.2	0.6	0.03
Q$660	P97371	PSME1_MOUSE	Psme1	Proteasome activator complex subunit 1	1	29.72	5	7735830	5980977	8659831	11194350	1151580	772566	630379	860002	33.3	28.9	16.3	17.2	-1.3	0.4	1.1	0.5	1.4	0.2	1.4	0.1	1.9	0.01	1.3	0.2	0.005
Q$24	A2AD25	A2AD25_MOUSE	Gm4987	MCG49690	1	22.22	4	7731198	6637752	9426411	14388139	897713	717360	1231224	2865070	26	24.2	29.2	44.5	-1.2	0.5	1.2	0.5	1.9	0.3	1.4	0.3	2.2	0.3	1.5	0.4	0.02
Q$632	F8WIN2	F8WIN2_MOUSE	Arid3b	AT-rich interactive domain-containing protein 3B	0.9321	9.89	1	7706190	6333160	4333670	6524035	1210753	868165	144801	1070030	35.1	30.7	7.5	36.7	-1.2	0.8	-1.8	0.3	-1.2	0.8	-1.5	0.3	1	0.9	1.5	0.4	0.1
Q$1771	Q922U2	K2C5_MOUSE	Krt5	Keratin, type II cytoskeletal 5	1	14.83	5	7696837	6388322	8160064	11213087	1797033	1594183	1586399	1472089	52.2	55.8	43.5	29.4	-1.2	0.8	1.1	0.9	1.5	0.6	1.3	0.8	1.8	0.3	1.4	0.6	0.2
Q$1725	Q8VEB4	PAG15_MOUSE	Pla2g15	Group XV phospholipase A2	0.981	9.71	3	7664298	4849627	8859820	9894449	1980056	469269	1300851	503946	57.8	21.6	32.8	11.4	-1.6	0.7	1.2	0.7	1.3	0.7	1.8	0.1	2	0.0005	1.1	0.7	0.06
Q$916	P13634	CAH1_MOUSE	Ca1	Carbonic anhydrase 1	1	43.68	6	7662624	6315791	9472626	11263799	1043331	702844	497328	922531	30.4	24.9	11.7	18.3	-1.2	0.3	1.2	0.3	1.5	0.1	1.5	0.03	1.8	0.02	1.2	0.3	0.003
Q$76	A2AVJ7	A2AVJ7_MOUSE	Rrbp1	Ribosome-binding protein 1	1	7.31	8	7656859	6295009	7882693	8289759	795911	670428	657134	580448	23.2	23.8	18.6	15.7	-1.2	0.6	1	0.9	1.1	0.9	1.3	0.5	1.3	0.3	1.1	0.9	0.2
Q$1251	P68510	1433F_MOUSE	Ywhah	14-3-3 protein eta	1	41.46	7	7566204	6614923	7314952	9386723	960646	576472	645641	929045	28.4	19.5	19.7	22.1	-1.1	0.8	-1	0.8	1.2	0.6	1.1	0.8	1.4	0.2	1.3	0.4	0.1
Q$2028	Q9QUH0	GLRX1_MOUSE	Glrx	Glutaredoxin-1	1	70.09	5	7564361	6320709	8745331	10709543	803271	350083	819038	388879	23.7	12.4	20.9	8.1	-1.2	0.3	1.2	0.3	1.4	0.04	1.4	0.1	1.7	0.0002	1.2	0.2	0.001
Q$886	P09671	SODM_MOUSE	Sod2	Superoxide dismutase [Mn], mitochondrial	1	39.64	4	7550289	6589955	8710695	10001507	961530	709276	1117579	1388108	28.5	24.1	28.7	31	-1.1	0.8	1.2	0.8	1.3	0.6	1.3	0.6	1.5	0.3	1.1	0.8	0.2
Q$457	E9PW66	E9PW66_MOUSE	Nap1l1	Nucleosome assembly protein 1-like 1	1	40.43	9	7542090	5525815	8270902	11216055	1215174	664955	712360	706080	36	26.9	19.3	14.1	-1.4	0.3	1.1	0.6	1.5	0.09	1.5	0.09	2	0.002	1.4	0.09	0.002
Q$1812	Q99LX8	OST4_MOUSE	Ost4	Dolichyl-diphosphooligosaccharide--protein glycosyltransferase subunit 4	0.9767	100	1	7539880	7440470	8273950	7758550	262450	730323	672539	582619	7.8	21.9	18.2	16.8	-1	1	1.1	0.9	1	1	1.1	0.9	1	1	-1.1	1	0.8
Q$1698	Q8R1B4	EIF3C_MOUSE	Eif3c	Eukaryotic translation initiation factor 3 subunit C	1	5.82	4	7518390	5867408	8144522	9838466	1455673	1041069	1026219	926045	43.3	39.7	28.2	21	-1.3	0.6	1.1	0.7	1.3	0.6	1.4	0.6	1.7	0.1	1.2	0.6	0.1
Q$2080	Q9WV32	ARC1B_MOUSE	Arpc1b	Actin-related protein 2/3 complex subunit 1B	1	22.58	7	7500888	6494945	7955730	9632528	1484882	640604	754808	755935	44.3	22.1	21.2	17.5	-1.2	0.8	1.1	0.8	1.3	0.6	1.2	0.6	1.5	0.08	1.2	0.6	0.2
Q$126	B1AWH6	B1AWH6_MOUSE	Smc2	Structural maintenance of chromosomes protein 2 (Fragment)	1	4.67	2	7436830	6772050	8620430	6196470	1422154	729018	1776613	1248282	42.8	24.1	46.1	45	-1.1	1	1.2	1	-1.2	1	1.3	0.9	-1.1	1	-1.4	0.9	0.6
Q$1289	P97369	NCF4_MOUSE	Ncf4	Neutrophil cytosol factor 4	1	32.45	8	7413888	6275818	7999736	8932575	875855	529810	593560	624636	26.4	18.9	16.6	15.6	-1.2	0.7	1.1	0.7	1.2	0.6	1.3	0.3	1.4	0.07	1.1	0.7	0.08
Q$980	P23116	EIF3A_MOUSE	Eif3a	Eukaryotic translation initiation factor 3 subunit A	1	6.18	6	7413702	5118850	9329913	13832866	1452475	410299	641047	775818	43.8	17.9	15.4	12.5	-1.4	0.3	1.3	0.3	1.9	0.01	1.8	0.003	2.7	5e-05	1.5	0.008	4e-05
Q$43	O08810	U5S1_MOUSE	Eftud2	116 kDa U5 small nuclear ribonucleoprotein component	1	16.89	12	7367705	5227734	8520160	10825119	1058296	546011	440027	350996	32.1	23.4	11.5	7.3	-1.4	0.2	1.2	0.3	1.5	0.04	1.6	0.008	2.1	0.0002	1.3	0.01	0.0002
Q$2046	Q9QZD9	EIF3I_MOUSE	Eif3i	Eukaryotic translation initiation factor 3 subunit I	1	18.15	3	7285824	6758005	8191287	8198581	468372	604050	525248	668858	14.4	20	14.3	18.2	-1.1	0.8	1.1	0.7	1.1	0.7	1.2	0.5	1.2	0.6	1	1	0.2
Q$731	J3QM94	J3QM94_MOUSE	Gm5070	Uncharacterized protein	1	19.13	5	7238238	5831006	8739830	14220791	858546	400826	1068567	2772358	26.5	15.4	27.3	43.6	-1.2	0.3	1.2	0.3	2	0.2	1.5	0.2	2.4	0.2	1.6	0.3	0.008
Q$2037	Q9QXT0	CNPY2_MOUSE	Cnpy2	Protein canopy homolog 2	0.9666	24.73	3	7229009	6594314	8344927	8246514	714094	179988	653374	974184	22.1	6.1	17.5	26.4	-1.1	0.8	1.2	0.7	1.1	0.8	1.3	0.3	1.3	0.6	-1	0.9	0.3
Q$1464	Q61781	K1C14_MOUSE	Krt14	Keratin, type I cytoskeletal 14	1	34.5	9	7228548	6762078	10395166	11899413	1231458	1074620	945909	872879	38.1	35.5	20.3	16.4	-1.1	0.8	1.4	0.2	1.6	0.07	1.5	0.1	1.8	0.04	1.1	0.5	0.008
Q$591	F6WR04	F6WR04_MOUSE	Ctss	Cathepsin S	1	51.61	13	7222756	5897040	8238738	9142049	1238424	533604	651275	648474	38.3	20.2	17.7	15.9	-1.2	0.7	1.1	0.7	1.3	0.6	1.4	0.1	1.6	0.03	1.1	0.7	0.07
Q$944	P17225	PTBP1_MOUSE	Ptbp1	Polypyrimidine tract-binding protein 1	1	40.42	12	7216929	5382534	9228410	10467164	1252063	666092	881352	323826	38.8	27.7	21.4	6.9	-1.3	0.5	1.3	0.5	1.5	0.2	1.7	0.04	1.9	0.0008	1.1	0.5	0.003
Q$1488	Q62426	CYTB_MOUSE	Cstb	Cystatin-B	1	21.43	2	7215021	4545634	7967904	11501922	1828804	763991	645637	800856	56.7	37.6	18.1	15.6	-1.6	0.4	1.1	0.7	1.6	0.2	1.8	0.04	2.5	0.001	1.4	0.04	0.004
Q$1790	Q99KF1	TMED9_MOUSE	Tmed9	Transmembrane emp24 domain-containing protein 9	1	14.47	4	7176913	6683419	7416151	11862406	287088	813697	566586	2773272	8.9	27.2	17.1	52.3	-1.1	0.9	1	0.9	1.7	0.6	1.1	0.9	1.8	0.6	1.6	0.6	0.08
Q$640	P17710-3	HXK1_MOUSE	Hk	Isoform HK1 of Hexokinase-1	1	37.04	25	7163466	5842135	7757051	8549630	996476	653967	582310	411311	31.1	25	16.8	10.8	-1.2	0.7	1.1	0.7	1.2	0.7	1.3	0.3	1.5	0.05	1.1	0.7	0.08
Q$1162	P61089	UBE2N_MOUSE	Ube2n	Ubiquitin-conjugating enzyme E2 N	1	36.84	4	7151824	5020148	7134004	10721941	1047472	384611	663222	899310	32.7	17.1	20.8	18.8	-1.4	0.2	-1	1	1.5	0.1	1.4	0.1	2.1	0.002	1.5	0.06	0.001
Q$1800	Q99KV1	DJB11_MOUSE	Dnajb11	DnaJ homolog subfamily B member 11	1	16.2	5	7144131	6210888	6765022	7671344	932723	451748	728869	804279	29.2	16.3	24.1	23.4	-1.2	0.9	-1.1	0.9	1.1	0.9	1.1	0.9	1.2	0.6	1.1	0.9	0.6
Q$722	Q6PDM2	SRSF1_MOUSE	Srsf1	Serine/arginine-rich splicing factor 1	1	29.44	7	7136086	5539123	6751812	8650200	1998957	981511	1174853	1242748	62.6	39.6	38.9	32.1	-1.3	0.9	-1.1	0.9	1.2	0.9	1.2	0.9	1.6	0.4	1.3	0.8	0.5
Q$725	O55143-2	AT2A2_MOUSE	Atp2a	Isoform SERCA2A of Sarcoplasmic/endoplasmic reticulum calcium ATPase 2	1	21.54	18	7131008	6020951	7557218	8970369	692482	587565	381038	602000	21.7	21.8	11.3	15	-1.2	0.4	1.1	0.6	1.3	0.3	1.3	0.3	1.5	0.05	1.2	0.3	0.02
Q$741	J3QNR5	J3QNR5_MOUSE	Tubb4b-ps1	Uncharacterized protein	1	20.95	5	7127353	5281005	7623629	11108453	833203	385736	272359	712696	26.1	16.3	8	14.3	-1.3	0.2	1.1	0.6	1.6	0.02	1.4	0.006	2.1	0.0006	1.5	0.007	4e-05
Q$1277	P84078	ARF1_MOUSE	Arf1	ADP-ribosylation factor 1	1	57.46	6	7073725	4466180	7491261	9714441	1331895	347891	747473	825719	42.1	17.4	22.3	19	-1.6	0.3	1.1	0.8	1.4	0.3	1.7	0.03	2.2	0.002	1.3	0.3	0.007
Q$743	J3QQ26	J3QQ26_MOUSE	Pcna-ps2	Proliferating cell nuclear antigen	1	55.17	13	7070921	4922660	7282314	10383376	1260048	623200	713740	963889	39.8	28.3	21.9	20.8	-1.4	0.3	1	0.9	1.5	0.2	1.5	0.2	2.1	0.009	1.4	0.2	0.006
Q$865	P07742	RIR1_MOUSE	Rrm1	Ribonucleoside-diphosphate reductase large subunit	0.9987	6.69	3	7067368	5287790	7512287	10591911	737567	489258	404093	540922	23.3	20.7	12	11.4	-1.3	0.2	1.1	0.6	1.5	0.02	1.4	0.02	2	0.0005	1.4	0.009	5e-05
Q$1014	P29351-2	PTN6_MOUSE	Ptpn	Isoform 2 of Tyrosine-protein phosphatase non-receptor type 6	1	27.64	11	7066757	5448367	7326062	9266938	1160568	736343	673717	634567	36.7	30.2	20.6	15.3	-1.3	0.5	1	0.9	1.3	0.4	1.3	0.3	1.7	0.03	1.3	0.3	0.04
Q$1546	Q6ZQM8	UD17C_MOUSE	Ugt1a7c	UDP-glucuronosyltransferase 1-7C	1	18.64	8	7058336	5289981	8677502	10577312	1424244	745504	891122	1124137	45.1	31.5	23	23.8	-1.3	0.5	1.2	0.5	1.5	0.3	1.6	0.09	2	0.03	1.2	0.5	0.02
Q$1112	P51437	CRAMP_MOUSE	Camp	Cathelin-related antimicrobial peptide	1	35.84	4	6994069	5605606	8959776	10818514	2001306	1213651	1834654	1453788	64	48.4	45.8	30	-1.2	0.8	1.3	0.8	1.5	0.6	1.6	0.6	1.9	0.1	1.2	0.8	0.2
Q$1660	Q8CG48	SMC2_MOUSE	Smc2	Structural maintenance of chromosomes protein 2	1	3.95	4	6990321	6068232	9262405	7394693	1300305	859201	1905990	1047679	41.6	31.7	46	31.7	-1.2	0.9	1.3	0.9	1.1	0.9	1.5	0.7	1.2	0.9	-1.3	0.9	0.4
Q$707	H3BKA1	H3BKA1_MOUSE	Acaa1a	3-ketoacyl-CoA thiolase A, peroxisomal (Fragment)	1	48.24	7	6985397	5466667	6872798	7987181	929859	303165	414203	725661	29.8	12.4	13.5	20.3	-1.3	0.5	-1	0.9	1.1	0.7	1.3	0.1	1.5	0.07	1.2	0.5	0.09
Q$536	E9Q7Q3	E9Q7Q3_MOUSE	Tpm3	Tropomyosin alpha-3 chain	1	33.47	13	6975177	5485638	7944036	9333570	1070084	903461	1021834	697957	34.3	36.8	28.8	16.7	-1.3	0.6	1.1	0.6	1.3	0.4	1.4	0.4	1.7	0.06	1.2	0.6	0.06
Q$943	P17183	ENOG_MOUSE	Eno2	Gamma-enolase	1	6.91	1	6964400	3507610	7892960	10195940	1623111	797174	852057	986091	52.1	50.8	24.1	21.6	-2	0.3	1.1	0.6	1.5	0.3	2.3	0.03	2.9	0.004	1.3	0.3	0.005
Q$101	B0F2B4	NLGN4_MOUSE	Nlgn4l	Neuroligin 4-like	0.9809	6.88	2	6962134	4909324	11918480	14247306	2082361	998912	5658289	4401078	66.9	45.5	106.2	69.1	-1.4	0.8	1.7	0.8	2	0.6	2.4	0.7	2.9	0.5	1.2	0.8	0.3
Q$1391	Q3V117	Q3V117_MOUSE	Acly	ATP-citrate synthase	1	15.08	11	6955355	6228695	8034038	8431637	907261	522748	745952	584529	29.2	18.8	20.8	15.5	-1.1	0.8	1.2	0.8	1.2	0.6	1.3	0.4	1.4	0.1	1	0.8	0.2
Q$1140	Q8CFQ9	Q8CFQ9_MOUSE	Fus	Fusion, derived from t(1216) malignant liposarcoma (Human)	1	23.21	11	6934694	5275614	7996875	10030237	1230149	584745	627632	523360	39.7	24.8	17.5	11.7	-1.3	0.4	1.2	0.5	1.4	0.1	1.5	0.06	1.9	0.002	1.3	0.1	0.005
Q$2053	Q9R0N0	GALK1_MOUSE	Galk1	Galactokinase	0.9999	22.45	4	6923761	5712736	7935810	9071132	1122250	921908	765879	853233	36.2	36.1	21.6	21	-1.2	0.7	1.1	0.7	1.3	0.5	1.4	0.4	1.6	0.2	1.1	0.7	0.1
Q$1111	P51174	ACADL_MOUSE	Acadl	Long-chain specific acyl-CoA dehydrogenase, mitochondrial	1	11.63	4	6915675	5662011	5600476	8857566	511677	321455	464427	1189328	16.5	12.7	18.5	30	-1.2	0.3	-1.2	0.3	1.3	0.3	-1	0.9	1.6	0.2	1.6	0.2	0.02
Q$1280	P84104-2	SRSF3_MOUSE	Srsf	Isoform Short of Serine/arginine-rich splicing factor 3	1	30.65	5	6879014	5655744	8026245	9885921	562608	314859	139053	964349	18.3	12.4	3.9	21.8	-1.2	0.3	1.2	0.3	1.4	0.1	1.4	0.0008	1.7	0.02	1.2	0.3	0.0008
Q$1839	Q9CQ19	MYL9_MOUSE	Myl9	Myosin regulatory light polypeptide 9	1	11.63	1	6874180	6609240	8119480	9243110	872534	362590	610529	1444552	28.4	12.3	16.8	34.9	-1	0.8	1.2	0.6	1.3	0.6	1.2	0.3	1.4	0.5	1.1	0.7	0.2
Q$938	P16460	ASSY_MOUSE	Ass1	Argininosuccinate synthase	1	20.87	7	6871023	5480025	7666128	9588702	1689496	956790	639381	648953	55	39	18.6	15.1	-1.3	0.7	1.1	0.7	1.4	0.4	1.4	0.3	1.7	0.04	1.3	0.3	0.09
Q$1799	Q99KR7	PPIF_MOUSE	Ppif	Peptidyl-prolyl cis-trans isomerase F, mitochondrial	1	28.16	3	6867836	5402537	7647694	36036994	744214	517292	418480	27282953	24.2	21.4	12.2	169.3	-1.3	0.5	1.1	0.8	5.2	0.8	1.4	0.06	6.7	0.8	4.7	0.8	0.4
Q$609	F6ZK01	F6ZK01_MOUSE	Prtn3	Myeloblastin (Fragment)	1	29.37	2	6847309	5647271	5373908	5872340	727728	750864	485848	507962	23.8	29.7	20.2	19.3	-1.2	0.8	-1.3	0.6	-1.2	0.8	-1.1	0.9	1	0.9	1.1	0.9	0.4
Q$257	Q9Z2I4-2	ROBO3_MOUSE	Robo	Isoform 2 of Roundabout homolog 3	0.9746	7.96	2	6831325	6719704	6800863	6542075	159020	242262	177254	198112	5.2	8.1	5.8	6.8	-1	1	-1	1	-1	0.9	1	1	-1	1	-1	0.9	0.7
Q$1054	P37040	NCPR_MOUSE	Por	NADPH--cytochrome P450 reductase	1	22.71	10	6760587	6403590	6809723	7368335	662069	761855	663049	501300	21.9	26.6	21.8	15.2	-1.1	1	1	1	1.1	1	1.1	1	1.2	0.9	1.1	1	0.8
Q$1475	Q62093	SRSF2_MOUSE	Srsf2	Serine/arginine-rich splicing factor 2	1	11.31	2	6756043	5003848	7968623	9358080	830806	403141	520151	642227	27.5	18	14.6	15.3	-1.4	0.3	1.2	0.3	1.4	0.1	1.6	0.01	1.9	0.003	1.2	0.3	0.001
Q$929	P15089	CBPA3_MOUSE	Cpa3	Mast cell carboxypeptidase A	1	17.51	5	6740791	5390124	5956503	9553946	999954	742516	434767	1959748	33.2	30.8	16.3	45.9	-1.3	0.7	-1.1	0.7	1.4	0.7	1.1	0.7	1.8	0.4	1.6	0.5	0.1
Q$1689	Q8K4Z5	SF3A1_MOUSE	Sf3a1	Splicing factor 3A subunit 1	1	10.62	5	6736892	4925446	6618219	9594824	1380151	919223	627686	1211326	45.8	41.7	21.2	28.2	-1.4	0.5	-1	0.9	1.4	0.5	1.3	0.5	1.9	0.09	1.4	0.3	0.05
Q$1114	P51859	HDGF_MOUSE	Hdgf	Hepatoma-derived growth factor	1	21.94	4	6677897	4872820	8121404	11346413	1322551	593148	973644	990692	44.3	27.2	26.8	19.5	-1.4	0.4	1.2	0.4	1.7	0.1	1.7	0.1	2.3	0.003	1.4	0.1	0.002
Q$1740	Q91VW3	SH3L3_MOUSE	Sh3bgrl3	SH3 domain-binding glutamic acid-rich-like protein 3	1	67.74	4	6643180	4803739	7258912	10127937	1494511	664599	737433	913791	50.3	30.9	22.7	20.2	-1.4	0.5	1.1	0.7	1.5	0.2	1.5	0.2	2.1	0.009	1.4	0.2	0.01
Q$789	O35737	HNRH1_MOUSE	Hnrnph1	Heterogeneous nuclear ribonucleoprotein H	1	28.51	10	6639803	5462962	6947144	8731159	1075306	610619	679343	758211	36.2	25	21.9	19.4	-1.2	0.6	1	0.8	1.3	0.5	1.3	0.5	1.6	0.06	1.3	0.5	0.07
Q$1253	P70195	PSB7_MOUSE	Psmb7	Proteasome subunit beta type-7	1	20.58	3	6628427	4745186	9426794	10091987	1447410	1153483	1445756	843182	48.8	54.4	34.3	18.7	-1.4	0.6	1.4	0.5	1.5	0.3	2	0.2	2.1	0.03	1.1	0.7	0.03
Q$765	O09043	NAPSA_MOUSE	Napsa	Napsin-A	1	24.11	4	6617381	5590965	6945104	6475743	956879	619443	783103	463679	32.3	24.8	25.2	16	-1.2	0.9	1	1	-1	1	1.2	0.8	1.2	0.8	-1.1	0.9	0.6
Q$2038	Q9QXX4	CMC2_MOUSE	Slc25a13	Calcium-binding mitochondrial carrier protein Aralar2	1	11.54	5	6608476	6393447	7310303	7060248	772118	457955	1086936	695617	26.1	16	33.2	22	-1	1	1.1	1	1.1	1	1.1	1	1.1	1	-1	1	0.8
Q$2082	Q9WV80	SNX1_MOUSE	Snx1	Sorting nexin-1	1	16.67	4	6589399	5185708	5393347	8296982	1006050	1143722	1046328	2162769	34.1	49.3	43.4	58.3	-1.3	0.9	-1.2	0.9	1.3	0.9	1	0.9	1.6	0.8	1.5	0.8	0.4
Q$1858	Q9CQS8	SC61B_MOUSE	Sec61b	Protein transport protein Sec61 subunit beta	1	11.46	1	6586540	5964470	4770790	26453530	1057474	2050480	1338256	16137668	35.9	76.9	62.7	136.4	-1.1	0.9	-1.4	0.8	4	0.8	-1.3	0.9	4.4	0.8	5.5	0.8	0.2
Q$1848	Q9CQE8	CN166_MOUSE		UPF0568 protein C14orf166 homolog	1	18.85	3	6586450	4723134	7270661	8150759	1000366	309203	451237	594215	34	14.6	13.9	16.3	-1.4	0.4	1.1	0.6	1.2	0.5	1.5	0.008	1.7	0.005	1.1	0.5	0.01
Q$781	O35459	ECH1_MOUSE	Ech1	Delta(3,5)-Delta(2,4)-dienoyl-CoA isomerase, mitochondrial	1	30.89	7	6573612	4726141	9064784	9308165	1114189	816495	2512951	752244	37.9	38.6	62	18.1	-1.4	0.5	1.4	0.6	1.4	0.3	1.9	0.5	2	0.02	1	0.9	0.1
Q$1912	Q9D0R2	SYTC_MOUSE	Tars	Threonine--tRNA ligase, cytoplasmic	1	12.74	7	6558706	5555847	6813758	7528109	653777	742679	440641	619270	22.3	29.9	14.5	18.4	-1.2	0.8	1	0.8	1.1	0.8	1.2	0.6	1.4	0.4	1.1	0.8	0.2
Q$56	P47757-2	CAPZB_MOUSE	Capz	Isoform 2 of F-actin-capping protein subunit beta	1	30.15	6	6555279	5243840	6897917	7281646	1148912	667945	829880	700463	39.2	28.5	26.9	21.5	-1.3	0.8	1.1	0.9	1.1	0.9	1.3	0.6	1.4	0.3	1.1	0.9	0.4
Q$1042	P35293	RAB18_MOUSE	Rab18	Ras-related protein Rab-18	1	27.18	4	6546461	4998681	5551902	6052018	651553	547749	767851	752636	22.3	24.5	30.9	27.8	-1.3	0.5	-1.2	0.8	-1.1	0.9	1.1	0.9	1.2	0.8	1.1	0.9	0.4
Q$1261	P70404	IDHG1_MOUSE	Idh3g	Isocitrate dehydrogenase [NAD] subunit gamma 1, mitochondrial	1	33.08	7	6517555	5853227	6946867	15345889	653066	820876	731893	6061298	22.4	31.4	23.6	88.3	-1.1	0.8	1.1	0.8	2.4	0.7	1.2	0.7	2.6	0.7	2.2	0.7	0.1
Q$1165	P61205	ARF3_MOUSE	Arf3	ADP-ribosylation factor 3	1	41.44	5	6493823	4071817	6767798	8806087	1292562	375630	749192	899671	44.5	20.6	24.8	22.8	-1.6	0.4	1	0.9	1.4	0.4	1.7	0.06	2.2	0.008	1.3	0.4	0.02
Q$2039	Q9QY81	PO210_MOUSE	Nup210	Nuclear pore membrane glycoprotein 210	1	6.84	8	6485290	5013973	5801094	8148287	1130763	559630	537039	515032	39	25	20.7	14.1	-1.3	0.6	-1.1	0.6	1.3	0.6	1.2	0.6	1.6	0.02	1.4	0.07	0.05
Q$1589	Q8BFZ9	ERLN2_MOUSE	Erlin2	Erlin-2	0.9999	18.24	4	6481157	4991648	6237672	10298051	1240484	799377	1044714	1248941	42.8	35.8	37.5	27.1	-1.3	0.7	-1	0.9	1.6	0.2	1.2	0.7	2.1	0.04	1.7	0.2	0.02
Q$1992	Q9EPB4	ASC_MOUSE	Pycard	Apoptosis-associated speck-like protein containing a CARD	1	8.81	2	6419868	6602990	6522803	6202463	347969	158528	430331	649719	12.1	5.4	14.8	23.4	1	1	1	1	-1	1	-1	1	-1.1	1	-1.1	1	0.9
Q$562	F2Z452	F2Z452_MOUSE	Atp5l-ps1	Uncharacterized protein	1	43.69	4	6396589	6246600	5548602	8918261	621475	535536	517040	2342292	21.7	19.2	20.8	58.7	-1	0.9	-1.2	0.9	1.4	0.9	-1.1	0.9	1.4	0.9	1.6	0.8	0.3
Q$1398	Q5ISE2	Z36L3_MOUSE	Zfp36l3	Zinc finger protein 36, C3H1 type-like 3	0.9862	11.17	2	6378810	4977080	7177810	9831610	1070824	1314301	1881894	1741502	37.5	59	58.6	39.6	-1.3	0.8	1.1	0.8	1.5	0.5	1.4	0.8	2	0.3	1.4	0.8	0.2
Q$2020	Q9JJU8	SH3L1_MOUSE	Sh3bgrl	SH3 domain-binding glutamic acid-rich-like protein	1	58.77	4	6372558	6190088	6340482	7829892	352522	328081	334299	886779	12.4	11.9	11.8	25.3	-1	1	-1	1	1.2	0.6	1	1	1.3	0.5	1.2	0.6	0.1
Q$1516	Q6DFW4	NOP58_MOUSE	Nop58	Nucleolar protein 58	1	29.48	12	6372385	5027812	6628536	8532759	701612	528541	710241	845932	24.6	23.5	24	22.2	-1.3	0.4	1	0.8	1.3	0.4	1.3	0.4	1.7	0.05	1.3	0.4	0.02
Q$1908	Q9D0I9	SYRC_MOUSE	Rars	Arginine--tRNA ligase, cytoplasmic	0.9998	7.73	4	6367504	5963554	7382006	7303904	533431	556110	435271	1034809	18.7	20.9	13.2	31.7	-1.1	0.9	1.2	0.6	1.1	0.8	1.2	0.4	1.2	0.7	-1	0.9	0.4
Q$456	E9PW15	E9PW15_MOUSE	Suz12	Polycomb protein Suz12	0.9875	8.36	1	6366535	4971520	3708145	5181315	996527	615654	104967	759086	35	27.7	6.3	32.8	-1.3	0.6	-1.7	0.3	-1.2	0.6	-1.3	0.4	1	0.8	1.4	0.4	0.1
Q$1311	Q01320	TOP2A_MOUSE	Top2a	DNA topoisomerase 2-alpha	1	5.82	7	6357030	5402469	6399636	8523228	934807	651058	545619	773592	32.9	26.9	19.1	20.3	-1.2	0.7	1	1	1.3	0.4	1.2	0.6	1.6	0.09	1.3	0.2	0.05
Q$1282	P85094	ISC2A_MOUSE	Isoc2a	Isochorismatase domain-containing protein 2A, mitochondrial	1	30.1	4	6349584	4265977	5180400	5446950	2172701	864402	881755	444716	76.5	45.3	38.1	18.3	-1.5	0.9	-1.2	0.9	-1.2	0.9	1.2	0.9	1.3	0.8	1.1	0.9	0.7
Q$690	G5E850	G5E850_MOUSE	Cyb5	Cytochrome b-5, isoform CRA_a	1	65.31	6	6346864	5714860	6392571	7013143	452722	315085	378624	553314	15.9	12.3	13.2	17.6	-1.1	0.7	1	0.9	1.1	0.8	1.1	0.7	1.2	0.4	1.1	0.8	0.3
Q$1734	Q91VC3	IF4A3_MOUSE	Eif4a3	Eukaryotic initiation factor 4A-III	1	6.33	3	6340338	4475810	8651819	11831011	1365162	476526	695263	1056823	48.1	23.8	18	20	-1.4	0.3	1.4	0.3	1.9	0.05	1.9	0.006	2.6	0.001	1.4	0.1	0.0004
Q$547	E9QAP7	E9QAP7_MOUSE	Taf4a	Protein Taf4a	0.9774	10.27	2	6322110	4396802	6571210	7828710	367562	295471	310429	1018543	13	15	10.6	29.1	-1.4	0.02	1	0.6	1.2	0.5	1.5	0.006	1.8	0.1	1.2	0.5	0.006
Q$2107	Q9Z2P8	VAMP5_MOUSE	Vamp5	Vesicle-associated membrane protein 5	0.9984	12.75	1	6272030	4005530	10790480	11589450	616310	601688	712708	1221914	22	33.6	14.8	23.6	-1.6	0.06	1.7	0.005	1.8	0.01	2.7	0.0005	2.9	0.003	1.1	0.6	1e-05
Q$838	P01887	B2MG_MOUSE	B2m	Beta-2-microglobulin	0.9999	26.89	2	6263840	5764833	7371398	8001010	670070	491530	472772	1082790	23.9	19.1	14.3	30.3	-1.1	0.8	1.2	0.6	1.3	0.6	1.3	0.2	1.4	0.4	1.1	0.8	0.2
Q$1990	Q9DD03	RAB13_MOUSE	Rab13	Ras-related protein Rab-13	1	6.93	1	6239350	5282020	5794800	8454830	889394	562552	354067	1446398	31.9	23.8	13.7	38.3	-1.2	0.8	-1.1	0.8	1.4	0.6	1.1	0.8	1.6	0.4	1.5	0.5	0.1
Q$1154	P60764	RAC3_MOUSE	Rac3	Ras-related C3 botulinum toxin substrate 3	1	4.69	1	6235950	5116487	5076667	24266780	1059498	1563931	286562	13758061	38	68.3	12.6	126.8	-1.2	0.8	-1.2	0.8	3.9	0.8	-1	1	4.7	0.8	4.8	0.8	0.2
Q$1173	P62075	TIM13_MOUSE	Timm13	Mitochondrial import inner membrane translocase subunit Tim13	1	33.68	3	6225705	5417879	6552549	8298093	894737	766976	686504	904950	32.1	31.7	23.4	24.4	-1.1	0.8	1.1	0.8	1.3	0.5	1.2	0.7	1.5	0.2	1.3	0.5	0.1
Q$783	O35593	PSDE_MOUSE	Psmd14	26S proteasome non-ATPase regulatory subunit 14	1	23.55	3	6221220	5264664	7815705	7215448	1146082	587773	1207017	905568	41.2	25	34.5	28.1	-1.2	0.9	1.3	0.8	1.2	0.9	1.5	0.4	1.4	0.4	-1.1	0.9	0.3
Q$862	P07310	KCRM_MOUSE	Ckm	Creatine kinase M-type	1	14.7	3	6214801	5090516	6552218	10590451	657385	394824	606928	1323277	23.7	17.3	20.7	27.9	-1.2	0.3	1.1	0.7	1.7	0.09	1.3	0.2	2.1	0.07	1.6	0.09	0.001
Q$1952	Q9D8D6	Q9D8D6_MOUSE	2010005H15Rik	2010005H15Rik protein	1	31.96	3	6209057	2915561	6394015	8525701	1502176	298654	367402	959229	54.1	22.9	12.8	25.2	-2.1	0.3	1	0.9	1.4	0.4	2.2	0.0005	2.9	0.01	1.3	0.3	0.005
Q$1885	Q9CXT8	MPPB_MOUSE	Pmpcb	Mitochondrial-processing peptidase subunit beta	1	20.86	6	6208113	5746866	6710396	7400854	557350	558074	701108	374676	20.1	21.7	23.4	11.3	-1.1	0.8	1.1	0.8	1.2	0.5	1.2	0.8	1.3	0.2	1.1	0.8	0.2
Q$1130	P54775	PRS6B_MOUSE	Psmc4	26S protease regulatory subunit 6B	0.9998	20.33	4	6187848	5061506	7361997	8007145	1113495	910563	812897	666903	40.2	40.2	24.7	18.6	-1.2	0.8	1.2	0.8	1.3	0.6	1.5	0.4	1.6	0.2	1.1	0.8	0.1
Q$1451	Q61425	HCDH_MOUSE	Hadh	Hydroxyacyl-coenzyme A dehydrogenase, mitochondrial	1	37.58	4	6174509	5480559	6424840	7274780	993351	551453	716527	927989	36	22.5	24.9	28.5	-1.1	0.9	1	0.9	1.2	0.9	1.2	0.9	1.3	0.6	1.1	0.9	0.5
Q$1943	Q9D6R2-2	IDH3A_MOUSE	Idh3	Isoform 2 of Isocitrate dehydrogenase [NAD] subunit alpha, mitochondrial	1	22.92	5	6168909	5154479	6353665	6237749	555211	568690	854452	678335	20.1	24.7	30.1	24.3	-1.2	0.8	1	1	1	1	1.2	0.8	1.2	0.8	-1	1	0.6
Q$1292	P97425	ECP2_MOUSE	Ear2	Eosinophil cationic protein 2	1	44.87	4	6162106	5642720	8360917	9160796	1168486	511958	639960	1145417	42.4	20.3	17.1	28	-1.1	0.8	1.4	0.4	1.5	0.4	1.5	0.06	1.6	0.1	1.1	0.8	0.04
Q$835	P00493	HPRT_MOUSE	Hprt1	Hypoxanthine-guanine phosphoribosyltransferase	1	38.07	4	6161573	5371143	6875935	7834157	564244	329549	243305	299154	20.5	13.7	7.9	8.5	-1.1	0.5	1.1	0.5	1.3	0.1	1.3	0.03	1.5	0.003	1.1	0.1	0.002
Q$646	P62897	CYC_MOUSE	Cycs	Cytochrome c, somatic	1	34.29	3	6157170	5474770	5951719	6538351	559010	270247	273596	589326	20.3	11	10.3	20.2	-1.1	0.8	-1	0.9	1.1	0.9	1.1	0.8	1.2	0.6	1.1	0.8	0.4
Q$1994	Q9EQI5	Q9EQI5_MOUSE	Ppbp	Chemokine (C-X-C motif) ligand 7, isoform CRA_b	1	41.59	3	6150360	4785379	6867180	6184802	1317394	905140	706049	715833	47.9	42.3	23	25.9	-1.3	0.9	1.1	0.9	1	1	1.4	0.5	1.3	0.8	-1.1	0.9	0.5
Q$1184	P62267	RS23_MOUSE	Rps23	40S ribosomal protein S23	1	35.66	7	6148956	5214424	7354977	8497236	1168879	626568	565029	632121	42.5	26.9	17.2	16.6	-1.2	0.6	1.2	0.6	1.4	0.4	1.4	0.2	1.6	0.04	1.2	0.5	0.05
Q$1998	Q9ERE2	KRT81_MOUSE	Krt81	Keratin, type II cuticular Hb1	1	17.05	10	6133084	8205419	3870933	78039372	1332092	5532086	457048	62762661	48.6	150.8	26.4	179.8	1.3	0.8	-1.6	0.6	12.7	0.8	-2.1	0.8	9.5	0.8	20.2	0.8	0.3
Q$1100	P49717	MCM4_MOUSE	Mcm4	DNA replication licensing factor MCM4	1	11.48	7	6127764	3957294	6586264	9165342	1173145	412766	995042	1521973	42.8	23.3	33.8	37.1	-1.5	0.4	1.1	0.8	1.5	0.4	1.7	0.2	2.3	0.1	1.4	0.4	0.03
Q$1079	P46664	PURA2_MOUSE	Adss	Adenylosuccinate synthetase isozyme 2	0.9999	14.04	4	6126414	4264044	5972905	7438692	740601	288197	225550	396899	27	15.1	8.4	11.9	-1.4	0.1	-1	0.9	1.2	0.3	1.4	0.008	1.7	0.001	1.2	0.05	0.002
Q$1985	Q9DCM0	ETHE1_MOUSE	Ethe1	Persulfide dioxygenase ETHE1, mitochondrial	1	33.07	5	6092459	5281139	6316061	7740592	536323	256528	470507	772226	19.7	10.9	16.7	22.3	-1.2	0.4	1	0.8	1.3	0.4	1.2	0.4	1.5	0.09	1.2	0.4	0.04
Q$1356	Q3TW96	UAP1L_MOUSE	Uap1l1	UDP-N-acetylhexosamine pyrophosphorylase-like protein 1	1	11.05	4	6078050	7873908	6388762	8362320	1192798	1933205	2685722	1454772	43.9	54.9	94	38.9	1.3	1	1.1	1	1.4	0.8	-1.2	1	1.1	1	1.3	1	0.8
Q$1134	P55302	AMRP_MOUSE	Lrpap1	Alpha-2-macroglobulin receptor-associated protein	1	15.83	6	6042729	4994738	7727273	12723633	1540701	922038	901097	4457467	57	41.3	26.1	78.3	-1.2	0.7	1.3	0.7	2.1	0.6	1.5	0.3	2.5	0.6	1.6	0.7	0.2
Q$1732	Q91VA7	Q91VA7_MOUSE	Idh3b	Isocitrate dehydrogenase 3 (NAD+) beta	1	23.7	6	6023578	5474512	6837868	7731481	894992	778820	850841	1082416	33.2	31.8	27.8	31.3	-1.1	0.9	1.1	0.9	1.3	0.8	1.2	0.8	1.4	0.6	1.1	0.9	0.4
Q$770	O09167	RL21_MOUSE	Rpl21	60S ribosomal protein L21	0.9998	18.75	4	5993370	3846796	5983330	8746800	1230171	471837	764403	1082521	45.9	27.4	28.6	27.7	-1.6	0.3	-1	1	1.5	0.3	1.6	0.2	2.3	0.02	1.5	0.3	0.02
Q$1686	Q8K411-2	PREP_MOUSE	Pitrm	Isoform 2 of Presequence protease, mitochondrial	1	15.85	9	5971531	5171257	6278418	7060705	621581	462586	498712	811542	23.3	20	17.8	25.7	-1.2	0.8	1.1	0.8	1.2	0.8	1.2	0.5	1.4	0.4	1.1	0.8	0.2
Q$1840	Q9CQ22	LTOR1_MOUSE	Lamtor1	Ragulator complex protein LAMTOR1	0.9522	8.07	1	5971330	4868550	6579260	7861880	695343	559111	459563	437272	26	25.7	15.6	12.4	-1.2	0.4	1.1	0.5	1.3	0.2	1.4	0.2	1.6	0.02	1.2	0.2	0.01
Q$1877	Q9CWF2	TBB2B_MOUSE	Tubb2b	Tubulin beta-2B chain	1	12.13	6	5971033	4828043	6558200	8177554	780612	344367	310027	411214	29.2	15.9	10.6	11.2	-1.2	0.4	1.1	0.5	1.4	0.1	1.4	0.03	1.7	0.001	1.2	0.05	0.002
Q$1585	Q8BFR4	GNS_MOUSE	Gns	N-acetylglucosamine-6-sulfatase	1	15.99	6	5969611	4122667	6574094	7775953	1440789	553661	645352	479699	54	30	22	13.8	-1.4	0.6	1.1	0.7	1.3	0.6	1.6	0.1	1.9	0.006	1.2	0.5	0.06
Q$737	J3QNG0	J3QNG0_MOUSE	Gm5424	MCG15755	1	16.26	6	5966448	4608724	6718633	8485367	1577549	892473	601949	527208	59.1	43.3	20	13.9	-1.3	0.7	1.1	0.7	1.4	0.4	1.5	0.3	1.8	0.03	1.3	0.3	0.08
Q$182	D3YW48	D3YW48_MOUSE	Capns1	Calpain small subunit 1 (Fragment)	1	30.29	4	5949373	5753109	5688580	21720869	620378	1860099	564837	11180015	23.3	72.3	22.2	115.1	-1	1	-1	1	3.7	0.8	-1	1	3.8	0.8	3.8	0.8	0.2
Q$1987	Q9DCS9	NDUBA_MOUSE	Ndufb10	NADH dehydrogenase [ubiquinone] 1 beta subcomplex subunit 10	1	42.05	5	5942636	5153455	5684951	6635972	338982	112245	208680	405578	12.8	4.9	8.2	13.7	-1.2	0.2	-1	0.5	1.1	0.4	1.1	0.2	1.3	0.1	1.2	0.2	0.02
Q$458	E9PW69	E9PW69_MOUSE	Psma4	Proteasome subunit alpha type (Fragment)	1	33.81	3	5929996	4692090	7050580	10093312	774521	505375	339192	1452642	29.2	24.1	10.8	32.2	-1.3	0.4	1.2	0.4	1.7	0.1	1.5	0.03	2.2	0.04	1.4	0.3	0.003
Q$1312	Q01730	RSU1_MOUSE	Rsu1	Ras suppressor protein 1	1	26.35	5	5928026	5140917	5944058	7097822	918709	349069	436962	576508	34.7	15.2	16.4	18.2	-1.2	0.7	1	1	1.2	0.7	1.2	0.6	1.4	0.1	1.2	0.6	0.2
Q$843	P02535	K1C10_MOUSE	Krt10	Keratin, type I cytoskeletal 10	1	19.3	6	5912792	6017469	5281781	18452574	1679247	2369821	1220215	10731988	63.5	88.1	51.7	130	1	1	-1.1	1	3.1	0.9	-1.1	1	3.1	0.9	3.5	0.9	0.3
Q$1264	Q60817	NACA_MOUSE	Naca	Nascent polypeptide-associated complex subunit alpha	1	33.95	8	5906370	4613391	6928562	9466861	968415	538753	746587	896869	36.7	26.1	24.1	21.2	-1.3	0.5	1.2	0.5	1.6	0.1	1.5	0.1	2.1	0.01	1.4	0.2	0.004
Q$849	P04104	K2C1_MOUSE	Krt1	Keratin, type II cytoskeletal 1	1	3.61	2	5903521	4370767	6870729	7859895	802048	915320	875973	819511	30.4	46.8	28.5	23.3	-1.4	0.6	1.2	0.7	1.3	0.4	1.6	0.4	1.8	0.1	1.1	0.7	0.06
Q$1159	P61027	RAB10_MOUSE	Rab10	Ras-related protein Rab-10	1	17	3	5901520	5454447	5621646	6124025	552821	273977	377570	565528	20.9	11.2	15	20.6	-1.1	1	-1	1	1	1	1	1	1.1	0.9	1.1	1	0.7
Q$1028	P31996-2	CD68_MOUSE	Cd6	Isoform Short of Macrosialin	0.9999	11.01	3	5896920	4739068	6615178	8987687	556355	461603	335888	586343	21.1	21.8	11.4	14.6	-1.2	0.3	1.1	0.3	1.5	0.03	1.4	0.03	1.9	0.003	1.4	0.03	0.0001
Q$1945	Q9D6Z1	NOP56_MOUSE	Nop56	Nucleolar protein 56	1	26.38	11	5866356	4680597	6718188	8777835	858577	767737	807675	821457	32.7	36.7	26.9	20.9	-1.3	0.6	1.1	0.6	1.5	0.2	1.4	0.4	1.9	0.04	1.3	0.4	0.02
Q$2021	Q9JJZ2	TBA8_MOUSE	Tuba8	Tubulin alpha-8 chain	1	8.69	4	5863864	3974702	5849361	7749181	664608	354009	397938	600560	25.3	19.9	15.2	17.3	-1.5	0.1	-1	1	1.3	0.1	1.5	0.04	1.9	0.004	1.3	0.1	0.001
Q$1983	Q9DCJ5	NDUA8_MOUSE	Ndufa8	NADH dehydrogenase [ubiquinone] 1 alpha subcomplex subunit 8	1	32.56	4	5848525	3199283	3933824	4543264	982791	491393	536528	394007	37.6	34.3	30.5	19.4	-1.8	0.2	-1.5	0.4	-1.3	0.6	1.2	0.6	1.4	0.3	1.2	0.6	0.06
Q$844	P02535-3	K1C10_MOUSE	Krt1	Isoform 3 of Keratin, type I cytoskeletal 10	1	18.61	6	5832408	6171079	6705693	18905425	1683325	2407891	1039412	10700296	64.5	87.2	34.7	126.6	1.1	1	1.1	1	3.2	0.9	1.1	1	3.1	0.9	2.8	0.9	0.3
Q$1699	Q8R1F1	NIBL1_MOUSE	Fam129b	Niban-like protein 1	1	11.21	5	5829276	3989285	5847564	7253619	1635079	734940	640578	1006459	62.7	41.2	24.5	31	-1.5	0.7	1	1	1.2	0.7	1.5	0.4	1.8	0.2	1.2	0.7	0.2
Q$923	P14426	HA13_MOUSE	H2-D1	H-2 class I histocompatibility antigen, D-K alpha chain	1	16.57	5	5823937	5161550	5963552	6318357	533516	278809	429630	407657	20.5	12.1	16.1	14.4	-1.1	0.8	1	0.9	1.1	0.9	1.2	0.6	1.2	0.3	1.1	0.9	0.3
Q$911	P12265	BGLR_MOUSE	Gusb	Beta-glucuronidase	1	10.03	4	5812096	4574150	6038024	7638651	1041375	479573	595301	546405	40.1	23.4	22	16	-1.3	0.5	1	0.9	1.3	0.4	1.3	0.4	1.7	0.02	1.3	0.4	0.05
Q$2101	Q9Z204-3	HNRPC_MOUSE	Hnrnp	Isoform 3 of Heterogeneous nuclear ribonucleoproteins C1/C2	1	23.21	7	5804175	4475350	7128274	8807412	1016565	613274	719771	657667	39.2	30.6	22.6	16.7	-1.3	0.5	1.2	0.5	1.5	0.1	1.6	0.1	2	0.008	1.2	0.3	0.007
Q$1808	Q99LF4	RTCB_MOUSE	Rtcb	tRNA-splicing ligase RtcB homolog	0.9989	13.07	3	5800882	4653157	6245030	6970766	479913	518296	401482	613710	18.5	24.9	14.4	19.7	-1.2	0.5	1.1	0.6	1.2	0.5	1.3	0.2	1.5	0.1	1.1	0.6	0.04
Q$1853	Q9CQM9	GLRX3_MOUSE	Glrx3	Glutaredoxin-3	1	21.66	3	5790443	5788219	6389844	7764331	658515	1010399	672628	787696	25.4	39	23.5	22.7	-1	1	1.1	0.9	1.3	0.4	1.1	0.9	1.3	0.6	1.2	0.6	0.3
Q$799	O55029	COPB2_MOUSE	Copb2	Coatomer subunit beta'	1	7.29	5	5748781	5045729	17227396	15426828	669328	400666	11241489	8214459	26	17.8	145.9	119.1	-1.1	0.9	3	0.9	2.7	0.9	3.4	0.9	3.1	0.9	-1.1	0.9	0.5
Q$864	P07724	ALBU_MOUSE	Alb	Serum albumin	1	4.77	3	5744942	5465370	5709753	7393391	405952	451021	567761	1419737	15.8	18.5	22.2	42.9	-1.1	1	-1	1	1.3	0.8	1	1	1.4	0.8	1.3	0.8	0.4
Q$1539	Q6PFB2	Q6PFB2_MOUSE	Rcc1	Rcc1 protein	1	28.11	6	5709190	4188613	6403939	8482475	1194865	713281	895656	691868	46.8	38.1	31.3	18.2	-1.4	0.5	1.1	0.7	1.5	0.3	1.5	0.3	2	0.02	1.3	0.3	0.03
Q$824	O88668	CREG1_MOUSE	Creg1	Protein CREG1	1	13.18	3	5679515	5363995	7831581	7558463	453840	199319	2292918	1621412	17.9	8.3	65.5	48	-1.1	0.9	1.4	0.9	1.3	0.9	1.5	0.9	1.4	0.8	-1	0.9	0.5
Q$1066	Q9DCW5	Q9DCW5_MOUSE	Cox6a1	Cytochrome c oxidase subunit 6A, mitochondrial	1	34.82	3	5658510	5034398	6146720	6010469	1113066	813289	1022019	669350	44	36.1	37.2	24.9	-1.1	1	1.1	1	1.1	1	1.2	0.9	1.2	0.9	-1	1	0.8
Q$928	P14901	HMOX1_MOUSE	Hmox1	Heme oxygenase 1	1	20.76	5	5646774	4438627	6535456	7563924	920948	393024	707559	643626	36.5	19.8	24.2	19	-1.3	0.6	1.2	0.6	1.3	0.4	1.5	0.2	1.7	0.02	1.2	0.6	0.03
Q$606	Q7M739	Q7M739_MOUSE	Tpr	Nuclear pore complex-associated intranuclear coiled-coil protein TPR	1	3.48	7	5633802	4110308	6122102	8727793	795899	484383	309125	880448	31.6	26.4	11.3	22.6	-1.4	0.3	1.1	0.6	1.5	0.09	1.5	0.04	2.1	0.01	1.4	0.09	0.001
Q$221	D3YZZ5	D3YZZ5_MOUSE	Tmed7	Protein Tmed7	0.9945	13.84	2	5624164	5149468	5484414	5873706	360880	316027	369907	512911	14.3	13.7	15.1	19.5	-1.1	0.9	-1	0.9	1	0.9	1.1	0.9	1.1	0.8	1.1	0.9	0.6
Q$1150	P59999	ARPC4_MOUSE	Arpc4	Actin-related protein 2/3 complex subunit 4	0.9959	24.4	3	5615308	4202428	6966903	8071232	1294099	891422	1027753	1061550	51.5	47.4	33	29.4	-1.3	0.8	1.2	0.8	1.4	0.5	1.7	0.3	1.9	0.1	1.2	0.8	0.1
Q$1259	P70372	ELAV1_MOUSE	Elavl1	ELAV-like protein 1	1	17.48	5	5607843	3929581	5902417	8212669	1180836	562584	719443	977603	47.1	32	27.3	26.6	-1.4	0.4	1.1	0.8	1.5	0.3	1.5	0.3	2.1	0.03	1.4	0.3	0.03
Q$2109	Q9Z2U0	PSA7_MOUSE	Psma7	Proteasome subunit alpha type-7	1	23.79	4	5601910	4148682	6372610	7820601	934146	449002	556044	703412	37.3	24.2	19.5	20.1	-1.4	0.4	1.1	0.5	1.4	0.3	1.5	0.07	1.9	0.01	1.2	0.4	0.01
Q$837	P01027	CO3_MOUSE	C3	Complement C3	0.9992	2.53	2	5579641	6751107	5801168	6182788	661506	826059	663050	592470	26.5	27.4	25.6	21.4	1.2	0.9	1	0.9	1.1	0.9	-1.2	0.9	-1.1	0.9	1.1	0.9	0.7
Q$1227	P63073	IF4E_MOUSE	Eif4e	Eukaryotic translation initiation factor 4E	1	11.52	2	5575917	3828925	8776063	12800907	854619	503577	797916	819082	34.3	29.4	20.3	14.3	-1.5	0.1	1.6	0.05	2.3	0.001	2.3	0.003	3.3	9e-05	1.5	0.02	2e-06
Q$1846	Q9CQB4	Q9CQB4_MOUSE	Uqcrb	Cytochrome b-c1 complex subunit 7	1	49.55	6	5557982	4897275	6545972	7566832	404145	529580	327306	803316	16.3	24.2	11.2	23.7	-1.1	0.5	1.2	0.3	1.4	0.2	1.3	0.1	1.5	0.1	1.2	0.5	0.02
Q$1940	Q9D6J6	NDUV2_MOUSE	Ndufv2	NADH dehydrogenase [ubiquinone] flavoprotein 2, mitochondrial	1	21.77	4	5549991	4537096	5733400	6499246	321816	308856	183965	575592	13	15.2	7.2	19.8	-1.2	0.2	1	0.6	1.2	0.5	1.3	0.06	1.4	0.08	1.1	0.5	0.02
Q$507	E9Q390	E9Q390_MOUSE	Myof	Myoferlin	1	6.54	10	5547186	4815983	6102719	7527804	1259688	368515	577840	406258	50.8	17.1	21.2	12.1	-1.2	0.8	1.1	0.8	1.4	0.5	1.3	0.3	1.6	0.007	1.2	0.3	0.1
Q$898	P11031	TCP4_MOUSE	Sub1	Activated RNA polymerase II transcriptional coactivator p15	1	18.9	3	5528804	4225442	5860449	6268968	1275862	896987	972531	611137	51.6	47.5	37.1	21.8	-1.3	0.9	1.1	0.9	1.1	0.9	1.4	0.8	1.5	0.5	1.1	0.9	0.5
Q$626	F8WHL2	F8WHL2_MOUSE	Copa	Coatomer subunit alpha	1	10.54	9	5502467	4086087	6484695	15086813	1059242	546952	564216	6982959	43	29.9	19.5	103.5	-1.3	0.7	1.2	0.7	2.7	0.7	1.6	0.09	3.7	0.7	2.3	0.7	0.2
Q$1380	Q3UJB0	Q3UJB0_MOUSE	Sf3b2	Protein Sf3b2	1	9.79	8	5443619	4574496	5627376	9755508	913983	537188	513589	2805862	37.5	26.3	20.4	64.3	-1.2	0.7	1	0.9	1.8	0.6	1.2	0.6	2.1	0.6	1.7	0.6	0.1
Q$1346	Q3THE2	ML12B_MOUSE	Myl12b	Myosin regulatory light chain 12B	1	41.28	7	5435385	4164951	5472871	6563859	816998	271898	359705	273121	33.6	14.6	14.7	9.3	-1.3	0.4	1	1	1.2	0.4	1.3	0.1	1.6	0.002	1.2	0.2	0.03
Q$1549	Q6ZWQ9	Q6ZWQ9_MOUSE	Myl12a	MCG5400	1	41.28	7	5425990	4218011	5544363	6608998	752296	286822	320843	293752	31	15.2	12.9	9.9	-1.3	0.4	1	0.9	1.2	0.4	1.3	0.07	1.6	0.002	1.2	0.2	0.02
Q$1836	Q9CPW4	ARPC5_MOUSE	Arpc5	Actin-related protein 2/3 complex subunit 5	1	56.95	4	5400859	4082549	6216199	7462329	794382	365378	595608	571459	32.9	20	21.4	17.1	-1.3	0.4	1.2	0.4	1.4	0.2	1.5	0.08	1.8	0.006	1.2	0.4	0.008
Q$2044	Q9QZ23	NFU1_MOUSE	Nfu1	NFU1 iron-sulfur cluster scaffold homolog, mitochondrial	0.9999	5.88	1	5395550	3743140	7993640	9608820	1104381	379798	456486	567642	45.8	22.7	12.8	13.2	-1.4	0.2	1.5	0.2	1.8	0.04	2.1	0.0005	2.6	0.0002	1.2	0.2	8e-05
Q$241	D3Z220	D3Z220_MOUSE	Ctsc	Dipeptidyl peptidase 1 (Fragment)	1	4.72	1	5388260	3432095	5227085	7443980	1050660	586802	767730	1251715	43.6	38.2	32.8	37.6	-1.6	0.5	-1	0.9	1.4	0.5	1.5	0.4	2.2	0.1	1.4	0.5	0.06
Q$1554	Q6ZWZ7	Q6ZWZ7_MOUSE	Rpl17	60S ribosomal protein L17	1	28.26	6	5371915	4211101	6179663	7509760	948082	711151	712369	582747	39.5	37.8	25.8	17.4	-1.3	0.6	1.2	0.6	1.4	0.4	1.5	0.4	1.8	0.04	1.2	0.5	0.04
Q$979	P22907-2	HEM3_MOUSE	Hmb	Isoform 2 of Porphobilinogen deaminase	1	20.06	5	5339833	4209882	6938659	7364129	919247	299302	362494	351109	38.5	15.9	11.7	10.7	-1.3	0.5	1.3	0.4	1.4	0.3	1.6	0.002	1.7	0.0008	1.1	0.5	0.003
Q$900	P11087-2	CO1A1_MOUSE	Col1a	Isoform 2 of Collagen alpha-1(I) chain	0.9984	16.73	5	5339036	4288069	14731112	14673933	592082	250533	7447570	6258548	24.8	13.1	113	95.4	-1.2	0.6	2.8	0.6	2.7	0.6	3.4	0.6	3.4	0.6	-1	1	0.3
Q$1946	Q9D7N9	APMAP_MOUSE	Apmap	Adipocyte plasma membrane-associated protein	1	10.12	2	5310812	2951347	5781591	14431792	1039917	342928	154339	4697297	43.8	26	6	72.8	-1.8	0.3	1.1	0.7	2.7	0.3	2	0.0004	4.9	0.3	2.5	0.3	0.02
Q$1263	P70460	VASP_MOUSE	Vasp	Vasodilator-stimulated phosphoprotein	1	17.07	2	5289855	4639991	5486729	6123064	914082	751583	449565	149564	38.6	36.2	18.3	5.5	-1.1	0.8	1	0.9	1.2	0.8	1.2	0.8	1.3	0.5	1.1	0.7	0.5
Q$1138	Q3U4W8	Q3U4W8_MOUSE	Usp5	Ubiquitin carboxyl-terminal hydrolase	1	17.96	7	5288915	4150579	5987908	7030755	751401	570705	591148	514486	31.8	30.7	22.1	16.4	-1.3	0.5	1.1	0.5	1.3	0.3	1.4	0.2	1.7	0.03	1.2	0.5	0.03
Q$1305	P99026	PSB4_MOUSE	Psmb4	Proteasome subunit beta type-4	1	36.36	5	5277488	4524922	5185515	31124545	736668	1655832	512428	21516353	31.2	81.8	22.1	154.6	-1.2	1	-1	1	5.9	0.9	1.1	1	6.9	0.9	6	0.9	0.3
Q$2114	Q9Z2Y8	PROSC_MOUSE	Prosc	Proline synthase co-transcribed bacterial homolog protein	1	37.59	5	5267655	3622653	5621673	7080378	690805	96736	353353	423689	29.3	6	14.1	13.4	-1.5	0.2	1.1	0.7	1.3	0.2	1.6	0.02	2	0.005	1.3	0.1	0.0005
Q$240	D3Z5N2	D3Z5N2_MOUSE	Stmn1	Stathmin	1	21.77	3	5264183	3350541	6420496	10452101	1349569	651821	904926	1743150	57.3	43.5	31.5	37.3	-1.6	0.4	1.2	0.5	2	0.2	1.9	0.1	3.1	0.03	1.6	0.2	0.007
Q$763	O08997	ATOX1_MOUSE	Atox1	Copper transport protein ATOX1	1	47.06	4	5224564	4059239	5754189	7714165	671751	582348	405231	879105	28.8	32.1	15.7	25.5	-1.3	0.4	1.1	0.5	1.5	0.2	1.4	0.2	1.9	0.05	1.3	0.2	0.009
Q$593	P31786	ACBP_MOUSE	Dbi	Acyl-CoA-binding protein	1	52.87	5	5192655	2883776	6207558	8756936	1115837	439713	445995	596823	48.1	34.1	16.1	15.2	-1.8	0.2	1.2	0.4	1.7	0.07	2.2	0.004	3	0.0003	1.4	0.04	0.0002
Q$1072	P45376	ALDR_MOUSE	Akr1b1	Aldose reductase	1	26.58	6	5189977	4577851	7148814	7727009	658610	402297	997878	1396940	28.4	19.7	31.2	40.4	-1.1	0.7	1.4	0.5	1.5	0.5	1.6	0.2	1.7	0.4	1.1	0.7	0.09
Q$2064	Q9R257	HEBP1_MOUSE	Hebp1	Heme-binding protein 1	1	48.95	6	5186283	4438406	5502648	11741303	720954	441771	247548	3810550	31.1	22.3	10.1	72.6	-1.2	0.6	1.1	0.7	2.3	0.5	1.2	0.3	2.6	0.5	2.1	0.5	0.06
Q$1477	Q62167	DDX3X_MOUSE	Ddx3x	ATP-dependent RNA helicase DDX3X	1	21.6	11	5172492	4084723	5629412	6788633	706023	296880	472712	408285	30.5	16.3	18.8	13.4	-1.3	0.3	1.1	0.6	1.3	0.3	1.4	0.1	1.7	0.004	1.2	0.3	0.01
Q$575	F6THG2	F6THG2_MOUSE	Arpc1b	Actin-related protein 2/3 complex subunit 1B (Fragment)	1	48.57	5	5155325	4610165	5349100	6618227	1044496	453054	552971	599556	45.3	22	23.1	20.3	-1.1	0.9	1	0.9	1.3	0.7	1.2	0.7	1.4	0.2	1.2	0.6	0.3
Q$1450	Q61335	BAP31_MOUSE	Bcap31	B-cell receptor-associated protein 31	1	16.73	4	5152328	4375158	5759430	6766010	917322	711208	673428	759799	39.8	36.3	26.1	25.1	-1.2	0.8	1.1	0.8	1.3	0.7	1.3	0.7	1.5	0.3	1.2	0.7	0.2
Q$914	P12970	RL7A_MOUSE	Rpl7a	60S ribosomal protein L7a	1	33.46	9	5125735	4450870	6207218	7697367	1149765	760729	1056964	1208929	50.2	38.2	38.1	35.1	-1.2	0.8	1.2	0.8	1.5	0.6	1.4	0.6	1.7	0.3	1.2	0.8	0.2
Q$1279	P84096	RHOG_MOUSE	Rhog	Rho-related GTP-binding protein RhoG	1	29.84	3	5122829	4127165	7341067	7363963	1171643	930354	747561	687422	51.1	50.4	22.8	20.9	-1.2	0.8	1.4	0.4	1.4	0.4	1.8	0.1	1.8	0.1	1	1	0.05
Q$1482	Q62318-2	TIF1B_MOUSE	Trim2	Isoform 2 of Transcription intermediary factor 1-beta	1	10.2	3	5122760	4030713	6239614	8799155	903925	491623	562152	1566983	39.5	27.3	20.1	39.8	-1.3	0.5	1.2	0.5	1.7	0.3	1.5	0.1	2.2	0.2	1.4	0.4	0.02
Q$1039	P35278	RAB5C_MOUSE	Rab5c	Ras-related protein Rab-5C	1	37.96	5	5113622	4540330	4989129	5473592	438424	445934	215624	454697	19.2	22	9.7	18.6	-1.1	0.9	-1	0.9	1.1	0.9	1.1	0.9	1.2	0.7	1.1	0.9	0.5
Q$2089	Q9Z0N1	IF2G_MOUSE	Eif2s3x	Eukaryotic translation initiation factor 2 subunit 3, X-linked	1	28.18	9	5065873	3791510	6236756	12502722	864397	487960	617354	4091241	38.2	28.8	22.1	73.2	-1.3	0.5	1.2	0.5	2.5	0.5	1.6	0.08	3.3	0.4	2	0.5	0.05
Q$5	P02535-2	K1C10_MOUSE	Krt1	Isoform 2 of Keratin, type I cytoskeletal 10	1	12.12	5	5062361	5488361	4287368	17546282	1666127	2372541	1137156	10753228	73.6	96.7	59.3	137	1.1	1	-1.2	1	3.5	0.9	-1.3	1	3.2	0.9	4.1	0.9	0.3
Q$2103	Q9Z2I0	LETM1_MOUSE	Letm1	LETM1 and EF-hand domain-containing protein 1, mitochondrial	1	15.99	7	5062217	4340604	5121634	7245816	446863	298513	346572	1506045	19.7	15.4	15.1	46.5	-1.2	0.6	1	0.9	1.4	0.6	1.2	0.6	1.7	0.6	1.4	0.6	0.1
Q$949	P17563	SBP1_MOUSE	Selenbp1	Selenium-binding protein 1	1	15.89	5	5055810	3700372	5818933	6905383	899175	519600	576193	599829	39.8	31.4	22.1	19.4	-1.4	0.5	1.2	0.5	1.4	0.4	1.6	0.1	1.9	0.02	1.2	0.5	0.02
Q$264	D3Z5N9	D3Z5N9_MOUSE	Gm5449	MCG49198	1	23.73	4	5045019	4022403	5810530	6800707	586171	394585	410594	524461	26	21.9	15.8	17.2	-1.3	0.4	1.2	0.4	1.3	0.2	1.4	0.07	1.7	0.02	1.2	0.4	0.007
Q$1244	P68037	UB2L3_MOUSE	Ube2l3	Ubiquitin-conjugating enzyme E2 L3	1	48.7	5	5035624	2830194	5534305	7685830	767616	262762	323503	477686	34.1	20.8	13.1	13.9	-1.8	0.06	1.1	0.6	1.5	0.06	2	0.001	2.7	0.0001	1.4	0.02	4e-05
Q$1604	Q8BHN3-2	GANAB_MOUSE	Gana	Isoform 2 of Neutral alpha-glucosidase AB	1	19.88	14	5032221	3648169	4867284	5231201	654911	408849	520365	461141	29.1	25.1	23.9	19.7	-1.4	0.4	-1	1	1	1	1.3	0.4	1.4	0.2	1.1	0.9	0.2
Q$1911	Q9D0M3-2	CY1_MOUSE	Cyc	Isoform 2 of Cytochrome c1, heme protein, mitochondrial	1	33.83	5	5000807	2846484	4641064	5807463	1266908	340377	524701	430137	56.6	26.7	25.3	16.6	-1.8	0.4	-1.1	0.8	1.2	0.8	1.6	0.1	2	0.004	1.3	0.4	0.07
Q$234	Q8BML9	Q8BML9_MOUSE	Qars	Glutaminyl-tRNA synthetase	0.9994	5.94	3	4995024	4800621	5915341	6361664	564244	677006	741123	720390	25.3	31.5	28	25.3	-1	0.9	1.2	0.8	1.3	0.6	1.2	0.8	1.3	0.6	1.1	0.9	0.3
Q$1041	P35282	RAB21_MOUSE	Rab21	Ras-related protein Rab-21	0.9366	4.5	1	4984900	4288260	5120090	5389030	516758	472695	319353	416349	23.2	24.6	13.9	17.3	-1.2	0.8	1	0.9	1.1	0.9	1.2	0.6	1.3	0.5	1.1	0.9	0.4
Q$1063	P42125	ECI1_MOUSE	Eci1	Enoyl-CoA delta isomerase 1, mitochondrial	1	11.76	2	4977142	3831374	5531813	6173625	581235	425334	591200	400070	26.1	24.8	23.9	14.5	-1.3	0.4	1.1	0.6	1.2	0.4	1.4	0.2	1.6	0.02	1.1	0.6	0.03
Q$1984	Q9DCL9	PUR6_MOUSE	Paics	Multifunctional protein ADE2	1	16.94	6	4969724	4463121	4576853	5622547	349918	134476	188485	364951	15.7	6.7	9.2	14.5	-1.1	0.6	-1.1	0.6	1.1	0.6	1	0.6	1.3	0.1	1.2	0.2	0.04
Q$47	A2AKV1	A2AKV1_MOUSE	Atp5c1	ATP synthase subunit gamma, mitochondrial (Fragment)	1	22.08	3	4963210	4682318	5056718	8246532	1038942	1283978	1002104	3266033	46.8	61.3	44.3	88.6	-1.1	1	1	1	1.7	0.9	1.1	1	1.8	0.9	1.6	0.9	0.5
Q$1956	Q9D8U8	SNX5_MOUSE	Snx5	Sorting nexin-5	0.9994	15.1	5	4958824	4209360	4640629	6090908	712547	406986	479118	1265883	32.1	21.6	23.1	46.5	-1.2	0.9	-1.1	0.9	1.2	0.9	1.1	0.9	1.4	0.8	1.3	0.8	0.4
Q$541	E9Q8T1	E9Q8T1_MOUSE	Tacc2	Transforming acidic coiled-coil-containing protein 2	0.9873	7.43	4	4938658	3800742	6383860	5347012	866391	452150	1092622	746732	39.2	26.6	38.3	31.2	-1.3	0.7	1.3	0.7	1.1	0.7	1.7	0.3	1.4	0.5	-1.2	0.7	0.2
Q$194	D3YX79	D3YX79_MOUSE	Gm8394	Proteasome subunit alpha type	1	12.86	2	4920575	4372290	4535825	5275865	578295	388601	388779	195590	26.3	19.9	19.2	8.3	-1.1	0.9	-1.1	0.9	1.1	0.9	1	0.9	1.2	0.4	1.2	0.5	0.4
Q$2018	Q9JJ28	FLII_MOUSE	Flii	Protein flightless-1 homolog	0.9994	2.99	2	4919916	4200061	5494027	5267347	493346	523126	313363	663556	22.4	27.9	12.8	28.2	-1.2	0.8	1.1	0.8	1.1	0.9	1.3	0.3	1.3	0.7	-1	0.9	0.3
Q$1506	Q64511	TOP2B_MOUSE	Top2b	DNA topoisomerase 2-beta	1	4.22	6	4904413	4869355	4941940	6559604	418885	530622	213472	716267	19.1	24.4	9.7	24.4	-1	1	1	1	1.3	0.4	1	1	1.3	0.4	1.3	0.4	0.08
Q$1898	Q9CZ30	OLA1_MOUSE	Ola1	Obg-like ATPase 1	1	14.39	5	4884515	3683585	4964840	6313056	738778	644155	450819	670738	33.8	39.1	20.3	23.8	-1.3	0.5	1	0.9	1.3	0.5	1.3	0.5	1.7	0.1	1.3	0.5	0.07
Q$802	O70133-3	DHX9_MOUSE	Dhx	Isoform 3 of ATP-dependent RNA helicase A	1	11.25	11	4868544	3373622	4359222	5843596	925822	362157	232877	489615	42.5	24	11.9	18.7	-1.4	0.4	-1.1	0.6	1.2	0.6	1.3	0.2	1.7	0.02	1.3	0.1	0.05
Q$1522	Q6IRU2	TPM4_MOUSE	Tpm4	Tropomyosin alpha-4 chain	0.9999	22.18	3	4850923	3543741	5097466	5370513	893823	271074	643850	986421	41.2	17.1	28.2	41.1	-1.4	0.6	1.1	1	1.1	1	1.4	0.3	1.5	0.5	1.1	1	0.4
Q$624	F8WGX5	F8WGX5_MOUSE	Dmxl1	DmX-like protein 1	0.9551	0.5	1	4823800	2775755	6400990	8948950	930257	346189	447520	684722	43.1	27.9	15.6	17.1	-1.7	0.1	1.3	0.2	1.9	0.03	2.3	0.001	3.2	0.0003	1.4	0.04	4e-05
Q$1845	Q9CQA3	DHSB_MOUSE	Sdhb	Succinate dehydrogenase [ubiquinone] iron-sulfur subunit, mitochondrial	1	20.57	5	4823033	3870749	5505695	6654369	462055	445785	564889	874360	21.4	25.8	22.9	29.4	-1.2	0.4	1.1	0.5	1.4	0.3	1.4	0.2	1.7	0.1	1.2	0.5	0.03
Q$1914	Q9D0S9	HINT2_MOUSE	Hint2	Histidine triad nucleotide-binding protein 2, mitochondrial	0.9166	12.27	1	4801110	3141879	6721500	9359920	635232	387660	557978	715482	29.6	27.6	18.6	17.1	-1.5	0.1	1.4	0.1	1.9	0.006	2.1	0.004	3	0.0004	1.4	0.06	9e-06
Q$890	P10404	ENV1_MOUSE		MLV-related proviral Env polyprotein	0.9862	3.28	1	4800170	3702530	4758270	5795820	419110	220528	411043	500569	19.5	13.3	19.3	19.3	-1.3	0.2	-1	0.9	1.2	0.4	1.3	0.2	1.6	0.03	1.2	0.4	0.02
Q$1239	P63325	RS10_MOUSE	Rps10	40S ribosomal protein S10	1	23.64	3	4799333	4328576	4643807	6562475	399898	346559	192950	786443	18.6	17.9	9.3	26.8	-1.1	0.8	-1	0.8	1.4	0.3	1.1	0.8	1.5	0.2	1.4	0.3	0.02
Q$1310	Q01149	CO1A2_MOUSE	Col1a2	Collagen alpha-2(I) chain	0.9555	1.9	1	4701130	3338390	5380050	6324790	1345590	317908	395856	491526	64	21.3	16.5	17.4	-1.4	0.6	1.1	0.7	1.3	0.6	1.6	0.02	1.9	0.006	1.2	0.5	0.08
Q$1703	Q8R2Y8	PTH2_MOUSE	Ptrh2	Peptidyl-tRNA hydrolase 2, mitochondrial	1	19.34	2	4693730	4071917	4727165	6208722	304762	405989	306932	148835	14.5	22.3	14.5	5.4	-1.2	0.6	1	0.9	1.3	0.01	1.2	0.6	1.5	0.007	1.3	0.01	0.001
Q$243	D3Z2H9	D3Z2H9_MOUSE	Tpm3-rs7	Uncharacterized protein	1	27.02	7	4690980	4002305	4847960	5552506	459159	423226	519141	351794	21.9	23.6	23.9	14.2	-1.2	0.7	1	0.8	1.2	0.6	1.2	0.7	1.4	0.1	1.1	0.7	0.1
Q$759	O08795-2	GLU2B_MOUSE	Prkcs	Isoform 2 of Glucosidase 2 subunit beta	1	9.28	5	4690873	3131699	3945532	5800211	909284	298531	346151	580251	43.3	21.3	19.6	22.4	-1.5	0.4	-1.2	0.6	1.2	0.6	1.3	0.4	1.9	0.02	1.5	0.1	0.03
Q$1298	P97461	RS5_MOUSE	Rps5	40S ribosomal protein S5	1	36.76	5	4684087	4046294	4554061	7702474	475668	138139	233837	1421606	22.7	7.6	11.5	41.3	-1.2	0.4	-1	0.8	1.6	0.3	1.1	0.3	1.9	0.3	1.7	0.3	0.01
Q$1595	Q8BGQ7	SYAC_MOUSE	Aars	Alanine--tRNA ligase, cytoplasmic	1	11.88	7	4677424	4240266	5138247	5541322	352429	198097	271276	252327	16.8	10.4	11.8	10.2	-1.1	0.7	1.1	0.7	1.2	0.3	1.2	0.1	1.3	0.02	1.1	0.7	0.02
Q$1419	Q60692	PSB6_MOUSE	Psmb6	Proteasome subunit beta type-6	1	43.28	5	4669435	3366176	5470576	10666576	758023	611598	368303	3522712	36.3	40.6	15.1	73.8	-1.4	0.5	1.2	0.5	2.3	0.5	1.6	0.1	3.2	0.4	1.9	0.5	0.06
Q$1018	P29595	NEDD8_MOUSE	Nedd8	NEDD8	1	34.57	3	4668521	2082140	5757790	8054843	1281398	399672	871160	668385	61.4	42.9	33.8	18.6	-2.2	0.2	1.2	0.5	1.7	0.2	2.8	0.02	3.9	0.0004	1.4	0.2	0.002
Q$1851	Q9CQJ8	NDUB9_MOUSE	Ndufb9	NADH dehydrogenase [ubiquinone] 1 beta subcomplex subunit 9	0.9998	11.73	1	4667080	3275140	5515460	7347910	1322524	722364	803631	694068	63.4	49.3	32.6	21.1	-1.4	0.6	1.2	0.6	1.6	0.4	1.7	0.3	2.2	0.02	1.3	0.4	0.04
Q$1922	Q9D1D4	TMEDA_MOUSE	Tmed10	Transmembrane emp24 domain-containing protein 10	1	17.35	4	4660840	4055360	4386575	5773680	336536	252804	310522	975120	16.1	13.9	15.8	37.8	-1.1	0.6	-1.1	0.7	1.2	0.7	1.1	0.7	1.4	0.6	1.3	0.7	0.2
Q$138	B2RY56	RBM25_MOUSE	Rbm25	RNA-binding protein 25	0.9999	4.06	2	4654232	1978631	4417878	6174171	2004730	573885	1083956	883125	96.3	64.9	54.9	32	-2.4	0.7	-1.1	0.9	1.3	0.8	2.2	0.3	3.1	0.02	1.4	0.7	0.2
Q$1559	Q78ZA7	NP1L4_MOUSE	Nap1l4	Nucleosome assembly protein 1-like 4	1	29.33	6	4626179	3104494	5414154	6987685	870885	372711	451782	417450	42.1	26.8	18.7	13.4	-1.5	0.3	1.2	0.4	1.5	0.1	1.7	0.02	2.3	0.0007	1.3	0.1	0.002
Q$1941	Q9D6J6-2	NDUV2_MOUSE	Ndufv	Isoform 2 of NADH dehydrogenase [ubiquinone] flavoprotein 2, mitochondrial	1	22.37	3	4618696	3721021	4899551	5429791	212087	269137	123245	558317	10.3	16.2	5.6	23	-1.2	0.1	1.1	0.5	1.2	0.5	1.3	0.02	1.5	0.1	1.1	0.5	0.02
Q$1193	P62334	PRS10_MOUSE	Psmc6	26S protease regulatory subunit 10B	1	21.34	5	4615876	3357067	5298284	8985642	741640	278887	279871	1163204	35.9	18.6	11.8	28.9	-1.4	0.3	1.1	0.4	1.9	0.05	1.6	0.007	2.7	0.03	1.7	0.09	0.0003
Q$1240	P63330	PP2AA_MOUSE	Ppp2ca	Serine/threonine-protein phosphatase 2A catalytic subunit alpha isoform	1	23.95	5	4592981	3404724	6188349	5594123	856444	386752	338262	332075	41.7	25.4	12.2	13.3	-1.3	0.6	1.3	0.4	1.2	0.6	1.8	0.004	1.6	0.01	-1.1	0.6	0.009
Q$987	P24668	MPRD_MOUSE	M6pr	Cation-dependent mannose-6-phosphate receptor	1	19.06	5	4586785	3813571	4722250	5887800	637338	580446	570503	458827	31.1	34	27	17.4	-1.2	0.7	1	0.9	1.3	0.5	1.2	0.7	1.5	0.1	1.2	0.5	0.1
Q$286	D6RCW7	D6RCW7_MOUSE	Capza2	F-actin-capping protein subunit alpha-2	1	26.44	3	4584943	3020315	5523425	6661408	900850	533069	542499	614814	43.9	39.5	22	20.6	-1.5	0.4	1.2	0.4	1.5	0.3	1.8	0.05	2.2	0.01	1.2	0.4	0.009
Q$276	D3Z7C8	D3Z7C8_MOUSE	Bcat2	Branched-chain-amino-acid aminotransferase	1	17.78	5	4584048	4074625	4485417	4969160	416385	220429	302387	455160	20.3	12.1	15.1	20.5	-1.1	0.8	-1	0.9	1.1	0.8	1.1	0.8	1.2	0.5	1.1	0.8	0.4
Q$1379	Q6PDG5-2	SMRC2_MOUSE	Smarcc	Isoform 2 of SWI/SNF complex subunit SMARCC2	0.9759	0.73	1	4551073	4030027	5010867	4613940	508973	165468	169595	381510	25	9.2	7.6	18.5	-1.1	0.8	1.1	0.8	1	0.9	1.2	0.02	1.1	0.7	-1.1	0.8	0.3
Q$1294	P97429	ANXA4_MOUSE	Anxa4	Annexin A4	1	40.75	9	4506493	3973725	5297863	5237484	625094	322890	383515	367153	31	18.2	16.2	15.7	-1.1	0.8	1.2	0.8	1.2	0.8	1.3	0.2	1.3	0.2	-1	0.9	0.1
Q$1439	Q61093	CY24B_MOUSE	Cybb	Cytochrome b-245 heavy chain	1	13.51	4	4491830	3652770	3925809	4698497	572351	455892	310910	446667	28.5	27.9	17.7	21.3	-1.2	0.7	-1.1	0.8	1	0.9	1.1	0.9	1.3	0.6	1.2	0.7	0.4
Q$687	G3XA45	G3XA45_MOUSE	Vmn2r69	MCG59833	0.9394	2.35	1	4475810	4289710	5388850	5699120	268464	623063	315237	423951	13.4	32.5	13.1	16.6	-1	0.8	1.2	0.3	1.3	0.2	1.3	0.4	1.3	0.3	1.1	0.8	0.09
Q$1314	Q02013	AQP1_MOUSE	Aqp1	Aquaporin-1	0.9532	3.35	1	4466430	3463990	7199690	7483080	1050266	727316	800463	923308	52.6	46.9	24.9	27.6	-1.3	0.7	1.6	0.2	1.7	0.2	2.1	0.05	2.2	0.05	1	0.8	0.01
Q$1369	Q3UA72	Q3UA72_MOUSE	Arpc5	Actin-related protein 2/3 complex subunit 5	1	72.83	3	4456455	3256575	5297003	6424857	706687	298514	528188	541961	35.5	20.5	22.3	18.9	-1.4	0.4	1.2	0.4	1.4	0.2	1.6	0.05	2	0.005	1.2	0.4	0.005
Q$1438	Q61081	CDC37_MOUSE	Cdc37	Hsp90 co-chaperone Cdc37	1	18.47	5	4425599	3419887	5068901	6746294	691065	379740	404047	443511	34.9	24.8	17.8	14.7	-1.3	0.4	1.1	0.4	1.5	0.09	1.5	0.09	2	0.003	1.3	0.09	0.002
Q$1972	Q9DBS1	TMM43_MOUSE	Tmem43	Transmembrane protein 43	1	13.25	3	4416491	4262278	4706254	8857744	510640	424061	424964	3360711	25.9	22.2	20.2	84.8	-1	0.9	1.1	0.9	2	0.8	1.1	0.9	2.1	0.8	1.9	0.8	0.2
Q$525	G5E8F1	G5E8F1_MOUSE	Itgam	Integrin alpha M, isoform CRA_a	1	23.07	16	4408471	3749475	4493217	12874036	501319	240152	276684	7790879	25.4	14.3	13.8	135.3	-1.2	0.8	1	0.9	2.9	0.8	1.2	0.4	3.4	0.8	2.9	0.8	0.3
Q$1568	Q7TSV4	PGM2_MOUSE	Pgm2	Phosphoglucomutase-2	0.9998	12.1	3	4406774	3793389	4779737	6883378	780725	604123	518124	437181	39.6	35.6	24.2	14.2	-1.2	0.8	1.1	0.8	1.6	0.09	1.3	0.6	1.8	0.02	1.4	0.07	0.01
Q$1973	Q9DBZ5	EIF3K_MOUSE	Eif3k	Eukaryotic translation initiation factor 3 subunit K	1	15.6	2	4392215	3298469	4662054	5974867	594900	338558	195414	815576	30.3	23	9.4	30.5	-1.3	0.5	1.1	0.7	1.4	0.5	1.4	0.05	1.8	0.08	1.3	0.5	0.02
Q$1354	Q3TTY5	K22E_MOUSE	Krt2	Keratin, type II cytoskeletal 2 epidermal	1	3.39	3	4373016	3397109	3801606	6936036	1156625	1002536	922103	2223537	59.1	66	54.2	71.7	-1.3	0.9	-1.2	0.9	1.6	0.8	1.1	0.9	2	0.7	1.8	0.7	0.3
Q$910	P11983-2	TCPA_MOUSE	Tcp	Isoform 2 of T-complex protein 1 subunit alpha	1	17.16	5	4362472	2961306	4401700	5404289	810734	323083	549677	582216	41.6	24.4	27.9	24.1	-1.5	0.5	1	1	1.2	0.6	1.5	0.2	1.8	0.04	1.2	0.6	0.07
Q$691	G5E866	G5E866_MOUSE	Sf3b1	Splicing factor 3B subunit 1	1	8.67	7	4355737	3386013	5277070	15442198	584257	768068	360561	6512861	30	50.7	15.3	94.3	-1.3	0.5	1.2	0.5	3.5	0.5	1.6	0.3	4.6	0.5	2.9	0.5	0.07
Q$1094	P48999	LOX5_MOUSE	Alox5	Arachidonate 5-lipoxygenase	1	13.06	7	4350032	3574569	4394239	4875442	581866	416467	238932	401264	29.9	26.1	12.2	18.4	-1.2	0.8	1	0.9	1.1	0.8	1.2	0.5	1.4	0.3	1.1	0.8	0.2
Q$785	O35643	AP1B1_MOUSE	Ap1b1	AP-1 complex subunit beta-1	1	11.56	8	4343903	3445100	5042261	5862385	777338	499966	384012	356284	40	32.5	17	13.6	-1.3	0.6	1.2	0.6	1.3	0.4	1.5	0.2	1.7	0.03	1.2	0.4	0.03
Q$1971	Q9DBP5	KCY_MOUSE	Cmpk1	UMP-CMP kinase	1	36.73	5	4339672	3426718	4256927	4676257	839547	389090	394335	487649	43.3	25.4	20.7	23.3	-1.3	0.8	-1	0.9	1.1	0.9	1.2	0.6	1.4	0.4	1.1	0.9	0.5
Q$1326	Q05DV1	Q05DV1_MOUSE	Por	NADPH--cytochrome P450 reductase	1	16.8	8	4336511	4189769	4462025	4873889	521626	573177	451723	341114	26.9	30.6	22.6	15.6	-1	1	1	1	1.1	0.9	1.1	1	1.2	0.9	1.1	0.9	0.8
Q$1038	P35276	RAB3D_MOUSE	Rab3d	Ras-related protein Rab-3D	1	6.85	1	4330360	3184390	4066900	8383840	843560	434162	421796	1620776	43.6	30.5	23.2	43.2	-1.4	0.5	-1.1	0.8	1.9	0.2	1.3	0.5	2.6	0.2	2.1	0.2	0.007
Q$1055	P38060	HMGCL_MOUSE	Hmgcl	Hydroxymethylglutaryl-CoA lyase, mitochondrial	1	32.31	7	4328636	3434551	4574289	5214040	452319	241320	281322	159417	23.4	15.7	13.8	6.8	-1.3	0.3	1.1	0.7	1.2	0.3	1.3	0.07	1.5	0.002	1.1	0.3	0.006
Q$1442	Q61166	MARE1_MOUSE	Mapre1	Microtubule-associated protein RP/EB family member 1	1	27.24	4	4326351	2728287	4625103	7018652	538232	346499	358807	675646	27.8	28.4	17.3	21.5	-1.6	0.07	1.1	0.7	1.6	0.05	1.7	0.03	2.6	0.003	1.5	0.05	0.0002
Q$1775	Q925I1-2	ATAD3_MOUSE	Atad	Isoform 2 of ATPase family AAA domain-containing protein 3	0.9814	5.47	2	4318165	3808161	4235710	4844875	476018	296110	379174	405218	24.6	17.4	20	18.7	-1.1	0.9	-1	0.9	1.1	0.9	1.1	0.9	1.3	0.4	1.1	0.8	0.4
Q$1923	Q9D1D4-2	TMEDA_MOUSE	Tmed1	Isoform 2 of Transmembrane emp24 domain-containing protein 10	1	27.66	3	4307416	3755194	4061983	5358972	299908	221471	285867	942160	15.6	13.2	15.7	39.3	-1.1	0.7	-1.1	0.7	1.2	0.7	1.1	0.7	1.4	0.7	1.3	0.7	0.2
Q$1700	Q8R1V9	Q8R1V9_MOUSE	Qars	Protein Qars	0.9994	5.61	2	4298576	4162121	4417031	4605064	621834	761707	584117	720569	32.3	40.9	29.6	35	-1	1	1	1	1.1	1	1.1	1	1.1	1	1	1	1
Q$1490	Q62446	FKBP3_MOUSE	Fkbp3	Peptidyl-prolyl cis-trans isomerase FKBP3	0.9936	4.91	1	4276590	3214930	5115850	3856440	516216	315685	839068	767399	27	22	36.7	44.5	-1.3	0.5	1.2	0.8	-1.1	0.8	1.6	0.3	1.2	0.8	-1.3	0.8	0.2
Q$1217	P62960	YBOX1_MOUSE	Ybx1	Nuclease-sensitive element-binding protein 1	1	26.09	5	4271392	3260726	5682761	8918525	530379	368607	436119	1476304	27.8	25.3	17.2	37	-1.3	0.2	1.3	0.2	2.1	0.08	1.7	0.02	2.7	0.08	1.6	0.2	0.001
Q$1995	Q9EQI8	RM46_MOUSE	Mrpl46	39S ribosomal protein L46, mitochondrial	1	12.01	2	4267356	4202040	3721504	4371402	463763	425939	511531	421664	24.3	22.7	30.7	21.6	-1	1	-1.1	1	1	1	-1.1	1	1	1	1.2	0.9	0.8
Q$207	D3Z7M9	D3Z7M9_MOUSE	Anp32a	Acidic leucine-rich nuclear phosphoprotein 32 family member A	1	38.63	9	4260249	3144354	5074522	6251001	704053	332808	397996	318435	37	23.7	17.5	11.4	-1.4	0.3	1.2	0.3	1.5	0.1	1.6	0.03	2	0.0009	1.2	0.1	0.002
Q$1199	P62774	MTPN_MOUSE	Mtpn	Myotrophin	1	58.47	5	4221751	2666708	4897559	6579513	727484	186750	135205	707844	38.5	15.7	6.2	24.1	-1.6	0.2	1.2	0.4	1.6	0.2	1.8	7e-05	2.5	0.02	1.3	0.2	0.0007
Q$2014	Q9JIF7	COPB_MOUSE	Copb1	Coatomer subunit beta	1	6.93	4	4218779	3224141	4338824	5296236	703155	350111	492475	419162	37.3	24.3	25.4	17.7	-1.3	0.5	1	0.9	1.3	0.5	1.3	0.4	1.6	0.03	1.2	0.5	0.08
Q$1187	P62305	RUXE_MOUSE	Snrpe	Small nuclear ribonucleoprotein E	1	69.57	5	4218658	3397382	4404648	4964476	657242	401471	345022	462156	34.8	26.4	17.5	20.8	-1.2	0.8	1	0.8	1.2	0.8	1.3	0.4	1.5	0.2	1.1	0.8	0.2
Q$2075	Q9WUM3	COR1B_MOUSE	Coro1b	Coronin-1B	1	17.77	4	4196609	2716720	4741950	5250986	603575	309398	398584	578093	32.2	25.5	18.8	24.6	-1.5	0.2	1.1	0.7	1.3	0.6	1.7	0.02	1.9	0.02	1.1	0.7	0.01
Q$792	O35972	RM23_MOUSE	Mrpl23	39S ribosomal protein L23, mitochondrial	0.9207	8.9	1	4191770	3544430	4177170	4725340	161513	186696	102528	330274	8.6	11.8	5.5	15.6	-1.2	0.1	-1	0.9	1.1	0.4	1.2	0.09	1.3	0.08	1.1	0.4	0.01
Q$1678	Q8K135-2	K319L_MOUSE	Kiaa0319	Isoform 2 of Dyslexia-associated protein KIAA0319-like protein	0.9052	0.74	1	4184160	2894780	5874410	7819370	1156531	486104	403072	686899	61.8	37.5	15.3	19.6	-1.4	0.4	1.4	0.4	1.9	0.1	2	0.008	2.7	0.002	1.3	0.1	0.002
Q$1353	Q3TRH2	Q3TRH2_MOUSE	Psmd12	26S proteasome non-ATPase regulatory subunit 12	1	9.81	3	4176151	2452835	5008522	6216172	782565	387160	356619	583675	41.9	35.3	15.9	21	-1.7	0.3	1.2	0.4	1.5	0.3	2	0.006	2.5	0.004	1.2	0.3	0.002
Q$1753	Q91Z50	Q91Z50_MOUSE	Fen1	Flap endonuclease 1	1	20.53	5	4169457	3268486	5626665	5661647	344801	333303	446484	624852	18.5	22.8	17.7	24.7	-1.3	0.2	1.3	0.1	1.4	0.2	1.7	0.02	1.7	0.05	1	1	0.004
Q$1355	Q91WJ8-2	FUBP1_MOUSE	Fubp	Isoform 2 of Far upstream element-binding protein 1	1	15.92	7	4157436	3121115	4732740	5567565	626818	315096	248528	493135	33.7	22.6	11.7	19.8	-1.3	0.4	1.1	0.4	1.3	0.4	1.5	0.02	1.8	0.02	1.2	0.4	0.01
Q$1151	P60122	RUVB1_MOUSE	Ruvbl1	RuvB-like 1	1	19.74	5	4128906	3095607	4748165	6290095	836111	518538	555058	558280	45.3	37.5	26.1	19.8	-1.3	0.5	1.1	0.6	1.5	0.3	1.5	0.3	2	0.02	1.3	0.3	0.02
Q$1988	Q9DCT2	NDUS3_MOUSE	Ndufs3	NADH dehydrogenase [ubiquinone] iron-sulfur protein 3, mitochondrial	1	20.53	4	4110151	3296521	4524120	4444203	158203	156786	82335	367618	8.6	10.6	4.1	18.5	-1.2	0.03	1.1	0.1	1.1	0.7	1.4	0.0007	1.3	0.08	-1	0.8	0.004
Q$1861	Q9CQW9	IFM3_MOUSE	Ifitm3	Interferon-induced transmembrane protein 3	1	20.44	3	4102538	3373261	4253299	4745647	387909	341395	403244	328671	21.1	22.6	21.2	15.5	-1.2	0.6	1	0.8	1.2	0.6	1.3	0.5	1.4	0.1	1.1	0.6	0.1
Q$1175	P62137	PP1A_MOUSE	Ppp1ca	Serine/threonine-protein phosphatase PP1-alpha catalytic subunit	1	23.94	6	4089964	3798406	4011884	6515368	506014	514391	66322	1007454	27.7	30.3	3.7	34.6	-1.1	1	-1	1	1.6	0.3	1.1	1	1.7	0.2	1.6	0.3	0.02
Q$1418	Q60648	SAP3_MOUSE	Gm2a	Ganglioside GM2 activator	1	40.41	4	4085712	2455539	4975355	5794897	865489	337011	395309	495931	47.4	30.7	17.8	19.1	-1.7	0.4	1.2	0.4	1.4	0.4	2	0.006	2.4	0.003	1.2	0.4	0.004
Q$1497	Q64152-2	BTF3_MOUSE	Btf	Isoform 2 of Transcription factor BTF3	1	61.73	6	4083292	2386952	4874914	6977814	798640	418520	394583	413654	43.7	39.2	18.1	13.3	-1.7	0.2	1.2	0.4	1.7	0.04	2	0.01	2.9	0.0003	1.4	0.02	0.0002
Q$1616	Q8BKC5-2	IPO5_MOUSE	Ipo	Isoform 2 of Importin-5	1	10.03	6	4075256	3663251	4380074	5926676	646836	345643	643511	822930	35.5	21.1	32.9	31	-1.1	0.8	1.1	0.8	1.5	0.5	1.2	0.7	1.6	0.2	1.4	0.5	0.1
Q$1976	Q9DC69	NDUA9_MOUSE	Ndufa9	NADH dehydrogenase [ubiquinone] 1 alpha subcomplex subunit 9, mitochondrial	1	18.83	5	4074598	3426847	4822451	5484536	404136	134880	500474	385295	22.2	8.8	23.2	15.7	-1.2	0.4	1.2	0.5	1.3	0.2	1.4	0.2	1.6	0.006	1.1	0.5	0.009
Q$1075	P46425	GSTP2_MOUSE	Gstp2	Glutathione S-transferase P 2	1	54.29	5	4071503	3611947	3976240	4943804	549542	438741	475675	383869	30.2	27.2	26.7	17.4	-1.1	0.9	-1	0.9	1.2	0.6	1.1	0.9	1.4	0.3	1.2	0.6	0.3
Q$1958	Q9D8W5	PSD12_MOUSE	Psmd12	26S proteasome non-ATPase regulatory subunit 12	1	5.7	2	4049782	2342189	4869793	6062389	776224	368870	351928	571808	42.9	35.2	16.2	21.1	-1.7	0.3	1.2	0.4	1.5	0.3	2.1	0.006	2.6	0.004	1.2	0.3	0.002
Q$1527	Q6P069-2	SORCN_MOUSE	Sr	Isoform 2 of Sorcin	1	23.5	3	4043826	3154310	4205229	3957894	334365	149003	313587	421270	18.5	10.6	16.7	23.8	-1.3	0.2	1	1	-1	1	1.3	0.09	1.3	0.4	-1.1	1	0.1
Q$1573	Q80VF6-2	F181B_MOUSE	Fam181	Isoform 2 of Protein FAM181B	0.9982	21.54	2	4021137	4076333	3968064	3969813	84172	102448	156309	144866	4.7	5.6	8.8	8.2	1	1	-1	1	-1	1	-1	1	-1	1	1	1	0.9
Q$1874	Q9CU62	SMC1A_MOUSE	Smc1a	Structural maintenance of chromosomes protein 1A	0.9991	4.06	4	4020774	3258578	5283075	6026242	806079	431069	442634	707887	44.8	29.6	18.7	26.3	-1.2	0.6	1.3	0.5	1.5	0.3	1.6	0.06	1.8	0.06	1.1	0.6	0.03
Q$1328	Q07076	ANXA7_MOUSE	Anxa7	Annexin A7	1	5.18	2	4015597	3429778	4436348	6867571	512490	435832	373025	1041253	28.5	28.4	18.8	33.9	-1.2	0.7	1.1	0.7	1.7	0.2	1.3	0.3	2	0.09	1.5	0.2	0.009
Q$1152	P60229	EIF3E_MOUSE	Eif3e	Eukaryotic translation initiation factor 3 subunit E	1	13.03	4	4014236	3086540	4247137	4750394	493948	457399	505091	471031	27.5	33.1	26.6	22.2	-1.3	0.6	1.1	0.8	1.2	0.7	1.4	0.5	1.5	0.2	1.1	0.7	0.1
Q$1257	P70333	HNRH2_MOUSE	Hnrnph2	Heterogeneous nuclear ribonucleoprotein H2	1	21.16	8	4004385	3379886	4486926	5591623	559573	397427	442358	448744	31.2	26.3	22	17.9	-1.2	0.6	1.1	0.6	1.4	0.3	1.3	0.3	1.7	0.04	1.2	0.3	0.03
Q$751	O08547	SC22B_MOUSE	Sec22b	Vesicle-trafficking protein SEC22b	1	24.65	4	4001324	3027294	4654840	6052834	1060436	400561	772542	1077342	59.3	29.6	37.1	39.8	-1.3	0.7	1.2	0.7	1.5	0.6	1.5	0.4	2	0.2	1.3	0.7	0.1
Q$720	H7BWZ3	H7BWZ3_MOUSE	Arpc3	Actin-related protein 2/3 complex subunit 3	1	6.47	1	3968375	2437630	4911205	5728870	878382	567823	532313	541195	49.5	52.1	24.2	21.1	-1.6	0.5	1.2	0.5	1.4	0.4	2	0.06	2.4	0.02	1.2	0.5	0.01
Q$1778	Q99JB2	STML2_MOUSE	Stoml2	Stomatin-like protein 2, mitochondrial	1	30.59	7	3931749	3423883	4926122	4940031	261654	366753	1049424	990684	14.9	24	47.6	44.8	-1.1	0.7	1.3	0.8	1.3	0.8	1.4	0.7	1.4	0.7	1	1	0.4
Q$114	B1AT36	B1AT36_MOUSE	Psmd12	26S proteasome non-ATPase regulatory subunit 12	1	2.98	1	3927830	2255247	4735067	5874300	763438	370723	345203	599560	43.5	36.8	16.3	22.8	-1.7	0.3	1.2	0.4	1.5	0.3	2.1	0.006	2.6	0.005	1.2	0.3	0.002
Q$1960	Q9DAW6	PRP4_MOUSE	Prpf4	U4/U6 small nuclear ribonucleoprotein Prp4	0.9992	2.3	1	3927620	2813630	4515840	5412920	875859	378063	490181	422587	49.9	30	24.3	17.5	-1.4	0.5	1.1	0.6	1.4	0.5	1.6	0.1	1.9	0.01	1.2	0.5	0.04
Q$135	B2RUF0	B2RUF0_MOUSE	Ybx2	Y box protein 2	1	27.58	3	3920052	3598467	3852270	4442893	422657	215247	308481	537058	24.1	13.4	17.9	27	-1.1	0.9	-1	0.9	1.1	0.9	1.1	0.9	1.2	0.7	1.2	0.9	0.5
Q$615	Q8VHM5	Q8VHM5_MOUSE	Hnrnpr	Heterogeneous nuclear ribonucleoprotein R	1	9.02	5	3917413	3368324	2908485	5100824	1153860	1034567	279550	871514	65.9	68.7	21.5	38.2	-1.2	0.9	-1.3	0.9	1.3	0.9	-1.2	0.9	1.5	0.7	1.8	0.3	0.4
Q$1136	P56382	ATP5E_MOUSE	Atp5e	ATP synthase subunit epsilon, mitochondrial	0.981	13.46	1	3905030	3841560	4208580	3951160	366476	371108	431912	375215	21	21.6	22.9	21.2	-1	1	1.1	1	1	1	1.1	1	1	1	-1.1	1	0.9
Q$1653	Q8CAG6	Q8CAG6_MOUSE	Plek	Pleckstrin	1	33.33	5	3887039	2359295	3844511	4979235	954194	398582	500164	540769	54.9	37.8	29.1	24.3	-1.6	0.5	-1	1	1.3	0.6	1.6	0.2	2.1	0.03	1.3	0.5	0.07
Q$469	Q9QXS1-6	PLEC_MOUSE	Ple	Isoform PLEC-0,1C of Plectin	1	16.69	54	3879403	3117237	4140431	4994069	580551	278445	348787	299901	33.5	20	18.8	13.4	-1.2	0.5	1.1	0.7	1.3	0.3	1.3	0.2	1.6	0.01	1.2	0.3	0.03
Q$1404	Q5SUR0	PUR4_MOUSE	Pfas	Phosphoribosylformylglycinamidine synthase	0.9988	1.05	1	3873080	3138190	4639030	4488410	1041712	263360	288241	600810	60.1	18.8	13.9	29.9	-1.2	0.9	1.2	0.9	1.2	0.9	1.5	0.03	1.4	0.3	-1	0.9	0.4
Q$177	D3YWJ3	D3YWJ3_MOUSE	Rps2	40S ribosomal protein S2	1	27.81	6	3872847	3198416	4478190	9071496	542907	280597	313800	2702460	31.3	19.6	15.7	66.6	-1.2	0.5	1.2	0.5	2.3	0.4	1.4	0.09	2.8	0.4	2	0.4	0.04
Q$2088	Q9Z0J0	NPC2_MOUSE	Npc2	Epididymal secretory protein E1	1	28.19	3	3867543	2564152	5032044	5536269	832068	304093	440958	391156	48.1	26.5	19.6	15.8	-1.5	0.4	1.3	0.4	1.4	0.4	2	0.009	2.2	0.002	1.1	0.4	0.005
Q$706	H3BK79	H3BK79_MOUSE	Nucb1	Nucleobindin-1 (Fragment)	1	20.66	5	3839068	3326800	4286753	5862976	632182	450875	416195	469677	36.8	30.3	21.7	17.9	-1.2	0.8	1.1	0.8	1.5	0.2	1.3	0.4	1.8	0.03	1.4	0.2	0.01
Q$1457	Q61646	HPT_MOUSE	Hp	Haptoglobin	0.9926	2.31	1	3832450	2606500	4682060	5612130	911306	506587	723088	431653	53.2	43.5	34.5	17.2	-1.5	0.6	1.2	0.6	1.5	0.4	1.8	0.2	2.2	0.01	1.2	0.6	0.04
Q$1550	Q6ZWU9	RS27_MOUSE	Rps27	40S ribosomal protein S27	1	30.95	5	3826974	3382769	5053346	6141170	856150	285727	721650	456281	50	18.9	31.9	16.6	-1.1	0.6	1.3	0.6	1.6	0.2	1.5	0.2	1.8	0.005	1.2	0.6	0.03
Q$2047	Q9QZE5	COPG1_MOUSE	Copg1	Coatomer subunit gamma-1	1	7.89	4	3824728	1841795	3245142	4861036	1107454	235776	601387	840594	64.7	28.6	41.4	38.7	-2.1	0.5	-1.2	0.7	1.3	0.7	1.8	0.3	2.6	0.1	1.5	0.5	0.08
Q$736	J3QNB0	J3QNB0_MOUSE	Gm10704	MCG8837	1	14.75	2	3795380	2472417	4480401	5560179	940530	417021	434966	418308	55.4	37.7	21.7	16.8	-1.5	0.4	1.2	0.5	1.5	0.4	1.8	0.05	2.2	0.005	1.2	0.4	0.02
Q$1655	Q8CB58	Q8CB58_MOUSE	Ptbp1	MCG13402, isoform CRA_d	1	31.7	8	3791830	2835077	4589042	5732278	669026	300655	533046	369688	39.5	23.7	26	14.4	-1.3	0.4	1.2	0.4	1.5	0.1	1.6	0.1	2	0.002	1.2	0.3	0.005
Q$585	P68254-2	1433T_MOUSE	Ywha	Isoform 2 of 14-3-3 protein theta	1	47.33	6	3788780	3387313	4025318	5723760	563851	345505	465966	847512	33.3	22.8	25.9	33.1	-1.1	0.8	1.1	0.8	1.5	0.4	1.2	0.7	1.7	0.2	1.4	0.4	0.06
Q$109	O08573-2	LEG9_MOUSE	Lgals	Isoform Short of Galectin-9	1	21.74	5	3787081	2993212	3880546	4202496	259228	181632	164905	325809	15.3	13.6	9.5	17.3	-1.3	0.1	1	0.8	1.1	0.7	1.3	0.04	1.4	0.06	1.1	0.7	0.02
Q$1521	Q6IMF0	KRT83_MOUSE	Krt83	Keratin, type II cuticular Hb3	1	22.02	10	3772327	3198736	4071838	15144952	558062	655018	392083	9919283	33.1	45.8	21.5	146.5	-1.2	0.9	1.1	0.9	4	0.9	1.3	0.9	4.7	0.9	3.7	0.9	0.3
Q$58	P70290	EM55_MOUSE	Mpp1	55 kDa erythrocyte membrane protein	0.9985	4.51	2	3751208	2705290	4607600	4518700	765226	599794	446726	450365	45.6	49.6	21.7	22.3	-1.4	0.8	1.2	0.8	1.2	0.8	1.7	0.2	1.7	0.2	-1	0.9	0.1
Q$190	D3YX47	D3YX47_MOUSE	Rpl21-ps6	MCG20932	0.9998	14.84	3	3747840	2226866	3899845	5642565	1024303	401730	747706	683288	61.1	40.3	42.9	27.1	-1.7	0.4	1	0.9	1.5	0.4	1.8	0.4	2.5	0.02	1.4	0.4	0.04
Q$1098	P49615	CDK5_MOUSE	Cdk5	Cyclin-dependent kinase 5	0.9872	6.85	1	3728900	3230950	3827830	4366390	267072	401567	223605	310058	16	27.8	13.1	15.9	-1.2	0.6	1	0.8	1.2	0.6	1.2	0.6	1.4	0.3	1.1	0.6	0.1
Q$1508	Q64522	H2A2B_MOUSE	Hist2h2ab	Histone H2A type 2-B	1	22.31	2	3719948	4059813	3342413	5276018	535681	525890	543446	1316926	32.2	29	36.4	55.8	1.1	0.9	-1.1	0.9	1.4	0.8	-1.2	0.8	1.3	0.8	1.6	0.8	0.4
Q$74	A2AUR7	A2AUR7_MOUSE	Rsu1	Ras suppressor protein 1	1	13.46	3	3712688	3502254	3536648	4637837	424999	311463	236939	444298	25.6	19.9	15	21.4	-1.1	1	-1	1	1.2	0.5	1	1	1.3	0.3	1.3	0.3	0.1
Q$1993	Q9EQH3	VPS35_MOUSE	Vps35	Vacuolar protein sorting-associated protein 35	1	6.78	4	3695958	2142079	3530868	4934496	977334	235275	471004	465237	59.1	24.6	29.8	21.1	-1.7	0.5	-1	0.9	1.3	0.5	1.6	0.1	2.3	0.004	1.4	0.2	0.04
Q$1492	Q62523	ZYX_MOUSE	Zyx	Zyxin	0.9999	14.54	5	3694138	2151805	4444650	5804038	951826	365893	368672	380746	57.6	38	18.5	14.7	-1.7	0.3	1.2	0.5	1.6	0.2	2.1	0.01	2.7	0.0007	1.3	0.1	0.003
Q$1966	Q9DBG5	PLIN3_MOUSE	Plin3	Perilipin-3	1	19.45	5	3686918	2378341	4028577	5154086	628560	397974	459644	480144	38.1	37.4	25.5	20.8	-1.6	0.3	1.1	0.7	1.4	0.3	1.7	0.1	2.2	0.01	1.3	0.3	0.01
Q$578	F6UFG6	F6UFG6_MOUSE	Anp32a	Acidic leucine-rich nuclear phosphoprotein 32 family member A (Fragment)	1	60.14	8	3685240	2827671	4304164	5315214	510058	255932	360244	283812	30.9	20.2	18.7	11.9	-1.3	0.3	1.2	0.4	1.4	0.09	1.5	0.05	1.9	0.001	1.2	0.2	0.002
Q$950	P17710-2	HXK1_MOUSE	Hk	Isoform HK1-SB of Hexokinase-1	1	27.2	16	3681766	2974344	3774536	4267953	617925	318914	436334	387690	37.5	24	25.8	20.3	-1.2	0.8	1	0.9	1.2	0.8	1.3	0.6	1.4	0.2	1.1	0.8	0.3
Q$1513	Q69ZN7	MYOF_MOUSE	Myof	Myoferlin	1	6.01	9	3669668	2548823	3561219	4575954	917822	391567	308198	251588	55.9	34.4	19.4	12.3	-1.4	0.6	-1	0.9	1.2	0.6	1.4	0.3	1.8	0.01	1.3	0.2	0.1
Q$1459	Q61686	CBX5_MOUSE	Cbx5	Chromobox protein homolog 5	1	18.85	4	3669005	3206766	3774284	4571739	717718	667181	551926	667578	43.7	46.5	32.7	32.7	-1.1	0.9	1	0.9	1.2	0.9	1.2	0.9	1.4	0.7	1.2	0.9	0.5
Q$1544	Q6ZQ38	CAND1_MOUSE	Cand1	Cullin-associated NEDD8-dissociated protein 1	0.9683	1.54	1	3652630	2989200	4275950	4797790	243088	246772	296448	387150	14.9	18.5	15.5	18	-1.2	0.3	1.2	0.3	1.3	0.1	1.4	0.05	1.6	0.03	1.1	0.3	0.004
Q$1586	Q8BFR5-2	EFTU_MOUSE	Tuf	Isoform 2 of Elongation factor Tu, mitochondrial	1	20.92	8	3645249	2886153	3808513	4681678	556620	307927	360324	459392	34.1	23.9	21.2	21.9	-1.3	0.5	1	0.8	1.3	0.5	1.3	0.4	1.6	0.07	1.2	0.5	0.07
Q$676	G3X8R0	G3X8R0_MOUSE	Reep5	Receptor accessory protein 5, isoform CRA_a	1	11.11	2	3637774	3151272	4266470	4962150	621993	391493	547578	490697	38.2	27.8	28.7	22.1	-1.2	0.8	1.2	0.8	1.4	0.5	1.4	0.5	1.6	0.1	1.2	0.8	0.1
Q$750	M0QWP9	M0QWP9_MOUSE	Ndufv2	NADH dehydrogenase [ubiquinone] flavoprotein 2, mitochondrial (Fragment)	1	40.68	2	3634311	2870446	3966756	4334201	131339	219130	87674	512886	8.1	17.1	4.9	26.5	-1.3	0.08	1.1	0.2	1.2	0.4	1.4	0.01	1.5	0.1	1.1	0.5	0.02
Q$586	F6VYK1	F6VYK1_MOUSE	Pkd1l1	Polycystic kidney disease protein 1-like 1 (Fragment)	0.9749	3.37	2	3629917	3089376	4804436	5502958	773198	353539	676439	479762	47.6	25.6	31.5	19.5	-1.2	0.7	1.3	0.6	1.5	0.3	1.6	0.2	1.8	0.02	1.1	0.7	0.04
Q$1535	Q6PDM2-2	SRSF1_MOUSE	Srsf	Isoform 2 of Serine/arginine-rich splicing factor 1	1	31.34	5	3627534	3082191	3066714	3806304	1313835	679392	781907	650659	81	49.3	57	38.2	-1.2	1	-1.2	1	1	1	-1	1	1.2	1	1.2	1	0.9
Q$168	D3Z722	D3Z722_MOUSE	Rps19	40S ribosomal protein S19	1	19.34	5	3619638	2710723	4468857	7595485	601938	313460	275971	1553930	37.2	25.9	13.8	45.7	-1.3	0.4	1.2	0.4	2.1	0.2	1.6	0.02	2.8	0.2	1.7	0.3	0.006
Q$87	Q9CQI7	RU2B_MOUSE	Snrpb2	U2 small nuclear ribonucleoprotein B''	0.9999	14.22	2	3619615	3069625	4489980	5058280	270384	229302	305912	360207	16.7	16.7	15.2	15.9	-1.2	0.3	1.2	0.2	1.4	0.05	1.5	0.03	1.6	0.01	1.1	0.3	0.001
Q$1738	Q91VM5	RMXL1_MOUSE	Rbmxl1	RNA binding motif protein, X-linked-like-1	1	15.21	5	3618741	2846766	3863952	4458135	580482	292156	359833	549053	35.9	22.9	20.8	27.5	-1.3	0.7	1.1	0.7	1.2	0.7	1.4	0.3	1.6	0.2	1.2	0.7	0.1
Q$1765	Q922H2	PDK3_MOUSE	Pdk3	[Pyruvate dehydrogenase (acetyl-transferring)] kinase isozyme 3, mitochondrial	0.9999	6.75	3	3617642	3089179	4415262	11086595	696169	536007	666125	5421282	43	38.8	33.7	109.3	-1.2	0.7	1.2	0.7	3.1	0.7	1.4	0.6	3.6	0.7	2.5	0.7	0.2
Q$810	Q8BH40	Q8BH40_MOUSE	Stx7	Syntaxin 7	1	24.9	4	3604965	2261982	4399802	5873133	848087	372077	409648	424387	52.6	36.8	20.8	16.2	-1.6	0.3	1.2	0.4	1.6	0.1	1.9	0.02	2.6	0.001	1.3	0.1	0.002
Q$2074	Q9WUK2-2	IF4H_MOUSE	Eif4	Isoform Short of Eukaryotic translation initiation factor 4H	1	25.88	4	3585643	2490799	4257872	5533347	632966	319099	232828	227169	39.5	28.6	12.2	9.2	-1.4	0.3	1.2	0.3	1.5	0.06	1.7	0.01	2.2	0.0003	1.3	0.02	0.0004
Q$1383	Q3UN88	Q3UN88_MOUSE	Mcpt4	Mast cell protease 4	1	14.23	3	3576573	2849690	4236694	5135988	346073	262735	459468	611059	21.6	20.6	24.3	26.6	-1.3	0.3	1.2	0.5	1.4	0.2	1.5	0.1	1.8	0.05	1.2	0.5	0.01
Q$484	E9PZW0	E9PZW0_MOUSE	Dsp	Desmoplakin	1	2.32	3	3573057	2746966	4642939	6457691	841274	517860	813816	468632	52.6	42.2	39.2	16.2	-1.3	0.6	1.3	0.6	1.8	0.08	1.7	0.3	2.4	0.004	1.4	0.3	0.008
Q$876	P08399	PHXR5_MOUSE	Phxr5	Putative per-hexamer repeat protein 5	0.997	16.52	2	3569420	3023986	7132817	6940794	799958	521968	441776	334543	50.1	38.6	13.8	10.8	-1.2	0.8	2	0.02	1.9	0.02	2.4	0.002	2.3	0.001	-1	0.8	5e-05
Q$1893	Q9CYH6	RRS1_MOUSE	Rrs1	Ribosome biogenesis regulatory protein homolog	0.96	3.29	1	3565355	2173171	2562530	3318694	984916	790340	184901	392142	61.8	81.3	16.1	26.4	-1.6	0.8	-1.4	0.8	-1.1	0.9	1.2	0.9	1.5	0.7	1.3	0.5	0.4
Q$1394	Q501J6-2	DDX17_MOUSE	Ddx1	Isoform 2 of Probable ATP-dependent RNA helicase DDX17	1	20.64	7	3556867	2725587	3741873	5023189	731021	476504	496629	442036	46	39.1	29.7	19.7	-1.3	0.6	1.1	0.8	1.4	0.4	1.4	0.4	1.8	0.05	1.3	0.4	0.06
Q$1777	Q99J77	Q99J77_MOUSE	Nans	N-acetylneuraminic acid synthase (Sialic acid synthase)	1	16.71	3	3554117	2361782	4168411	4827521	553109	274138	351296	284898	34.8	26	18.8	13.2	-1.5	0.3	1.2	0.4	1.4	0.3	1.8	0.02	2	0.001	1.2	0.3	0.002
Q$1902	Q9CZR8	EFTS_MOUSE	Tsfm	Elongation factor Ts, mitochondrial	1	15.12	2	3549390	2856553	3462360	3609263	336443	240349	308930	453975	21.2	18.8	20	28.1	-1.2	0.6	-1	1	1	1	1.2	0.6	1.3	0.6	1	1	0.4
Q$1563	Q7TMK9-2	HNRPQ_MOUSE	Syncri	Isoform 2 of Heterogeneous nuclear ribonucleoprotein Q	1	25.09	9	3546512	2646315	4152325	5521407	800027	504593	558699	492122	50.4	42.6	30.1	19.9	-1.3	0.6	1.2	0.6	1.6	0.3	1.6	0.3	2.1	0.02	1.3	0.3	0.03
Q$1170	P61924	COPZ1_MOUSE	Copz1	Coatomer subunit zeta-1	1	18.64	1	3543920	2934650	3031640	4261410	471655	470714	375878	445096	29.8	35.9	27.7	23.4	-1.2	0.8	-1.2	0.8	1.2	0.8	1	0.9	1.5	0.3	1.4	0.3	0.2
Q$1266	P70697	DCUP_MOUSE	Urod	Uroporphyrinogen decarboxylase	0.9998	6.27	2	3541832	2740500	2771198	3302683	912124	311585	595273	403782	57.6	25.4	48	27.3	-1.3	0.9	-1.3	0.9	-1.1	1	1	1	1.2	0.9	1.2	0.9	0.7
Q$1115	P51863	VA0D1_MOUSE	Atp6v0d1	V-type proton ATPase subunit d 1	0.9992	3.13	1	3535202	3299960	3835490	3888800	713948	617632	487106	402237	45.2	41.9	28.4	23.1	-1.1	1	1.1	1	1.1	1	1.2	1	1.2	1	1	1	0.9
Q$499	E9Q1N8	E9Q1N8_MOUSE	Gm18025	Uncharacterized protein	1	22.79	5	3534485	2885275	4118617	8570469	529831	281636	327426	2663471	33.5	21.8	17.8	69.5	-1.2	0.5	1.2	0.5	2.4	0.4	1.4	0.1	3	0.4	2.1	0.4	0.04
Q$1101	P49718	MCM5_MOUSE	Mcm5	DNA replication licensing factor MCM5	1	15.14	7	3530663	2703449	3678259	5947590	466416	108972	150358	1336770	29.5	9	9.1	50.3	-1.3	0.4	1	0.8	1.7	0.4	1.4	0.005	2.2	0.3	1.6	0.4	0.03
Q$35	A2AFK7	A2AFK7_MOUSE	Eif4a3	Eukaryotic initiation factor 4A-III (Fragment)	1	5.35	2	3523438	2459525	4293169	5637381	872749	589742	692679	656422	55.4	53.6	36.1	26	-1.4	0.6	1.2	0.6	1.6	0.3	1.7	0.3	2.3	0.04	1.3	0.5	0.04
Q$848	P03991	HA1W_MOUSE	H2-K1	H-2 class I histocompatibility antigen, K-W28 alpha chain	1	10.05	3	3509578	2736527	3114808	3499462	599890	467186	353227	307013	38.2	38.2	25.4	19.6	-1.3	0.9	-1.1	0.9	-1	1	1.1	0.9	1.3	0.8	1.1	0.9	0.6
Q$1932	Q9D2G2-2	ODO2_MOUSE	Dls	Isoform 2 of Dihydrolipoyllysine-residue succinyltransferase component of 2-oxoglutarate dehydrogenase complex, mitochondrial	1	14.43	2	3490105	2859272	3554611	3432170	296197	231868	491915	304117	19	18.1	30.9	19.8	-1.2	0.6	1	1	-1	1	1.2	0.7	1.2	0.6	-1	1	0.5
Q$6	P84099	RL19_MOUSE	Rpl19	60S ribosomal protein L19	1	13.27	4	3489893	2753632	4123323	5720204	708436	388648	592029	796883	45.4	31.6	32.1	31.2	-1.3	0.6	1.2	0.6	1.6	0.3	1.5	0.3	2.1	0.06	1.4	0.4	0.03
Q$1929	Q9D1Q6	ERP44_MOUSE	Erp44	Endoplasmic reticulum resident protein 44	1	19.46	4	3448619	3056609	3520707	5199126	269111	269152	233440	867608	17.4	19.7	14.8	37.3	-1.1	0.6	1	0.8	1.5	0.5	1.2	0.5	1.7	0.3	1.5	0.5	0.03
Q$1347	Q3THK7	GUAA_MOUSE	Gmps	GMP synthase [glutamine-hydrolyzing]	1	9.81	4	3437309	4079583	5958913	7850937	265311	616349	266025	417434	17.3	33.8	10	11.9	1.2	0.4	1.7	0.0008	2.3	0.0001	1.5	0.05	1.9	0.004	1.3	0.02	5e-06
Q$967	P20065-2	TYB4_MOUSE	Tmsb4	Isoform Short of Thymosin beta-4	1	43.18	3	3436867	1455467	3690411	5279182	871237	243635	256649	452395	56.7	37.4	15.6	19.2	-2.4	0.2	1.1	0.8	1.5	0.2	2.5	0.001	3.6	0.0004	1.4	0.06	0.001
Q$1124	P53994	RAB2A_MOUSE	Rab2a	Ras-related protein Rab-2A	1	24.53	4	3434305	2994498	4307907	7292703	601892	426729	541664	2033658	39.2	31.9	28.1	62.4	-1.1	0.6	1.3	0.5	2.1	0.4	1.4	0.4	2.4	0.4	1.7	0.5	0.06
Q$1747	Q91Y97	ALDOB_MOUSE	Aldob	Fructose-bisphosphate aldolase B	1	3.57	1	3415630	2420829	3569350	3371600	1189173	634591	1035226	423868	77.9	58.6	64.9	28.1	-1.4	0.9	1	1	-1	1	1.5	0.9	1.4	0.8	-1.1	1	0.8
Q$467	E9PY39	E9PY39_MOUSE	Gm20431	Protein Gm20431	1	14.29	5	3412832	2101007	5061980	5571015	764217	269081	1370705	455914	50.1	28.6	60.5	18.3	-1.6	0.4	1.5	0.5	1.6	0.2	2.4	0.3	2.7	0.001	1.1	0.7	0.03
Q$733	J3QMG5	J3QMG5_MOUSE	Gm5786	Uncharacterized protein	1	22.53	4	3412416	2704371	4166711	5739028	549913	286095	379227	369882	36	23.7	20.4	14.4	-1.3	0.5	1.2	0.5	1.7	0.04	1.5	0.06	2.1	0.001	1.4	0.06	0.0005
Q$2116	S4R1F2	S4R1F2_MOUSE	Anxa4	Annexin	1	48.98	6	3410176	2963678	3967515	3908430	452424	243977	278992	276173	29.7	18.4	15.7	15.8	-1.2	0.8	1.2	0.8	1.1	0.8	1.3	0.1	1.3	0.2	-1	0.9	0.1
Q$1560	Q792Y8	Q792Y8_MOUSE	Gm10334	MCG15081	0.9996	4.07	1	3404833	3477433	3219200	3152050	114271	120967	80460	118955	7.5	7.8	5.6	8.4	1	0.9	-1.1	0.5	-1.1	0.5	-1.1	0.5	-1.1	0.4	-1	0.9	0.2
Q$122	B1AUX2	B1AUX2_MOUSE	Hcfc1	Host cell factor 1	1	3.44	4	3404319	3269253	3377350	4042241	525169	445890	564038	561264	34.5	30.5	37.3	31	-1	1	-1	1	1.2	0.9	1	1	1.2	0.9	1.2	0.9	0.7
Q$133	B7ZN27	B7ZN27_MOUSE	Cad	Cad protein	1	6.92	10	3393435	2626212	3660931	4531982	437997	201097	286386	261799	28.9	17.1	17.5	12.9	-1.3	0.3	1.1	0.6	1.3	0.2	1.4	0.09	1.7	0.003	1.2	0.2	0.005
Q$488	Q99J93	IFM2_MOUSE	Ifitm2	Interferon-induced transmembrane protein 2	1	5.56	1	3382060	2746517	3404303	3910163	317865	252052	215226	239653	21	20.5	14.1	13.7	-1.2	0.5	1	1	1.2	0.5	1.2	0.3	1.4	0.06	1.1	0.5	0.04
Q$238	D3Z1V4	D3Z1V4_MOUSE	Pebp1	Phosphatidylethanolamine-binding protein 1	1	27.75	3	3381748	2313359	3007001	4127175	553193	156488	296463	317538	36.6	15.1	22	17.2	-1.5	0.3	-1.1	0.6	1.2	0.5	1.3	0.3	1.8	0.005	1.4	0.2	0.02
Q$143	B7ZBY7	B7ZBY7_MOUSE	Ube2v1	Ubiquitin-conjugating enzyme E2 variant 1	1	24.28	4	3369987	2068866	5012354	5523374	759022	266318	1372917	456362	50.4	28.8	61.2	18.5	-1.6	0.4	1.5	0.5	1.6	0.2	2.4	0.3	2.7	0.001	1.1	0.7	0.04
Q$1219	P62983	RS27A_MOUSE	Rps27a	Ubiquitin-40S ribosomal protein S27a	1	32.69	4	3363547	2794452	3226547	4232861	270572	154613	187743	363296	18	12.4	13	19.2	-1.2	0.3	-1	0.7	1.3	0.3	1.2	0.3	1.5	0.04	1.3	0.2	0.009
Q$2040	Q9QYA2	TOM40_MOUSE	Tomm40	Mitochondrial import receptor subunit TOM40 homolog	1	19.94	4	3351404	2801321	3132719	4223092	353529	270175	215041	460070	23.6	21.6	15.3	24.4	-1.2	0.6	-1.1	0.6	1.3	0.5	1.1	0.6	1.5	0.2	1.3	0.3	0.05
Q$1161	P62838	UB2D2_MOUSE	Ube2d2	Ubiquitin-conjugating enzyme E2 D2	0.9999	28.57	2	3350796	2037108	4298675	5574970	698197	240134	209623	470971	46.6	26.4	10.9	18.9	-1.6	0.2	1.3	0.3	1.7	0.1	2.1	0.0006	2.7	0.0008	1.3	0.1	0.0004
Q$1649	Q8C605	Q8C605_MOUSE	Pfkp	6-phosphofructokinase	1	13.52	5	3349361	2531526	4334543	4399471	395702	403348	471831	299858	26.4	35.6	24.3	15.2	-1.3	0.4	1.3	0.4	1.3	0.2	1.7	0.09	1.7	0.03	1	0.9	0.01
Q$897	P10922	H10_MOUSE	H1f0	Histone H1.0	1	11.34	2	3335574	2737398	3645498	10849090	537309	633562	677220	6793160	36	51.8	41.5	140	-1.2	0.9	1.1	0.9	3.3	0.9	1.3	0.9	4	0.9	3	0.9	0.3
Q$1659	Q8CDN6	TXNL1_MOUSE	Txnl1	Thioredoxin-like protein 1	1	18.69	3	3325776	2728524	3570805	4545996	318794	305659	93178	421995	21.4	25	5.8	20.8	-1.2	0.4	1.1	0.5	1.4	0.2	1.3	0.2	1.7	0.05	1.3	0.2	0.006
Q$2068	Q9WTP7	KAD3_MOUSE	Ak3	GTP:AMP phosphotransferase AK3, mitochondrial	1	18.5	2	3321834	2976061	3447341	3366958	500314	377707	346550	307641	33.7	28.4	22.5	20.4	-1.1	1	1	1	1	1	1.2	0.9	1.1	0.9	-1	1	0.8
Q$1772	Q923D2	BLVRB_MOUSE	Blvrb	Flavin reductase (NADPH)	1	63.59	8	3305831	2459545	4264003	6153669	660691	421026	605786	535896	44.7	38.3	31.8	19.5	-1.3	0.5	1.3	0.5	1.9	0.05	1.7	0.2	2.5	0.004	1.4	0.2	0.002
Q$1608	Q8BJ71	NUP93_MOUSE	Nup93	Nuclear pore complex protein Nup93	0.9298	1.34	1	3304220	2754630	3321010	3619170	370421	200606	252665	198377	25.1	16.3	17	12.3	-1.2	0.6	1	1	1.1	0.8	1.2	0.5	1.3	0.09	1.1	0.8	0.2
Q$1870	Q9CR98	F136A_MOUSE	Fam136a	Protein FAM136A	0.9999	23.19	2	3302588	2763467	3954665	4944753	394685	301013	389119	763487	26.7	24.4	22	34.5	-1.2	0.6	1.2	0.6	1.5	0.3	1.4	0.2	1.8	0.2	1.3	0.6	0.04
Q$1432	Q61029-3	LAP2B_MOUSE	Tmp	Isoform Epsilon of Lamina-associated polypeptide 2, isoforms beta/delta/epsilon/gamma	1	31.55	9	3293757	2211592	3712735	4841667	716456	286520	356544	280220	48.6	29	21.5	12.9	-1.5	0.4	1.1	0.6	1.5	0.2	1.7	0.05	2.2	0.001	1.3	0.1	0.007
Q$877	P08730-2	K1C13_MOUSE	Krt1	Isoform 2 of Keratin, type I cytoskeletal 13	1	2.89	2	3276909	3702866	3836970	3419044	1469679	1477626	2104322	830989	100.3	89.2	122.6	54.3	1.1	1	1.2	1	1	1	1	1	-1.1	1	-1.1	1	1
Q$1212	P62889	RL30_MOUSE	Rpl30	60S ribosomal protein L30	1	51.3	5	3255789	2764025	3208614	3580371	329925	225909	366980	108286	22.7	18.3	25.6	6.8	-1.2	0.8	-1	0.9	1.1	0.8	1.2	0.8	1.3	0.07	1.1	0.8	0.3
Q$641	P51410	RL9_MOUSE	Rpl9	60S ribosomal protein L9	1	55.21	8	3247720	2190062	3552897	4083102	395939	128669	265227	260137	27.3	13.1	16.7	14.2	-1.5	0.1	1.1	0.5	1.3	0.3	1.6	0.008	1.9	0.001	1.1	0.3	0.002
Q$623	Q64324	STXB2_MOUSE	Stxbp2	Syntaxin-binding protein 2	0.9997	11.64	4	3221917	2695962	3902542	4498818	569134	383537	176576	323785	39.5	31.8	10.1	16.1	-1.2	0.5	1.2	0.5	1.4	0.3	1.4	0.1	1.7	0.04	1.2	0.4	0.02
Q$809	O70435	PSA3_MOUSE	Psma3	Proteasome subunit alpha type-3	0.9922	3.53	1	3214387	2537916	3732344	5234600	826551	818922	823462	756738	57.5	72.2	49.3	32.3	-1.3	0.8	1.2	0.8	1.6	0.4	1.5	0.7	2.1	0.2	1.4	0.6	0.2
Q$2100	Q9Z1Z2	STRAP_MOUSE	Strap	Serine-threonine kinase receptor-associated protein	1	14.57	3	3214191	2802023	3586739	3502986	315884	235685	246406	242114	22	18.8	15.4	15.5	-1.1	0.8	1.1	0.8	1.1	0.8	1.3	0.3	1.3	0.3	-1	0.8	0.2
Q$2036	Q9QXS1-15	PLEC_MOUSE	Ple	Isoform PLEC-1H of Plectin	1	16.48	52	3193737	2670883	3555542	4147834	368275	197245	278210	330480	25.8	16.5	17.5	17.8	-1.2	0.5	1.1	0.5	1.3	0.3	1.3	0.1	1.6	0.03	1.2	0.5	0.02
Q$2071	Q9WU78-3	PDC6I_MOUSE	Pdcd6i	Isoform 3 of Programmed cell death 6-interacting protein	1	20.25	11	3189814	2623270	3411100	3912509	373909	281614	248728	279707	26.2	24	16.3	16	-1.2	0.5	1.1	0.6	1.2	0.5	1.3	0.3	1.5	0.07	1.1	0.5	0.05
Q$1057	P39749	FEN1_MOUSE	Fen1	Flap endonuclease 1	1	14.55	3	3171401	2396656	4503306	4386065	363059	240556	402436	581399	25.6	22.4	20	29.6	-1.3	0.3	1.4	0.1	1.4	0.3	1.9	0.01	1.8	0.07	-1	0.9	0.006
Q$512	E9Q3W4	E9Q3W4_MOUSE	Plec	Plectin	1	16.44	51	3155093	2643185	3516431	4096192	364269	190633	279370	317461	25.8	16.1	17.8	17.3	-1.2	0.5	1.1	0.5	1.3	0.3	1.3	0.2	1.5	0.03	1.2	0.5	0.02
Q$1430	Q61024	ASNS_MOUSE	Asns	Asparagine synthetase [glutamine-hydrolyzing]	1	5.17	2	3152333	2277095	2573987	2596103	702642	390202	115238	154563	49.8	38.3	10	13.3	-1.4	0.9	-1.2	1	-1.2	1	1.1	1	1.1	1	1	1	0.5
Q$667	G3UZ48	G3UZ48_MOUSE	Syncrip	Heterogeneous nuclear ribonucleoprotein Q	1	25.65	8	3146532	2375957	3765577	5040867	694605	452961	510789	415434	49.4	42.6	30.3	18.4	-1.3	0.6	1.2	0.6	1.6	0.2	1.6	0.3	2.1	0.01	1.3	0.3	0.02
Q$121	B1AU75	B1AU75_MOUSE	Nasp	Nuclear autoantigenic sperm protein	1	18.89	7	3140577	2178074	3767129	4462928	569248	243701	475471	288969	40.5	25	28.2	14.5	-1.4	0.4	1.2	0.4	1.4	0.3	1.7	0.09	2	0.002	1.2	0.4	0.009
Q$165	D3YVE6	D3YVE6_MOUSE	Rpl7a-ps10	MCG18601	1	25.19	6	3135916	2650563	3273438	4440614	534603	465191	509484	434857	38.1	39.2	34.8	21.9	-1.2	0.8	1	0.9	1.4	0.4	1.2	0.8	1.7	0.1	1.4	0.4	0.1
Q$1803	Q99L45	IF2B_MOUSE	Eif2s2	Eukaryotic translation initiation factor 2 subunit 2	0.9972	3.02	1	3130550	2566530	3341910	6288130	345644	66898	531649	2956695	24.7	5.8	35.6	105.1	-1.2	0.7	1.1	0.7	2	0.7	1.3	0.7	2.5	0.7	1.9	0.7	0.3
Q$262	D3Z563	D3Z563_MOUSE	Dbi	Acyl-CoA-binding protein	1	44.44	2	3129333	1705962	3625606	5195628	712267	266671	286269	363564	50.9	35	17.7	15.6	-1.8	0.2	1.2	0.5	1.7	0.09	2.1	0.006	3	0.0003	1.4	0.04	0.0005
Q$1520	Q6IFZ6	K2C1B_MOUSE	Krt77	Keratin, type II cytoskeletal 1b	1	8.04	3	3102555	2783682	3194585	3227643	354212	369344	463581	237685	25.5	29.7	32.4	16.5	-1.1	1	1	1	1	1	1.1	1	1.2	0.9	1	1	0.8
Q$1921	Q9D1B9	RM28_MOUSE	Mrpl28	39S ribosomal protein L28, mitochondrial	0.9342	6.61	1	3090130	2975020	3714120	3834170	372891	553534	712475	518275	27	41.6	42.9	30.2	-1	1	1.2	0.9	1.2	0.9	1.2	0.9	1.3	0.9	1	1	0.6
Q$1837	Q9CPY7-2	AMPL_MOUSE	Lap	Isoform 2 of Cytosol aminopeptidase	1	17.83	6	3077994	2504281	3379489	3876991	380208	322698	329552	274897	27.6	28.8	21.8	15.9	-1.2	0.6	1.1	0.6	1.3	0.4	1.3	0.4	1.5	0.07	1.1	0.6	0.06
Q$669	G3UZI2	G3UZI2_MOUSE	Syncrip	Heterogeneous nuclear ribonucleoprotein Q	1	17.65	7	3070681	2295611	3668675	4936417	697357	446795	509961	402486	50.8	43.5	31.1	18.2	-1.3	0.6	1.2	0.6	1.6	0.2	1.6	0.3	2.2	0.01	1.3	0.3	0.02
Q$1712	Q8VC28	AK1CD_MOUSE	Akr1c13	Aldo-keto reductase family 1 member C13	1	22.91	4	3053656	2175199	3445146	4373780	465842	198322	307925	272919	34.1	20.4	20	14	-1.4	0.2	1.1	0.5	1.4	0.2	1.6	0.04	2	0.001	1.3	0.2	0.002
Q$1399	Q5ND04	HSF5_MOUSE	Hsf5	Heat shock factor protein 5	0.9858	8.97	2	3048237	2093557	3820744	4427245	592397	577399	336339	635162	43.5	61.7	19.7	32.1	-1.5	0.6	1.3	0.6	1.5	0.5	1.8	0.2	2.1	0.1	1.2	0.6	0.04
Q$769	O09159	MA2B1_MOUSE	Man2b1	Lysosomal alpha-mannosidase	1	6.02	4	3047533	2356134	3809613	4479208	479749	475651	264645	547244	35.2	45.1	15.5	27.3	-1.3	0.5	1.3	0.5	1.5	0.3	1.6	0.1	1.9	0.1	1.2	0.5	0.02
Q$179	D3YVH7	D3YVH7_MOUSE	Pa2g4	Proliferation-associated protein 2G4 (Fragment)	1	48	9	3042610	2622812	3863594	4648917	400025	194239	330998	370749	29.4	16.6	19.2	17.8	-1.2	0.4	1.3	0.4	1.5	0.07	1.5	0.06	1.8	0.008	1.2	0.4	0.003
Q$153	B9EJ86	B9EJ86_MOUSE	Osbpl8	Oxysterol-binding protein	1	9.79	6	3031613	2388385	3602145	4024674	411820	262607	263714	281729	30.4	24.6	16.4	15.7	-1.3	0.5	1.2	0.5	1.3	0.3	1.5	0.06	1.7	0.02	1.1	0.5	0.01
Q$519	E9QNP0	E9QNP0_MOUSE	Kxd1	KxDL motif-containing protein 1	1	16.38	3	3024163	2491284	2895326	3778057	235654	154011	156016	360889	17.4	13.8	12	21.4	-1.2	0.3	-1	0.7	1.2	0.3	1.2	0.3	1.5	0.07	1.3	0.2	0.01
Q$1895	Q9CYL5	GAPR1_MOUSE	Glipr2	Golgi-associated plant pathogenesis-related protein 1	1	31.17	3	3020917	2605566	3560604	4471470	517768	524016	498762	209425	38.3	45	31.3	10.5	-1.2	0.7	1.2	0.7	1.5	0.1	1.4	0.5	1.7	0.06	1.3	0.4	0.06
Q$174	D3YUT9	D3YUT9_MOUSE	S100a4	Protein S100-A4	0.9997	41.58	1	2999565	2372620	4540835	4191260	522232	237586	387561	371651	38.9	22.4	19.1	19.8	-1.3	0.5	1.5	0.2	1.4	0.3	1.9	0.008	1.8	0.02	-1.1	0.5	0.004
Q$1750	Q91YR7	PRP6_MOUSE	Prpf6	Pre-mRNA-processing factor 6	1	5.42	4	2999565	2618119	3135905	5214290	539619	395999	338319	1778550	40.2	33.8	24.1	76.3	-1.1	0.8	1	0.8	1.7	0.8	1.2	0.8	2	0.8	1.7	0.8	0.3
Q$544	E9QA93	E9QA93_MOUSE	Alox5	Arachidonate 5-lipoxygenase	1	8.1	4	2999151	2466717	2881764	3103958	379126	291862	130916	275142	28.3	26.5	10.2	19.8	-1.2	0.8	-1	1	1	1	1.2	0.7	1.3	0.6	1.1	0.9	0.4
Q$1359	Q3TXS7	PSMD1_MOUSE	Psmd1	26S proteasome non-ATPase regulatory subunit 1	0.9998	2.41	2	2989984	2326754	3594025	4285250	494929	295297	235300	164984	37	28.4	14.6	8.6	-1.3	0.5	1.2	0.5	1.4	0.1	1.5	0.05	1.8	0.002	1.2	0.1	0.004
Q$1518	Q6GT24	Q6GT24_MOUSE	Prdx6	Peroxiredoxin 6	1	35.71	5	2988921	2147137	3254486	3893864	403411	191859	190835	163085	30.2	20	13.1	9.4	-1.4	0.2	1.1	0.6	1.3	0.2	1.5	0.02	1.8	0.0007	1.2	0.1	0.002
Q$2105	Q9Z2I9	SUCB1_MOUSE	Sucla2	Succinyl-CoA ligase [ADP-forming] subunit beta, mitochondrial	0.9996	4.75	2	2981030	3064070	2521080	2669428	283745	269049	360413	323445	21.3	19.6	32	27.1	1	0.9	-1.2	0.9	-1.1	0.9	-1.2	0.8	-1.1	0.9	1.1	0.9	0.6
Q$1449	Q61263	SOAT1_MOUSE	Soat1	Sterol O-acyltransferase 1	0.9165	2.78	1	2975270	2970580	3837850	3621320	431747	320055	204141	559173	32.4	24.1	11.9	34.5	-1	1	1.3	0.4	1.2	0.8	1.3	0.3	1.2	0.8	-1.1	0.9	0.3
Q$1448	Q61245-2	COBA1_MOUSE	Col11a	Isoform Short of Collagen alpha-1(XI) chain	0.9692	3.43	1	2974960	2696715	3186915	2501645	179090	100696	179167	228812	13.5	8.3	12.6	20.5	-1.1	0.5	1.1	0.7	-1.2	0.5	1.2	0.2	-1.1	0.7	-1.3	0.2	0.07
Q$639	G3UVV3	G3UVV3_MOUSE	Zfp407	MCG1556, isoform CRA_b	0.9468	1.56	1	2966410	2053500	3481670	4407030	457815	196027	343349	363170	34.5	21.3	22.1	18.4	-1.4	0.3	1.2	0.4	1.5	0.1	1.7	0.03	2.1	0.003	1.3	0.3	0.002
Q$1318	Q02844	TRYB1_MOUSE	Tpsab1	Tryptase	1	15.75	2	2965801	1700941	2785152	3925537	441691	181098	281760	502492	33.3	23.8	22.6	28.6	-1.7	0.1	-1.1	0.7	1.3	0.3	1.6	0.06	2.3	0.02	1.4	0.2	0.006
Q$805	O70194	EIF3D_MOUSE	Eif3d	Eukaryotic translation initiation factor 3 subunit D	1	8.03	3	2964679	2390932	3666431	5026036	542261	259124	378868	469542	40.9	24.2	23.1	20.9	-1.2	0.5	1.2	0.5	1.7	0.1	1.5	0.1	2.1	0.007	1.4	0.2	0.003
Q$2049	Q9QZM0	UBQL2_MOUSE	Ubqln2	Ubiquilin-2	0.9998	4.86	2	2956434	1929294	2891694	3564078	711524	291302	447059	440182	53.8	33.8	34.6	27.6	-1.5	0.6	-1	0.9	1.2	0.7	1.5	0.4	1.8	0.09	1.2	0.7	0.2
Q$1609	Q8BJS4-2	SUN2_MOUSE	Sun	Isoform 2 of SUN domain-containing protein 2	1	13.31	7	2954415	2440351	3363796	4349008	433684	185091	282033	361677	32.8	17	18.7	18.6	-1.2	0.5	1.1	0.5	1.5	0.1	1.4	0.1	1.8	0.009	1.3	0.2	0.006
Q$816	O88374	O88374_MOUSE	Bcat2	Branched-chain-amino-acid aminotransferase	1	13.88	3	2951099	2715506	2714545	3256441	279524	89452	75270	240682	21.2	7.4	6.2	16.5	-1.1	0.9	-1.1	0.9	1.1	0.9	-1	1	1.2	0.3	1.2	0.4	0.2
Q$682	G3X9Q0	G3X9Q0_MOUSE	Mbnl1	Muscleblind-like 1 (Drosophila), isoform CRA_a	0.9998	20.21	4	2947669	2491643	3040933	3470477	305243	130950	248992	231428	23.2	11.8	18.3	14.9	-1.2	0.6	1	0.8	1.2	0.6	1.2	0.4	1.4	0.04	1.1	0.6	0.07
Q$147	B7ZCP4	B7ZCP4_MOUSE	Cpne1	Copine-1	0.9996	6.04	3	2933041	2261866	2998948	3288813	539175	334941	519353	198956	41.1	33.1	38.7	13.5	-1.3	0.8	1	0.9	1.1	0.9	1.3	0.8	1.5	0.2	1.1	0.9	0.4
Q$1961	Q9DB05	SNAA_MOUSE	Napa	Alpha-soluble NSF attachment protein	1	12.2	3	2932086	2266052	2999974	3662042	408033	226683	313764	296861	31.1	22.4	23.4	18.1	-1.3	0.5	1	0.9	1.2	0.5	1.3	0.4	1.6	0.03	1.2	0.5	0.05
Q$945	P17426-2	AP2A1_MOUSE	Ap2a	Isoform B of AP-2 complex subunit alpha-1	1	5.13	3	2922393	2204807	3706182	4296271	738539	563264	604288	507708	56.5	57.1	36.5	26.4	-1.3	0.8	1.3	0.8	1.5	0.5	1.7	0.4	1.9	0.1	1.2	0.8	0.1
Q$684	G3X9V0	G3X9V0_MOUSE	Psme2	MCG22048, isoform CRA_a	0.9999	30.3	5	2921640	2322310	3353452	3459470	252040	66016	332844	234333	19.3	6.4	22.2	15.1	-1.3	0.3	1.1	0.6	1.2	0.4	1.4	0.2	1.5	0.04	1	0.8	0.02
Q$800	O55135	IF6_MOUSE	Eif6	Eukaryotic translation initiation factor 6	0.9985	9.8	1	2915120	2400480	3208170	3612190	377088	278518	220086	233380	28.9	25.9	15.3	14.4	-1.2	0.6	1.1	0.6	1.2	0.5	1.3	0.2	1.5	0.06	1.1	0.6	0.05
Q$990	P25911-2	LYN_MOUSE	Ly	Isoform 2 of Tyrosine-protein kinase Lyn	0.9998	11	4	2910669	2758669	3413887	3355777	138070	147370	291571	369529	10.6	11.9	19.1	24.6	-1.1	0.7	1.2	0.6	1.2	0.6	1.2	0.4	1.2	0.6	-1	0.9	0.2
Q$622	F8VPY2	F8VPY2_MOUSE	Taf5	Transcription initiation factor TFIID subunit 5	0.9994	11.86	3	2908611	2670839	4718249	9257096	234506	512413	1938333	4228306	18	42.9	91.9	102.1	-1.1	0.8	1.6	0.8	3.2	0.7	1.8	0.8	3.5	0.7	2	0.8	0.2
Q$811	O70456	1433S_MOUSE	Sfn	14-3-3 protein sigma	1	23.39	4	2907174	2562048	3037920	3496328	347620	284597	729617	557118	26.7	24.8	53.7	35.6	-1.1	0.9	1	0.9	1.2	0.9	1.2	0.9	1.4	0.7	1.2	0.9	0.6
Q$1433	Q61033	LAP2A_MOUSE	Tmpo	Lamina-associated polypeptide 2, isoforms alpha/zeta	1	16.88	8	2897736	1957530	3255943	4263202	606424	265771	318925	202366	46.8	30.4	21.9	10.6	-1.5	0.3	1.1	0.6	1.5	0.2	1.7	0.07	2.2	0.0007	1.3	0.1	0.005
Q$1478	Q9D8L3	Q9D8L3_MOUSE	Ssr4	Signal sequence receptor, delta	1	30.64	4	2889684	2101856	3430863	4575087	563515	306781	366973	239503	43.6	32.6	23.9	11.7	-1.4	0.4	1.2	0.4	1.6	0.1	1.6	0.1	2.2	0.001	1.3	0.1	0.003
Q$1816	Q99MD9-2	NASP_MOUSE	Nas	Isoform 2 of Nuclear autoantigenic sperm protein	1	25.18	5	2887896	1973476	3503354	4140127	544709	215885	449659	268096	42.2	24.5	28.7	14.5	-1.5	0.4	1.2	0.5	1.4	0.3	1.8	0.07	2.1	0.001	1.2	0.5	0.009
Q$1871	Q9CRC8	LRC40_MOUSE	Lrrc40	Leucine-rich repeat-containing protein 40	0.964	1.16	1	2878629	2915599	1595295	49210406	796789	2353618	409578	41991188	61.9	180.5	57.4	190.8	1	1	-1.8	0.7	17.1	0.9	-1.8	0.9	16.9	0.9	30.8	0.9	0.3
Q$1815	Q99M87-2	DNJA3_MOUSE	Dnaja	Isoform 2 of DnaJ homolog subfamily A member 3, mitochondrial	0.9626	2.65	1	2876120	3153160	3868893	4134550	490727	421428	607193	497262	38.2	29.9	35.1	26.9	1.1	0.9	1.3	0.7	1.4	0.5	1.2	0.7	1.3	0.6	1.1	0.9	0.3
Q$1918	Q9D154	ILEUA_MOUSE	Serpinb1a	Leukocyte elastase inhibitor A	0.9999	10.55	3	2875546	1912272	3499622	4050711	690980	347568	398905	450825	53.7	40.6	25.5	24.9	-1.5	0.6	1.2	0.6	1.4	0.6	1.8	0.08	2.1	0.03	1.2	0.6	0.04
Q$1939	Q9D6J5	NDUB8_MOUSE	Ndufb8	NADH dehydrogenase [ubiquinone] 1 beta subcomplex subunit 8, mitochondrial	0.9975	14.52	2	2875282	2492791	2968031	3242013	167304	137785	115925	292785	13	12.4	8.7	20.2	-1.2	0.4	1	0.7	1.1	0.7	1.2	0.2	1.3	0.2	1.1	0.7	0.09
Q$2066	Q9WTM5	RUVB2_MOUSE	Ruvbl2	RuvB-like 2	0.9998	4.54	2	2874208	1777538	3330862	4076632	404199	184941	224635	422949	31.4	23.3	15.1	23.2	-1.6	0.1	1.2	0.4	1.4	0.2	1.9	0.004	2.3	0.005	1.2	0.3	0.001
Q$1284	P97311	MCM6_MOUSE	Mcm6	DNA replication licensing factor MCM6	1	9.38	7	2873784	2444764	3063278	3353255	317006	237588	272911	236460	24.7	21.7	19.9	15.8	-1.2	0.7	1.1	0.7	1.2	0.7	1.3	0.5	1.4	0.1	1.1	0.7	0.2
Q$1501	Q64310	SURF4_MOUSE	Surf4	Surfeit locus protein 4	1	10.41	2	2864170	2375498	2974676	3000926	483408	352567	240143	340106	37.7	33.2	18.1	25.3	-1.2	0.9	1	1	1	1	1.3	0.7	1.3	0.7	1	1	0.6
Q$42	A2AH25	A2AH25_MOUSE	Arhgap1	Rho GTPase-activating protein 1	0.9991	3.76	1	2857165	2392745	2199200	3036245	690174	330878	366510	441211	54	30.9	37.3	32.5	-1.2	0.9	-1.3	0.9	1.1	0.9	-1.1	0.9	1.3	0.8	1.4	0.7	0.6
Q$1613	Q8BK64	AHSA1_MOUSE	Ahsa1	Activator of 90 kDa heat shock protein ATPase homolog 1	0.9978	10.06	2	2854465	1757580	3270235	3956539	541380	217973	513878	331491	42.4	27.7	35.1	18.7	-1.6	0.3	1.1	0.6	1.4	0.3	1.9	0.1	2.3	0.003	1.2	0.5	0.01
Q$907	P11679	K2C8_MOUSE	Krt8	Keratin, type II cytoskeletal 8	1	7.14	3	2847982	3395057	4504877	4212742	598510	1101116	1310284	376540	47	72.5	65	20	1.2	0.9	1.6	0.8	1.5	0.4	1.3	0.9	1.2	0.9	-1.1	0.9	0.6
Q$643	G3UW85	G3UW85_MOUSE	Erh	ATP-dependent RNA helicase DDX3X	1	39.02	3	2842082	2068400	3266730	3868190	442682	151584	418123	205446	34.8	16.4	28.6	11.9	-1.4	0.4	1.1	0.5	1.4	0.2	1.6	0.1	1.9	0.0006	1.2	0.4	0.01
Q$612	Q60668-2	HNRPD_MOUSE	Hnrnp	Isoform 2 of Heterogeneous nuclear ribonucleoprotein D0	1	23.81	7	2842033	2213268	3098936	7972861	526828	234942	202727	3848179	41.5	23.7	14.6	107.9	-1.3	0.7	1.1	0.7	2.8	0.7	1.4	0.1	3.6	0.7	2.6	0.7	0.2
Q$1547	Q6ZWM4	NAA38_MOUSE	Naa38	N-alpha-acetyltransferase 38, NatC auxiliary subunit	0.9998	61.46	3	2840172	2646884	3276837	3975706	322297	386027	246573	307205	25.4	32.6	16.8	17.3	-1.1	0.7	1.2	0.5	1.4	0.2	1.2	0.5	1.5	0.2	1.2	0.4	0.04
Q$275	D3Z7C6	D3Z7C6_MOUSE	Ptges3	Prostaglandin E synthase 3	1	24.62	3	2833262	2183098	3872410	4943367	472756	115365	825645	701500	37.3	11.8	47.7	31.7	-1.3	0.6	1.4	0.6	1.7	0.2	1.8	0.4	2.3	0.09	1.3	0.6	0.02
Q$1793	Q99KJ6	Q99KJ6_MOUSE	Gusb	Beta-glucuronidase	1	8.4	2	2819400	2216899	3379215	4337210	608985	398092	507791	363282	48.3	40.2	33.6	18.7	-1.3	0.7	1.2	0.7	1.5	0.3	1.5	0.4	2	0.03	1.3	0.4	0.04
Q$778	Q9D8S5	Q9D8S5_MOUSE	Srsf5	MCG7614, isoform CRA_c	1	7.78	2	2819350	2389283	3198032	3925917	359408	259318	318219	334534	28.5	24.3	22.2	19.1	-1.2	0.6	1.1	0.6	1.4	0.2	1.3	0.3	1.6	0.04	1.2	0.4	0.02
Q$1862	Q9CQX2	CYB5B_MOUSE	Cyb5b	Cytochrome b5 type B	1	33.56	3	2817160	2108967	2940377	4044857	378106	292722	147891	354719	30	31	11.2	19.6	-1.3	0.3	1	0.8	1.4	0.1	1.4	0.1	1.9	0.02	1.4	0.1	0.004
Q$450	E9PV04	E9PV04_MOUSE	Gm8994	Protein Gm8994	1	2.43	1	2816900	2016285	4358650	6193630	558023	316199	460782	1020493	44.3	35.1	23.6	36.8	-1.4	0.3	1.5	0.2	2.2	0.08	2.2	0.02	3.1	0.06	1.4	0.3	0.002
Q$1460	Q61696	HS71A_MOUSE	Hspa1a	Heat shock 70 kDa protein 1A	1	6.08	2	2816722	1852800	3160138	3613476	519850	289366	435020	479699	41.3	34.9	30.8	29.7	-1.5	0.5	1.1	0.8	1.3	0.6	1.7	0.2	2	0.08	1.1	0.8	0.07
Q$796	O54962	BAF_MOUSE	Banf1	Barrier-to-autointegration factor	1	44.94	3	2815186	1830891	2827371	3861832	582576	136584	294910	407805	46.3	16.7	23.3	23.6	-1.5	0.4	1	1	1.4	0.4	1.5	0.07	2.1	0.009	1.4	0.3	0.02
Q$2111	Q9Z2W0	DNPEP_MOUSE	Dnpep	Aspartyl aminopeptidase	1	14.8	3	2811373	2098510	3983306	4559960	437634	324066	438519	299235	34.8	34.5	24.6	14.7	-1.3	0.4	1.4	0.3	1.6	0.04	1.9	0.04	2.2	0.003	1.1	0.4	0.001
Q$711	Q1HFZ0-2	NSUN2_MOUSE	Nsun	Isoform 2 of tRNA (cytosine(34)-C(5))-methyltransferase	1	11.14	5	2800683	2103776	2891330	4016481	663237	306723	521201	343492	53	32.6	40.3	19.1	-1.3	0.6	1	0.9	1.4	0.5	1.4	0.5	1.9	0.02	1.4	0.4	0.08
Q$279	D3Z7P3-2	GLSK_MOUSE	Gl	Isoform 2 of Glutaminase kidney isoform, mitochondrial	0.9995	9.62	3	2786578	2091931	3234683	4499206	435073	266408	185913	229457	34.9	28.5	12.9	11.4	-1.3	0.4	1.2	0.4	1.6	0.03	1.5	0.03	2.2	0.0008	1.4	0.01	0.0002
Q$1820	Q99P58	RB27B_MOUSE	Rab27b	Ras-related protein Rab-27B	1	10.55	3	2784839	2329244	2737888	2290080	194913	249327	226455	279428	15.7	23.9	18.5	27.3	-1.2	0.7	-1	1	-1.2	0.7	1.2	0.7	-1	1	-1.2	0.7	0.3
Q$1082	Q5RKN9	Q5RKN9_MOUSE	Capza1	Capping protein (Actin filament) muscle Z-line, alpha 1	1	31.47	4	2783728	1982885	2990225	3472818	486694	277335	377765	443549	39.1	31.3	28.2	28.6	-1.4	0.6	1.1	0.7	1.2	0.7	1.5	0.3	1.8	0.1	1.2	0.7	0.1
Q$996	Q3KQM4	Q3KQM4_MOUSE	U2af2	Splicing factor U2AF 65 kDa subunit	1	28.01	5	2781330	2332383	2822611	3504692	375223	348874	251302	261069	30.2	33.4	19.9	16.7	-1.2	0.6	1	0.9	1.3	0.5	1.2	0.6	1.5	0.2	1.2	0.4	0.1
Q$81	Q9EQU5-2	SET_MOUSE	Se	Isoform 2 of Protein SET	1	24.91	6	2779292	2007876	3035869	3853099	510879	257763	419390	312764	41.1	28.7	30.9	18.2	-1.4	0.4	1.1	0.7	1.4	0.4	1.5	0.3	1.9	0.01	1.3	0.4	0.03
Q$1955	Q9D8T2	GSDMD_MOUSE	Gsdmdc1	Gasdermin-D	0.959	2.46	1	2761750	1687640	2870529	4561060	891759	208295	423491	713736	72.2	27.6	33	35	-1.6	0.5	1	0.9	1.7	0.4	1.7	0.2	2.7	0.08	1.6	0.3	0.03
Q$1617	Q8BL97-2	SRSF7_MOUSE	Srsf	Isoform 2 of Serine/arginine-rich splicing factor 7	1	12.61	4	2759227	2342674	3200812	3571916	240339	125342	184995	209357	19.5	12	12.9	13.1	-1.2	0.4	1.2	0.4	1.3	0.1	1.4	0.02	1.5	0.006	1.1	0.4	0.002
Q$1684	Q8K310	MATR3_MOUSE	Matr3	Matrin-3	1	12.65	7	2756149	2502859	3256627	4253277	354815	305371	358601	567977	28.8	27.3	24.6	29.9	-1.1	0.6	1.2	0.6	1.5	0.2	1.3	0.5	1.7	0.1	1.3	0.5	0.04
Q$1696	Q8R0W0	EPIPL_MOUSE	Eppk1	Epiplakin	1	0.29	1	2751475	1929760	3083390	4033150	733733	281371	336551	467326	59.6	32.6	24.4	25.9	-1.4	0.5	1.1	0.7	1.5	0.4	1.6	0.1	2.1	0.03	1.3	0.4	0.05
Q$1388	Q3UZ39	LRRF1_MOUSE	Lrrfip1	Leucine-rich repeat flightless-interacting protein 1	0.9989	6.04	2	2745746	1487085	3496518	4880367	850516	396723	566047	377300	69.3	59.7	36.2	17.3	-1.8	0.4	1.3	0.5	1.8	0.2	2.4	0.09	3.3	0.002	1.4	0.2	0.006
Q$937	P16381	DDX3L_MOUSE	D1Pas1	Putative ATP-dependent RNA helicase Pl10	1	15.91	8	2737974	2181801	3223639	3804517	354565	184751	292587	112338	29	18.9	20.3	6.6	-1.3	0.4	1.2	0.4	1.4	0.1	1.5	0.08	1.7	0.0004	1.2	0.3	0.002
Q$2045	Q9QZ82	CP11A_MOUSE	Cyp11a1	Cholesterol side-chain cleavage enzyme, mitochondrial	1	9.7	4	2725367	2796025	2802428	3931701	311125	306228	234630	657383	25.5	24.5	18.7	37.4	1	1	1	1	1.4	0.6	1	1	1.4	0.6	1.4	0.6	0.2
Q$268	D3Z6I8	D3Z6I8_MOUSE	Tpm3	Tropomyosin alpha-3 chain	1	28.34	10	2721983	1852189	3037520	3943102	273747	208451	214750	239996	22.5	25.2	15.8	13.6	-1.5	0.07	1.1	0.4	1.4	0.04	1.6	0.02	2.1	0.001	1.3	0.07	0.0001
Q$986	P24638	PPAL_MOUSE	Acp2	Lysosomal acid phosphatase	0.981	11.11	1	2714490	3220450	2751130	2400877	474754	623280	391134	385301	39.1	43.3	31.8	35.9	1.2	1	1	1	-1.1	1	-1.2	1	-1.3	0.9	-1.1	1	0.7
Q$1864	Q9CR16	PPID_MOUSE	Ppid	Peptidyl-prolyl cis-trans isomerase D	1	15.14	3	2702797	2171613	3625712	4267005	295362	158282	265809	287957	24.4	16.3	16.4	15.1	-1.2	0.3	1.3	0.1	1.6	0.02	1.7	0.008	2	0.001	1.2	0.3	0.0001
Q$2019	Q9JJI8	RL38_MOUSE	Rpl38	60S ribosomal protein L38	0.9961	18.57	1	2693846	2469876	4829820	5696120	714531	415290	583428	459179	59.3	37.6	27	18	-1.1	0.8	1.8	0.1	2.1	0.04	2	0.04	2.3	0.005	1.2	0.5	0.002
Q$971	P20491	FCERG_MOUSE	Fcer1g	High affinity immunoglobulin epsilon receptor subunit gamma	1	30.23	3	2693583	2033517	3067496	4029973	425495	250535	349205	392725	35.3	27.5	25.5	21.8	-1.3	0.4	1.1	0.5	1.5	0.2	1.5	0.2	2	0.02	1.3	0.3	0.01
Q$1505	Q64445	COX8A_MOUSE	Cox8a	Cytochrome c oxidase subunit 8A, mitochondrial	0.986	49.28	1	2693120	2640100	3086170	3188940	441186	316558	378300	661812	36.6	26.8	27.4	46.4	-1	1	1.1	1	1.2	1	1.2	0.9	1.2	1	1	1	0.8
Q$1643	Q8C181-2	MBNL2_MOUSE	Mbnl	Isoform 2 of Muscleblind-like protein 2	0.9998	12.39	3	2681528	2330394	2722589	2969817	257428	119750	233928	195467	21.5	11.5	19.2	14.7	-1.2	0.7	1	0.9	1.1	0.8	1.2	0.6	1.3	0.1	1.1	0.8	0.2
Q$1756	Q91ZW3	SMCA5_MOUSE	Smarca5	SWI/SNF-related matrix-associated actin-dependent regulator of chromatin subfamily A member 5	1	5.04	4	2678612	2112663	3272737	4158727	452296	329593	290025	380495	37.8	34.9	19.8	20.5	-1.3	0.5	1.2	0.5	1.6	0.1	1.5	0.1	2	0.02	1.3	0.3	0.008
Q$1592	Q8BGD9	IF4B_MOUSE	Eif4b	Eukaryotic translation initiation factor 4B	0.9992	6.71	2	2678061	2935874	2888729	3353814	367108	341573	306934	341929	30.7	26	23.8	22.8	1.1	0.9	1.1	0.9	1.3	0.8	-1	0.9	1.1	0.9	1.2	0.9	0.6
Q$261	D3Z536	D3Z536_MOUSE	Gm8225	Protein Gm8225	1	8.56	2	2669060	2097282	2869490	3408757	411217	274633	401179	470457	34.5	29.3	31.3	30.9	-1.3	0.7	1.1	0.7	1.3	0.7	1.4	0.6	1.6	0.2	1.2	0.7	0.2
Q$1636	Q8BW75	AOFB_MOUSE	Maob	Amine oxidase [flavin-containing] B	1	8.85	5	2664105	2016676	2645185	2663183	374426	458490	608603	344968	31.4	50.8	51.4	29	-1.3	0.9	-1	1	-1	1	1.3	0.9	1.3	0.9	1	1	0.7
Q$814	O88207	CO5A1_MOUSE	Col5a1	Collagen alpha-1(V) chain	0.9933	5.71	2	2647648	2831019	2611325	3604428	639613	505734	499790	746048	54	39.9	42.8	46.3	1.1	1	-1	1	1.4	0.9	-1.1	1	1.3	0.9	1.4	0.9	0.6
Q$981	P23492	PNPH_MOUSE	Pnp	Purine nucleoside phosphorylase	1	35.29	6	2646636	2017949	2927066	3624058	403922	179856	257850	234001	34.1	19.9	19.7	14.4	-1.3	0.3	1.1	0.6	1.4	0.3	1.5	0.1	1.8	0.004	1.2	0.3	0.008
Q$912	P12382	K6PL_MOUSE	Pfkl	6-phosphofructokinase, liver type	1	5.77	3	2645728	2021994	2630837	3470160	617202	354453	388398	430567	52.2	39.2	33	27.7	-1.3	0.7	-1	1	1.3	0.7	1.3	0.7	1.7	0.2	1.3	0.6	0.2
Q$939	P16627	HS71L_MOUSE	Hspa1l	Heat shock 70 kDa protein 1-like	1	1.87	1	2637160	1701670	2978873	3422943	500688	298890	432668	479406	42.5	39.3	32.5	31.3	-1.5	0.5	1.1	0.8	1.3	0.6	1.8	0.2	2	0.09	1.1	0.8	0.07
Q$1431	Q61029-2	LAP2B_MOUSE	Tmp	Isoform Delta of Lamina-associated polypeptide 2, isoforms beta/delta/epsilon/gamma	1	31.32	8	2623388	1820549	2969995	3896327	524930	213355	244809	195512	44.7	26.2	18.4	11.2	-1.4	0.4	1.1	0.6	1.5	0.1	1.6	0.04	2.1	0.0006	1.3	0.07	0.003
Q$479	E9PZC3	E9PZC3_MOUSE	Blvrb	Flavin reductase (NADPH)	1	38.46	6	2614567	1880005	3541709	5316979	580797	349973	538253	598990	49.7	41.6	34	25.2	-1.4	0.5	1.4	0.5	2	0.06	1.9	0.1	2.8	0.007	1.5	0.2	0.002
Q$2058	Q9R190	MTA2_MOUSE	Mta2	Metastasis-associated protein MTA2	0.9999	1.5	1	2601890	2165750	2782200	2637620	316619	318494	344809	357386	27.2	32.9	27.7	30.3	-1.2	0.9	1.1	1	1	1	1.3	0.8	1.2	0.9	-1.1	1	0.6
Q$2083	Q9WVA2	TIM8A_MOUSE	Timm8a1	Mitochondrial import inner membrane translocase subunit Tim8 A	0.9989	26.8	2	2596753	1963457	3004155	3411488	267921	98157	211714	647954	23.1	11.2	15.8	42.5	-1.3	0.3	1.2	0.6	1.3	0.6	1.5	0.01	1.7	0.3	1.1	0.6	0.07
Q$1843	Q9CQ60	6PGL_MOUSE	Pgls	6-phosphogluconolactonase	1	29.57	3	2591019	2337113	2792424	3407200	379511	313557	248630	270170	32.8	30	19.9	17.7	-1.1	0.9	1.1	0.9	1.3	0.5	1.2	0.6	1.5	0.2	1.2	0.5	0.1
Q$2032	Q9QUM9	PSA6_MOUSE	Psma6	Proteasome subunit alpha type-6	1	32.52	4	2588314	2114721	3017678	4486857	542049	347169	353550	961023	46.8	36.7	26.2	47.9	-1.2	0.7	1.2	0.7	1.7	0.4	1.4	0.4	2.1	0.3	1.5	0.5	0.07
Q$290	D6RE43	D6RE43_MOUSE	Rpl10a	60S ribosomal protein L10a	1	36.21	2	2586360	2229052	3585627	3366325	343926	259661	863499	316517	29.7	26	53.8	21	-1.2	0.7	1.4	0.7	1.3	0.5	1.6	0.6	1.5	0.1	-1.1	0.8	0.2
Q$899	P11087	CO1A1_MOUSE	Col1a1	Collagen alpha-1(I) chain	0.9883	5.99	2	2578684	1481082	3280675	3468120	478104	206741	170500	263142	41.5	31.2	11.6	17	-1.7	0.2	1.3	0.4	1.3	0.4	2.2	0.0009	2.3	0.002	1.1	0.6	0.001
Q$730	J3QK72	J3QK72_MOUSE	Gm7729	Uncharacterized protein	1	21.56	7	2578441	2084449	2680985	3774713	467541	223570	277147	305067	40.5	24	23.1	18.1	-1.2	0.6	1	0.9	1.5	0.2	1.3	0.3	1.8	0.01	1.4	0.1	0.02
Q$123	B1AVK5	B1AVK5_MOUSE	Col4a6	Protein Col4a6	0.9905	2.48	1	2569850	2135890	2397740	2823600	145164	147913	182244	232967	12.6	15.5	17	18.4	-1.2	0.3	-1.1	0.7	1.1	0.7	1.1	0.7	1.3	0.2	1.2	0.6	0.09
Q$1	A1BN54	A1BN54_MOUSE	Actn1	Alpha actinin 1a	1	9.58	6	2569309	1894741	2618603	3433188	374985	166723	141914	191396	32.6	19.7	12.1	12.5	-1.4	0.3	1	0.9	1.3	0.2	1.4	0.04	1.8	0.002	1.3	0.04	0.003
Q$1225	P63037	DNJA1_MOUSE	Dnaja1	DnaJ homolog subfamily A member 1	1	6.55	2	2559984	2280350	2873252	3395752	514273	544020	554896	182662	44.9	53.3	43.2	12	-1.1	0.9	1.1	0.9	1.3	0.6	1.3	0.9	1.5	0.4	1.2	0.9	0.4
Q$645	G3UWD7	G3UWD7_MOUSE	Gm10269	MCG123152	0.9989	10.57	2	2552575	1721131	3051343	4111421	216266	150180	316225	355726	18.9	19.5	23.2	19.3	-1.5	0.04	1.2	0.2	1.6	0.03	1.8	0.03	2.4	0.002	1.3	0.1	0.0001
Q$112	P61255	RL26_MOUSE	Rpl26	60S ribosomal protein L26	0.9975	5.52	1	2549850	1876405	2769675	3915215	492827	350184	296373	456961	43.2	41.7	23.9	26.1	-1.4	0.5	1.1	0.7	1.5	0.3	1.5	0.3	2.1	0.04	1.4	0.3	0.02
Q$823	O88593	PGRP1_MOUSE	Pglyrp1	Peptidoglycan recognition protein 1	0.9992	19.78	2	2544440	1761491	2235192	2650368	491164	141957	257330	265570	43.2	18	25.7	22.4	-1.4	0.6	-1.1	0.8	1	0.9	1.3	0.5	1.5	0.1	1.2	0.6	0.2
Q$556	E9QMV2	E9QMV2_MOUSE	Abracl	Costars family protein ABRACL	1	27.16	3	2530069	1405280	2564878	3861357	482578	153799	179569	248443	42.7	24.5	15.7	14.4	-1.8	0.2	1	0.9	1.5	0.1	1.8	0.006	2.7	0.0002	1.5	0.01	0.0003
Q$1875	Q9CVB6	ARPC2_MOUSE	Arpc2	Actin-related protein 2/3 complex subunit 2	1	24	6	2523218	1960181	2943810	3255992	381525	189051	275508	219284	33.8	21.6	20.9	15.1	-1.3	0.5	1.2	0.6	1.3	0.4	1.5	0.09	1.7	0.01	1.1	0.6	0.02
Q$1645	Q8C266	Q8C266_MOUSE	Rab5c	Ras-related protein Rab-5C	1	16.67	3	2521273	2386741	2333985	2585343	161395	148695	148716	175004	14.3	13.9	14.2	15.1	-1.1	0.9	-1.1	0.9	1	1	-1	1	1.1	0.9	1.1	0.9	0.7
Q$758	O08756	HCD2_MOUSE	Hsd17b10	3-hydroxyacyl-CoA dehydrogenase type-2	1	27.59	5	2516767	2063055	2767099	2889039	294297	284725	272510	242882	26.1	30.9	22	18.8	-1.2	0.8	1.1	0.8	1.1	0.8	1.3	0.4	1.4	0.3	1	0.8	0.2
Q$119	Q64518-2	AT2A3_MOUSE	Atp2a	Isoform SERCA3A of Sarcoplasmic/endoplasmic reticulum calcium ATPase 3	1	17.52	12	2514714	2017824	2437679	2851000	265526	179711	170410	168636	23.6	19.9	15.6	13.2	-1.2	0.5	-1	0.8	1.1	0.5	1.2	0.5	1.4	0.06	1.2	0.5	0.07
Q$1978	Q9DCB8	ISCA2_MOUSE	Isca2	Iron-sulfur cluster assembly 2 homolog, mitochondrial	0.999	15.58	2	2499575	2100869	3042277	2907408	244415	263428	226147	148528	21.9	28	16.6	11.4	-1.2	0.5	1.2	0.5	1.2	0.5	1.4	0.1	1.4	0.1	-1	0.6	0.04
Q$169	D3YUK4	D3YUK4_MOUSE	Ndufb10	NADH dehydrogenase [ubiquinone] 1 beta subcomplex subunit 10 (Fragment)	1	9.4	1	2497035	2267550	2176355	2585230	268846	211569	259016	280301	24.1	20.9	26.6	24.2	-1.1	0.9	-1.1	0.9	1	1	-1	1	1.1	0.9	1.2	0.9	0.7
Q$1795	Q99KK7	DPP3_MOUSE	Dpp3	Dipeptidyl peptidase 3	0.9999	9.08	3	2490177	1982680	2826130	3331146	257672	135671	166380	104572	23.1	15.3	13.2	7	-1.3	0.2	1.1	0.3	1.3	0.06	1.4	0.02	1.7	0.0003	1.2	0.1	0.0005
Q$1329	Q07417	ACADS_MOUSE	Acads	Short-chain specific acyl-CoA dehydrogenase, mitochondrial	1	25.24	7	2488040	2066393	2584548	2720408	341169	157112	143123	84153	30.7	17	12.4	6.9	-1.2	0.8	1	0.8	1.1	0.8	1.3	0.2	1.3	0.04	1.1	0.8	0.2
Q$478	E9PZ69	E9PZ69_MOUSE	Tm9sf2	Transmembrane 9 superfamily member 2	0.9554	6.64	1	2467480	2543285	2774490	2999695	239245	368226	525130	308989	21.7	32.4	42.3	23	1	1	1.1	1	1.2	0.8	1.1	1	1.2	0.9	1.1	1	0.7
Q$1682	Q8K297	GT251_MOUSE	Colgalt1	Procollagen galactosyltransferase 1	0.9925	3.08	2	2459862	2012664	2706606	2756859	298323	102442	181541	276149	27.1	11.4	15	22.4	-1.2	0.6	1.1	0.9	1.1	0.9	1.3	0.06	1.4	0.2	1	0.9	0.1
Q$50	A2AL50	A2AL50_MOUSE	Agps	Alkyldihydroxyacetonephosphate synthase, peroxisomal	1	14.61	6	2459735	1819496	3194354	4317393	312534	169302	217259	204016	28.4	20.8	15.2	10.6	-1.4	0.2	1.3	0.2	1.8	0.005	1.8	0.005	2.4	8e-05	1.4	0.02	8e-06
Q$1571	Q80UR4	Q80UR4_MOUSE	Prss34	Mast cell protease-11	0.9999	8.49	2	2453941	1855727	2901224	3384873	250117	278148	547391	891361	22.8	33.5	42.2	58.9	-1.3	0.6	1.2	0.7	1.4	0.7	1.6	0.6	1.8	0.6	1.2	0.7	0.3
Q$1352	Q3TMX5	Q3TMX5_MOUSE	Manf	Arginine-rich, mutated in early stage tumors, isoform CRA_b	1	32.4	6	2443600	1381230	2350960	2903004	760127	300733	439646	657659	69.6	48.7	41.8	50.7	-1.8	0.6	-1	0.9	1.2	0.9	1.7	0.4	2.1	0.3	1.2	0.9	0.3
Q$444	E0CZ90	E0CZ90_MOUSE	Psme2	Proteasome activator complex subunit 2 (Fragment)	0.9999	32.73	4	2443380	1862992	2916244	2883162	254513	72394	273794	208635	23.3	8.7	21	16.2	-1.3	0.3	1.2	0.5	1.2	0.5	1.6	0.08	1.5	0.01	-1	0.9	0.01
Q$701	H3BJB6	H3BJB6_MOUSE	Cct8	T-complex protein 1 subunit theta (Fragment)	1	15.48	3	2431263	2304248	2650640	3495828	331984	352990	365292	440898	30.5	34.3	30.8	28.2	-1.1	0.9	1.1	0.9	1.4	0.4	1.2	0.9	1.5	0.3	1.3	0.5	0.1
Q$1293	P97426	ECP1_MOUSE	Ear1	Eosinophil cationic protein 1	1	30.32	3	2427653	1887311	2914950	3473187	385055	259441	255699	307851	35.5	30.7	19.6	19.8	-1.3	0.5	1.2	0.5	1.4	0.2	1.5	0.1	1.8	0.03	1.2	0.5	0.01
Q$108	B1AQ77	B1AQ77_MOUSE	Krt15	Keratin 15, isoform CRA_a	1	1.97	2	2421527	2037434	2694453	2572484	710943	701865	948223	432372	65.6	77	78.7	37.6	-1.2	1	1.1	1	1.1	1	1.3	1	1.3	1	-1	1	0.9
Q$1947	Q9D819	IPYR_MOUSE	Ppa1	Inorganic pyrophosphatase	1	13.15	4	2419393	1776852	2628847	3411439	438166	230181	235883	215747	40.5	29	20.1	14.1	-1.4	0.4	1.1	0.7	1.4	0.2	1.5	0.2	1.9	0.005	1.3	0.2	0.01
Q$1691	Q8QZS1	HIBCH_MOUSE	Hibch	3-hydroxyisobutyryl-CoA hydrolase, mitochondrial	0.9997	8.57	2	2416060	1899422	3047683	3062543	385196	215228	606435	364401	35.6	25.3	44.5	26.6	-1.3	0.7	1.3	0.7	1.3	0.7	1.6	0.4	1.6	0.1	1	1	0.2
Q$1437	Q61074	PPM1G_MOUSE	Ppm1g	Protein phosphatase 1G	1	4.8	2	2411141	1817208	2672342	3457992	411305	158558	270101	324175	38.1	19.5	22.6	21	-1.3	0.4	1.1	0.6	1.4	0.3	1.5	0.1	1.9	0.01	1.3	0.3	0.01
Q$1489	Q62433	NDRG1_MOUSE	Ndrg1	Protein NDRG1	1	25.89	5	2410744	1924872	2310722	3116934	315318	126079	182642	300493	29.2	14.6	17.7	21.6	-1.3	0.4	-1	0.8	1.3	0.4	1.2	0.4	1.6	0.04	1.3	0.2	0.02
Q$1416	Q60631	GRB2_MOUSE	Grb2	Growth factor receptor-bound protein 2	0.9997	33.18	4	2404434	1599361	2311107	3170638	433652	147591	221009	169015	40.3	20.6	21.4	11.9	-1.5	0.3	-1	0.9	1.3	0.3	1.4	0.1	2	0.0007	1.4	0.07	0.007
Q$1434	Q61033-2	LAP2A_MOUSE	Tmp	Isoform Zeta of Lamina-associated polypeptide 2, isoforms alpha/zeta	1	47.11	7	2404259	1620661	2713221	3512257	505387	206654	259009	196435	47	28.5	21.3	12.5	-1.5	0.3	1.1	0.6	1.5	0.2	1.7	0.05	2.2	0.001	1.3	0.1	0.006
Q$1502	Q64337-2	SQSTM_MOUSE	Sqstm	Isoform 2 of Sequestosome-1	1	10.4	3	2398404	1733009	3139346	3648951	485524	252335	488359	391227	45.3	32.6	34.8	24	-1.4	0.6	1.3	0.6	1.5	0.3	1.8	0.2	2.1	0.02	1.2	0.6	0.02
Q$523	E9Q5B6	E9Q5B6_MOUSE	Hnrnpd	Heterogeneous nuclear ribonucleoprotein D0 (Fragment)	1	57.01	5	2396478	1904285	2631523	7351067	409418	184791	168381	3769646	38.2	21.7	14.3	114.7	-1.3	0.7	1.1	0.7	3.1	0.7	1.4	0.1	3.9	0.7	2.8	0.7	0.2
Q$665	P62858	RS28_MOUSE	Rps28	40S ribosomal protein S28	1	28.99	2	2389722	1948811	3271688	3929029	428762	274513	352837	234519	40.1	31.5	24.1	13.3	-1.2	0.4	1.4	0.4	1.6	0.07	1.7	0.07	2	0.004	1.2	0.4	0.003
Q$1742	Q91WK2	EIF3H_MOUSE	Eif3h	Eukaryotic translation initiation factor 3 subunit H	0.997	9.94	2	2387525	2268783	2223370	2134105	171466	196019	170318	161568	16.1	19.3	17.1	16.9	-1.1	1	-1.1	1	-1.1	0.9	-1	1	-1.1	1	-1	1	0.8
Q$173	S4R223	S4R223_MOUSE	Rps19	40S ribosomal protein S19	1	44.44	4	2387236	1792730	3169922	5753500	413722	254870	291936	1691177	38.8	31.8	20.6	65.7	-1.3	0.4	1.3	0.4	2.4	0.4	1.8	0.04	3.2	0.3	1.8	0.4	0.03
Q$1202	Q5SW88	Q5SW88_MOUSE	Rab1	Ras-related protein Rab-1A	1	40.1	5	2350606	1892220	2392918	2628127	243274	146454	143299	176108	23.1	17.3	13.4	15	-1.2	0.5	1	0.9	1.1	0.7	1.3	0.2	1.4	0.07	1.1	0.7	0.07
Q$178	Q64213-3	SF01_MOUSE	Sf	Isoform 3 of Splicing factor 1	1	12.21	5	2348073	1717280	2855789	3003318	386125	220104	377664	281016	36.8	28.7	29.6	20.9	-1.4	0.6	1.2	0.6	1.3	0.6	1.7	0.1	1.7	0.04	1.1	0.8	0.05
Q$620	F7CAZ6	F7CAZ6_MOUSE	Capzb	F-actin-capping protein subunit beta (Fragment)	1	35.29	5	2339551	1659447	2489907	2961181	447981	196514	194874	136096	42.8	26.5	17.5	10.3	-1.4	0.5	1.1	0.8	1.3	0.5	1.5	0.08	1.8	0.004	1.2	0.3	0.03
Q$2013	Q9JHU9	INO1_MOUSE	Isyna1	Inositol-3-phosphate synthase 1	1	4.13	2	2334738	1582885	2406293	3297876	464036	262916	426509	552224	44.4	37.1	39.6	37.4	-1.5	0.6	1	0.9	1.4	0.6	1.5	0.5	2.1	0.1	1.4	0.6	0.09
Q$1720	Q8VDM6-2	HNRL1_MOUSE	Hnrnpul	Isoform 2 of Heterogeneous nuclear ribonucleoprotein U-like protein 1	0.9999	9.49	4	2321324	1699785	2652801	3189493	362114	202589	178142	213075	34.9	26.7	15	14.9	-1.4	0.3	1.1	0.4	1.4	0.3	1.6	0.04	1.9	0.006	1.2	0.3	0.005
Q$65	Q8C570	RAE1L_MOUSE	Rae1	mRNA export factor	1	14.13	3	2315556	1714608	2435679	3171335	203292	175490	148546	329400	19.6	22.9	13.6	23.2	-1.4	0.2	1.1	0.6	1.4	0.2	1.4	0.07	1.8	0.03	1.3	0.2	0.003
Q$1813	Q99M28	RNPS1_MOUSE	Rnps1	RNA-binding protein with serine-rich domain 1	1	16.07	3	2312931	1705306	2398315	3315968	366020	190592	228192	355802	35.4	25	21.3	24	-1.4	0.3	1	0.8	1.4	0.2	1.4	0.2	1.9	0.02	1.4	0.2	0.01
Q$1512	Q64737	PUR2_MOUSE	Gart	Trifunctional purine biosynthetic protein adenosine-3	1	5.45	3	2311815	1678679	2266904	3374845	324155	188971	180666	486982	31.4	25.2	17.8	32.3	-1.4	0.3	-1	0.9	1.5	0.3	1.4	0.2	2	0.07	1.5	0.2	0.01
Q$51	A2AL85	A2AL85_MOUSE	Asph	Aspartyl/asparaginyl beta-hydroxylase	1	15.03	5	2306909	1852696	2667073	3402098	498382	214797	306342	456017	48.3	25.9	25.7	30	-1.2	0.7	1.2	0.7	1.5	0.5	1.4	0.3	1.8	0.09	1.3	0.5	0.07
Q$2000	Q9ERL7	GMFG_MOUSE	Gmfg	Glia maturation factor gamma	1	32.39	3	2301425	1977620	2405734	3003622	301551	208698	228811	273013	29.3	23.6	21.3	20.3	-1.2	0.6	1	0.8	1.3	0.5	1.2	0.5	1.5	0.1	1.2	0.5	0.07
Q$1476	Q62095	DDX3Y_MOUSE	Ddx3y	ATP-dependent RNA helicase DDX3Y	1	13.83	7	2300237	1787994	2836202	3314811	291227	152937	236159	107232	28.3	19.1	18.6	7.2	-1.3	0.3	1.2	0.3	1.4	0.04	1.6	0.03	1.9	0.0002	1.2	0.3	0.0006
Q$771	O09172	GSH0_MOUSE	Gclm	Glutamate--cysteine ligase regulatory subunit	1	16.06	3	2269016	1856014	2042127	2411153	196568	102627	107306	197552	19.4	12.4	11.7	18.3	-1.2	0.4	-1.1	0.6	1.1	0.6	1.1	0.6	1.3	0.2	1.2	0.5	0.1
Q$1144	P57787	MOT4_MOUSE	Slc16a3	Monocarboxylate transporter 4	0.9999	2.77	2	2258403	1705705	2408956	2220097	317414	182780	202215	224227	31.4	24	18.8	22.6	-1.3	0.5	1.1	0.9	-1	0.9	1.4	0.2	1.3	0.5	-1.1	0.9	0.2
Q$529	E9Q6H6	E9Q6H6_MOUSE	Alox5	Arachidonate 5-lipoxygenase	1	6.07	4	2255042	1895398	1967001	2320444	322375	176756	185906	236426	32	20.9	21.1	22.8	-1.2	0.8	-1.1	0.8	1	1	1	1	1.2	0.7	1.2	0.8	0.5
Q$925	P14685	PSMD3_MOUSE	Psmd3	26S proteasome non-ATPase regulatory subunit 3	1	13.02	5	2243808	1955811	2271394	2841030	263645	102606	214776	264520	26.3	11.7	21.1	20.8	-1.1	0.6	1	0.9	1.3	0.5	1.2	0.5	1.5	0.08	1.3	0.5	0.07
Q$1957	Q9D8V7	SC11C_MOUSE	Sec11c	Signal peptidase complex catalytic subunit SEC11C	0.9965	16.67	2	2239039	2364889	2541445	2915925	231988	191519	175207	370021	23.2	18.1	15.4	28.4	1.1	0.8	1.1	0.8	1.3	0.6	1.1	0.8	1.2	0.7	1.1	0.8	0.3
Q$231	D3Z0Y2	D3Z0Y2_MOUSE	Prdx6	Peroxiredoxin-6	1	24.5	3	2237257	1498633	2482279	3086074	331840	142286	159354	163157	33.2	21.2	14.4	11.8	-1.5	0.1	1.1	0.5	1.4	0.1	1.7	0.009	2.1	0.0005	1.2	0.1	0.0008
Q$446	E9PUM4	E9PUM4_MOUSE	Tln2	Talin-2	1	1.61	4	2236475	1484550	1983297	3030965	432999	383663	170919	385297	43.3	57.8	19.3	28.4	-1.5	0.6	-1.1	0.6	1.4	0.6	1.3	0.6	2	0.1	1.5	0.2	0.05
Q$2086	Q9WVE8	PACN2_MOUSE	Pacsin2	Protein kinase C and casein kinase substrate in neurons protein 2	0.972	2.26	1	2236150	1831172	2300230	3767410	297423	186904	75349	469955	29.7	22.8	7.3	27.9	-1.2	0.5	1	0.8	1.7	0.1	1.3	0.1	2.1	0.03	1.6	0.1	0.002
Q$740	J3QNN8	J3QNN8_MOUSE	Gm10263	MCG49140	1	13.04	1	2232467	1811997	2866253	3619147	410178	245276	302584	243778	41.1	30.3	23.6	15.1	-1.2	0.4	1.3	0.4	1.6	0.09	1.6	0.1	2	0.005	1.3	0.2	0.004
Q$636	F8WJG3	F8WJG3_MOUSE	Tra2b	Transformer-2 protein homolog beta	1	19.68	2	2217793	2201883	2145697	2221099	46658	51257	100230	125163	4.7	5.2	10.4	12.6	-1	1	-1	1	1	1	-1	1	1	1	1	1	0.9
Q$192	D3YX62	D3YX62_MOUSE	Hmox2	Heme oxygenase 2 (Fragment)	1	23.25	4	2216658	2174555	2391803	2618398	252257	193556	291446	300337	25.4	19.9	27.2	25.6	-1	1	1.1	1	1.2	0.9	1.1	1	1.2	0.8	1.1	1	0.6
Q$1640	Q8BXZ1	TMX3_MOUSE	Tmx3	Protein disulfide-isomerase TMX3	0.9999	6.58	2	2216181	2044822	2137417	2605676	112451	76486	140888	271932	11.3	8.4	14.7	23.3	-1.1	0.6	-1	0.8	1.2	0.6	1	0.8	1.3	0.5	1.2	0.6	0.1
Q$2073	Q9WUA3-2	K6PP_MOUSE	Pfk	Isoform 2 of 6-phosphofructokinase type C	1	19.76	4	2211635	1584479	2591562	2838326	435974	142310	257036	224225	44.1	20.1	22.2	17.7	-1.4	0.6	1.2	0.7	1.3	0.6	1.6	0.04	1.8	0.009	1.1	0.7	0.04
Q$1465	Q61792	LASP1_MOUSE	Lasp1	LIM and SH3 domain protein 1	0.9999	15.97	3	2210591	1557002	2490528	2755251	283881	128520	508567	534358	28.7	18.5	45.7	43.4	-1.4	0.3	1.1	0.9	1.2	0.8	1.6	0.5	1.8	0.4	1.1	0.9	0.2
Q$1211	P62874	GBB1_MOUSE	Gnb1	Guanine nucleotide-binding protein G(I)/G(S)/G(T) subunit beta-1	1	32.35	8	2203170	1822319	2451689	3189891	303388	142950	96702	428468	30.8	17.5	8.8	30	-1.2	0.5	1.1	0.5	1.4	0.3	1.3	0.04	1.8	0.08	1.3	0.4	0.02
Q$1122	P53395	ODB2_MOUSE	Dbt	Lipoamide acyltransferase component of branched-chain alpha-keto acid dehydrogenase complex, mitochondrial	0.9849	1.87	1	2201456	1235795	1056873	1002136	987322	102198	73948	114004	100.3	18.5	15.6	25.4	-1.8	0.7	-2.1	0.7	-2.2	0.7	-1.2	0.7	-1.2	0.7	-1.1	0.7	0.3
Q$1773	Q923D4	SF3B5_MOUSE	Sf3b5	Splicing factor 3B subunit 5	1	45.35	2	2194553	1769601	2257924	2806711	88165	156812	74326	233874	9	19.8	7.4	18.6	-1.2	0.2	1	0.6	1.3	0.2	1.3	0.1	1.6	0.04	1.2	0.2	0.002
Q$1466	Q61820	RANT_MOUSE	Rasl2-9	GTP-binding nuclear protein Ran, testis-specific isoform	1	5.09	1	2191727	1646260	2188610	3234723	415890	179414	237834	281993	42.4	24.4	24.3	19.5	-1.3	0.5	-1	1	1.5	0.3	1.3	0.3	2	0.009	1.5	0.1	0.01
Q$21	A2AAW9	A2AAW9_MOUSE	Eif2s3x	Eukaryotic translation initiation factor 2 subunit 3, X-linked	1	12.79	3	2190495	1423673	2517833	3165049	371358	149514	273266	250718	37.9	23.5	24.3	17.7	-1.5	0.3	1.1	0.5	1.4	0.2	1.8	0.04	2.2	0.002	1.3	0.3	0.003
Q$1344	Q3TEA8-2	HP1B3_MOUSE	Hp1bp	Isoform 2 of Heterochromatin protein 1-binding protein 3	1	12.94	5	2182763	1684313	2507775	2395733	244977	257039	99165	24253	25.1	34.1	8.8	2.3	-1.3	0.6	1.1	0.6	1.1	0.6	1.5	0.1	1.4	0.2	-1	0.6	0.03
Q$2096	Q9Z1G3	VATC1_MOUSE	Atp6v1c1	V-type proton ATPase subunit C 1	0.9995	11.26	2	2180498	1303256	3020069	4096499	520632	186096	421590	653772	53.4	31.9	31.2	35.7	-1.7	0.4	1.4	0.4	1.9	0.2	2.3	0.03	3.1	0.05	1.4	0.4	0.005
Q$1622	Q8BMJ2	SYLC_MOUSE	Lars	Leucine--tRNA ligase, cytoplasmic	0.9983	6.62	4	2162514	1477102	2323733	4291109	405702	184412	209045	1055798	42	27.9	20.1	55	-1.5	0.4	1.1	0.7	2	0.3	1.6	0.09	2.9	0.2	1.8	0.4	0.02
Q$1287	P97352	S10AD_MOUSE	S100a13	Protein S100-A13	0.9797	11.22	1	2154620	1399400	2592450	2938760	363209	142263	143859	223643	37.7	22.7	12.4	17	-1.5	0.3	1.2	0.4	1.4	0.3	1.9	0.002	2.1	0.002	1.1	0.4	0.002
Q$1169	P61804	DAD1_MOUSE	Dad1	Dolichyl-diphosphooligosaccharide--protein glycosyltransferase subunit DAD1	0.9879	10.62	1	2150066	921536	938666	1355338	1113503	185919	261556	335776	115.8	45.1	62.3	55.4	-2.3	0.9	-2.3	0.9	-1.6	0.9	1	1	1.5	0.9	1.4	0.9	0.5
Q$225	D3Z0B9	D3Z0B9_MOUSE	Aldh16a1	Aldehyde dehydrogenase family 16 member A1	0.9779	2.52	1	2143825	2138865	2252935	2222695	250114	240555	208887	195436	26.1	25.1	20.7	19.7	-1	1	1.1	1	1	1	1.1	1	1	1	-1	1	1
Q$259	D3Z4X1	D3Z4X1_MOUSE	Pgls	6-phosphogluconolactonase	1	34.48	2	2143337	1930960	2361037	2884890	289408	269371	197466	238950	30.2	31.2	18.7	18.5	-1.1	0.8	1.1	0.8	1.3	0.4	1.2	0.6	1.5	0.2	1.2	0.4	0.08
Q$26	Q9CQY5-2	MAGT1_MOUSE	Magt	Isoform 2 of Magnesium transporter protein 1	0.9997	6.54	2	2132515	2097973	2396645	2755914	207053	122105	218546	170235	21.7	13	20.4	13.8	-1	0.9	1.1	0.6	1.3	0.2	1.1	0.6	1.3	0.08	1.1	0.6	0.08
Q$697	Q9DBG3-2	AP2B1_MOUSE	Ap2b	Isoform 2 of AP-2 complex subunit beta	1	3.68	3	2131654	1750898	2312702	2490410	308355	260120	233866	178302	32.3	33.2	22.6	16	-1.2	0.8	1.1	0.8	1.2	0.8	1.3	0.5	1.4	0.3	1.1	0.8	0.2
Q$210	D3YYI8	D3YYI8_MOUSE	Gm10093	Histone deacetylase	1	8.51	3	2125643	1553050	2530986	3489880	391258	201288	250208	536581	41.2	29	22.1	34.4	-1.4	0.4	1.2	0.4	1.6	0.3	1.6	0.08	2.2	0.06	1.4	0.4	0.01
Q$1844	Q9CQ75	NDUA2_MOUSE	Ndufa2	NADH dehydrogenase [ubiquinone] 1 alpha subcomplex subunit 2	1	24.24	2	2118588	1908978	2256477	2560169	468809	529716	484805	383223	49.5	62	48	33.5	-1.1	1	1.1	1	1.2	1	1.2	1	1.3	0.9	1.1	1	0.8
Q$217	D3YZS3	D3YZS3_MOUSE	Ube2l3	Ubiquitin-conjugating enzyme E2 L3	1	44.54	4	2115704	1391814	2412885	3036090	345524	173433	157892	126449	36.5	27.9	14.6	9.3	-1.5	0.2	1.1	0.5	1.4	0.1	1.7	0.01	2.2	0.0004	1.3	0.06	0.0007
Q$1171	P61971	NTF2_MOUSE	Nutf2	Nuclear transport factor 2	0.9998	23.62	2	2104453	1526387	2199612	3099570	340258	233801	267935	306979	36.2	34.3	27.2	22.1	-1.4	0.4	1	0.8	1.5	0.3	1.4	0.3	2	0.02	1.4	0.3	0.01
Q$637	F8WJK8	F8WJK8_MOUSE	St13	Hsc70-interacting protein	1	10.22	3	2103336	1728179	2271517	3385791	330868	91423	208580	264484	35.2	11.8	20.5	17.5	-1.2	0.5	1.1	0.7	1.6	0.06	1.3	0.1	2	0.002	1.5	0.05	0.001
Q$1048	P35762	CD81_MOUSE	Cd81	CD81 antigen	0.995	18.22	2	2087586	1514649	2404076	7339165	263481	154797	139241	4526889	28.2	22.9	13	137.9	-1.4	0.4	1.2	0.7	3.5	0.7	1.6	0.02	4.8	0.7	3.1	0.7	0.3
Q$1062	P41105	RL28_MOUSE	Rpl28	60S ribosomal protein L28	0.9986	14.6	2	2086600	2153350	2177763	2777211	272700	346658	205963	444552	29.2	36	21.1	35.8	1	1	1	1	1.3	0.8	1	1	1.3	0.8	1.3	0.8	0.4
Q$1628	Q8BSL7	ARF2_MOUSE	Arf2	ADP-ribosylation factor 2	1	12.15	2	2084258	1535399	2267854	3197127	536270	227964	239269	356480	57.5	33.2	23.6	24.9	-1.4	0.6	1.1	0.8	1.5	0.3	1.5	0.3	2.1	0.03	1.4	0.3	0.04
Q$1876	Q9CW03	SMC3_MOUSE	Smc3	Structural maintenance of chromosomes protein 3	0.9984	3.37	3	2076960	1773816	1862779	5538804	301175	172873	208102	1994033	32.4	21.8	25	80.5	-1.2	0.8	-1.1	0.8	2.7	0.6	1.1	0.8	3.1	0.6	3	0.6	0.05
Q$1751	Q91YR7-2	PRP6_MOUSE	Prpf	Isoform 2 of Pre-mRNA-processing factor 6	1	6.84	3	2072004	1976125	2095625	3809424	296373	299840	222180	1626168	32	33.9	23.7	95.5	-1	1	1	1	1.8	0.9	1.1	1	1.9	0.9	1.8	0.9	0.4
Q$2090	Q9Z0N2	IF2H_MOUSE	Eif2s3y	Eukaryotic translation initiation factor 2 subunit 3, Y-linked	1	18.64	5	2061583	1515387	2296436	2679308	298483	119702	234567	175126	32.4	17.7	22.8	14.6	-1.4	0.4	1.1	0.6	1.3	0.4	1.5	0.09	1.8	0.003	1.2	0.4	0.01
Q$1779	Q99JI4	PSMD6_MOUSE	Psmd6	26S proteasome non-ATPase regulatory subunit 6	0.9994	7.97	2	2058136	1859378	2563545	3689405	549894	485547	628177	1013654	59.7	58.4	54.8	61.4	-1.1	0.8	1.2	0.8	1.8	0.7	1.4	0.8	2	0.6	1.4	0.8	0.3
Q$1852	Q9CQM5	TXD17_MOUSE	Txndc17	Thioredoxin domain-containing protein 17	0.9998	18.7	2	2053901	1393211	2278466	2948399	341212	165507	134976	150055	37.1	26.6	13.2	11.4	-1.5	0.2	1.1	0.6	1.4	0.1	1.6	0.02	2.1	0.0007	1.3	0.04	0.001
Q$2008	Q9ET30	TM9S3_MOUSE	Tm9sf3	Transmembrane 9 superfamily member 3	0.9996	6.3	2	2051944	1788278	2453835	2498237	204047	272921	175762	246291	22.2	34.1	16	22	-1.1	0.7	1.2	0.5	1.2	0.5	1.4	0.4	1.4	0.4	1	0.9	0.1
Q$1375	Q3UGC7	EI3JA_MOUSE	Eif3j1	Eukaryotic translation initiation factor 3 subunit J-A	1	9.58	3	2049854	1561456	2266467	3129918	338361	202450	176354	375204	36.9	29	17.4	26.8	-1.3	0.4	1.1	0.6	1.5	0.2	1.5	0.1	2	0.04	1.4	0.2	0.01
Q$1543	Q6WVG3	KCD12_MOUSE	Kctd12	BTB/POZ domain-containing protein KCTD12	0.9985	7.34	2	2042082	1679438	4172888	3542084	211368	230415	689432	527725	23.1	30.7	36.9	33.3	-1.2	0.5	2	0.1	1.7	0.1	2.5	0.05	2.1	0.06	-1.2	0.5	0.004
Q$1495	Q63850	NUP62_MOUSE	Nup62	Nuclear pore glycoprotein p62	0.9913	8.56	2	2039218	1701738	2545347	3053910	265884	251153	287956	240022	29.2	33	25.3	17.6	-1.2	0.5	1.2	0.5	1.5	0.1	1.5	0.2	1.8	0.03	1.2	0.5	0.01
Q$548	E9QAS4	E9QAS4_MOUSE	Chd4	Chromodomain-helicase-DNA-binding protein 4	1	4.47	5	2039025	1188882	2543648	2938112	429555	219344	323860	269176	47.1	41.3	28.5	20.5	-1.7	0.4	1.2	0.6	1.4	0.4	2.1	0.04	2.5	0.006	1.2	0.6	0.008
Q$1515	Q69ZN7-4	MYOF_MOUSE	Myo	Isoform 4 of Myoferlin	1	4.33	6	2035912	1408083	1846996	2267220	557333	239321	243839	188751	61.2	38	29.5	18.6	-1.4	0.7	-1.1	0.9	1.1	0.9	1.3	0.7	1.6	0.1	1.2	0.7	0.4
Q$2076	Q9WUM4	COR1C_MOUSE	Coro1c	Coronin-1C	1	13.71	3	2035619	1537881	2774984	3029526	368757	266310	252166	491837	40.5	38.7	20.3	36.3	-1.3	0.5	1.4	0.4	1.5	0.4	1.8	0.06	2	0.1	1.1	0.7	0.04
Q$1168	P61620	S61A1_MOUSE	Sec61a1	Protein transport protein Sec61 subunit alpha isoform 1	1	7.98	2	2022210	1837400	1621220	1952720	188354	228207	45675	173468	20.8	27.8	6.3	19.9	-1.1	0.9	-1.2	0.5	-1	0.9	-1.1	0.9	1.1	0.9	1.2	0.5	0.4
Q$1798	Q99KQ4	NAMPT_MOUSE	Nampt	Nicotinamide phosphoribosyltransferase	0.9991	8.35	2	2022046	1453672	2665273	3158453	347333	194741	97674	237360	38.4	30	8.2	16.8	-1.4	0.3	1.3	0.3	1.6	0.1	1.8	0.003	2.2	0.003	1.2	0.2	0.0006
Q$819	O88544	CSN4_MOUSE	Cops4	COP9 signalosome complex subunit 4	0.9949	8.37	3	2021801	1276262	2046709	2445234	445530	204937	399246	342948	49.3	35.9	43.6	31.4	-1.6	0.5	1	1	1.2	0.9	1.6	0.5	1.9	0.1	1.2	0.9	0.2
Q$1574	Q80WS3	FBLL1_MOUSE	Fbll1	rRNA/tRNA 2'-O-methyltransferase fibrillarin-like protein 1	1	3.5	1	2014610	1452275	2379605	3331015	443739	214621	199552	221691	49.3	33	18.8	14.9	-1.4	0.5	1.2	0.5	1.7	0.08	1.6	0.06	2.3	0.002	1.4	0.06	0.002
Q$188	P62751	RL23A_MOUSE	Rpl23a	60S ribosomal protein L23a	1	24.36	4	2012144	1852904	2482950	2970277	289091	354572	486699	323727	32.1	42.8	43.8	24.4	-1.1	0.8	1.2	0.8	1.5	0.3	1.3	0.8	1.6	0.3	1.2	0.8	0.2
Q$948	P17439	GLCM_MOUSE	Gba	Glucosylceramidase	0.9969	10.1	2	2010543	1656871	2942525	2785496	201757	229322	181298	200611	22.4	30.9	13.8	16.1	-1.2	0.5	1.5	0.04	1.4	0.08	1.8	0.01	1.7	0.03	-1.1	0.6	0.0009
Q$1868	Q9CR62	M2OM_MOUSE	Slc25a11	Mitochondrial 2-oxoglutarate/malate carrier protein	1	13.06	3	2006948	1516109	2044972	2503635	200218	92259	121449	225011	22.3	13.6	13.3	20.1	-1.3	0.2	1	0.9	1.2	0.3	1.3	0.04	1.7	0.02	1.2	0.3	0.007
Q$1274	P83882	RL36A_MOUSE	Rpl36a	60S ribosomal protein L36a	0.9688	8.49	1	1995330	1387480	2468140	7002750	281734	153774	186935	4156710	31.6	24.8	16.9	132.7	-1.4	0.4	1.2	0.6	3.5	0.6	1.8	0.01	5	0.6	2.8	0.6	0.2
Q$1830	Q9CPQ3	TOM22_MOUSE	Tomm22	Mitochondrial import receptor subunit TOM22 homolog	1	25.35	2	1993718	1757984	1988287	2361699	211059	114656	157711	314725	23.7	14.6	17.7	29.8	-1.1	0.8	-1	1	1.2	0.8	1.1	0.8	1.3	0.5	1.2	0.8	0.3
Q$1147	P59017	B2L13_MOUSE	Bcl2l13	Bcl-2-like protein 13	0.9993	8.99	2	1992391	1746364	2424698	2933066	401055	250505	240890	275897	45	32.1	22.2	21	-1.1	0.6	1.2	0.6	1.5	0.4	1.4	0.4	1.7	0.08	1.2	0.5	0.06
Q$881	P09065	HME1_MOUSE	En1	Homeobox protein engrailed-1	0.9891	15.96	1	1990348	1665280	2190280	2384680	238847	265490	207923	82400	26.8	35.6	21.2	7.7	-1.2	0.8	1.1	0.8	1.2	0.6	1.3	0.6	1.4	0.3	1.1	0.8	0.1
Q$1436	Q61036-2	PAK3_MOUSE	Pak	Isoform 2 of Serine/threonine-protein kinase PAK 3	1	6.99	2	1987136	1629742	2678308	2392822	256722	163702	318849	290885	28.9	22.5	26.6	27.2	-1.2	0.6	1.3	0.4	1.2	0.6	1.6	0.1	1.5	0.2	-1.1	0.6	0.06
Q$2110	Q9Z2U1	PSA5_MOUSE	Psma5	Proteasome subunit alpha type-5	1	21.16	2	1984354	1381304	2360676	2919963	307343	160392	230987	211287	34.6	26	21.9	16.2	-1.4	0.3	1.2	0.4	1.5	0.1	1.7	0.04	2.1	0.002	1.2	0.3	0.002
Q$1510	Q64674	SPEE_MOUSE	Srm	Spermidine synthase	0.9998	12.25	2	1982588	1450903	1769591	2296152	260374	105003	191872	170628	29.4	16.2	24.2	16.6	-1.4	0.3	-1.1	0.6	1.2	0.6	1.2	0.5	1.6	0.02	1.3	0.3	0.04
Q$2120	S4R281	S4R281_MOUSE	Rpl13a	60S ribosomal protein L13a	1	15.54	2	1977002	1665030	2196096	2997846	366405	192183	271654	278271	41.4	25.8	27.7	20.8	-1.2	0.7	1.1	0.7	1.5	0.3	1.3	0.4	1.8	0.03	1.4	0.3	0.03
Q$17	Q8VE97	SRSF4_MOUSE	Srsf4	Serine/arginine-rich splicing factor 4	1	1.84	1	1967100	1564323	2411297	3200883	323700	230962	287400	296177	36.8	33	26.7	20.7	-1.3	0.6	1.2	0.6	1.6	0.1	1.5	0.2	2	0.01	1.3	0.3	0.006
Q$196	D3YXG6	D3YXG6_MOUSE	Arpc2	Actin-related protein 2/3 complex subunit 2	1	22.18	5	1966269	1427452	2351970	2680088	313711	139002	195549	227030	35.7	21.8	18.6	18.9	-1.4	0.4	1.2	0.5	1.4	0.4	1.6	0.02	1.9	0.009	1.1	0.5	0.008
Q$71	Q64012-2	RALY_MOUSE	Ral	Isoform 1 of RNA-binding protein Raly	1	29.05	6	1964657	1269644	2526831	3151464	437221	230306	251828	246450	49.8	40.6	22.3	17.5	-1.5	0.4	1.3	0.4	1.6	0.2	2	0.03	2.5	0.003	1.2	0.3	0.003
Q$1143	P57784	RU2A_MOUSE	Snrpa1	U2 small nuclear ribonucleoprotein A'	1	30.98	5	1964416	1673655	2000620	2108197	238280	175700	103152	42134	27.1	23.5	11.5	4.5	-1.2	0.8	1	0.9	1.1	0.8	1.2	0.5	1.3	0.3	1.1	0.8	0.3
Q$885	P09528	FRIH_MOUSE	Fth1	Ferritin heavy chain	0.9422	6.04	1	1958130	1773663	2428500	3908150	361830	278740	252874	707331	41.3	35.1	23.3	40.5	-1.1	0.7	1.2	0.5	2	0.2	1.4	0.3	2.2	0.1	1.6	0.3	0.01
Q$117	B1ATJ5	B1ATJ5_MOUSE	Krt32	Keratin, type I cuticular Ha2	1	8.39	4	1957304	1781483	2475201	3064261	207878	224389	147912	232563	23.7	28.2	13.4	17	-1.1	0.6	1.3	0.2	1.6	0.04	1.4	0.1	1.7	0.02	1.2	0.2	0.002
Q$455	E9PVX6	E9PVX6_MOUSE	Mki67	Protein Mki67	1	0.66	2	1955909	1481284	2121220	4300390	678311	373481	428330	2072063	77.5	56.4	45.2	107.7	-1.3	0.8	1.1	0.8	2.2	0.8	1.4	0.8	2.9	0.8	2	0.8	0.3
Q$833	O89110	CASP8_MOUSE	Casp8	Caspase-8	0.9455	2.5	1	1954948	1670090	2217950	2799730	404119	271043	337892	478362	46.2	36.3	34.1	38.2	-1.2	0.8	1.1	0.8	1.4	0.7	1.3	0.7	1.7	0.4	1.3	0.7	0.2
Q$1867	Q9CR61	NDUB7_MOUSE	Ndufb7	NADH dehydrogenase [ubiquinone] 1 beta subcomplex subunit 7	1	32.12	3	1935450	1631389	1952244	2190887	205201	123875	140389	164306	23.7	17	16.1	16.8	-1.2	0.7	1	0.9	1.1	0.7	1.2	0.5	1.3	0.1	1.1	0.7	0.2
Q$1634	Q8BVE3	VATH_MOUSE	Atp6v1h	V-type proton ATPase subunit H	1	11.8	3	1932740	1720264	2171696	2399303	182361	164553	164041	201688	21.1	21.4	16.9	18.8	-1.1	0.7	1.1	0.7	1.2	0.4	1.3	0.4	1.4	0.2	1.1	0.7	0.08
Q$170	D3YUM1	D3YUM1_MOUSE	Ndufv1	NADH dehydrogenase [ubiquinone] flavoprotein 1, mitochondrial	0.9999	25.93	6	1929585	1270799	1916646	2518550	344099	87719	166831	158966	39.9	15.4	19.5	14.1	-1.5	0.3	-1	1	1.3	0.3	1.5	0.04	2	0.0008	1.3	0.1	0.007
Q$941	P17047-2	LAMP2_MOUSE	Lamp	Isoform LAMP-2B of Lysosome-associated membrane glycoprotein 2	1	7.93	3	1928462	1643520	1664249	1971873	377158	192370	194001	155079	43.7	26.2	26.1	17.6	-1.2	0.9	-1.2	0.9	1	1	1	1	1.2	0.8	1.2	0.8	0.7
Q$703	H3BJE0	H3BJE0_MOUSE	Grn	Granulins (Fragment)	1	5.26	1	1927927	1722770	2286563	2137453	381747	133663	165685	75397	44.3	17.3	16.2	7.9	-1.1	0.9	1.2	0.9	1.1	0.9	1.3	0.2	1.2	0.2	-1.1	0.9	0.3
Q$1509	Q64669	NQO1_MOUSE	Nqo1	NAD(P)H dehydrogenase [quinone] 1	0.9999	7.66	3	1923168	1704721	2416196	2918007	222428	144905	129695	159274	25.9	19	12	12.2	-1.1	0.4	1.3	0.2	1.5	0.03	1.4	0.03	1.7	0.003	1.2	0.1	0.0005
Q$831	O89079	COPE_MOUSE	Cope	Coatomer subunit epsilon	0.9999	17.53	3	1894412	1552150	1716777	2823730	412544	271626	365227	210587	48.7	39.1	47.6	16.7	-1.2	0.9	-1.1	0.9	1.5	0.3	1.1	0.9	1.8	0.04	1.6	0.1	0.06
Q$1890	Q9CY58-2	PAIRB_MOUSE	Serbp	Isoform 2 of Plasminogen activator inhibitor 1 RNA-binding protein	1	19.64	6	1892260	1525630	2013393	2315927	316459	134930	88611	137199	37.4	19.8	9.8	13.2	-1.2	0.6	1.1	0.7	1.2	0.6	1.3	0.08	1.5	0.02	1.2	0.3	0.06
Q$54	A2AM65	A2AM65_MOUSE	Hp1bp3	Heterochromatin protein 1-binding protein 3 (Fragment)	1	20.55	4	1891975	1402402	2156711	2044309	262310	231728	99558	27547	31	36.9	10.3	3	-1.3	0.6	1.1	0.7	1.1	0.7	1.5	0.1	1.5	0.2	-1.1	0.7	0.05
Q$132	B2RPU8	B2RPU8_MOUSE	2410018M08Rik	MCG130675	1	6.75	3	1891262	1249099	2001728	2538058	468832	166186	348775	253581	55.4	29.7	39	22.3	-1.5	0.7	1.1	0.9	1.3	0.7	1.6	0.4	2	0.02	1.3	0.7	0.09
Q$728	J3QK04	J3QK04_MOUSE	Gm7808	MCG67952	1	12.5	1	1885530	1600620	1831340	2174020	104851	129506	138837	246326	12.4	18.1	17	25.3	-1.2	0.5	-1	0.8	1.2	0.7	1.1	0.7	1.4	0.4	1.2	0.7	0.1
Q$1125	P53996-2	CNBP_MOUSE	Cnb	Isoform 2 of Cellular nucleic acid-binding protein	1	15.88	3	1876542	1244951	1905048	2144725	156497	81745	195459	127586	18.6	14.7	22.9	13.3	-1.5	0.04	1	0.9	1.1	0.5	1.5	0.06	1.7	0.002	1.1	0.6	0.003
Q$41	A2AGN7	A2AGN7_MOUSE	Psmc3	26S protease regulatory subunit 6A	1	28.25	7	1869633	1410325	2006721	2550213	269625	138685	149922	147904	32.2	22	16.7	13	-1.3	0.3	1.1	0.7	1.4	0.2	1.4	0.09	1.8	0.003	1.3	0.1	0.004
Q$1685	Q8K3J1	NDUS8_MOUSE	Ndufs8	NADH dehydrogenase [ubiquinone] iron-sulfur protein 8, mitochondrial	0.9998	15.09	2	1868658	2739002	1021962	17899854	513495	1851357	68565	12479483	61.4	151.1	15	155.9	1.5	0.8	-1.8	0.7	9.6	0.8	-2.7	0.8	6.5	0.8	17.5	0.8	0.2
Q$1919	Q9D172	ES1_MOUSE	D10Jhu81e	ES1 protein homolog, mitochondrial	0.9994	15.04	2	1866724	1642799	1719061	1998323	239517	142768	119671	112546	28.7	19.4	15.6	12.6	-1.1	0.9	-1.1	0.9	1.1	0.9	1	0.9	1.2	0.4	1.2	0.5	0.4
Q$1847	Q9CQC7	NDUB4_MOUSE	Ndufb4	NADH dehydrogenase [ubiquinone] 1 beta subcomplex subunit 4	0.9892	19.38	1	1863642	1412915	2257980	2594830	402799	214401	264885	306716	48.3	33.9	26.2	26.4	-1.3	0.7	1.2	0.7	1.4	0.6	1.6	0.2	1.8	0.08	1.1	0.7	0.07
Q$436	E0CXZ0	E0CXZ0_MOUSE	Nop56	Nucleolar protein 56	1	24.14	3	1861643	1506109	2182869	2643552	282679	278173	253888	323324	34	41.3	26	27.3	-1.2	0.6	1.2	0.6	1.4	0.4	1.4	0.4	1.8	0.2	1.2	0.6	0.07
Q$832	Q8BG13	Q8BG13_MOUSE	Rbm3	Putative RNA-binding protein 3	1	38.96	5	1861144	1553619	2162403	3086628	299636	172311	192021	209054	36	24.8	19.9	15.1	-1.2	0.6	1.2	0.6	1.7	0.05	1.4	0.1	2	0.003	1.4	0.05	0.001
Q$614	F7B227	F7B227_MOUSE	Ech1	Delta(3,5)-Delta(2,4)-dienoyl-CoA isomerase, mitochondrial (Fragment)	1	29.94	3	1859788	1233276	1941468	2406008	344651	136362	169179	137105	41.4	24.7	19.5	12.7	-1.5	0.3	1	0.8	1.3	0.3	1.6	0.06	2	0.002	1.2	0.2	0.01
Q$1669	Q8JZK9	HMCS1_MOUSE	Hmgcs1	Hydroxymethylglutaryl-CoA synthase, cytoplasmic	0.9999	10	2	1846972	1840382	2121629	2499218	208104	207417	282972	279390	25.2	25.2	29.8	25	-1	1	1.1	0.8	1.4	0.5	1.2	0.8	1.4	0.5	1.2	0.8	0.2
Q$1835	Q9CPV4-3	GLOD4_MOUSE	Glod	Isoform 3 of Glyoxalase domain-containing protein 4	1	23.66	5	1838514	1297067	1941133	2283771	356861	119394	220332	161643	43.4	20.6	25.4	15.8	-1.4	0.6	1.1	0.8	1.2	0.6	1.5	0.2	1.8	0.007	1.2	0.6	0.06
Q$818	O88531	PPT1_MOUSE	Ppt1	Palmitoyl-protein thioesterase 1	1	10.78	2	1837619	1596688	1742197	1922927	144267	140528	145782	170852	17.6	19.7	18.7	19.9	-1.2	0.8	-1.1	0.9	1	0.9	1.1	0.9	1.2	0.7	1.1	0.9	0.5
Q$1291	P97384	ANX11_MOUSE	Anxa11	Annexin A11	1	8.55	3	1833310	1301261	2056684	2325467	384721	139091	298150	182146	46.9	23.9	32.4	17.5	-1.4	0.6	1.1	0.7	1.3	0.6	1.6	0.2	1.8	0.01	1.1	0.7	0.09
Q$1407	Q5SX46	Q5SX46_MOUSE	Slc25a11	Mitochondrial 2-oxoglutarate/malate carrier protein (Fragment)	1	12.44	2	1829952	1374388	1840312	2249517	199579	97231	118604	206763	24.4	15.8	14.4	20.6	-1.3	0.3	1	1	1.2	0.3	1.3	0.08	1.6	0.03	1.2	0.3	0.01
Q$198	D3YXQ8	D3YXQ8_MOUSE	Ruvbl2	RuvB-like 2 (Fragment)	0.9998	4.98	1	1828315	932610	2408545	3008925	371554	123852	182251	366410	45.4	29.7	16.9	27.2	-2	0.2	1.3	0.3	1.6	0.2	2.6	0.0009	3.2	0.003	1.2	0.3	0.0007
Q$1410	Q5XJY5	COPD_MOUSE	Arcn1	Coatomer subunit delta	0.9997	4.89	2	1828104	1350864	2714230	2921473	178857	177617	287587	236438	21.9	29.4	23.7	18.1	-1.4	0.2	1.5	0.09	1.6	0.02	2	0.02	2.2	0.004	1.1	0.6	0.0004
Q$246	D3Z315	D3Z315_MOUSE	Cope	Coatomer subunit epsilon (Fragment)	0.9999	14.98	2	1826208	1484063	1633886	2736999	404548	263880	361828	206609	49.5	39.8	49.5	16.9	-1.2	0.9	-1.1	0.9	1.5	0.3	1.1	0.9	1.8	0.03	1.7	0.1	0.06
Q$782	O35465-2	FKBP8_MOUSE	Fkbp	Isoform 2 of Peptidyl-prolyl cis-trans isomerase FKBP8	1	14.39	4	1823034	1296901	1719924	1945652	301552	92602	184270	220698	37	16	24	25.4	-1.4	0.5	-1.1	0.9	1.1	0.9	1.3	0.3	1.5	0.1	1.1	0.8	0.2
Q$2052	Q9R0E1	PLOD3_MOUSE	Plod3	Procollagen-lysine,2-oxoglutarate 5-dioxygenase 3	0.9958	1.35	1	1819108	1249604	1974097	2666210	526375	301305	453336	416568	64.7	53.9	51.3	34.9	-1.5	0.7	1.1	0.8	1.5	0.7	1.6	0.7	2.1	0.1	1.4	0.7	0.2
Q$39	A2AG39	A2AG39_MOUSE	Stoml2	Stomatin-like protein 2, mitochondrial (Fragment)	1	11.54	2	1814266	1566480	2075810	1978694	134627	207788	241408	209437	16.6	29.7	26	23.7	-1.2	0.8	1.1	0.8	1.1	0.8	1.3	0.6	1.3	0.7	-1	0.8	0.3
Q$2041	Q9QYB1	CLIC4_MOUSE	Clic4	Chloride intracellular channel protein 4	1	9.88	2	1802899	1526829	2200213	2724340	274272	155607	108573	279051	34	22.8	11	22.9	-1.2	0.4	1.2	0.4	1.5	0.2	1.4	0.04	1.8	0.03	1.2	0.3	0.007
Q$493	E9Q0X0	E9Q0X0_MOUSE	Psma4	Proteasome subunit alpha type (Fragment)	1	23.02	2	1802447	1677934	1657840	1718959	143846	157134	151728	162004	17.8	20.9	20.5	21.1	-1.1	1	-1.1	1	-1	1	-1	1	1	1	1	1	0.9
Q$1254	P70288	HDAC2_MOUSE	Hdac2	Histone deacetylase 2	1	4.92	2	1802134	1393825	2136103	2958039	274462	177415	222409	406694	34.1	28.5	23.3	30.7	-1.3	0.4	1.2	0.4	1.6	0.2	1.5	0.1	2.1	0.05	1.4	0.3	0.009
Q$200	D3YXT0	D3YXT0_MOUSE	Ndufs2	NADH dehydrogenase [ubiquinone] iron-sulfur protein 2, mitochondrial	1	16.93	5	1797870	1292646	2967205	3553358	311176	141872	861599	1256946	38.7	24.5	64.9	79.1	-1.4	0.5	1.7	0.6	2	0.6	2.3	0.5	2.7	0.5	1.2	0.7	0.2
Q$1117	P52293	IMA1_MOUSE	Kpna2	Importin subunit alpha-1	1	10.4	3	1796407	1512527	2219682	3013399	162490	280815	293204	204056	20.2	41.5	29.5	15.1	-1.2	0.4	1.2	0.4	1.7	0.01	1.5	0.3	2	0.01	1.4	0.2	0.003
Q$78	A2AW41	A2AW41_MOUSE	Hnrnpr	Protein Hnrnpr (Fragment)	1	16.3	4	1793811	1498201	2132740	2967394	353840	177867	330002	444025	44.1	26.5	34.6	33.5	-1.2	0.7	1.2	0.7	1.7	0.3	1.4	0.4	2	0.09	1.4	0.4	0.04
Q$49	A2AL49	A2AL49_MOUSE	Agps	Alkyldihydroxyacetonephosphate synthase, peroxisomal	1	14.76	4	1778173	1316672	2690072	3513781	197373	148733	185473	207168	24.8	25.3	15.4	13.2	-1.4	0.1	1.5	0.03	2	0.002	2	0.002	2.7	0.0002	1.3	0.04	1e-06
Q$1579	Q80Y14	GLRX5_MOUSE	Glrx5	Glutaredoxin-related protein 5, mitochondrial	1	29.61	3	1776255	1263839	1795824	2261938	259893	97866	188047	219707	32.7	17.3	23.4	21.7	-1.4	0.4	1	1	1.3	0.4	1.4	0.2	1.8	0.02	1.3	0.4	0.02
Q$2027	Q9JMH6-2	TRXR1_MOUSE	Txnrd	Isoform 2 of Thioredoxin reductase 1, cytoplasmic	1	15.63	4	1775002	1362953	2159073	2845052	345227	214149	254740	257848	43.5	35.1	26.4	20.3	-1.3	0.6	1.2	0.6	1.6	0.2	1.6	0.2	2.1	0.01	1.3	0.3	0.01
Q$860	P06797	CATL1_MOUSE	Ctsl	Cathepsin L1	1	24.85	3	1767364	1304990	1694430	2045243	278990	116631	158566	201561	35.3	20	20.9	22	-1.4	0.5	-1	0.8	1.2	0.7	1.3	0.4	1.6	0.08	1.2	0.5	0.1
Q$1975	Q9DC61	MPPA_MOUSE	Pmpca	Mitochondrial-processing peptidase subunit alpha	1	17.56	4	1760632	1087564	2017163	2642448	373832	62797	284546	371305	47.5	12.9	31.5	31.4	-1.6	0.4	1.1	0.6	1.5	0.4	1.9	0.1	2.4	0.08	1.3	0.4	0.02
Q$574	F6T930	F6T930_MOUSE	Echs1	Enoyl-CoA hydratase, mitochondrial (Fragment)	1	5.76	1	1757370	1287190	1688595	1644065	330484	100493	145986	216610	42.1	17.5	19.3	29.5	-1.4	0.7	-1	1	-1.1	1	1.3	0.3	1.3	0.6	-1	1	0.4
Q$822	O88587-2	COMT_MOUSE	Com	Isoform Soluble of Catechol O-methyltransferase	0.9946	5.86	1	1752645	1103290	2061320	2800980	491271	255728	311310	216533	62.7	51.8	33.8	17.3	-1.6	0.5	1.2	0.6	1.6	0.3	1.9	0.2	2.5	0.006	1.4	0.3	0.02
Q$2055	Q9R0Q6	ARC1A_MOUSE	Arpc1a	Actin-related protein 2/3 complex subunit 1A	1	3.78	1	1748450	1412084	1840590	3967290	223151	201004	99305	1286318	28.5	31.8	12.1	72.5	-1.2	0.5	1.1	0.7	2.3	0.5	1.3	0.4	2.8	0.5	2.2	0.5	0.06
Q$111	P50544	ACADV_MOUSE	Acadvl	Very long-chain specific acyl-CoA dehydrogenase, mitochondrial	1	20.43	6	1744423	1458882	1848512	6829868	280685	136505	106107	4180440	36	20.9	12.8	136.9	-1.2	0.8	1.1	0.8	3.9	0.8	1.3	0.3	4.7	0.8	3.7	0.8	0.2
Q$229	D3Z0S1	D3Z0S1_MOUSE	Anxa4	Annexin (Fragment)	1	44.88	8	1743123	1627265	2009538	2093969	239646	164157	185264	180065	30.7	22.6	20.6	19.2	-1.1	0.9	1.2	0.8	1.2	0.7	1.2	0.6	1.3	0.4	1	0.9	0.3
Q$1332	Q07813	BAX_MOUSE	Bax	Apoptosis regulator BAX	0.9828	6.77	1	1742924	1696894	1586881	2706450	279975	431568	367727	341227	35.9	56.9	51.8	28.2	-1	1	-1.1	1	1.6	0.3	-1.1	1	1.6	0.4	1.7	0.3	0.1
Q$1262	P70441	NHRF1_MOUSE	Slc9a3r1	Na(+)/H(+) exchange regulatory cofactor NHE-RF1	1	7.04	2	1740256	1537582	1669736	1963434	130442	115280	89577	116882	16.8	16.8	12	13.3	-1.1	0.7	-1	0.7	1.1	0.7	1.1	0.7	1.3	0.2	1.2	0.3	0.1
Q$1545	Q6ZQI3	MLEC_MOUSE	Mlec	Malectin	1	16.49	3	1739484	1385887	1850179	2188125	289132	194254	244586	262120	37.2	31.3	29.6	26.8	-1.3	0.7	1.1	0.8	1.3	0.7	1.3	0.6	1.6	0.2	1.2	0.7	0.2
Q$1741	Q91W50	CSDE1_MOUSE	Csde1	Cold shock domain-containing protein E1	1	4.51	3	1737229	1441318	1772556	2448848	209800	94810	184940	493695	27	14.7	23.3	45.1	-1.2	0.6	1	0.9	1.4	0.6	1.2	0.6	1.7	0.5	1.4	0.6	0.1
Q$2060	Q9R1P1	PSB3_MOUSE	Psmb3	Proteasome subunit beta type-3	1	32.68	4	1735652	1546834	1627966	1963299	195206	173610	147675	136121	25.1	25.1	20.3	15.5	-1.1	0.9	-1.1	0.9	1.1	0.8	1.1	0.9	1.3	0.5	1.2	0.5	0.3
Q$1135	P55821	STMN2_MOUSE	Stmn2	Stathmin-2	1	10.61	2	1734973	923244	2151842	4775201	535580	299432	433304	1766934	69	72.5	45	82.7	-1.9	0.5	1.2	0.6	2.8	0.5	2.3	0.3	5.2	0.4	2.2	0.5	0.06
Q$1295	P97449	AMPN_MOUSE	Anpep	Aminopeptidase N	1	5.59	4	1731468	1375929	1949641	2472311	290667	234414	209477	135969	37.5	38.1	24	12.3	-1.3	0.6	1.1	0.6	1.4	0.2	1.4	0.3	1.8	0.02	1.3	0.3	0.02
Q$249	D3Z3X4	D3Z3X4_MOUSE	Cisd2	CDGSH iron-sulfur domain-containing protein 2	1	31.48	3	1730961	1580391	1701267	1829512	107796	75408	53822	159160	13.9	10.7	7.1	19.5	-1.1	0.7	-1	0.9	1.1	0.9	1.1	0.7	1.2	0.7	1.1	0.8	0.5
Q$956	P18155	MTDC_MOUSE	Mthfd2	Bifunctional methylenetetrahydrofolate dehydrogenase/cyclohydrolase, mitochondrial	1	14.29	2	1730885	1252487	2852223	3512289	357705	126947	189742	291038	46.2	22.7	14.9	18.5	-1.4	0.2	1.6	0.07	2	0.02	2.3	0.0006	2.8	0.0006	1.2	0.2	4e-05
Q$1228	P63085	MK01_MOUSE	Mapk1	Mitogen-activated protein kinase 1	0.98	2.51	1	1727347	2303884	2064748	1974436	425412	836408	764218	418161	55.1	81.2	82.8	47.4	1.3	1	1.2	1	1.1	1	-1.1	1	-1.2	1	-1	1	0.9
Q$495	E9Q132	E9Q132_MOUSE	Rpl24	60S ribosomal protein L24	1	15.79	2	1723919	1895915	1596785	2220180	213839	138194	79235	147929	27.7	16.3	11.1	14.9	1.1	0.8	-1.1	0.8	1.3	0.4	-1.2	0.4	1.2	0.4	1.4	0.03	0.05
Q$486	E9Q039	E9Q039_MOUSE	Npepps	Puromycin-sensitive aminopeptidase	1	12.94	5	1722892	1301342	1542233	7420967	284376	517489	86040	4905105	36.9	88.9	12.5	147.8	-1.3	0.9	-1.1	0.9	4.3	0.9	1.2	0.9	5.7	0.9	4.8	0.9	0.3
Q$96	A4QPC5	A4QPC5_MOUSE	Cma1	Chymase	1	15	3	1715823	1397528	1271671	1910010	247505	190349	138751	270869	32.3	30.5	24.4	31.7	-1.2	0.7	-1.3	0.6	1.1	0.8	-1.1	0.8	1.4	0.6	1.5	0.3	0.2
Q$197	D3YXK2	SAFB1_MOUSE	Safb	Scaffold attachment factor B1	0.9717	4.38	2	1714387	1231026	1675368	2743062	416543	115653	167308	373219	54.3	21	22.3	30.4	-1.4	0.5	-1	0.9	1.6	0.3	1.4	0.2	2.2	0.08	1.6	0.1	0.02
Q$702	H3BJC1	H3BJC1_MOUSE	Acaa1a	3-ketoacyl-CoA thiolase A, peroxisomal (Fragment)	1	35.71	2	1712813	1206761	1962624	2308579	275201	136873	195756	189788	35.9	25.4	22.3	18.4	-1.4	0.4	1.1	0.5	1.3	0.4	1.6	0.06	1.9	0.009	1.2	0.4	0.01
Q$906	P11672	NGAL_MOUSE	Lcn2	Neutrophil gelatinase-associated lipocalin	0.9668	6.5	1	1711486	1504035	1513099	1622980	147109	106605	100028	83410	19.2	15.8	14.8	11.5	-1.1	0.9	-1.1	0.9	-1.1	0.9	1	1	1.1	0.9	1.1	0.9	0.5
Q$19	A2A8L1	A2A8L1_MOUSE	Chd5	Protein Chd5	1	2.11	3	1709475	901872	2196656	2557053	385985	199918	321924	264383	50.5	49.6	32.8	23.1	-1.9	0.3	1.3	0.6	1.5	0.3	2.4	0.04	2.8	0.006	1.2	0.6	0.008
Q$1724	Q8VDW0-2	DX39A_MOUSE	Ddx39	Isoform 2 of ATP-dependent RNA helicase DDX39A	1	31.87	4	1705291	1517601	2023775	2771533	258300	136726	190352	348671	33.9	20.1	21	28.1	-1.1	0.6	1.2	0.6	1.6	0.2	1.3	0.2	1.8	0.06	1.4	0.3	0.01
Q$537	Q8CAQ8-2	IMMT_MOUSE	Imm	Isoform 2 of Mitochondrial inner membrane protein	1	16.89	9	1698829	1630026	1810348	2319749	148996	132451	104670	149349	19.6	18.2	12.9	14.4	-1	0.8	1.1	0.8	1.4	0.09	1.1	0.7	1.4	0.05	1.3	0.09	0.01
Q$2087	Q9WVK4	EHD1_MOUSE	Ehd1	EH domain-containing protein 1	1	11.61	3	1697626	1424505	1868379	2271742	293375	162352	160805	314691	38.6	25.5	19.2	31	-1.2	0.7	1.1	0.7	1.3	0.6	1.3	0.4	1.6	0.2	1.2	0.6	0.1
Q$598	P05555	ITAM_MOUSE	Itgam	Integrin alpha-M	1	12.23	8	1696958	1510638	1764838	1893458	133467	60855	64986	123145	17.6	9	8.2	14.5	-1.1	0.7	1	0.7	1.1	0.7	1.2	0.1	1.3	0.1	1.1	0.7	0.1
Q$828	O89023	TPP1_MOUSE	Tpp1	Tripeptidyl-peptidase 1	1	6.23	2	1695326	1487451	2142992	1979707	250026	206030	177352	185621	33	31	18.5	21	-1.1	0.8	1.3	0.6	1.2	0.8	1.4	0.2	1.3	0.5	-1.1	0.8	0.2
Q$530	E9Q6R3	E9Q6R3_MOUSE	Sec22b	Vesicle-trafficking protein SEC22b	1	26.51	3	1685008	1452147	1981055	2302304	271321	134010	309828	451922	36	20.6	35	43.9	-1.2	0.8	1.2	0.8	1.4	0.7	1.4	0.6	1.6	0.6	1.2	0.8	0.3
Q$1633	Q8BU30	SYIC_MOUSE	Iars	Isoleucine--tRNA ligase, cytoplasmic	0.9983	1.82	2	1676093	1096842	1993909	2151889	486550	69434	330112	281858	64.9	14.2	37	29.3	-1.5	0.8	1.2	0.8	1.3	0.8	1.8	0.2	2	0.1	1.1	0.8	0.2
Q$100	A8XU21	A8XU21_MOUSE	Ncf4	Neutrophil cytosol factor 4 (Fragment)	1	10	2	1675474	1454712	1763101	1972585	137437	123162	82941	191755	18.3	18.9	10.5	21.7	-1.2	0.7	1.1	0.7	1.2	0.7	1.2	0.3	1.4	0.3	1.1	0.7	0.1
Q$474	E9PYL2	E9PYL2_MOUSE	Prr12	Protein Prr12	0.9673	1.57	1	1673630	1233829	2061320	2776010	444546	163774	301056	244629	59.4	29.7	32.7	19.7	-1.4	0.6	1.2	0.6	1.7	0.2	1.7	0.2	2.2	0.005	1.3	0.3	0.02
Q$1823	Q99P91	GPNMB_MOUSE	Gpnmb	Transmembrane glycoprotein NMB	0.9999	3.48	2	1666362	775985	1388109	1956965	260119	65712	173303	66120	34.9	18.9	27.9	7.6	-2.1	0.07	-1.2	0.6	1.2	0.6	1.8	0.05	2.5	8e-06	1.4	0.06	0.0007
Q$517	E9Q4F4	E9Q4F4_MOUSE	Snrpe	Small nuclear ribonucleoprotein E	1	52.75	3	1665296	1349860	1734409	1923106	219935	135877	157618	190578	29.5	22.5	20.3	22.2	-1.2	0.7	1	0.8	1.2	0.8	1.3	0.4	1.4	0.2	1.1	0.8	0.2
Q$1654	Q8CAQ8-5	IMMT_MOUSE	Imm	Isoform 5 of Mitochondrial inner membrane protein	1	13.04	8	1659037	1589945	1765831	2267192	149211	133627	103969	144932	20.1	18.8	13.2	14.3	-1	0.8	1.1	0.8	1.4	0.09	1.1	0.7	1.4	0.05	1.3	0.09	0.01
Q$966	P20060	HEXB_MOUSE	Hexb	Beta-hexosaminidase subunit beta	0.9886	7.84	2	1658321	1239964	1786618	2800686	249545	141001	172631	568295	33.6	25.4	21.6	45.4	-1.3	0.4	1.1	0.7	1.7	0.4	1.4	0.2	2.3	0.2	1.6	0.4	0.03
Q$208	D3YYF6	D3YYF6_MOUSE	Cnbp	Cellular nucleic acid-binding protein	1	19.42	2	1654418	1161694	1745950	1901593	125082	75732	220884	203210	16.9	14.6	28.3	23.9	-1.4	0.05	1.1	0.9	1.1	0.7	1.5	0.1	1.6	0.05	1.1	0.9	0.03
Q$183	D3Z1D6	D3Z1D6_MOUSE	Gm10335	Protein Gm10335	1	12.82	3	1651211	1561069	2148193	2579385	264899	333290	476986	300071	35.9	47.7	49.6	26	-1.1	0.8	1.3	0.8	1.6	0.3	1.4	0.8	1.7	0.3	1.2	0.8	0.2
Q$2072	Q9WUA2	SYFB_MOUSE	Farsb	Phenylalanine--tRNA ligase beta subunit	0.9343	1.87	1	1643437	1700271	2120610	9014930	405355	594273	261568	5408089	55.2	78.2	27.6	134.1	1	0.9	1.3	0.8	5.5	0.8	1.2	0.8	5.3	0.8	4.3	0.8	0.2
Q$557	P57776-3	EF1D_MOUSE	Eef1	Isoform 3 of Elongation factor 1-delta	1	16.21	7	1638253	1102221	1892711	2624378	326657	198322	168799	193798	44.6	40.2	19.9	16.5	-1.5	0.4	1.2	0.5	1.6	0.09	1.7	0.08	2.4	0.003	1.4	0.08	0.002
Q$721	H7BX22	H7BX22_MOUSE	Ranbp1	Ran-specific GTPase-activating protein	1	28.1	3	1631499	1008227	1805289	2333841	261965	132378	104275	154257	35.9	29.4	12.9	14.8	-1.6	0.1	1.1	0.6	1.4	0.1	1.8	0.007	2.3	0.001	1.3	0.08	0.0006
Q$150	E0CXA2	E0CXA2_MOUSE	Cmtm1	MCG21550, isoform CRA_b	0.9785	19.18	2	1630928	1740483	7927990	7585748	216599	455583	6271073	5884765	29.7	58.5	176.9	173.5	1.1	1	4.9	0.9	4.7	0.9	4.6	0.9	4.4	0.9	-1	1	0.6
Q$1593	Q8BGH2	SAM50_MOUSE	Samm50	Sorting and assembly machinery component 50 homolog	0.9949	2.35	1	1629477	1443958	2910810	2462124	208648	229453	693538	391569	28.6	35.5	53.3	35.6	-1.1	0.8	1.8	0.4	1.5	0.3	2	0.3	1.7	0.3	-1.2	0.8	0.09
Q$936	P16332	MUTA_MOUSE	Mut	Methylmalonyl-CoA mutase, mitochondrial	0.9776	1.47	1	1623445	1443450	1979280	2644470	382993	193244	198261	210765	52.8	29.9	22.4	17.8	-1.1	0.7	1.2	0.7	1.6	0.2	1.4	0.2	1.8	0.02	1.3	0.2	0.02
Q$2104	Q9Z2I8-2	SUCB2_MOUSE	Suclg	Isoform 2 of Succinyl-CoA ligase [GDP-forming] subunit beta, mitochondrial	1	6.25	2	1621478	1698640	1687828	1796619	396249	413014	434173	417712	54.6	54.4	57.5	52	1	1	1	1	1.1	1	-1	1	1.1	1	1.1	1	1
Q$1688	Q8K4Z3	NNRE_MOUSE	Apoa1bp	NAD(P)H-hydrate epimerase	0.9375	4.26	1	1619929	1190772	1603870	1843372	329637	179287	302334	253797	45.5	33.7	42.2	30.8	-1.4	0.8	-1	1	1.1	0.9	1.3	0.8	1.5	0.3	1.1	0.9	0.4
Q$193	Q8BX46-2	SKOR1_MOUSE	Skor	Isoform 2 of SKI family transcriptional corepressor 1	0.9795	9.72	2	1619748	1527068	1570873	1358816	88909	110015	154608	48607	12.3	16.1	22	8	-1.1	0.9	-1	1	-1.2	0.2	1	1	-1.1	0.7	-1.2	0.7	0.4
Q$220	D3YZX3	D3YZX3_MOUSE	Gnb2	Guanine nucleotide-binding protein G(I)/G(S)/G(T) subunit beta-2	1	51.69	10	1618058	1280691	1740971	2137730	237421	142896	104347	148099	32.8	24.9	13.4	15.5	-1.3	0.4	1.1	0.6	1.3	0.3	1.4	0.1	1.7	0.02	1.2	0.2	0.02
Q$1768	Q922W5	P5CR1_MOUSE	Pycr1	Pyrroline-5-carboxylate reductase 1, mitochondrial	1	11	3	1616070	1567368	1788619	1920335	144429	220344	179565	133746	20	31.4	22.4	15.6	-1	0.9	1.1	0.9	1.2	0.7	1.1	0.9	1.2	0.7	1.1	0.9	0.5
Q$1760	Q921L3	TMCO1_MOUSE	Tmco1	Transmembrane and coiled-coil domain-containing protein 1	0.959	7.98	1	1609625	1533350	1572090	2055890	181435	104476	128087	323680	25.2	15.2	18.2	35.2	-1	1	-1	1	1.3	0.7	1	1	1.3	0.7	1.3	0.7	0.3
Q$1681	Q8K209	GPR56_MOUSE	Gpr56	G-protein coupled receptor 56	0.9996	3.49	2	1603057	903725	1514300	2308244	500399	112012	273046	763721	69.8	27.7	40.3	74	-1.8	0.7	-1.1	0.9	1.4	0.7	1.7	0.4	2.6	0.5	1.5	0.7	0.3
Q$2056	Q9R111	GUAD_MOUSE	Gda	Guanine deaminase	1	11.67	3	1589701	1168711	1518091	1725061	241627	76997	151248	117655	34	14.7	22.3	15.3	-1.4	0.5	-1	0.9	1.1	0.9	1.3	0.3	1.5	0.02	1.1	0.7	0.1
Q$1810	Q99LT0	DPY30_MOUSE	Dpy30	Protein dpy-30 homolog	1	20.2	1	1588100	1413530	1395739	1465880	273133	163019	177914	168427	38.5	25.8	28.5	25.7	-1.1	1	-1.1	1	-1.1	1	-1	1	1	1	1.1	1	0.9
Q$1642	Q8C129	LCAP_MOUSE	Lnpep	Leucyl-cystinyl aminopeptidase	0.9211	1.27	1	1587092	1235755	3467750	4121480	262594	193577	1693406	414535	37	35	109.2	22.5	-1.3	0.7	2.2	0.7	2.6	0.004	2.8	0.7	3.3	0.001	1.2	0.7	0.09
Q$724	Q6ZWV3	RL10_MOUSE	Rpl10	60S ribosomal protein L10	1	19.63	5	1585085	1357349	1539948	2206868	272713	226696	99679	152350	38.5	37.3	14.5	15.4	-1.2	0.9	-1	0.9	1.4	0.3	1.1	0.9	1.6	0.07	1.4	0.04	0.04
Q$998	P26516	PSMD7_MOUSE	Psmd7	26S proteasome non-ATPase regulatory subunit 7	1	15.26	3	1578486	1311173	1700297	1654448	120874	186729	344952	200593	17.1	31.8	45.4	27.1	-1.2	0.8	1.1	1	1	1	1.3	0.8	1.3	0.8	-1	1	0.6
Q$1927	Q9D1P4	CHRD1_MOUSE	Chordc1	Cysteine and histidine-rich domain-containing protein 1	0.9227	4.53	1	1576490	1567370	1552660	1845230	171596	85584	142602	277537	24.3	12.2	20.5	33.6	-1	1	-1	1	1.2	0.9	-1	1	1.2	0.9	1.2	0.9	0.6
Q$1413	Q60604-2	ADSV_MOUSE	Sci	Isoform 2 of Adseverin	1	4.39	2	1567404	1357689	1579990	1710282	272188	239397	258562	241957	38.8	39.4	36.6	31.6	-1.2	1	1	1	1.1	1	1.2	1	1.3	0.9	1.1	1	0.8
Q$592	F6WR45	F6WR45_MOUSE	Chd4	Chromodomain-helicase-DNA-binding protein 4 (Fragment)	1	7.21	2	1560484	761840	1968355	2397319	379632	188615	262339	261412	54.4	55.4	29.8	24.4	-2	0.3	1.3	0.5	1.5	0.3	2.6	0.03	3.1	0.006	1.2	0.5	0.006
Q$1400	Q5RI75-2	RASEF_MOUSE	Rase	Isoform 2 of Ras and EF-hand domain-containing protein homolog	1	1.98	1	1559440	1439780	757737	9868425	225823	930798	136189	6963462	32.4	144.6	40.2	157.8	-1.1	0.9	-2.1	0.09	6.3	0.8	-1.9	0.8	6.9	0.8	13	0.8	0.2
Q$1015	P29387	GBB4_MOUSE	Gnb4	Guanine nucleotide-binding protein subunit beta-4	1	3.53	1	1556934	1263095	1647753	3088540	424922	257278	317634	423094	61	45.5	43.1	30.6	-1.2	0.8	1.1	0.9	2	0.1	1.3	0.8	2.4	0.04	1.9	0.1	0.01
Q$429	E0CX19	E0CX19_MOUSE	Hibch	3-hydroxyisobutyryl-CoA hydrolase, mitochondrial	0.9947	11.58	2	1556609	1419131	1755476	1924309	209046	238532	488475	242024	30	37.6	62.2	28.1	-1.1	1	1.1	1	1.2	0.8	1.2	1	1.4	0.7	1.1	1	0.7
Q$1584	Q812F8	MGT4B_MOUSE	Mgat4b	Alpha-1,3-mannosyl-glycoprotein 4-beta-N-acetylglucosaminyltransferase B	0.9104	3.28	1	1555171	1057536	1985135	3279230	385064	185357	276952	528843	55.4	39.2	31.2	36.1	-1.5	0.5	1.3	0.5	2.1	0.1	1.9	0.1	3.1	0.02	1.7	0.2	0.004
Q$1374	Q9JII5-2	DAZP1_MOUSE	Dazap	Isoform 2 of DAZ-associated protein 1	1	16.79	4	1534043	1182204	1895181	2860604	303522	182617	185837	277847	44.2	34.5	21.9	21.7	-1.3	0.6	1.2	0.6	1.9	0.06	1.6	0.08	2.4	0.006	1.5	0.08	0.001
Q$156	D3YTQ8	D3YTQ8_MOUSE	Ndufa5	NADH dehydrogenase (Ubiquinone) 1 alpha subcomplex, 5, isoform CRA_a	1	33.77	2	1531887	1482359	1719801	2079412	257854	180043	166880	63677	37.6	27.2	21.7	6.8	-1	0.9	1.1	0.8	1.4	0.3	1.2	0.7	1.4	0.08	1.2	0.3	0.1
Q$222	D3Z041	D3Z041_MOUSE	Acsl1	Long-chain-fatty-acid--CoA ligase 1	1	9.59	5	1528056	1150902	1702706	2402132	211642	77769	246422	306569	31	15.1	32.4	28.5	-1.3	0.3	1.1	0.6	1.6	0.2	1.5	0.3	2.1	0.08	1.4	0.3	0.01
Q$481	P97822-2	AN32E_MOUSE	Anp32	Isoform 2 of Acidic leucine-rich nuclear phosphoprotein 32 family member E	1	18.55	4	1526934	1130801	2586264	2779012	292874	175011	804818	469829	42.9	34.6	69.6	37.8	-1.4	0.6	1.7	0.6	1.8	0.2	2.3	0.5	2.5	0.06	1.1	0.8	0.09
Q$1825	Q99PU7	BAP1_MOUSE	Bap1	Ubiquitin carboxyl-terminal hydrolase BAP1	0.9777	1.24	1	1517007	926583	931100	1280734	321456	284855	324338	313798	47.4	68.7	77.9	54.8	-1.6	0.8	-1.6	0.8	-1.2	0.9	1	1	1.4	0.9	1.4	0.9	0.5
Q$549	E9QAT6	E9QAT6_MOUSE	Cad	DNA fragmentation factor subunit beta	1	6.69	4	1515700	1208186	1680370	1834302	166624	86429	177811	159335	24.6	16	23.7	19.4	-1.3	0.5	1.1	0.8	1.2	0.5	1.4	0.2	1.5	0.05	1.1	0.8	0.06
Q$1333	Q8R050-2	ERF3A_MOUSE	Gspt	Isoform 2 of Eukaryotic peptide chain release factor GTP-binding subunit ERF3A	0.996	5.35	2	1512325	1280183	930163	1467375	639888	530964	225515	324649	94.6	92.7	54.2	49.5	-1.2	1	-1.6	0.9	-1	1	-1.4	1	1.1	1	1.6	0.8	0.8
Q$1896	Q9CYN2	SPCS2_MOUSE	Spcs2	Signal peptidase complex subunit 2	0.9996	8.41	1	1503396	998409	1314676	1573683	307372	195336	134751	280867	45.7	43.7	22.9	39.9	-1.5	0.7	-1.1	0.8	1	0.9	1.3	0.7	1.6	0.6	1.2	0.8	0.4
Q$1376	Q3UHD9-2	AGAP2_MOUSE	Agap	Isoform 2 of Arf-GAP with GTPase, ANK repeat and PH domain-containing protein 2	0.9674	6.52	2	1497984	1029308	1870291	2249759	364137	145873	276822	231700	54.4	31.7	33.1	23	-1.5	0.6	1.2	0.6	1.5	0.4	1.8	0.1	2.2	0.01	1.2	0.6	0.03
Q$1084	P47791-2	GSHR_MOUSE	Gs	Isoform Cytoplasmic of Glutathione reductase, mitochondrial	0.9997	9.28	2	1486653	1235591	1729393	1907004	153911	104642	130795	191812	23.1	18.9	16.9	22.5	-1.2	0.5	1.2	0.5	1.3	0.4	1.4	0.09	1.5	0.09	1.1	0.5	0.03
Q$508	E9Q3E2	E9Q3E2_MOUSE	Synpo	Synaptopodin	0.9528	0.82	1	1484385	1368530	1639705	2299395	208398	101891	368973	437565	31.4	16.6	50.3	42.6	-1.1	0.9	1.1	0.9	1.5	0.5	1.2	0.9	1.7	0.5	1.4	0.7	0.2
Q$777	O35290	ECP3_MOUSE	Ear3	Eosinophil cationic-type ribonuclease 3	1	19.23	1	1481885	1370545	2082355	2304975	291634	105809	243961	273086	44	17.3	26.2	26.5	-1.1	0.8	1.4	0.4	1.6	0.3	1.5	0.1	1.7	0.07	1.1	0.8	0.04
Q$490	E9Q0K6	E9Q0K6_MOUSE	Samhd1	Deoxynucleoside triphosphate triphosphohydrolase SAMHD1	1	11.21	5	1477252	1145733	1482590	1618629	148798	77968	14330	100618	22.5	15.2	2.2	13.9	-1.3	0.3	1	1	1.1	0.7	1.3	0.06	1.4	0.03	1.1	0.6	0.02
Q$223	Q3U108-2	ARI5A_MOUSE	Arid5	Isoform 2 of AT-rich interactive domain-containing protein 5A	0.9269	1.78	1	1471912	1042952	1676452	2184850	277071	292033	153804	196255	42.1	62.6	20.5	20.1	-1.4	0.5	1.1	0.5	1.5	0.3	1.6	0.3	2.1	0.07	1.3	0.3	0.03
Q$738	Q3UW83	Q3UW83_MOUSE	Rps10	40S ribosomal protein S10	1	16.23	2	1459453	1204346	1737487	3304935	240171	207098	243662	605825	36.8	38.5	31.4	41	-1.2	0.7	1.2	0.7	2.3	0.1	1.4	0.4	2.7	0.07	1.9	0.2	0.004
Q$80	A2BE92	A2BE92_MOUSE	Set	Protein SET (Fragment)	1	37.09	4	1456878	1272661	1522853	1748307	199917	116020	205229	235289	30.7	20.4	30.1	30.1	-1.1	0.9	1	0.9	1.2	0.9	1.2	0.9	1.4	0.5	1.1	0.9	0.4
Q$1348	Q3THS6	METK2_MOUSE	Mat2a	S-adenosylmethionine synthase isoform type-2	1	6.08	2	1453815	1205379	1226896	2059619	152773	126608	91905	387425	23.5	23.5	16.8	42.1	-1.2	0.6	-1.2	0.6	1.4	0.6	1	0.9	1.7	0.4	1.7	0.4	0.05
Q$714	H3BKR2	H3BKR2_MOUSE	Gnb1	Guanine nucleotide-binding protein G(I)/G(S)/G(T) subunit beta-1 (Fragment)	1	15.33	3	1450646	1131744	1603852	2254841	215056	77435	86502	428263	33.1	15.3	12.1	42.5	-1.3	0.5	1.1	0.5	1.6	0.4	1.4	0.02	2	0.3	1.4	0.5	0.03
Q$1002	P26955	IL3RB_MOUSE	Csf2rb	Cytokine receptor common subunit beta	1	2.46	2	1450039	1085357	2257562	2568615	221806	171528	261530	462465	34.2	35.3	25.9	40.3	-1.3	0.4	1.6	0.2	1.8	0.2	2.1	0.03	2.4	0.08	1.1	0.6	0.01
Q$1755	Q91ZJ5-2	UGPA_MOUSE	Ugp	Isoform 2 of UTP--glucose-1-phosphate uridylyltransferase	0.9939	7.65	2	1445257	753917	1710551	1885312	449165	149022	287592	249779	69.5	44.2	37.6	29.6	-1.9	0.6	1.2	0.9	1.3	0.8	2.3	0.09	2.5	0.03	1.1	0.9	0.08
Q$1600	Q8BH80	Q8BH80_MOUSE	Vapb	Vesicle-associated membrane protein, associated protein B and C	0.9887	4.94	1	1444895	765295	1624475	2209645	493911	175851	277002	312135	76.4	51.4	38.1	31.6	-1.9	0.6	1.1	0.8	1.5	0.6	2.1	0.1	2.9	0.02	1.4	0.6	0.05
Q$1445	Q923F1	Q923F1_MOUSE	Clns1a	Chloride channel, nucleotide-sensitive, 1A	0.9729	5.39	1	1443104	822371	1641840	2102795	311557	259622	312436	111052	48.3	70.6	42.6	11.8	-1.8	0.4	1.1	0.7	1.5	0.3	2	0.3	2.6	0.01	1.3	0.4	0.02
Q$734	P28650-2	PURA1_MOUSE	Adssl	Isoform 2 of Adenylosuccinate synthetase isozyme 1	0.9536	2.92	1	1431597	1488630	1371720	1604177	344667	349874	325908	384813	53.8	52.6	53.1	53.6	1	1	-1	1	1.1	1	-1.1	1	1.1	1	1.2	1	1
Q$1743	Q91WK5	GCSH_MOUSE	Gcsh	Glycine cleavage system H protein, mitochondrial	0.9317	5.88	1	1402903	1212279	1656000	1812060	194718	141223	150761	94850	31	26	20.4	11.7	-1.2	0.7	1.2	0.7	1.3	0.3	1.4	0.3	1.5	0.05	1.1	0.7	0.05
Q$1426	Q60963	PAFA_MOUSE	Pla2g7	Platelet-activating factor acetylhydrolase	0.9989	7.95	2	1398583	1188651	1351941	1640353	188233	100694	87945	175587	30.1	18.9	14.5	23.9	-1.2	0.7	-1	0.8	1.2	0.7	1.1	0.7	1.4	0.3	1.2	0.6	0.2
Q$1950	Q9D892	ITPA_MOUSE	Itpa	Inosine triphosphate pyrophosphatase	0.9998	26.26	2	1397365	1097813	1849667	2904855	297757	100541	303847	608996	47.6	20.5	36.7	46.9	-1.3	0.5	1.3	0.5	2.1	0.2	1.7	0.2	2.6	0.2	1.6	0.4	0.02
Q$1167	P61514	RL37A_MOUSE	Rpl37a	60S ribosomal protein L37a	0.9956	32.61	2	1394847	1332782	1633700	2603407	327635	250199	191503	362066	52.5	42	26.2	31.1	-1	0.9	1.2	0.8	1.9	0.2	1.2	0.7	2	0.1	1.6	0.2	0.02
Q$1342	Q3TDQ1	STT3B_MOUSE	Stt3b	Dolichyl-diphosphooligosaccharide--protein glycosyltransferase subunit STT3B	0.9998	3.16	2	1391337	1217233	1210875	1589587	183149	105537	87069	97498	29.4	19.4	16.1	13.7	-1.1	0.8	-1.1	0.8	1.1	0.8	-1	1	1.3	0.2	1.3	0.1	0.1
Q$1237	P63280	UBC9_MOUSE	Ube2i	SUMO-conjugating enzyme UBC9	1	27.85	3	1390843	973420	1716201	1915359	271521	144722	166234	266855	43.7	33.2	21.7	31.2	-1.4	0.6	1.2	0.6	1.4	0.6	1.8	0.06	2	0.07	1.1	0.6	0.04
Q$1223	P63024	VAMP3_MOUSE	Vamp3	Vesicle-associated membrane protein 3	0.9999	38.83	2	1381115	1234291	1264822	1433055	148821	48179	102468	127342	24.1	8.7	18.1	19.9	-1.1	0.9	-1.1	0.9	1	1	1	1	1.2	0.7	1.1	0.9	0.6
Q$1276	P83940	ELOC_MOUSE	Tceb1	Transcription elongation factor B polypeptide 1	1	30.36	2	1378557	1128285	1196735	1613235	146010	95560	65253	162967	23.7	18.9	12.2	22.6	-1.2	0.6	-1.2	0.6	1.2	0.6	1.1	0.6	1.4	0.2	1.3	0.2	0.06
Q$1496	Q63ZW6	Q63ZW6_MOUSE	Col4a5	Col4a5 protein	0.9991	3.31	1	1373061	916941	1598555	1534021	106457	117495	202649	221183	17.3	28.7	28.3	32.2	-1.5	0.1	1.2	0.7	1.1	0.8	1.7	0.1	1.7	0.1	-1	0.8	0.05
Q$1863	Q9CQX8	RT36_MOUSE	Mrps36	28S ribosomal protein S36, mitochondrial	0.9996	23.53	2	1358206	1109592	1524770	1212901	119111	187256	138542	110245	19.6	37.7	20.3	20.3	-1.2	0.8	1.1	0.8	-1.1	0.8	1.4	0.5	1.1	0.8	-1.3	0.5	0.2
Q$613	F7ANV6	F7ANV6_MOUSE	Anxa4	Annexin (Fragment)	1	30.23	5	1356974	1274947	1640664	1634878	195920	129298	148064	143850	32.3	22.7	20.2	19.7	-1.1	0.9	1.2	0.7	1.2	0.7	1.3	0.5	1.3	0.5	-1	1	0.3
Q$1787	Q99K85	SERC_MOUSE	Psat1	Phosphoserine aminotransferase	1	12.7	3	1340178	993219	1128737	1548472	148270	81122	93612	210302	24.7	18.3	18.5	30.4	-1.3	0.3	-1.2	0.6	1.2	0.6	1.1	0.6	1.6	0.2	1.4	0.4	0.07
Q$618	F7BX42	F7BX42_MOUSE	Nptxr	Neuronal pentraxin receptor	0.9143	12.17	1	1338240	1079215	1447120	1305215	158497	149508	49896	198021	26.5	31	7.7	33.9	-1.2	0.8	1.1	0.9	-1	0.9	1.3	0.3	1.2	0.9	-1.1	0.9	0.4
Q$582	F6VBB8	F6VBB8_MOUSE	Gm4978	MCG5732	1	11.61	2	1333805	1045935	1554876	2051549	300956	230015	275559	196459	50.5	49.2	39.6	21.4	-1.3	0.7	1.2	0.7	1.5	0.3	1.5	0.5	2	0.06	1.3	0.5	0.07
Q$1378	Q3UHX2	HAP28_MOUSE	Pdap1	28 kDa heat- and acid-stable phosphoprotein	0.9764	8.84	1	1319105	836362	1055083	1332920	269492	77913	78861	80823	45.7	20.8	16.7	13.6	-1.6	0.4	-1.3	0.6	1	1	1.3	0.3	1.6	0.01	1.3	0.2	0.1
Q$753	O08583-2	THOC4_MOUSE	Alyre	Isoform 2 of THO complex subunit 4	1	38.65	3	1313465	1194848	1338660	1650532	219276	178289	146192	199547	37.3	33.4	24.4	27	-1.1	0.9	1	0.9	1.3	0.8	1.1	0.9	1.4	0.6	1.2	0.8	0.4
Q$1970	Q9DBL1	ACDSB_MOUSE	Acadsb	Short/branched chain specific acyl-CoA dehydrogenase, mitochondrial	1	12.27	3	1312658	1175089	1314334	1788174	136430	125283	98476	144123	23.2	23.8	16.8	18	-1.1	0.8	1	1	1.4	0.2	1.1	0.8	1.5	0.07	1.4	0.1	0.02
Q$1017	P29416	HEXA_MOUSE	Hexa	Beta-hexosaminidase subunit alpha	0.9359	2.08	1	1310101	784219	1344952	1893170	289911	70464	129535	263542	49.5	20.1	21.5	31.1	-1.7	0.4	1	0.9	1.4	0.4	1.7	0.03	2.4	0.06	1.4	0.3	0.02
Q$1417	Q60631-2	GRB2_MOUSE	Grb	Isoform 2 of Growth factor receptor-bound protein 2	0.9997	23.3	2	1301797	798370	1419705	1999305	225451	78444	68415	171454	38.7	22	10.8	19.2	-1.6	0.1	1.1	0.6	1.5	0.1	1.8	0.002	2.5	0.001	1.4	0.05	0.0004
Q$551	E9QAY6	E9QAY6_MOUSE	Immt	Mitochondrial inner membrane protein	1	19.15	7	1301093	1135605	1336009	1821364	126969	88972	67412	117878	21.8	17.5	11.3	14.5	-1.1	0.5	1	0.8	1.4	0.07	1.2	0.3	1.6	0.01	1.4	0.04	0.002
Q$1370	Q3UE92	Q3UE92_MOUSE	Xpnpep1	X-prolyl aminopeptidase (Aminopeptidase P) 1, soluble, isoform CRA_b	1	7.06	3	1293431	1183114	1370710	1553169	72172	120099	88174	98905	12.5	22.7	14.4	14.2	-1.1	0.7	1.1	0.7	1.2	0.3	1.2	0.6	1.3	0.2	1.1	0.6	0.09
Q$1614	Q8BK67	RCC2_MOUSE	Rcc2	Protein RCC2	0.9679	7.31	2	1287257	1407629	1824609	2042459	189209	491280	479280	214108	32.9	78	58.7	23.4	1.1	0.9	1.4	0.8	1.6	0.2	1.3	0.9	1.5	0.8	1.1	0.9	0.5
Q$773	O35143	ATIF1_MOUSE	Atpif1	ATPase inhibitor, mitochondrial	1	15.09	3	1279187	925756	1210190	1739597	270047	141344	189361	192897	47.2	34.1	35	24.8	-1.4	0.6	-1.1	0.8	1.4	0.6	1.3	0.6	1.9	0.05	1.4	0.4	0.08
Q$237	D3Z1M3	D3Z1M3_MOUSE	Mlec	Malectin	1	10.96	2	1271687	974213	1292044	1472796	285555	154392	199775	174119	50.2	35.4	34.6	26.4	-1.3	0.9	1	1	1.2	0.9	1.3	0.8	1.5	0.3	1.1	0.9	0.4
Q$1526	Q6NZD2	Q6NZD2_MOUSE	Snx1	Sorting nexin 1	1	7.68	3	1271129	891748	1343551	1828312	312388	138765	195979	229464	55	34.8	32.6	28.1	-1.4	0.5	1.1	0.8	1.4	0.5	1.5	0.4	2.1	0.05	1.4	0.5	0.07
Q$1666	Q8CIH5	PLCG2_MOUSE	Plcg2	1-phosphatidylinositol 4,5-bisphosphate phosphodiesterase gamma-2	0.9057	1.11	1	1269958	833359	1579880	1825080	271729	152765	169403	35505	47.8	41	24	4.4	-1.5	0.5	1.2	0.5	1.4	0.4	1.9	0.06	2.2	0.01	1.2	0.5	0.007
Q$522	E9Q5B5	E9Q5B5_MOUSE	Hk2	Hexokinase-2	1	8.55	6	1269689	1071164	1225867	1445608	138738	53102	98230	134518	24.4	11.1	17.9	20.8	-1.2	0.7	-1	0.8	1.1	0.7	1.1	0.7	1.3	0.2	1.2	0.7	0.2
Q$269	D3Z6N3	D3Z6N3_MOUSE	Mcm7	DNA replication licensing factor MCM7	1	7.46	2	1269559	1386692	1788437	4379440	149956	490684	409875	1805930	26.4	79.1	51.2	92.2	1.1	0.8	1.4	0.6	3.4	0.6	1.3	0.8	3.2	0.6	2.4	0.6	0.1
Q$543	Q9JJG0-2	TACC2_MOUSE	Tacc	Isoform 2 of Transforming acidic coiled-coil-containing protein 2	0.9789	10.43	2	1266276	919838	1458596	1569696	187789	101600	128084	105850	33.2	24.7	19.6	15.1	-1.4	0.5	1.2	0.7	1.2	0.5	1.6	0.05	1.7	0.01	1.1	0.7	0.02
Q$15	A2A7S7	A2A7S7_MOUSE	Yars	Tyrosine--tRNA ligase, cytoplasmic	0.9993	12.23	4	1262235	978675	1265619	6279156	231892	215725	172813	4411736	41.1	49.3	30.5	157.1	-1.3	0.9	1	1	5	0.9	1.3	0.9	6.4	0.9	5	0.9	0.3
Q$571	F6RSK3	F6RSK3_MOUSE	Gm17430	Protein Gm17430	1	5.1	1	1261960	1429157	1116870	1731970	136813	112221	64282	128077	24.2	17.6	12.9	16.5	1.1	0.6	-1.1	0.6	1.4	0.2	-1.3	0.2	1.2	0.3	1.6	0.02	0.009
Q$1909	Q9D0J8	PTMS_MOUSE	Ptms	Parathymosin	0.965	10.89	1	1261539	722262	1895870	2536290	375282	166010	221620	318219	66.5	51.4	26.1	28.1	-1.7	0.4	1.5	0.4	2	0.1	2.6	0.01	3.5	0.006	1.3	0.4	0.002
Q$285	Q64737-2	PUR2_MOUSE	Gar	Isoform Short of Trifunctional purine biosynthetic protein adenosine-3	1	9.01	2	1258084	786133	1196442	1766965	235755	111826	164262	376846	41.9	31.8	30.7	47.7	-1.6	0.4	-1.1	0.8	1.4	0.5	1.5	0.3	2.2	0.3	1.5	0.5	0.08
Q$1078	P46656	ADX_MOUSE	Fdx1	Adrenodoxin, mitochondrial	0.9841	4.79	1	1257420	1082733	1117203	1899093	113202	72890	119120	774599	20.1	15.1	23.8	91.2	-1.2	0.8	-1.1	0.9	1.5	0.9	1	0.9	1.8	0.9	1.7	0.9	0.5
Q$1889	Q9CY58-4	PAIRB_MOUSE	Serbp	Isoform 4 of Plasminogen activator inhibitor 1 RNA-binding protein	1	23.83	4	1256916	968931	1411826	1567670	262871	108274	49806	95798	46.8	25	7.9	13.7	-1.3	0.7	1.1	0.7	1.2	0.7	1.5	0.03	1.6	0.02	1.1	0.6	0.07
Q$946	P17427	AP2A2_MOUSE	Ap2a2	AP-2 complex subunit alpha-2	1	2.56	2	1255336	1107038	1233941	1379971	151748	89376	97065	101899	27	18.1	17.6	16.5	-1.1	0.9	-1	0.9	1.1	0.9	1.1	0.9	1.2	0.4	1.1	0.9	0.4
Q$621	F7CHQ7	F7CHQ7_MOUSE	Nop56	Nucleolar protein 56 (Fragment)	1	26.13	5	1254287	965151	1413386	1790439	94301	52762	83267	126901	16.8	12.2	13.2	15.8	-1.3	0.08	1.1	0.2	1.4	0.04	1.5	0.009	1.9	0.002	1.3	0.08	0.0001
Q$566	F6QYF8	F6QYF8_MOUSE	Npepps	Puromycin-sensitive aminopeptidase (Fragment)	1	7.76	3	1246658	1010885	915204	6791251	231243	503201	31510	4953277	41.5	111.3	7.7	163.1	-1.2	0.9	-1.4	0.8	5.4	0.8	-1.1	0.9	6.7	0.8	7.4	0.8	0.3
Q$1657	Q8CBM2	Q8CBM2_MOUSE	Asph	Aspartyl/asparaginyl beta-hydroxylase	1	10.79	4	1240881	864992	1207728	1467948	235297	89488	86980	160852	42.4	23.1	16.1	24.5	-1.4	0.5	-1	0.9	1.2	0.7	1.4	0.1	1.7	0.07	1.2	0.5	0.09
Q$679	G3X956	G3X956_MOUSE	Supt16	FACT complex subunit SPT16	0.9999	3.63	3	1238333	1107504	1287224	1655895	61900	34414	62276	201379	11.2	6.9	10.8	27.2	-1.1	0.3	1	0.6	1.3	0.3	1.2	0.2	1.5	0.2	1.3	0.3	0.02
Q$68	A2ATI6	A2ATI6_MOUSE	Gorasp2	Golgi reassembly stacking protein 2, isoform CRA_c	0.9971	8.26	2	1230969	1078921	1442775	1560880	232943	71068	144064	107945	42.3	14.7	22.3	15.5	-1.1	0.8	1.2	0.8	1.3	0.7	1.3	0.2	1.4	0.03	1.1	0.8	0.2
Q$712	H3BKN2	H3BKN2_MOUSE	Agps	Alkyldihydroxyacetonephosphate synthase, peroxisomal	1	5.11	2	1222538	913462	2106414	2896177	136456	119101	156718	190177	25	29.2	16.6	14.7	-1.3	0.1	1.7	0.008	2.4	0.0005	2.3	0.001	3.2	0.0001	1.4	0.02	3e-07
Q$2094	Q9Z127	LAT1_MOUSE	Slc7a5	Large neutral amino acids transporter small subunit 1	1	5.86	2	1221889	939804	1320552	1161724	136482	104620	195429	95065	25	24.9	33.1	18.3	-1.3	0.5	1.1	0.9	-1.1	0.9	1.4	0.5	1.2	0.5	-1.1	0.9	0.3
Q$60	G5E920	G5E920_MOUSE	Gm6104	MCG114640	0.9999	16	2	1221604	894497	1394015	1876537	218416	128966	174163	153659	40	32.2	27.9	18.3	-1.4	0.4	1.1	0.6	1.5	0.2	1.6	0.2	2.1	0.007	1.3	0.2	0.008
Q$432	E0CXB1	E0CXB1_MOUSE	Psma6	Proteasome subunit alpha type-6	1	31.28	3	1220654	1189512	1272918	1590097	183574	173627	90490	199485	33.6	32.6	15.9	28.1	-1	1	1	1	1.3	0.7	1.1	1	1.3	0.7	1.2	0.7	0.3
Q$1933	Q9D2R0	AACS_MOUSE	Aacs	Acetoacetyl-CoA synthetase	0.9991	2.98	2	1218705	999068	1152034	1303126	153874	132787	99378	107810	28.2	29.7	19.3	18.5	-1.2	0.8	-1.1	0.9	1.1	0.9	1.2	0.8	1.3	0.5	1.1	0.8	0.4
Q$2070	Q9WTX5	SKP1_MOUSE	Skp1	S-phase kinase-associated protein 1	1	28.22	2	1217773	1027946	1369650	1700762	208585	141244	78564	137895	38.3	30.7	12.8	18.1	-1.2	0.7	1.1	0.7	1.4	0.3	1.3	0.3	1.7	0.05	1.2	0.3	0.04
Q$66	A2ASS6	TITIN_MOUSE	Ttn	Titin	0.9998	0.19	2	1215926	936331	5877049	5492797	136552	123732	4364985	3746575	25.1	29.5	166.1	152.5	-1.3	0.7	4.8	0.8	4.5	0.8	6.3	0.8	5.9	0.8	-1.1	0.9	0.5
Q$973	P21812	MCPT4_MOUSE	Mcpt4	Mast cell protease 4	1	9.35	2	1208133	977290	1433094	1598768	190455	119728	206072	253682	35.3	27.4	32.2	35.5	-1.2	0.7	1.2	0.7	1.3	0.7	1.5	0.4	1.6	0.3	1.1	0.7	0.2
Q$1024	P31310	HXA10_MOUSE	Hoxa10	Homeobox protein Hox-A10	0.9372	8.17	1	1203884	1027623	1262037	1069034	264355	264197	299808	187301	49.1	57.5	53.1	39.2	-1.2	1	1	1	-1.1	1	1.2	1	1	1	-1.2	1	0.9
Q$829	O89051	ITM2B_MOUSE	Itm2b	Integral membrane protein 2B	0.9997	4.51	2	1203737	578868	1324792	2380293	243605	86045	154948	472188	45.3	33.2	26.2	44.4	-2.1	0.2	1.1	0.7	2	0.2	2.3	0.02	4.1	0.09	1.8	0.2	0.003
Q$491	Q61699	HS105_MOUSE	Hsph1	Heat shock protein 105 kDa	1	7.46	5	1197339	943554	1642920	1749554	139678	92201	454581	119112	26.1	21.9	61.9	15.2	-1.3	0.5	1.4	0.6	1.5	0.08	1.7	0.5	1.9	0.004	1.1	0.8	0.1
Q$144	B7ZC27	B7ZC27_MOUSE	Prpf8	Pre-mRNA-processing-splicing factor 8 (Fragment)	1	5.56	3	1194199	1136681	1562672	2154360	135828	99179	162412	183083	25.4	19.5	23.2	19	-1.1	0.7	1.3	0.2	1.8	0.01	1.4	0.2	1.9	0.007	1.4	0.2	0.0006
Q$2121	S4R2M6	S4R2M6_MOUSE	Rbm3	MCG116386, isoform CRA_c	1	55.56	4	1193240	999647	1375748	1974194	203873	129310	113162	125392	38.2	28.9	18.4	14.2	-1.2	0.7	1.2	0.7	1.7	0.05	1.4	0.2	2	0.004	1.4	0.04	0.002
Q$281	D3Z7Q5	D3Z7Q5_MOUSE	Pdcd5	Programmed cell death protein 5	0.9945	6.34	1	1188370	786258	1169105	1173790	170850	83617	120665	68746	32.1	23.8	23.1	13.1	-1.5	0.2	-1	1	-1	1	1.5	0.1	1.5	0.04	1	1	0.08
Q$1905	Q9CZX9	EMC4_MOUSE	Emc4	ER membrane protein complex subunit 4	0.906	7.1	1	1186074	703866	1306529	1852943	245151	60916	144846	284562	46.2	19.4	24.8	34.3	-1.7	0.4	1.1	0.7	1.6	0.4	1.9	0.03	2.6	0.07	1.4	0.4	0.009
Q$462	E9PWY9	E9PWY9_MOUSE	Farsa	Phenylalanine--tRNA ligase alpha subunit	0.9997	10.65	3	1185375	831913	1170585	1839431	192631	77209	122720	149187	36.3	20.8	23.4	18.1	-1.4	0.2	-1	0.9	1.6	0.1	1.4	0.1	2.2	0.002	1.6	0.04	0.001
Q$1441	Q61102	ABCB7_MOUSE	Abcb7	ATP-binding cassette sub-family B member 7, mitochondrial	0.9047	1.86	1	1182177	966418	1242401	1268075	236455	162084	225439	95892	44.7	37.5	40.6	16.9	-1.2	0.9	1.1	1	1.1	1	1.3	0.9	1.3	0.6	1	1	0.7
Q$656	G3UXJ6	G3UXJ6_MOUSE	Syncrip	Heterogeneous nuclear ribonucleoprotein Q	1	16.07	5	1172237	842977	1359629	1801489	229006	126883	134682	133547	43.7	33.7	22.2	16.6	-1.4	0.4	1.2	0.5	1.5	0.2	1.6	0.1	2.1	0.005	1.3	0.2	0.006
Q$975	P21995	EMB_MOUSE	Emb	Embigin	1	6.97	2	1167709	959247	1111430	1410312	91838	52421	43840	145836	17.6	12.2	8.8	23.1	-1.2	0.3	-1.1	0.6	1.2	0.4	1.2	0.3	1.5	0.1	1.3	0.3	0.02
Q$1602	Q8BXK9	CLIC5_MOUSE	Clic5	Chloride intracellular channel protein 5	1	9.96	2	1164537	937150	1182539	1356795	125775	64645	42801	87209	24.2	15.4	8.1	14.4	-1.2	0.4	1	0.9	1.2	0.4	1.3	0.06	1.4	0.03	1.1	0.4	0.03
Q$470	E9PYG9	E9PYG9_MOUSE	Samhd1	Deoxynucleoside triphosphate triphosphohydrolase SAMHD1	1	8.59	3	1163452	858589	1156285	1221785	90393	32019	16530	85380	17.4	8.3	3.2	15.6	-1.4	0.05	-1	0.9	1.1	0.9	1.3	0.0002	1.4	0.02	1.1	0.9	0.005
Q$797	O55022	PGRC1_MOUSE	Pgrmc1	Membrane-associated progesterone receptor component 1	1	28.21	2	1158480	934032	1028188	1238949	87311	66693	66961	93510	16.9	16	14.6	16.9	-1.2	0.3	-1.1	0.6	1.1	0.6	1.1	0.6	1.3	0.2	1.2	0.4	0.07
Q$1791	Q99KH8	STK24_MOUSE	Stk24	Serine/threonine-protein kinase 24	1	12.53	3	1156885	767834	1174588	1311714	238420	102522	131686	97451	46.1	29.9	25.1	16.6	-1.5	0.5	1	0.9	1.1	0.8	1.5	0.2	1.7	0.03	1.1	0.8	0.1
Q$2091	Q9Z0P5-2	TWF2_MOUSE	Twf	Isoform 2 of Twinfilin-2	0.9986	15.27	3	1155121	974975	1113962	1367349	116790	37004	64555	79387	22.6	8.5	13	13	-1.2	0.4	-1	0.8	1.2	0.4	1.1	0.3	1.4	0.01	1.2	0.2	0.02
Q$732	J3QMG3	J3QMG3_MOUSE	Vdac3	Voltage-dependent anion-selective channel protein 3	1	22.18	4	1152207	994613	1082906	1274081	118045	76741	82697	90041	22.9	17.3	17.1	15.8	-1.2	0.8	-1.1	0.8	1.1	0.8	1.1	0.8	1.3	0.2	1.2	0.6	0.2
Q$1061	P40336-2	VP26A_MOUSE	Vps26	Isoform 2 of Vacuolar protein sorting-associated protein 26A	0.9825	3.62	1	1144490	833619	1272990	1574910	154532	55982	143939	321430	30.2	15	25.3	45.6	-1.4	0.3	1.1	0.7	1.4	0.6	1.5	0.1	1.9	0.3	1.2	0.7	0.1
Q$203	Q9CQI3	GMFB_MOUSE	Gmfb	Glia maturation factor beta	1	25.35	2	1141706	1021397	1240557	1603122	197777	154074	112505	184240	38.7	33.7	20.3	25.7	-1.1	0.9	1.1	0.9	1.4	0.5	1.2	0.6	1.6	0.2	1.3	0.5	0.1
Q$2061	Q9R1P3	PSB2_MOUSE	Psmb2	Proteasome subunit beta type-2	0.9986	17.91	2	1139554	873394	1353866	1648257	191309	117771	110810	138621	37.5	30.2	18.3	18.8	-1.3	0.5	1.2	0.5	1.4	0.2	1.6	0.09	1.9	0.02	1.2	0.4	0.01
Q$1023	P31230	AIMP1_MOUSE	Aimp1	Aminoacyl tRNA synthase complex-interacting multifunctional protein 1	0.9995	9.68	2	1138611	935093	1006908	1340824	136272	105757	66774	218046	26.8	25.3	14.8	36.4	-1.2	0.7	-1.1	0.8	1.2	0.8	1.1	0.8	1.4	0.6	1.3	0.7	0.2
Q$497	Q9CPV4-2	GLOD4_MOUSE	Glod	Isoform 2 of Glyoxalase domain-containing protein 4	1	16.49	4	1137866	730185	1097301	1398951	239133	67440	100414	109704	47	20.7	20.5	17.5	-1.6	0.4	-1	0.9	1.2	0.6	1.5	0.08	1.9	0.005	1.3	0.3	0.04
Q$145	B7ZCF1	B7ZCF1_MOUSE	Psmc3	26S protease regulatory subunit 6A	1	17.07	5	1137141	806252	1270489	1699015	188076	101643	126620	121970	37	28.2	22.3	16.1	-1.4	0.3	1.1	0.6	1.5	0.1	1.6	0.1	2.1	0.003	1.3	0.1	0.003
Q$1340	Q9R233-2	TPSN_MOUSE	Tapb	Isoform Short of Tapasin	1	20.46	6	1133775	1142376	1534601	4546497	129666	155086	191854	2333262	25.6	30.4	28	114.8	1	1	1.4	0.5	4	0.6	1.3	0.6	4	0.6	3	0.6	0.2
Q$812	O70503	DHB12_MOUSE	Hsd17b12	Estradiol 17-beta-dehydrogenase 12	0.9998	9.29	2	1133196	1174263	1273367	1407566	127284	87469	103708	122677	25.1	16.7	18.2	19.5	1	0.9	1.1	0.9	1.2	0.6	1.1	0.9	1.2	0.6	1.1	0.9	0.3
Q$1233	P63168	DYL1_MOUSE	Dynll1	Dynein light chain 1, cytoplasmic	0.9733	24.72	1	1126445	905777	1139951	1679299	179307	73402	123749	201697	35.6	18.1	24.3	26.9	-1.2	0.5	1	1	1.5	0.3	1.3	0.4	1.9	0.04	1.5	0.2	0.02
Q$594	F6X7C4	F6X7C4_MOUSE	Gm7866	Protein Gm7866	1	7.14	1	1125602	880345	1052791	1579025	172702	108152	118443	221687	34.3	27.5	25.2	31.4	-1.3	0.6	-1.1	0.7	1.4	0.5	1.2	0.6	1.8	0.1	1.5	0.3	0.04
Q$539	Q8VH51-2	RBM39_MOUSE	Rbm3	Isoform 2 of RNA-binding protein 39	1	15.65	6	1115846	781548	1076550	1390835	144275	80094	61258	92957	28.9	22.9	12.7	14.9	-1.4	0.2	-1	0.8	1.2	0.3	1.4	0.09	1.8	0.007	1.3	0.09	0.005
Q$79	A2BDX2	A2BDX2_MOUSE	Dpm1	Dolichol-phosphate mannosyltransferase	0.9998	17.31	2	1112326	808530	1274960	1708011	153862	102013	105656	173741	30.9	28.2	18.5	22.7	-1.4	0.3	1.1	0.4	1.5	0.1	1.6	0.06	2.1	0.01	1.3	0.2	0.002
Q$902	P11276	FINC_MOUSE	Fn1	Fibronectin	0.9798	0.57	1	1111519	652755	1380523	2346700	310166	109462	337473	656357	62.4	37.5	54.7	62.5	-1.7	0.5	1.2	0.6	2.1	0.4	2.1	0.3	3.6	0.3	1.7	0.5	0.05
Q$1671	Q8JZQ2	AFG32_MOUSE	Afg3l2	AFG3-like protein 2	0.9932	5.36	2	1111439	965275	1261225	1340131	83166	137834	70338	133977	16.7	31.9	12.5	22.4	-1.2	0.6	1.1	0.6	1.2	0.6	1.3	0.4	1.4	0.4	1.1	0.6	0.1
Q$754	O08686	BARX2_MOUSE	Barx2	Homeobox protein BarH-like 2	0.9864	19.79	1	1110372	886806	1150349	836233	143223	50979	27990	59208	28.8	12.9	5.4	15.8	-1.3	0.4	1	0.8	-1.3	0.4	1.3	0.01	-1.1	0.8	-1.4	0.008	0.04
Q$1873	Q9CSN1	SNW1_MOUSE	Snw1	SNW domain-containing protein 1	0.9996	4.66	1	1110272	839565	1232471	1403514	83837	90951	173828	152563	16.9	24.2	31.5	24.3	-1.3	0.3	1.1	0.7	1.3	0.3	1.5	0.3	1.7	0.08	1.1	0.7	0.05
Q$1587	Q8BFY6	PEF1_MOUSE	Pef1	Peflin	0.9251	4.73	1	1106138	979504	2284949	1845606	83636	88322	1010230	625962	16.9	20.2	98.9	75.8	-1.1	0.8	2.1	0.8	1.7	0.8	2.3	0.8	1.9	0.8	-1.2	0.8	0.4
Q$608	P57776-2	EF1D_MOUSE	Eef1	Isoform 2 of Elongation factor 1-delta	1	31.91	5	1104865	725654	1337931	1916852	275484	174658	176662	168401	55.8	53.8	29.5	19.6	-1.5	0.5	1.2	0.5	1.7	0.2	1.8	0.2	2.6	0.007	1.4	0.2	0.006
Q$1630	Q8BTI8-2	SRRM2_MOUSE	Srrm	Isoform 2 of Serine/arginine repetitive matrix protein 2	1	3.26	6	1098470	910951	1087007	1318617	178757	105881	119814	110702	36.4	26	24.6	18.8	-1.2	0.8	-1	1	1.2	0.8	1.2	0.8	1.4	0.2	1.2	0.7	0.2
Q$125	B1AWE0	B1AWE0_MOUSE	Clta	Clathrin light chain A	1	12.96	2	1093286	778086	1256073	1517163	295961	116315	218424	146077	60.5	33.4	38.9	21.5	-1.4	0.7	1.1	0.7	1.4	0.7	1.6	0.4	1.9	0.02	1.2	0.7	0.1
Q$1849	Q9CQF3	CPSF5_MOUSE	Nudt21	Cleavage and polyadenylation specificity factor subunit 5	0.9721	3.96	1	1093169	1242144	1167406	1640604	187112	218881	243792	332109	38.3	39.4	46.7	45.3	1.1	0.9	1.1	1	1.5	0.7	-1.1	1	1.3	0.8	1.4	0.8	0.4
Q$852	P04223-2	HA1K_MOUSE	H2-K	Isoform 2 of H-2 class I histocompatibility antigen, K-K alpha chain	1	11.94	3	1083064	962999	1126696	1241535	89314	100071	120185	101000	18.4	23.2	23.9	18.2	-1.1	0.8	1	0.8	1.1	0.8	1.2	0.8	1.3	0.4	1.1	0.8	0.3
Q$1675	Q8K023-2	AKC1H_MOUSE	Akr1c1	Isoform 2 of Aldo-keto reductase family 1 member C18	0.9668	3.7	1	1081920	913710	1188125	1184385	120940	99309	132619	136277	25	24.3	25	25.7	-1.2	0.8	1.1	0.9	1.1	0.9	1.3	0.6	1.3	0.6	-1	1	0.4
Q$853	P04919-2	B3AT_MOUSE	Slc4a	Isoform Kidney of Band 3 anion transport protein	1	3.53	3	1078933	955019	1154316	1413762	61741	72965	103893	165457	12.8	17.1	20.1	26.2	-1.1	0.5	1.1	0.6	1.3	0.4	1.2	0.5	1.5	0.2	1.2	0.5	0.05
Q$1706	Q8R404	QIL1_MOUSE	Qil1	Protein QIL1	0.9999	68.07	3	1076890	974242	1233680	1253039	67291	73876	67600	68649	14	17	12.3	12.3	-1.1	0.6	1.1	0.4	1.2	0.4	1.3	0.2	1.3	0.1	1	0.8	0.04
Q$1387	Q3UW66	Q3UW66_MOUSE	Mpst	3-mercaptopyruvate sulfurtransferase	1	16.84	3	1071976	892823	1092718	1352340	237173	122524	117801	211891	49.5	30.7	24.1	35	-1.2	0.8	1	0.9	1.3	0.8	1.2	0.8	1.5	0.5	1.2	0.8	0.4
Q$953	P17809	GTR1_MOUSE	Slc2a1	Solute carrier family 2, facilitated glucose transporter member 1	0.9777	2.03	1	1071714	813090	1351490	1547650	119607	63222	97748	222630	25	17.4	16.2	32.2	-1.3	0.3	1.3	0.3	1.4	0.3	1.7	0.01	1.9	0.1	1.1	0.4	0.01
Q$157	D3YTQ9	D3YTQ9_MOUSE	Rps15	40S ribosomal protein S15	1	38.98	2	1068520	1036929	1152342	1292587	60115	36967	134950	88183	12.6	8	26.2	15.3	-1	0.9	1.1	0.9	1.2	0.3	1.1	0.9	1.2	0.2	1.1	0.9	0.2
Q$1367	Q3U962	CO5A2_MOUSE	Col5a2	Collagen alpha-2(V) chain	0.9639	3.94	1	1067366	887159	1367131	1246644	241913	219173	273014	326349	50.7	55.2	44.7	58.5	-1.2	0.9	1.3	0.9	1.2	0.9	1.5	0.8	1.4	0.9	-1.1	0.9	0.6
Q$1934	Q9D2V7	CORO7_MOUSE	Coro7	Coronin-7	1	3.58	2	1066663	891559	925507	1134481	100904	87869	112749	41603	21.2	22	27.2	8.2	-1.2	0.6	-1.2	0.8	1.1	0.8	1	0.8	1.3	0.2	1.2	0.5	0.2
Q$531	E9Q6U4	E9Q6U4_MOUSE	Pfdn4	Protein Pfdn4	0.9002	11.54	1	1062270	795345	1037395	1375325	165248	75331	106985	117762	34.8	21.2	23.1	19.1	-1.3	0.4	-1	0.9	1.3	0.4	1.3	0.3	1.7	0.02	1.3	0.3	0.03
Q$239	P97496-2	SMRC1_MOUSE	Smarcc	Isoform 2 of SWI/SNF complex subunit SMARCC1	0.9755	1.77	1	1061156	1028250	837696	909484	96947	110611	67822	56872	20.4	24.1	18.1	14	-1	0.8	-1.3	0.5	-1.2	0.6	-1.2	0.6	-1.1	0.7	1.1	0.7	0.3
Q$1085	P47811-3	MK14_MOUSE	Mapk1	Isoform 3 of Mitogen-activated protein kinase 14	0.9994	3.06	1	1056080	931897	1676267	1654690	135023	140280	134682	139522	28.6	33.7	18	18.9	-1.1	0.8	1.6	0.05	1.6	0.05	1.8	0.03	1.8	0.03	-1	0.9	0.002
Q$994	P26043	RADI_MOUSE	Rdx	Radixin	1	2.23	1	1055992	916654	1202105	1331235	212939	191761	168979	154404	45.1	46.8	31.4	25.9	-1.2	0.9	1.1	0.9	1.3	0.8	1.3	0.8	1.5	0.6	1.1	0.9	0.4
Q$37	P26638	SYSC_MOUSE	Sars	Serine--tRNA ligase, cytoplasmic	0.9937	6.45	3	1054543	742080	1299765	1670142	191398	69110	153635	137459	40.6	20.8	26.4	18.4	-1.4	0.3	1.2	0.3	1.6	0.1	1.8	0.05	2.3	0.002	1.3	0.3	0.003
Q$1638	Q8BWY3	ERF1_MOUSE	Etf1	Eukaryotic peptide chain release factor subunit 1	0.981	2.97	1	1053781	818734	1015064	1190386	123435	77301	107137	147620	26.2	21.1	23.6	27.7	-1.3	0.5	-1	0.8	1.1	0.7	1.2	0.5	1.5	0.3	1.2	0.7	0.2
Q$1620	Q8BMD8	SCMC1_MOUSE	Slc25a24	Calcium-binding mitochondrial carrier protein SCaMC-1	0.9901	7.16	2	1052024	656336	1298330	1460608	216116	83084	210686	138882	45.9	28.3	36.3	21.3	-1.6	0.4	1.2	0.7	1.4	0.4	2	0.1	2.2	0.007	1.1	0.7	0.02
Q$540	E9Q8S8	E9Q8S8_MOUSE	Hk3	Hexokinase-3	1	5.25	3	1051300	1000860	1387394	1100838	140181	219137	178261	87435	29.8	49	28.7	17.8	-1.1	1	1.3	0.7	1	1	1.4	0.7	1.1	1	-1.3	0.7	0.4
Q$1794	Q99KJ8	DCTN2_MOUSE	Dctn2	Dynactin subunit 2	0.9977	3.98	1	1046222	909808	954673	1022225	84425	65081	60631	51333	18	16	14.2	11.2	-1.1	0.8	-1.1	0.9	-1	0.9	1	0.9	1.1	0.8	1.1	0.9	0.5
Q$674	G3UZY2	G3UZY2_MOUSE	Txn2	Thioredoxin (Fragment)	0.9919	30	2	1039872	1024921	1096368	1180644	101551	128896	78908	77219	21.8	28.1	16.1	14.6	-1	1	1.1	1	1.1	0.9	1.1	1	1.2	0.9	1.1	0.9	0.7
Q$265	D3Z629	D3Z629_MOUSE	Rpl9	60S ribosomal protein L9	1	39.76	6	1038555	787986	1111168	1405492	135543	106325	107710	120552	29.2	30.2	21.7	19.2	-1.3	0.3	1.1	0.7	1.4	0.3	1.4	0.3	1.8	0.03	1.3	0.3	0.02
Q$1713	Q8VC49	IF27B_MOUSE	Ifi27l2b	Interferon alpha-inducible protein 27-like protein 2B	0.9234	19.79	1	1036174	920531	967661	1012303	91719	111615	128995	72303	19.8	27.1	29.8	16	-1.1	1	-1.1	1	-1	1	1.1	1	1.1	1	1	1	0.9
Q$1453	Q61578	ADRO_MOUSE	Fdxr	NADPH:adrenodoxin oxidoreductase, mitochondrial	0.9001	2.83	1	1032698	781149	983171	1546905	287183	156377	141490	294479	62.2	44.8	32.2	42.6	-1.3	0.7	-1.1	0.9	1.5	0.7	1.3	0.7	2	0.3	1.6	0.5	0.2
Q$1745	Q91X78	ERLN1_MOUSE	Erlin1	Erlin-1	0.9999	6.94	2	1030442	877480	1112007	2981265	195147	110731	176142	949823	42.3	28.2	35.4	71.2	-1.2	0.8	1.1	0.8	2.9	0.4	1.3	0.6	3.4	0.4	2.7	0.4	0.03
Q$1364	Q3U6K9	Q3U6K9_MOUSE	Psat1	Phosphoserine aminotransferase	0.9999	6.54	2	1028352	775540	792447	1136113	127498	62060	88939	217747	27.7	17.9	25.1	42.9	-1.3	0.5	-1.3	0.6	1.1	0.9	1	0.9	1.5	0.6	1.4	0.6	0.2
Q$1260	P70390-2	SHOX2_MOUSE	Shox	Isoform 2 of Short stature homeobox protein 2	0.9879	12.85	2	1025952	787432	939823	1198489	92854	58880	70212	98637	20.2	16.7	16.7	18.4	-1.3	0.3	-1.1	0.5	1.2	0.4	1.2	0.4	1.5	0.04	1.3	0.3	0.02
Q$280	D3Z7P4	D3Z7P4_MOUSE	Gls	Glutaminase kidney isoform, mitochondrial	0.9995	6.52	2	1024848	818346	1378243	1491346	175852	147106	149315	201895	38.4	40.2	24.2	30.3	-1.3	0.6	1.3	0.4	1.5	0.4	1.7	0.2	1.8	0.2	1.1	0.7	0.05
Q$105	B0R1E3	B0R1E3_MOUSE	Hint1	Histidine triad nucleotide-binding protein 1	1	16.81	1	1023669	564629	1195725	1952755	239925	60623	91800	200186	52.4	24	17.2	22.9	-1.8	0.2	1.2	0.5	1.9	0.05	2.1	0.003	3.5	0.007	1.6	0.03	0.0002
Q$1337	Q3B7Z2	OSBP1_MOUSE	Osbp	Oxysterol-binding protein 1	0.9708	9.94	2	1016106	769438	1114332	2192628	156564	186698	151647	890201	34.5	54.3	30.4	90.8	-1.3	0.7	1.1	0.7	2.2	0.7	1.4	0.7	2.8	0.7	2	0.7	0.2
Q$842	P02463	CO4A1_MOUSE	Col4a1	Collagen alpha-1(IV) chain	0.9569	2.82	1	1012222	1022613	1700350	1917050	173462	140482	218874	199638	38.3	30.7	28.8	23.3	1	1	1.7	0.1	1.9	0.04	1.7	0.1	1.9	0.04	1.1	0.7	0.005
Q$534	E9Q7G0	E9Q7G0_MOUSE	Numa1	Protein Numa1	0.997	1.05	2	1012139	600731	1148050	1595123	282715	142352	138602	282079	62.5	53	27	39.5	-1.7	0.6	1.1	0.7	1.6	0.6	1.9	0.1	2.7	0.08	1.4	0.6	0.04
Q$22	A2ABZ2	A2ABZ2_MOUSE	Pycr1	Pyrroline-5-carboxylate reductase 1, mitochondrial (Fragment)	1	8.82	2	1007285	929345	1081371	1183920	86955	97510	97390	104839	19.3	23.5	20.1	19.8	-1.1	0.9	1.1	0.9	1.2	0.7	1.2	0.8	1.3	0.5	1.1	0.9	0.3
Q$779	O35350	CAN1_MOUSE	Capn1	Calpain-1 catalytic subunit	0.9997	1.68	1	1006958	636606	998294	1315503	249930	111326	123562	93666	55.5	39.1	27.7	15.9	-1.6	0.5	-1	1	1.3	0.5	1.6	0.3	2.1	0.01	1.3	0.3	0.06
Q$1541	Q6RHW0	K1C9_MOUSE	Krt9	Keratin, type I cytoskeletal 9	0.978	12.38	2	1005868	855774	1223540	1267913	82165	52032	89921	89650	18.3	13.6	16.4	15.8	-1.2	0.3	1.2	0.3	1.3	0.2	1.4	0.04	1.5	0.02	1	0.7	0.007
Q$2084	Q9WVA3	BUB3_MOUSE	Bub3	Mitotic checkpoint protein BUB3	1	12.27	3	1000660	786304	971645	1181501	188892	81229	65053	77315	42.2	23.1	15	14.6	-1.3	0.7	-1	0.9	1.2	0.7	1.2	0.4	1.5	0.05	1.2	0.3	0.2
Q$528	E9Q6F4	E9Q6F4_MOUSE	Npepps	Puromycin-sensitive aminopeptidase	1	13.06	4	999343	619529	1135559	1202399	145913	60277	60077	73178	32.6	21.8	11.8	13.6	-1.6	0.2	1.1	0.7	1.2	0.6	1.8	0.002	1.9	0.002	1.1	0.7	0.002
Q$1077	P46471	PRS7_MOUSE	Psmc2	26S protease regulatory subunit 7	1	12.93	4	996421	805071	1072036	1491029	140638	82784	143977	189707	31.6	23	30	28.5	-1.2	0.5	1.1	0.7	1.5	0.3	1.3	0.4	1.9	0.06	1.4	0.4	0.03
Q$647	G3UWM1	G3UWM1_MOUSE	Syncrip	Heterogeneous nuclear ribonucleoprotein Q (Fragment)	1	31.12	4	994308	697064	1179494	1603209	221613	126790	132970	137420	49.8	40.7	25.2	19.2	-1.4	0.5	1.2	0.5	1.6	0.2	1.7	0.1	2.3	0.008	1.4	0.2	0.008
Q$64	A2ARI0	A2ARI0_MOUSE	Tmx4	Thioredoxin-related transmembrane protein 4	0.9864	7.1	1	993365	803737	842152	671604	50684	99457	73972	74498	11.4	27.7	19.6	24.8	-1.2	0.5	-1.2	0.5	-1.5	0.04	1	0.8	-1.2	0.5	-1.3	0.5	0.06
Q$761	O08915	AIP_MOUSE	Aip	AH receptor-interacting protein	0.927	4.24	1	989921	998754	846356	1111283	126735	47160	70997	117513	28.6	10.6	18.8	23.6	1	0.9	-1.2	0.8	1.1	0.8	-1.2	0.4	1.1	0.8	1.3	0.4	0.3
Q$1936	Q9D3P8	PLRKT_MOUSE	Plgrkt	Plasminogen receptor (KT)	0.9813	6.8	1	989868	879526	928030	1114161	72810	39862	47179	30658	16.4	10.1	11.4	6.2	-1.1	0.5	-1.1	0.7	1.1	0.5	1.1	0.7	1.3	0.01	1.2	0.05	0.02
Q$659	G3UXY0	G3UXY0_MOUSE	Psme1	Proteasome activator complex subunit 1	1	11.95	2	989580	814850	779619	1040330	223630	167210	146876	214221	50.5	45.9	42.1	46	-1.2	0.9	-1.3	0.9	1.1	1	-1	1	1.3	0.9	1.3	0.9	0.7
Q$278	D3Z7E5	D3Z7E5_MOUSE	Gsk3a	Glycogen synthase kinase-3 alpha	0.9116	15.43	1	988175	953606	2410165	2255885	105081	127655	1270553	1125665	23.8	29.9	117.9	111.6	-1	1	2.4	0.9	2.3	0.9	2.5	0.9	2.4	0.9	-1.1	1	0.5
Q$1900	Q9CZD3	SYG_MOUSE	Gars	Glycine--tRNA ligase	1	5.08	2	984149	820463	916201	1018086	130577	114310	136458	120299	29.7	31.2	33.3	26.4	-1.2	0.9	-1.1	1	1	1	1.1	1	1.2	0.8	1.1	1	0.7
Q$1879	Q9CWK8	SNX2_MOUSE	Snx2	Sorting nexin-2	0.9564	2.7	1	983062	478321	1177891	1289350	348941	85838	212655	179774	79.4	40.1	40.4	31.2	-2.1	0.6	1.2	0.9	1.3	0.8	2.5	0.08	2.7	0.02	1.1	0.9	0.1
Q$465	Q05CX5	Q05CX5_MOUSE	Luc7l2	Luc7l2 protein	0.9996	16.81	4	982361	617490	1009593	1465025	278957	141014	188899	187907	63.5	51.1	41.8	28.7	-1.6	0.5	1	0.9	1.5	0.5	1.6	0.5	2.4	0.04	1.5	0.5	0.07
Q$1828	Q9CPP0	NPM3_MOUSE	Npm3	Nucleoplasmin-3	0.9902	12	1	982340	757871	1566503	1911100	246362	153667	330037	224478	56.1	45.3	47.1	26.3	-1.3	0.7	1.6	0.5	1.9	0.1	2.1	0.2	2.5	0.02	1.2	0.7	0.02
Q$1210	P62869	ELOB_MOUSE	Tceb2	Transcription elongation factor B polypeptide 2	0.9581	21.19	1	981814	872765	917514	1013530	86093	42216	69554	96191	19.6	10.8	17	21.2	-1.1	0.8	-1.1	0.9	1	0.9	1.1	0.9	1.2	0.8	1.1	0.9	0.6
Q$1536	Q6PE01	SNR40_MOUSE	Snrnp40	U5 small nuclear ribonucleoprotein 40 kDa protein	1	8.66	1	978086	826434	875065	1053238	73158	32813	51722	74113	16.7	8.9	13.2	15.7	-1.2	0.4	-1.1	0.6	1.1	0.7	1.1	0.7	1.3	0.1	1.2	0.4	0.07
Q$713	H3BKP1	H3BKP1_MOUSE	Hmox1	Heme oxygenase 1 (Fragment)	1	15.82	2	977528	941876	1008961	1066402	100032	64907	85145	64707	22.9	15.4	18.9	13.6	-1	1	1	1	1.1	1	1.1	1	1.1	0.8	1.1	1	0.7
Q$32	Q9WV02-2	RBMX_MOUSE	Rbm	Isoform 2 of RNA-binding motif protein, X chromosome	1	17.65	4	974281	758046	1182432	1315985	184969	120583	108012	94390	42.5	35.6	20.4	16	-1.3	0.7	1.2	0.7	1.4	0.4	1.6	0.1	1.7	0.04	1.1	0.7	0.04
Q$1562	Q7TMF3	NDUAC_MOUSE	Ndufa12	NADH dehydrogenase [ubiquinone] 1 alpha subcomplex subunit 12	0.9999	20.69	2	972590	624102	969637	1672247	319528	143391	166010	536145	73.5	51.4	38.3	71.7	-1.6	0.7	-1	1	1.7	0.7	1.6	0.6	2.7	0.5	1.7	0.7	0.2
Q$148	B7ZD61	B7ZD61_MOUSE	Rbm39	RNA-binding protein 39 (Fragment)	1	23.81	5	972589	657972	952185	1237511	125291	66869	53331	88695	28.8	22.7	12.5	16	-1.5	0.2	-1	0.9	1.3	0.2	1.4	0.04	1.9	0.005	1.3	0.1	0.003
Q$216	D3YZJ1	D3YZJ1_MOUSE	Sqstm1	Sequestosome-1	1	12.3	3	965182	820176	779869	870539	110714	76010	48362	127093	25.6	20.7	13.9	32.6	-1.2	0.8	-1.2	0.7	-1.1	0.9	-1.1	0.9	1.1	0.9	1.1	0.9	0.6
Q$1766	Q922J9-2	FACR1_MOUSE	Far	Isoform 2 of Fatty acyl-CoA reductase 1	1	14.62	3	960912	941383	1068553	1046295	76799	46512	85878	121130	17.9	11	18	25.9	-1	1	1.1	0.9	1.1	0.9	1.1	0.8	1.1	0.9	-1	1	0.7
Q$514	E9Q3Z4	E9Q3Z4_MOUSE	Hk3	Hexokinase-3	1	3.11	2	960826	927365	1295883	1001211	129145	214610	175995	80244	30.1	51.7	30.4	17.9	-1	1	1.3	0.7	1	1	1.4	0.7	1.1	1	-1.3	0.7	0.4
Q$139	B7FAU6	B7FAU6_MOUSE	Rpl10	60S ribosomal protein L10 (Fragment)	1	17.37	3	959949	814286	898009	1408146	217348	186763	59894	119647	50.6	51.3	14.9	19	-1.2	0.9	-1.1	0.9	1.5	0.4	1.1	0.9	1.7	0.1	1.6	0.03	0.07
Q$1037	P35174-2	CYT2_MOUSE	Stfa	Isoform 2 of Stefin-2	1	37.86	2	956812	515024	749017	1087032	191516	57436	96510	59410	44.8	24.9	28.8	12.2	-1.9	0.3	-1.3	0.6	1.1	0.6	1.5	0.3	2.1	0.0007	1.5	0.08	0.01
Q$1880	Q9CWW6	PIN4_MOUSE	Pin4	Peptidyl-prolyl cis-trans isomerase NIMA-interacting 4	0.9968	22.9	1	955787	968113	1389020	1570992	102888	159990	43822	131552	24.1	37	7.1	18.7	1	0.9	1.5	0.03	1.6	0.03	1.4	0.2	1.6	0.08	1.1	0.4	0.003
Q$999	P26618	PGFRA_MOUSE	Pdgfra	Platelet-derived growth factor receptor alpha	0.9691	0.73	1	954412	563428	1060708	1480663	339750	125845	305458	234655	79.6	49.9	64.4	35.4	-1.7	0.7	1.1	0.8	1.6	0.7	1.9	0.6	2.6	0.05	1.4	0.7	0.1
Q$1744	Q91WS0	CISD1_MOUSE	Cisd1	CDGSH iron-sulfur domain-containing protein 1	0.9889	12.04	1	952702	703966	1095330	1029753	192063	115841	299638	441616	45.1	36.8	61.2	95.9	-1.4	0.8	1.1	1	1.1	1	1.6	0.8	1.5	0.9	-1.1	1	0.8
Q$437	E9QJZ1	E9QJZ1_MOUSE	Gm16381	Protein Gm16381	0.9982	12.33	1	949058	711180	1132838	1318423	150426	89725	116639	110488	35.4	28.2	23	18.7	-1.3	0.5	1.2	0.5	1.4	0.3	1.6	0.1	1.9	0.02	1.2	0.5	0.01
Q$1025	P31324	KAP3_MOUSE	Prkar2b	cAMP-dependent protein kinase type II-beta regulatory subunit	1	4.09	1	948803	761572	844355	913585	103250	24089	72247	42788	24.3	7.1	19.1	10.5	-1.2	0.5	-1.1	0.8	-1	0.8	1.1	0.8	1.2	0.09	1.1	0.8	0.3
Q$1632	Q8BU14	SEC62_MOUSE	Sec62	Translocation protein SEC62	0.9929	5.28	2	948487	791426	758197	1029548	112608	104631	68744	116892	26.5	29.6	20.3	25.4	-1.2	0.7	-1.3	0.6	1.1	0.9	-1	0.9	1.3	0.6	1.4	0.4	0.2
Q$1146	Q9JKB1	UCHL3_MOUSE	Uchl3	Ubiquitin carboxyl-terminal hydrolase isozyme L3	1	12.61	2	941819	624603	1108706	1379361	229248	98490	91464	115286	54.4	35.3	18.4	18.7	-1.5	0.4	1.2	0.5	1.5	0.4	1.8	0.03	2.2	0.006	1.2	0.4	0.01
Q$976	Q544X6	Q544X6_MOUSE	Fech	Ferrochelatase	1	12.32	3	940084	800923	1089380	1180735	109277	127726	133595	95526	26	35.7	27.4	18.1	-1.2	0.8	1.2	0.8	1.3	0.5	1.4	0.5	1.5	0.2	1.1	0.8	0.2
Q$162	D3YU17	D3YU17_MOUSE	Ncln	Nicalin	0.9862	3.74	1	936105	695174	783012	979567	70201	108200	88366	163338	16.8	34.8	25.2	37.3	-1.3	0.5	-1.2	0.6	1	0.8	1.1	0.8	1.4	0.6	1.3	0.7	0.3
Q$780	O35405	PLD3_MOUSE	Pld3	Phospholipase D3	0.9988	6.15	2	935432	734275	918738	1088131	117236	71879	62667	138648	28	21.9	15.3	28.5	-1.3	0.6	-1	0.9	1.2	0.7	1.3	0.4	1.5	0.3	1.2	0.7	0.2
Q$1397	Q569Z6	TR150_MOUSE	Thrap3	Thyroid hormone receptor-associated protein 3	1	4.73	3	934747	750677	948224	1277225	107344	72995	83252	80065	25.7	21.7	19.6	14	-1.2	0.4	1	0.9	1.4	0.1	1.3	0.3	1.7	0.008	1.3	0.1	0.005
Q$1120	P52875	TM165_MOUSE	Tmem165	Transmembrane protein 165	0.9959	13.31	2	934267	872843	871180	1120139	95306	103229	62143	61683	22.8	26.4	16	12.3	-1.1	0.9	-1.1	0.9	1.2	0.5	-1	1	1.3	0.3	1.3	0.1	0.2
Q$1627	Q8BRF7-2	SCFD1_MOUSE	Scfd	Isoform 2 of Sec1 family domain-containing protein 1	0.9966	11.54	2	933092	537122	842968	1112268	196616	60726	89776	125881	47.1	25.3	23.8	25.3	-1.7	0.4	-1.1	0.7	1.2	0.7	1.6	0.1	2.1	0.02	1.3	0.4	0.04
Q$1599	Q8BH78	Q8BH78_MOUSE	Rtn4	Reticulon	1	13.2	2	930943	596342	1083689	1266308	244240	139317	170070	133889	58.7	52.2	35.1	23.6	-1.6	0.7	1.2	0.7	1.4	0.7	1.8	0.3	2.1	0.05	1.2	0.7	0.09
Q$1020	P30204-2	MSRE_MOUSE	Msr	Isoform II of Macrophage scavenger receptor types I and II	0.999	12.15	2	928851	1248876	1495739	1157903	195020	559468	865375	200116	46.9	100.2	129.4	38.6	1.3	1	1.6	1	1.2	1	1.2	1	-1.1	1	-1.3	1	0.9
Q$680	Q9JJW6-2	ALRF2_MOUSE	Alyref	Isoform 2 of Aly/REF export factor 2	1	17.51	2	927080	844345	947602	1202630	153787	127265	129985	182251	37.1	33.7	30.7	33.9	-1.1	0.9	1	0.9	1.3	0.8	1.1	0.9	1.4	0.6	1.3	0.8	0.4
Q$1158	P61021	RAB5B_MOUSE	Rab5b	Ras-related protein Rab-5B	1	6.51	1	923401	728775	1085612	1101309	210895	131811	82407	116014	51.1	40.4	17	23.6	-1.3	0.9	1.2	0.9	1.2	0.9	1.5	0.3	1.5	0.3	1	0.9	0.3
Q$1606	Q8BIG7	CMTD1_MOUSE	Comtd1	Catechol O-methyltransferase domain-containing protein 1	1	20.61	4	922274	776885	937876	959538	64297	43348	63590	40457	15.6	12.5	15.2	9.4	-1.2	0.3	1	1	1	1	1.2	0.3	1.2	0.09	1	1	0.1
Q$555	Q8BZ98-2	DYN3_MOUSE	Dnm	Isoform 2 of Dynamin-3	0.9942	0.93	1	914407	743973	1148763	1182293	148024	91074	184431	149914	36.2	27.4	35.9	28.4	-1.2	0.7	1.3	0.7	1.3	0.7	1.5	0.4	1.6	0.2	1	0.9	0.2
Q$558	Q922K7	NOP2_MOUSE	Nop2	Putative ribosomal RNA methyltransferase NOP2	0.9982	1.13	1	913913	812486	811431	985565	236344	198498	181957	110565	57.8	54.6	50.1	25.1	-1.1	1	-1.1	1	1.1	1	-1	1	1.2	1	1.2	1	0.9
Q$1474	Q62087	PON3_MOUSE	Pon3	Serum paraoxonase/lactonase 3	0.9704	4.52	1	912725	800213	858525	991218	76871	46331	65369	62099	18.8	12.9	17	14	-1.1	0.7	-1.1	0.8	1.1	0.8	1.1	0.8	1.2	0.2	1.2	0.6	0.2
Q$2115	Q9Z329-3	ITPR2_MOUSE	Itpr	Isoform 3 of Inositol 1,4,5-trisphosphate receptor type 2	0.9379	1.65	1	911006	526664	310391	847475	372542	152259	24190	341950	91.4	64.6	17.4	90.2	-1.7	0.7	-2.9	0.7	-1.1	0.9	-1.7	0.7	1.6	0.7	2.7	0.7	0.4
Q$4	A2A4X6	A2A4X6_MOUSE	Gm12355	MCG21910	1	12.88	2	907297	795499	798293	892075	71193	43296	50430	33459	17.5	12.2	14.1	8.4	-1.1	0.6	-1.1	0.6	-1	1	1	1	1.1	0.5	1.1	0.6	0.3
Q$1396	Q9D358-2	PPAC_MOUSE	Acp	Isoform 2 of Low molecular weight phosphotyrosine protein phosphatase	0.9996	14.56	2	899804	657507	916419	1301177	196424	114163	138793	115374	48.8	38.8	33.9	19.8	-1.4	0.5	1	0.9	1.4	0.4	1.4	0.5	2	0.02	1.4	0.3	0.04
Q$1285	P97315	CSRP1_MOUSE	Csrp1	Cysteine and glycine-rich protein 1	0.9766	7.77	1	897709	904175	1041458	1078234	97704	42783	86830	86952	24.3	10.6	18.6	18	1	1	1.2	0.7	1.2	0.7	1.2	0.7	1.2	0.5	1	0.9	0.3
Q$2007	Q9ESY9	GILT_MOUSE	Ifi30	Gamma-interferon-inducible lysosomal thiol reductase	0.9749	5.24	1	894592	742831	771848	1077429	92395	34032	70532	81936	23.1	10.2	20.4	17	-1.2	0.5	-1.2	0.5	1.2	0.5	1	0.7	1.5	0.03	1.4	0.1	0.02
Q$134	Q63886	UD11_MOUSE	Ugt1a1	UDP-glucuronosyltransferase 1-1	1	9.35	3	892971	757685	995076	1148821	122015	63831	69792	14434	30.6	18.8	15.7	2.8	-1.2	0.6	1.1	0.6	1.3	0.3	1.3	0.2	1.5	0.02	1.2	0.3	0.02
Q$1435	Q61035	SYHC_MOUSE	Hars	Histidine--tRNA ligase, cytoplasmic	1	5.89	2	891462	767562	1191064	2042353	127096	83746	86608	242659	31.9	24.4	16.3	26.6	-1.2	0.4	1.3	0.2	2.3	0.01	1.6	0.03	2.7	0.007	1.7	0.03	7e-05
Q$1528	Q6P3Z8	Q6P3Z8_MOUSE	Kat2a	Histone acetyltransferase KAT2A	0.9941	7.72	2	890909	1010163	1098243	824773	75100	72850	102628	97167	18.8	16.1	20.9	26.3	1.1	0.6	1.2	0.5	-1.1	0.8	1.1	0.8	-1.2	0.5	-1.3	0.4	0.2
Q$726	Q8VDM4	PSMD2_MOUSE	Psmd2	26S proteasome non-ATPase regulatory subunit 2	1	1.65	2	889801	653856	1050441	1442711	175660	88646	107668	121248	44.1	30.3	22.9	18.8	-1.4	0.5	1.2	0.5	1.6	0.1	1.6	0.1	2.2	0.005	1.4	0.1	0.004
Q$1708	Q8R5J9	PRAF3_MOUSE	Arl6ip5	PRA1 family protein 3	1	16.49	2	889752	718883	981952	1280848	105732	40596	95550	124394	26.6	12.6	21.8	21.7	-1.2	0.3	1.1	0.5	1.4	0.2	1.4	0.2	1.8	0.02	1.3	0.3	0.006
Q$1718	Q8VDL4-3	ADPGK_MOUSE	Adpg	Isoform 3 of ADP-dependent glucokinase	1	15.56	4	883829	726048	772878	879402	85261	28048	55740	93510	21.6	8.6	16.1	23.8	-1.2	0.5	-1.1	0.8	-1	1	1.1	0.8	1.2	0.6	1.1	0.8	0.3
Q$90	D3Z5M2	D3Z5M2_MOUSE	Gm10110	Protein Gm10110	1	9.11	6	882877	763717	860954	1238356	115001	75135	71638	243904	29.1	22	18.6	44	-1.2	0.8	-1	0.9	1.4	0.7	1.1	0.8	1.6	0.6	1.4	0.7	0.1
Q$1605	Q8BHZ0	FA49A_MOUSE	Fam49a	Protein FAM49A	0.9733	4.02	1	882768	519832	973645	1117115	164159	68326	117382	91831	41.6	29.4	27	18.4	-1.7	0.3	1.1	0.7	1.3	0.6	1.9	0.05	2.1	0.005	1.1	0.6	0.01
Q$1000	P26883	FKB1A_MOUSE	Fkbp1a	Peptidyl-prolyl cis-trans isomerase FKBP1A	1	43.52	3	876195	710865	870294	1117461	104904	51197	93722	92099	26.8	16.1	24.1	18.4	-1.2	0.4	-1	1	1.3	0.4	1.2	0.4	1.6	0.03	1.3	0.4	0.04
Q$1607	Q8BIQ5-2	CSTF2_MOUSE	Cstf	Isoform 2 of Cleavage stimulation factor subunit 2	1	17.06	3	874984	709980	4015808	4277699	184937	123947	3275174	2791934	47.3	39	182.4	145.9	-1.2	0.8	4.6	0.8	4.9	0.8	5.7	0.8	6	0.8	1.1	1	0.5
Q$1027	P31938	MP2K1_MOUSE	Map2k1	Dual specificity mitogen-activated protein kinase kinase 1	0.9976	3.05	1	870199	560342	783097	1501644	341127	214428	297234	317932	87.7	85.6	84.9	47.3	-1.6	0.8	-1.1	0.9	1.7	0.6	1.4	0.8	2.7	0.2	1.9	0.5	0.2
Q$1716	Q8VDJ3	VIGLN_MOUSE	Hdlbp	Vigilin	0.9988	1.66	1	865326	647940	826237	1270244	160860	91120	83467	135649	41.6	31.4	22.6	23.9	-1.3	0.5	-1	0.8	1.5	0.3	1.3	0.5	2	0.03	1.5	0.1	0.02
Q$762	Q3TMX0	Q3TMX0_MOUSE	Sdcbp	MCG4375, isoform CRA_b	0.9882	11.07	2	858474	715825	976833	1252790	38621	80192	94713	106841	10.1	25.1	21.7	19.1	-1.2	0.3	1.1	0.3	1.5	0.04	1.4	0.2	1.8	0.02	1.3	0.2	0.003
Q$83	A2BH40-3	ARI1A_MOUSE	Arid1	Isoform 3 of AT-rich interactive domain-containing protein 1A	1	1.45	1	857907	676340	910513	990520	87662	51544	127133	112747	22.8	17	31.2	25.5	-1.3	0.4	1.1	0.9	1.2	0.8	1.3	0.4	1.5	0.2	1.1	0.9	0.2
Q$472	E9PYI8	E9PYI8_MOUSE	Usp14	Ubiquitin carboxyl-terminal hydrolase	1	11.57	3	854758	729444	851681	1004816	94145	43035	99432	57553	24.6	13.2	26.1	12.8	-1.2	0.7	-1	1	1.2	0.7	1.2	0.7	1.4	0.03	1.2	0.7	0.1
Q$16	A2A813	A2A813_MOUSE	Park7	Protein DJ-1	1	17.14	3	853984	526799	1102494	1262006	234318	118655	188441	118334	61.4	50.4	38.2	21	-1.6	0.6	1.3	0.7	1.5	0.5	2.1	0.2	2.4	0.01	1.1	0.7	0.04
Q$1695	Q8R016	BLMH_MOUSE	Blmh	Bleomycin hydrolase	0.9991	4.4	1	852842	673940	870060	809011	88212	92514	119386	146669	23.1	30.7	30.7	40.5	-1.3	0.7	1	1	-1.1	1	1.3	0.7	1.2	0.9	-1.1	1	0.6
Q$94	P16546-2	SPTN1_MOUSE	Sptan	Isoform 2 of Spectrin alpha chain, non-erythrocytic 1	1	3.1	4	849208	643683	1016337	1292903	171940	87277	195243	125870	45.3	30.3	43	21.8	-1.3	0.6	1.2	0.6	1.5	0.3	1.6	0.4	2	0.02	1.3	0.6	0.05
Q$1484	Q62376	RU17_MOUSE	Snrnp70	U1 small nuclear ribonucleoprotein 70 kDa	0.9999	5.8	2	845496	684205	986833	1098590	149798	106266	95537	100336	39.6	34.7	21.6	20.4	-1.2	0.8	1.2	0.8	1.3	0.6	1.4	0.3	1.6	0.1	1.1	0.8	0.1
Q$1278	P84091	AP2M1_MOUSE	Ap2m1	AP-2 complex subunit mu	1	8.51	3	843423	698872	751355	909983	162540	97697	108075	78615	43.1	31.3	32.2	19.3	-1.2	0.9	-1.1	1	1.1	1	1.1	1	1.3	0.6	1.2	0.8	0.6
Q$2057	Q9R112	SQRD_MOUSE	Sqrdl	Sulfide:quinone oxidoreductase, mitochondrial	1	8.89	3	842847	737807	886985	1036050	149529	84457	149172	134637	39.7	25.6	37.6	29.1	-1.1	0.9	1.1	0.9	1.2	0.9	1.2	0.9	1.4	0.5	1.2	0.9	0.5
Q$924	P14576	SRP54_MOUSE	Srp54	Signal recognition particle 54 kDa protein	0.909	2.18	1	838429	1019825	1553654	2054258	99860	170113	456736	599429	26.6	37.3	65.7	65.2	1.2	0.7	1.9	0.6	2.5	0.5	1.5	0.7	2	0.6	1.3	0.7	0.2
Q$1774	Q923L7	Q923L7_MOUSE	Ear6	Ear6 protein	1	20.65	3	838327	700220	818590	1101388	60885	51554	39501	111553	16.2	16.5	10.8	22.6	-1.2	0.3	-1	0.8	1.3	0.3	1.2	0.3	1.6	0.07	1.3	0.2	0.008
Q$189	D3YX27	D3YX27_MOUSE	Htra2	Serine protease HTRA2, mitochondrial	0.9989	10.33	2	832863	564915	1021351	1206848	171304	127234	113753	49061	46	50.4	24.9	9.1	-1.5	0.4	1.2	0.4	1.4	0.3	1.8	0.1	2.1	0.009	1.2	0.4	0.01
Q$1297	P97452	BOP1_MOUSE	Bop1	Ribosome biogenesis protein BOP1	0.9076	3.55	1	830941	1098829	907491	1466459	100584	418177	148045	176726	27.1	85.1	36.5	26.9	1.3	0.9	1.1	0.9	1.8	0.08	-1.2	0.9	1.3	0.9	1.6	0.2	0.3
Q$716	H3BLF7	H3BLF7_MOUSE	Gnb1	Guanine nucleotide-binding protein G(I)/G(S)/G(T) subunit beta-1 (Fragment)	1	27.78	2	829309	611484	844742	1037124	141283	61344	86471	99390	38.1	22.4	22.9	21.4	-1.4	0.6	1	0.9	1.3	0.6	1.4	0.3	1.7	0.04	1.2	0.6	0.06
Q$565	F6QJN8	F6QJN8_MOUSE	Capzb	F-actin-capping protein subunit beta (Fragment)	1	40.91	2	822619	576049	940760	1113792	162435	82082	83152	70803	44.2	31.9	19.8	14.2	-1.4	0.5	1.1	0.5	1.4	0.5	1.6	0.07	1.9	0.007	1.2	0.5	0.02
Q$1540	Q6PZE0	MUC19_MOUSE	Muc19	Mucin-19	0.9655	0.81	1	820545	693871	1152035	913457	90031	25685	217480	68069	24.5	8.3	42.2	16.7	-1.2	0.6	1.4	0.6	1.1	0.6	1.7	0.4	1.3	0.1	-1.3	0.6	0.1
Q$1001	P26954	IL3B2_MOUSE	Csf2rb2	Interleukin-3 receptor class 2 subunit beta	0.9996	1.94	1	819725	770187	1419316	1869090	145707	96686	178550	375352	39.7	28.1	28.1	44.9	-1.1	0.8	1.7	0.1	2.3	0.1	1.8	0.07	2.4	0.1	1.3	0.5	0.009
Q$564	F6Q609	F6Q609_MOUSE	Cct3	T-complex protein 1 subunit gamma (Fragment)	1	3.26	1	816033	633393	852395	1118540	157512	114708	110191	77613	43.2	40.5	28.9	15.5	-1.3	0.6	1	0.9	1.4	0.4	1.3	0.5	1.8	0.05	1.3	0.4	0.07
Q$13	Q80UG5-2	SEPT9_MOUSE	Sept	Isoform 2 of Septin-9	1	17.66	6	812477	726646	1131584	1454276	110963	36831	54522	134522	30.5	11.3	10.8	20.7	-1.1	0.5	1.4	0.09	1.8	0.02	1.6	0.002	2	0.02	1.3	0.1	0.0002
Q$1420	Q60737	CSK21_MOUSE	Csnk2a1	Casein kinase II subunit alpha	0.9982	9.46	2	808831	544482	922790	1205084	148337	55837	93650	232298	41	22.9	22.7	43.1	-1.5	0.4	1.1	0.5	1.5	0.5	1.7	0.05	2.2	0.2	1.3	0.5	0.04
Q$654	Q8BHD7-2	PTBP3_MOUSE	Ptbp	Isoform 2 of Polypyrimidine tract-binding protein 3	1	14.04	3	807983	666855	828903	1022769	179158	77638	119482	117955	49.6	26	32.2	25.8	-1.2	0.8	1	0.9	1.3	0.8	1.2	0.8	1.5	0.2	1.2	0.8	0.3
Q$1013	P29351-3	PTN6_MOUSE	Ptpn	Isoform 3 of Tyrosine-protein phosphatase non-receptor type 6	1	8.63	4	807888	620996	808907	1052438	64802	68828	69648	78937	17.9	24.8	19.3	16.8	-1.3	0.2	1	1	1.3	0.2	1.3	0.2	1.7	0.02	1.3	0.2	0.005
Q$749	O70378	EMC8_MOUSE	Emc8	ER membrane protein complex subunit 8	1	12.56	2	804962	769264	934796	1123612	109905	90137	88163	76000	30.5	26.2	21.1	15.1	-1	0.8	1.2	0.6	1.4	0.2	1.2	0.5	1.5	0.1	1.2	0.5	0.06
Q$1330	Q07563	COHA1_MOUSE	Col17a1	Collagen alpha-1(XVII) chain	0.975	2.11	1	802597	665286	891044	913083	67915	60772	95773	129720	18.9	20.4	24	31.8	-1.2	0.5	1.1	0.9	1.1	0.9	1.3	0.4	1.4	0.5	1	0.9	0.3
Q$1494	Q63836	SBP2_MOUSE	Selenbp2	Selenium-binding protein 2	1	6.36	2	796461	724764	842978	1058189	112228	69013	69467	168188	31.5	21.3	18.4	35.5	-1.1	0.8	1.1	0.8	1.3	0.7	1.2	0.7	1.5	0.5	1.3	0.7	0.2
Q$1339	Q9WUR2-2	ECI2_MOUSE	Eci	Isoform 2 of Enoyl-CoA delta isomerase 2, mitochondrial	1	21.23	5	794004	441177	799319	1065590	279410	68539	140375	235920	78.7	34.7	39.3	49.5	-1.8	0.7	1	1	1.3	0.7	1.8	0.3	2.4	0.3	1.3	0.7	0.2
Q$861	P06800-2	PTPRC_MOUSE	Ptpr	Isoform 2 of Receptor-type tyrosine-protein phosphatase C	1	6.01	5	790610	620797	696203	1154763	168360	125879	124783	293935	47.6	45.3	40.1	56.9	-1.3	0.8	-1.1	0.9	1.5	0.8	1.1	0.9	1.9	0.6	1.7	0.6	0.2
Q$683	G3X9U9	G3X9U9_MOUSE	Fis1	Fission 1 (Mitochondrial outer membrane) homolog (Yeast), isoform CRA_c	1	15.86	2	789331	772564	807780	1019768	49622	39421	28287	162301	14.1	11.4	7.8	35.6	-1	0.9	1	0.9	1.3	0.7	1	0.9	1.3	0.7	1.3	0.7	0.2
Q$599	Q921T2-2	TOIP1_MOUSE	Tor1aip	Isoform 2 of Torsin-1A-interacting protein 1	0.9997	10.42	4	788308	694301	972671	1133709	101073	83812	53664	122538	28.7	27	12.3	24.2	-1.1	0.5	1.2	0.4	1.4	0.2	1.4	0.1	1.6	0.1	1.2	0.5	0.02
Q$1089	P47968	RPIA_MOUSE	Rpia	Ribose-5-phosphate isomerase	0.9657	4.29	1	783837	612626	671289	826269	45878	34427	51829	76514	13.1	12.6	17.3	20.7	-1.3	0.1	-1.2	0.4	1.1	0.6	1.1	0.6	1.3	0.2	1.2	0.4	0.05
Q$476	E9PYT3	E9PYT3_MOUSE	Atl3	Atlastin-3	1	15.49	4	781585	661972	1033951	873709	79864	97116	133377	122137	22.8	32.8	28.8	31.3	-1.2	0.7	1.3	0.5	1.1	0.7	1.6	0.3	1.3	0.6	-1.2	0.7	0.2
Q$1590	Q8BG07-2	PLD4_MOUSE	Pld	Isoform 2 of Phospholipase D4	0.9996	9.7	3	777506	489880	804790	1054810	121211	33511	47478	86878	34.9	15.3	13.2	18.4	-1.6	0.2	1	0.8	1.4	0.2	1.6	0.003	2.2	0.002	1.3	0.1	0.001
Q$61	A2APD7	A2APD7_MOUSE	Nop56	Nucleolar protein 56 (Fragment)	1	8.78	2	769818	547261	877946	1151133	66975	45205	89799	150891	19.5	18.5	22.9	29.3	-1.4	0.1	1.1	0.4	1.5	0.1	1.6	0.06	2.1	0.07	1.3	0.3	0.004
Q$568	F6RAZ3	F6RAZ3_MOUSE	Acads	Short-chain-specific acyl-CoA dehydrogenase, mitochondrial (Fragment)	1	18.54	3	766229	545476	646724	835454	97693	30133	49505	53928	28.5	12.4	17.1	14.4	-1.4	0.3	-1.2	0.5	1.1	0.6	1.2	0.3	1.5	0.009	1.3	0.2	0.02
Q$1272	P81117	NUCB2_MOUSE	Nucb2	Nucleobindin-2	0.9987	7.62	2	760018	612835	846177	1010542	69569	68471	69284	134052	20.5	25	18.3	29.7	-1.2	0.4	1.1	0.5	1.3	0.4	1.4	0.2	1.6	0.2	1.2	0.5	0.04
Q$1821	Q99P72-3	RTN4_MOUSE	Rtn	Isoform 2 of Reticulon-4	1	1.53	1	759560	452792	913996	1049302	219405	121944	150534	121546	64.6	60.2	36.8	25.9	-1.7	0.7	1.2	0.8	1.4	0.7	2	0.2	2.3	0.05	1.1	0.8	0.09
Q$1997	Q9ERD7	TBB3_MOUSE	Tubb3	Tubulin beta-3 chain	1	3.78	1	754001	340047	1036908	1111377	259497	59210	138678	187933	77	38.9	29.9	37.8	-2.2	0.6	1.4	0.7	1.5	0.7	3	0.01	3.3	0.06	1.1	0.8	0.03
Q$692	G5E883	G5E883_MOUSE	Snrpa1	Small nuclear ribonucleoprotein polypeptide A', isoform CRA_a	1	36.36	3	752836	650771	819172	824085	94761	67130	20125	45395	28.1	23.1	5.5	12.3	-1.2	0.9	1.1	0.9	1.1	0.9	1.3	0.3	1.3	0.3	1	0.9	0.2
Q$201	D3YXT4	D3YXT4_MOUSE	Gm5619	Uncharacterized protein	1	17.29	4	751703	614572	838664	1104282	135196	86765	125827	98709	40.2	31.6	33.5	20	-1.2	0.7	1.1	0.7	1.5	0.3	1.4	0.5	1.8	0.03	1.3	0.4	0.05
Q$589	F6WMD1	F6WMD1_MOUSE	Lrpap1	Alpha-2-macroglobulin receptor-associated protein (Fragment)	1	8.5	1	749167	592465	1032625	5659325	194565	108021	85576	4297434	58.1	40.8	18.5	169.8	-1.3	0.8	1.4	0.7	7.6	0.8	1.7	0.07	9.6	0.8	5.5	0.8	0.3
Q$228	D3Z0M9	D3Z0M9_MOUSE	Ddx23	MCG18410, isoform CRA_a	0.9116	1.47	1	748732	643159	605235	758263	72843	69347	33296	37789	21.8	24.1	12.3	11.1	-1.2	0.7	-1.2	0.4	1	0.9	-1.1	0.9	1.2	0.6	1.3	0.09	0.2
Q$40	A2AG41	A2AG41_MOUSE	Stoml2	Stomatin-like protein 2, mitochondrial (Fragment)	1	25.82	4	746525	697310	905520	965634	29753	83948	96779	56828	8.9	26.9	23.9	13.2	-1.1	0.8	1.2	0.5	1.3	0.05	1.3	0.5	1.4	0.1	1.1	0.8	0.05
Q$2065	Q9WTL7	LYPA2_MOUSE	Lypla2	Acyl-protein thioesterase 2	0.9973	7.79	1	745713	559331	730441	887484	99930	91299	82244	82551	30	36.5	25.2	20.8	-1.3	0.7	-1	0.9	1.2	0.7	1.3	0.7	1.6	0.2	1.2	0.7	0.1
Q$729	Q99M28-2	RNPS1_MOUSE	Rnps	Isoform 2 of RNA-binding protein with serine-rich domain 1	1	14.89	2	740389	587579	735525	1038168	92123	55012	48833	98736	27.8	20.9	14.8	21.3	-1.3	0.3	-1	1	1.4	0.2	1.3	0.2	1.8	0.02	1.4	0.1	0.006
Q$1710	Q8VBT0	TMX1_MOUSE	Tmx1	Thioredoxin-related transmembrane protein 1	0.9999	8.27	2	736352	536630	903336	763202	208531	126476	242922	82364	63.3	52.7	60.1	24.1	-1.4	0.9	1.2	0.9	1	0.9	1.7	0.7	1.4	0.7	-1.2	0.9	0.5
Q$44	P25085-2	IL1RA_MOUSE	Il1r	Isoform 2 of Interleukin-1 receptor antagonist protein	1	50.94	4	733509	608552	692665	876778	88323	46064	40409	67711	26.9	16.9	13	17.3	-1.2	0.6	-1.1	0.7	1.2	0.6	1.1	0.6	1.4	0.07	1.3	0.2	0.06
Q$1321	Q04692	SMRCD_MOUSE	Smarcad1	SWI/SNF-related matrix-associated actin-dependent regulator of chromatin subfamily A containing DEAD/H box 1	0.9503	2.64	1	731933	645577	916503	1331707	75213	86766	65068	154135	23	30.1	15.9	25.9	-1.1	0.5	1.3	0.2	1.8	0.04	1.4	0.1	2.1	0.03	1.5	0.1	0.001
Q$127	B1AXH1	NHSL2_MOUSE	Nhsl2	NHS-like protein 2	0.9008	4.57	1	729632	365975	917775	1217120	185933	51723	95003	108185	57	31.6	23.1	19.9	-2	0.2	1.3	0.4	1.7	0.2	2.5	0.005	3.3	0.0006	1.3	0.2	0.001
Q$14	A2A7K5	A2A7K5_MOUSE	Mycbp	C-Myc-binding protein	0.9562	13.7	1	729490	625456	774305	1127535	154561	62786	57703	154360	47.4	22.4	16.7	30.6	-1.2	0.8	1.1	0.8	1.5	0.4	1.2	0.4	1.8	0.1	1.5	0.3	0.04
Q$431	E0CXA8	E0CXA8_MOUSE	Manf	Arginine-rich, mutated in early stage tumors, isoform CRA_c	1	35.04	5	725855	503376	956178	1092039	154815	79803	80422	141715	47.7	35.4	18.8	29	-1.4	0.5	1.3	0.5	1.5	0.4	1.9	0.02	2.2	0.03	1.1	0.5	0.02
Q$1658	Q8CCK0	H2AW_MOUSE	H2afy2	Core histone macro-H2A.2	1	6.99	2	720968	843766	664679	1158169	145018	80783	109258	449230	45	21.4	36.8	86.7	1.2	0.9	-1.1	0.9	1.6	0.9	-1.3	0.8	1.4	0.9	1.7	0.9	0.5
Q$218	D3YZT0	D3YZT0_MOUSE	Rpl9	60S ribosomal protein L9 (Fragment)	1	41.25	4	720047	576398	713285	873738	91197	79018	93284	97008	28.3	30.7	29.2	24.8	-1.2	0.8	-1	1	1.2	0.8	1.2	0.8	1.5	0.2	1.2	0.8	0.2
Q$167	D3Z5F7	D3Z5F7_MOUSE	Gm20521	Protein Gm20521	0.9995	8.41	1	718121	490186	573183	925039	49442	85092	84765	135705	15.4	38.8	33.1	32.8	-1.5	0.2	-1.3	0.4	1.3	0.4	1.2	0.5	1.9	0.1	1.6	0.2	0.02
Q$30	A2AFF6	A2AFF6_MOUSE	Stag2	Cohesin subunit SA-2	0.9253	1.66	1	716140	401860	990085	1181300	164530	56207	137952	79595	51.4	31.3	31.2	15.1	-1.8	0.3	1.4	0.4	1.6	0.1	2.5	0.02	2.9	0.0003	1.2	0.4	0.001
Q$160	D3YU45	D3YU45_MOUSE	Gm3940	Protein Gm3940	1	6.29	1	715517	789187	974975	1150425	234004	263136	374733	236586	73.1	74.6	85.9	46	1.1	1	1.4	1	1.6	0.8	1.2	1	1.5	0.9	1.2	1	0.7
Q$2033	Q9QUR6	PPCE_MOUSE	Prep	Prolyl endopeptidase	0.9641	2.39	1	714457	736029	671582	877571	140767	75056	92509	61220	44.1	22.8	30.8	15.6	1	1	-1.1	1	1.2	0.8	-1.1	0.9	1.2	0.6	1.3	0.5	0.5
Q$186	Q921Z5-2	TFIP8_MOUSE	Tnfaip	Isoform 2 of Tumor necrosis factor alpha-induced protein 8	0.9367	14.71	1	709454	601252	822695	1087813	99689	66644	86049	136802	31.4	24.8	23.4	28.1	-1.2	0.6	1.2	0.6	1.5	0.2	1.4	0.3	1.8	0.07	1.3	0.4	0.02
Q$1977	Q9DC70	NDUS7_MOUSE	Ndufs7	NADH dehydrogenase [ubiquinone] iron-sulfur protein 7, mitochondrial	1	6.25	1	707560	614793	655219	796665	101016	57469	71065	84837	31.9	20.9	24.3	23.8	-1.2	0.9	-1.1	0.9	1.1	0.9	1.1	0.9	1.3	0.5	1.2	0.7	0.4
Q$86	A2CER2	A2CER2_MOUSE	Rcc1	Regulator of chromosome condensation (Fragment)	1	25	1	706427	768127	819993	832020	53857	126384	158731	61525	17	36.8	43.3	16.5	1.1	1	1.2	1	1.2	0.7	1.1	1	1.1	1	1	1	0.8
Q$451	E9PV38	E9PV38_MOUSE	Ces2g	Protein Ces2g	0.9946	5.36	2	706419	684280	866343	1094459	110319	129464	124360	98673	34.9	42.3	32.1	20.2	-1	0.9	1.2	0.7	1.5	0.2	1.3	0.7	1.6	0.2	1.3	0.6	0.08
Q$212	D3YYQ4	D3YYQ4_MOUSE	Car1	Carbonic anhydrase 1 (Fragment)	1	13.04	1	694818	501132	966320	972575	164126	107358	115335	59613	52.8	47.9	26.7	13.7	-1.4	0.6	1.4	0.5	1.4	0.5	1.9	0.09	1.9	0.03	1	1	0.03
Q$520	E9Q514	E9Q514_MOUSE	Ndrg1	Protein NDRG1 (Fragment)	1	39.01	2	693823	499481	713006	1232179	140221	32719	74398	385450	45.2	14.6	23.3	69.9	-1.4	0.6	1	0.9	1.8	0.6	1.4	0.2	2.5	0.5	1.7	0.6	0.1
Q$538	E9Q855	E9Q855_MOUSE	Scamp3	Secretory carrier-associated membrane protein 3	0.9773	11.43	2	691675	574763	681851	811220	40384	26667	52950	71692	13.1	10.4	17.4	19.8	-1.2	0.2	-1	0.9	1.2	0.5	1.2	0.4	1.4	0.09	1.2	0.5	0.04
Q$113	B1ART1	B1ART1_MOUSE	Vps13d	Protein Vps13d	0.9205	0.67	1	688558	569601	858200	737175	148523	70409	75807	30189	48.2	27.6	19.8	9.2	-1.2	0.7	1.2	0.7	1.1	0.8	1.5	0.1	1.3	0.3	-1.2	0.5	0.2
Q$1040	P35279-2	RAB6A_MOUSE	Rab6	Isoform 2 of Ras-related protein Rab-6A	1	10.58	2	688078	650499	668240	692752	107561	60020	69969	119851	35	20.6	23.4	38.7	-1.1	1	-1	1	1	1	1	1	1.1	1	1	1	1
Q$1827	Q9CPN9	Q9CPN9_MOUSE	2210010C04Rik	Protein 2210010C04Rik	0.921	9.31	1	687280	564559	1078537	1098242	88700	88124	417324	378988	28.9	34.9	86.5	77.2	-1.2	0.8	1.6	0.8	1.6	0.8	1.9	0.8	1.9	0.8	1	1	0.5
Q$561	Q05920	PYC_MOUSE	Pc	Pyruvate carboxylase, mitochondrial	0.9994	2.97	2	686704	400089	777273	1063686	130366	79995	102965	82266	42.5	44.7	29.6	17.3	-1.7	0.2	1.1	0.6	1.5	0.2	1.9	0.1	2.7	0.002	1.4	0.2	0.003
Q$1944	Q9D6U8	F162A_MOUSE	Fam162a	Protein FAM162A	0.9774	12.9	1	684900	662047	735925	995679	118881	118144	74788	99500	38.8	39.9	22.7	22.3	-1	0.9	1.1	0.9	1.5	0.3	1.1	0.9	1.5	0.3	1.4	0.3	0.1
Q$1452	Q61462-2	CY24A_MOUSE	Cyb	Isoform 2 of Cytochrome b-245 light chain	0.9937	17.07	1	684858	646165	854535	883884	87855	75584	59577	107677	28.7	26.2	15.6	27.2	-1.1	0.9	1.2	0.5	1.3	0.5	1.3	0.3	1.4	0.4	1	0.9	0.2
Q$1299	P97742	CPT1A_MOUSE	Cpt1a	Carnitine O-palmitoyltransferase 1, liver isoform	0.9615	3.62	1	683143	655039	767808	801103	91295	118265	120425	104987	29.9	40.4	35.1	29.3	-1	1	1.1	0.9	1.2	0.9	1.2	0.9	1.2	0.9	1	1	0.8
Q$1349	Q8BFY9-2	TNPO1_MOUSE	Tnpo	Isoform 2 of Transportin-1	1	4.16	2	682638	545416	696025	784922	124350	118932	122470	74893	40.7	48.8	39.3	21.3	-1.3	0.9	1	0.9	1.1	0.9	1.3	0.9	1.4	0.6	1.1	0.9	0.5
Q$244	E9Q317	E9Q317_MOUSE	Gm10094	Histone deacetylase complex subunit SAP18	0.9997	24.42	2	680485	601908	749021	912368	71490	98239	61566	82067	23.5	36.5	18.4	20.1	-1.1	0.7	1.1	0.7	1.3	0.3	1.2	0.6	1.5	0.2	1.2	0.5	0.08
Q$764	O09005	DEGS1_MOUSE	Degs1	Sphingolipid delta(4)-desaturase DES1	0.9835	4.95	1	679515	678890	760847	776637	83144	44381	63349	86142	27.4	14.6	18.6	24.8	-1	1	1.1	0.9	1.1	0.9	1.1	0.9	1.1	0.9	1	1	0.7
Q$1080	P46978	STT3A_MOUSE	Stt3a	Dolichyl-diphosphooligosaccharide--protein glycosyltransferase subunit STT3A	0.9997	3.69	2	678108	641718	785277	748261	40915	77467	59917	62527	13.5	27	17.1	18.7	-1.1	0.9	1.2	0.7	1.1	0.8	1.2	0.7	1.2	0.8	-1	0.9	0.4
Q$1841	Q9CQ40	RM49_MOUSE	Mrpl49	39S ribosomal protein L49, mitochondrial	0.9504	8.43	1	673385	550621	534487	660355	69992	59181	46664	53548	23.2	24	19.5	18.1	-1.2	0.6	-1.3	0.5	-1	1	-1	1	1.2	0.6	1.2	0.5	0.2
Q$442	E0CZ09	E0CZ09_MOUSE	Gsx2	GS homeobox 2	0.965	35.07	1	666476	369675	896398	1092135	100428	63172	77500	108846	33.7	38.2	19.3	22.3	-1.8	0.1	1.3	0.2	1.6	0.08	2.4	0.004	3	0.003	1.2	0.2	0.0002
Q$161	D3YU09	D3YU09_MOUSE	Gda	Guanine deaminase	1	11.58	2	666044	398953	617638	666753	157672	57365	62767	49744	52.9	32.2	22.7	16.7	-1.7	0.5	-1.1	1	1	1	1.5	0.2	1.7	0.05	1.1	0.9	0.2
Q$1372	Q3UEB3-2	PUF60_MOUSE	Puf6	Isoform 2 of Poly(U)-binding-splicing factor PUF60	0.9996	9.32	3	665915	540100	709229	839331	97317	48551	96429	95176	32.7	20.1	30.4	25.4	-1.2	0.7	1.1	0.8	1.3	0.7	1.3	0.6	1.6	0.1	1.2	0.7	0.2
Q$115	B1AT92	B1AT92_MOUSE	Grb2	Growth factor receptor-bound protein 2	0.9965	8.37	1	664634	509654	541882	778543	125075	75225	103357	47046	42.1	33	42.7	13.5	-1.3	0.8	-1.2	0.8	1.2	0.8	1.1	0.8	1.5	0.09	1.4	0.3	0.2
Q$1480	Q62261-2	SPTB2_MOUSE	Sptbn	Isoform 2 of Spectrin beta chain, non-erythrocytic 1	1	1.35	2	664129	616967	821495	791664	101209	65400	84538	91621	34.1	23.7	23	25.9	-1.1	0.9	1.2	0.7	1.2	0.8	1.3	0.4	1.3	0.6	-1	0.9	0.3
Q$2063	Q9R1T2-2	SAE1_MOUSE	Sae	Isoform 2 of SUMO-activating enzyme subunit 1	0.9993	10.06	2	663919	503506	727643	940419	92867	70646	76452	77042	31.3	31.4	23.5	18.3	-1.3	0.4	1.1	0.6	1.4	0.2	1.4	0.2	1.9	0.02	1.3	0.2	0.01
Q$1148	P59325	IF5_MOUSE	Eif5	Eukaryotic translation initiation factor 5	1	2.1	1	663365	446762	874180	1230147	136043	68058	69733	121358	45.9	34.1	17.8	22.1	-1.5	0.3	1.3	0.3	1.9	0.06	2	0.01	2.8	0.003	1.4	0.1	0.0005
Q$1865	Q9CR51	VATG1_MOUSE	Atp6v1g1	V-type proton ATPase subunit G 1	1	27.97	3	660734	552439	738574	997375	110865	75788	87041	120945	37.5	30.7	26.4	27.1	-1.2	0.7	1.1	0.7	1.5	0.3	1.3	0.4	1.8	0.08	1.4	0.4	0.04
Q$1556	Q78IK2	USMG5_MOUSE	Usmg5	Up-regulated during skeletal muscle growth protein 5	0.9995	25.86	1	659297	543706	636172	842299	93302	81748	104469	54985	31.6	33.6	36.7	14.6	-1.2	0.8	-1	0.9	1.3	0.5	1.2	0.8	1.5	0.09	1.3	0.5	0.1
Q$1730	Q8WTY4	CPIN1_MOUSE	Ciapin1	Anamorsin	0.9999	13.92	2	658082	602230	739622	727398	111433	64703	108689	61956	37.9	24	32.9	19	-1.1	1	1.1	1	1.1	1	1.2	0.8	1.2	0.7	-1	1	0.7
Q$678	G3X919	G3X919_MOUSE	Tbx18	T-box transcription factor TBX18	0.9259	1.79	1	657487	855210	887072	2036506	173032	394549	434860	1163240	58.8	103.2	109.6	127.7	1.3	1	1.3	1	3.1	0.9	1	1	2.4	0.9	2.3	0.9	0.5
Q$1422	Q60857	SC6A4_MOUSE	Slc6a4	Sodium-dependent serotonin transporter	0.9842	2.54	1	654434	566769	587958	667986	81109	46501	56246	50786	27.7	18.3	21.4	17	-1.2	0.9	-1.1	0.9	1	1	1	1	1.2	0.7	1.1	0.9	0.6
Q$1195	P62715	PP2AB_MOUSE	Ppp2cb	Serine/threonine-protein phosphatase 2A catalytic subunit beta isoform	1	8.41	2	654021	553788	790753	820013	65040	41857	61925	30172	22.2	16.9	17.5	8.2	-1.2	0.4	1.2	0.4	1.3	0.2	1.4	0.06	1.5	0.005	1	0.7	0.007
Q$158	D3YTS1	D3YTS1_MOUSE	Sec11a	Sec11-like 1 (S. cerevisiae), isoform CRA_d	0.9904	8.5	2	652792	499084	626346	1256409	169528	92873	91554	537338	58.1	41.6	32.7	95.6	-1.3	0.8	-1	0.9	1.9	0.8	1.3	0.8	2.5	0.8	2	0.8	0.3
Q$438	E0CY42	E0CY42_MOUSE	Clic6	Chloride intracellular channel protein 6 (Fragment)	1	8	1	651860	623993	490983	519040	45999	33516	44266	17536	15.8	12	20.2	7.6	-1	0.8	-1.3	0.1	-1.3	0.1	-1.3	0.1	-1.2	0.1	1.1	0.8	0.02
Q$1103	P49962	SRP09_MOUSE	Srp9	Signal recognition particle 9 kDa protein	0.9555	12.79	1	646874	560546	837446	1090421	77504	48435	106909	139531	26.8	19.3	28.5	28.6	-1.2	0.5	1.3	0.5	1.7	0.1	1.5	0.2	1.9	0.04	1.3	0.5	0.008
Q$1882	Q9CX34	SUGT1_MOUSE	Sugt1	Suppressor of G2 allele of SKP1 homolog	0.9999	6.85	2	646275	403812	754356	862471	115878	50043	76768	82383	40.1	27.7	22.8	21.4	-1.6	0.3	1.2	0.6	1.3	0.4	1.9	0.03	2.1	0.009	1.1	0.6	0.009
Q$471	Q91V12-2	BACH_MOUSE	Acot	Isoform A of Cytosolic acyl coenzyme A thioester hydrolase	0.9999	6.8	2	644889	532115	640071	609454	78687	43691	45139	63269	27.3	18.4	15.8	23.2	-1.2	0.8	-1	1	-1.1	1	1.2	0.5	1.1	0.8	-1.1	1	0.5
Q$195	D3Z568	D3Z568_MOUSE	Ndufb5	NADH dehydrogenase (Ubiquinone) 1 beta subcomplex, 5, isoform CRA_e	0.9943	12.61	2	643656	493761	618424	702669	56381	49861	49315	46367	19.6	22.6	17.8	14.8	-1.3	0.3	-1	0.7	1.1	0.7	1.3	0.4	1.4	0.09	1.1	0.6	0.06
Q$2048	Q9QZI9	SERC3_MOUSE	Serinc3	Serine incorporator 3	0.9161	2.75	1	639367	585809	865103	884064	94341	50053	187028	161965	33	19.1	48.3	41	-1.1	0.9	1.4	0.7	1.4	0.7	1.5	0.7	1.5	0.6	1	0.9	0.3
Q$72	Q3TUJ9	Q3TUJ9_MOUSE	Tpd52l2	Tumor protein D52-like 2, isoform CRA_a	0.9582	16.13	1	634055	437652	616035	770917	111644	60523	42605	60838	39.4	30.9	15.5	17.6	-1.4	0.4	-1	0.9	1.2	0.5	1.4	0.2	1.8	0.03	1.3	0.3	0.04
Q$1235	P63268	ACTH_MOUSE	Actg2	Actin, gamma-enteric smooth muscle	1	7.45	1	633927	446867	883941	1037188	129225	96408	111520	125522	45.6	48.2	28.2	27.1	-1.4	0.5	1.4	0.5	1.6	0.2	2	0.09	2.3	0.03	1.2	0.5	0.01
Q$1647	Q8C522	ENDD1_MOUSE	Endod1	Endonuclease domain-containing 1 protein	1	9.18	2	631135	502300	605070	701435	138982	71857	63340	124081	49.2	32	23.4	39.6	-1.3	0.9	-1	0.9	1.1	0.9	1.2	0.8	1.4	0.7	1.2	0.9	0.6
Q$657	Q9D7G0	PRPS1_MOUSE	Prps1	Ribose-phosphate pyrophosphokinase 1	1	22.01	4	630305	507737	690044	907275	60158	41035	52287	105529	21.3	18.1	16.9	26	-1.2	0.3	1.1	0.5	1.4	0.2	1.4	0.1	1.8	0.05	1.3	0.3	0.007
Q$1499	Q64261	CDK6_MOUSE	Cdk6	Cyclin-dependent kinase 6	0.9993	4.6	1	626429	516760	628078	799169	84694	53299	97583	119931	30.2	23.1	34.7	33.6	-1.2	0.8	1	1	1.3	0.8	1.2	0.8	1.5	0.3	1.3	0.8	0.2
Q$466	E9PXX7	E9PXX7_MOUSE	Txndc5	Thioredoxin domain-containing protein 5	0.9998	12.79	3	626034	470246	633385	658412	77725	41736	55963	49426	27.8	19.8	19.8	16.8	-1.3	0.4	1	1	1.1	1	1.3	0.2	1.4	0.1	1	1	0.1
Q$1951	Q9D8C9	Q9D8C9_MOUSE	Pnp2	Purine nucleoside phosphorylase	1	7.21	1	623925	441883	615524	1035553	163531	89285	101526	123101	58.6	45.2	36.9	26.6	-1.4	0.6	-1	1	1.7	0.3	1.4	0.6	2.3	0.03	1.7	0.1	0.02
Q$1701	Q8R2P8	Q8R2P8_MOUSE	Kars	Lysine--tRNA ligase	1	4.01	2	623499	623371	814469	1416624	103845	117150	250996	433568	37.2	42	68.9	68.4	-1	1	1.3	0.9	2.3	0.6	1.3	0.9	2.3	0.6	1.7	0.7	0.1
Q$2015	Q9JIG8	PRAF2_MOUSE	Praf2	PRA1 family protein 2	0.978	6.18	1	622607	573575	557317	787244	50330	19298	37466	27792	18.1	7.5	15	7.9	-1.1	0.7	-1.1	0.7	1.3	0.08	-1	0.7	1.4	0.001	1.4	0.006	0.001
Q$7	A2A591	KRA31_MOUSE	Krtap3-1	Keratin-associated protein 3-1	0.9998	17.35	2	615924	626959	486248	4593731	146141	316362	48886	3388437	53.1	112.8	22.5	164.9	1	1	-1.3	0.9	7.5	0.9	-1.3	0.9	7.3	0.9	9.4	0.9	0.3
Q$964	P19973-2	LSP1_MOUSE	Lsp	Isoform 2 of Lymphocyte-specific protein 1	1	21.65	4	609901	543924	563985	712352	66054	60158	38635	66699	24.2	24.7	15.3	20.9	-1.1	0.9	-1.1	0.9	1.2	0.8	1	0.9	1.3	0.4	1.3	0.4	0.2
Q$1032	P32067	LA_MOUSE	Ssb	Lupus La protein homolog	1	13.01	4	609770	584150	865865	1173157	68314	129641	68232	270662	25.1	49.6	17.6	51.6	-1	0.9	1.4	0.2	1.9	0.4	1.5	0.4	2	0.4	1.4	0.5	0.06
Q$283	D3Z7U0	D3Z7U0_MOUSE	Anxa11	Annexin	1	6.26	2	604200	493599	626644	823498	99545	75490	112749	75647	36.8	34.2	40.2	20.5	-1.2	0.7	1	0.9	1.4	0.5	1.3	0.7	1.7	0.09	1.3	0.6	0.1
Q$226	D3Z0K1	D3Z0K1_MOUSE	Ndufv1	NADH dehydrogenase [ubiquinone] flavoprotein 1, mitochondrial (Fragment)	0.9999	35.62	3	603899	371678	673628	809774	139246	31505	137883	81051	51.6	19	45.8	22.4	-1.6	0.5	1.1	0.7	1.3	0.6	1.8	0.4	2.2	0.006	1.2	0.7	0.07
Q$1805	Q99LB6-2	MAT2B_MOUSE	Mat2	Isoform 2 of Methionine adenosyltransferase 2 subunit beta	0.9983	11.46	2	602266	452766	589670	862283	88780	29979	39647	63320	33	14.8	15	16.4	-1.3	0.3	-1	0.9	1.4	0.1	1.3	0.1	1.9	0.002	1.5	0.03	0.002
Q$1717	Q8VDL4-2	ADPGK_MOUSE	Adpg	Isoform 2 of ADP-dependent glucokinase	1	18.24	2	600341	466258	473633	467177	71775	46541	36410	48273	26.7	22.3	17.2	23.1	-1.3	0.6	-1.3	0.6	-1.3	0.6	1	1	1	1	-1	1	0.2
Q$146	Q9ESX5	DKC1_MOUSE	Dkc1	H/ACA ribonucleoprotein complex subunit 4	0.9999	5.3	2	598261	621878	784818	755166	38734	108275	137048	109731	14.5	38.9	39	32.5	1	1	1.3	0.8	1.3	0.8	1.3	0.9	1.2	0.9	-1	1	0.5
Q$163	D3YU33	D3YU33_MOUSE	Mboat7	Lysophospholipid acyltransferase 7	0.9974	3.49	1	597614	513419	688948	692008	91444	94731	211682	154244	34.2	41.3	68.7	49.8	-1.2	1	1.2	1	1.2	1	1.3	1	1.3	0.9	1	1	0.8
Q$449	E9PUY9	E9PUY9_MOUSE	Eci2	Enoyl-CoA delta isomerase 2, mitochondrial (Fragment)	1	29.7	4	597260	327552	567906	700350	233119	40202	97679	193762	87.3	27.4	38.5	61.9	-1.8	0.8	-1.1	0.9	1.2	0.9	1.7	0.3	2.1	0.5	1.2	0.9	0.4
Q$658	P01901	HA1B_MOUSE	H2-K1	H-2 class I histocompatibility antigen, K-B alpha chain	1	3.52	1	594299	538675	636177	673618	47187	52935	56972	58888	17.8	22	20	19.5	-1.1	0.8	1.1	0.8	1.1	0.8	1.2	0.8	1.3	0.6	1.1	0.8	0.4
Q$569	Q9JIX8-4	ACINU_MOUSE	Acin	Isoform 4 of Apoptotic chromatin condensation inducer in the nucleus	0.9903	2.47	2	591817	431419	640994	836117	123400	71981	97387	104149	46.6	37.3	34	27.9	-1.4	0.5	1.1	0.8	1.4	0.5	1.5	0.5	1.9	0.07	1.3	0.5	0.08
Q$236	D3Z1M1	D3Z1M1_MOUSE	Gnb2	Guanine nucleotide-binding protein G(I)/G(S)/G(T) subunit beta-2 (Fragment)	1	9.69	2	591456	394483	606633	822813	121976	58158	77613	73298	46.1	33	28.6	19.9	-1.5	0.4	1	0.9	1.4	0.4	1.5	0.3	2.1	0.01	1.4	0.3	0.02
Q$1641	Q8BYQ0	Q8BYQ0_MOUSE	Nceh1	Arylacetamide deacetylase-like 1, isoform CRA_c	0.9986	7.04	1	589285	303921	673938	959405	131445	78537	98066	76957	49.9	57.8	32.5	17.9	-1.9	0.2	1.1	0.6	1.6	0.2	2.2	0.09	3.2	0.002	1.4	0.2	0.002
Q$1133	P55258	RAB8A_MOUSE	Rab8a	Ras-related protein Rab-8A	1	6.76	1	587689	373752	516880	979316	127378	92741	136495	105239	48.5	55.5	59	24	-1.6	0.5	-1.1	0.7	1.7	0.2	1.4	0.7	2.6	0.02	1.9	0.1	0.01
Q$460	E9PWM7	E9PWM7_MOUSE	Gnb2	Guanine nucleotide-binding protein G(I)/G(S)/G(T) subunit beta-2	1	49.58	6	587065	513667	679422	851104	66968	56692	21978	55827	25.5	24.7	7.2	14.7	-1.1	0.4	1.2	0.4	1.4	0.08	1.3	0.08	1.7	0.02	1.3	0.08	0.002
Q$63	A2AR07	A2AR07_MOUSE	Ssb	Lupus La protein homolog (Fragment)	1	23.37	3	586889	560657	840304	1151941	67062	121834	64903	269974	25.6	48.6	17.3	52.4	-1	0.9	1.4	0.1	2	0.3	1.5	0.3	2.1	0.3	1.4	0.5	0.05
Q$1913	Q9D0R8	LSM12_MOUSE	Lsm12	Protein LSM12 homolog	0.997	6.67	1	586488	421548	523219	524355	63454	50942	51861	51642	24.2	27	22.2	22	-1.4	0.4	-1.1	0.8	-1.1	0.8	1.2	0.7	1.2	0.7	1	1	0.2
Q$673	P60605	UB2G2_MOUSE	Ube2g2	Ubiquitin-conjugating enzyme E2 G2	0.9562	13.33	1	585670	449958	696251	812955	101529	46206	69372	70372	38.8	23	22.3	19.4	-1.3	0.6	1.2	0.6	1.4	0.4	1.5	0.09	1.8	0.02	1.2	0.6	0.02
Q$625	F8WH69	F8WH69_MOUSE	Ncf1	Neutrophil cytosol factor 1	0.9995	7.18	2	581197	441427	700393	778563	114900	60016	96456	89050	44.2	30.4	30.8	25.6	-1.3	0.7	1.2	0.7	1.3	0.6	1.6	0.2	1.8	0.08	1.1	0.7	0.09
Q$1704	Q8R326-2	PSPC1_MOUSE	Pspc	Isoform 2 of Paraspeckle component 1	0.9542	4.94	1	580654	457242	787885	833219	72394	65632	39507	90490	27.9	32.1	11.2	24.3	-1.3	0.4	1.4	0.1	1.4	0.2	1.7	0.02	1.8	0.05	1.1	0.7	0.004
Q$1748	Q91YH5-2	ATLA3_MOUSE	Atl	Isoform 2 of Atlastin-3	1	11.94	2	580560	471254	823041	624321	66496	67756	118556	101474	25.6	32.1	32.2	36.3	-1.2	0.7	1.4	0.4	1.1	0.7	1.7	0.2	1.3	0.7	-1.3	0.7	0.09
Q$1832	Q9CPS5	Q9CPS5_MOUSE	Psmd8	26S proteasome non-ATPase regulatory subunit 8	0.9999	15.92	2	580268	383761	668221	968284	110289	61127	50521	60838	42.5	35.6	16.9	14	-1.5	0.3	1.2	0.5	1.7	0.04	1.7	0.03	2.5	0.0008	1.4	0.03	0.0004
Q$895	P10711	TCEA1_MOUSE	Tcea1	Transcription elongation factor A protein 1	0.9955	3.32	1	575608	398184	848534	2603278	75974	39821	187631	1254075	29.5	22.4	49.4	107.7	-1.4	0.4	1.5	0.5	4.5	0.5	2.1	0.4	6.5	0.5	3.1	0.5	0.09
Q$1343	Q3TE40	Q3TE40_MOUSE	Rpa2	DNA-directed RNA polymerase I subunit RPA2	0.9998	12.96	2	572384	358448	733717	1212763	116994	95133	113547	298029	45.7	59.3	34.6	55	-1.6	0.4	1.3	0.4	2.1	0.3	2	0.2	3.4	0.2	1.7	0.4	0.02
Q$1064	P42208	SEPT2_MOUSE	Sept2	Septin-2	1	12.47	3	572092	514701	635959	718059	51124	40850	36563	80021	20	17.7	12.9	24.9	-1.1	0.7	1.1	0.7	1.3	0.5	1.2	0.3	1.4	0.3	1.1	0.7	0.09
Q$1694	Q8R010	AIMP2_MOUSE	Aimp2	Aminoacyl tRNA synthase complex-interacting multifunctional protein 2	0.9998	12.81	2	566525	479884	460910	637216	65378	33816	33971	27355	25.8	15.8	16.5	9.6	-1.2	0.6	-1.2	0.6	1.1	0.6	-1	0.7	1.3	0.03	1.4	0.02	0.04
Q$699	H3BJ37	H3BJ37_MOUSE	Comtd1	Catechol O-methyltransferase domain-containing protein 1	1	19	2	557458	477907	557995	619538	41219	26268	45180	37561	16.5	12.3	18.1	13.6	-1.2	0.5	1	1	1.1	0.7	1.2	0.5	1.3	0.09	1.1	0.7	0.1
Q$1009	P28474	ADHX_MOUSE	Adh5	Alcohol dehydrogenase class-3	0.9048	7.49	1	557084	330493	535076	821711	135431	55459	73077	70098	54.4	37.5	30.5	19.1	-1.7	0.3	-1	0.9	1.5	0.3	1.6	0.2	2.5	0.003	1.5	0.1	0.01
Q$1129	P54728	RD23B_MOUSE	Rad23b	UV excision repair protein RAD23 homolog B	0.9867	4.57	1	556443	454747	905770	1470390	111671	48330	92997	117848	44.9	23.8	23	17.9	-1.2	0.4	1.6	0.08	2.6	0.002	2	0.01	3.2	0.0003	1.6	0.02	6e-06
Q$1635	Q8BVY0	Q8BVY0_MOUSE	Rsl1d1	Protein Rsl1d1	1	4.87	2	550259	394158	456911	738918	86299	15747	41599	93528	35.1	8.9	20.4	28.3	-1.4	0.5	-1.2	0.5	1.3	0.5	1.2	0.5	1.9	0.1	1.6	0.1	0.01
Q$1656	Q8CB87	RAB44_MOUSE	Rab44	Ras-related protein Rab-44	1	4	1	549288	389307	567075	472045	82351	51348	85334	65206	33.5	29.5	33.6	30.9	-1.4	0.5	1	0.9	-1.2	0.8	1.5	0.5	1.2	0.8	-1.2	0.8	0.3
Q$858	P05555-2	ITAM_MOUSE	Itga	Isoform 2 of Integrin alpha-M	1	4.73	4	548091	493563	550943	731722	60568	29668	36153	71718	24.7	13.4	14.7	21.9	-1.1	0.7	1	1	1.3	0.3	1.1	0.6	1.5	0.09	1.3	0.2	0.03
Q$282	Q3TBD2-2	HMHA1_MOUSE	Hmha	Isoform 2 of Minor histocompatibility protein HA-1	0.9158	0.8	1	543650	326875	536538	587123	61334	22550	58145	81162	25.2	15.4	24.2	30.9	-1.7	0.06	-1	0.9	1.1	0.9	1.6	0.06	1.8	0.1	1.1	0.9	0.03
Q$768	O09131	GSTO1_MOUSE	Gsto1	Glutathione S-transferase omega-1	1	4.17	1	542740	489987	611848	768316	60130	52606	52339	73082	24.8	24	19.1	21.3	-1.1	0.7	1.1	0.7	1.4	0.2	1.2	0.4	1.6	0.09	1.3	0.4	0.03
Q$1338	Q3TBW2	RM10_MOUSE	Mrpl10	39S ribosomal protein L10, mitochondrial	1	7.25	1	541487	482150	612731	652945	97388	128716	83586	87167	40.2	59.7	30.5	29.9	-1.1	0.9	1.1	0.9	1.2	0.9	1.3	0.9	1.4	0.9	1.1	0.9	0.6
Q$1229	P63087-2	PP1G_MOUSE	Ppp1c	Isoform Gamma-2 of Serine/threonine-protein phosphatase PP1-gamma catalytic subunit	1	18.99	4	540554	469255	471445	574234	63803	37660	37438	26979	26.4	17.9	17.8	10.5	-1.2	0.8	-1.1	0.8	1.1	0.9	1	1	1.2	0.3	1.2	0.3	0.3
Q$866	P07744	K2C4_MOUSE	Krt4	Keratin, type II cytoskeletal 4	0.9488	2.86	1	539299	296386	420977	582339	124562	45492	55795	70563	51.6	34.3	29.6	27.1	-1.8	0.4	-1.3	0.7	1.1	0.8	1.4	0.4	2	0.05	1.4	0.4	0.09
Q$1164	P61164	ACTZ_MOUSE	Actr1a	Alpha-centractin	0.9942	2.39	1	537129	443140	552336	823426	103895	102544	71433	131154	43.3	51.7	28.9	35.6	-1.2	0.8	1	0.9	1.5	0.4	1.2	0.8	1.9	0.3	1.5	0.4	0.1
Q$1498	Q99JA5	Q99JA5_MOUSE	Ly6e	Ly6e protein	0.9518	10.29	1	535005	456327	526295	658853	69841	38981	93801	56389	29.2	19.1	39.9	19.1	-1.2	0.7	-1	0.9	1.2	0.7	1.2	0.8	1.4	0.1	1.3	0.7	0.2
Q$166	D3YUA3	D3YUA3_MOUSE	Pfkp	6-phosphofructokinase type C (Fragment)	1	32.93	2	532396	348307	751050	845180	154451	87881	113056	59233	64.9	56.4	33.7	15.7	-1.5	0.6	1.4	0.6	1.6	0.3	2.2	0.1	2.4	0.009	1.1	0.6	0.02
Q$1676	Q8K0C4	CP51A_MOUSE	Cyp51a1	Lanosterol 14-alpha demethylase	0.9969	4.97	1	526615	503124	552521	505636	39225	51126	52614	37515	16.7	22.7	21.3	16.6	-1	1	1	1	-1	1	1.1	1	1	1	-1.1	1	0.9
Q$628	Q569Z5-2	DDX46_MOUSE	Ddx4	Isoform 2 of Probable ATP-dependent RNA helicase DDX46	0.9995	2.14	2	525197	491971	694830	900733	133566	71803	61611	121869	56.9	32.6	19.8	30.3	-1.1	0.8	1.3	0.5	1.7	0.3	1.4	0.3	1.8	0.1	1.3	0.4	0.04
Q$181	D3YVY3	D3YVY3_MOUSE	Idh1	Isocitrate dehydrogenase [NADP] cytoplasmic (Fragment)	1	9.09	1	524380	438281	476340	547098	35535	16285	26786	21653	15.2	8.3	12.6	8.8	-1.2	0.3	-1.1	0.6	1	0.6	1.1	0.6	1.2	0.02	1.1	0.3	0.04
Q$452	E9PV58	E9PV58_MOUSE	Tnpo2	Transportin-2	1	2.79	1	517246	406128	540610	608938	103157	106306	105476	52871	44.6	58.5	43.6	19.4	-1.3	0.9	1	0.9	1.2	0.9	1.3	0.9	1.5	0.6	1.1	0.9	0.5
Q$535	E9Q7G4	E9Q7G4_MOUSE	Bahcc1	BAH and coiled-coil domain-containing protein 1	0.9729	1.25	2	511777	386436	553156	700841	104178	60884	59312	65918	45.5	35.2	24	21	-1.3	0.6	1.1	0.7	1.4	0.4	1.4	0.4	1.8	0.05	1.3	0.4	0.06
Q$447	E9PUV4	E9PUV4_MOUSE	Skp1a	S-phase kinase-associated protein 1 (Fragment)	1	30.21	1	509204	311641	657997	835340	93146	47310	47596	79051	40.9	33.9	16.2	21.2	-1.6	0.2	1.3	0.2	1.6	0.1	2.1	0.004	2.7	0.003	1.3	0.2	0.0005
Q$1123	P53702	CCHL_MOUSE	Hccs	Cytochrome c-type heme lyase	0.9999	5.51	1	508763	321796	454114	484513	101405	58604	51315	65981	44.6	40.7	25.3	30.5	-1.6	0.5	-1.1	1	-1.1	1	1.4	0.5	1.5	0.5	1.1	1	0.3
Q$1273	P83870	PHF5A_MOUSE	Phf5a	PHD finger-like domain-containing protein 5A	0.9865	14.55	1	507823	397301	446468	541459	60478	49436	63578	13303	26.6	27.8	31.8	5.5	-1.3	0.7	-1.1	0.9	1.1	0.9	1.1	0.9	1.4	0.2	1.2	0.7	0.2
Q$596	P61961	UFM1_MOUSE	Ufm1	Ubiquitin-fold modifier 1	0.9999	58.82	2	505315	459449	463068	690613	53201	45604	55150	93299	23.5	22.2	26.6	30.2	-1.1	0.9	-1.1	0.9	1.4	0.4	1	1	1.5	0.3	1.5	0.3	0.07
Q$1345	Q9R0U0-2	SRS10_MOUSE	Srsf1	Isoform 2 of Serine/arginine-rich splicing factor 10	1	10.34	2	501920	404817	678402	1034504	72177	32069	81107	152914	32.2	17.7	26.7	33.1	-1.2	0.3	1.4	0.3	2.1	0.08	1.7	0.08	2.6	0.08	1.5	0.2	0.001
Q$1485	Q62418-2	DBNL_MOUSE	Dbn	Isoform 2 of Drebrin-like protein	1	9.24	2	498976	338742	553229	775386	105049	62969	60735	66336	47.1	41.6	24.5	19.1	-1.5	0.4	1.1	0.7	1.6	0.2	1.6	0.2	2.3	0.008	1.4	0.2	0.008
Q$1591	Q8BG32	PSD11_MOUSE	Psmd11	26S proteasome non-ATPase regulatory subunit 11	1	11.85	4	494349	524570	507762	655878	32441	111923	51392	99260	14.7	47.7	22.6	33.8	1.1	1	1	1	1.3	0.6	-1	1	1.3	0.9	1.3	0.7	0.5
Q$20	A2A9X5	A2A9X5_MOUSE	Nt5c	5'(3')-deoxyribonucleotidase, cytosolic type	0.9993	6.7	1	494024	429822	464940	558915	46943	24443	32428	32967	21.2	12.7	15.6	13.2	-1.1	0.7	-1.1	0.7	1.1	0.7	1.1	0.7	1.3	0.08	1.2	0.3	0.1
Q$214	D3Z7G0	D3Z7G0_MOUSE	Ugt1a10	UDP-glucuronosyltransferase 1-7C (Fragment)	1	14.98	2	493554	369565	626837	750232	88380	46665	75143	14833	40	28.2	26.8	4.4	-1.3	0.4	1.3	0.4	1.5	0.2	1.7	0.09	2	0.004	1.2	0.4	0.004
Q$287	D6RDC7	D6RDC7_MOUSE	Wdr61	WD repeat-containing protein 61	0.956	8.21	1	492616	507598	425365	521894	31811	42077	59565	44408	14.4	18.5	31.3	19	1	1	-1.2	0.8	1.1	0.9	-1.2	0.8	1	1	1.2	0.8	0.5
Q$482	G3X8V8	G3X8V8_MOUSE	Ripk3	Receptor-interacting serine-threonine kinase 3, isoform CRA_b	0.9719	4.12	1	490531	333736	515064	451974	47599	19757	27374	29452	21.7	13.2	11.9	14.6	-1.5	0.06	1.1	0.8	-1.1	0.8	1.5	0.004	1.4	0.05	-1.1	0.4	0.006
Q$1049	P35821	PTN1_MOUSE	Ptpn1	Tyrosine-protein phosphatase non-receptor type 1	0.9977	4.4	1	487221	310618	754631	897211	109775	87626	109920	63472	50.4	63.1	32.6	15.8	-1.6	0.4	1.5	0.3	1.8	0.06	2.4	0.06	2.9	0.004	1.2	0.4	0.002
Q$1371	Q3UEB3	PUF60_MOUSE	Puf60	Poly(U)-binding-splicing factor PUF60	0.9996	5.67	2	485684	425189	528141	614053	66498	37584	58381	63213	30.6	19.8	24.7	23	-1.1	0.7	1.1	0.7	1.3	0.6	1.2	0.6	1.4	0.2	1.2	0.7	0.2
Q$617	Q8BJY1	PSMD5_MOUSE	Psmd5	26S proteasome non-ATPase regulatory subunit 5	0.998	2.98	1	485266	457264	593040	1208525	101198	143795	181302	405938	46.6	70.3	68.4	75.1	-1.1	0.9	1.2	0.9	2.5	0.6	1.3	0.9	2.6	0.5	2	0.6	0.1
Q$1532	Q6P5F9	XPO1_MOUSE	Xpo1	Exportin-1	0.9995	3.17	2	482326	497533	710388	726382	69737	38580	61374	16282	32.3	17.3	19.3	5	1	1	1.5	0.1	1.5	0.09	1.4	0.09	1.5	0.004	1	1	0.004
Q$511	E9Q3V6	E9Q3V6_MOUSE	Sept2	Septin-2	1	9.03	2	479252	436136	506116	561034	32131	30915	23975	57795	15	15.9	10.6	23	-1.1	0.7	1.1	0.7	1.2	0.7	1.2	0.4	1.3	0.4	1.1	0.7	0.2
Q$70	A2AU61	A2AU61_MOUSE	Raly	RNA-binding protein Raly (Fragment)	1	23.7	4	478654	356511	559368	759575	77948	60058	74839	65863	36.4	37.7	29.9	19.4	-1.3	0.4	1.2	0.5	1.6	0.1	1.6	0.2	2.1	0.01	1.4	0.2	0.007
Q$1336	Q2TPA8	HSDL2_MOUSE	Hsdl2	Hydroxysteroid dehydrogenase-like protein 2	0.9874	2.24	1	475568	414816	521690	581496	107557	76061	83441	77868	50.6	41	35.8	29.9	-1.1	0.9	1.1	0.9	1.2	0.9	1.3	0.9	1.4	0.7	1.1	0.9	0.6
Q$242	D3Z285	D3Z285_MOUSE	Nfu1	NFU1 iron-sulfur cluster scaffold homolog, mitochondrial (Fragment)	0.9826	7.54	1	474497	390945	388352	531991	56897	16976	68645	48168	26.8	9.7	39.5	20.2	-1.2	0.6	-1.2	0.7	1.1	0.7	-1	1	1.4	0.1	1.4	0.5	0.2
Q$533	Q60715-2	P4HA1_MOUSE	P4ha	Isoform 2 of Prolyl 4-hydroxylase subunit alpha-1	1	7.12	3	473007	337441	480426	544242	94251	60957	48864	73339	44.6	40.4	22.7	30.1	-1.4	0.7	1	0.9	1.2	0.9	1.4	0.4	1.6	0.3	1.1	0.9	0.3
Q$642	G3UW70	G3UW70_MOUSE	Lamtor5	MCG21719	0.9879	13.79	1	465826	439042	467952	563181	57077	21174	23988	29559	27.4	10.8	11.5	11.7	-1.1	0.9	1	1	1.2	0.5	1.1	0.8	1.3	0.05	1.2	0.2	0.1
Q$77	Q08943-2	SSRP1_MOUSE	Ssrp	Isoform 2 of FACT complex subunit SSRP1	0.9014	2.1	1	463598	277509	667832	931907	101522	55624	94856	139660	49	44.8	31.8	33.5	-1.7	0.4	1.4	0.4	2	0.1	2.4	0.04	3.4	0.01	1.4	0.4	0.002
Q$89	D3YX28	D3YX28_MOUSE	Htra2	Serine protease HTRA2, mitochondrial	0.9989	3.6	1	459479	294844	653730	916950	123693	77671	79318	45786	60.2	58.9	27.1	11.2	-1.6	0.4	1.4	0.4	2	0.04	2.2	0.05	3.1	0.0007	1.4	0.06	0.0007
Q$1767	Q922Q1	MOSC2_MOUSE	Marc2	MOSC domain-containing protein 2, mitochondrial	0.9826	9.47	2	457773	414843	514625	565296	53110	49611	30307	38264	25.9	26.7	13.2	15.1	-1.1	0.7	1.1	0.7	1.2	0.5	1.2	0.5	1.4	0.2	1.1	0.7	0.1
Q$1610	Q8BJU0-2	SGTA_MOUSE	Sgt	Isoform 2 of Small glutamine-rich tetratricopeptide repeat-containing protein alpha	0.9989	7.32	2	455982	319447	512761	705749	62456	16394	47410	75997	30.6	11.5	20.7	24.1	-1.4	0.2	1.1	0.5	1.5	0.1	1.6	0.03	2.2	0.03	1.4	0.2	0.001
Q$116	B1ATI0	B1ATI0_MOUSE	Aldh3a2	Aldehyde dehydrogenase	0.9239	2.82	1	454786	346878	360622	442215	120023	72562	104473	55286	59	46.8	64.8	28	-1.3	1	-1.3	1	-1	1	1	1	1.3	0.9	1.2	1	0.8
Q$1500	Q64281-2	LIRB4_MOUSE	Lilrb	Isoform 2 of Leukocyte immunoglobulin-like receptor subfamily B member 4	0.9786	4.73	1	453481	431505	470326	492389	64218	50175	44274	75557	31.7	26	21	34.3	-1.1	1	1	1	1.1	1	1.1	1	1.1	1	1	1	0.9
Q$1719	Q8VDM6-3	HNRL1_MOUSE	Hnrnpul	Isoform 3 of Heterogeneous nuclear ribonucleoprotein U-like protein 1	0.9999	13.53	2	452705	450926	623336	636942	59419	57179	68311	61702	29.3	28.4	24.5	21.7	-1	1	1.4	0.3	1.4	0.3	1.4	0.3	1.4	0.3	1	1	0.07
Q$1290	P97377-2	CDK2_MOUSE	Cdk	Isoform CDK2-alpha of Cyclin-dependent kinase 2	0.9998	8.39	1	447295	342377	484887	480702	77691	63934	49300	58722	38.8	41.8	22.7	27.3	-1.3	0.8	1.1	1	1.1	1	1.4	0.5	1.4	0.6	-1	1	0.4
Q$627	F8WHP8	F8WHP8_MOUSE	Atp5j2	ATP synthase subunit f, mitochondrial	1	15.79	1	446952	444328	465278	460753	51832	75354	60470	55675	25.9	37.9	29.1	27	-1	1	1	1	1	1	1	1	1	1	-1	1	1
Q$2042	Q9QYF1	RDH11_MOUSE	Rdh11	Retinol dehydrogenase 11	1	4.11	1	446581	425710	375907	386499	50089	32347	44212	56017	25.1	17	26.3	32.4	-1	0.9	-1.2	0.9	-1.2	0.9	-1.1	0.9	-1.1	0.9	1	0.9	0.7
Q$1737	Q91VK2	Q91VK2_MOUSE	Eef1d	Eef1d protein	1	22.1	4	446541	326712	453539	694737	97309	67713	54254	104877	48.7	46.3	26.7	33.8	-1.4	0.6	1	1	1.6	0.4	1.4	0.5	2.1	0.1	1.5	0.3	0.04
Q$52	A2ALT5	A2ALT5_MOUSE	Ahcy	Adenosylhomocysteinase (Fragment)	1	11.58	1	445824	401041	472085	515803	64643	22240	52045	32763	32.4	12.4	24.7	14.2	-1.1	0.9	1.1	0.9	1.2	0.8	1.2	0.8	1.3	0.1	1.1	0.9	0.4
Q$1149	P59708	PM14_MOUSE	Sf3b14	Pre-mRNA branch site protein p14	0.9991	11.2	1	443837	336602	483055	628651	76063	73963	22761	54225	38.3	49.1	10.5	19.3	-1.3	0.6	1.1	0.6	1.4	0.3	1.4	0.3	1.9	0.08	1.3	0.2	0.03
Q$545	Q61768	KINH_MOUSE	Kif5b	Kinesin-1 heavy chain	0.9498	1.25	1	441574	282338	462024	660757	79607	52656	34850	81149	40.3	41.7	16.9	27.5	-1.6	0.2	1	0.8	1.5	0.2	1.6	0.1	2.3	0.03	1.4	0.2	0.008
Q$686	Q8CAY6	THIC_MOUSE	Acat2	Acetyl-CoA acetyltransferase, cytosolic	0.9999	22.67	3	439739	359412	433131	438589	54476	35663	41260	34470	27.7	22.2	21.3	17.6	-1.2	0.7	-1	1	-1	1	1.2	0.7	1.2	0.6	1	1	0.5
Q$1667	Q8CIH9	Q8CIH9_MOUSE	Ppat	Amidophosphoribosyltransferase	0.9455	3.29	1	432579	334079	379471	561524	56346	34283	47710	112426	29.1	22.9	28.1	44.8	-1.3	0.6	-1.1	0.7	1.3	0.7	1.1	0.7	1.7	0.5	1.5	0.6	0.2
Q$69	A2AU60	A2AU60_MOUSE	Raly	RNA-binding protein Raly (Fragment)	1	22.7	3	430538	320461	509162	709395	78793	58807	72920	63094	40.9	41	32	19.9	-1.3	0.5	1.2	0.5	1.6	0.1	1.6	0.3	2.2	0.01	1.4	0.3	0.008
Q$1894	Q9CYI4	LUC7L_MOUSE	Luc7l	Putative RNA-binding protein Luc7-like 1	0.9996	4.85	2	429058	303625	423917	676608	99326	52666	59271	105361	51.8	38.8	31.3	34.8	-1.4	0.5	-1	1	1.6	0.4	1.4	0.4	2.2	0.08	1.6	0.3	0.04
Q$1567	Q7TS72	IP3KC_MOUSE	Itpkc	Inositol-trisphosphate 3-kinase C	0.9554	3.69	1	426969	275538	502915	700579	97402	54213	81033	66059	51	44	36	21.1	-1.5	0.4	1.2	0.6	1.6	0.2	1.8	0.2	2.5	0.007	1.4	0.3	0.01
Q$1782	Q99JR8-2	SMRD2_MOUSE	Smarcd	Isoform 2 of SWI/SNF-related matrix-associated actin-dependent regulator of chromatin subfamily D member 2	0.9996	6.2	2	424192	357471	480868	608626	72280	45182	55633	34698	38.1	28.3	25.9	12.7	-1.2	0.7	1.1	0.7	1.4	0.2	1.3	0.3	1.7	0.01	1.3	0.3	0.03
Q$1711	Q8VBZ3	CLPT1_MOUSE	Clptm1	Cleft lip and palate transmembrane protein 1 homolog	0.9548	4.22	1	424133	277095	395684	405135	63809	39824	42275	44354	33.6	32.1	23.9	24.5	-1.5	0.3	-1.1	1	-1	1	1.4	0.3	1.5	0.3	1	1	0.2
Q$616	F7B7L8	F7B7L8_MOUSE	Psmd3	26S proteasome non-ATPase regulatory subunit 3 (Fragment)	1	12.16	2	423006	323506	354263	533403	69662	33944	34509	27303	36.8	23.5	21.8	11.4	-1.3	0.6	-1.2	0.6	1.3	0.5	1.1	0.6	1.6	0.008	1.5	0.02	0.02
Q$498	E9Q1G8	E9Q1G8_MOUSE	Sept7	Septin-7	0.9779	5.49	1	417546	287994	457718	669013	57291	47324	55407	53761	30.7	36.7	27.1	18	-1.4	0.2	1.1	0.6	1.6	0.06	1.6	0.1	2.3	0.004	1.5	0.1	0.001
Q$288	D6RDE2	D6RDE2_MOUSE	Fkbp4	Peptidyl-prolyl cis-trans isomerase	1	7.81	1	417206	453541	513016	593011	30087	43204	50551	120330	16.1	21.3	22	45.4	1.1	0.8	1.2	0.6	1.4	0.7	1.1	0.8	1.3	0.8	1.2	0.8	0.3
Q$1575	Q80X50-2	UBP2L_MOUSE	Ubap2	Isoform 2 of Ubiquitin-associated protein 2-like	0.978	2.37	2	414806	206746	431115	498295	74491	15921	53798	51235	40.2	17.2	27.9	23	-2	0.2	1	0.9	1.2	0.8	2.1	0.06	2.4	0.02	1.2	0.8	0.008
Q$2069	Q9WTR1	TRPV2_MOUSE	Trpv2	Transient receptor potential cation channel subfamily V member 2	0.93	1.85	1	414156	254877	354085	842694	86188	24059	66211	201752	46.5	21.1	41.8	53.5	-1.6	0.4	-1.2	0.6	2	0.3	1.4	0.4	3.3	0.2	2.4	0.2	0.01
Q$164	D3YU46	D3YU46_MOUSE	Gm10923	Protein Gm10923	1	18.95	2	412703	329672	384379	456692	47781	31088	20137	36839	25.9	21.1	11.7	18	-1.3	0.5	-1.1	0.7	1.1	0.7	1.2	0.5	1.4	0.2	1.2	0.5	0.1
Q$1533	Q6P8N8	Q6P8N8_MOUSE	Clpx	ATP-dependent Clp protease ATP-binding subunit clpX-like, mitochondrial	0.9986	2.1	1	405995	403234	414471	502144	126284	99238	100171	72066	69.6	55	54	32.1	-1	1	1	1	1.2	1	1	1	1.2	1	1.2	1	0.9
Q$492	G3X9I1	G3X9I1_MOUSE	Fam3c	DNA segment, Chr 6, Wayne State University 176, expressed, isoform CRA_a	0.9999	12.69	2	405848	335894	395318	511251	48251	34288	43011	48624	26.6	22.8	24.3	21.3	-1.2	0.6	-1	0.9	1.3	0.5	1.2	0.6	1.5	0.1	1.3	0.4	0.08
Q$563	F6Q2E3	F6Q2E3_MOUSE	Psmc3	26S protease regulatory subunit 6A (Fragment)	1	14.29	2	405073	283212	495358	601674	79730	44115	67401	55669	44	34.8	30.4	20.7	-1.4	0.5	1.2	0.5	1.5	0.3	1.7	0.1	2.1	0.01	1.2	0.5	0.02
Q$461	E9PWW2	E9PWW2_MOUSE	Tor1aip1	Torsin-1A-interacting protein 1	0.9997	7.16	2	401682	305185	431184	616522	82483	41350	57330	31836	45.9	30.3	29.7	11.5	-1.3	0.5	1.1	0.8	1.5	0.2	1.4	0.3	2	0.002	1.4	0.1	0.01
Q$1382	Q3UM45	PP1R7_MOUSE	Ppp1r7	Protein phosphatase 1 regulatory subunit 7	0.9999	4.99	2	401556	285047	507913	593973	60942	18485	52851	33182	33.9	14.5	23.3	12.5	-1.4	0.3	1.3	0.4	1.5	0.09	1.8	0.02	2.1	0.0002	1.2	0.4	0.001
Q$1872	Q9CRD2	EMC2_MOUSE	Emc2	ER membrane protein complex subunit 2	0.9089	4.04	1	401026	381925	446364	513756	83646	87674	102549	63755	46.6	51.3	51.4	27.7	-1.1	1	1.1	1	1.3	0.8	1.2	1	1.3	0.8	1.2	1	0.7
Q$746	L7N202	L7N202_MOUSE	Gm16477	Uncharacterized protein	1	7.89	2	400758	342350	502556	665955	78949	36868	69063	43961	44.1	24.1	30.7	14.8	-1.2	0.6	1.3	0.6	1.7	0.09	1.5	0.3	1.9	0.003	1.3	0.3	0.008
Q$272	D3Z6W9	D3Z6W9_MOUSE	Ndufb5	NADH dehydrogenase [ubiquinone] 1 beta subcomplex subunit 5, mitochondrial	0.9943	6.08	1	398394	279804	398884	440158	45007	44715	48350	46782	25.3	35.7	27.1	23.8	-1.4	0.4	1	1	1.1	0.9	1.4	0.4	1.6	0.2	1.1	0.9	0.1
Q$1538	Q6PF96	Q6PF96_MOUSE	Etfdh	Electron transfer flavoprotein-ubiquinone oxidoreductase, mitochondrial	0.9535	3.42	1	396693	344436	430039	492288	48645	53913	34700	54890	27.4	35	18	24.9	-1.2	0.7	1.1	0.7	1.2	0.7	1.2	0.7	1.4	0.4	1.1	0.7	0.2
Q$124	B1AWD8	B1AWD8_MOUSE	Clta	Clathrin light chain A	0.9751	2.97	1	396439	262320	523028	549318	113062	64125	75728	71770	63.8	54.7	32.4	29.2	-1.5	0.7	1.3	0.7	1.4	0.7	2	0.1	2.1	0.1	1.1	0.8	0.1
Q$293	D6RGN4	D6RGN4_MOUSE	Ndufv2	NADH dehydrogenase [ubiquinone] flavoprotein 2, mitochondrial (Fragment)	1	44.83	1	393068	304683	450343	666048	91154	52903	48450	48620	51.9	38.8	24.1	16.3	-1.3	0.7	1.1	0.7	1.7	0.1	1.5	0.2	2.2	0.006	1.5	0.07	0.006
Q$1916	Q9D103	IFM1_MOUSE	Ifitm1	Interferon-induced transmembrane protein 1	0.9884	15.09	1	392831	284039	364176	467952	55333	17833	81380	46410	31.5	14	50	22.2	-1.4	0.5	-1.1	0.8	1.2	0.8	1.3	0.8	1.6	0.04	1.3	0.8	0.2
Q$1925	Q9D1J3	SARNP_MOUSE	Sarnp	SAP domain-containing ribonucleoprotein	0.976	9.05	1	389406	332066	499453	532254	65843	41079	82248	77976	37.8	27.7	36.8	32.8	-1.2	0.7	1.3	0.7	1.4	0.6	1.5	0.4	1.6	0.3	1.1	0.8	0.2
Q$1707	Q8R502	LRC8C_MOUSE	Lrrc8c	Leucine-rich repeat-containing protein 8C	0.9628	1.74	1	386118	331958	588716	641198	101949	73558	75035	58186	59	49.5	28.5	20.3	-1.2	0.8	1.5	0.4	1.7	0.2	1.8	0.2	1.9	0.06	1.1	0.8	0.03
Q$795	O54941	SMCE1_MOUSE	Smarce1	SWI/SNF-related matrix-associated actin-dependent regulator of chromatin subfamily E member 1	0.9448	3.16	1	380870	299484	360711	396135	42904	42400	50001	39259	25.2	31.7	31	22.2	-1.3	0.7	-1.1	0.9	1	0.9	1.2	0.8	1.3	0.6	1.1	0.9	0.4
Q$258	D3Z4N9	D3Z4N9_MOUSE	Far1	Fatty acyl-CoA reductase 1 (Fragment)	1	5.8	1	378197	351112	393533	367972	18007	26283	35736	27408	10.6	16.7	20.3	16.7	-1.1	0.9	1	1	-1	1	1.1	0.9	1	1	-1.1	1	0.7
Q$1639	Q8BX10-2	PGAM5_MOUSE	Pgam	Isoform 2 of Serine/threonine-protein phosphatase PGAM5, mitochondrial	0.9216	4.18	1	377237	277410	440894	479983	81162	39799	46278	42358	48.1	32.1	23.5	19.7	-1.4	0.8	1.2	0.8	1.3	0.8	1.6	0.1	1.7	0.05	1.1	0.8	0.09
Q$631	F8WII3	F8WII3_MOUSE	Dpm1	Dolichol-phosphate mannosyltransferase (Fragment)	0.9998	11.57	1	376954	312106	326890	419668	44507	39514	46624	23782	26.4	28.3	31.9	12.7	-1.2	0.8	-1.2	0.8	1.1	0.8	1	0.8	1.3	0.3	1.3	0.5	0.2
Q$1886	Q9CXW2	RT22_MOUSE	Mrps22	28S ribosomal protein S22, mitochondrial	0.9976	3.34	1	376855	268716	333757	369966	74443	40964	40389	49824	44.2	34.1	27.1	30.1	-1.4	0.7	-1.1	0.9	-1	0.9	1.2	0.7	1.4	0.6	1.1	0.9	0.5
Q$1581	Q80Z19	MUC2_MOUSE	Muc2	Mucin-2 (Fragments)	0.9783	0.49	1	375876	428448	350792	1007136	102691	35580	33362	390717	61.1	18.6	21.3	86.7	1.1	0.9	-1.1	0.9	2.7	0.6	-1.2	0.6	2.4	0.6	2.9	0.6	0.1
Q$1648	Q8C5R8	Q8C5R8_MOUSE	Prps1l1	Protein Prps1l1	1	7.86	2	375189	322661	348507	436566	31663	30352	32747	40418	18.9	21	21	20.7	-1.2	0.7	-1.1	0.8	1.2	0.7	1.1	0.8	1.4	0.3	1.3	0.5	0.1
Q$97	D3Z1I3	D3Z1I3_MOUSE	Gm8325	MCG49525	1	11.56	2	374200	241288	386006	508763	70514	37659	22274	24932	42.1	34.9	12.9	11	-1.6	0.3	1	0.9	1.4	0.3	1.6	0.04	2.1	0.002	1.3	0.03	0.005
Q$1558	Q78XF5	OSTC_MOUSE	Ostc	Oligosaccharyltransferase complex subunit OSTC	0.9873	8.05	1	373879	260769	437371	386822	61663	27619	48315	26873	36.9	23.7	24.7	15.5	-1.4	0.4	1.2	0.8	1	0.9	1.7	0.07	1.5	0.07	-1.1	0.8	0.07
Q$1033	P32921-2	SYWC_MOUSE	War	Isoform 2 of Tryptophan--tRNA ligase, cytoplasmic	0.9826	3.58	1	373224	317272	370547	379991	40567	16908	31097	25954	24.3	11.9	18.8	15.3	-1.2	0.7	-1	1	1	1	1.2	0.6	1.2	0.4	1	1	0.4
Q$954	P17897	LYZ1_MOUSE	Lyz1	Lysozyme C-1	0.9816	16.89	1	373118	271070	440902	561473	68145	21654	47816	38461	40.8	17.9	24.3	15.3	-1.4	0.4	1.2	0.4	1.5	0.2	1.6	0.06	2.1	0.001	1.3	0.2	0.004
Q$1739	Q91VR5	DDX1_MOUSE	Ddx1	ATP-dependent RNA helicase DDX1	0.9508	1.49	1	372901	310623	345909	338649	43584	39365	45277	46901	26.1	28.3	29.3	31	-1.2	0.9	-1.1	1	-1.1	1	1.1	1	1.1	1	-1	1	0.8
Q$590	F6WP10	F6WP10_MOUSE	Fkbp8	Peptidyl-prolyl cis-trans isomerase FKBP8 (Fragment)	1	44.44	1	371630	285837	330352	409295	34160	14621	40382	32674	20.6	11.4	27.3	17.9	-1.3	0.2	-1.1	0.7	1.1	0.7	1.2	0.7	1.4	0.05	1.2	0.5	0.08
Q$1395	Q52KR3-6	PRUN2_MOUSE	Prune	Isoform 6 of Protein prune homolog 2	0.9909	0.69	1	371245	261216	489033	710360	54530	16057	55627	100586	32.8	13.7	25.4	31.7	-1.4	0.2	1.3	0.2	1.9	0.07	1.9	0.06	2.7	0.06	1.5	0.2	0.001
Q$1746	Q91XV3	BASP1_MOUSE	Basp1	Brain acid soluble protein 1	0.9331	13.72	1	370258	331986	396221	403888	48461	30452	27840	53686	29.3	20.5	15.7	29.7	-1.1	0.9	1.1	1	1.1	1	1.2	0.6	1.2	0.8	1	1	0.6
Q$521	E9Q5A0	E9Q5A0_MOUSE	Rpl13a	60S ribosomal protein L13a	1	5.44	2	368194	290213	391783	426571	57937	22272	41009	41301	35.2	17.2	23.4	21.6	-1.3	0.7	1.1	0.8	1.2	0.8	1.3	0.3	1.5	0.1	1.1	0.8	0.2
Q$845	P02798	MT2_MOUSE	Mt2	Metallothionein-2	0.9838	19.67	1	367186	380957	453413	896710	54984	58076	68874	208471	33.5	34.1	34	52	1	0.9	1.2	0.7	2.4	0.3	1.2	0.7	2.4	0.3	2	0.3	0.02
Q$1891	Q9CY64	BIEA_MOUSE	Blvra	Biliverdin reductase A	0.9961	4.75	1	365752	332952	435302	450248	51531	37616	45306	48691	31.5	25.3	23.3	24.2	-1.1	0.9	1.2	0.7	1.2	0.7	1.3	0.5	1.4	0.4	1	0.9	0.3
Q$247	D3Z3G6	D3Z3G6_MOUSE	Mapk3	Mitogen-activated protein kinase 3	0.9755	4.47	1	365579	288454	359768	763384	54870	17166	37484	251322	33.6	13.3	23.3	73.6	-1.3	0.6	-1	0.9	2.1	0.6	1.2	0.5	2.6	0.5	2.1	0.6	0.08
Q$1507	Q64514-2	TPP2_MOUSE	Tpp	Isoform Short of Tripeptidyl-peptidase 2	0.9591	2.16	1	364716	301093	486919	543871	72842	40123	62470	83842	44.7	29.8	28.7	34.5	-1.2	0.7	1.3	0.6	1.5	0.5	1.6	0.2	1.8	0.2	1.1	0.7	0.08
Q$209	Q3U125	Q3U125_MOUSE	Fam213a	Redox-regulatory protein FAM213A	0.9539	5.68	1	363849	350108	333360	343204	59740	30783	26652	47314	36.7	19.7	17.9	30.8	-1	1	-1.1	1	-1.1	1	-1.1	1	-1	1	1	1	1
Q$1221	P63005	LIS1_MOUSE	Pafah1b1	Platelet-activating factor acetylhydrolase IB subunit alpha	0.996	5.12	1	363486	350230	344130	437313	31639	41585	54379	60566	19.5	26.6	35.3	31	-1	1	-1.1	1	1.2	0.8	-1	1	1.2	0.8	1.3	0.8	0.5
Q$2004	Q9ES46	PARVB_MOUSE	Parvb	Beta-parvin	0.9077	3.84	1	362020	293828	468409	477970	54992	40517	17373	31167	34	30.8	8.3	14.6	-1.2	0.6	1.3	0.4	1.3	0.4	1.6	0.02	1.6	0.03	1	0.8	0.01
Q$1479	Q62241	RU1C_MOUSE	Snrpc	U1 small nuclear ribonucleoprotein C	0.9914	13.21	1	358468	334518	387784	566386	45339	54277	32289	134842	28.3	36.3	18.6	53.2	-1.1	0.8	1.1	0.8	1.6	0.6	1.2	0.8	1.7	0.6	1.5	0.7	0.2
Q$526	E9Q5L3	E9Q5L3_MOUSE	Acadsb	Short/branched chain-specific acyl-CoA dehydrogenase, mitochondrial	1	7.53	2	357476	309854	418415	675632	57850	81798	76036	159909	36.2	59	40.6	52.9	-1.2	0.8	1.2	0.8	1.9	0.4	1.4	0.7	2.2	0.4	1.6	0.6	0.09
Q$67	Q9CZ44-3	NSF1C_MOUSE	Nsfl1	Isoform 3 of NSFL1 cofactor p47	0.9999	10.22	2	352798	282149	344694	425430	30770	23898	20757	13671	19.5	18.9	13.5	7.2	-1.3	0.2	-1	0.8	1.2	0.2	1.2	0.2	1.5	0.005	1.2	0.06	0.005
Q$130	B1AYQ0	B1AYQ0_MOUSE	Rsu1	Ras suppressor protein 1 (Fragment)	1	10.71	1	352018	173008	492970	647310	94709	39323	56819	93654	60.2	50.8	25.8	32.4	-2	0.3	1.4	0.4	1.8	0.2	2.8	0.01	3.7	0.01	1.3	0.4	0.003
Q$1176	P62141	PP1B_MOUSE	Ppp1cb	Serine/threonine-protein phosphatase PP1-beta catalytic subunit	1	16.51	3	351707	322333	338570	392375	28046	18904	18105	23670	17.8	13.1	12	13.5	-1.1	0.8	-1	0.8	1.1	0.8	1.1	0.8	1.2	0.3	1.2	0.4	0.2
Q$263	D3Z5B1	D3Z5B1_MOUSE	2410018M08Rik	Protein 2410018M08Rik (Fragment)	1	20.11	2	350506	313615	355905	391318	50972	44581	49706	41901	32.5	31.8	31.2	23.9	-1.1	1	1	1	1.1	1	1.1	1	1.2	0.8	1.1	1	0.7
Q$1818	Q99MZ6	MYO7B_MOUSE	Myo7b	Unconventional myosin-VIIb	0.9566	0.95	1	349045	322662	563262	656572	44417	38138	193382	192898	28.5	26.4	76.8	65.7	-1.1	0.9	1.6	0.7	1.9	0.6	1.7	0.7	2	0.6	1.2	0.9	0.3
Q$1631	Q8BTW3	EXOS6_MOUSE	Exosc6	Exosome complex component MTR3	0.9933	5.86	1	347514	277682	373705	428884	63148	26445	107010	37239	40.6	21.3	64	19.4	-1.3	0.8	1.1	0.9	1.2	0.8	1.3	0.8	1.5	0.06	1.1	0.9	0.5
Q$1389	Q3UZ39-3	LRRF1_MOUSE	Lrrfip	Isoform 3 of Leucine-rich repeat flightless-interacting protein 1	0.9989	6.33	1	347482	183293	443048	553587	86503	37218	43712	48530	55.7	45.4	22.1	19.6	-1.9	0.3	1.3	0.4	1.6	0.3	2.4	0.01	3	0.002	1.2	0.3	0.002
Q$1981	Q9DCF9-2	SSRG_MOUSE	Ssr	Isoform 2 of Translocon-associated protein subunit gamma	0.9775	7.82	1	346771	319789	410327	503990	57721	40088	43675	40895	37.2	28	23.8	18.1	-1.1	0.7	1.2	0.6	1.5	0.3	1.3	0.5	1.6	0.07	1.2	0.5	0.05
Q$813	O70591	PFD2_MOUSE	Pfdn2	Prefoldin subunit 2	0.9797	7.79	1	346202	303244	309332	450639	38320	28533	12299	40907	24.8	21	8.9	20.3	-1.1	0.8	-1.1	0.8	1.3	0.3	1	0.8	1.5	0.1	1.5	0.1	0.02
Q$459	E9PWD0	E9PWD0_MOUSE	Ap2a1	AP-2 complex subunit alpha-1	1	26.32	1	345989	251470	395862	478735	78746	48741	43003	40466	50.9	43.3	24.3	18.9	-1.4	0.6	1.1	0.6	1.4	0.5	1.6	0.3	1.9	0.04	1.2	0.5	0.06
Q$175	D3YV67	D3YV67_MOUSE	Tmem165	Transmembrane protein 165 (Fragment)	0.9677	20	1	344725	328881	361603	442609	32234	41933	32778	24602	20.9	28.5	20.3	12.4	-1	0.9	1	0.9	1.3	0.2	1.1	0.9	1.3	0.2	1.2	0.3	0.1
Q$581	Q9R0Q3	TMED2_MOUSE	Tmed2	Transmembrane emp24 domain-containing protein 2	1	10.95	2	341047	260783	324223	532673	71762	31073	35701	146489	47.1	26.6	24.6	61.5	-1.3	0.7	-1.1	0.8	1.6	0.7	1.2	0.7	2	0.6	1.6	0.7	0.2
Q$851	P04202	TGFB1_MOUSE	Tgfb1	Transforming growth factor beta-1	1	5.13	1	340777	269845	304548	318632	44393	26123	26148	44889	29.1	21.6	19.2	31.5	-1.3	0.7	-1.1	0.9	-1.1	0.9	1.1	0.9	1.2	0.9	1	0.9	0.6
Q$516	E9Q4B5	E9Q4B5_MOUSE	Ccdc58	Coiled-coil domain-containing protein 58	0.9615	14.71	1	340291	288633	274524	376573	26275	21112	11379	60208	17.3	16.4	9.3	35.8	-1.2	0.6	-1.2	0.3	1.1	0.8	-1.1	0.8	1.3	0.6	1.4	0.6	0.2
Q$75	Q3UHC7-2	DAB2P_MOUSE	Dab2i	Isoform 2 of Disabled homolog 2-interacting protein	0.9814	9.2	2	333948	353091	437556	381032	40327	27010	47053	64618	27	17.1	24	37.9	1.1	0.9	1.3	0.6	1.1	0.9	1.2	0.6	1.1	0.9	-1.1	0.9	0.4
Q$1537	Q6PEB6	PHOCN_MOUSE	Mob4	MOB-like protein phocein	0.9413	13.33	1	333153	295796	477733	519394	57224	25601	54376	27019	38.4	19.4	25.5	11.6	-1.1	0.8	1.4	0.3	1.6	0.08	1.6	0.08	1.8	0.002	1.1	0.8	0.005
Q$1728	Q8VI75	IPO4_MOUSE	Ipo4	Importin-4	0.9305	1.02	1	332600	222626	372738	533870	72848	37550	53553	55349	49	37.7	32.1	23.2	-1.5	0.4	1.1	0.7	1.6	0.2	1.7	0.2	2.4	0.01	1.4	0.2	0.01
Q$1361	Q3U1J4	DDB1_MOUSE	Ddb1	DNA damage-binding protein 1	0.9999	2.63	1	332206	291407	350305	417956	36555	13909	49935	41816	24.6	10.7	31.9	22.4	-1.1	0.8	1.1	0.8	1.3	0.6	1.2	0.8	1.4	0.1	1.2	0.8	0.2
Q$1948	Q9D880	TIM50_MOUSE	Timm50	Mitochondrial import inner membrane translocase subunit TIM50	0.9773	3.12	1	331028	258950	349406	370160	47695	33515	37154	23948	32.2	28.9	23.8	14.5	-1.3	0.7	1.1	0.9	1.1	0.9	1.3	0.4	1.4	0.2	1.1	0.9	0.2
Q$500	E9Q1P8	I2BP2_MOUSE	Irf2bp2	Interferon regulatory factor 2-binding protein 2	0.95	2.63	1	329194	259196	357598	401165	40112	44301	15904	36591	27.2	38.2	9.9	20.4	-1.3	0.6	1.1	0.6	1.2	0.6	1.4	0.3	1.5	0.2	1.1	0.6	0.08
Q$1403	Q5SUF2-2	LC7L3_MOUSE	Luc7l	Isoform 2 of Luc7-like protein 3	0.9986	7.74	2	327250	215011	343298	405735	28659	28833	61737	57010	19.6	30	40.2	31.4	-1.5	0.1	1	0.8	1.2	0.6	1.6	0.3	1.9	0.1	1.2	0.7	0.07
Q$570	F6RJ83	F6RJ83_MOUSE	Ndufs2	NADH dehydrogenase [ubiquinone] iron-sulfur protein 2, mitochondrial (Fragment)	1	9.24	2	326091	291282	394922	437549	31744	45702	36027	42392	21.8	35.1	20.4	21.7	-1.1	0.7	1.2	0.5	1.3	0.3	1.4	0.4	1.5	0.3	1.1	0.7	0.07
Q$1405	Q5SUS9	Q5SUS9_MOUSE	Ewsr1	RNA-binding protein EWS	0.9997	2.57	1	322502	198605	366928	484068	65282	35620	53465	45956	45.3	40.1	32.6	21.2	-1.6	0.4	1.1	0.6	1.5	0.3	1.8	0.1	2.4	0.007	1.3	0.4	0.01
Q$483	E9PZS8	E9PZS8_MOUSE	Cox7a2l	Cytochrome c oxidase subunit 7A-related protein, mitochondrial	0.9998	33.58	2	322075	282408	302691	394025	28532	36015	11447	57179	19.8	28.5	8.5	32.4	-1.1	0.8	-1.1	0.8	1.2	0.7	1.1	0.8	1.4	0.6	1.3	0.6	0.2
Q$253	D3Z4I5	D3Z4I5_MOUSE	Dnajc8	DnaJ homolog subfamily C member 8	0.9997	34.12	1	321835	206469	384368	521770	56661	31690	19222	27298	39.4	34.3	11.2	11.7	-1.6	0.2	1.2	0.3	1.6	0.04	1.9	0.007	2.5	0.0004	1.4	0.01	0.0002
Q$775	O35226-2	PSMD4_MOUSE	Psmd	Isoform Rpn10B of 26S proteasome non-ATPase regulatory subunit 4	1	7.39	2	321708	231515	308092	383485	49198	23687	37713	31178	34.2	22.9	27.4	18.2	-1.4	0.5	-1	0.8	1.2	0.5	1.3	0.5	1.7	0.03	1.2	0.5	0.07
Q$1722	Q8VDP4	CCAR2_MOUSE	Ccar2	Cell cycle and apoptosis regulator protein 2	0.9232	1.63	1	320899	228496	293258	523757	61898	54192	17861	46698	43.1	53	13.6	19.9	-1.4	0.6	-1.1	0.7	1.6	0.1	1.3	0.6	2.3	0.02	1.8	0.01	0.003
Q$1650	Q8C6I2-2	SDHF2_MOUSE	Sdhaf	Isoform 2 of Succinate dehydrogenase assembly factor 2, mitochondrial	0.9035	10.45	1	320010	274761	360829	340693	81390	51346	48419	50332	56.9	41.8	30	33	-1.2	1	1.1	1	1.1	1	1.3	0.8	1.2	0.9	-1.1	1	0.8
Q$57	A2AN81	A2AN81_MOUSE	Dkc1	H/ACA ribonucleoprotein complex subunit 4 (Fragment)	0.9999	9.66	1	317936	334823	498174	509903	18439	69652	91719	71730	13	46.5	41.2	31.5	1.1	1	1.6	0.5	1.6	0.3	1.5	0.5	1.5	0.5	1	1	0.1
Q$735	P48024	EIF1_MOUSE	Eif1	Eukaryotic translation initiation factor 1	0.9481	21.24	1	317758	289749	306437	343217	15178	20034	24427	31473	10.7	15.5	17.8	20.5	-1.1	0.8	-1	0.9	1.1	0.9	1.1	0.9	1.2	0.7	1.1	0.9	0.5
Q$2001	Q9ERN0	SCAM2_MOUSE	Scamp2	Secretory carrier-associated membrane protein 2	0.9373	3.65	1	316840	250204	287371	388534	41794	31699	59737	41099	29.5	28.3	46.5	23.7	-1.3	0.7	-1.1	0.8	1.2	0.7	1.1	0.8	1.6	0.2	1.4	0.7	0.2
Q$273	D3Z765	D3Z765_MOUSE	Luc7l	Putative RNA-binding protein Luc7-like 1 (Fragment)	0.9996	5.81	1	315969	194664	278708	542928	78318	39773	37135	93889	55.4	45.7	29.8	38.7	-1.6	0.4	-1.1	0.7	1.7	0.3	1.4	0.4	2.8	0.05	1.9	0.1	0.01
Q$103	B0QZN5	B0QZN5_MOUSE	Vamp2	Vesicle-associated membrane protein 2	0.9999	14.72	1	307662	289993	303334	379127	24596	18739	17769	35269	17.9	14.4	13.1	20.8	-1.1	0.9	-1	0.9	1.2	0.4	1	0.9	1.3	0.3	1.2	0.4	0.09
Q$1651	Q8C7X2-2	EMC1_MOUSE	Emc	Isoform 2 of ER membrane protein complex subunit 1	0.9992	1.81	1	306069	238693	297780	458187	61576	31082	36794	70775	45	29.1	27.6	34.5	-1.3	0.6	-1	0.9	1.5	0.5	1.2	0.6	1.9	0.1	1.5	0.3	0.05
Q$1754	Q91Z98	CH3L4_MOUSE	Chi3l4	Chitinase-3-like protein 4	1	4.23	1	303397	282133	244832	366728	47715	44112	14611	89477	35.2	35	13.3	54.6	-1.1	0.9	-1.2	0.8	1.2	0.9	-1.2	0.9	1.3	0.9	1.5	0.8	0.5
Q$1991	Q9EP69	SAC1_MOUSE	Sacm1l	Phosphatidylinositide phosphatase SAC1	0.9954	1.7	1	302713	240403	281722	368936	87481	37371	66455	41983	64.6	34.8	52.7	25.4	-1.3	0.9	-1.1	0.9	1.2	0.9	1.2	0.9	1.5	0.3	1.3	0.8	0.5
Q$638	G3UVU2	G3UVU2_MOUSE	Sf3a2	Splicing factor 3A subunit 2	0.9852	3.71	1	300906	293937	247515	576827	49889	78630	42048	241357	37.1	59.8	38	93.6	-1	0.9	-1.2	0.8	1.9	0.8	-1.2	0.9	2	0.8	2.3	0.8	0.3
Q$245	Q80XN0	BDH_MOUSE	Bdh1	D-beta-hydroxybutyrate dehydrogenase, mitochondrial	0.9991	9.04	2	299178	281424	406039	452033	28311	21931	64276	32925	21.2	17.4	35.4	16.3	-1.1	0.8	1.4	0.4	1.5	0.04	1.4	0.4	1.6	0.02	1.1	0.8	0.02
Q$1611	Q8BJW6-2	EIF2A_MOUSE	Eif2	Isoform 2 of Eukaryotic translation initiation factor 2A	0.9808	5.75	2	296843	246974	299689	395839	47052	32383	35642	52025	35.4	29.3	26.6	29.4	-1.2	0.7	1	1	1.3	0.6	1.2	0.7	1.6	0.2	1.3	0.6	0.1
Q$542	Q9JLV6-2	PNKP_MOUSE	Pnk	Isoform 2 of Bifunctional polynucleotide phosphatase/kinase	0.9293	2.42	1	296392	186725	250040	414270	60934	32575	41035	57469	46	39	36.7	31	-1.6	0.5	-1.2	0.5	1.4	0.5	1.3	0.5	2.2	0.05	1.7	0.2	0.03
Q$872	P08122	CO4A2_MOUSE	Col4a2	Collagen alpha-2(IV) chain	0.9132	1.29	1	295126	319928	402312	330007	34821	52584	70747	32564	26.4	36.8	39.3	22.1	1.1	0.9	1.4	0.8	1.1	0.9	1.3	0.9	1	0.9	-1.2	0.9	0.5
Q$553	E9QB02	E9QB02_MOUSE	Mars	Methionine--tRNA ligase, cytoplasmic	0.9796	1.43	1	294838	226416	375288	644684	50469	46964	52295	99844	38.3	46.4	31.2	34.6	-1.3	0.5	1.3	0.5	2.2	0.07	1.7	0.2	2.8	0.03	1.7	0.2	0.002
Q$1036	P34960	MMP12_MOUSE	Mmp12	Macrophage metalloelastase	0.9959	2.54	1	293164	258089	371442	366239	36119	34649	113928	35786	27.5	30	68.6	21.8	-1.1	0.9	1.3	0.9	1.2	0.6	1.4	0.9	1.4	0.3	-1	1	0.5
Q$576	F6TPX8	F6TPX8_MOUSE	Ap2a1	AP-2 complex subunit alpha-1 (Fragment)	1	8.83	1	292090	224864	328810	364026	21203	47479	36668	39424	16.2	47.2	24.9	24.2	-1.3	0.5	1.1	0.7	1.2	0.5	1.5	0.5	1.6	0.3	1.1	0.7	0.09
Q$739	Q99KP6-2	PRP19_MOUSE	Prpf1	Isoform 2 of Pre-mRNA-processing factor 19	1	6.5	2	290880	261371	374051	526221	71892	54933	70143	110464	55.3	47	41.9	46.9	-1.1	0.8	1.3	0.7	1.8	0.4	1.4	0.7	2	0.3	1.4	0.7	0.1
Q$53	A2AM62	A2AM62_MOUSE	Hp1bp3	Heterochromatin protein 1-binding protein 3 (Fragment)	1	6.06	1	290788	281911	351064	351424	26896	44487	12447	40432	20.7	35.3	7.9	25.7	-1	1	1.2	0.4	1.2	0.7	1.2	0.7	1.2	0.7	1	1	0.3
Q$1160	P61028	RAB8B_MOUSE	Rab8b	Ras-related protein Rab-8B	1	12.56	2	290138	305104	350503	331072	46399	26365	36770	27664	35.8	19.3	23.5	18.7	1.1	0.9	1.2	0.9	1.1	0.9	1.1	0.9	1.1	0.9	-1.1	0.9	0.6
Q$1174	P62077	TIM8B_MOUSE	Timm8b	Mitochondrial import inner membrane translocase subunit Tim8 B	0.9713	13.25	1	289895	260880	274941	309728	30062	30674	32132	45267	23.2	26.3	26.1	32.7	-1.1	1	-1.1	1	1.1	1	1.1	1	1.2	1	1.1	1	0.8
Q$171	D3YUM8	D3YUM8_MOUSE	Gm4950	Proteasome subunit beta type	1	7.8	1	287872	284375	321051	340482	47148	37806	56463	42369	36.6	29.7	39.3	27.8	-1	1	1.1	1	1.2	0.9	1.1	1	1.2	0.9	1.1	1	0.8
Q$672	G3UZL6	G3UZL6_MOUSE	Ube2i	SUMO-conjugating enzyme UBC9	1	30.69	2	284474	222962	330196	471201	29555	26776	29950	26384	23.2	26.9	20.3	12.5	-1.3	0.3	1.2	0.3	1.7	0.008	1.5	0.08	2.1	0.001	1.4	0.03	0.0001
Q$45	A2AIW9	A2AIW9_MOUSE	Pmpca	Mitochondrial-processing peptidase subunit alpha	1	9.52	2	282705	206650	310895	644207	26187	14933	27381	204394	20.7	16.2	19.7	70.9	-1.4	0.2	1.1	0.5	2.3	0.4	1.5	0.06	3.1	0.3	2.1	0.4	0.04
Q$31	Q6PGJ3	Q6PGJ3_MOUSE	L1cam	L1 cell adhesion molecule	0.9413	0.79	1	281340	210756	272617	407479	54787	37951	40781	58687	43.5	40.3	33.4	32.2	-1.3	0.7	-1	0.9	1.4	0.5	1.3	0.7	1.9	0.1	1.5	0.4	0.07
Q$506	E9Q242	E9Q242_MOUSE	Adsl	Adenylosuccinate lyase	0.9119	4.69	1	280558	237067	400134	358109	40974	38664	64048	21655	32.7	36.5	35.8	13.5	-1.2	0.7	1.4	0.4	1.3	0.4	1.7	0.3	1.5	0.1	-1.1	0.7	0.07
Q$233	Q62393-2	TPD52_MOUSE	Tpd5	Isoform 2 of Tumor protein D52	1	17.84	2	279940	204942	327116	346968	71028	25771	24006	30370	56.7	28.1	16.4	19.6	-1.4	0.8	1.2	0.8	1.2	0.8	1.6	0.04	1.7	0.04	1.1	0.8	0.1
Q$1833	Q9CPT5	NOP16_MOUSE	Nop16	Nucleolar protein 16	0.9997	8.99	1	277649	297053	384230	639947	28050	55834	34711	86015	22.6	42	20.2	30.1	1.1	0.8	1.4	0.1	2.3	0.02	1.3	0.4	2.2	0.05	1.7	0.1	0.001
Q$251	D3Z4A2	D3Z4A2_MOUSE	Hmox2	Heme oxygenase 2 (Fragment)	1	18.46	1	277615	269762	257014	303979	27341	42674	34576	17576	22	35.4	30.1	12.9	-1	1	-1.1	1	1.1	0.9	-1	1	1.1	0.9	1.2	0.8	0.8
Q$1687	Q8K482	EMIL2_MOUSE	Emilin2	EMILIN-2	0.9939	1.21	1	275800	135179	325898	440213	43282	15086	26331	20559	35.1	25	18.1	10.4	-2	0.04	1.2	0.4	1.6	0.04	2.4	0.001	3.3	1e-05	1.4	0.04	1e-05
Q$1341	Q3TDN2-2	FAF2_MOUSE	Faf	Isoform 2 of FAS-associated factor 2	0.9543	3.99	1	275672	253445	381128	334747	50042	37725	36222	47232	40.6	33.3	21.3	31.6	-1.1	0.8	1.4	0.5	1.2	0.8	1.5	0.2	1.3	0.6	-1.1	0.8	0.2
Q$485	E9Q035	E9Q035_MOUSE	Gm20425	Protein Gm20425	0.975	1.33	1	271591	227995	230978	333195	37582	37603	36660	49893	30.9	36.9	35.5	33.5	-1.2	0.8	-1.2	0.8	1.2	0.8	1	1	1.5	0.6	1.4	0.6	0.3
Q$440	P23506-2	PIMT_MOUSE	Pcmt	Isoform 2 of Protein-L-isoaspartate(D-aspartate) O-methyltransferase	0.9843	14.91	1	271415	179036	252120	247794	40765	22409	24076	25477	33.6	28	21.4	23	-1.5	0.3	-1.1	1	-1.1	1	1.4	0.3	1.4	0.3	-1	1	0.2
Q$651	G3UWW7	G3UWW7_MOUSE	Psmd11	26S proteasome non-ATPase regulatory subunit 11 (Fragment)	1	7.59	1	265425	334461	253129	366619	16658	91602	41349	77688	14	61.2	36.5	47.4	1.3	0.9	-1	1	1.4	0.8	-1.3	0.9	1.1	1	1.4	0.8	0.6
Q$12	A2A6J4	A2A6J4_MOUSE	Lsp1	Lymphocyte-specific protein 1	1	12.42	3	261955	229884	233409	303126	34680	23601	23814	30770	29.6	23	22.8	22.7	-1.1	0.9	-1.1	0.9	1.2	0.9	1	0.9	1.3	0.5	1.3	0.5	0.3
Q$611	F6ZKZ3	F6ZKZ3_MOUSE	Sqrdl	Sulfide:quinone oxidoreductase, mitochondrial	1	4.67	1	260047	301106	321617	405947	55295	35486	66437	56740	47.5	26.4	46.2	31.3	1.2	0.9	1.2	0.9	1.6	0.5	1.1	0.9	1.3	0.6	1.3	0.8	0.3
Q$663	G3UZN1	G3UZN1_MOUSE	Ddt	D-dopachrome decarboxylase	0.9994	16.44	1	258830	200070	208272	255582	30160	19887	23201	38726	26.1	22.2	24.9	33.9	-1.3	0.6	-1.2	0.7	-1	1	1	1	1.3	0.7	1.2	0.7	0.4
Q$1603	Q9QXE7	TBL1X_MOUSE	Tbl1x	F-box-like/WD repeat-containing protein TBL1X	0.9417	5.31	1	258552	181670	309110	348915	26230	30740	25760	46513	22.7	37.8	18.6	29.8	-1.4	0.3	1.2	0.4	1.3	0.3	1.7	0.08	1.9	0.08	1.1	0.5	0.02
Q$607	F6ZFB8	F6ZFB8_MOUSE	Tcirg1	Protein Tcirg1 (Fragment)	0.9999	17.58	1	258061	265764	257017	301887	46613	50490	43317	38507	40.4	42.5	37.7	28.5	1	1	-1	1	1.2	1	-1	1	1.1	1	1.2	1	0.9
Q$1523	Q6IRU5-2	CLCB_MOUSE	Clt	Isoform 2 of Clathrin light chain B	0.9372	4.74	1	255246	189195	387301	458821	56977	37053	69777	49826	49.9	43.8	40.3	24.3	-1.3	0.6	1.5	0.5	1.8	0.1	2	0.1	2.4	0.01	1.2	0.6	0.01
Q$550	E9QAX7	E9QAX7_MOUSE	Cse1l	Exportin-2	0.9554	3.61	1	253930	217604	233684	252240	22967	12172	9886	10403	20.2	12.5	9.5	9.2	-1.2	0.7	-1.1	0.7	-1	0.9	1.1	0.7	1.2	0.3	1.1	0.7	0.3
Q$9	A2A6F8	A2A6F8_MOUSE	Rpl23	60S ribosomal protein L23 (Fragment)	1	33.33	1	253463	206364	289755	323996	42952	32040	27479	48422	37.9	34.7	21.2	33.4	-1.2	0.8	1.1	0.8	1.3	0.8	1.4	0.4	1.6	0.4	1.1	0.8	0.2
Q$634	P39054-2	DYN2_MOUSE	Dnm	Isoform 2 of Dynamin-2	0.9996	3.35	1	253244	176996	303890	481351	46628	25565	27946	46357	41.2	32.3	20.6	21.5	-1.4	0.3	1.2	0.4	1.9	0.04	1.7	0.04	2.7	0.003	1.6	0.04	0.0003
Q$1838	Q9CQ01	RNT2_MOUSE	Rnaset2	Ribonuclease T2	0.9369	6.18	1	247763	188863	342743	352494	80651	28163	56167	38696	72.8	33.3	36.6	24.5	-1.3	0.8	1.4	0.7	1.4	0.7	1.8	0.2	1.9	0.05	1	0.9	0.1
Q$224	Q9JIF0-2	ANM1_MOUSE	Prmt	Isoform 2 of Protein arginine N-methyltransferase 1	0.9381	3.68	1	247538	207362	269456	241014	54601	47623	56070	17954	49.3	51.4	46.5	16.7	-1.2	1	1.1	1	-1	1	1.3	1	1.2	1	-1.1	1	0.8
Q$847	P03930	ATP8_MOUSE	Mtatp8	ATP synthase protein 8	0.9872	14.93	1	247019	184732	214890	252900	49054	24493	30979	19104	44.4	29.6	32.2	16.9	-1.3	0.8	-1.1	0.8	1	0.9	1.2	0.8	1.4	0.3	1.2	0.8	0.5
Q$584	F6VVY4	F6VVY4_MOUSE	Slc25a1	Protein Slc25a1 (Fragment)	1	6.09	1	245248	245435	285945	295250	40095	16477	37872	25817	36.6	15	29.6	19.6	1	1	1.2	0.9	1.2	0.9	1.2	0.9	1.2	0.6	1	1	0.6
Q$1899	Q9CZ44-2	NSF1C_MOUSE	Nsfl1	Isoform 2 of NSFL1 cofactor p47	0.9999	5.68	1	244775	218757	224245	267407	18257	11913	14494	11729	16.7	12.2	14.5	9.8	-1.1	0.7	-1.1	0.7	1.1	0.7	1	0.8	1.2	0.1	1.2	0.2	0.1
Q$294	D6RHS6	D6RHS6_MOUSE	Pebp1	Phosphatidylethanolamine-binding protein 1	1	9.56	1	243887	198466	217431	256705	33614	14136	12697	25048	30.8	15.9	13.1	21.8	-1.2	0.7	-1.1	0.7	1.1	0.8	1.1	0.7	1.3	0.4	1.2	0.7	0.3
Q$1583	Q811W0	SOX21_MOUSE	Sox21	Transcription factor SOX-21	0.922	17.03	1	243876	195141	249543	279206	41014	17376	27932	2493	37.6	19.9	25	2	-1.2	0.8	1	0.9	1.1	0.8	1.3	0.5	1.4	0.05	1.1	0.8	0.2
Q$154	Q8CI59-2	STEA3_MOUSE	Steap	Isoform 2 of Metalloreductase STEAP3	0.9997	5.32	2	241950	408866	213415	3018309	30523	230918	26909	2078180	28.2	126.3	28.2	154	1.7	0.8	-1.1	0.8	12.5	0.8	-1.9	0.8	7.4	0.8	14.1	0.8	0.2
Q$2035	Q9QXK3-3	COPG2_MOUSE	Copg	Isoform 3 of Coatomer subunit gamma-2	1	3.14	1	241069	209804	260100	339626	48516	34887	21146	40900	45	37.2	18.2	26.9	-1.1	0.9	1.1	0.9	1.4	0.5	1.2	0.6	1.6	0.2	1.3	0.5	0.1
Q$600	F6YFR7	F6YFR7_MOUSE	Cope	Coatomer subunit epsilon (Fragment)	0.9999	13.68	2	240806	230072	228956	280215	36363	27931	17452	17926	33.8	27.1	17	14.3	-1	1	-1.1	1	1.2	0.8	-1	1	1.2	0.6	1.2	0.4	0.5
Q$766	O09048	O09048_MOUSE	Krtap6-1	Glycine tyrosine-rich hair keratin protein	0.9994	17.95	1	240618	225287	254019	331450	37894	41162	39019	57257	35.2	40.9	34.3	38.6	-1.1	1	1.1	1	1.4	0.7	1.1	0.9	1.5	0.7	1.3	0.8	0.4
Q$88	A2CF80	A2CF80_MOUSE	0610010K14Rik	Protein 0610010K14Rik	0.9619	27.45	1	239796	219112	287447	293146	29250	35272	46670	42251	27.3	36	36.3	32.2	-1.1	0.9	1.2	0.8	1.2	0.8	1.3	0.8	1.3	0.8	1	0.9	0.5
Q$717	H3BLH2	H3BLH2_MOUSE	Sqrdl	Sulfide:quinone oxidoreductase, mitochondrial (Fragment)	1	7.25	1	237593	175439	233612	222162	46848	28880	38228	31075	44.1	36.8	36.6	31.3	-1.4	0.8	-1	1	-1.1	1	1.3	0.8	1.3	0.8	-1.1	1	0.6
Q$970	P68404-2	KPCB_MOUSE	Prkc	Isoform Beta-II of Protein kinase C beta type	0.9745	1.78	1	236617	212497	301068	273192	22061	33138	31352	35499	20.8	34.9	23.3	29.1	-1.1	0.8	1.3	0.5	1.2	0.8	1.4	0.4	1.3	0.7	-1.1	0.8	0.2
Q$995	P26350	PTMA_MOUSE	Ptma	Prothymosin alpha	1	25.23	3	236417	163439	193389	214449	19246	11087	19171	35958	18.2	15.2	22.2	37.5	-1.4	0.06	-1.2	0.6	-1.1	0.8	1.2	0.6	1.3	0.6	1.1	0.8	0.2
Q$1892	Q9CY97-2	SSU72_MOUSE	Ssu7	Isoform 2 of RNA polymerase II subunit A C-terminal domain phosphatase SSU72	0.9546	9.34	1	236052	129351	261537	252964	55598	10451	11211	19025	52.7	18.1	9.6	16.8	-1.8	0.4	1.1	1	1.1	1	2	0.0002	2	0.002	-1	1	0.02
Q$723	Q80W54	FACE1_MOUSE	Zmpste24	CAAX prenyl protease 1 homolog	0.9996	3.37	1	232257	183971	251544	279351	32658	34044	31223	30273	31.4	41.4	27.8	24.2	-1.3	0.8	1.1	0.8	1.2	0.8	1.4	0.6	1.5	0.4	1.1	0.8	0.2
Q$494	E9Q0X4	E9Q0X4_MOUSE	Col16a1	Collagen alpha-1(XVI) chain	0.9312	1.05	1	231311	131353	241220	429450	55490	20541	24187	148473	53.6	35	22.4	77.3	-1.8	0.5	1	0.9	1.9	0.6	1.8	0.05	3.3	0.5	1.8	0.6	0.1
Q$652	G3UYI4	G3UYI4_MOUSE	Psmd11	26S proteasome non-ATPase regulatory subunit 11	1	33.63	3	228924	190109	254633	289260	38203	26557	20115	35320	37.3	31.2	17.7	27.3	-1.2	0.8	1.1	0.8	1.3	0.7	1.3	0.4	1.5	0.3	1.1	0.8	0.2
Q$798	Q80ZJ2	Q80ZJ2_MOUSE	Impa1	Impa1 protein	0.9994	3.99	1	228052	138889	271964	330725	47289	20771	28993	24740	46.4	33.4	23.8	16.7	-1.6	0.3	1.2	0.5	1.5	0.3	2	0.03	2.4	0.002	1.2	0.3	0.005
Q$235	D3Z159	D3Z159_MOUSE	Myeov2	MCG20113, isoform CRA_d	0.9192	20	1	226992	136874	273503	337710	40557	18800	13940	14152	40	30.7	11.4	9.4	-1.7	0.2	1.2	0.3	1.5	0.1	2	0.002	2.5	0.0002	1.2	0.05	0.0002
Q$73	P16254	SRP14_MOUSE	Srp14	Signal recognition particle 14 kDa protein	0.9842	12.73	1	226453	153288	174882	190548	32357	15074	18173	20544	32	22	23.2	24.1	-1.5	0.4	-1.3	0.6	-1.2	0.8	1.1	0.8	1.2	0.6	1.1	0.8	0.2
Q$1132	P55096	ABCD3_MOUSE	Abcd3	ATP-binding cassette sub-family D member 3	0.9691	1.82	1	223777	159435	207175	236131	32784	11935	15419	17601	32.8	16.7	16.6	16.7	-1.4	0.4	-1.1	0.9	1.1	0.9	1.3	0.2	1.5	0.04	1.1	0.6	0.09
Q$104	Q9D3L3	Q9D3L3_MOUSE	Snap23	Synaptosomal-associated protein	0.9996	7.69	1	216812	194091	230596	204636	44083	12840	33871	39165	45.5	14.8	32.8	42.8	-1.1	1	1.1	1	-1.1	1	1.2	0.9	1.1	1	-1.1	1	0.9
Q$271	D3Z6Q9	BIN2_MOUSE	Bin2	Bridging integrator 2	0.9995	3.27	1	214393	192184	193722	223297	24044	19328	21708	17518	25.1	22.5	25.1	17.5	-1.1	0.9	-1.1	0.9	1	0.9	1	1	1.2	0.8	1.2	0.9	0.7
Q$1357	Q3TW96-2	UAP1L_MOUSE	Uap1l	Isoform 2 of UDP-N-acetylhexosamine pyrophosphorylase-like protein 1	1	2.62	1	213014	226122	197279	191120	20818	17468	10708	9026	21.9	17.3	12.1	10.6	1.1	0.9	-1.1	0.9	-1.1	0.8	-1.1	0.7	-1.2	0.5	-1	0.9	0.4
Q$2022	Q9JKB3-2	YBOX3_MOUSE	Ybx	Isoform 2 of Y-box-binding protein 3	1	10.96	2	210863	167563	249432	205646	18309	15105	50067	25482	19.4	20.2	44.9	27.7	-1.3	0.5	1.2	0.8	-1	0.9	1.5	0.6	1.2	0.7	-1.2	0.8	0.3
Q$804	O70172	PI42A_MOUSE	Pip4k2a	Phosphatidylinositol 5-phosphate 4-kinase type-2 alpha	0.939	2.22	1	210285	158599	250114	268320	34020	17394	32446	22200	36.2	24.5	29	18.5	-1.3	0.6	1.2	0.7	1.3	0.6	1.6	0.2	1.7	0.03	1.1	0.7	0.05
Q$744	Q9Z1G4	VPP1_MOUSE	Atp6v0a1	V-type proton ATPase 116 kDa subunit a isoform 1	0.9545	1.55	1	209755	165080	231967	317153	63169	43844	35180	35424	67.3	59.4	33.9	25	-1.3	0.8	1.1	0.8	1.5	0.5	1.4	0.6	1.9	0.2	1.4	0.5	0.2
Q$205	D3YYB0	D3YYB0_MOUSE	Rps27l	40S ribosomal protein S27	1	12.38	1	209063	146393	178734	214465	19954	14871	5852	32532	21.3	22.7	7.3	33.9	-1.4	0.2	-1.2	0.5	1	0.9	1.2	0.3	1.5	0.3	1.2	0.6	0.1
Q$1207	P62849-2	RS24_MOUSE	Rps2	Isoform 2 of 40S ribosomal protein S24	0.9985	9.23	1	208492	158847	246939	380001	29663	32763	41534	65831	31.8	46.1	37.6	38.7	-1.3	0.5	1.2	0.5	1.8	0.2	1.6	0.4	2.4	0.1	1.5	0.4	0.02
Q$62	P15379-3	CD44_MOUSE	Cd4	Isoform 12 of CD44 antigen	1	4.34	2	207316	132776	244280	313721	42042	15393	21411	12194	45.3	25.9	19.6	8.7	-1.6	0.3	1.2	0.5	1.5	0.2	1.8	0.01	2.4	9e-05	1.3	0.09	0.001
[truncated: 129 more rows]

## Sheet: ANOVA p<0.01
Entry Q#	Protein ID	Protein Entry	Gene Name	Protein Name	Protein Probability	Protein Coverage (%)	# of Identified Peptides	mean Control	mean 6mo 0.1Gy	mean 6mo 0.25Gy	mean 6mo 0.5Gy	SEM Control	SEM 6mo 0.1Gy	SEM 6mo 0.25Gy	SEM 6mo 0.5Gy	CV(%) Control	CV(%) 6mo 0.1Gy	CV(%) 6mo 0.25Gy	CV(%) 6mo 0.5Gy	FC 6mo 0.1Gy Control	Multiple_Comparison_p 6mo 0.1Gy Control	FC 6mo 0.25Gy Control	Multiple_Comparison_p 6mo 0.25Gy Control	FC 6mo 0.5Gy Control	Multiple_Comparison_p 6mo 0.5Gy Control	FC 6mo 0.25Gy 6mo 0.1Gy	Multiple_Comparison_p 6mo 0.25Gy 6mo 0.1Gy	FC 6mo 0.5Gy 6mo 0.1Gy	Multiple_Comparison_p 6mo 0.5Gy 6mo 0.1Gy	FC 6mo 0.5Gy 6mo 0.25Gy	Multiple_Comparison_p 6mo 0.5Gy 6mo 0.25Gy	ANOVA_p_value
[truncated: 577 more rows]

[truncated: 3 more sheets: 0.1 Gy, 0.25 Gy, 0.5Gy]
